# Supplementary material for: Fluidics system for resolving concentration-dependent effects of dissolved gases on tissue metabolism
Source: eLife. 2021 Nov 4;10:e66716. doi: 10.7554/eLife.66716 (PMC8660022; doi:10.7554/eLife.66716)
Supplement: Appendix 1—figure 1—source data 1. [file elife-66716-app1-fig1-data1.xlsx]

## Sheet: Appendix Fig. 1A
		Time, hours	Chamber 1	Chamber 3	Chamber 4	Average	SE
		-0.166667	0.255	0.217	0.229	0.233667	0.0112151
		-0.0833333	0.203	0.229	0.245	0.225667	0.0122384
		0	0.259	0.28	0.278	0.272333	0.00669162
		0.0833333	1.159	0.982	1.38	1.17367	0.115127
		0.25	1.998	1.818	1.862	1.89267	0.0541767
		0.416667	3.639	3.699	3.214	3.51733	0.152652
		0.583333	4.056	3.861	3.79	3.90233	0.0795201
		0.75	3.983	3.877	3.684	3.848	0.0875233
		0.916667	4.238	4.11	3.749	4.03233	0.146406
		1.08333	4.206	3.794	3.643	3.881	0.168245
		1.25	4.084	4.007	3.872	3.98767	0.0619579
		1.41667	4.117	3.849	3.643	3.86967	0.137222
		1.58333	4.271	3.739	4.162	4.05733	0.162247
		1.75	3.983	3.542	3.953	3.826	0.142264
		1.91667	4.04	3.767	3.884	3.897	0.0790759
		2.08333	4.449	3.569	3.872	3.96333	0.258106
		2.25	4.145	4.019	3.998	4.054	0.0459021
		2.41667	3.87	3.877	4.1	3.949	0.075527
		2.58333	4.068	4.001	4.272	4.11367	0.0814951
		2.75	4.206	4.125	3.912	4.081	0.0876755
		2.91667	4.117	3.684	3.696	3.83233	0.142375
		3.08333	3.44	3.778	3.872	3.69667	0.131171
		3.25	3.217	3.96	4.027	3.73467	0.259555
		3.41667	2.994	3.301	3.324	3.20633	0.106374
		3.58333	2.82	3.009	2.949	2.926	0.0557584
		3.75	2.772	2.792	2.908	2.824	0.042395
		3.91667	2.751	2.745	2.708	2.73467	0.0134454

## Sheet: Appendix Fig. 1B
				Time, hours	Chamber 3	Chamber 4	Average	SE
				-0.166667	0.297	0.337	0.317	0.02
				-0.0833333	0.226	0.358	0.292	0.066
				0	0.233	0.316	0.2745	0.0415
				0.0833333	0.726	1.327	1.0265	0.3005
				0.25	2.01	2.246	2.128	0.118
				0.416667	3.203	3.552	3.3775	0.1745
				0.583333	3.941	3.717	3.829	0.112
				0.75	4.238	3.616	3.927	0.311
				0.916667	4.159	3.632	3.8955	0.2635
				1.08333	3.764	3.161	3.4625	0.3015
				1.25	3.568	2.84	3.204	0.364
				1.41667	3.384	2.798	3.091	0.293
				1.58333	3.331	2.756	3.0435	0.2875
				1.75	3.35	2.794	3.072	0.278
				1.91667	2.8	2.267	2.5335	0.2665
				2.08333	1.95	1.812	1.881	0.069
				2.25	1.976	1.799	1.8875	0.0885
				2.41667	1.908	1.707	1.8075	0.1005
				2.58333	1.378	1.079	1.2285	0.1495
				2.75	0.79	0.586	0.688	0.102
				2.91667	0.181	0	0.0905	0.0905
				3.08333	0.117		0.117
				3.25	0	0	0	0
				3.41667	0	0	0	0
				3.58333	0	0	0	0
				3.75	0	0	0	0
				3.91667	0.32	0	0.16	0.16

## Sheet: Appendix Fig. 1C
			Normalized Calcium
			Response to H2S		Response to NaHS					Control (no H2S)
		Adj time	70121		6/10/21	3/16/21	7/8/21	Average		062521	070721	Average	Smoothed
		-72.5	-0.300507							-0.178762	-3.81095	-1.99486	-1.99655
		-72	-0.297905							-0.173826	-3.81095	-1.99239	-1.99483
		-71.5	-0.303792							-0.168342	-3.81095	-1.98965	-1.99328
		-71	-0.30256							-0.164503	-3.81095	-1.98773	-1.99115
		-70.5	-0.295304							-0.167794	-3.81095	-1.98937	-1.98978
		-70	-0.296947							-0.164869	-3.81095	-1.98791	-1.98866
		-69.5	-0.295715							-0.158471	-3.81095	-1.98471	-1.98743
		-69	-0.296673							-0.153718	-3.81095	-1.98233	-1.98608
		-68.5	-0.290376							-0.159385	-3.81095	-1.98517	-1.98503
		-68	-0.29284							-0.151159	-3.81095	-1.98105	-1.98332
		-67.5	-0.289006							-0.150976	-3.81095	-1.98096	-1.98238
		-67	-0.284352		-0.351007	-6.94096	-0.528826	-2.60693		-0.146954	-3.81095	-1.97895	-1.98153
		-66.5	-0.280929		-0.352134	-6.94096	-0.524647	-2.60592		-0.137997	-3.81095	-1.97447	-1.97886
		-66	-0.280929		-0.34725	-6.94096	-0.513003	-2.60041		-0.137814	-3.81095	-1.97438	-1.97719
		-65.5	-0.279697		-0.343117	-6.94096	-0.516586	-2.60022		-0.137631	-3.81095	-1.97429	-1.97552
		-65	-0.278191		-0.339359	-6.94096	-0.503151	-2.59449		-0.133061	-3.81095	-1.97201	-1.97379
		-64.5	-0.270798		-0.331093	-6.94096	-0.501957	-2.59134		-0.132696	-3.81095	-1.97182	-1.97312
		-64	-0.270114		-0.327335	-6.94096	-0.493598	-2.5873		-0.131233	-3.81095	-1.97109	-1.9723
		-63.5	-0.267923		-0.329214	-6.94096	-0.493896	-2.58803		-0.129405	-3.81095	-1.97018	-1.97127
		-63	-0.267102		-0.324893	-6.94096	-0.479865	-2.58191		-0.128125	-3.81095	-1.96954	-1.97066
		-62.5	-0.262036		-0.320948	-6.94096	-0.480462	-2.58079		-0.123007	-3.81095	-1.96698	-1.96945
		-62	-0.267649		-0.313057	-6.94096	-0.467027	-2.57368		-0.125018	-3.81095	-1.96798	-1.96867
		-61.5	-0.262995		-0.314936	-6.94096	-0.481357	-2.57909		-0.123555	-3.81095	-1.96725	-1.96794
		-61	-0.260393		-0.301221	-6.94096	-0.464042	-2.56874		-0.123921	-3.81095	-1.96743	-1.96741
		-60.5	-0.250673		-0.296524	-6.94096	-0.459265	-2.56558		-0.117157	-3.81095	-1.96405	-1.96668
		-60	-0.246566		-0.298403	-6.94096	-0.448517	-2.56263		-0.118071	-3.81095	-1.96451	-1.96581
		-59.5	-0.244375		-0.297088	-6.94096	-0.459265	-2.56577		-0.110942	-3.81095	-1.96095	-1.96424
		-59	-0.237804		-0.284876	-6.94096	-0.450308	-2.55872		-0.112953	-3.81095	-1.96195	-1.96286
		-58.5	-0.236983		-0.28544	-6.94096	-0.453891	-2.5601		-0.107834	-3.81095	-1.95939	-1.9617
		-58	-0.23534		-0.282622	-6.94096	-0.443442	-2.55568		-0.112221	-3.81095	-1.96159	-1.96097
		-57.5	-0.230685		-0.27398	-6.94096	-0.441949	-2.5523		-0.103447	-0.356613	-0.23003	-1.52824
		-57	-0.229179		-0.275483	-6.94096	-0.435978	-2.55081		-0.107103	-0.355531	-0.231317	-1.09558
		-56.5	-0.228494		-0.272289	-6.94096	-0.422842	-2.54537		-0.104544	-0.350479	-0.227511	-0.662611
		-56	-0.216858		-0.266841	-6.94096	-0.432694	-2.54683		-0.109662	-0.349938	-0.2298	-0.229665
		-55.5	-0.220828		-0.254441	-6.94096	-0.415378	-2.53693		-0.110393	-0.340737	-0.225565	-0.228548
		-55	-0.2185		-0.256508	-6.94096	-0.410005	-2.53583		-0.108383	-0.341098	-0.22474	-0.226904
		-54.5	-0.216036		-0.256508	-6.94096	-0.412094	-2.53652		-0.099608	-0.339835	-0.219721	-0.224957
		-54	-0.212614		-0.249556	-6.94096	-0.408213	-2.53291		-0.10107	-0.335325	-0.218197	-0.222056
		-53.5	-0.21275		-0.248617	-6.94096	-0.40075	-2.53011		-0.101984	-0.334062	-0.218023	-0.220171
		-53	-0.206453		-0.239599	-6.94096	-0.401347	-2.5273		-0.093027	-0.330634	-0.21183	-0.216943
		-52.5	-0.20659		-0.237345	-6.94096	-0.374478	-2.5176		-0.106737	-0.325402	-0.21607	-0.21603
		-52	-0.201935		-0.234902	-6.94096	-0.37597	-2.51728		-0.0979627	-0.31999	-0.208976	-0.213725
		-51.5	-0.197828		-0.234527	-6.94096	-0.372388	-2.51596		-0.0899194	-0.314397	-0.202158	-0.209759
		-51	-0.194816		-0.227575	-6.94096	-0.362834	-2.51046		-0.091199	-0.313134	-0.202166	-0.207343
		-50.5	-0.191667		-0.2272	-6.94096	-0.375075	-2.51441		-0.0933926	-0.311691	-0.202542	-0.203961
		-50	-0.186328		-0.215927	-6.94096	-0.364924	-2.50727		-0.0963175	-0.305917	-0.201118	-0.201996
		-49.5	-0.186054		-0.221376	-6.94096	-0.366417	-2.50959		-0.0922958	-0.303031	-0.197663	-0.200872
		-49	-0.184548		-0.211982	0.0651409	-0.367014	-0.171285		-0.0871773	-0.295814	-0.191496	-0.198205
		-48.5	-0.182768		-0.212734	0.0574987	-0.364625	-0.173287		-0.0822416	-0.292206	-0.187224	-0.194375
		-48	-0.175375		-0.207473	0.0731471	-0.359252	-0.164526		-0.0868117	-0.287876	-0.187344	-0.190932
		-47.5	-0.170584		-0.205219	0.0687801	-0.354176	-0.163538		-0.0840696	-0.288418	-0.186244	-0.188077
		-47	-0.168119		-0.205407	0.0698718	-0.342234	-0.159256		-0.0798651	-0.275608	-0.177737	-0.184637
		-46.5	-0.167435		-0.201461	0.0658687	-0.351191	-0.162261		-0.0774887	-0.287696	-0.182592	-0.183479
		-46	-0.163875		-0.199395	0.0484008	-0.338353	-0.163116		-0.075295	-0.275969	-0.175632	-0.180551
		-45.5	-0.159494		-0.195637	0.0582265	-0.335368	-0.157593		-0.0754778	-0.278675	-0.177077	-0.178259
		-45	-0.156482		-0.19451	0.0469451	-0.32462	-0.157395		-0.0736498	-0.281923	-0.177786	-0.178272
		-44.5	-0.153334		-0.193383	0.0556791	-0.327904	-0.155203		-0.0794995	-0.270737	-0.175118	-0.176403
		-44	-0.152923		-0.20334	0.0749666	-0.327009	-0.151794		-0.0703593	-0.282284	-0.176321	-0.176576
		-43.5	-0.150732		-0.206534	0.0607739	-0.320441	-0.1554		-0.0694453	-0.275969	-0.172707	-0.175483
		-43	-0.14553		-0.199583	0.0338442	-0.319246	-0.161662		-0.0709077	-0.271098	-0.171003	-0.173788
		-42.5	-0.145667		-0.198643	0.0585904	-0.299244	-0.146432		-0.0714561	-0.261356	-0.166406	-0.171609
		-42	-0.14553		-0.196764	0.0393029	-0.319843	-0.159102		-0.0710905	-0.259191	-0.165141	-0.168814
		-41.5	-0.140875		-0.201461	0.0589543	-0.310887	-0.151131		-0.0703593	-0.257387	-0.163873	-0.166606
		-41	-0.134988		-0.194322	0.0524039	-0.301632	-0.14785		-0.072553	-0.248547	-0.16055	-0.163992
		-40.5	-0.134715		-0.192443	0.0469451	-0.301035	-0.148844		-0.0685313	-0.24981	-0.15917	-0.162184
		-40	-0.132661		-0.183989	0.0578626	-0.295363	-0.140496		-0.0630471	-0.240789	-0.151918	-0.158878
		-39.5	-0.128006		-0.187559	0.0753306	-0.296258	-0.136162		-0.0597567	-0.240609	-0.150183	-0.155455
		-39	-0.126226		-0.186995	0.0451256	-0.28969	-0.143853		-0.0615847	-0.24115	-0.151367	-0.15316
		-38.5	-0.122119		-0.178541	0.0494925	-0.282824	-0.137291		-0.0590255	-0.238083	-0.148554	-0.150506
		-38	-0.117328		-0.17685	0.0622296	-0.27954	-0.131387		-0.0564662	-0.231768	-0.144117	-0.148555
		-37.5	-0.116917		-0.179856	0.0414864	-0.275957	-0.138109		-0.0535413	-0.231768	-0.142655	-0.146673
		-37	-0.11281		-0.180232	0.0520399	-0.274166	-0.134119		-0.0507993	-0.228521	-0.13966	-0.143747
		-36.5	-0.112947		-0.17685	0.0418503	-0.250282	-0.128427		-0.0582942	-0.219861	-0.139078	-0.141378
		-36	-0.109661		-0.173093	0.0371194	-0.25267	-0.129548		-0.0498852	-0.220042	-0.134963	-0.139089
		-35.5	-0.103637		-0.171965	0.0796975	-0.250879	-0.114382		-0.0520789	-0.22347	-0.137774	-0.137869
		-35	-0.104458		-0.17328	0.056043	-0.239534	-0.118924		-0.0553694	-0.212284	-0.133827	-0.136411
		-34.5	-0.098024		-0.171214	0.0378472	-0.235653	-0.123007		-0.0509821	-0.209397	-0.13019	-0.134189
		-34	-0.0978871		-0.165953	0.0636853	-0.230578	-0.110949		-0.0493368	-0.211743	-0.13054	-0.133083
		-33.5	-0.0952859		-0.157123	0.0382112	-0.126385	-0.0817657		-0.0454979	-0.202181	-0.123839	-0.129599
		-33	-0.0913157		-0.16445	0.0600461	-0.217143	-0.107183		-0.0471432	-0.197129	-0.122136	-0.126676
		-32.5	-0.0892621		-0.158063	0.0658687	-0.211172	-0.101122		-0.0442183	-0.194062	-0.11914	-0.123914
		-32	-0.0847442		-0.158439	0.0524039	-0.209381	-0.105139		-0.0504337	-0.196408	-0.123421	-0.122134
		-31.5	-0.0818692		-0.158814	0.0582265	-0.210277	-0.103621		-0.0418419	-0.191717	-0.116779	-0.120369
		-31	-0.0818692		-0.160505	0.0564069	-0.196842	-0.100313		-0.0363577	-0.181975	-0.109166	-0.117127
		-30.5	-0.0729704		-0.153178	0.0487647	-0.181616	-0.0953432		-0.0440355	-0.180351	-0.112193	-0.11539
		-30	-0.0711906		-0.152239	0.0458534	-0.195648	-0.100678		-0.0361749	-0.170609	-0.103392	-0.110383
		-29.5	-0.0703692		-0.146603	0.043306	-0.191468	-0.098255		-0.038003	-0.173315	-0.105659	-0.107603
		-29	-0.0665358		-0.1451	0.0454895	-0.192961	-0.0975237		-0.0369061	-0.175661	-0.106283	-0.106882
		-28.5	-0.0653037		-0.146227	0.0498565	-0.187587	-0.0946525		-0.0418419	-0.172233	-0.107037	-0.105593
		-28	-0.064893		-0.131949	0.0513121	-0.180123	-0.08692		-0.0403794	-0.169707	-0.105043	-0.106006
		-27.5	-0.0611965		-0.134015	0.0491286	-0.172361	-0.0857493		-0.0367233	-0.161769	-0.0992461	-0.104402
		-27	-0.0594168		-0.132137	0.0600461	-0.171167	-0.0810858		-0.0332501	-0.157439	-0.0953445	-0.101668
		-26.5	-0.0613335		-0.133452	0.0458534	-0.16639	-0.0846628		-0.0334329	-0.15798	-0.0957065	-0.0988351
		-26	-0.0606489		-0.132512	0.0469451	-0.160718	-0.082095		-0.0372717	-0.156176	-0.0967239	-0.0967553
		-25.5	-0.0622918		-0.120488	0.0524039	-0.163106	-0.0770636		-0.0434871	-0.150583	-0.0970352	-0.0962025
		-25	-0.0755716		-0.124997	0.0673244	-0.15624	-0.0713042		-0.030508	-0.149862	-0.0901848	-0.0949126
		-24.5	-0.0831014		-0.125749	0.0232906	-0.152956	-0.085138		-0.0370889	-0.145171	-0.09113	-0.0937685
		-24	-0.0943276		-0.118046	0.0564069	-0.157732	-0.0731239		-0.0392826	-0.143547	-0.0914149	-0.0924412
		-23.5	-0.0943276		-0.112598	0.0480369	-0.155045	-0.0732021		-0.0224646	-0.141563	-0.0820137	-0.0886859
		-23	-0.096518		-0.11504	0.0451256	-0.127579	-0.0658312		-0.0281315	-0.123702	-0.0759168	-0.0851188
		-22.5	-0.0913157		-0.107337	0.0484008	-0.142506	-0.0671477		-0.0308736	-0.128393	-0.0796332	-0.0822446
		-22	-0.0935061		-0.100574	0.0443977	-0.141909	-0.0660286		-0.031422	-0.125326	-0.0783739	-0.0789844
		-21.5	-0.0876192		-0.104144	0.0429421	-0.135938	-0.0657133		-0.0277659	-0.124243	-0.0760046	-0.0774821
		-21	-0.0843335		-0.102829	0.0403946	-0.143104	-0.0685125		-0.0297768	-0.122259	-0.0760178	-0.0775074
		-20.5	-0.0839228		-0.0964409	0.0574987	-0.141014	-0.0599853		-0.0294112	-0.120455	-0.0749329	-0.0763323
		-20	-0.0818692		-0.0958773	0.0436699	-0.12937	-0.0605259		-0.030508	-0.110893	-0.0707004	-0.0744139
		-19.5	-0.0766668		-0.102077	0.0462173	-0.123698	-0.0598526		-0.0328844	-0.112156	-0.0725201	-0.0735428
		-19	-0.0774882		-0.090429	0.0469451	-0.125788	-0.0564239		-0.0345297	-0.0933929	-0.0639613	-0.0705287
		-18.5	-0.0724228		-0.087423	0.0316607	-0.117429	-0.0577303		-0.0327016	-0.11396	-0.0733307	-0.0701281
		-18	-0.0736549		-0.0842292	0.0331163	-0.119518	-0.0568771		-0.0288628	-0.102414	-0.0656381	-0.0688626
		-17.5	-0.0672204		-0.0893017	0.0243824	-0.102501	-0.0558068		-0.0284971	-0.105661	-0.067079	-0.0675023
		-17	-0.0670835		-0.0755871	0.0265658	-0.113547	-0.0541896		-0.0281315	-0.0944754	-0.0613035	-0.0668378
		-16.5	-0.0657144		-0.0678844	0.0327524	-0.1028	-0.0459772		-0.0281315	-0.085094	-0.0566128	-0.0626584
		-16	-0.0647561		-0.0688237	0.0338442	-0.0941418	-0.0430405		-0.0272175	-0.0944754	-0.0608465	-0.0614604
		-15.5	-0.0585954		-0.0690116	0.0291133	-0.0929477	-0.044282		-0.0341641	-0.0874394	-0.0608017	-0.0598911
		-15	-0.0543513		-0.0667571	0.0251102	-0.0893651	-0.0436707		-0.031422	-0.0773363	-0.0543792	-0.05816
		-14.5	-0.0528453		-0.0575514	0.0251102	-0.0804087	-0.0376166		-0.0257551	-0.0735477	-0.0496514	-0.0564197
		-14	-0.0529822		-0.0613088	0.0196514	-0.0836927	-0.0417834		-0.0197225	-0.07896	-0.0493413	-0.0535434
		-13.5	-0.0538037		-0.052291	0.0185597	-0.0714523	-0.0350612		-0.022099	-0.0726456	-0.0473723	-0.050186
		-13	-0.0472322		-0.0500365	0.0221989	-0.0738406	-0.0338928		-0.0237442	-0.0735477	-0.048646	-0.0487527
		-12.5	-0.0424406		-0.0519152	0.0400307	-0.0684668	-0.0267838		-0.022099	-0.0643467	-0.0432229	-0.0471456
		-12	-0.0433989		-0.0511638	0.0429421	-0.069661	-0.0259609		-0.00875429	-0.0612797	-0.035017	-0.0435645
		-11.5	-0.043262		-0.0462791	0.0447616	-0.0610031	-0.0208402		-0.0135072	-0.0524396	-0.0329734	-0.0399648
		-11	-0.0362798		-0.0342553	0.0316607	-0.0627944	-0.0217963		-0.0178945	-0.0475685	-0.0327315	-0.0359862
		-10.5	-0.036006		-0.044964	0.0221989	-0.0574206	-0.0267286		-0.011862	-0.0445015	-0.0281817	-0.0322259
		-10	-0.0316251		-0.0338796	0.0272937	-0.0526438	-0.0197432		-0.0091199	-0.0394499	-0.0242849	-0.0295429
		-9.5	-0.0325834		-0.0344432	0.0451256	-0.0520467	-0.0137881		-0.0193569	-0.0547849	-0.0370709	-0.0305673
		-9	-0.0276548		-0.0327523	0.0236545	-0.0436874	-0.0175951		-0.015518	-0.0419757	-0.0287469	-0.0295711
		-8.5	-0.0290239		-0.0306857	0.021471	-0.0269688	-0.0120612		-0.0129588	-0.0353005	-0.0241296	-0.0285581
		-8	-0.0220417		-0.0280555	0.00509482	-0.0308499	-0.0179369		-0.0100339	-0.0365634	-0.0232986	-0.0283115
		-7.5	-0.0228631		-0.0197892	0.00618657	-0.0320441	-0.0152156		-0.00601223	-0.0325943	-0.0193033	-0.0238696
		-7	-0.0197143		-0.0111471	0.017468	-0.0299542	-0.00787778		-0.011862	-0.0353005	-0.0235812	-0.0225782
		-6.5	-0.0195774		-0.0162196	0.0123731	-0.0215949	-0.00848046		-0.00802307	-0.0224913	-0.0152572	-0.0203601
		-6	-0.013006		-0.0143409	0.0109175	-0.018908	-0.0074438		-0.00125932	-0.0168985	-0.00907892	-0.0168051
		-5.5	-0.0156072		-0.0145288	0.0112814	-0.0150269	-0.00609141		-0.00619503	-0.0190635	-0.0126292	-0.0151366
		-5	-0.0146488		-0.00832898	-0.00727831	-0.0195051	-0.0117041		2.03116e-05	-0.00499138	-0.00248553	-0.00986272
		-4.5	-0.0120476		-0.00457155	0.0047309	-0.00487627	-0.0015723		-0.00564662	-0.00625426	-0.00595044	-0.00753604
		-4	-0.0097203		-0.00212921	0.00291133	-0.0153254	-0.00484777		0.000203116	-0.0037285	-0.00176269	-0.00570698
		-3.5	-0.0026012		-0.00645027	0.0134649	0.0037816	0.00359874		-0.00619503	-0.00102233	-0.00360868	-0.00345184
		-3	-0.0017798		-0.000626239	-0.0181958	0.000497578	-0.00610815		0.000751528	0.00168384	0.00121768	-0.00252603
		-2.5	0.00397025		0.000500992	0.00655048	0.00527433	0.0041086		-0.000162493	0.000962194	0.000399851	-0.00093846
		-2	0.00397025		0.00331907	0.0116453	0.00199031	0.00565156		0.00148275	0.00439001	0.00293638	0.000236308
		-1.5	0.00670835		0.00538566	-0.00254741	0.0136336	0.00549063		0.00331079	0.00763741	0.0054741	0.002507
		-1	0.00862502		0.0129005	-0.0112814	0.0145293	0.00538281		0.00623565	0.00132302	0.00377934	0.00314742
		-0.5	0.00670835		0.0108339	-0.00109175	0.0216944	0.0104789		0.00349359	0.0119673	0.00773044	0.00498006
		0	0.00451787		0.0106461	-0.0203793	0.019306	0.00319094		0.0120854	0.016658	0.0143717	0.00783889
		0.5	-0.0001369		0.00613715	-0.0269298	0.021993	0.000400117		0.00952613	0.0153951	0.0124606	0.00958552
		1	-0.010131		0.00594927	-0.0105536	0.0297552	0.00838364		0.0168383	0.0143126	0.0155755	0.0125346
		1.5	-0.0242322		-0.00194134	-0.00509482	0.0231872	0.00538366		0.0234193	0.0146735	0.0190464	0.0153635
		2	-0.0433989		-0.0152802	-0.00837006	0.0300537	0.00213448		0.0594317	0.00709618	0.0332639	0.0200866
		2.5	-0.0663989		-0.0284313	-0.0189236	0.0228886	-0.00815543		0.181728	-0.000300686	0.0907135	0.0396498
		3	-0.0564049		-0.0164075	-0.00946181	0.00945399	-0.00547176		0.719172	-0.014914	0.352129	0.123788
		3.5	0.255465		0.0117733	0.00837006	-0.00368208	0.00548709		1.12683	-0.0201459	0.55334	0.257362
		4	0.839912		0.358773	0.00218349	-0.0260731	0.111628		1.16741	-0.0176202	0.574894	0.392769
		4.5	1.00557		0.98664	0.0393029	-0.0460758	0.326622		1.142	0.0208074	0.581403	0.515441
		5	1.09524		1.0988	0.0269298	0.0303523	0.385361		1.13816	0.125085	0.631622	0.585315
		5.5	1.18382		1.15591	0.147022	0.636104	0.646346		1.11366	0.468588	0.791126	0.644761
		6	1.18834		1.16568	0.368283	1.08154	0.871834		1.09081	0.862607	0.97671	0.745215
		6.5	1.1689		1.14671	0.818446	1.23111	1.06542		1.08496	1.11933	1.10215	0.875401
		7	1.12413		1.11853	1.0841	1.22991	1.14418		1.05864	1.16588	1.11226	0.995561
		7.5	1.08566		1.10331	1.18455	1.21111	1.16632		1.05645	1.23913	1.14779	1.08473
		8	1.03884		1.08828	1.16162	1.1911	1.147		1.04475	1.25121	1.14798	1.12754
		8.5	1.00817		1.0462	1.14961	1.17618	1.12399		1.02482	1.20178	1.1133	1.13033
		9	0.962716		1.009	1.10885	1.15886	1.09224		1.01806	1.15848	1.08827	1.12433
		9.5	0.925615		0.98664	1.06846	1.16155	1.07221		1.00965	1.0616	1.03562	1.09629
		10	0.896591		0.964659	1.07865	1.19051	1.07794		1.02043	0.983482	1.00196	1.05979
		10.5	0.811573		0.936478	1.0317	1.13587	1.03468		0.994658	0.931524	0.963091	1.02224
		11	0.8024		0.929339	1.03789	1.10811	1.02511		0.999411	0.833741	0.916576	0.979312
		11.5	0.815543		0.923515	1.00586	1.1087	1.01269		1.00526	0.744979	0.87512	0.939186
		12	0.877972		0.90811	0.969835	1.07915	0.985698		0.995024	0.623201	0.809112	0.890975
		12.5	0.801579		0.907358	1.00222	1.07766	0.995746		1.00983	0.663974	0.836902	0.859428
		13	0.833478		0.901722	0.987667	1.10751	0.998967		0.991368	0.807762	0.899565	0.855175
		13.5	0.98202		0.923327	1.01933	1.08572	1.00946		0.994292	0.795313	0.894803	0.860096
		14	0.946151		0.935727	1.0226	1.03019	0.996172		0.987529	0.642324	0.814927	0.861549
		14.5	0.918496		0.938733	1.00477	0.993764	0.979089		0.995206	0.561861	0.778534	0.846957
		15	0.877835		0.945872	1.02806	0.977642	0.983859		0.978388	0.713046	0.845717	0.833495
		15.5	0.942454		0.955078	1.03279	1.02989	1.00592		0.992099	0.992322	0.992211	0.857847
		16	1.00666		0.967477	1.00987	1.0484	1.00858		1.00362	0.926833	0.965224	0.895421
		16.5	0.933966		0.962781	1.02006	1.01705	0.999962		0.988991	0.843664	0.916327	0.92987
		17	0.929996		0.975744	1.01896	0.937338	0.977349		1.00325	0.776009	0.88963	0.940848
		17.5	0.989413		0.96635	1.01933	1.02869	1.00479		1.00398	0.645211	0.824596	0.898944
		18	1.03897		0.977622	1.0499	1.006	1.01117		1.01458	1.06773	1.04116	0.917928
		18.5	1.02939		0.968605	1.05172	1.01645	1.01226		1.00654	1.02949	1.01801	0.94335
		19	0.928901		0.981004	1.03534	0.969581	0.995309		1.00014	0.857194	0.928668	0.953109
		19.5	1.01707		0.984762	1.05572	0.933159	0.991213		0.996669	0.716113	0.856391	0.961058
		20	0.960389		0.999603	1.03498	1.05735	1.03064		1.02701	0.858277	0.942646	0.93643
		20.5	0.993246		0.992276	1.0448	1.00332	1.01347		1.02372	1.12691	1.07532	0.950755
		21	0.988865		0.979125	1.01278	1.01496	1.00229		1.03305	0.941627	0.987337	0.965423
		21.5	0.996418		0.988707	1.01569	1.006	1.00347		1.0016	0.945957	0.973781	0.99477
		22	1.01125		1.0028	1.03352	0.954057	0.996792		1.05626	0.948302	1.00228	1.00968
		22.5	1.00689		1.01219	1.01969	0.980031	1.00397		0.990636	1.02877	1.0097	0.993275
		23	0.99895		0.988519	1.01678	0.979732	0.99501		1.00983	0.80686	0.908345	0.973527
		23.5	0.964428		0.987204	1.04371	1.0675	1.03281		1.01093	0.93838	0.974654	0.973746
		24	0.915233		0.994907	1.02442	1.00421	1.00785		0.993378	1.08758	1.04048	0.983295
		24.5	0.865377		1.01801	1.03862	1.02272	1.02645		1.01824	0.997554	1.0079	0.982844
		25	0.848378		1.009	1.05281	1.03765	1.03315		0.980948	0.901576	0.941262	0.991073
		25.5	0.861361		1.00299	1.02442	1.00809	1.01183		0.999594	0.893277	0.946435	0.984018
		26	1.2394		1.02403	1.01787	1.0063	1.01607		0.995206	1.15523	1.07522	0.992704
		26.5	1.00516		0.994719	0.997493	1.00421	0.998808		1.04548	1.17183	1.10865	1.01789
		27	1.00584		1.00073	1.01569	0.946295	0.987571		0.995755	0.997554	0.996655	1.03174
		27.5	0.964085		1.01388	1.00332	1.05317	1.02346		0.988991	0.895261	0.942126	1.03066
		28	0.975175		1.00449	1.0055	0.997048	1.00234		1.00563	0.81588	0.910753	0.989547
		28.5	0.934103		0.995094	0.988395	0.899423	0.960971		0.995572	1.08145	1.03851	0.972011
		29	1.04527		0.988895	0.998949	1.08004	1.02263		1.00691	1.12799	1.06745	0.989709
		29.5	1.02569		0.98138	0.983664	0.98421	0.983085		0.977474	0.952271	0.964873	0.995396
		30	0.934377		0.996785	0.989123	1.02929	1.00507		0.988991	0.80253	0.89576	0.991648
		30.5	1.05581		0.999228	0.977114	1.04183	1.00606		0.93872	0.826344	0.882532	0.952654
		31	1.06567		0.981756	0.972019	1.01914	0.990972		1.01148	1.10706	1.05927	0.950609
		31.5	0.97271		0.99547	0.979661	1.02242	0.999185		1.00307	1.02426	1.01366	0.962806
		32	0.956555		0.965599	0.973839	1.05258	0.997338		1.00965	1.01956	1.01461	0.992517
		32.5	1.00981		0.973865	0.964377	0.899124	0.945789		0.998497	0.877581	0.938039	1.00639
		33	0.917674		0.965974	0.987667	0.988987	0.980876		1.01093	1.04428	1.0276	0.998478
		33.5	0.955597		0.977998	0.971655	1.08721	1.01229		0.953344	0.95191	0.952627	0.983219
		34	1.01789		0.967853	0.94327	0.952564	0.954562		0.998314	0.952271	0.975293	0.973391
		34.5	0.960389		0.976495	0.964741	0.941518	0.960918		0.964678	0.924488	0.944583	0.975027
		35	0.984758		0.97255	0.950912	1.03048	0.984649		0.960839	1.1491	1.05497	0.981868
		35.5	1.01269		1.00956	0.957462	1.02959	0.998871		0.966872	1.12059	1.04373	1.00464
		36	1.0747		0.981004	0.934536	0.960625	0.958722		0.961388	0.900854	0.931121	0.993602
		36.5	1.01789		0.973865	0.953459	1.06153	0.996286		0.991185	0.877581	0.934383	0.991052
		37	0.990919		0.991149	0.926893	0.984509	0.967517		1.01239	0.791885	0.902138	0.952844
		37.5	0.912746		0.98138	0.925074	0.879122	0.928525		0.958828	1.14261	1.05072	0.95459
		38	0.777621		0.966538	0.93308	0.983912	0.961177		0.980948	1.10093	1.04094	0.982044
		38.5	0.717519		0.986828	0.949456	1.07407	1.00345		0.944935	0.944333	0.944634	0.984607
		39	0.775567		0.964096	0.921071	1.07616	0.98711		0.932505	0.863328	0.897917	0.983552
		39.5	0.915895		0.96898	0.935627	0.963312	0.955973		0.943107	0.81588	0.879494	0.940746
		40	1.06882		0.968041	0.911609	0.889869	0.923173		0.944753	0.927735	0.936244	0.914572
		40.5	1.2394		0.958647	0.93126	0.933756	0.941221		0.961936	1.12998	1.04596	0.939903
		41	1.34523		0.962029	0.912701	0.903005	0.925912		0.942376	1.01505	0.978715	0.960102
		41.5	1.32168		0.978374	0.91452	0.900916	0.93127		0.931956	0.888225	0.910091	0.967751
		42	1.34098		0.952635	0.922526	0.988987	0.954716		0.952065	0.880648	0.916356	0.96278
		42.5	1.36494		0.963344	0.925802	1.07407	0.98774		0.930494	1.13214	1.03132	0.95912
		43	1.41204		0.94869	0.89778	0.97197	0.93948		0.926289	1.08956	1.00793	0.966423
		43.5	1.49692		0.959211	0.902875	0.837922	0.900003		0.925924	0.947761	0.936842	0.973111
		44	1.62178		0.958272	0.88759	0.987196	0.944353		0.91916	0.903741	0.91145	0.971884
		44.5	1.70844		0.966538	0.890502	0.897632	0.918224		0.92245	1.07477	0.99861	0.963707
		45	1.79482		0.962968	0.901419	0.910469	0.924952		0.88589	1.04374	0.964815	0.952929
		45.5	1.88327		0.971235	0.903967	0.872852	0.916018		0.90746	1.14242	1.02494	0.974954
		46	1.94337		0.964283	0.904695	0.934054	0.934344		0.935429	0.97807	0.95675	0.986279
		46.5	1.99909		0.953387	0.885043	0.946593	0.928341		0.87547	0.822736	0.849103	0.948902
		47	2.05344		0.952448	0.885043	0.991375	0.942955		0.896309	0.720082	0.808196	0.909748
		47.5	2.093		0.950569	0.88759	0.973164	0.937108		0.886986	0.870004	0.878495	0.873136
		48	2.11984		0.950945	0.882496	0.903602	0.912348		0.900697	1.10761	1.00415	0.884986
		48.5	2.15584		0.973677	0.878856	0.853148	0.901894		0.915687	1.00982	0.962755	0.913399
		49	2.19308		0.940424	0.877765	0.850461	0.88955		0.901794	0.934952	0.918373	0.940943
		49.5	2.22854		0.943242	0.899236	0.977045	0.939841		0.878029	0.871266	0.874648	0.939981
		50	2.26578		0.939484	0.880676	0.890765	0.903642		0.844941	0.92972	0.887331	0.910776
		50.5	2.31014		0.948502	0.880676	0.855238	0.894805		0.874373	0.925931	0.900152	0.895126
		51	2.33889		0.955829	0.871214	0.847774	0.891606		0.905084	1.00225	0.953665	0.903949
		51.5	2.3764		0.94869	0.87267	0.983315	0.934892		0.867244	0.88606	0.876652	0.90445
		52	2.39118		0.922764	0.895233	0.907484	0.908493		0.913493	0.790983	0.852238	0.895677
		52.5	2.41843		0.929527	0.890502	0.854044	0.891358		0.889911	0.731628	0.81077	0.873331
		53	2.45046		0.963908	0.868303	0.814337	0.882183		0.838726	0.749308	0.794017	0.833419
		53.5	2.44567		0.940799	0.8996	0.851357	0.897252		0.881685	0.98258	0.932133	0.847289
		54	2.4799		0.933285	0.871942	0.903602	0.902943		0.863405	1.12078	0.99209	0.882252
		54.5	2.5044		0.949254	0.875581	0.880316	0.901717		0.831779	1.10364	0.967708	0.921487
		55	2.51426		0.958272	0.868303	0.892855	0.906476		0.889728	0.880287	0.885008	0.944235
		55.5	2.52781		0.938733	0.873034	0.887779	0.899849		0.81679	0.731087	0.773938	0.904686
		56	2.54493		0.945496	0.877765	0.834937	0.886066		0.849877	0.704025	0.776951	0.850901
		56.5	2.55876		0.968229	0.87449	0.839713	0.894144		0.871448	0.720803	0.796126	0.808006
		57	2.57039		0.965223	0.874126	0.886287	0.908545		0.878029	1.07279	0.975407	0.830606
		57.5	2.57902		0.943242	0.846468	0.851058	0.880256		0.832328	1.09173	0.962029	0.877628
		58	2.59011		0.96898	0.853746	0.826876	0.883201		0.849512	0.946678	0.898095	0.907914
		58.5	2.60749		0.954138	0.849743	0.868075	0.890652		0.853168	0.889488	0.871328	0.926715
		59	2.61393		0.94343	0.857749	0.933159	0.911446		0.831962	0.82039	0.826176	0.889407
		59.5	2.63337		0.948502	0.838098	0.914649	0.900416		0.83836	0.828689	0.833525	0.857281
		60	2.64405		0.928212	0.842465	0.83434	0.868339		0.83507	0.926112	0.880591	0.852905
		60.5	2.65637		0.959775	0.819538	0.831951	0.870421		0.852619	0.820932	0.836775	0.844267
		61	2.66691		0.918631	0.807893	0.866284	0.864269		0.860663	0.8157	0.838181	0.847268
		61.5	2.66705		0.906419	0.81044	0.851357	0.856072		0.840188	0.851602	0.845895	0.850361
		62	2.68608		0.947939	0.798067	0.840012	0.862006		0.866878	0.898148	0.882513	0.850841
		62.5	2.68868		0.940424	0.809713	0.824189	0.858108		0.829586	1.0091	0.919343	0.871483
		63	2.69799		0.917503	0.815535	0.818517	0.850518		0.847318	1.02335	0.935336	0.895772
		63.5	2.70853		0.92483	0.794064	0.857328	0.858741		0.861577	0.89923	0.880403	0.904399
		64	2.73112		0.904164	0.799887	0.79523	0.833094		0.824467	0.771499	0.797983	0.883266
		64.5	2.73317		0.921073	0.796975	0.826876	0.848308		0.817338	0.752195	0.784766	0.849622
		65	2.72236		0.901346	0.803526	0.837026	0.8473		0.827758	0.785752	0.806755	0.817477
		65.5	2.73618		0.911304	0.791153	0.770749	0.824402		0.832145	0.971214	0.90168	0.822796
		66	2.75124		0.900407	0.791881	0.752538	0.814942		0.855178	1.06629	0.960735	0.863484
		66.5	2.74385		0.918255	0.772229	0.794334	0.828273		0.823188	0.977348	0.900268	0.892359
		67	2.75275		0.909425	0.769682	0.790752	0.823286		0.806735	0.819488	0.813112	0.893949
		67.5	2.7674		0.918631	0.796975	0.837922	0.851176		0.810757	0.722247	0.766502	0.860154
		68	2.77219		0.889135	0.771137	0.811053	0.823775		0.844576	0.733613	0.789094	0.817244
		68.5	2.77561		0.913746	0.786786	0.77881	0.826447		0.799972	0.814978	0.807475	0.794046
		69	2.78301		0.915813	0.769682	0.802992	0.829495		0.817338	1.00297	0.910152	0.818306
		69.5	2.78876		0.917691	0.791153	0.819412	0.842752		0.823736	1.0165	0.920117	0.85671
		70	2.79943		0.915813	0.770774	0.792244	0.826277		0.828855	0.899591	0.864223	0.875492
		70.5	2.79957		0.898716	0.786422	0.784781	0.823306		0.814413	0.858638	0.836525	0.882754
		71	2.81134		0.904728	0.771501	0.800305	0.825512		0.820628	0.738664	0.779646	0.850128
		71.5	2.80779		0.891389	0.781691	0.80747	0.82685		0.828489	0.82436	0.826424	0.826705
		72	2.82462		0.906231	0.756945	0.800305	0.82116		0.818618	0.975364	0.896991	0.834897
		72.5	2.82408		0.924455	0.772229	0.832548	0.843077		0.821177	0.967967	0.894572	0.849408
		73	2.82955		0.910364	0.760948	0.809262	0.826858		0.786627	0.963818	0.875222	0.873302
		73.5	2.84475		0.86659	0.763131	0.791946	0.807222		0.790466	0.941627	0.866046	0.883208
		74	2.84393		0.881244	0.75185	0.79314	0.808745		0.770723	0.840957	0.80584	0.86042
		74.5	2.85557		0.880117	0.75185	0.784482	0.805483		0.714236	0.795133	0.754685	0.825448
		75	2.85995		0.892704	0.752942	0.792244	0.81263		0.903256	0.760133	0.831695	0.814566
		75.5	2.87898		0.849306	0.729287	0.757911	0.778835			0.941086	0.941086	0.833326
		76	2.88021		0.866966	0.75003	0.811949	0.809648		0.863405	0.919797	0.891601	0.854766
		76.5	2.88254		0.887444	0.762403	0.811053	0.8203		0.788272	0.904282	0.846277	0.877665
		77	2.88336		0.869596	0.762767	0.826876	0.819746		0.851522	0.889308	0.870415	0.887345
		77.5	2.9028		0.916376	0.764951	0.794931	0.825419			0.846189	0.846189	0.863621
		78	2.90157		0.901534	0.755853	0.773137	0.810175		0.811854	0.869643	0.840748	0.850907
		78.5	2.90307		0.862833	0.732562	0.762987	0.786127		0.805821	0.930081	0.867951	0.856326
		79	2.90896		0.883874	0.747483	0.774332	0.801896		0.795401	0.913483	0.854442	0.852333
		79.5	2.92169		0.872226	0.744572	0.784482	0.800427		0.804359	0.831937	0.818148	0.845322
		80	2.92908		0.881808	0.735474	0.766868	0.794716		0.790649	0.765365	0.778007	0.829637
		80.5	2.93743		0.916188	0.730743	0.886287	0.844406		0.80509	0.756886	0.780988	0.807896
		81	2.93497		0.888571	0.724192	0.934651	0.849138		0.780229	0.845468	0.812848	0.797498
		81.5	2.92183		0.874481	0.723101	0.962715	0.853432		0.816607	1.04897	0.932789	0.826158
		82	2.94852		0.891577	0.720189	0.88151	0.831092		0.814047	1.06232	0.938185	0.866203
		82.5	2.9566		0.878614	0.700174	0.794036	0.790941		0.789369	0.955158	0.872263	0.889021
		83	2.96139		0.882371	0.707816	0.768659	0.786282		0.827575	0.857736	0.842655	0.896473
		83.5	2.96002		0.843858	0.686345	0.768062	0.766088		0.813865	0.779076	0.79647	0.862393
		84	2.9807		0.885002	0.691804	0.754329	0.777045		0.79723	0.751293	0.774261	0.821413
		84.5	2.98699		0.858512	0.684525	0.760598	0.767879		0.816058	0.903019	0.859539	0.818231
		85	2.97467		0.874481	0.686345	0.810456	0.790427		0.81423	0.947761	0.880996	0.827816
		85.5	2.98686		0.901722	0.668513	0.805679	0.791971		0.820994	0.890751	0.855872	0.842667
		86	2.99315		0.87542	0.653229	0.808664	0.779104		0.813316	0.858277	0.835797	0.858051
		86.5	2.99466		0.859827	0.669605	0.79314	0.774191		0.810026	0.78954	0.799783	0.843112
		87	2.99726		0.884062	0.652865	0.786572	0.7745		0.811854	0.763741	0.787798	0.819812
		87.5	2.99726		0.859451	0.665238	0.768361	0.76435		0.809295	0.932606	0.87095	0.823582
		88	3.01095		0.828264	0.65432	0.77672	0.753102		0.812037	0.990158	0.901097	0.839907
		88.5	3.01862		0.851936	0.643767	0.794931	0.763545		0.803262	0.943431	0.873347	0.858298
		89	3.02026		0.862833	0.673244	0.854641	0.796906		0.808929	0.85954	0.834234	0.869907
		89.5	3.02724		0.867905	0.652501	0.917336	0.812581		0.813499	0.783045	0.798272	0.851738
		90	3.02916		0.86039	0.661963	0.874345	0.798899		0.819714	0.788277	0.803996	0.827462
		90.5	3.03669		0.874105	0.640128	0.814038	0.77609		0.818252	0.884076	0.851164	0.821917
		91	3.04942		0.86922	0.623752	0.781198	0.758057		0.82465	0.962555	0.893602	0.836759
		91.5	3.05682		0.855506	0.621568	0.809859	0.762311		0.810391	0.936575	0.873483	0.855561
		92	3.06476		0.862081	0.610651	0.773734	0.748822		0.815144	0.874694	0.844919	0.865792
		92.5	3.06051		0.844421	0.643403	0.761196	0.749673		0.819714	0.844024	0.831869	0.860969
		93	3.07119		0.847615	0.64122	0.782989	0.757275		0.820811	0.80704	0.813926	0.841049
		93.5	3.07612		0.854754	0.622296	0.825682	0.767577		0.818069	0.782865	0.800467	0.822795
		94	3.0842		0.865087	0.627391	0.766569	0.753016		0.82465	0.900674	0.862662	0.827231
		94.5	3.07817		0.840476	0.612834	0.786871	0.746727		0.82136	0.959307	0.890333	0.841847
		95	3.07667		0.865275	0.619748	0.840012	0.775012		0.824102	0.930802	0.877452	0.857729
		95.5	3.0727		0.872414	0.614654	0.877927	0.788332		0.812951	0.844746	0.828848	0.864824
		96	3.05285		0.855881	0.604464	0.829563	0.763303		0.812219	0.785391	0.798805	0.84886
		96.5	3.03765		0.857948	0.602281	0.760598	0.740276		0.822091	0.771138	0.796615	0.82543
		97	2.98836		0.825258	0.599005	0.748657	0.724307		0.820263	0.780159	0.800211	0.80612
		97.5	2.95674		0.849682	0.600461	0.763584	0.737909		0.818069	0.96057	0.88932	0.821238
		98	2.90225		0.830143	0.617565	0.762091	0.7366		0.818069	0.983663	0.900866	0.846753
		98.5	2.84229		0.84273	0.613926	0.792244	0.749634		0.819714	0.936936	0.878325	0.86718
		99	2.74878		0.834652	0.60592	0.809859	0.750143		0.819166	0.857194	0.83818	0.876673
		99.5	2.65363		0.84104	0.604464	0.787766	0.744423		0.810391	0.778896	0.794644	0.853004
		100	2.51495		0.824883	0.598277	0.785676	0.736279		0.81423	0.777813	0.796022	0.826793
		100.5	2.32314		0.820374	0.59573	0.789856	0.73532		0.817155	0.752917	0.785036	0.80347
		101	1.96472		0.833337	0.576443	0.782094	0.730624		0.813682	0.84222	0.827951	0.800913
		101.5	1.54429		0.815865	0.617201	0.772242	0.735103		0.821908	0.969771	0.89584	0.826212
		102	1.229		0.82244	0.58736	0.775227	0.728342		0.809477	1.02444	0.916957	0.856446
		102.5	1.09866		0.846488	0.592455	0.772242	0.737061		0.812951	0.898328	0.855639	0.874097
		103	1.05266		0.830707	0.592091	0.761494	0.728097		0.810574	0.827607	0.819091	0.871882
		103.5	1.02638		0.81981	0.575351	0.77045	0.72187		0.818252	0.768793	0.793522	0.846302
		104	1.01118		0.845736	0.573167	0.77254	0.730481		0.817155	0.740288	0.778722	0.811743
		104.5	1.00598		0.809289	0.590635	0.768361	0.722762		0.806918	0.765004	0.785961	0.794324
		105	1.00406		0.81718	0.578626	0.769555	0.721787		0.811305	0.882632	0.846969	0.801294
		105.5	0.998859		0.841791	0.583357	0.762688	0.729279		0.821725	0.931163	0.876444	0.822024
		106	0.992698		0.795199	0.58918	0.774929	0.719769		0.807467	0.917813	0.86264	0.843003
		106.5	0.995026		0.819059	0.577898	0.779108	0.725355		0.815144	0.864591	0.839868	0.85648
		107	0.985716		0.819622	0.588452	0.768958	0.725677		0.818252	0.804334	0.811293	0.847561
		107.5	0.986264		0.82864	0.573895	0.758509	0.720348		0.816607	0.772401	0.794504	0.827076
		108	0.989823		0.830331	0.577898	0.780601	0.72961		0.822822	0.740649	0.781735	0.80685
		108.5	0.984347		0.774533	0.541507	0.77881	0.698283		0.812585	0.85539	0.833988	0.80538
		109	0.973942		0.803089	0.563342	0.783587	0.716673		0.816424	0.921601	0.869013	0.81981
		109.5	0.984758		0.799332	0.564797	0.751642	0.705257		0.813682	0.912039	0.862861	0.836899
		110	0.990645		0.815865	0.587724	0.822696	0.742095		0.814047	0.837349	0.825698	0.84789
		110.5	0.991056		0.803653	0.587724	0.851655	0.747677		0.811854	0.762839	0.787347	0.83623
		111	0.991192		0.804217	0.554244	0.780303	0.712921		0.808563	0.75418	0.781371	0.814319
		111.5	0.992014		0.784866	0.527314	0.749552	0.687244		0.814596	0.715752	0.765174	0.789898
		112	0.998585		0.787684	0.562614	0.730445	0.693581		0.814596	0.818767	0.816681	0.787643
		112.5	0.986811		0.796514	0.551696	0.744178	0.697463		0.817704	0.943251	0.880477	0.810926
		113	0.988454		0.820749	0.549877	0.784781	0.718469		0.808563	0.932065	0.870314	0.833162
		113.5	0.979829		0.785054	0.564433	0.764181	0.704556		0.812219	0.8949	0.85356	0.855258
		114	0.994341		0.77829	0.555699	0.754329	0.696106		0.807101	0.835906	0.821503	0.856464
		114.5	0.989276		0.80741	0.558975	0.772242	0.712876		0.814962	0.752015	0.783488	0.832216
		115	1.00173		0.80478	0.563705	0.749254	0.705913		0.810391	0.729283	0.769837	0.807097
		115.5	1.00598		0.790502	0.531317	0.742686	0.688168		0.811671	0.809025	0.810348	0.796294
		116	1.00078		0.808538	0.535684	0.801201	0.715141		0.817521	0.866576	0.842048	0.80143
		116.5	1.0016		0.797453	0.528406	0.786572	0.704144		0.813682	0.85106	0.832371	0.813651
		117	1.00269		0.768521	0.542234	0.776123	0.695626		0.809477	0.85088	0.830179	0.828736
		117.5	0.994204		0.792381	0.555335	0.738506	0.695407		0.818069	0.806679	0.812374	0.829243
		118	1.00187		0.801774	0.549149	0.753433	0.701452		0.809477	0.781782	0.79563	0.817638
		118.5	1.00269		0.775097	0.520763	0.728057	0.674639		0.80966	0.790983	0.800322	0.809626
		119	1.00639		0.790126	0.546965	0.753433	0.696842		0.816058	0.86423	0.840144	0.812118
		119.5	1.00885		0.771527	0.510938	0.729251	0.670572		0.812951	0.904462	0.858706	0.823701
		120	1.01337		0.789375	0.533864	0.771943	0.698394		0.813133	0.860261	0.836697	0.833968
		120.5	1.02542		0.795011	0.516396	0.759106	0.690171		0.806187	0.812633	0.80941	0.83624
		121	1.01871		0.808913	0.515669	0.749254	0.691279		0.80966	0.765365	0.787513	0.823082
		121.5	1.02364		0.777351	0.497109	0.734625	0.669695		0.804542	0.743716	0.774129	0.801937
		122	1.02323		0.783363	0.50839	0.729251	0.673668		0.807101	0.730726	0.768913	0.784991
		122.5	1.02597		0.783551	0.514213	0.723579	0.673781		0.806187	0.82887	0.817528	0.787021
		123	1.02268		0.791441	0.503295	0.72328	0.672672		0.818435	0.804514	0.811475	0.793011
		123.5	1.01967		0.775097	0.52513	0.761196	0.687141		0.811854	0.834643	0.823248	0.805291
		124	1.01625		0.782987	0.512757	0.751941	0.682562		0.813682	0.863509	0.838595	0.822712
		124.5	1.01939		0.763448	0.530225	0.730147	0.674607		0.811671	0.873792	0.842732	0.829012
		125	1.02898		0.774721	0.526222	0.731042	0.677328		0.80381	0.841859	0.822835	0.831853
		125.5	1.03226		0.756873	0.513485	0.739402	0.66992		0.807649	0.813535	0.810592	0.828689
		126	1.03623		0.785805	0.508026	0.733431	0.675754		0.817521	0.783767	0.800644	0.819201
		126.5	1.0413		0.768897	0.502932	0.710741	0.660856		0.813499	0.844746	0.829123	0.815798
		127	1.03829		0.774345	0.557519	0.708353	0.680072		0.80509	0.835365	0.820227	0.815146
		127.5	1.0324		0.775284	0.535684	0.707457	0.672808		0.815144	0.811911	0.813528	0.81588
		128	1.0335		0.76946	0.524039	0.727758	0.673752		0.807832	0.789901	0.798867	0.815436
		128.5	1.04075		0.753679	0.504751	0.707756	0.655395		0.810209	0.791164	0.800686	0.808327
		129	1.04883		0.75011	0.514941	0.717309	0.660786		0.81094	0.831035	0.820987	0.808517
		129.5	1.04445		0.765891	0.513121	0.734028	0.671013		0.80637	0.847272	0.826821	0.81184
		130	1.04062		0.741092	0.506935	0.732834	0.660287		0.803993	0.866937	0.835465	0.82099
		130.5	1.04637		0.73771	0.517488	0.712831	0.65601		0.814779	0.840957	0.827868	0.827785
		131	1.04308		0.742595	0.541143	0.715219	0.666319		0.805638	0.803973	0.804806	0.82374
		131.5	1.04664		0.733013	0.51858	0.781198	0.677597		0.810757	0.766989	0.788873	0.814253
		132	1.0554		0.746352	0.496745	0.780601	0.674566		0.812951	0.782143	0.797547	0.804773
		132.5	1.05006		0.726813	0.51676	0.782989	0.675521		0.805821	0.771499	0.78866	0.794971
		133	1.04691		0.715165	0.521127	0.760598	0.66563		0.805273	0.814617	0.809945	0.796256
		133.5	1.03952		0.746352	0.494561	0.738207	0.659707		0.808746	0.81137	0.810058	0.801553
		134	1.0402		0.736207	0.517488	0.726863	0.660186		0.831779	0.789901	0.81084	0.804876
		134.5	1.04048		0.711972	0.513121	0.689246	0.638113		0.80966	0.788819	0.799239	0.807521
		135	1.035		0.726813	0.521491	0.67611	0.641471		0.803993	0.800545	0.802269	0.805602
		135.5	1.03418		0.710844	0.505479	0.66775	0.628025		0.807832	0.776009	0.791921	0.801067
		136	1.02925		0.692245	0.501476	0.674617	0.622779		0.815876	0.831035	0.823455	0.804221
		136.5	1.04007		0.697318	0.520399	0.688051	0.635256		0.811488	0.909333	0.860411	0.819514
		137	1.03089		0.681912	0.509482	0.70059	0.630662		0.814413	0.859359	0.836886	0.828168
		137.5	1.03021		0.706711	0.527314	0.692828	0.642284		0.810026	0.805958	0.807992	0.832186
		138	1.0554		0.699572	0.510938	0.691037	0.633849		0.817521	0.757607	0.787564	0.823213
		138.5	1.05006		0.694875	0.509846	0.688947	0.631223		0.816241	0.731267	0.773754	0.801549
		139	1.04691		0.678155	0.516396	0.696411	0.630321		0.818069	0.769334	0.793702	0.790753
		139.5	1.03952		0.669137	0.520763	0.687753	0.625884		0.820811	0.845648	0.83323	0.797062
		140	1.0402		0.678155	0.50002	0.670437	0.616204		0.814779	0.844746	0.829762	0.807612
		140.5	1.04048		0.661622	0.522219	0.672228	0.61869		0.808563	0.849978	0.829271	0.821491
		141	1.035		0.674773	0.496017	0.656704	0.609165		0.811488	0.800726	0.806107	0.824592
		141.5	1.02925		0.677027	0.495289	0.686857	0.619725		0.820994	0.782324	0.801659	0.8167
		142	1.04007		0.671016	0.477457	0.714622	0.621032		0.817521	0.77619	0.796855	0.808473
		142.5	1.03089		0.694687	0.505115	0.695217	0.631673		0.810757	0.770597	0.790677	0.798825
		143	1.03021		0.678718	0.492742	0.694321	0.621927		0.798875	0.7982	0.798537	0.796932
		143.5	1.0554		0.691869	0.50839	0.685663	0.628641		0.814596	0.829772	0.822184	0.802063
					0.665004	0.514941	0.663869	0.614605		0.812585	0.824179	0.818382	0.807445
					0.66707	0.505843	0.654316	0.609076		0.808198	0.815159	0.811678	0.812695
					0.690554	0.529497	0.633119	0.617723		0.814047	0.777994	0.796021	0.812066
					0.667634	0.514941	0.654017	0.612197		0.807284	0.787375	0.797329	0.805853
					0.65561	0.512757	0.652823	0.607063		0.808198	0.788097	0.798147	0.800794
					0.660307	0.515669	0.676707	0.617561		0.812951	0.860803	0.836877	0.807094
					0.65824	0.514577	0.644762	0.60586		0.812219	0.839153	0.825686	0.81451
					0.648283	0.514577	0.649539	0.604133		0.812219	0.823999	0.818109	0.819705
					0.662561	0.513849	0.643867	0.606759		0.815693	0.776731	0.796212	0.819221
					0.655046	0.50002	0.673721	0.609596		0.813865	0.751113	0.782489	0.805624
					0.643023	0.516033	0.651629	0.603561		0.805638	0.718458	0.762048	0.789714
					0.63532	0.521127	0.636104	0.597517		0.811305	0.81119	0.811247	0.787999
					0.639265	0.512393	0.645956	0.599205		0.807832	0.782865	0.795349	0.787783
					0.627805	0.509118	0.672527	0.60315		0.808929	0.781602	0.795266	0.790977
					0.623296	0.521855	0.643568	0.59624		0.814047	0.778535	0.796291	0.799538
					0.638889	0.495653	0.637896	0.590813		0.80966	0.784308	0.796984	0.795972
					0.632502	0.492742	0.619087	0.581444		0.806735	0.790262	0.798499	0.79676
					0.617848	0.522583	0.612519	0.584317		0.813865	0.772942	0.793403	0.796294
					0.629872	0.511666	0.608041	0.583193		0.813499	0.777092	0.795295	0.796045
					0.618411	0.498201	0.613415	0.576676		0.804907	0.774927	0.789917	0.794279
					0.618787	0.508026	0.628044	0.584952		0.809843	0.763381	0.786612	0.791307
					0.623672	0.489831	0.625357	0.57962		0.807101	0.739927	0.773514	0.786335
					0.604697	0.50184	0.634014	0.580184		0.804359	0.769514	0.786937	0.784245
					0.624048	0.503295	0.619386	0.582243		0.813865	0.812092	0.812978	0.79001
					0.62123	0.466904	0.6164	0.568178		0.809295	0.844926	0.827111	0.800135
					0.62386	0.499656	0.656405	0.593307		0.813316	0.798741	0.806029	0.808264
					0.610333	0.492742	0.623864	0.575646		0.811123	0.731087	0.771105	0.804306
					0.610897	0.50184	0.608638	0.573791		0.812585	0.718278	0.765431	0.792419
					0.61146	0.478913	0.583261	0.557878		0.812037	0.706731	0.759384	0.775487
					0.596806	0.485828	0.566841	0.549825		0.812037	0.771499	0.791768	0.771922
					0.609581	0.483644	0.556392	0.549873		0.813682	0.836267	0.824974	0.785389
					0.600939	0.485828	0.580575	0.55578		0.814962	0.765545	0.790253	0.791595
					0.596618	0.498565	0.579977	0.558387		0.805821	0.778355	0.792088	0.799771
					0.6	0.47491	0.603264	0.559391		0.804724	0.730365	0.767545	0.793715
					0.601879	0.484008	0.579679	0.555189		0.812585	0.757607	0.785096	0.783746
					0.588164	0.464356	0.579082	0.543867		0.813316	0.825081	0.819199	0.790982
					0.582528	0.480733	0.588038	0.550433		0.840188	0.834823	0.837506	0.802336
					0.583843	0.490558	0.592516	0.555639		0.866878	0.78052	0.823699	0.816375
					0.584219	0.473454	0.593711	0.550461		0.829586	0.742814	0.7862	0.816651
					0.574074	0.463993	0.56923	0.535765		0.847318	0.720984	0.784151	0.807889
					0.596618	0.475274	0.576395	0.549429		0.861577	0.746602	0.804089	0.799535
					0.601879	0.485464	0.559378	0.548907		0.824467	0.761035	0.792751	0.791798
					0.596994	0.474182	0.54863	0.539935		0.817338	0.77637	0.796854	0.794461
					0.574825	0.454167	0.58565	0.538214		0.827758	0.790623	0.80919	0.800721
					0.576892	0.470543	0.566841	0.538092		0.832145	0.747143	0.789644	0.79711
					0.580649	0.471999	0.561766	0.538138		0.855178	0.737762	0.79647	0.79804
					0.588728	0.459262	0.554601	0.534197		0.823188	0.747865	0.785526	0.795208
					0.58234	0.458898	0.555198	0.532145		0.806735	0.794231	0.800483	0.793031
					0.581213	0.464356	0.557885	0.534485		0.810757	0.79369	0.802223	0.796176
					0.578395	0.461081	0.533106	0.524194		0.844576	0.805958	0.825267	0.803375
					0.573886	0.469087	0.547436	0.530136		0.799972	0.783767	0.791869	0.804961
					0.581025	0.459626	0.545346	0.528665		0.817338	0.762839	0.790089	0.802362
					0.576328	0.443977	0.539076	0.519794		0.823736	0.725133	0.774435	0.795415
					0.570692	0.450892	0.543256	0.521613		0.828855	0.713407	0.771131	0.781881
					0.572007	0.427237	0.56923	0.522825		0.814413	0.751834	0.783124	0.779694
					0.572195	0.428329	0.56087	0.520465		0.820628	0.763561	0.792095	0.780196
					0.550778	0.461809	0.545047	0.519211		0.828489	0.761035	0.794762	0.785278
					0.563365	0.459626	0.567438	0.530143		0.818618	0.715572	0.767095	0.784269
					0.559044	0.451256	0.552511	0.520937		0.821177	0.700237	0.760707	0.778665
					0.558105	0.44143	0.541166	0.513567		0.786627	0.730185	0.758406	0.770242
					0.546832	0.438882	0.534598	0.506771		0.831414	0.783045	0.80723	0.773359
					0.556789	0.446525	0.534598	0.512637		0.820811	0.74552	0.783166	0.777377
					0.560359	0.423598	0.528926	0.504294		0.830317	0.720082	0.775199	0.781
					0.549275	0.447616	0.519671	0.505521		0.816058	0.711602	0.76383	0.782356
					0.548899	0.420323	0.538778	0.502666		0.818618	0.742633	0.780625	0.775705
					0.545893	0.432332	0.538778	0.505668		0.828855	0.768071	0.798463	0.77953
					0.553032	0.43961	0.539972	0.510871		0.819714	0.777813	0.798764	0.785421
					0.556226	0.425781	0.523552	0.501853		0.830134	0.781241	0.805688	0.795885
					0.534433	0.41632	0.515491	0.488748		0.818618	0.753277	0.785948	0.797216
					0.547772	0.43306	0.496981	0.492604		0.827027	0.739386	0.783206	0.793401
					0.552093	0.44143	0.502654	0.498725		0.826295	0.724592	0.775444	0.787571
					0.53819	0.428329	0.489518	0.485346		0.831414	0.762298	0.796856	0.785363
					0.551153	0.441066	0.500265	0.497495		0.820811	0.788999	0.804905	0.790103
					0.534621	0.430148	0.502952	0.48924		0.830317	0.771319	0.800818	0.794506
					0.553596	0.430876	0.479964	0.488145		0.816058	0.744618	0.780338	0.795729
					0.553784	0.42287	0.506833	0.494496		0.818618	0.736319	0.777468	0.790882
					0.542135	0.426509	0.49728	0.488642		0.828855	0.783045	0.80595	0.791144
					0.53293	0.430512	0.525045	0.496162		0.819714	0.768252	0.793983	0.789435
					0.528421	0.438155	0.494294	0.486957		0.830134	0.717736	0.773935	0.787834
					0.529924	0.431968	0.484741	0.482211		0.832145	0.712144	0.772144	0.786503
					0.529924	0.427965	0.477576	0.478488		0.827027	0.724051	0.775539	0.7789
					0.535372	0.454895	0.479069	0.489778		0.820628	0.749669	0.785149	0.776692
					0.529736	0.429784	0.484442	0.481321		0.837081	0.755803	0.796442	0.782318
					0.524288	0.401399	0.476083	0.467257		0.817886	0.7457	0.781793	0.784731
					0.516209	0.4145	0.482651	0.47112		0.829586	0.717376	0.773481	0.784216
					0.527669	0.420323	0.490115	0.479369		0.829951	0.724051	0.777001	0.782179
					0.500992	0.437063	0.4931	0.477052		0.834704	0.784128	0.809416	0.785423
					0.52147	0.420687	0.490115	0.477424		0.823553	0.763561	0.793557	0.788364
					0.50644	0.405038	0.49937	0.470283		0.822822	0.757066	0.789944	0.79248
					0.525415	0.427965	0.493996	0.482459		0.820263	0.775107	0.797685	0.797651
					0.52053	0.4498	0.506236	0.492189		0.816424	0.752195	0.784309	0.791374
					0.525227	0.471271	0.510416	0.502305		0.831231	0.743174	0.787203	0.789785
					0.512827	0.427237	0.515491	0.485185		0.827941	0.721164	0.774552	0.785937
					0.504373	0.446889	0.510416	0.487226		0.823005	0.755984	0.789494	0.78389
					0.517524	0.423962	0.500862	0.480783		0.829403	0.747143	0.788273	0.784881
					0.509822	0.450528	0.496086	0.485478		0.825747	0.707814	0.76678	0.779775
					0.504937	0.44143	0.492802	0.479723		0.828123	0.712865	0.770494	0.778761
					0.510573	0.423962	0.523552	0.486029		0.821908	0.778174	0.800041	0.781397
					0.500804	0.434151	0.524149	0.486368		0.826295	0.745339	0.785817	0.780783
					0.503246	0.43124	0.502355	0.478947		0.826295	0.729644	0.777969	0.783581
					0.508319	0.448708	0.513999	0.490342		0.822639	0.714309	0.768474	0.783075
					0.498925	0.432696	0.474889	0.468837		0.821725	0.720623	0.771174	0.775859
					0.493665	0.437063	0.479964	0.470231		0.816972	0.711422	0.764197	0.770454
					0.483895	0.422506	0.485935	0.464112		0.822822	0.702582	0.762702	0.766637
					0.487465	0.430876	0.492205	0.470182		0.818252	0.760314	0.789283	0.771839
					0.49667	0.420323	0.459364	0.458786		0.820263	0.731628	0.775945	0.773032
					0.481829	0.41632	0.46444	0.454196		0.823188	0.729283	0.776235	0.776041
					0.474877	0.408677	0.460559	0.448038		0.822274	0.753277	0.787776	0.78231
					0.491974	0.434515	0.473993	0.466827		0.822456	0.782504	0.80248	0.785609
					0.485398	0.427965	0.448318	0.453894		0.812951	0.733973	0.773462	0.784988
					0.479198	0.413772	0.449512	0.447494		0.821908	0.718999	0.770454	0.783543
					0.490471	0.437063	0.451602	0.459712		0.823736	0.731809	0.777772	0.781042
					0.483332	0.422142	0.449512	0.451662		0.818983	0.734876	0.776929	0.774654
					0.468114	0.411589	0.469515	0.449739		0.814962	0.69735	0.756156	0.770328
					0.472811	0.425054	0.447124	0.448329		0.813865	0.699695	0.75678	0.766909
					0.469241	0.426145	0.433391	0.442926		0.828672	0.742453	0.785562	0.768857
					0.470932	0.417047	0.433092	0.440357		0.816058	0.769695	0.792877	0.772844
					0.463793	0.404674	0.449512	0.439327		0.815144	0.719901	0.767523	0.775685
					0.445006	0.42469	0.451304	0.440333		0.80509	0.721345	0.763217	0.777295
					0.459848	0.406494	0.444736	0.437026		0.808015	0.747865	0.77794	0.775389
					0.46229	0.406858	0.440257	0.436468		0.810209	0.75436	0.782284	0.772741
					0.453272	0.408677	0.425927	0.429292		0.812402	0.699695	0.756049	0.769873
					0.451393	0.41268	0.428614	0.430896		0.807832	0.720262	0.764047	0.77008
					0.45346	0.405402	0.432197	0.430353		0.80966	0.737221	0.773441	0.768955
					0.451018	0.427237	0.442944	0.4404		0.803262	0.720984	0.762123	0.763915
					0.440309	0.416684	0.436376	0.431123		0.831779	0.716654	0.774217	0.768457
					0.445194	0.435971	0.432794	0.437986		0.795401	0.71503	0.755216	0.766249
					0.446133	0.450892	0.438466	0.445164		0.817155	0.711242	0.764198	0.763938
					0.454211	0.405402	0.43757	0.432395		0.795584	0.71503	0.755307	0.762235
					0.45083	0.422506	0.422046	0.431794		0.843113	0.730185	0.786649	0.765343
					0.445569	0.413408	0.401148	0.420042		0.834339	0.695546	0.764942	0.767774
					0.437491	0.398488	0.372487	0.402822		0.825381	0.725314	0.775348	0.770562
					0.436364	0.409769	0.379652	0.408595		0.822456	0.717195	0.769826	0.774191
					0.445569	0.427965	0.373084	0.41554		0.820446	0.689953	0.755199	0.766329
					0.446321	0.397032	0.368009	0.403787		0.820994	0.713226	0.76711	0.766871
					0.441436	0.405038	0.36174	0.402738		0.82593	0.731628	0.778779	0.767729
					0.44106	0.387206	0.374876	0.401047		0.814047	0.716654	0.765351	0.76661
					0.438994	0.420323	0.388012	0.415776		0.828306	0.693922	0.761114	0.768088
					0.428285	0.401399	0.382041	0.403908		0.823736	0.677685	0.750711	0.763989
					0.432418	0.394121	0.397267	0.407935		0.822639	0.715211	0.768925	0.761525
					0.442939	0.403219	0.391594	0.412584		0.833425	0.736138	0.784782	0.766383
					0.439933	0.395212	0.423539	0.419561		0.830683	0.683819	0.757251	0.765417
					0.428285	0.409041	0.436376	0.424568		0.829586	0.67101	0.750298	0.765314
					0.436739	0.386115	0.462648	0.428501		0.827392	0.70168	0.764536	0.764217
					0.432043	0.377745	0.45608	0.421956		0.82922	0.699154	0.764187	0.759068
					0.425843	0.369374	0.466231	0.420483		0.832694	0.680933	0.756813	0.758959
					0.420958	0.399579	0.455185	0.425241		0.828489	0.660366	0.744427	0.757491
					0.433921	0.375561	0.465932	0.425138		0.837812	0.661268	0.74954	0.753742
					0.430164	0.373014	0.468321	0.423833		0.829951	0.687427	0.758689	0.752367
					0.430727	0.374469	0.453991	0.419729		0.833242	0.661448	0.747345	0.75
					0.427534	0.388662	0.419956	0.412051		0.833608	0.678587	0.756097	0.752918
					0.431667	0.367919	0.417866	0.405817		0.831414	0.715572	0.773493	0.758906
					0.424903	0.362096	0.400551	0.39585		0.8305	0.697711	0.764105	0.76026
					0.424716	0.351179	0.400551	0.392148		0.830317	0.681835	0.756076	0.762443
					0.422461	0.357001	0.401446	0.393636		0.832876	0.672092	0.752484	0.76154
					0.428097	0.355182	0.39458	0.39262		0.821177	0.678587	0.749882	0.755637
					0.425091	0.357729	0.388012	0.390277		0.835801	0.671732	0.753766	0.753052
					0.420958	0.357365	0.392191	0.390172		0.82465	0.668304	0.746477	0.750652
					0.424528	0.361004	0.381145	0.388892		0.829951	0.639799	0.734875	0.74625
					0.42077	0.340625	0.382041	0.381145		0.820811	0.65369	0.737251	0.743092
					0.415134	0.361732	0.376667	0.384511		0.826478	0.676061	0.75127	0.742468
					0.411189	0.328616	0.373084	0.370963		0.819166	0.662531	0.740848	0.741061
					0.418704	0.358093	0.376368	0.384388		0.8188	0.646835	0.732818	0.740547
					0.421898	0.381748	0.35547	0.386372		0.823919	0.673716	0.748817	0.743438
					0.414571	0.351907	0.36174	0.376072		0.820628	0.644309	0.732469	0.738738
					0.42077	0.343173	0.37189	0.378611		0.832694	0.64485	0.738772	0.738219
					0.413255	0.329708	0.367412	0.370125		0.826661	0.665237	0.745949	0.741502
					0.416261	0.344264	0.370994	0.377173		0.827575	0.648639	0.738107	0.738824
					0.418516	0.33735	0.36771	0.374525		0.828306	0.641783	0.735045	0.739468
					0.425091	0.327524	0.350992	0.367869		0.821908	0.667582	0.744745	0.740961
					0.414946	0.330435	0.364426	0.369936		0.8305	0.656757	0.743629	0.740381
					0.400104	0.317335	0.354873	0.357437		0.829586	0.630959	0.730272	0.738423
					0.401983	0.319518	0.362038	0.36118		0.828123	0.657479	0.742801	0.740362
					0.404613	0.298775	0.343528	0.348972		0.832694	0.646294	0.739494	0.739049
					0.396159	0.311148	0.35756	0.354956		0.825381	0.651706	0.738544	0.737778
					0.407056	0.300594	0.371592	0.359747		0.826844	0.643587	0.735216	0.739013
					0.407244	0.293316	0.382041	0.360867		0.826661	0.636732	0.731696	0.736237
					0.405553	0.28713	0.355171	0.349285		0.834704	0.665598	0.750151	0.738902
					0.405553	0.290769	0.367412	0.354578		0.825747	0.647196	0.736471	0.738384
					0.398977	0.292224	0.354873	0.348691		0.822456	0.652969	0.737713	0.739008
					0.398601	0.275848	0.35547	0.343307		0.823553	0.653871	0.738712	0.740762
					0.395595	0.267842	0.363232	0.342223		0.829037	0.633304	0.731171	0.736017
					0.399729	0.252558	0.363232	0.338506		0.828672	0.646835	0.737753	0.736337
					0.39259	0.273301	0.37189	0.345927		0.830317	0.633124	0.73172	0.734839
					0.410062	0.267842	0.362934	0.346946		0.831962	0.650082	0.741022	0.735417
					0.393717	0.263839	0.347111	0.334889		0.827941	0.643407	0.735674	0.736542
					0.388268	0.256925	0.354276	0.333156		0.831414	0.656938	0.744176	0.738148
					0.390523	0.264203	0.358157	0.337628		0.823188	0.632582	0.727885	0.737189
					0.399165	0.264203	0.355769	0.339712		0.824833	0.650082	0.737458	0.736298
					0.392777	0.231086	0.343827	0.322564		0.833608	0.635108	0.734358	0.735969
					0.389959	0.235453	0.345618	0.323677		0.828672	0.624644	0.726658	0.73159
					0.381881	0.23509	0.339946	0.318972		0.828855	0.652969	0.740912	0.734846
					0.382444	0.223444	0.349798	0.318562		0.833059	0.633665	0.733362	0.733822
					0.379251	0.23327	0.339946	0.317489		0.8305	0.612917	0.721709	0.73066
					0.389959	0.23327	0.349798	0.324342		0.837264	0.626268	0.731766	0.731937
					0.378311	0.208888	0.338154	0.308451		0.834156	0.641422	0.737789	0.731156
					0.37756	0.204521	0.334273	0.305451		0.827575	0.614902	0.721238	0.728126
					0.37493	0.215438	0.327407	0.305925		0.8305	0.624825	0.727662	0.729614
					0.371548	0.20634	0.339349	0.305746		0.831962	0.630057	0.731009	0.729425
					0.378499	0.179047	0.348305	0.30195		0.826295	0.620675	0.723485	0.725849
					0.368918	0.191784	0.348305	0.303002		0.831414	0.627711	0.729563	0.72793
					0.371172	0.208888	0.337557	0.305872		0.828855	0.60083	0.714842	0.724725
					0.373239	0.189236	0.342931	0.301802		0.824467	0.600469	0.712468	0.72009
					0.367603	0.19142	0.337557	0.29886		0.837081	0.615263	0.726172	0.720761
					0.373614	0.182322	0.345319	0.300419		0.823919	0.615984	0.719952	0.718358
					0.371736	0.187417	0.342334	0.300495		0.833425	0.611294	0.722359	0.720238
					0.367978	0.17104	0.327705	0.288908		0.827758	0.607505	0.717631	0.721529
					0.361966	0.174316	0.333975	0.290086		0.822274	0.608768	0.715521	0.718866
					0.376245	0.160487	0.312181	0.282971		0.827758	0.592351	0.710054	0.716391
					0.369857	0.171404	0.316659	0.285973		0.828123	0.596861	0.712492	0.713925
					0.375681	0.141563	0.321137	0.27946		0.830865	0.586036	0.708451	0.711629
					0.375681	0.155392	0.323526	0.284866		0.831414	0.608046	0.71973	0.712682
					0.373051	0.160851	0.311882	0.281928		0.819532	0.585675	0.702603	0.710819
					0.366475	0.173588	0.314569	0.284877		0.834339	0.586217	0.710278	0.710266
					0.361591	0.141563	0.313673	0.272276		0.827027	0.579361	0.703194	0.708951
					0.36779	0.151389	0.30621	0.27513		0.829037	0.590186	0.709612	0.706422
					0.360463	0.13101	0.295164	0.262212		0.828855	0.581887	0.705371	0.707113
					0.358209	0.130282	0.308897	0.265796		0.833242	0.579722	0.706482	0.706164
					0.371736	0.125551	0.294566	0.263951		0.835984	0.568175	0.70208	0.705886
					0.364972	0.147386	0.290685	0.267681		0.826295	0.559877	0.693086	0.701755
					0.361027	0.131737	0.294865	0.262543		0.827027	0.562583	0.694805	0.699113
					0.360651	0.0964377	0.308897	0.255329		0.827209	0.547428	0.687319	0.694322
					0.354076	0.0986212	0.292477	0.248391		0.834522	0.554284	0.694403	0.692403
					0.355203	0.105172	0.284714	0.248363		0.830865	0.567634	0.69925	0.693944
					0.350318	0.107719	0.285311	0.247783		0.826661	0.555547	0.691104	0.693019
					0.352197	0.0946181	0.284714	0.243843		0.826844	0.53931	0.683077	0.691958
					0.356894	0.0913428	0.272773	0.240336		0.82465	0.540031	0.682341	0.688943
					0.349003	0.0884315	0.275758	0.237731		0.827758	0.541114	0.684436	0.685239
					0.3537	0.0767862	0.288894	0.239793		0.835618	0.525418	0.680518	0.682593
					0.349379	0.0796975	0.275161	0.234746		0.83379	0.547067	0.690429	0.684431
					0.347312	0.0960738	0.265309	0.236232		0.820263	0.524155	0.672209	0.681898
					0.3475	0.0884315	0.264413	0.233448		0.827027	0.535341	0.681184	0.681085
					0.34487	0.0804254	0.258741	0.228012		0.833608	0.527944	0.680776	0.681149
					0.352197	0.0829728	0.262622	0.232597		0.834156	0.53949	0.686823	0.680248
					0.35727	0.082245	0.267996	0.235837		0.825381	0.518743	0.672062	0.680211
					0.364972	0.0826089	0.262323	0.236635		0.840006	0.52632	0.683163	0.680706
					0.350694	0.0771501	0.262025	0.229956		0.831231	0.510805	0.671018	0.678266
					0.346937	0.0753306	0.255755	0.226008		0.821542	0.51297	0.667256	0.673375
					0.344119	0.069144	0.25486	0.222707		0.834887	0.496191	0.665539	0.671744
					0.348815	0.0574987	0.235454	0.213923		0.821177	0.505212	0.663194	0.666752
					0.34224	0.0709636	0.23844	0.217214		0.820263	0.507016	0.663639	0.664907
					0.33341	0.0385751	0.240529	0.204171		0.82465	0.507738	0.666194	0.664642
					0.332658	0.0513121	0.240529	0.208167		0.84092	0.52632	0.68362	0.669162
					0.338295	0.0447616	0.238738	0.207265		0.828489	0.501784	0.665137	0.669647
					0.334349	0.0462173	0.248889	0.209818		0.827209	0.493485	0.660347	0.668824
					0.332846	0.0531317	0.255755	0.213911		0.828123	0.509722	0.668923	0.669507
					0.332846	0.0443977	0.237842	0.205029		0.825564	0.507738	0.666651	0.665264
					0.327022	0.0283854	0.258741	0.204716		0.825381	0.496913	0.661147	0.664267
					0.334725	0.0443977	0.259636	0.21292		0.829769	0.51297	0.671369	0.667022
					0.330028	0.0327524	0.247993	0.203591		0.827941	0.505392	0.666666	0.666458
					0.332471	0.0425781	0.23635	0.203799		0.828672	0.512609	0.67064	0.667456
					0.324016	0.0138288	0.250381	0.196076		0.827392	0.505212	0.666302	0.668744
					0.315186	0.0203793	0.243515	0.193027		0.830317	0.49583	0.663074	0.666671
					0.325895	0.0178319	0.231573	0.191767		0.829951	0.501964	0.665958	0.666494
					0.321198	-0.00145566	0.236648	0.185464		0.824285	0.49998	0.662132	0.664367
					0.311992	0.00509482	0.233961	0.183683		0.827758	0.497093	0.662426	0.663397
					0.317253	-0.000727831	0.225304	0.18061		0.83379	0.493666	0.663728	0.663561
					0.321198	-0.0116453	0.237842	0.182465		0.829586	0.497995	0.663791	0.663019
					0.319883	-0.00436699	0.233364	0.18296		0.830865	0.494026	0.662446	0.663098
					0.318568	-0.00727831	0.215451	0.17558		0.833425	0.489877	0.661651	0.662904
					0.314623	-0.000727831	0.233961	0.182619		0.82922	0.499619	0.66442	0.663077
					0.305605	-0.034572	0.229483	0.166839		0.831231	0.500882	0.666057	0.663643
					0.312556	-0.0265658	0.240828	0.175606		0.833059	0.49114	0.662099	0.663557
					0.309362	-0.0265658	0.208585	0.163794		0.829403	0.478872	0.654137	0.661678
					0.307296	-0.017104	0.208286	0.166159		0.826295	0.478331	0.652313	0.658652
					0.304102	-0.0309328	0.219631	0.164267		0.827209	0.493846	0.660528	0.657269
					0.304853	-0.0374833	0.235753	0.167708		0.834339	0.483202	0.65877	0.656437
					0.30429	-0.0378472	0.222915	0.163119		0.828123	0.483382	0.655753	0.656841
					0.300157	-0.0447616	0.225901	0.160432		0.827758	0.474181	0.650969	0.656505
					0.298654	-0.0331163	0.219333	0.161623		0.823553	0.50449	0.664022	0.657379
					0.298654	-0.0636853	0.215451	0.15014		0.832876	0.461913	0.647395	0.654535
					0.296963	-0.0484008	0.212167	0.153576		0.831597	0.466063	0.64883	0.652804
					0.289636	-0.0589543	0.228886	0.153189		0.826113	0.476526	0.65132	0.652891
					0.291702	-0.0607739	0.219034	0.149987		0.831779	0.457583	0.644681	0.648056
					0.293769	-0.0727831	0.210973	0.143986		0.827941	0.451449	0.639695	0.646131
					0.285878	-0.0607739	0.207689	0.144265		0.825199	0.452171	0.638685	0.643595
					0.287193	-0.0716914	0.202017	0.139173		0.828672	0.443511	0.636092	0.639788
					0.28926	-0.0651409	0.193658	0.139259		0.831597	0.458846	0.645221	0.639923
					0.283248	-0.0680522	0.208286	0.141161		0.830683	0.45596	0.643321	0.64083
					0.274606	-0.0738749	0.203211	0.134647		0.826661	0.451088	0.638875	0.640877
					0.288884	-0.0793336	0.205898	0.138483		0.834887	0.451991	0.643439	0.642714
					0.290011	-0.0837006	0.199628	0.135313		0.831597	0.439903	0.63575	0.640346
					0.290763	-0.073511	0.199628	0.13896		0.832876	0.435032	0.633954	0.638004
					0.284375	-0.0953459	0.196046	0.128358		0.834156	0.444233	0.639194	0.638084
					0.28569	-0.086248	0.190672	0.130038		0.819349	0.441346	0.630348	0.634811
					0.281745	-0.0811532	0.199031	0.133208		0.829037	0.434851	0.631944	0.63386
					0.284375	-0.124459	0.190971	0.116962		0.833059	0.418975	0.626017	0.631876
					0.293205	-0.101169	0.176043	0.122693		0.833059	0.429078	0.631069	0.629844
					0.278927	-0.101169	0.177237	0.118332		0.827027	0.43431	0.630668	0.629925
					0.28926	-0.120456	0.175446	0.11475		0.834339	0.433228	0.633783	0.630384
					0.278176	-0.124459	0.174551	0.109422		0.823919	0.424207	0.624063	0.629896
					0.275921	-0.113906	0.176939	0.112985		0.828306	0.422042	0.625174	0.628422
					0.280806	-0.116089	0.170371	0.111696		0.825564	0.427455	0.626509	0.627382
					0.280618	-0.100441	0.173655	0.117944		0.829403	0.424027	0.626715	0.625615
					0.282497	-0.101896	0.163803	0.114801		0.830865	0.42529	0.628078	0.626619
					0.2716	-0.11427	0.150965	0.102765		0.830134	0.420238	0.625186	0.626622
					0.279491	-0.0997129	0.159325	0.113034		0.831414	0.400573	0.615994	0.623993
					0.27517	-0.125915	0.161414	0.103556		0.819714	0.411398	0.615556	0.621203
					0.267843	-0.102988	0.154846	0.106567		0.836715	0.41248	0.624598	0.620333
					0.273855	-0.110266	0.162907	0.108832		0.826478	0.409413	0.617946	0.618523
					0.271224	-0.139016	0.161414	0.0978743		0.826844	0.395883	0.611363	0.617366
					0.268406	-0.144475	0.163504	0.095812		0.823371	0.398228	0.610799	0.616177
					0.272539	-0.190328	0.1438	0.0753372		0.821542	0.396424	0.608983	0.612273
					0.269158	-0.194695	0.1438	0.0727543		0.832328	0.397145	0.614737	0.611471
					0.270849	-0.195059	0.144397	0.0733957		0.831597	0.397506	0.614552	0.612268
					0.268782	-0.23145	0.148577	0.0619695		0.826113	0.394981	0.610547	0.612204
					0.267091	-0.222353	0.155444	0.0667274		0.824285	0.389027	0.606656	0.611623
					0.267091	-0.210343	0.142606	0.0664513		0.823919	0.38145	0.602684	0.60861
					0.263522	-0.227447	0.140218	0.0587639		0.826478	0.393898	0.610188	0.607519
					0.267091	-0.252194	0.132455	0.0491176		0.820446	0.393357	0.606901	0.606607
					0.264837	-0.240184	0.1438	0.0561508		0.826295	0.39462	0.610458	0.607558
					0.252249	-0.246007	0.139023	0.0484219		0.827758	0.362687	0.595222	0.605692
					0.260891	-0.260928	0.132455	0.0441397		0.827758	0.303692	0.565725	0.594577
					0.257698	-0.260564	0.140218	0.0457838		0.832876	0.235317	0.534096	0.576375
					0.262394	-0.276212	0.14798	0.0447207		0.827209	0.190935	0.509072	0.551029
					0.254504	-0.269662	0.132455	0.0390992		0.83635	0.173075	0.504712	0.528402
					0.257698	-0.272209	0.137829	0.0411059		0.820811	0.170729	0.49577	0.510913
					0.235341	-0.299139	0.13365	0.0232839		0.827209	0.162611	0.49491	0.501116
					0.23102	-0.287857	0.128873	0.0240117		0.825564	0.147637	0.4866	0.495498
					0.225759	-0.273665	0.115737	0.0226105		0.831597	0.137353	0.484475	0.490439
					0.21073	-0.289313	0.124096	0.0151709		0.836167	0.146554	0.49136	0.489336
					0.190252	-0.30023	0.127977	0.00599941		0.828123	0.129235	0.478679	0.485279
					0.179167	-0.312604	0.12738	-0.00201881		0.82593	0.123461	0.474696	0.482303
					0.147041	-0.322793	0.128873	-0.0156265
					0.148544	-0.322065	0.113647	-0.0199582
					0.125436	-0.322065	0.111557	-0.0283575
					0.111533	-0.308601	0.0972268	-0.0332802
					0.102328	-0.336258	0.102004	-0.0439757
					0.0773406	-0.347176	0.0963312	-0.0578346
