# Supplementary material for: Fluidics system for resolving concentration-dependent effects of dissolved gases on tissue metabolism
Source: eLife. 2021 Nov 4;10:e66716. doi: 10.7554/eLife.66716 (PMC8660022; doi:10.7554/eLife.66716)
Supplement: Appendix 1—figure 3—source data 1. [file elife-66716-app1-fig3-data1.xlsx]

## Sheet: Appendix Fig. 3
Time	ng/ml, H2Sg	H2S, aq mM		Time, min	OCR, nmol/mg liver/min			Time, min	Cvt c, % red	Cvt c ox, % red			Time, min	LPR, nmol/min/mg liver			adjusted time	Pyruvate, nmol/mg/min
0	0	0		-8.50167	0.34121			-33.4333					-10	0.2349			-15	0.051026
1	471.429	0.0271061		-8.25167	0.34218			-32.9333					5	0.2336			0	0.051432
2	942.857	0.0542123		-8.00333	0.34498			-32.4					20	0.2413			15	0.055402
3	1414.29	0.0813184		-7.75333	0.34286			-31.8833					35	0.2647			30	0.066227
4	1885.71	0.108425		-7.50333	0.34262			-31.3667	98.3497	34.7677			50	0.2838			45	0.070792
5	2357.14	0.135531		-7.25333	0.34677			-30.85	98.2115	34.4715			65	0.334			60	0.07898
6	2828.57	0.162637		-7.00333	0.34882			-30.3333	98.0178	34.1613			80	0.3302			75	0.083112
7	3300	0.189743		-6.75333	0.34573			-29.8167	97.8143	34.1911			95	0.3331			90	0.079819
8	3771.43	0.216849		-6.50333	0.3486			-29.3	97.6225	33.955			110	0.3002			105	0.077724
9	4242.86	0.243955		-6.25333	0.34833			-28.7833	97.5994	33.9838			125	0.2568			120	0.072944
10	4714.29	0.271061		-6.00333	0.34822			-28.25	97.4252	33.8787			140	0.2149			135	0.0683775
11	5185.71	0.298167		-5.75333	0.34949			-27.7333	97.322	33.8144			155	0.1993			150	0.063811
12	5657.14	0.325274		-5.50333	0.34967			-27.2167	97.2067	33.4243
13	6128.57	0.35238		-5.25333	0.34979			-26.7	96.8392	33.1858
14	6600	0.379486		-5.00167	0.34917			-26.1833	96.889	32.9836
15	7071.43	0.406592		-4.75333	0.34882			-25.65	96.9503	32.6929
16	7542.86	0.433698		-4.50167	0.34553			-25.1333	96.7741	32.4058
17	8014.29	0.460804		-4.25333	0.34687			-24.6167	96.777	32.0889
18	8485.71	0.48791		-4.00333	0.35017			-24.1	96.6928	32.0837
19	8957.14	0.515016		-3.75333	0.34729			-23.5833	96.3061	31.7974
20	9428.57	0.542123		-3.50333	0.34927			-23.0667	96.0336	31.5579
21	9900	0.569229		-3.25333	0.34933			-22.55	95.8004	31.2237
22	10371.4	0.596335		-3.00333	0.35235			-22.0333	95.553	31.1689
23	10842.9	0.623441		-2.75333	0.35172			-21.5	95.4777	31.0181
24	11314.3	0.650547		-2.50333	0.35029			-20.9833	95.1154	30.7454
25	11785.7	0.677653		-2.25333	0.35594			-20.4667	94.7898	30.6873
26	12257.1	0.704759		-2.00333	0.35643			-19.95	94.9086	30.5859
27	12728.6	0.731866		-1.75333	0.35005			-19.4333	94.6731	30.3499
28	13200	0.758972		-1.50333	0.35911			-18.9167	94.4501	30.1068
29	13671.4	0.786078		-1.25333	0.35792			-18.3833	94.4628	29.8882
30	14142.9	0.813184		-1.00167	0.35609			-17.8667	94.5582	29.672
31	14614.3	0.84029		-0.753333	0.35641			-17.35	94.7624	29.5253
32	15085.7	0.867396		-0.503333	0.35666			-16.8333	94.7828	29.2658
33	15557.1	0.894502		-0.253333	0.35264			-16.3167	94.8625	29.0888
34	16028.6	0.921608		-0.00333333	0.35674			-15.7833	95.0732	28.9675
35	16500	0.948715		0.248333	0.35954			-15.2667	95.4275	28.6427
36	16971.4	0.975821		0.498333	0.36096			-14.75	95.2483	28.5541
37	17442.9	1.00293		0.746667	0.35653			-14.2333	95.1496	28.3963
38	17914.3	1.03003		0.996667	0.35692			-13.7167	95.2763	28.1032
39	18385.7	1.05714		1.24667	0.35668			-13.2	95.043	27.8509
40	18857.1	1.08425		1.49667	0.35473			-12.6833	94.8514	27.6872
41	19328.6	1.11135		1.74667	0.3571			-12.15	94.5159	27.3974
42	19800	1.13846		1.99667	0.35741			-11.6333	94.5922	27.4163
43	20271.4	1.16556		2.24667	0.35808			-11.1167	94.6315	27.3737
44	20742.9	1.19267		2.49667	0.35494			-10.6	94.7979	27.4346
45	21214.3	1.21978		2.74667	0.35656			-10.0667	94.8229	27.5494
46	21685.7	1.24688		2.99667	0.35537			-9.55	95.0654	27.5638
47	22157.1	1.27399		3.24667	0.35651			-9.03333	95.5558	27.7046
48	22628.6	1.30109		3.49667	0.35697			-8.51667	95.8377	27.9038
49	23100	1.3282		3.74667	0.35513			-8	96.2765	28.1358
50	23571.4	1.35531		3.99667	0.3535			-7.48333	96.8	28.4059
51	24042.9	1.38241		4.24667	0.35409			-6.96667	97.4569	28.7588
52	24514.3	1.40952		4.49667	0.35325			-6.43333	97.6907	28.7341
53	24985.7	1.43662		4.74667	0.35422			-5.91667	98.0061	28.6975
54	25457.1	1.46373		4.99667	0.35453			-5.4	97.9985	28.6615
55	25928.6	1.49084		5.24667	0.35335			-4.88333	98.2372	28.8545
56	26400	1.51794		5.49667	0.35529			-4.36667	98.2793	28.9492
57	26871.4	1.54505		5.74667	0.34879			-3.85	98.4001	29.034
58	27342.9	1.57216		5.99667	0.35376			-3.33333	98.4502	29.1982
59	27814.3	1.59926		6.24667	0.35092			-2.81667	98.6749	29.2921
60	28285.7	1.62637		6.49667	0.35384			-2.3	98.7078	29.1488
61	28757.1	1.65347		6.74667	0.35094			-1.76667	98.7126	29.0772
62	29228.6	1.68058		6.99667	0.35469			-1.25	98.625	29.285
63	29700	1.70769		7.24667	0.35176			-0.733333	98.6197	29.3363
64	30171.4	1.73479		7.49667	0.35427			-0.216667	98.7651	29.2794
65	30642.9	1.7619		7.74667	0.35286			0.3	98.7366	29.2179
66	31114.3	1.789		7.99667	0.35093			0.833333	98.7927	29.1005
67	31585.7	1.81611		8.24667	0.35027			1.35	98.5754	28.9658
68	32057.1	1.84322		8.49667	0.35117			1.86667	98.4979	28.7377
69	32528.6	1.87032		8.74667	0.34963			2.38333	98.2424	28.6198
70	33000	1.89743		8.99667	0.35278			2.9	98.1279	28.7103
71	33471.4	1.92454		9.24667	0.35043			3.41667	97.8171	28.8412
72	33942.9	1.95164		9.49667	0.35245			3.95	97.777	28.7354
73	34414.3	1.97875		9.74667	0.35116			4.46667	97.737	28.7969
74	34885.7	2.00585		9.99667	0.34731			4.98333	97.5247	28.7491
75	35357.1	2.03296		10.2467	0.34777			5.5	97.4388	28.8243
76	35828.6	2.06007		10.4967	0.35407			6.01667	97.447	28.9314
77	36300	2.08717		10.7467	0.34628			6.53333	97.6051	29.0055
78	36771.4	2.11428		10.9967	0.35247			7.06667	97.4282	29.126
79	37242.9	2.14138		11.2467	0.35094			7.58333	97.5255	29.1264
80	37714.3	2.16849		11.4967	0.34697			8.1	97.648	28.949
81	38185.7	2.1956		11.7467	0.34956			8.61667	97.5451	28.8369
82	38657.1	2.2227		11.9967	0.34804			9.13333	97.4961	28.6636
83	39128.6	2.24981		12.2467	0.35197			9.65	97.3448	28.5701
84	39600	2.27691		12.4967	0.34881			10.1667	97.4059	28.5281
85	40071.4	2.30402		12.7467	0.34901			10.7	97.3675	28.237
86	40542.9	2.33113		12.9967	0.34563			11.2167	97.3166	28.1356
87	41014.3	2.35823		13.2467	0.34807			11.7333	97.3882	28.118
88	41485.7	2.38534		13.4967	0.34909			12.25	97.4028	28.038
89	41957.1	2.41245		13.7467	0.34956			12.7667	97.4484	27.9741
90	42428.6	2.43955		13.9967	0.34672			13.3	97.3855	27.9845
91	21214.3	1.21978		14.2467	0.34544			13.8167	97.5445	27.8092
92	10607.1	0.609888		14.4967	0.34828			14.3333	97.4844	27.8945
93	5303.57	0.304944		14.7467	0.34816			14.85	97.5588	27.9375
94	2651.79	0.152472		14.9967	0.34461			15.3667	97.4893	28.014
95	1325.89	0.076236		15.2467	0.3452			15.8833	97.4198	27.9332
96	662.946	0.038118		15.4967	0.34681			16.4	97.2219	27.9492
97	331.473	0.019059		15.7467	0.34531			16.9333	97.0661	27.833
98	165.737	0.0095295		15.9967	0.34551			17.45	97.0312	27.8679
99	82.8683	0.00476475		16.2467	0.34549			17.9667	96.8992	27.8734
100	41.4342	0.00238237		16.4967	0.34332			18.4833	96.5814	27.8881
101	20.7171	0.00119119		16.7467	0.34532			19	96.5034	27.6644
102	10.3585	0.000595594		16.9967	0.34242			19.5333	96.5263	27.5205
103	5.17927	0.000297797		17.2467	0.34439			20.05	96.6595	27.4992
104	2.58963	0.000148898		17.4967	0.34769			20.5667	96.5511	27.4185
105	1.29482	7.44492e-05		17.7467	0.3439			21.0833	96.5375	27.5661
106	0.647409	3.72246e-05		17.9967	0.34408			21.6	96.604	27.2664
107	0.323704	1.86123e-05		18.2467	0.34125			22.1167	96.5527	27.1636
108	0.161852	9.30615e-06		18.4967	0.34669			22.65	96.7759	26.9497
109	0.0809261	4.65308e-06		18.7467	0.34705			23.1667	96.6505	26.832
110	0.040463	2.32654e-06		18.9967	0.34571			23.6833	96.9308	26.8226
111	0.0202315	1.16327e-06		19.2467	0.34697			24.2	96.958	27.0556
112	0.0101158	5.81634e-07		19.4967	0.34594			24.7167	97.1574	27.0382
113	0.00505788	2.90817e-07		19.7467	0.34362			25.2333	97.1058	27.0716
114	0.00252894	1.45409e-07		19.9967	0.34596			25.7667	96.9242	26.9523
115	0.00126447	7.27043e-08		20.2467	0.34281			26.2833	96.6753	26.8708
116	0.000632235	3.63522e-08		20.4967	0.34554			26.8	96.3248	26.9886
117	0.000316117	1.81761e-08		20.7467	0.34429			27.3167	96.0949	26.9957
118	0.000158059	9.08804e-09		20.9967	0.34267			27.8333	95.7209	27.0221
119	7.90294e-05	4.54402e-09		21.2467	0.34251			28.35	95.6945	27.1046
120	3.95147e-05	2.27201e-09		21.4967	0.34495			28.8667	95.6072	26.9922
121	1.97573e-05	1.136e-09		21.7467	0.34611			29.4	95.619	26.7966
122	9.87867e-06	5.68002e-10		21.9967	0.34553			29.9167	95.2291	26.6349
123	4.93934e-06	2.84001e-10		22.2467	0.34779			30.4333	94.9615	26.5442
124	2.46967e-06	1.42001e-10		22.4967	0.34625			30.95	95.1378	26.6572
125	1.23483e-06	7.10003e-11		22.7467	0.35098			31.4833	95.1917	26.6573
126	6.17417e-07	3.55001e-11		22.9967	0.34828			32	95.506	26.7111
127	3.08708e-07	1.77501e-11		23.2467	0.34667			32.5167	95.7609	26.7978
128	1.54354e-07	8.87504e-12		23.4967	0.34842			33.0333	96.0708	26.8563
129	7.71771e-08	4.43752e-12		23.7467	0.3488			33.55	96.1175	26.8844
130	3.85886e-08	2.21876e-12		23.9967	0.34819			34.0833	96.2586	27.1581
131	1.92943e-08	1.10938e-12		24.2467	0.34769			34.6	96.1257	27.1235
132	9.64714e-09	5.5469e-13		24.4967	0.35313			35.1167	96.193	27.3222
133	4.82357e-09	2.77345e-13		24.7467	0.34965			35.6333	96.2606	27.2468
134	2.41179e-09	1.38672e-13		24.9967	0.34463			36.15	96.3293	27.2676
135	1.20589e-09	6.93362e-14		25.2467	0.35193			36.6667	96.6705	27.3189
136	6.02946e-10	3.46681e-14		25.4967	0.35178			37.2	96.7658	27.2772
137	3.01473e-10	1.73341e-14		25.7467	0.34982			37.7167	96.6574	27.2516
138	1.50737e-10	8.66703e-15		25.9967	0.35002			38.2333	96.6269	27.2573
139	7.53683e-11	4.33351e-15		26.2467	0.35235			38.75	96.9632	27.2161
140	3.76841e-11	2.16676e-15		26.4967	0.35437			39.2667	96.6352	26.9192
141	1.88421e-11	1.08338e-15		26.7467	0.35581			39.8	96.3874	26.8689
142	9.42104e-12	5.41689e-16		26.9967	0.35366			40.3167	96.4817	26.4828
143	4.71052e-12	2.70845e-16		27.2467	0.35422			40.8333	96.4529	26.275
144	2.35526e-12	1.35422e-16		27.4967	0.35171			41.35	96.1147	26.2131
145	1.17763e-12	6.77112e-17		27.7467	0.35342			41.8667	95.6602	25.9081
146	5.88815e-13	3.38556e-17		27.9967	0.35356			42.4	95.234	25.563
147	2.94407e-13	1.69278e-17		28.2467	0.35432			42.9167	94.7912	25.1885
148	1.47204e-13	8.4639e-18		28.4967	0.35848			43.4333	94.0895	24.7573
149	7.36018e-14	4.23195e-18		28.7467	0.3562			43.95	93.0836	24.3472
150	3.68009e-14	2.11597e-18		28.9967	0.35989			44.4833	92.4777	24.0281
151	471.429	0.0271061		29.2467	0.36012			45	92.0338	23.6373
152	942.857	0.0542123		29.4967	0.35594			45.5167	91.0873	23.5231
153	1414.29	0.0813184		29.7467	0.3611			46.0333	89.9966	23.1818
154	1885.71	0.108425		29.9967	0.35598			46.5667	89.167	22.5297
155	2357.14	0.135531		30.2467	0.35949			47.0833	88.0642	21.9326
156	2828.57	0.162637		30.4967	0.35885			47.6	86.9517	21.682
157	3300	0.189743		30.7467	0.35688			48.1167	85.9625	21.051
158	3771.43	0.216849		30.9967	0.35939			48.6333	85.1399	20.6274
159	4242.86	0.243955		31.2467	0.36222			49.1667	84.2552	20.1949
160	4714.29	0.271061		31.4967	0.36142			49.6833	83.2967	19.549
161	5185.71	0.298167		31.7467	0.36205			50.2	82.316	19.3093
162	5657.14	0.325274		31.9967	0.35896			50.7167	81.4465	18.5944
163	6128.57	0.35238		32.2467	0.35777			51.25	80.5713	18.0514
164	6600	0.379486		32.4967	0.36232			51.7667	79.5096	17.6082
165	7071.43	0.406592		32.7467	0.35959			52.2833	78.7733	17.2093
166	7542.86	0.433698		32.9967	0.36326			52.8	78.0453	16.5733
167	8014.29	0.460804		33.2467	0.36072			53.3333	77.2536	16.2889
168	8485.71	0.48791		33.4967	0.36088			53.85	76.4413	15.9014
169	8957.14	0.515016		33.7467	0.36203			54.3667	75.6617	15.4464
170	9428.57	0.542123		33.9967	0.36164			54.8833	74.9541	15.4323
171	9900	0.569229		34.2467	0.356			55.4167	74.0535	14.9953
172	10371.4	0.596335		34.4967	0.35979			55.9333	73.1824	14.802
173	10842.9	0.623441		34.7467	0.36173			56.45	72.4732	14.6757
174	11314.3	0.650547		34.9967	0.35799			56.9667	71.776	14.5288
175	11785.7	0.677653		35.2467	0.35912			57.5	71.0502	14.4269
176	12257.1	0.704759		35.4967	0.36289			58.0167	70.3605	14.4416
177	12728.6	0.731866		35.7467	0.36137			58.5167	69.7805	14.5647
178	13200	0.758972		35.9967	0.35847			59.0167	69.176	14.6082
179	13671.4	0.786078		36.2467	0.35858			59.5333	68.5926	14.4634
180	14142.9	0.813184		36.4967	0.35656			60.0667	67.9846	14.1622
181	14614.3	0.84029		36.7467	0.35853			60.5833	67.6282	14.269
182	15085.7	0.867396		36.9967	0.35747			61.1	67.3717	14.5424
183	15557.1	0.894502		37.2467	0.35528			61.6167	67.2017	14.5211
184	16028.6	0.921608		37.4967	0.35848			62.1333	67.0745	14.6557
185	16500	0.948715		37.7467	0.36028			62.6667	66.995	14.8219
186	16971.4	0.975821		37.9967	0.35641			63.1833	66.811	14.9008
187	17442.9	1.00293		38.2467	0.35521			63.7	66.5427	14.9185
188	17914.3	1.03003		38.4967	0.3557			64.2	66.2644	14.9468
189	18385.7	1.05714		38.7467	0.35584			64.7	66.0769	15.0813
190	18857.1	1.08425		38.9967	0.35531			65.2333	66.0544	15.3061
191	19328.6	1.11135		39.2467	0.35357			65.75	66.076	15.3836
192	19800	1.13846		39.4967	0.35062			66.2667	65.9387	15.1806
193	20271.4	1.16556		39.7467	0.34971			66.8	65.8805	15.332
194	20742.9	1.19267		39.9967	0.35113			67.3167	65.999	15.5065
195	21214.3	1.21978		40.2467	0.34488			67.8167	65.9371	15.6858
196	21685.7	1.24688		40.4967	0.35015			68.3333	66.0286	15.7362
197	22157.1	1.27399		40.7467	0.34845			68.8333	66.0661	15.8166
198	22628.6	1.30109		40.9967	0.34101			69.35	66.3339	15.945
199	23100	1.3282		41.2467	0.34632			69.8833	66.4948	15.9147
200	23571.4	1.35531		41.4967	0.34204			70.4	66.7663	16.017
201	24042.9	1.38241		41.7467	0.34504			70.9167	66.9224	16.1353
202	24514.3	1.40952		41.9967	0.34022			71.4333	67.2363	16.6325
203	24985.7	1.43662		42.2467	0.33756			71.9333	67.3527	16.9132
204	25457.1	1.46373		42.4967	0.33578			72.4667	67.6738	17.0105
205	25928.6	1.49084		42.7467	0.33707			72.9833	67.9693	17.2618
206	26400	1.51794		42.9967	0.33474			73.5	68.5431	17.7225
207	26871.4	1.54505		43.2467	0.33362			74.0167	68.8747	17.9943
208	27342.9	1.57216		43.4967	0.32676			74.55	69.4721	18.2206
209	27814.3	1.59926		43.7467	0.32757			75.0667	70.0276	19.0459
210	28285.7	1.62637		43.9967	0.33112			75.5833	70.1846	19.7192
211	28757.1	1.65347		44.2467	0.32548			76.1	70.7141	20.0103
212	29228.6	1.68058		44.4967	0.32975			76.6333	70.9764	20.2121
213	29700	1.70769		44.7467	0.32095			77.15	71.3848	20.5101
214	30171.4	1.73479		44.9967	0.31921			77.6667	71.6091	21.0166
215	30642.9	1.7619		45.2467	0.31852			78.2	72.1444	21.4634
216	31114.3	1.789		45.4967	0.32019			78.7167	72.2451	21.9057
217	31585.7	1.81611		45.7467	0.3149			79.2333	72.9762	22.4336
218	32057.1	1.84322		45.9967	0.31295			79.7667	73.3494	22.819
219	32528.6	1.87032		46.2467	0.3108			80.2833	74.0412	23.1185
220	33000	1.89743		46.4967	0.30965			80.8	74.8676	23.4709
221	33471.4	1.92454		46.7467	0.30967			81.3	75.63	23.9289
222	33942.9	1.95164		46.9967	0.30553			81.8167	76.6465	24.468
223	34414.3	1.97875		47.2467	0.30545			82.35	77.5609	24.9169
224	34885.7	2.00585		47.4967	0.30173			82.8667	78.4258	25.2441
225	35357.1	2.03296		47.7467	0.29975			83.3833	79.2125	25.6827
226	35828.6	2.06007		47.9967	0.2982			83.9167	79.9559	25.5836
227	36300	2.08717		48.2467	0.29453			84.4333	80.2893	25.7265
228	36771.4	2.11428		48.4967	0.29526			84.95	80.9298	26.3505
229	37242.9	2.14138		48.7467	0.29262			85.4833	81.4224	26.8395
230	37714.3	2.16849		48.9967	0.29056			86	82.1556	27.2047
231	38185.7	2.1956		49.2467	0.289			86.5167	82.396	27.6703
232	38657.1	2.2227		49.4967	0.2862			87.0333	82.7334	28.0458
233	39128.6	2.24981		49.7467	0.28526			87.55	83.1272	28.548
234	39600	2.27691		49.9967	0.27963			88.0667	83.6766	28.956
235	40071.4	2.30402		50.2467	0.28093			88.5833	83.864	29.1398
236	20035.7	1.15201		50.4967	0.28059			89.1167	84.5409	29.7626
237	10017.9	0.576005		50.7467	0.27785			89.6333	85.0409	30.0523
238	5008.93	0.288003		50.9967	0.27774			90.15	85.0837	30.1509
239	2504.46	0.144001		51.2467	0.27546			90.6667	84.8727	29.7391
240	1252.23	0.0720007		51.4967	0.27252			91.1833	84.2108	29.1717
241	626.116	0.0360003		51.7467	0.27395			91.7	83.1678	28.4375
242	313.058	0.0180002		51.9967	0.27086			92.2333	81.8595	27.2309
243	156.529	0.00900008		52.2467	0.27323			92.75	80.1208	25.5873
244	78.2645	0.00450004		52.4967	0.26778			93.2667	77.8503	23.6548
245	39.1323	0.00225002		52.7467	0.26453			93.7833	75.5317	21.5758
246	19.5661	0.00112501		52.9967	0.26164			94.3	72.7106	19.4955
247	9.78306	0.000562505		53.2467	0.25995			94.8167	69.8384	17.3257
248	4.89153	0.000281253		53.4967	0.26129			95.3333	66.8301	14.732
249	2.44577	0.000140626		53.7467	0.26119			95.8667	64.0881	12.3598
250	1.22288	7.03131e-05		53.9967	0.2586			96.3833	61.403	10.2334
251	0.611441	3.51566e-05		54.2467	0.25826			96.9	58.9864	8.13542
252	0.305721	1.75783e-05		54.4967	0.25505			97.4167	56.5756	6.52315
253	0.15286	8.78914e-06		54.7467	0.25073			97.9333	54.3873	5.26557
254	0.0764302	4.39457e-06		54.9967	0.24962			98.45	52.4924	4.29793
255	0.0382151	2.19729e-06		55.2467	0.25162			98.9667	50.6619	3.60628
256	0.0191075	1.09864e-06		55.4967	0.24626			99.5	48.9306	2.75127
257	0.00955377	5.49321e-07		55.7467	0.24999			100.017	47.5191	2.16128
258	0.00477689	2.74661e-07		55.995	0.24162			100.533	46.0677	1.78649
259	0.00238844	1.3733e-07		56.2467	0.24637			101.05	44.5702	1.56624
260	0.00119422	6.86652e-08		56.4967	0.24266			101.567	43.0426	1.38025
261	0.000597111	3.43326e-08		56.7467	0.24309			102.083	41.6739	1.66175
262	0.000298555	1.71663e-08		56.9967	0.24075			102.6	40.4004	1.85203
263	0.000149278	8.58315e-09		57.2467	0.23667			103.117	39.0389	1.97681
264	7.46389e-05	4.29157e-09		57.4967	0.23894			103.65	37.8984	2.15379
265	3.73194e-05	2.14579e-09		57.7467	0.23931			104.167	36.5962	2.2113
266	1.86597e-05	1.07289e-09		57.9967	0.23749			104.683	35.5379	2.42906
267	9.32986e-06	5.36447e-10		58.2467	0.23481			105.2	33.9899	2.37047
268	4.66493e-06	2.68223e-10		58.4967	0.23183			105.717	32.9286	2.58612
269	2.33246e-06	1.34112e-10		58.745	0.23365			106.233	31.845	3.01597
270	1.16623e-06	6.70558e-11		58.9967	0.23523			106.75	30.829	3.05459
271	5.83116e-07	3.35279e-11		59.2467	0.23237			107.267	29.9895	2.99789
272	2.91558e-07	1.6764e-11		59.495	0.22809			107.8	29.1934	2.91228
273	1.45779e-07	8.38198e-12		59.7467	0.22856			108.317	28.2454	2.81835
274	7.28895e-08	4.19099e-12		59.995	0.23009			108.833	27.1909	2.8295
275	3.64448e-08	2.09549e-12		60.2467	0.22293			109.333	26.5643	2.92352
276	1.82224e-08	1.04775e-12		60.495	0.22315			109.85	25.9563	3.01197
277	9.11119e-09	5.23874e-13		60.7467	0.22692			110.383	25.7299	3.28706
278	4.55559e-09	2.61937e-13		60.995	0.22374			110.9	24.9945	3.44726
279	2.2778e-09	1.30968e-13		61.2467	0.2212			111.417	24.7321	3.32701
280	1.1389e-09	6.54842e-14		61.495	0.22385			111.933	24.2006	3.65119
281	5.69449e-10	3.27421e-14		61.7467	0.22238			112.467	23.6853	3.79011
282	2.84725e-10	1.63711e-14		61.9967	0.223			112.983	23.1198	4.05584
283	1.42362e-10	8.18553e-15		62.2467	0.22109			113.5	23.0608	4.31439
284	7.11812e-11	4.09276e-15		62.4967	0.22018			114.033	22.8996	4.46397
285	3.55906e-11	2.04638e-15		62.745	0.22108			114.55	22.2942	4.51858
286	1.77953e-11	1.02319e-15		62.9967	0.21894			115.067	21.903	4.6561
				63.245	0.21955			115.583	21.4415	4.81554
				63.495	0.22106			116.1	21.1274	4.77062
				63.745	0.21879			116.633	20.4648	4.88739
				63.995	0.22021			117.15	20.2355	4.94446
				64.245	0.22029			117.667	19.9585	4.99222
				64.495	0.21855			118.183	19.6466	5.10304
				64.7467	0.21716			118.7	18.9574	5.12586
				64.995	0.21909			119.233	18.417	5.18988
				65.2467	0.2179			119.75	17.8522	5.1754
				65.495	0.21858			120.267	17.5153	5.5157
				65.7467	0.21374			120.783	17.1856	5.64465
				65.995	0.21222			121.317	16.8978	5.72091
				66.245	0.21625			121.833	16.3873	5.98006
				66.4967	0.2167			122.35	16.2379	6.08229
				66.745	0.21386			122.867	15.8796	6.30877
				66.9967	0.21908			123.383	15.6539	6.25457
				67.245	0.21856			123.917	15.3805	6.50001
				67.495	0.21623			124.433	15.1352	6.53063
				67.745	0.21614			124.95	15.4583	6.81667
				67.995	0.21467			125.467	14.7758	6.56784
				68.245	0.21405			125.983	14.2674	6.49542
				68.495	0.21355			126.517	13.9321	6.85833
				68.745	0.21736			127.033	13.5387	6.9097
				68.995	0.21691			127.55	12.8172	6.72114
				69.245	0.21888			128.067	12.4655	6.5218
				69.495	0.21561			128.583	11.9809	6.67352
				69.745	0.21355			129.117	11.7982	6.54326
				69.9967	0.21533			129.633	11.4536	6.4712
				70.245	0.21898			130.15	11.1129	6.19264
				70.4967	0.2186			130.667	11.1545	6.29102
				70.745	0.2167			131.183	11.344	6.41201
				70.9967	0.21711			131.717	11.3136	6.04569
				71.245	0.21758			132.233	11.4834	6.00589
				71.495	0.21502			132.75	11.2582	6.08313
				71.745	0.22086			133.267	11.2591	6.08789
				71.995	0.21532			133.8	11.1985	5.95829
				72.245	0.21636			134.317	11.1509	6.05826
				72.495	0.22032			134.833	11.2812	6.22487
				72.745	0.21697			135.35	11.3021	6.38314
				72.995	0.21741			135.867	11.3539	6.36118
				73.245	0.2203			136.367	10.8299	6.43557
				73.495	0.22041			136.883	10.468	6.61209
				73.745	0.22141			137.417	10.1485	6.65497
				73.995	0.2227			137.933	10.1103	6.5758
				74.245	0.21943			138.45	9.4763	6.85044
				74.4967	0.22141			138.967	9.50863	6.86139
				74.745	0.21851			139.483	9.01351	6.65177
				74.9967	0.21828			140.017	8.42464	6.63152
				75.245	0.21849			140.533	7.82765	6.50871
				75.495	0.22314			141.05	7.08779	6.46252
				75.745	0.21964			141.567	6.97887	6.30813
				75.995	0.22385			142.1	7.33399	6.35278
				76.245	0.22328			142.617	7.08682	6.27544
				76.495	0.22522			143.133	7.16634	6.54685
				76.745	0.2231			143.65	7.80051	6.44755
				76.995	0.22805			144.183	7.46139	6.24474
				77.245	0.22304			144.7	7.80461	6.35215
				77.495	0.22739			145.217	7.96845	6.53605
				77.745	0.2259			145.733	7.71914	6.78039
				77.995	0.2274			146.25	7.65772	6.70492
				78.245	0.22704			146.783	7.49067	6.70535
				78.495	0.22432			147.3	6.42251	6.60444
				78.745	0.22507			147.817	6.01879	6.57122
				78.995	0.23378			148.333	5.38393	6.58572
				79.245	0.22688			148.85	4.72968	6.43093
				79.495	0.22431			149.383	4.39781	6.80474
				79.745	0.22946			149.9	3.78703	6.92259
				79.995	0.22732			150.417	3.44911	6.87165
				80.245	0.22772			150.933	3.63657	6.86885
				80.495	0.22828			151.45	3.70789	7.12433
				80.745	0.22889			151.983	3.79442	7.23721
				80.995	0.2279			152.5	3.90389	7.35279
				81.245	0.2311			153.017	4.02314	7.49735
				81.495	0.23163			153.533	4.18501	7.4489
				81.745	0.23191			154.067	3.97962	7.51363
				81.995	0.23149			154.583	3.83832	7.27119
				82.245	0.22957			155.1	3.85428	7.24692
				82.495	0.23261			155.617	3.86164	7.33774
				82.745	0.23392			156.15	3.66529	7.26573
				82.995	0.22881			156.667	3.33415	7.1811
				83.245	0.23021			157.183	2.90758	7.05289
				83.495	0.23514			157.7	2.99662	7.17072
				83.745	0.23022			158.217	2.97364	7.26041
				83.995	0.23216			158.75	2.9363	7.23206
				84.245	0.23302			159.267	2.83611	7.24289
				84.495	0.23284			159.783	2.90164	7.37724
				84.745	0.23361			160.317	2.99057	7.46981
				84.995	0.23805			160.833	2.79869	7.17516
				85.245	0.23692			161.35	2.65771	7.08849
				85.495	0.23324			161.867	3.01453	6.98466
				85.745	0.23631			162.383	3.06831	7.11805
				85.995	0.23579			162.9	3.01062	7.05353
				86.245	0.23641			163.433	2.99637	7.00763
				86.495	0.23652			163.95	3.15706	7.09561
				86.745	0.23458			164.467	3.25963	7.12002
				86.995	0.24049			164.983	3.36295	7.09527
				87.245	0.23889			165.517	3.18935	6.93687
				87.495	0.23645			166.033	3.2223	7.11562
				87.745	0.24142			166.55	3.15409	7.15749
				87.995	0.23976			167.067	3.10199	7.33067
				88.245	0.2393			167.583	3.26747	7.31334
				88.495	0.24372			168.117	3.14499	7.31936
				88.745	0.24115			168.633	3.07589	7.35816
				88.995	0.2368			169.15	2.74886	7.57201
				89.245	0.24153			169.667	2.70012	7.48034
				89.495	0.24165			170.2	2.37688	7.55262
				89.745	0.2391			170.717	2.41897	7.73657
				89.995	0.23662			171.233	2.70398	7.85333
				90.245	0.24179			171.767	2.76477	7.99586
				90.495	0.24191			172.283	2.67688	8.0042
				90.745	0.24047			172.8	2.54483	7.99229
				90.995	0.23819			173.317	2.85584	8.06923
				91.245	0.24082			173.85	2.85098	7.9123
				91.495	0.23873			174.367	2.98671	7.82956
				91.745	0.23489			174.883	2.81142	7.91897
				91.995	0.2354			175.4	3.04098	8.01245
				92.245	0.23379			175.933	3.05233	7.89182
				92.495	0.23341			176.45	2.80004	7.64249
				92.745	0.22978			176.967	2.65816	7.68842
				92.995	0.22665			177.483	2.40268	7.71255
				93.245	0.22809			178	2.35643	7.77293
				93.495	0.22573			178.533	1.9648	7.7833
				93.745	0.22425			179.033	1.82364	8.12415
				93.995	0.21959			179.55	1.5218	8.03321
				94.245	0.22003			180.067	1.56499	8.29273
				94.495	0.21584			180.583	1.35075	8.3523
				94.745	0.21227			181.1	1.26086	8.42101
				94.995	0.21476			181.633	1.09264	8.52733
				95.245	0.21106			182.15	1.10346	8.54334
				95.495	0.20311			182.667	1.25781	8.59668
				95.745	0.19894			183.183	1.29388	8.57877
				95.995	0.19936			183.717	1.42741	8.65279
				96.245	0.19484			184.233	1.6477	8.49398
				96.495	0.19364			184.75	1.86952	8.38484
				96.745	0.18898			185.267	1.93638	8.15075
				96.995	0.18999			185.8	2.15922	7.99265
				97.245	0.18385			186.317	2.24909	8.0725
				97.495	0.18634			186.833	2.21274	8.09333
				97.745	0.18023			187.35	2.45322	8.10886
				97.995	0.17743			187.883	2.60741	8.14821
				98.245	0.17495			188.4	2.81879	8.22543
				98.495	0.17495			188.917	3.12944	8.2113
				98.745	0.1725			189.433	3.50309	8.23735
				98.995	0.1707			189.967	3.77057	8.4541
				99.245	0.16695			190.483	4.22835	8.50989
				99.495	0.16334			191	4.546	8.51529
				99.745	0.16202			191.533	5.10694	8.56234
				99.995	0.15932			192.05	5.98592	8.71137
				100.245	0.16006			192.567	6.4261	8.77603
				100.495	0.15863			193.083	6.91383	8.80521
				100.745	0.1546			193.617	7.51139	9.12795
				100.995	0.15144			194.133	7.87159	9.4149
				101.245	0.15159			194.65	8.10316	9.53441
				101.495	0.15087			195.167	8.7371	9.74172
				101.745	0.14247			195.7	9.28533	10.11
				101.995	0.14342			196.217	9.97063	10.5072
				102.245	0.14153			196.733	10.5638	10.8191
				102.495	0.14076			197.25	10.9446	11.1618
				102.745	0.13928			197.783	11.5245	11.5969
				102.995	0.13877			198.3	12.3925	12.0053
				103.245	0.13316			198.817	12.9096	12.1237
				103.495	0.13222			199.333	13.8624	12.3318
				103.745	0.1309			199.867	14.9583	12.6663
				103.995	0.12947			200.383	15.6847	12.9958
				104.245	0.12596			200.9	16.3555	13.1852
				104.495	0.12634			201.417	17.0544	13.6927
				104.745	0.12509			201.933	17.6847	13.9212
				104.995	0.12604			202.467	18.5548	14.1984
				105.245	0.12138			202.983	19.2444	14.4331
				105.495	0.11864			203.5	19.9406	14.5972
				105.745	0.11992			204.033	20.8204	14.8776
				105.995	0.11701			204.55	21.7495	15.1499
				106.245	0.11831			205.067	22.2316	15.4217
				106.495	0.11533			205.583	23.0639	15.6096
				106.745	0.11677			206.117	23.9263	16.1166
				106.995	0.11199			206.633	24.7915	16.123
				107.245	0.11093			207.15	25.6819	16.61
				107.495	0.11264			207.667	26.4009	17.0595
				107.745	0.11352			208.183	27.5893	17.4173
				107.995	0.10925			208.717	28.2202	17.9185
				108.245	0.10776			209.233	29.1256	18.5899
				108.495	0.10615			209.75	29.7767	19.0621
				108.745	0.10649			210.267	30.8794	19.3909
				108.995	0.10732			210.783	31.743	19.5744
				109.245	0.10898			211.317	32.8691	19.9911
				109.495	0.10425			211.833	33.7046	20.5787
				109.745	0.10254			212.35	34.6741	20.8931
				109.995	0.10296			212.867	35.6725	21.3297
				110.245	0.10012			213.4	36.3595	21.7502
				110.495	0.10158			213.917	37.5041	22.0945
				110.745	0.10077			214.433	38.4933	22.2859
				110.995	0.09869			214.95	39.3215	22.5623
				111.245	0.09708			215.467	40.1156	23.033
				111.495	0.10231			215.983	40.8245	23.7919
				111.745	0.09409			216.517	41.6553	23.914
				111.995	0.0968			217.033	42.7521	24.1879
				112.245	0.09888			217.55	43.4343	24.4776
				112.495	0.09423			218.067	43.9555	24.692
				112.745	0.09436			218.6	44.4496	24.9997
				112.995	0.09781			219.117	45.2502	25.4125
				113.245	0.09646			219.633	45.8388	25.98
				113.495	0.09501			220.15	46.8504	26.5177
				113.745	0.09329			220.667	47.972	26.9227
				113.995	0.09116			221.2	49.2069	27.1749
				114.245	0.09177			221.717	50.0343	27.7975
				114.495	0.09369			222.233	50.6125	28.2296
				114.745	0.08981			222.75	51.5917	28.636
				114.995	0.08951			223.283	53.0047	29.2049
				115.245	0.08931			223.8	54.572	29.6546
				115.495	0.09003			224.317	55.2632	30.0765
				115.745	0.09001			224.833	56.6491	30.5761
				115.995	0.0877			225.367	57.9816	30.8006
				116.245	0.08514			225.883	58.9262	31.2065
				116.495	0.08983			226.383	59.6908	31.502
				116.745	0.08853			226.9	60.6966	31.7152
				116.995	0.08751			227.417	61.8992	31.9158
				117.245	0.08572			227.95	63.2192	32.4698
				117.495	0.08474			228.467	64.1913	32.8582
				117.745	0.09061			228.983	64.9376	33.1559
				117.995	0.0835			229.5	66.2665	33.4298
				118.245	0.08694			230.033	67.0888	33.7177
				118.495	0.08149			230.55	67.5648	34.1094
				118.745	0.08275			231.067	68.059	34.2181
				118.995	0.08427			231.583	69.2818	34.6297
				119.245	0.08265			232.1	70.0381	35.1043
				119.495	0.08435			232.617	70.9386	35.6356
				119.745	0.08324			233.133	71.7836	35.9648
				119.995	0.08298			233.667	72.7885	36.3581
				120.245	0.08167			234.183	73.85	36.8164
				120.495	0.08116			234.7	74.4027	37.1067
				120.745	0.08216			235.217	74.7893	36.8599
				120.995	0.08222			235.733	75.1045	36.9189
				121.245	0.08131			236.25	75.124	36.7718
				121.495	0.08594			236.767	74.4864	36.1921
				121.745	0.0769			237.3	73.7979	35.2442
				121.995	0.07591			237.817	72.2806	34.3644
				122.245	0.07873			238.333	70.2358	32.7601
				122.495	0.07742			238.85	67.6225	30.8429
				122.745	0.07787			239.367	64.7222	28.8456
				122.995	0.07865			239.883	61.7191	26.6966
				123.245	0.0769			240.4	57.8029	24.6936
				123.495	0.07849			240.917	53.8808	22.5988
				123.745	0.07447			241.45	50.2452	20.699
				123.995	0.07668			241.967	46.4662	18.8234
				124.245	0.07746			242.483	42.7157	17.3033
				124.495	0.07988			243	39.3184	15.868
				124.745	0.07579			243.517	36.1226	14.7577
				124.995	0.07308			244.033	33.2245	14.1162
				125.245	0.0761			244.55	30.3275	13.5364
				125.495	0.07469			245.083	27.6223	13.3931
				125.745	0.07498			245.6	25.9284	13.2617
				125.995	0.07971			246.117	24.4996	12.9807
				126.245	0.07447			246.633	22.9206	13.2967
				126.495	0.07224			247.167	21.4475	13.682
				126.745	0.07352			247.683	19.8695	14.0437
				126.995	0.07807			248.2	18.7104	14.3702
				127.245	0.07214			248.717	17.4758	14.9257
				127.495	0.07822			249.25	16.4882	15.0178
				127.745	0.07467			249.767	15.8169	15.373
				127.995	0.07496			250.283	15.1478	15.6386
				128.245	0.07358			250.8	14.2539	15.9571
				128.495	0.0746			251.333	13.2205	16.5482
				128.745	0.07237			251.85	12.7436	16.6832
				128.995	0.07087			252.367	12.0533	16.9297
				129.245	0.07507			252.883	11.8409	17.1121
				129.495	0.07127			253.4	11.3152	17.122
				129.745	0.07285			253.933	11.0973	17.0218
				129.995	0.07002			254.45	10.7853	17.1995
				130.245	0.07239			254.967	10.4445	17.2255
				130.495	0.07			255.483	10.1153	17.2468
				130.745	0.07049			256.017	10.3249	17.2373
				130.995	0.07034			256.517	10.2502	17.1154
				131.245	0.07386			257.033	10.0332	17.168
				131.495	0.07006			257.55	10.077	16.9223
				131.745	0.07075			258.067	10.1197	16.7829
				131.995	0.06895			258.6	10.1349	16.8351
				132.245	0.07078			259.117	10.1663	16.9189
				132.495	0.06741			259.633	9.88291	16.7742
				132.745	0.07217			260.15	9.74143	16.6816
				132.995	0.0691			260.667	9.66443	16.5772
				133.243	0.07107			261.2	8.94026	16.7144
				133.495	0.07014			261.717	8.85466	16.7808
				133.745	0.0707			262.233	8.37039	16.7229
				133.995	0.06899			262.75	8.32064	17.0352
				134.243	0.06841			263.267	8.02868	17.3351
				134.495	0.06938			263.8	7.99254	17.2005
				134.745	0.07099			264.317	7.49847	17.0831
				134.995	0.06814			264.833	7.39665	17.3233
				135.245	0.06726			265.35	7.43252	17.4883
				135.495	0.06646			265.867	7.20718	17.4909
				135.745	0.0699			266.4	7.46049	17.3296
				135.995	0.06583			266.917	7.29548	17.4114
				136.245	0.06726			267.433	7.63087	17.2655
				136.495	0.06736			267.95	7.70025	17.1814
				136.745	0.06804			268.483	7.72504	16.9636
				136.995	0.06697			269	7.67294	16.9365
				137.243	0.06803			269.517	7.60479	17.2217
				137.495	0.06692			270.033	7.62522	17.1502
				137.743	0.06249			270.567	7.36118	17.2179
				137.995	0.06738			271.083	7.56489	17.3396
				138.243	0.06494			271.6	7.31978	17.6156
				138.495	0.06438			272.117	7.20969	17.3904
				138.743	0.06542			272.65	6.91125	17.2845
				138.995	0.06672			273.167	6.42089	17.5885
				139.245	0.06286			273.683	6.25842	17.6525
				139.495	0.06491			274.2	6.06253	17.7368
				139.743	0.06248			274.733	6.05035	17.9094
				139.995	0.06638			275.25	5.99407	18.038
				140.245	0.06642			275.767	5.84638	17.9777
				140.495	0.06453			276.283	5.57948	18.0402
				140.745	0.06832			276.8	5.77632	17.9557
				140.995	0.06536			277.333	5.8973	18.087
				141.243	0.06468			277.85	5.98149	18.1815
				141.493	0.06255			278.367	6.27748	18.0546
				141.743	0.06383			278.9	6.19833	18.3644
				141.995	0.06124			279.417	6.34476	18.4892
				142.243	0.06307			279.933	6.30481	18.5977
				142.493	0.0636			280.45	6.39957	18.6951
				142.743	0.06328			280.95	6.3679	18.855
				142.995	0.0613			281.483	6.47643	18.9322
				143.243	0.0643			282	6.20325	18.9747
				143.495	0.06099			282.517	6.00566	19.2241
				143.743	0.06405			283.05	6.22982	19.448
				143.995	0.06079			283.567	6.27957	19.5663
				144.245	0.06199			284.083	6.63738	19.4389
				144.495	0.06218			284.6	6.94644	19.4903
				144.745	0.06155			285.133	7.7811	19.3953
				144.995	0.05856			285.65	8.05162	19.3344
				145.243	0.06216			286.167	8.74985	19.3836
				145.493	0.05966			286.683	9.29367	19.2035
				145.743	0.06107			287.217	10.073	19.1621
				145.993	0.06015			287.733	10.8348	19.2293
				146.243	0.05711			288.25	11.1899	19.3829
				146.493	0.0601			288.783	11.9741	19.4125
				146.743	0.0601			289.3	12.014	19.5632
				146.993	0.06241			289.817	11.9881	19.6299
				147.243	0.06182			290.333	11.7384	19.3942
				147.493	0.06065			290.867	12.0947	19.5817
				147.743	0.06137			291.367	12.2992	19.6445
				147.993	0.05837			291.883	12.4216	19.9341
				148.247	0.06075			292.4	12.5168	19.8989
				148.495	0.06286			292.917	12.4489	20.0551
				148.745	0.06164			293.45	12.4606	20.149
				148.995	0.06087			293.967	11.9286	19.9707
				149.243	0.06035			294.483	12.2416	19.9891
				149.493	0.06045			295	12.4332	20.1767
				149.743	0.05927			295.533	12.7544	20.5596
				149.993	0.06241			296.05	12.7692	20.5044
				150.243	0.05922			296.567	12.704	20.416
				150.493	0.05874			297.083	12.5256	20.4597
				150.743	0.058			297.617	12.6143	20.705
				150.993	0.0549			298.133	12.6392	20.4378
				151.243	0.05657			298.65	12.6199	20.4446
				151.493	0.05886			299.167	12.6721	20.4883
				151.745	0.0579			299.683	12.582	20.466
				151.993	0.06033			300.217	12.3816	20.2876
				152.245	0.05722			300.733	12.2604	20.0796
				152.493	0.06064			301.25	11.5961	20.1604
				152.743	0.06043			301.767	11.6476	20.4879
				152.993	0.05891			302.3	11.754	20.7222
				153.243	0.059			302.817	11.8231	21.0456
				153.493	0.05743			303.333	12.2737	21.9048
				153.743	0.06106			303.85	12.693	23.2428
				153.993	0.06137			304.383	13.8978	25.0701
				154.243	0.05952			304.9	15.1573	27.4981
				154.493	0.05573			305.417	16.5849	30.2852
				154.743	0.05825			305.933	18.4265	33.8357
				154.993	0.0582			306.45	21.4255	37.3796
				155.243	0.05912			306.967	23.9054	41.5112
				155.493	0.05933			307.5	26.6909	45.7227
				155.743	0.05543			308.017	29.1765	50.6037
				155.993	0.06176			308.533	31.9841	55.2875
				156.243	0.05608			309.05	34.8237	59.4651
				156.493	0.05777			309.567	37.4777	63.6384
				156.743	0.05757			310.083	39.8135	67.0897
				156.993	0.05606			310.6	42.136	70.4529
				157.243	0.0577			311.133	44.0822	73.2989
				157.493	0.05422			311.65	45.6784	76.0153
				157.743	0.05302			312.167	47.1478	78.1342
				157.993	0.05834			312.683	48.1615	79.8813
				158.243	0.05014			313.2	49.2092	81.1347
				158.493	0.05567			313.717	49.8986	82.2609
				158.743	0.05425			314.25	50.4004	83.6353
				158.993	0.05643			314.767	50.9487	84.4821
				159.243	0.05383			315.283	51.4691	85.1997
				159.493	0.05518			315.8	51.971	85.7651
				159.743	0.05651			316.317	52.0981	86.3907
				159.993	0.05373			316.833	52.4266	87.0593
				160.243	0.05836			317.35	52.7668	87.5011
				160.493	0.0548			317.867	52.9384	88.02
				160.743	0.05681			318.383	53.2706	88.4067
				160.993	0.05308			318.917	53.2974	88.5877
				161.243	0.05407			319.433	53.8467	88.4577
				161.493	0.05433			319.95	53.8354	88.9467
				161.743	0.05495			320.467	53.9169	89.4388
				161.993	0.05167			320.983	53.903	89.9961
				162.243	0.05542			321.5	54.2442	90.2712
				162.493	0.05538			322.017	53.8709	90.377
				162.743	0.04895			322.55	53.7232	90.7327
				162.993	0.05376			323.067	53.8582	90.9352
				163.243	0.0574			323.583	53.9535	91.2495
				163.493	0.05113			324.1	54.223	91.584
				163.743	0.0509			324.617	53.7824	91.933
				163.993	0.05534			325.133	53.6443	91.961
				164.243	0.05559			325.65	53.8151	92.0665
				164.493	0.05561			326.167	53.937	92.4362
				164.743	0.04886			326.683	53.6786	92.481
				164.993	0.04929			327.217	53.8824	92.6308
				165.243	0.05175			327.733	53.9214	92.8316
				165.493	0.05182			328.25	53.9375	93.244
				165.743	0.05434			328.767	54.066	93.6909
				165.993	0.05697			329.283	54.1245	93.9212
				166.243	0.05463			329.8	54.3963	94.3297
				166.493	0.05563			330.333	54.4714	94.6378
				166.743	0.05644			330.85	54.3437	94.7536
				166.993	0.05022			331.367	53.902	94.7879
				167.243	0.04942			331.883	53.974	94.9823
				167.493	0.05086			332.4	53.6922	95.3687
				167.743	0.0538			332.917	53.2785	95.5033
				167.993	0.04949			333.433	53.3951	95.6428
				168.243	0.05178			333.95	52.7136	95.7208
				168.493	0.05287			334.467	52.1304	95.7272
				168.743	0.05802			334.983	51.6783	95.7337
				168.993	0.05313			335.517	50.8833	95.9594
				169.243	0.05446			336.033	50.4406	96.1097
				169.493	0.05344			336.55	50.32	96.1859
				169.743	0.05295			337.067	49.9593	96.5884
				169.993	0.04978			337.583	49.6542	96.5547
				170.243	0.04908			338.117	49.4254	96.6543
				170.493	0.05278			338.633	48.7353	96.6969
				170.743	0.0515			339.15	48.6967	96.6449
				170.993	0.05112			339.667	48.7242	96.8919
				171.243	0.0501			340.183	48.5776	97.0381
				171.493	0.051			340.7	48.9006	97.0092
				171.743	0.05094			341.217	48.5913	97.4482
				171.993	0.05175			341.733	48.465	97.4419
				172.243	0.04567			342.25	48.3407	97.3403
				172.493	0.05168
				172.743	0.04964
				172.993	0.05781
				173.243	0.05108
				173.493	0.05164
				173.743	0.05205
				173.993	0.0525
				174.243	0.0503
				174.493	0.05359
				174.743	0.05474
				174.993	0.04763
				175.243	0.04948
				175.493	0.05197
				175.743	0.05294
				175.993	0.04663
				176.243	0.04861
				176.493	0.05162
				176.743	0.04893
				176.993	0.05435
				177.243	0.05104
				177.493	0.05199
				177.743	0.05399
				177.993	0.04915
				178.243	0.05253
				178.493	0.05072
				178.743	0.05233
				178.993	0.05073
				179.243	0.04939
				179.493	0.0537
				179.743	0.05128
				179.993	0.05042
				180.243	0.05003
				180.493	0.04686
				180.743	0.05162
				180.993	0.04771
				181.243	0.04925
				181.493	0.05054
				181.743	0.04964
				181.993	0.05043
				182.243	0.04681
				182.493	0.0483
				182.743	0.0526
				182.993	0.05222
				183.243	0.04969
				183.493	0.0499
				183.743	0.05287
				183.993	0.05129
				184.243	0.04799
				184.493	0.05669
				184.743	0.05269
				184.993	0.05518
				185.243	0.05288
				185.493	0.05512
				185.743	0.05306
				185.993	0.05061
				186.243	0.05008
				186.493	0.05377
				186.743	0.05462
				186.993	0.05528
				187.243	0.05886
				187.493	0.05522
				187.743	0.05565
				187.993	0.05716
				188.243	0.05957
				188.493	0.05851
				188.743	0.05841
				188.993	0.05841
				189.243	0.06204
				189.493	0.05872
				189.743	0.05982
				189.993	0.06231
				190.243	0.06399
				190.493	0.06401
				190.743	0.06043
				190.993	0.06495
				191.243	0.06297
				191.493	0.06454
				191.743	0.06403
				191.993	0.06667
				192.243	0.06879
				192.493	0.06824
				192.743	0.06744
				192.993	0.06738
				193.243	0.06922
				193.493	0.06489
				193.743	0.06957
				193.993	0.06935
				194.243	0.07036
				194.493	0.07134
				194.743	0.07144
				194.993	0.07254
				195.243	0.06666
				195.493	0.0722
				195.743	0.07605
				195.993	0.07366
				196.243	0.07687
				196.493	0.07388
				196.743	0.07558
				196.993	0.07803
				197.243	0.07472
				197.493	0.07745
				197.743	0.0786
				197.993	0.07696
				198.243	0.07781
				198.493	0.0792
				198.743	0.08118
				198.993	0.07765
				199.243	0.08161
				199.493	0.08101
				199.743	0.07981
				199.993	0.08411
				200.243	0.08227
				200.493	0.08308
				200.743	0.08324
				200.993	0.08109
				201.243	0.08576
				201.493	0.08407
				201.743	0.08485
				201.993	0.08711
				202.243	0.08649
				202.493	0.08714
				202.743	0.08864
				202.993	0.08946
				203.243	0.09148
				203.493	0.09131
				203.743	0.08924
				203.993	0.09132
				204.243	0.0943
				204.493	0.09519
				204.743	0.09384
				204.993	0.09763
				205.243	0.09349
				205.493	0.09751
				205.743	0.09562
				205.993	0.09944
				206.243	0.09662
				206.493	0.10194
				206.743	0.09945
				206.993	0.10424
				207.243	0.10274
				207.493	0.10212
				207.743	0.1023
				207.993	0.10541
				208.243	0.10573
				208.493	0.10801
				208.742	0.10746
				208.993	0.10929
				209.243	0.11132
				209.493	0.10796
				209.743	0.11075
				209.993	0.1116
				210.243	0.11265
				210.493	0.1144
				210.743	0.11257
				210.993	0.11422
				211.243	0.11359
				211.493	0.1185
				211.743	0.11833
				211.993	0.11864
				212.243	0.12083
				212.493	0.11992
				212.742	0.12256
				212.993	0.12185
				213.242	0.12413
				213.493	0.12225
				213.742	0.12314
				213.993	0.1256
				214.242	0.12616
				214.493	0.12694
				214.743	0.12874
				214.993	0.12651
				215.243	0.13046
				215.492	0.13212
				215.743	0.1361
				215.992	0.13264
				216.243	0.13521
				216.492	0.1323
				216.742	0.13744
				216.992	0.13981
				217.242	0.13649
				217.493	0.13806
				217.742	0.14141
				217.993	0.13565
				218.242	0.14151
				218.493	0.14161
				218.742	0.14295
				218.993	0.14179
				219.243	0.14557
				219.492	0.14514
				219.743	0.14568
				219.992	0.1483
				220.243	0.14957
				220.492	0.14907
				220.742	0.15064
				220.992	0.15002
				221.242	0.15372
				221.492	0.15412
				221.742	0.15645
				221.992	0.15846
				222.242	0.15953
				222.492	0.15757
				222.742	0.15961
				222.993	0.15694
				223.243	0.1651
				223.492	0.16305
				223.743	0.16522
				223.992	0.16387
				224.243	0.16894
				224.492	0.16429
				224.742	0.17089
				224.992	0.16952
				225.242	0.17219
				225.492	0.17313
				225.742	0.1757
				225.992	0.17254
				226.242	0.1765
				226.492	0.17551
				226.742	0.17586
				226.992	0.18234
				227.243	0.18055
				227.492	0.17749
				227.743	0.17924
				227.992	0.18078
				228.243	0.18123
				228.492	0.18353
				228.742	0.18457
				228.992	0.18697
				229.242	0.18577
				229.492	0.186
				229.742	0.18572
				229.992	0.18965
				230.242	0.19288
				230.492	0.18995
				230.742	0.1936
				230.992	0.19142
				231.242	0.19223
				231.492	0.19507
				231.742	0.19895
				231.992	0.19631
				232.242	0.20191
				232.492	0.20099
				232.742	0.2008
				232.992	0.20145
				233.242	0.20317
				233.492	0.20652
				233.742	0.20488
				233.992	0.20587
				234.242	0.20692
				234.492	0.20522
				234.742	0.20358
				234.992	0.2048
				235.242	0.20676
				235.492	0.20739
				235.742	0.20626
				235.992	0.20292
				236.242	0.2067
				236.492	0.20216
				236.742	0.19893
				236.992	0.20213
				237.242	0.19876
				237.492	0.19884
				237.742	0.19867
				237.992	0.19479
				238.242	0.19504
				238.492	0.19064
				238.742	0.19008
				238.992	0.1842
				239.242	0.18188
				239.492	0.18206
				239.742	0.1752
				239.992	0.17629
				240.242	0.16972
				240.492	0.16784
				240.742	0.16379
				240.992	0.16222
				241.242	0.15396
				241.492	0.14565
				241.742	0.15093
				241.992	0.14332
				242.242	0.14
				242.492	0.13317
				242.742	0.13091
				242.992	0.12702
				243.242	0.12715
				243.492	0.11977
				243.742	0.11552
				243.992	0.10914
				244.242	0.1089
				244.492	0.107
				244.742	0.10342
				244.992	0.09774
				245.242	0.09772
				245.492	0.096
				245.742	0.09214
				245.992	0.08734
				246.242	0.08653
				246.492	0.08347
				246.742	0.08394
				246.992	0.08071
				247.242	0.07999
				247.492	0.07736
				247.742	0.0734
				247.992	0.07366
				248.242	0.07308
				248.492	0.07042
				248.742	0.06887
				248.992	0.07411
				249.242	0.07198
				249.492	0.06333
				249.742	0.06002
				249.992	0.06534
				250.242	0.06366
				250.492	0.05946
				250.742	0.06252
				250.992	0.06468
				251.242	0.05961
				251.492	0.05657
				251.742	0.0549
				251.992	0.05766
				252.242	0.05585
				252.492	0.05299
				252.742	0.05397
				252.992	0.05428
				253.242	0.05401
				253.492	0.0504
				253.742	0.05078
				253.992	0.04873
				254.242	0.0523
				254.492	0.05073
				254.742	0.05118
				254.992	0.04461
				255.242	0.0492
				255.492	0.04777
				255.742	0.04817
				255.992	0.0499
				256.242	0.04545
				256.492	0.04493
				256.742	0.04153
				256.992	0.04703
				257.242	0.04733
				257.492	0.04473
				257.742	0.04342
				257.992	0.04507
				258.242	0.04502
				258.492	0.04399
				258.742	0.04112
				258.992	0.04703
				259.242	0.0468
				259.492	0.04494
				259.742	0.04472
				259.992	0.03636
				260.242	0.04319
				260.492	0.04054
				260.742	0.04461
				260.992	0.04392
				261.242	0.04493
				261.492	0.04236
				261.742	0.03912
				261.992	0.04335
				262.242	0.04275
				262.492	0.04155
				262.742	0.04121
				262.992	0.04043
				263.242	0.04392
				263.492	0.0418
				263.742	0.04389
				263.992	0.04643
				264.242	0.04267
				264.492	0.04441
				264.742	0.04366
				264.992	0.04073
				265.242	0.03887
				265.492	0.04165
				265.742	0.03949
				265.992	0.03912
				266.242	0.04532
				266.492	0.0386
				266.742	0.04304
				266.992	0.04092
				267.242	0.04017
				267.492	0.04109
				267.742	0.03862
				267.992	0.03789
				268.242	0.04107
				268.492	0.03866
				268.742	0.03788
				268.992	0.03668
				269.242	0.03484
				269.492	0.038
				269.742	0.0386
				269.992	0.03902
				270.242	0.03688
				270.492	0.03983
				270.742	0.03913
				270.992	0.03713
				271.242	0.03614
				271.492	0.03789
				271.742	0.0359
				271.992	0.03937
				272.242	0.03928
				272.492	0.04239
				272.742	0.03503
				272.992	0.03645
				273.242	0.03923
				273.492	0.03677
				273.742	0.03789
				273.992	0.03753
				274.242	0.03545
				274.492	0.04153
				274.742	0.03371
				274.992	0.03469
				275.242	0.03333
				275.492	0.03364
				275.742	0.03748
				275.992	0.03557
				276.242	0.03215
				276.492	0.03672
				276.742	0.03383
				276.992	0.03513
				277.242	0.0333
				277.492	0.03298
				277.742	0.0362
				277.992	0.03834
				278.242	0.03657
				278.492	0.03571
				278.742	0.03354
				278.992	0.03645
				279.242	0.03518
				279.492	0.03595
				279.742	0.03468
				279.992	0.03327
				280.242	0.0354
				280.492	0.0357
				280.742	0.03482
				280.992	0.03232
				281.242	0.03615
				281.492	0.03308
				281.742	0.03306
				281.992	0.03385
				282.242	0.03533
				282.492	0.03566
				282.742	0.03327
				282.992	0.03196
				283.242	0.03057
				283.492	0.02999
				283.742	0.03031
				283.992	0.0294
				284.242	0.03032
				284.492	0.03126
				284.742	0.03449
				284.992	0.03224
				285.242	0.0338
				285.492	0.03025
				285.742	0.03099
				285.992	0.03095
				286.242	0.03178
				286.492	0.02932
				286.742	0.03369
				286.99	0.03267
				287.242	0.02986
				287.492	0.03104
				287.742	0.03247
				287.992	0.03239
				288.242	0.032
				288.492	0.02953
				288.742	0.03285
				288.992	0.03356
				289.242	0.03018
				289.492	0.03226
				289.742	0.0276
				289.992	0.02873
				290.242	0.03165
				290.49	0.02963
				290.742	0.03031
				290.99	0.02785
				291.242	0.02765
				291.49	0.02954
				291.742	0.02862
				291.992	0.02805
				292.242	0.02725
				292.49	0.0308
				292.742	0.02953
				292.992	0.03173
				293.242	0.0256
				293.492	0.02861
				293.742	0.02526
				293.992	0.02953
				294.242	0.02838
				294.49	0.02803
				294.74	0.0284
				294.99	0.02689
				295.24	0.02967
				295.49	0.02695
				295.742	0.02892
				295.99	0.02796
				296.242	0.02897
				296.49	0.02973
				296.742	0.02843
				296.99	0.03008
				297.242	0.02598
				297.492	0.02627
				297.742	0.02795
				297.992	0.02656
				298.242	0.02942
				298.49	0.02849
				298.74	0.02656
				298.99	0.02967
				299.24	0.02702
				299.49	0.02754
				299.74	0.026
				299.99	0.02963
				300.24	0.02735
				300.49	0.02682
				300.74	0.02801
				300.99	0.02904
				301.242	0.02822
				301.492	0.02741
				301.742	0.02626
				301.99	0.02557
				302.242	0.0291
				302.49	0.02694
				302.74	0.02906
				302.99	0.02719
				303.24	0.02831
				303.49	0.02816
				303.74	0.02911
				303.99	0.02685
				304.24	0.02608
				304.49	0.02122
				304.74	0.02058
				304.992	0.0237
				305.24	0.02062
				305.492	0.0189
				305.74	0.01964
				305.99	0.0175
				306.24	0.01738
				306.49	0.01731
				306.74	0.01594
				306.99	0.01554
				307.24	0.01878
				307.49	0.01637
				307.74	0.0127
				307.99	0.01719
				308.24	0.01348
				308.49	0.01113
				308.74	0.01482
				308.99	0.00967
				309.24	0.00958
				309.492	0.01152
				309.74	0.01284
				309.99	0.00954
				310.24	0.01099
				310.49	0.01219
				310.74	0.01025
				310.99	0.00981
				311.24	0.0091
				311.49	0.01146
				311.74	0.0139
				311.99	0.00602
				312.24	0.00839
				312.49	0.006
				312.74	0.00893
				312.99	0.00952
				313.24	0.00954
				313.49	0.0091
				313.74	0.00746
				313.99	0.00756
				314.24	0.00734
				314.49	0.01004
				314.74	0.00877
				314.99	0.00852
				315.24	0.009
				315.49	0.0032
				315.74	0.0045
				315.99	0.00186
				316.24	0.00571
				316.49	0.00529
				316.74	0.00722
				316.99	0.01077
				317.24	0.00514
				317.49	0.00517
				317.74	0.00424
				317.99	0.00886
				318.24	0.00038
				318.49	0.00694
				318.74	0.00749
				318.99	0.0064
				319.24	0.00504
				319.49	0.0049
				319.74	0.00741
				319.99	0.00397
				320.24	0.00299
				320.49	0.00805
				320.74	0.00202
				320.99	0.00686
				321.24	0.00486
				321.49	0.0047
				321.74	0.00168
				321.99	0.00757
				322.24	0.00728
				322.49	0.00451
				322.74	0.0048
				322.99	0.00481
				323.24	0.00605
				323.49	0.00241
				323.74	0.00227
				323.99	0.00278
				324.24	0.00627
				324.49	0.00593
				324.74	0.006
				324.99	0.00139
				325.24	0.00416
				325.49	0.00215
				325.74	0.00189
				325.99	0.00265
				326.24	0.00063
				326.49	-0.00093
				326.74	0.00086
				326.99	0.00147
				327.24	0.00317
				327.49	0.00375
				327.74	0.00134
				327.99	0.00582
				328.24	-0.00044
				328.49	0.00115
				328.74	0.00071
				328.99	0.00125
				329.24	0.00109
				329.49	0.00417
				329.74	0.00617
				329.99	0.00028
				330.24	0.00244
				330.49	0.00044
				330.74	0.00252
				330.99	0.00052
				331.24	0.00205
				331.49	0.00077
				331.74	-0.00012
				331.99	-0.00042
				332.24	-0.00178
				332.49	-0.00078
				332.74	0.00141
				332.99	-0.00128
				333.24	0.00044
				333.49	-4e-05
				333.74	0.0032
				333.99	0.00326
				334.24	0.00475
				334.49	-0.00251
				334.74	-0.00039
				334.99	0.00105
				335.24	-0.00054
				335.49	-0.00081
				335.74	-0.00142
				335.99	-0.00173
				336.24	-0.00428
				336.49	-0.0029
				336.74	-0.00238
				336.99	-0.00113
				337.24	-0.00473
				337.49	0.00447
				337.74	-0.00123
				337.99	-0.00131
				338.24	0.0001
				338.49	0.00329
				338.74	0.00304
				338.99	-0.00271
				339.24	-0.00257
				339.49	-0.00219
