# Supplementary material for: Fluidics system for resolving concentration-dependent effects of dissolved gases on tissue metabolism
Source: eLife. 2021 Nov 4;10:e66716. doi: 10.7554/eLife.66716 (PMC8660022; doi:10.7554/eLife.66716)
Supplement: Appendix 1—figure 4—source data 1. [file elife-66716-app1-fig4-data1.xlsx]

## Sheet: Fig. 2A
Time
	Outflow	Inflow
-137.5	118.038	143.536
-137	108.545	143.504
-136.5	108.394	143.44
-136	108.682	143.536
-135.5	108.699	143.473
-135	109.004	143.444
-134.5	109.09	143.738
-134	108.887	143.638
-133.5	108.993	143.732
-133	109.176	143.692
-132.5	109.273	143.308
-132	109.326	143.417
-131.5	109.514	143.52
-131	109.376	143.631
-130.5	109.784	143.315
-130	110.454	143.312
-129.5	110.417	143.326
-129	110.514	143.466
-128.5	110.532	143.348
-128	110.399	143.393
-127.5	110.348	143.33
-127	110.604	143.279
-126.5	110.544	143.084
-126	111.01	143.23
-125.5	111.206	142.977
-125	110.995	143.198
-124.5	111.283	143.136
-124	111.312	142.86
-123.5	111.804	143.06
-123	111.816	143.116
-122.5	111.978	142.961
-122	111.853	142.743
-121.5	112.16	142.099
-121	112.132	141.932
-120.5	112.227	141.778
-120	112.072	141.642
-119.5	112.268	141.685
-119	112.448	141.733
-118.5	112.586	141.34
-118	112.862	141.871
-117.5	113.092	141.696
-117	113.016	141.753
-116.5	113.538	141.68
-116	114.216	141.977
-115.5	114.037	141.774
-115	114.656	141.757
-114.5	114.376	141.628
-114	114.61	141.674
-113.5	114.532	141.696
-113	114.576	141.635
-112.5	114.446	141.571
-112	114.617	141.533
-111.5	114.811	141.689
-111	114.532	141.757
-110.5	114.567	141.624
-110	114.762	141.653
-109.5	114.767	141.583
-109	114.448	141.671
-108.5	115.102	141.424
-108	114.758	141.41
-107.5	114.8	141.412
-107	114.978	141.601
-106.5	115.027	141.513
-106	115.085	141.549
-105.5	114.79	141.649
-105	115.062	141.613
-104.5	114.803	141.644
-104	115.205	141.588
-103.5	115.187	141.653
-103	114.97	141.676
-102.5	115.195	141.626
-102	115.143	141.422
-101.5	115.235	141.762
-101	115.095	141.758
-100.5	115.065	141.605
-100	115.212	141.687
-99.5	115.326	141.563
-99	115.349	141.78
-98.5	115.112	141.814
-98	114.911	141.701
-97.5	114.978	141.544
-97	115.07	141.512
-96.5	114.841	141.533
-96	115.245	141.522
-95.5	115.042	141.512
-95	114.942	141.66
-94.5	115.021	141.494
-94	115.052	141.397
-93.5	115.055	141.24
-93	114.954	141.39
-92.5	115.145	141.712
-92	115.003	141.46
-91.5	115.045	141.597
-91	114.869	141.555
-90.5	114.86	141.587
-90	115.111	141.501
-89.5	114.8	141.385
-89	115.063	141.454
-88.5	114.896	141.397
-88	114.998	141.597
-87.5	114.857	141.287
-87	114.949	141.158
-86.5	115.076	141.312
-86	115.073	141.36
-85.5	114.942	141.201
-85	114.817	141.426
-84.5	114.726	141.365
-84	114.795	141.376
-83.5	114.79	141.18
-83	114.732	141.089
-82.5	114.78	141.151
-82	114.514	141.385
-81.5	114.751	141.144
-81	114.478	141.052
-80.5	114.752	141.119
-80	114.56	141.167
-79.5	114.62	141.178
-79	114.584	141.203
-78.5	114.627	140.986
-78	114.465	140.708
-77.5	114.456	140.845
-77	114.426	140.872
-76.5	114.627	141.066
-76	114.282	140.824
-75.5	114.246	140.988
-75	114.594	140.753
-74.5	114.438	140.582
-74	114.515	140.859
-73.5	114.409	140.794
-73	114.554	141.032
-72.5	114.466	140.723
-72	114.659	140.817
-71.5	114.56	140.778
-71	114.435	140.724
-70.5	114.449	140.623
-70	114.421	140.899
-69.5	114.676	140.824
-69	114.489	140.781
-68.5	114.299	140.755
-68	114.335	140.742
-67.5	114.451	140.668
-67	114.596	140.336
-66.5	114.619	140.542
-66	114.677	140.785
-65.5	114.487	140.893
-65	114.571	140.474
-64.5	114.685	140.522
-64	114.502	140.538
-63.5	114.342	140.62
-63	114.421	140.795
-62.5	114.468	140.623
-62	114.548	140.561
-61.5	114.777	140.779
-61	114.603	140.324
-60.5	114.554	140.503
-60	114.577	140.294
-59.5	114.637	140.354
-59	114.571	140.446
-58.5	114.419	140.558
-58	114.58	140.538
-57.5	114.507	140.216
-57	114.431	140.382
-56.5	114.764	140.386
-56	114.644	140.359
-55.5	114.827	140.228
-55	114.604	140.256
-54.5	114.553	140.241
-54	114.769	140.087
-53.5	114.598	140.304
-53	114.666	140.255
-52.5	114.542	140.179
-52	114.505	140.299
-51.5	114.55	140.145
-51	114.676	140
-50.5	114.548	140.073
-50	114.418	139.961
-49.5	114.416	140.048
-49	114.54	140.111
-48.5	114.596	140.136
-48	114.627	140.166
-47.5	114.613	139.908
-47	114.607	140.028
-46.5	114.508	140.196
-46	114.329	140.034
-45.5	114.624	139.847
-45	114.571	139.979
-44.5	114.781	140.122
-44	114.577	139.937
-43.5	114.504	139.779
-43	114.764	140.058
-42.5	114.509	139.998
-42	114.502	139.871
-41.5	114.626	140.108
-41	114.9	139.783
-40.5	114.791	140.009
-40	114.818	139.894
-39.5	114.711	139.967
-39	114.673	139.818
-38.5	114.928	139.737
-38	114.757	140.032
-37.5	114.619	140.074
-37	114.675	139.598
-36.5	114.765	139.891
-36	114.665	139.94
-35.5	114.703	139.676
-35	114.899	139.79
-34.5	114.882	139.654
-34	114.817	139.982
-33.5	114.688	140.099
-33	114.962	139.824
-32.5	114.61	139.7
-32	114.633	139.79
-31.5	114.761	139.884
-31	114.798	139.714
-30.5	114.81	139.744
-30	114.653	139.72
-29.5	114.877	139.526
-29	114.673	139.693
-28.5	115	139.69
-28	114.908	139.884
-27.5	114.823	139.787
-27	115.127	139.401
-26.5	114.944	139.686
-26	114.903	139.584
-25.5	114.734	139.783
-25	114.929	139.561
-24.5	114.87	139.285
-24	115.143	139.776
-23.5	114.952	139.594
-23	114.709	139.609
-22.5	114.892	139.637
-22	114.882	139.616
-21.5	114.798	139.466
-21	114.755	139.725
-20.5	114.719	139.503
-20	115.094	139.639
-19.5	115.01	139.417
-19	115.073	139.257
-18.5	114.834	139.538
-18	114.872	139.434
-17.5	114.965	139.484
-17	115.073	139.577
-16.5	114.66	139.866
-16	114.784	139.57
-15.5	114.919	139.683
-15	114.926	139.38
-14.5	114.864	139.568
-14	115.183	139.519
-13.5	114.862	139.427
-13	115.085	139.536
-12.5	115.15	139.603
-12	115.037	139.552
-11.5	115.108	139.406
-11	115.205	139.484
-10.5	115.045	139.501
-10	115.202	139.572
-9.5	115.164	139.252
-9	115.122	139.459
-8.5	115.179	139.053
-8	115.345	139.331
-7.5	115.045	139.245
-7	115.182	139.341
-6.5	115.12	139.503
-6	115.252	139.552
-5.5	114.889	139.471
-5	115.209	139.531
-4.5	115.34	139.464
-4	115.086	139.31
-3.5	115.343	139.404
-3	115.275	139.327
-2.5	115.056	139.566
-2	115.369	139.543
-1.5	115.107	139.503
-1	115.151	139.368
-0.5	114.843	139.371
0	114.788	139.471
0.5	114.277	139.556
1	113.793	139.288
1.5	112.403	139.243
2	110.389	139.297
2.5	107.66	139.396
3	104.483	139.36
3.5	101.605	139.345
4	99.695	139.304
4.5	98.66	139.241
5	98.094	139.288
5.5	97.722	139.192
6	97.402	139.44
6.5	97.539	139.171
7	97.446	139.573
7.5	97.364	139.164
8	97.301	138.931
8.5	97.012	139.353
9	96.949	139.18
9.5	96.609	139.104
10	96.407	139.199
10.5	96.351	138.829
11	96.088	139.194
11.5	96.189	139.436
12	95.845	138.964
12.5	95.549	139.051
13	95.335	139.09
13.5	95.176	138.994
14	95.185	139.129
14.5	94.862	138.752
15	94.534	138.75
15.5	94.456	139.15
16	94.388	138.913
16.5	94.368	139.027
17	93.8	138.89
17.5	93.69	139.057
18	93.653	138.932
18.5	93.512	138.757
19	93.284	139.001
19.5	93.429	138.696
20	93.142	138.896
20.5	92.853	138.796
21	92.892	139.034
21.5	92.791	138.908
22	92.687	138.761
22.5	92.297	138.866
23	92.18	139.044
23.5	92.17	138.773
24	92.226	138.685
24.5	92.172	138.939
25	91.771	139.183
25.5	91.803	138.848
26	91.728	138.882
26.5	91.567	139.018
27	91.498	138.853
27.5	91.52	138.757
28	91.251	138.957
28.5	91.421	138.892
29	91.427	138.687
29.5	91.378	139.195
30	91.235	138.705
30.5	91.249	138.748
31	91.098	138.885
31.5	91.2	138.733
32	91.134	138.836
32.5	91.284	138.745
33	90.982	139.029
33.5	91.075	138.75
34	90.912	138.936
34.5	90.849	138.841
35	91.12	138.831
35.5	90.821	138.792
36	90.753	138.883
36.5	90.854	138.74
37	90.753	138.871
37.5	90.803	138.644
38	90.565	138.692
38.5	90.894	138.553
39	90.775	138.915
39.5	90.719	138.651
40	90.752	138.736
40.5	90.607	138.589
41	90.539	138.768
41.5	90.659	138.769
42	90.595	138.675
42.5	90.633	138.575
43	90.374	138.647
43.5	90.565	138.614
44	90.457	138.745
44.5	90.434	138.368
45	90.455	138.518
45.5	90.533	138.827
46	90.609	138.542
46.5	90.612	138.806
47	90.585	138.486
47.5	90.454	138.507
48	90.518	138.68
48.5	90.478	138.493
49	90.57	138.745
49.5	90.499	138.652
50	90.526	138.425
50.5	90.427	138.45
51	90.579	138.481
51.5	90.576	138.572
52	90.561	138.293
52.5	90.448	138.439
53	90.406	138.483
53.5	90.465	138.736
54	90.347	138.451
54.5	90.484	138.514
55	90.613	138.521
55.5	90.365	138.526
56	90.37	138.261
56.5	90.45	138.525
57	90.507	138.361
57.5	90.466	138.087
58	90.439	137.264
58.5	90.403	135.413
59	90.357	132.189
59.5	90.347	126.981
60	90.531	120.618
60.5	90.548	113.475
61	90.473	105.662
61.5	90.396	97.853
62	90.13	90.49
62.5	89.519	83.484
63	88.29	77.721
63.5	86.348	72.772
64	83.723	68.455
64.5	80.193	65.041
65	76.012	62.234
65.5	71.228	59.785
66	65.762	57.906
66.5	60.308	56.152
67	54.726	54.79
67.5	49.55	53.512
68	44.912	52.446
68.5	40.499	51.459
69	36.559	50.557
69.5	33.273	49.836
70	30.31	49.092
70.5	27.656	48.417
71	25.414	47.795
71.5	23.533	47.322
72	21.932	46.749
72.5	20.473	46.184
73	19.313	45.82
73.5	18.263	45.25
74	17.372	44.907
74.5	16.575	44.498
75	15.902	44.203
75.5	15.233	43.761
76	14.73	43.463
76.5	14.225	43.146
77	13.774	42.78
77.5	13.353	42.577
78	12.942	42.249
78.5	12.597	41.926
79	12.273	41.68
79.5	11.968	41.488
80	11.66	41.197
80.5	11.372	41.049
81	11.18	40.727
81.5	10.896	40.572
82	10.692	40.331
82.5	10.489	40.175
83	10.27	40.047
83.5	10.128	39.783
84	9.955	39.622
84.5	9.799	39.497
85	9.618	39.23
85.5	9.49	39.254
86	9.356	38.972
86.5	9.226	38.86
87	9.104	38.602
87.5	8.991	38.444
88	8.887	38.44
88.5	8.78	38.137
89	8.681	38.011
89.5	8.562	37.823
90	8.498	37.713
90.5	8.429	37.661
91	8.318	37.398
91.5	8.255	37.313
92	8.138	37.242
92.5	8.068	37.069
93	7.959	36.852
93.5	7.909	36.839
94	7.78	36.699
94.5	7.742	36.492
95	7.652	36.422
95.5	7.579	36.252
96	7.489	36.173
96.5	7.447	36.133
97	7.386	35.992
97.5	7.303	35.8
98	7.265	35.691
98.5	7.191	35.661
99	7.148	35.498
99.5	7.088	35.372
100	7.015	35.386
100.5	6.956	35.148
101	6.897	35.087
101.5	6.832	35.01
102	6.834	34.93
102.5	6.776	34.868
103	6.698	34.696
103.5	6.636	34.647
104	6.624	34.604
104.5	6.575	34.467
105	6.508	34.4
105.5	6.446	34.269
106	6.426	34.24
106.5	6.397	34.135
107	6.319	34.08
107.5	6.305	33.982
108	6.277	33.888
108.5	6.235	33.797
109	6.203	33.778
109.5	6.143	33.564
110	6.124	33.566
110.5	6.068	33.547
111	6.027	33.428
111.5	5.969	33.382
112	5.948	33.144
112.5	5.927	33.213
113	5.917	33.061
113.5	5.863	33.064
114	5.83	32.919
114.5	5.793	32.915
115	5.779	32.803
115.5	5.729	32.783
116	5.672	32.677
116.5	5.644	32.651
117	5.629	32.538
117.5	5.611	32.525
118	5.539	32.419
118.5	5.552	32.335
119	5.494	32.292
119.5	5.444	32.252
120	5.432	32.129
120.5	5.406	32.149
121	5.352	32.015
121.5	5.362	31.994
122	5.328	31.909
122.5	5.282	31.906
123	5.259	31.832
123.5	5.244	31.745
124	5.209	31.664
124.5	5.182	31.701
125	5.146	31.593
125.5	5.14	31.505
126	5.129	31.537
126.5	5.082	31.43
127	5.055	31.395
127.5	5.058	31.391
128	5.007	31.323
128.5	5.014	31.291
129	4.985	31.228
129.5	4.957	31.18
130	4.958	31.143
130.5	4.918	31.054
131	4.916	31.046
131.5	4.922	31.065
132	4.862	30.971
132.5	4.838	30.937
133	4.816	30.861
133.5	4.79	30.795
134	4.764	30.8
134.5	4.777	30.732
135	4.735	30.734
135.5	4.723	30.631
136	4.725	30.665
136.5	4.665	30.536
137	4.666	30.529
137.5	4.657	30.479
138	4.62	30.483
138.5	4.632	30.389
139	4.599	30.411
139.5	4.598	30.327
140	4.581	30.291
140.5	4.56	30.279
141	4.553	30.277
141.5	4.512	30.204
142	4.521	30.164
142.5	4.49	30.151
143	4.452	30.081
143.5	4.465	30.092
144	4.427	30.063
144.5	4.4	30.069
145	4.401	30.042
145.5	4.383	30.02
146	4.398	29.94
146.5	4.381	29.965
147	4.349	29.895
147.5	4.308	29.967
148	4.324	29.851
148.5	4.314	29.839
149	4.311	29.806
149.5	4.307	29.794
150	4.268	29.75
150.5	4.306	29.647
151	4.285	29.657
151.5	4.248	29.647
152	4.236	29.583
152.5	4.24	29.617
153	4.232	29.554
153.5	4.201	29.526
154	4.204	29.473
154.5	4.168	29.385
155	4.164	29.417
155.5	4.158	29.367
156	4.115	29.38
156.5	4.128	29.372
157	4.111	29.368
157.5	4.098	29.326
158	4.097	29.26
158.5	4.05	29.232
159	4.061	29.205
159.5	4.043	29.139
160	4.046	29.099
160.5	4.021	29.068
161	4.006	29.009
161.5	4.018	29.008
162	3.975	29
162.5	3.988	28.978
163	3.946	28.987
163.5	3.96	28.991
164	3.964	28.945
164.5	3.963	28.905
165	3.913	28.872
165.5	3.911	28.842
166	3.903	28.851
166.5	3.905	28.826
167	3.892	28.789
167.5	3.847	28.774
168	3.857	28.793
168.5	3.84	28.656
169	3.828	28.717
169.5	3.849	28.642
170	3.825	28.613
170.5	3.794	28.607
171	3.798	28.584
171.5	3.798	28.523
172	3.806	28.51
172.5	3.772	28.495
173	3.756	28.465
173.5	3.75	28.427
174	3.751	28.379
174.5	3.737	28.395
175	3.749	28.368
175.5	3.709	28.321
176	3.713	28.299
176.5	3.7	28.271
177	3.68	28.297
177.5	3.678	28.246
178	3.672	28.235
178.5	3.661	28.371
179	3.649	29.15
179.5	3.63	31.335
180	3.626	35.118
180.5	3.616	40.901
181	3.616	48.026
181.5	3.606	56.04
182	3.609	64.648
182.5	3.638	72.668
183	3.719	80.614
183.5	4.01	87.39
184	4.499	93.491
184.5	5.479	98.368
185	7.009	102.573
185.5	9.313	106.089
186	12.582	108.879
186.5	16.753	111.274
187	21.656	113.001
187.5	27.165	114.564
188	33.305	115.809
188.5	39.747	117.28
189	46.031	117.92
189.5	52.109	118.666
190	57.415	119.309
190.5	62.197	120.098
191	66.408	120.815
191.5	70.095	121.196
192	73.086	121.57
192.5	75.732	122.135
193	78.068	122.62
193.5	80.222	122.813
194	81.91	123.197
194.5	83.5	123.7
195	84.504	123.82
195.5	85.546	124.285
196	86.635	124.496
196.5	87.494	124.762
197	88.415	124.931
197.5	89.257	125.176
198	90.076	125.343
198.5	90.898	125.66
199	91.576	125.969
199.5	92.062	126.286
200	92.529	126.483
200.5	93.151	126.5
201	93.443	126.581
201.5	94.004	126.669
202	94.315	127.139
202.5	94.594	127.116
203	95.131	127.268
203.5	95.425	127.459
204	95.436	127.951
204.5	96.053	127.903
205	96.156	127.686
205.5	96.331	128.094
206	96.638	128.207
206.5	96.665	128.383
207	96.816	128.421
207.5	97.193	128.56
208	97.442	128.439
208.5	97.597	128.631
209	97.694	128.791
209.5	97.939	129.14
210	98.031	128.889
210.5	98.165	129.151
211	98.48	129.515
211.5	98.538	129.164
212	98.767	129.458
212.5	98.892	129.385
213	98.821	129.493
213.5	98.998	129.317
214	99.017	129.716
214.5	99.267	129.687
215	99.38	129.948
215.5	99.566	130.037
216	99.509	129.977
216.5	99.726	129.953
217	99.739	129.988
217.5	99.642	130.332
218	99.864	130.368
218.5	100.079	130.373
219	100.085	130.509
219.5	100.033	130.537
220	100.145	130.501
220.5	100.341	130.988
221	100.446	130.89
221.5	100.471	130.767
222	100.626	130.948
222.5	100.511	130.81
223	100.794	131.078
223.5	100.766	130.835
224	100.633	130.872
224.5	100.907	131.131
225	100.774	131.427
225.5	100.787	131.248
226	100.888	131.346
226.5	101.069	131.453
227	101.212	131.496
227.5	101.145	131.428
228	101.369	131.681
228.5	101.34	131.63
229	101.145	131.743
229.5	101.307	131.766
230	101.574	131.685
230.5	101.411	131.807
231	101.67	131.864
231.5	101.633	132.025
232	101.867	131.963
232.5	101.771	132.096
233	101.841	131.826
233.5	101.866	132.001
234	101.837	132.218
234.5	101.964	131.995
235	101.875	132.211
235.5	102.039	132.316
236	102.097	132.213
236.5	102.097	132.389
237	102.03	132.436
237.5	102.476	132.236
238	102.342	132.276
238.5	102.471	132.204
239	102.489	132.386
239.5	102.57	132.487
240	102.585	132.424
240.5	102.329	132.701
241	102.38	132.726
241.5	102.556	132.963
242	102.525	132.916
242.5	102.58	132.662
243	102.623	132.681
243.5	102.384	132.651
244	102.746	132.937
244.5	102.562	132.883
245	102.652	132.965
245.5	102.638	133
246	102.892	132.833
246.5	103.011	132.86
247	102.811	133.104
247.5	102.863	132.896
248	102.963	132.945
248.5	103.255	132.888
249	102.788	133.096
249.5	103.098	132.916
250	103.098	132.982
250.5	103.058	133.069
251	103.163	133.156
251.5	103.06	133.243
252	102.994	133.265
252.5	102.868	133.163
253	102.971	133.433
253.5	103.129	133.307
254	103.175	133.119
254.5	103.162	133.151
255	103.104	133.292
255.5	103.153	133.349
256	103.097	133.209
256.5	103.2	133.27
257	103.422	133.344
257.5	103.029	133.258
258	103.363	133.298
258.5	103.413	133.436
259	103.279	133.513
259.5	103.235	133.624
260	103.429	133.288
260.5	103.288	133.599
261	103.289	133.277
261.5	103.464	133.835
262	103.571	133.537
262.5	103.247	133.409
263	103.407	133.693
263.5	103.276	133.466
264	103.411	133.303
264.5	103.394	133.734
265	103.497	133.666
265.5	103.544	133.688
266	103.517	133.697
266.5	103.451	133.771
267	103.417	133.581
267.5	103.244	133.503
268	103.327	133.697
268.5	103.5	133.633
269	103.426	133.683
269.5	103.313	133.702
270	103.731	133.954
270.5	103.58	133.831
271	103.692	133.722
271.5	103.632	133.754
272	103.583	134.052
272.5	103.455	133.737
273	103.586	133.939
273.5	103.659	133.756
274	103.485	133.801
274.5	103.727	133.904
275	103.592	133.857
275.5	103.569	133.964
276	103.605	134.061
276.5	103.419	134.034
277	103.322	133.909
277.5	103.461	134.121
278	103.595	134.056
278.5	103.435	133.803
279	103.598	134.012
279.5	103.674	133.777
280	103.469	133.932
280.5	103.556	134.034
281	103.439	134.137
281.5	103.497	133.961
282	103.592	133.806
282.5	103.703	133.885
283	103.727	133.937
283.5	103.437	133.973
284	103.772	134.145
284.5	103.703	134.074
285	103.487	133.958
285.5	103.658	133.764
286	103.684	134.034
286.5	103.648	134.142
287	103.579	134.243
287.5	103.368	134.003
288	103.432	134.072
288.5	103.331	133.99
289	103.421	133.966
289.5	103.435	133.951
290	103.371	134.219
290.5	103.362	134.165
291	103.38	134.105
291.5	103.536	133.993
292	103.377	134.045
292.5	103.479	133.97
293	103.256	134.115
293.5	103.63	134.165
294	103.553	133.97
294.5	103.444	134.037
295	103.306	134.229
295.5	103.333	134.263
296	103.549	133.921
296.5	103.429	134.066
297	103.314	134.118
297.5	103.433	133.875
298	103.389	134.088
298.5	103.433	134.214
299	103.322	134.106
299.5	103.311	134.251
300	103.363	134.079
300.5	103.226	134.292
301	103.351	134.387
301.5	103.18	134.035
302	103.264	133.998
302.5	103.132	134.081
303	103.375	134.039
303.5	103.084	134.416
304	103.35	134.138
304.5	103.226	134.132
305	103.185	134.404
305.5	103.248	134.05
306	103.087	134.209
306.5	102.958	134.267
307	103.037	134.25
307.5	103.306	134.253
308	103.129	134.219
308.5	103.302	134.378
309	103.406	134.208
309.5	104.106	134.312
310	105.233	134.067
310.5	107.66	134.607
311	110.132	134.343
311.5	113.047	134.137
312	116.493	134.113
312.5	119.477	133.921
313	122.402	133.948
313.5	124.423	134.13
314	125.924	134.015
314.5	127.052	134.077
315	127.586	134.204
315.5	127.684	133.873
316	127.996	134.118
316.5	128.235	134.091
317	128.283	134.045
317.5	128.24	134.04
318	128.354	133.905
318.5	128.467	134.226
319	128.377	134.208
319.5	128.506	133.919
320	128.708	134.062
320.5	128.736	133.971
321	128.64	134.196
321.5	128.728	134.103
322	128.699	134.253
322.5	129.024	134.307
323	128.901	134.111
323.5	128.885	134.083
324	129.05	133.997
324.5	128.749	134.138
325	129.127	134.219
325.5	128.895	134.192
326	128.932	134.175
326.5	128.921	134.29
327	129.156	134.16
327.5	129.244	134.204
328	129.206	134.201
328.5	128.934	134.201
329	128.961	133.991
329.5	129.067	134.04
330	128.684	134.382
330.5	128.89	134.209
331	129.055	134.224
331.5	128.775	134.155
332	128.588	134.072
332.5	128.724	134.373
333	129	134.284
333.5	128.851	134.309
334	128.788	134.128
334.5	128.827	134.099
335	128.838	134.077
335.5	128.848	134.304
336	128.752	134.159
336.5	129	133.882
337	129.093	134.01
337.5	129.53	134.282
338	129.917	134.219
338.5	130.319	134.132
339	130.762	134.113
339.5	130.608	134.184
340	131	134.189
340.5	131.08	134.126
341	131.35	134.235
341.5	131.674	134.331
342	131.955	134.299
342.5	132.198	134.427
343	132.213	134.223
343.5	132.545	134.228
344	132.898	134.074
344.5	132.841	134.01
345	133.122	134.169
345.5	133.389	134.064
346	132.966	134.334
346.5	133.337	134.235
347	133.463	134.165
347.5	133.594	134.206
348	133.586	134.24
348.5	133.668	134.191
349	133.724	134.238
349.5	133.876	134.394
350	133.884	134.074
350.5	133.722	134.285
351	133.81	134.361
351.5	134.073	134.089
352	133.844	134.331
352.5	133.955	134.101
353	133.984	134.341
353.5	133.631	134.282
354	134.018	134.4
354.5	133.803	134.449
355	133.795	134.206
355.5	133.756	134.312
356	134.045	134.064
356.5	133.864	134.187
357	133.797	134.399
357.5	134.168	134.147
358	133.781	134.032
358.5	133.78	134.155
359	133.982	134.263
359.5	134.085	134.465
360	133.901	134.189
360.5	133.63	134.243
361	133.91	134.064
361.5	133.839	134.177
362	133.85	134.344
362.5	134.324	134.253
363	133.977	134.336
363.5	134.045	134.029
364	134.018	134.275
364.5	134.149	134.202
365	134.033	134.229
365.5	133.942	134.192
366	134.07	134.387
366.5	133.857	134.312
367	133.955	134.167
367.5	133.776	133.401
368	133.837	131.759
368.5	133.797	128.473
369	133.884	123.826
369.5	133.847	117.511
370	133.736	110.475
370.5	133.883	102.798
371	133.867	94.958
371.5	133.673	87.458
372	133.243	80.574
372.5	132.048	74.743
373	130.558	69.719
373.5	128.304	65.387
374	125.145	61.815
374.5	121.314	59.103
375	116.377	56.688
375.5	111.003	54.704
376	105.311	53.305
376.5	99.163	51.863
377	93.497	50.69
377.5	87.792	49.676
378	82.484	48.825
378.5	77.535	47.952
379	72.927	47.184
379.5	68.897	46.695
380	65.373	45.993
380.5	62.222	45.409
381	59.464	44.941
381.5	57.186	44.418
382	55.057	43.989
382.5	53.383	43.485
383	51.848	43.158
383.5	50.582	42.817
384	49.374	42.414
384.5	48.155	42.031
385	47.266	41.784
385.5	46.534	41.436
386	45.646	41.104
386.5	45.067	40.837
387	44.418	40.543
387.5	43.673	40.383
388	43.205	39.995
388.5	42.609	39.829
389	42.019	39.569
389.5	41.604	39.377
390	41.143	39.223
390.5	40.755	39.054
391	40.344	38.74
391.5	40.025	38.618
392	39.686	38.473
392.5	39.318	38.212
393	39.01	38.084
393.5	38.778	37.837
394	38.447	37.651
394.5	38.174	37.45
395	37.991	37.331
395.5	37.558	37.166
396	37.394	37.079
396.5	37.172	36.855
397	36.978	36.769
397.5	36.958	36.616
398	36.607	36.46
398.5	36.418	36.357
399	36.192	36.201
399.5	36.058	36.039
400	35.919	36.028
400.5	35.678	35.889
401	35.521	35.775
401.5	35.354	35.687
402	35.222	35.463
402.5	35.089	35.323
403	34.911	35.249
403.5	34.865	35.148
404	34.687	35.064
404.5	34.607	34.982
405	34.399	34.811
405.5	34.326	34.778
406	34.202	34.68
406.5	34.049	34.565
407	33.979	34.479
407.5	33.809	34.441
408	33.764	34.345
408.5	33.623	34.214
409	33.452	34.14
409.5	33.431	34.042
410	33.256	34.038
410.5	33.231	33.932
411	33.102	33.894
411.5	32.981	33.726
412	32.982	33.64
412.5	32.896	33.575
413	32.604	33.515
413.5	32.67	33.42
414	32.499	33.35
414.5	32.481	33.259
415	32.375	33.282
415.5	32.361	33.211
416	32.348	33.112
416.5	32.183	33.04
417	32.239	32.963
417.5	32.015	32.909
418	31.991	32.834
418.5	31.863	32.773
419	31.795	32.815
419.5	31.819	32.741
420	31.655	32.73
420.5	31.651	32.618
421	31.559	32.492
421.5	31.539	32.438
422	31.427	32.488
422.5	31.396	32.361
423	31.37	32.363
423.5	31.339	32.331
424	31.263	32.139
424.5	31.26	32.164
425	31.129	32.19
425.5	31.123	32.099
426	30.983	32.032
426.5	31.002	32.065
427	31.029	31.95
427.5	30.906	31.988
428	30.784	31.898
428.5	30.854	31.861
429	30.805	31.891
429.5	30.727	31.799
430	30.724	31.728
430.5	30.699	31.713
431	30.623	31.681
431.5	30.571	31.591
432	30.518	31.643
432.5	30.449	31.562
433	30.475	31.611
433.5	30.401	31.563
434	30.425	31.517
434.5	30.328	31.574
435	30.402	31.616
435.5	30.341	31.517
436	30.246	31.557
436.5	30.292	31.511
437	30.187	31.43
437.5	30.184	31.46
438	30.167	31.45
438.5	30.239	31.385
439	30.224	31.393
439.5	30.12	31.354
440	30.072	31.294
440.5	30.053	31.232
441	30.035	31.252
441.5	30.104	31.2
442	30.152	31.16
442.5	30.069	31.151
443	30.032	31.145
443.5	30.08	31.117
444	30.03	31.139
444.5	29.936	31.08
445	29.967	31.028
445.5	29.938	31.062
446	29.858	30.983
446.5	29.923	30.901
447	29.83	30.99
447.5	29.823	30.899
448	29.762	30.861
448.5	29.788	30.827
449	29.732	30.901
449.5	29.803	30.839
450	29.664	30.803
450.5	29.796	30.794
451	29.636	30.753
451.5	29.587	30.748
452	29.671	30.722
452.5	29.657	30.678
453	29.613	30.698
453.5	29.632	30.692
454	29.568	30.564
454.5	29.556	30.611
455	29.546	30.614
455.5	29.494	30.644
456	29.556	30.66
456.5	29.465	30.647
457	29.447	30.604
457.5	29.387	30.56
458	29.473	30.557
458.5	29.315	30.527
459	29.369	30.533
459.5	29.44	30.483
460	29.335	30.5
460.5	29.292	30.465
461	29.269	30.469
461.5	29.295	30.523
462	29.271	30.394
462.5	29.325	30.397
463	29.283	30.437
463.5	29.297	30.351
464	29.197	30.35
464.5	29.235	30.41
465	29.305	30.355
465.5	29.231	30.305
466	29.178	30.267
466.5	29.258	30.259
467	29.207	30.251
467.5	29.116	30.303
468	29.059	30.212
468.5	29.118	30.229
469	29.108	30.308
469.5	29.105	30.183
470	29.115	30.231
470.5	29.033	30.209
471	29.048	30.195
471.5	28.991	30.179
472	28.965	30.202
472.5	28.95	30.171
473	29.014	30.165
473.5	28.959	30.198
474	28.989	30.151
474.5	28.935	30.128
475	28.95	30.078
475.5	28.948	30.092
476	28.934	30.114
476.5	28.898	30.099
477	28.913	30.039
477.5	28.858	30.095
478	28.899	30.054
478.5	28.925	30.05
479	28.882	30.017
479.5	28.896	29.954
480	28.868	29.93
480.5	28.847	29.958
481	28.785	29.89
481.5	28.886	30.045
482	28.795	30.041
482.5	28.831	29.967
483	28.802	29.943
483.5	28.75	29.92
484	28.81	29.885
484.5	28.692	29.943
485	28.82	29.916
485.5	28.821	29.903
486	28.763	29.824
486.5	28.749	29.81
487	28.736	29.843
487.5	28.769	29.799
488	28.782	29.779
488.5	28.758	29.838
489	28.683	29.781
489.5	28.717	29.754
490	28.633	29.808
490.5	28.699	29.745
491	28.588	29.757
491.5	28.651	29.707
492	28.613	29.762
492.5	28.596	29.742
493	28.591	29.689
493.5	28.598	29.717
494	28.516	29.708
494.5	28.522	29.711
495	28.548	29.603
495.5	28.55	29.649
496	28.482	29.612
496.5	28.441	29.653
497	28.531	29.572
497.5	28.522	29.652
498	28.586	29.599
498.5	28.45	29.548
499	28.456	29.583
499.5	28.478	29.516
500	28.41	29.578
500.5	28.39	29.529
501	28.422	29.461
501.5	28.399	29.55
502	28.417	29.56
502.5	28.408	29.702
503	28.409	30.459
503.5	28.28	32.416
504	28.324	36.209
504.5	28.303	41.921
505	28.289	49.201
505.5	28.267	57.463
506	28.341	65.758
506.5	28.343	74.132
507	28.603	81.854
507.5	29.096	88.733
508	30.254	94.682
508.5	32.15	99.566
509	34.934	103.632
509.5	38.846	106.993
510	43.58	109.622
510.5	49.051	111.519
511	54.946	113.298
511.5	61.306	114.867
512	67.522	115.936
512.5	73.906	116.878
513	79.721	117.811
513.5	85.239	118.706
514	90.227	119.367
514.5	94.839	119.848
515	98.958	120.386
515.5	102.067	120.985
516	105.237	121.675
516.5	107.802	121.678
517	109.845	122.016
517.5	111.875	122.714
518	113.532	122.97
518.5	114.813	123.151
519	116.092	123.818
519.5	116.996	123.773
520	118.056	124.1
520.5	119.049	124.223
521	119.783	124.856
521.5	120.034	124.928
522	120.928	125.288
522.5	121.348	125.548
523	121.72	125.532
523.5	122.556	125.666
524	122.753	125.99
524.5	123.193	126.261
525	123.751	126.013
525.5	124.074	126.432
526	124.136	126.686
526.5	124.686	126.806
527	124.818	126.892
527.5	125.403	126.936
528	125.258	127.342
528.5	125.674	127.47
529	125.747	127.486
529.5	126.257	127.568
530	126.54	127.9
530.5	126.654	127.766
531	126.779	128.097
531.5	127.298	127.998
532	126.996	128.133
532.5	127.274	128.283
533	127.773	128.489
533.5	127.763	128.741
534	127.887	128.63
534.5	128.123	128.756
535	128.449	128.843
535.5	128.228	129.111
536	128.346	129.059
536.5	128.631	129.138
537	128.998	129.559
537.5	128.724	129.367
538	128.96	129.6
538.5	128.851	129.333
539	129.063	129.675
539.5	129.493	129.657
540	129.684	129.957
540.5	129.57	129.801
541	129.556	130.039
541.5	129.486	129.99
542	129.63	130.034
542.5	129.868	130.095
543	129.901	130.154
543.5	130.299	130.365
544	130.094	130.46
544.5	130.424	130.15
545	129.929	130.38
545.5	130.315	130.419
546	130.411	130.47
546.5	130.627	130.887
547	130.65	130.57
547.5	130.696	130.693
548	130.72	130.719
548.5	130.914	130.927
549	130.817	130.833
549.5	130.911	130.94
550	130.828	130.983
550.5	130.973	130.747
551	131.35	130.943
551.5	131.199	131.25
552	131.388	131.321
552.5	131.155	130.925
553	131.318	131.065
553.5	131.452	131.344
554	131.406	131.25
554.5	131.433	131.337
555	131.363	131.377
555.5	131.5	131.41
556	131.691	131.296
556.5	131.555	131.824
557	131.776	131.675
557.5	131.97	131.531
558	131.747	131.617
558.5	132.065	131.663
559	132.055	131.602
559.5	132.031	131.698
560	132.151	131.771
560.5	132.041	131.874
561	132.171	132.168
561.5	132.043	131.836
562	132.218	132.183
562.5	132.244	132.104
563	131.997	131.978
563.5	132.329	131.897
564	132.233	132.03
564.5	132.378	132.134
565	132.391	131.885
565.5	132.61	132.174
566	132.216	131.96
566.5	132.511	132.103
567	132.373	131.992
567.5	132.682	132.096
568	132.809	132.243
568.5	132.648	132.286
569	132.882	132.312
569.5	132.787	132.336
570	132.59	132.269
570.5	132.72	132.426
571	132.774	132.277
571.5	132.861	132.484
572	132.894	132.479
572.5	132.722	132.461
573	132.583	132.587
573.5	133.115	132.642
574	133.11	132.708
574.5	133.028	132.644
575	132.919	132.527
575.5	132.655	132.577
576	133.161	132.91
576.5	132.975	132.783
577	133.073	132.636
577.5	132.841	132.774
578	133.013	132.451
578.5	133.203	132.604
579	133.151	132.761
579.5	133.035	132.656
580	133.067	132.751
580.5	133.221	132.708
581	133.157	132.746
581.5	133.268	132.948
582	133.298	132.846
582.5	133.246	132.651
583	133.288	132.878
583.5	133.357	132.706
584	133.099	132.83
584.5	133.25	132.836
585	133.468	132.796
585.5	133.512	132.86
586	133.176	133.079
586.5	133.379	133.013
587	133.104	132.93
587.5	133.802	133.089
588	133.357	132.856
588.5	133.221	132.781
589	133.266	132.783
589.5	133.448	133.079
590	133.549	133.186
590.5	133.576	133.065
591	133.424	132.94
591.5	133.434	133.102
592	133.33	133.003
592.5	133.473	132.997
593	133.604	132.913
593.5	133.214	133.121
594	133.539	133.129
594.5	133.604	133.327
595	133.45	133.03
595.5	133.572	133.112
596	133.534	133.024
596.5	133.483	133.029
597	133.49	133.288
597.5	133.812	133.228
598	134.006	133.367
598.5	133.623	133.029
599	133.411	133.072
599.5	133.731	133.33
600	133.52	133.037
600.5	133.847	133.342
601	133.758	133.127
601.5	133.667	133.137

## Sheet: Appendix Fig. 4
		H2S g	H2S aq		Time, minutes	OCR Ch3	OCR Ch4	average	SE		Time, minutes	Cyt c Ch1	Cyt c Ch2	average	SE		Cyt c Ox Ch1	Cyt c Ox Ch2	average	SE
	Time	ng/ml	uM		-29.9983	0.365908	0.353225	0.359566	0.00634125		-30.4333	74.7917	54.0571	64.4244	10.3673		14.899	-4.02664	5.43619	9.46282
	0	0	0		-29.7483	0.366158	0.354912	0.360535	0.0056225		-29.9167	72.9343	53.7013	63.3178	9.61654		16.3334	-3.87431	6.22956	10.1039
	1	0	0		-29.4983	0.366685	0.354322	0.360504	0.00618125		-29.4	71.3607	53.5517	62.4562	8.90453		16.1868	-3.58821	6.29929	9.8875
	2	0	0		-29.2483	0.36699	0.35479	0.36089	0.0061		-28.8833	69.6738	53.4811	61.5774	8.09636		16.4693	-3.48942	6.48993	9.97935
	3	0	0		-28.9983	0.366818	0.35541	0.361114	0.00570375		-28.3667	67.9542	53.2644	60.6093	7.34488		16.6744	-3.61623	6.5291	10.1453
	4	0	0		-28.7483	0.368358	0.35454	0.361449	0.00690875		-27.85	66.1554	53.2028	59.6791	6.4763		16.5014	-3.67599	6.4127	10.0887
	5	0	0		-28.4983	0.368953	0.355183	0.362067	0.006885		-27.35	64.3165	53.0491	58.6828	5.6337		16.4373	-3.94712	6.24509	10.1922
	6	0	0		-28.2483	0.369248	0.35507	0.362159	0.00708875		-26.8333	62.8199	53.0622	57.941	4.87883		15.8778	-3.85519	6.01131	9.86651
	7	0	0		-27.9983	0.368765	0.355403	0.362084	0.00668125		-26.3167	61.7966	52.8727	57.3346	4.46195		15.1592	-3.83723	5.66098	9.49821
	8	0	0		-27.7483	0.368368	0.355	0.361684	0.00668375		-25.8	61.052	52.7879	56.9199	4.13205		15.0856	-3.98678	5.54941	9.5362
	9	0	0		-27.4983	0.368275	0.353675	0.360975	0.0073		-25.2833	60.5193	52.7061	56.6127	3.90659		14.4476	-4.21161	5.118	9.32961
	10	0	0		-27.2483	0.36987	0.355708	0.362789	0.00708125		-24.7667	60.1036	52.6852	56.3944	3.70923		14.0096	-4.22833	4.89062	9.11895
	11	0	0		-26.9983	0.369845	0.35457	0.362208	0.0076375		-24.25	59.6763	52.5688	56.1226	3.55376		14.254	-4.37506	4.93948	9.31454
	12	0	0		-26.7483	0.369372	0.354582	0.361977	0.007395		-23.7333	59.354	52.5207	55.9373	3.41664		13.951	-4.47292	4.73905	9.21197
	13	0	0		-26.4983	0.369765	0.35478	0.362272	0.0074925		-23.2167	59.0738	52.5311	55.8025	3.27135		13.908	-4.34389	4.78207	9.12596
	14	0	0		-26.2483	0.36849	0.35339	0.36094	0.00755		-22.7	58.8008	52.2066	55.5037	3.29707		14.1209	-4.48907	4.8159	9.30497
	15	0	0		-25.9983	0.36803	0.35395	0.36099	0.00704		-22.2	58.6683	51.8931	55.2807	3.38764		13.9568	-4.66253	4.64712	9.30965
	16	0	0		-25.7483	0.368183	0.354585	0.361384	0.00679875		-21.6833	58.3882	51.6506	55.0194	3.36875		13.9666	-4.93424	4.51616	9.4504
	17	0	0		-25.4983	0.366347	0.3558	0.361074	0.00527375		-21.1667	58.2451	51.3653	54.8052	3.43991		13.7764	-5.08478	4.34582	9.4306
	18	0	0		-25.2483	0.366842	0.35496	0.360901	0.00594125		-20.65	58.0986	51.1467	54.6226	3.47593		13.534	-5.16082	4.18657	9.34739
	19	0	0		-24.9983	0.36708	0.354183	0.360631	0.00644875		-20.1333	57.9673	50.8758	54.4215	3.54577		13.7705	-5.20419	4.28314	9.48733
	20	0	0		-24.7483	0.367418	0.354418	0.360918	0.0065		-19.6167	57.7823	50.5827	54.1825	3.5998		13.7895	-5.2183	4.28559	9.50388
	21	0	0		-24.4983	0.36737	0.353272	0.360321	0.00704875		-19.1	57.7075	50.4408	54.0742	3.63336		13.6018	-5.25165	4.17509	9.42673
	22	0	0		-24.2483	0.36712	0.352892	0.360006	0.00711375		-18.5833	57.6466	50.0098	53.8282	3.81838		13.6184	-5.64111	3.98863	9.62974
	23	0	0		-23.9983	0.36703	0.353963	0.360496	0.00653375		-18.0667	57.4782	49.5885	53.5334	3.94486		13.6234	-5.78607	3.91867	9.70473
	24	0	0		-23.7483	0.366507	0.353022	0.359765	0.0067425		-17.55	57.333	49.4897	53.4114	3.92165		12.9003	-5.81567	3.54232	9.35798
	25	0	0		-23.4983	0.366213	0.352417	0.359315	0.0068975		-17.05	57.1237	49.3663	53.245	3.87874		13.067	-5.61842	3.7243	9.34272
	26	0	0		-23.2483	0.366082	0.35233	0.359206	0.00687625		-16.5333	57.1321	49.2838	53.2079	3.92414		12.7221	-5.34823	3.68693	9.03516
	27	0	0		-22.9983	0.36615	0.351757	0.358954	0.00719625		-16.0167	57.0196	49.3174	53.1685	3.85113		12.8837	-5.44371	3.72001	9.16372
	28	0	0		-22.7483	0.363992	0.352043	0.358017	0.005975		-15.5	56.8403	49.1867	53.0135	3.82681		13.0081	-5.44198	3.78307	9.22505
	29	0	0		-22.4983	0.365242	0.352928	0.359085	0.0061575		-14.9833	56.7792	49.1925	52.9859	3.79334		12.746	-5.47068	3.63767	9.10835
	30	0	0		-22.2483	0.365648	0.353338	0.359492	0.006155		-14.4667	56.688	49.053	52.8705	3.81749		12.325	-5.52959	3.3977	8.92729
	31	0	0		-21.9983	0.36491	0.35294	0.358925	0.005985		-13.95	56.5383	48.841	52.6896	3.84864		12.0254	-5.75066	3.13736	8.88802
	32	0	0		-21.7467	0.367425	0.351675	0.35955	0.007875		-13.4333	56.4247	48.6124	52.5186	3.90616		11.8489	-5.57199	3.13846	8.71044
	33	0	0		-21.4983	0.366727	0.35201	0.359369	0.00735875		-12.9167	56.3553	48.5413	52.4483	3.90702		11.3431	-5.62765	2.85773	8.48538
	34	0	0		-21.2483	0.36344	0.352247	0.357844	0.00559625		-12.4167	56.1674	48.4467	52.3071	3.86033		11.3184	-5.67192	2.82324	8.49517
	35	0	0		-20.9983	0.365478	0.351828	0.358653	0.006825		-11.9	56.1684	48.1739	52.1711	3.99729		11.2393	-5.7949	2.7222	8.5171
	36	0	0		-20.7483	0.364233	0.35287	0.358551	0.00568125		-11.3833	55.9826	48.1007	52.0416	3.94092		11.2771	-5.92445	2.67635	8.6008
	37	0	0		-20.4983	0.364962	0.352233	0.358598	0.006365		-10.8667	55.7913	48.0528	51.922	3.86926		10.8247	-5.61164	2.60652	8.21816
	38	0	0		-20.2483	0.367415	0.352128	0.359771	0.00764375		-10.35	55.7744	48.0307	51.9025	3.87184		10.2716	-5.58155	2.34501	7.92655
	39	0	0		-19.9983	0.366048	0.35229	0.359169	0.00687875		-9.83333	55.7273	47.7718	51.7495	3.97775		10.0146	-5.80445	2.10507	7.90952
	40	0	0		-19.7483	0.366935	0.35208	0.359507	0.0074275		-9.31667	55.5562	47.5544	51.5553	4.00091		9.80289	-6.19322	1.80483	7.99806
	41	0	0		-19.4983	0.368205	0.350878	0.359541	0.00866375		-8.8	55.4302	47.5422	51.4862	3.94396		9.80064	-5.96827	1.91618	7.88445
	42	0	0		-19.2483	0.368538	0.351235	0.359886	0.00865125		-8.28333	55.2689	47.5175	51.3932	3.87568		9.61674	-5.9599	1.82842	7.78832
	43	0	0		-18.9983	0.36869	0.350862	0.359776	0.00891375		-7.78333	55.1675	47.261	51.2142	3.95326		9.71539	-5.96338	1.87601	7.83938
	44	0	0		-18.7483	0.366673	0.350083	0.358378	0.008295		-7.26667	55.1835	47.119	51.1512	4.03223		9.63549	-5.75955	1.93797	7.69752
	45	0	0		-18.4983	0.36466	0.351373	0.358016	0.00664375		-6.75	55.0426	47.1751	51.1089	3.93375		9.29453	-5.85093	1.7218	7.57273
	46	0	0		-18.2483	0.364415	0.35062	0.357517	0.0068975		-6.23333	54.9754	46.9448	50.9601	4.01529		9.04176	-5.92879	1.55648	7.48528
	47	0	0		-17.9983	0.363115	0.351263	0.357189	0.00592625		-5.71667	54.9193	46.7388	50.829	4.09022		9.14733	-6.27025	1.43854	7.70879
	48	0	0		-17.7483	0.365348	0.35149	0.358419	0.00692875		-5.2	54.7294	46.4718	50.6006	4.12878		8.98366	-6.43379	1.27494	7.70873
	49	0	0		-17.4983	0.36533	0.349938	0.357634	0.00769625		-4.68333	54.5362	46.4104	50.4733	4.06289		9.01702	-6.04765	1.48468	7.53234
	50	0	0		-17.2483	0.363538	0.349807	0.356673	0.006865		-4.16667	54.4743	46.4516	50.4629	4.01137		9.00171	-5.79582	1.60295	7.39876
	51	0	0		-16.9983	0.36471	0.349042	0.356876	0.00783375		-3.65	54.4389	46.3259	50.3824	4.05651		8.70479	-5.88997	1.40741	7.29738
	52	0	0		-16.7483	0.36501	0.348323	0.356666	0.00834375		-3.13333	54.3897	46.2399	50.3148	4.07493		8.76842	-5.76689	1.50077	7.26766
	53	0	0		-16.4983	0.365432	0.34816	0.356796	0.00863625		-2.63333	54.3126	46.1146	50.2136	4.09903		8.82765	-5.7972	1.51523	7.31242
	54	0	0		-16.2483	0.367285	0.347997	0.357641	0.00964375		-2.11667	54.1696	46.0743	50.1219	4.04761		8.33142	-5.80149	1.26497	7.06646
	55	0	0		-15.9983	0.367935	0.3483	0.358117	0.0098175		-1.6	53.9216	46.0274	49.9745	3.94713		7.86805	-5.51343	1.17731	6.69074
	56	0	0		-15.7483	0.368015	0.348967	0.358491	0.00952375		-1.08333	53.7943	45.7771	49.7857	4.00859		7.49578	-5.73097	0.882403	6.61338
	57	0	0		-15.4983	0.36875	0.350695	0.359722	0.0090275		-0.566667	53.694	45.5863	49.6401	4.05387		7.07271	-5.5853	0.743705	6.32901
	58	0	0		-15.2483	0.368953	0.350263	0.359608	0.009345		-0.05	53.6531	45.6048	49.6289	4.02415		7.26038	-5.47869	0.890845	6.36954
	59	0	0		-14.9983	0.36783	0.349452	0.358641	0.00918875		0.466667	53.4746	45.4841	49.4794	3.99526		6.94105	-5.53913	0.700964	6.24009
	60	0	0		-14.7483	0.365077	0.347747	0.356413	0.008665		0.983333	53.3899	45.5743	49.4821	3.90779		6.89031	-5.43358	0.728368	6.16195
	61	0	0		-14.4983	0.362545	0.34613	0.354337	0.0082075		1.5	53.2639	45.539	49.4014	3.86249		6.89908	-5.35072	0.774179	6.1249
	62	0	0		-14.2483	0.359607	0.34638	0.352994	0.00661375		2	53.1337	45.5245	49.3291	3.80457		6.30522	-5.16325	0.570986	5.73424
	63	0	0		-13.9983	0.359717	0.346917	0.353317	0.0064		2.51667	53.0531	45.9269	49.49	3.56309		5.81816	-4.9197	0.449228	5.36893
	64	0	0		-13.7483	0.361135	0.347752	0.354444	0.00669125		3.03333	53.0555	46.2093	49.6324	3.42313		5.92771	-4.80384	0.561936	5.36577
	65	0	0		-13.4983	0.361552	0.347075	0.354314	0.00723875		3.55	53.0841	47.1297	50.1069	2.97723		6.20151	-4.33964	0.930934	5.27057
	66	0	0		-13.2483	0.3633	0.345762	0.354531	0.00876875		4.06667	52.9789	48.4016	50.6902	2.28866		6.42074	-2.81837	1.80118	4.61955
	67	0	0		-12.9983	0.362938	0.345762	0.35435	0.0085875		4.58333	52.8811	50.1906	51.5359	1.34523		6.70722	-1.29442	2.7064	4.00082
	68	0	0		-12.7483	0.3625	0.34547	0.353985	0.008515		5.1	53.01	52.3458	52.6779	0.332109		6.43918	0.963076	3.70113	2.73805
	69	0	0		-12.4983	0.362665	0.345645	0.354155	0.00851		5.61667	53.3041	55.5421	54.4231	1.11901		6.09432	3.33541	4.71487	1.37946
	70	0	0		-12.2483	0.362427	0.346673	0.35455	0.0078775		6.13333	53.7523	58.7033	56.2278	2.47546		5.99922	6.37637	6.18779	0.188574
	71	0	0		-11.9983	0.360857	0.346585	0.353721	0.00713625		6.65	54.5095	62.4386	58.4741	3.96458		6.31352	9.52951	7.92152	1.60799
	72	0	0		-11.7483	0.359662	0.347175	0.353419	0.00624375		7.15	55.7957	66.3849	61.0903	5.29458		7.85306	12.6544	10.2538	2.4007
	73	0	0		-11.4983	0.359772	0.34634	0.353056	0.00671625		7.66667	57.5332	70.2535	63.8933	6.36014		9.47172	16.0684	12.7701	3.29836
	74	0	0		-11.2483	0.360183	0.3463	0.353241	0.00694125		8.18333	59.5682	74.3711	66.9697	7.40145		11.6942	19.9958	15.845	4.1508
	75	0	0		-10.9983	0.36082	0.345895	0.353357	0.0074625		8.7	62.1843	77.841	70.0126	7.82834		14.2855	23.3658	18.8256	4.54013
	76	0	0		-10.7483	0.360992	0.34405	0.352521	0.00847125		9.21667	65.0834	81.2641	73.1738	8.09035		17.7339	26.0379	21.8859	4.152
	77	0	0		-10.4983	0.360115	0.344365	0.35224	0.007875		9.73333	68.2786	84.1965	76.2375	7.95896		20.7843	28.6043	24.6943	3.91
	78	222.442	12.7899		-10.2483	0.357583	0.34398	0.350781	0.00680125		10.25	71.4509	86.7031	79.077	7.62608		24.5611	30.5355	27.5483	2.9872
	79	444.884	25.5799		-9.99833	0.358565	0.343595	0.35108	0.007485		10.7667	74.6542	88.3516	81.5029	6.84871		28.5196	32.1208	30.3202	1.8006
	80	667.326	38.3698		-9.74833	0.359195	0.343958	0.351576	0.00761875		11.2833	77.7762	89.6976	83.7369	5.96071		32.3978	33.2511	32.8244	0.426659
	81	889.768	51.1598		-9.49833	0.359527	0.344713	0.35212	0.0074075		11.7833	80.6875	90.7294	85.7085	5.02098		35.4577	34.1719	34.8148	0.64287
	82	1112.21	63.9497		-9.24833	0.362212	0.343825	0.353019	0.00919375		12.3	83.1128	91.3911	87.2519	4.13916		37.7695	34.8544	36.312	1.45755
	83	1334.65	76.7397		-8.99833	0.361698	0.343195	0.352446	0.00925125		12.8167	85.235	91.9251	88.58	3.34503		39.7267	35.4903	37.6085	2.11823
	84	1557.09	89.5296		-8.74833	0.362055	0.344363	0.353209	0.00884625		13.3333	86.9301	92.324	89.627	2.69693		41.1626	35.4092	38.2859	2.87669
	85	1779.54	102.32		-8.49833	0.361552	0.34351	0.352531	0.00902125		13.85	88.3469	92.8204	90.5836	2.23679		42.365	35.6388	39.0019	3.36308
	86	2001.98	115.109		-8.24833	0.36013	0.34344	0.351785	0.008345		14.3667	89.4214	93.1596	91.2905	1.86911		42.7337	36.0186	39.3761	3.35752
	87	2224.42	127.899		-7.99833	0.359983	0.343313	0.351648	0.008335		14.8833	90.3858	93.4462	91.916	1.5302		43.0253	36.2694	39.6473	3.37792
	88	2446.86	140.689		-7.74833	0.358368	0.342775	0.350571	0.00779625		15.4	90.9891	93.6032	92.2962	1.30709		43.0293	36.2446	39.637	3.39238
	89	2669.31	153.479		-7.49833	0.357077	0.341805	0.349441	0.00763625		15.9167	91.6191	93.5632	92.5912	0.972084		43.2922	36.3291	39.8107	3.48154
	90	2891.75	166.269		-7.24833	0.356997	0.34181	0.349404	0.00759375		16.4333	92.2507	93.7274	92.9891	0.738345		43.0689	36.5271	39.798	3.27093
	91	3114.19	179.059		-6.99833	0.3568	0.34069	0.348745	0.008055		16.9333	92.7621	93.7982	93.2801	0.518019		43.2808	36.3374	39.8091	3.47168
	92	3336.63	191.849		-6.74833	0.35726	0.3402	0.34873	0.00853		17.45	93.2976	94.0448	93.6712	0.373605		42.9372	36.674	39.8056	3.13157
	93	3559.07	204.639		-6.49833	0.356922	0.341425	0.349174	0.00774875		17.9667	93.6727	94.3597	94.0162	0.343534		43.077	36.6009	39.8389	3.23807
	94	3781.52	217.429		-6.24833	0.35636	0.341027	0.348694	0.00766625		18.4833	94.1982	94.4433	94.3208	0.122531		42.9819	36.5629	39.7724	3.2095
	95	4003.96	230.219		-5.99833	0.354772	0.341523	0.348147	0.006625		19	94.4715	94.4746	94.473	0.00155881		42.7503	36.9253	39.8378	2.91249
	96	4226.4	243.009		-5.74833	0.355835	0.341445	0.34864	0.007195		19.5167	94.7288	94.4554	94.5921	0.136722		42.9026	36.9822	39.9424	2.9602
	97	4448.84	255.799		-5.49833	0.356413	0.340303	0.348357	0.008055		20.0333	94.9059	94.3507	94.6283	0.277604		43.2971	36.7864	40.0418	3.25531
	98	4671.28	268.589		-5.24833	0.354492	0.340963	0.347727	0.006765		20.55	95.2329	94.4603	94.8466	0.38628		43.3511	36.9744	40.1627	3.18834
	99	4893.73	281.379		-4.99833	0.354793	0.340682	0.347738	0.007055		21.0667	95.4749	94.9441	95.2095	0.265369		43.0983	37.0918	40.095	3.00323
	100	5116.17	294.169		-4.74833	0.3527	0.340665	0.346683	0.0060175		21.5833	95.7139	95.2669	95.4904	0.223475		43.2649	37.1073	40.1861	3.0788
	101	5338.61	306.959		-4.49833	0.352928	0.3407	0.346814	0.00611375		22.0833	95.9074	95.6016	95.7545	0.152931		43.2492	37.4204	40.3348	2.91444
	102	5561.05	319.749		-4.24833	0.355723	0.340753	0.348238	0.007485		22.6	96.1207	95.6887	95.9047	0.216009		43.7128	37.289	40.5009	3.21191
	103	5783.49	332.539		-3.99833	0.354785	0.34181	0.348298	0.0064875		23.1167	96.3137	95.898	96.1058	0.20782		43.6701	37.5019	40.586	3.0841
	104	6005.94	345.328		-3.74833	0.353535	0.340555	0.347045	0.00649		23.6333	96.463	96.1711	96.3171	0.145937		43.8227	37.7653	40.794	3.02873
	105	6228.38	358.118		-3.49833	0.353112	0.34	0.346556	0.00655625		24.15	96.6078	96.3417	96.4748	0.133035		43.679	37.4875	40.5832	3.09574
	106	6450.82	370.908		-3.24833	0.351653	0.33982	0.345736	0.00591625		24.6667	96.8522	96.5369	96.6945	0.157673		43.4814	37.4442	40.4628	3.0186
	107	6673.26	383.698		-2.99833	0.351793	0.33909	0.345441	0.00635125		25.1833	97.0118	96.8006	96.9062	0.105592		43.2974	37.4848	40.3911	2.90629
	108	6895.71	396.488		-2.74833	0.353388	0.340467	0.346927	0.00646		25.7	97.27	96.8456	97.0578	0.212185		43.0433	37.5824	40.3128	2.73042
	109	7118.15	409.278		-2.49833	0.354688	0.341303	0.347995	0.0066925		26.2167	97.5361	97.1339	97.335	0.201129		42.9686	37.458	40.2133	2.7553
	110	7340.59	422.068		-2.24833	0.355468	0.339842	0.347655	0.0078125		26.7167	97.606	97.1481	97.3771	0.228982		42.5426	37.4606	40.0016	2.54101
	111	7563.03	434.858		-1.99833	0.35397	0.33907	0.34652	0.00745		27.2333	97.7093	97.1522	97.4307	0.278549		42.2441	37.3459	39.795	2.44911
	112	7785.47	447.648		-1.74833	0.354453	0.33892	0.346686	0.00776625		27.75	97.8564	97.4116	97.634	0.222403		42.1315	37.5035	39.8175	2.31402
	113	8007.92	460.438		-1.49833	0.35244	0.339008	0.345724	0.00671625		28.2667	97.9974	97.5151	97.7562	0.241133		42.1235	37.1837	39.6536	2.46989
	114	8230.36	473.228		-1.24833	0.352895	0.340215	0.346555	0.00634		28.7833	98.2054	97.55	97.8777	0.3277		41.6212	37.243	39.4321	2.18907
	115	8452.8	486.018		-0.998333	0.354847	0.340017	0.347432	0.007415		29.3	98.4028	97.8955	98.1491	0.253654		41.6913	36.9455	39.3184	2.37289
	116	8675.24	498.808		-0.748333	0.35315	0.33927	0.34621	0.00694		29.8167	98.495	97.9275	98.2112	0.283763		41.5137	36.6845	39.0991	2.41464
	117	8897.68	511.598		-0.498333	0.35415	0.338102	0.346126	0.00802375		30.3333	98.7279	98.1538	98.4408	0.287046		41.7873	36.994	39.3906	2.39663
	118	9120.13	524.388		-0.248333	0.352555	0.337595	0.345075	0.00748		30.85	98.847	98.3914	98.6192	0.227833		41.8654	36.8121	39.3388	2.52666
	119	9342.57	537.178		0.00166667	0.35278	0.337267	0.345024	0.00775625		31.3667	98.9389	98.2177	98.5783	0.360603		41.7338	37.0546	39.3942	2.33961
	120	9565.01	549.968		0.251667	0.352743	0.337438	0.34509	0.0076525		31.8667	99.12	98.134	98.627	0.492965		41.6974	37.1532	39.4253	2.27209
	121	4782.51	274.984		0.501667	0.352583	0.338325	0.345454	0.00712875		32.3833	99.2622	98.2301	98.7461	0.516043		41.8063	37.2153	39.5108	2.29549
	122	2391.25	137.492		0.751667	0.352022	0.339147	0.345585	0.0064375		32.9	99.2651	98.3303	98.7977	0.46736		41.5994	37.5205	39.56	2.03942
	123	1195.63	68.7459		1.00167	0.351722	0.340082	0.345903	0.00582		33.4167	99.3274	98.3014	98.8144	0.512987		41.6912	37.9159	39.8035	1.88765
	124	597.813	34.373		1.25167	0.3532	0.34098	0.34709	0.00611		33.9333	99.2836	98.2503	98.7669	0.516672		41.9837	37.9081	39.9459	2.03776
	125	298.907	17.1865		1.50167	0.352158	0.341317	0.346738	0.00542		34.45	99.3285	97.8679	98.5982	0.730261		41.4237	38.2812	39.8525	1.57125
	126	149.453	8.59324		1.75167	0.352515	0.341243	0.346879	0.00563625		34.9667	99.4496	97.9731	98.7113	0.738219		41.361	38.7269	40.0439	1.31701
	127	74.7266	4.29662		2.00167	0.351827	0.34171	0.346769	0.00505875		35.4833	99.3589	97.6798	98.5194	0.839507		40.4565	38.6912	39.5738	0.88263
	128	37.3633	2.14831		2.25167	0.349835	0.341133	0.345484	0.00435125		36	99.2678	97.5081	98.3879	0.879856		40.4977	38.7641	39.6309	0.866788
	129	18.6817	1.07416		2.50167	0.350257	0.342658	0.346457	0.0038		36.5	99.1447	97.4341	98.2894	0.855295		40.616	38.9183	39.7671	0.848816
	130	9.34083	0.537078		2.75167	0.349367	0.345727	0.347548	0.00182		37.0167	99.0339	97.2767	98.1553	0.878618		40.5243	38.9525	39.7384	0.785866
	131	4.67042	0.268539		3.00167	0.350785	0.349573	0.350179	0.00060625		37.5333	98.9532	96.997	97.9751	0.978091		40.4771	39.2139	39.8455	0.631615
	132	2.33521	0.134269		3.25167	0.353042	0.353228	0.353135	9.25e-05		38.05	98.8371	96.7132	97.7752	1.06196		40.3893	38.9316	39.6604	0.72886
	133	1.1676	0.0671347		3.50167	0.353417	0.357317	0.355367	0.00195		38.5667	98.839	96.396	97.6175	1.22148		40.1189	39.1646	39.6417	0.47714
	134	0.583802	0.0335674		3.75167	0.353	0.362622	0.357811	0.00481125		39.0833	98.7926	96.3686	97.5806	1.21199		40.048	39.3543	39.7012	0.346836
	135	0.291901	0.0167837		4.00167	0.351472	0.370043	0.360758	0.009285		39.6	98.5961	96.4955	97.5458	1.0503		40.4375	39.4639	39.9507	0.486817
	136	0.14595	0.00839184		4.25167	0.349232	0.378913	0.364073	0.01484		40.1167	98.4495	96.1276	97.2886	1.16091		40.4122	39.4898	39.951	0.461216
	137	0.0729752	0.00419592		4.50167	0.348718	0.389635	0.369176	0.0204587		40.6333	98.5478	96.1715	97.3596	1.18816		40.616	39.574	40.095	0.520992
	138	0.0364876	0.00209796		4.75167	0.349313	0.400528	0.37492	0.0256075		41.15	98.5689	96.0193	97.2941	1.27482		40.6246	40.1267	40.3756	0.248933
	139	0.0182438	0.00104898		5.00167	0.348535	0.411938	0.380236	0.0317013		41.65	98.6073	95.5783	97.0928	1.51452		40.4509	40.3628	40.4068	0.0440273
	140	0.0091219	0.00052449		5.25167	0.349898	0.425878	0.387888	0.03799		42.1667	98.5289	95.5709	97.0499	1.479		40.3766	40.5604	40.4685	0.0919278
	141	0.00456095	0.000262245		5.50167	0.348903	0.439818	0.39436	0.0454575		42.6833	98.4006	95.3867	96.8937	1.50696		40.3202	40.7534	40.5368	0.2166
	142	0.00228048	0.000131122		5.75167	0.350527	0.453873	0.4022	0.0516725		43.2	98.4201	95.1081	96.7641	1.65601		40.1995	41.2266	40.713	0.513588
	143	0.00114024	6.55612e-05		6.00167	0.354243	0.469323	0.411783	0.05754		43.7167	98.2726	95.0227	96.6477	1.62495		39.9498	41.1047	40.5272	0.577422
	144	0.000570119	3.27806e-05		6.25167	0.355058	0.484353	0.419705	0.0646475		44.2333	98.1344	94.667	96.4007	1.73372		39.2384	41.1165	40.1775	0.939054
	145	0.00028506	1.63903e-05		6.50167	0.358505	0.49912	0.428812	0.0703075		44.75	98.1064	94.2746	96.1905	1.91588		39.3675	41.1433	40.2554	0.887931
	146	0.00014253	8.19516e-06		6.75167	0.358487	0.51394	0.436214	0.0777263		45.2667	98.1273	94.5066	96.3169	1.81035		39.4696	41.108	40.2888	0.819203
	147	7.12649e-05	4.09758e-06		7.00167	0.359378	0.527208	0.443293	0.083915		45.7833	97.9258	94.1018	96.0138	1.91198		39.4761	41.4067	40.4414	0.965329
	148	3.56324e-05	2.04879e-06		7.25167	0.36345	0.537813	0.450631	0.0871813		46.2833	97.9125	93.9952	95.9538	1.95861		39.4059	41.2175	40.3117	0.905797
	149	1.78162e-05	1.02439e-06		7.50167	0.366783	0.548728	0.457755	0.0909725		46.8	97.7989	94.0878	95.9433	1.85552		39.3076	40.9559	40.1317	0.824156
	150	8.90811e-06	5.12197e-07		7.75167	0.37361	0.557793	0.465701	0.0920912		47.3167	97.707	93.9297	95.8183	1.88865		38.9955	40.6071	39.8013	0.805754
	151	4.45406e-06	2.56099e-07		8.00167	0.37688	0.565878	0.471379	0.0944987		47.8333	97.719	93.8681	95.7936	1.92545		38.6882	40.4273	39.5578	0.869565
	152	2.22703e-06	1.28049e-07		8.25167	0.381947	0.57642	0.479184	0.0972362		48.35	97.7047	93.8747	95.7897	1.91503		38.6824	40.2279	39.4551	0.772743
	153	1.11351e-06	6.40247e-08		8.50167	0.386338	0.583377	0.484858	0.09852		48.8667	97.8051	93.8764	95.8407	1.96434		38.5698	40.2433	39.4065	0.836718
	154	5.56757e-07	3.20123e-08		8.75167	0.39323	0.591782	0.492506	0.0992762		49.3833	97.8506	93.8241	95.8374	2.01324		38.9782	40.2815	39.6298	0.651643
	155	2.78378e-07	1.60062e-08		9.00167	0.403528	0.5978	0.500664	0.0971363		49.9	97.9215	93.7571	95.8393	2.0822		38.6514	40.8445	39.748	1.09655
	156	1.39189e-07	8.00308e-09		9.25167	0.414225	0.60328	0.508753	0.0945275		50.4167	97.8535	93.3661	95.6098	2.24367		38.4066	40.8638	39.6352	1.22856
	157	6.95946e-08	4.00154e-09		9.50167	0.426162	0.608065	0.517114	0.0909513		50.9167	97.7518	93.4713	95.6116	2.14026		38.0984	40.832	39.4652	1.36681
	158	3.47973e-08	2.00077e-09		9.75167	0.437523	0.612052	0.524787	0.087265		51.4333	97.6156	93.3858	95.5007	2.11494		37.452	40.8412	39.1466	1.69463
	159	1.73987e-08	1.00039e-09		10.0017	0.448697	0.617995	0.533346	0.0846488		51.95	97.5469	93.2272	95.3871	2.15981		37.3107	41.0098	39.1603	1.84953
	160	8.69933e-09	5.00193e-10		10.2517	0.460265	0.620715	0.54049	0.080225		52.4667	97.5849	93.2499	95.4174	2.1675		37.7339	41.2658	39.4999	1.76595
	161	4.34966e-09	2.50096e-10		10.5017	0.473887	0.622945	0.548416	0.0745288		52.9833	97.5292	93.1152	95.3222	2.207		37.6919	41.5525	39.6222	1.93029
	162	2.17483e-09	1.25048e-10		10.7517	0.486455	0.62462	0.555538	0.0690825		53.5	97.485	92.927	95.206	2.27901		37.1214	41.647	39.3842	2.26276
	163	1.08742e-09	6.25241e-11		11.0017	0.501483	0.624455	0.562969	0.0614862		54.0167	97.3413	92.8177	95.0795	2.2618		37.2555	41.3754	39.3154	2.05995
	164	5.43708e-10	3.1262e-11		11.2517	0.511683	0.626345	0.569014	0.0573312		54.5333	97.245	92.7505	94.9978	2.24724		37.1147	41.7611	39.4379	2.32324
	165	2.71854e-10	1.5631e-11		11.5017	0.525195	0.628563	0.576879	0.0516838		55.05	97.1957	92.738	94.9669	2.22885		36.8005	41.1936	38.997	2.19658
	166	1.35927e-10	7.81551e-12		11.7517	0.53606	0.630833	0.583446	0.0473863		55.55	97.1227	92.7645	94.9436	2.17914		36.9255	41.4763	39.2009	2.27543
	167	6.79635e-11	3.90775e-12		12.0017	0.544752	0.633565	0.589159	0.0444063		56.0667	97.1023	92.6461	94.8742	2.22805		36.7296	41.4074	39.0685	2.33893
	168	3.39817e-11	1.95388e-12		12.2517	0.55564	0.633992	0.594816	0.0391762		56.5833	97.0019	92.5102	94.7561	2.24582		36.7441	41.2502	38.9971	2.25307
	169	1.69909e-11	9.76939e-13		12.5017	0.560895	0.636358	0.598626	0.0377312		57.1	97.0512	92.4982	94.7747	2.27648		36.7644	41.5202	39.1423	2.37793
	170	8.49544e-12	4.88469e-13		12.7517	0.567715	0.636895	0.602305	0.03459		57.6167	97.0133	92.3105	94.6619	2.35141		36.5256	41.6057	39.0656	2.54001
	171	4.24772e-12	2.44235e-13		13.0017	0.57491	0.637288	0.606099	0.0311887		58.1333	97.0149	92.3195	94.6672	2.34774		36.7804	41.2246	39.0025	2.22211
	172	2.12386e-12	1.22117e-13		13.2517	0.578682	0.638378	0.60853	0.0298475		58.65	96.9277	92.2745	94.6011	2.32661		37.0464	41.0473	39.0469	2.00044
	173	1.06193e-12	6.10587e-14		13.5017	0.58651	0.638265	0.612387	0.0258775		59.1667	96.8483	92.0365	94.4424	2.40591		36.9475	41.3633	39.1554	2.2079
	174	5.30965e-13	3.05293e-14		13.7517	0.590037	0.637973	0.614005	0.0239675		59.6833	96.7775	91.8286	94.3031	2.47446		37.0768	41.2123	39.1446	2.06777
	175	2.65482e-13	1.52647e-14		14.0017	0.593282	0.638818	0.61605	0.0227675		60.2	96.7087	91.7812	94.2449	2.46377		37.0278	41.4484	39.2381	2.21031
	176	1.32741e-13	7.63233e-15		14.2517	0.5979	0.64019	0.619045	0.021145		60.7167	96.6616	91.5082	94.0849	2.57666		36.6588	41.6382	39.1485	2.48968
	177	6.63706e-14	3.81617e-15		14.5017	0.597023	0.640875	0.618949	0.0219263		61.2167	96.6892	91.1813	93.9352	2.75394		36.9325	41.7685	39.3505	2.41799
	178	3.31853e-14	1.90808e-15		14.7533	0.601787	0.642698	0.622243	0.020455		61.7333	96.6974	90.929	93.8132	2.8842		36.8246	42.2802	39.5524	2.72778
	179	1.65926e-14	9.54042e-16		15.0017	0.60513	0.64229	0.62371	0.01858		62.25	96.6256	90.8085	93.717	2.90855		36.6315	42.0475	39.3395	2.708
	180	8.29632e-15	4.77021e-16		15.2517	0.60618	0.64229	0.624235	0.018055		62.7667	96.5835	90.5584	93.571	3.01253		36.5595	42.0383	39.2989	2.73936
	181	4.14816e-15	2.3851e-16		15.5017	0.611818	0.642645	0.627231	0.0154138		63.2833	96.5501	90.4474	93.4987	3.05138		36.0966	42.1353	39.116	3.01933
	182	2.07408e-15	1.19255e-16		15.7517	0.611468	0.642463	0.626965	0.0154975		63.8	96.506	90.3826	93.4443	3.06169		36.1972	42.3182	39.2577	3.0605
	183	1.03704e-15	5.96276e-17		16.0017	0.611088	0.643915	0.627501	0.0164138		64.3167	96.5193	90.1678	93.3436	3.17574		36.2104	42.2625	39.2365	3.02608
	184	5.1852e-16	2.98138e-17		16.2517	0.614143	0.643822	0.628982	0.01484		64.8333	96.5778	90.2519	93.4149	3.16298		36.3704	42.3521	39.3613	2.99081
	185	2.5926e-16	1.49069e-17		16.5017	0.612745	0.643425	0.628085	0.01534		65.35	96.5081	90.0762	93.2921	3.21599		36.2061	42.5461	39.3761	3.16996
	186	1.2963e-16	7.45345e-18		16.7517	0.61512	0.644038	0.629579	0.0144588		65.85	96.5077	90.0496	93.2787	3.22908		36.2029	42.4181	39.3105	3.10759
	187	6.4815e-17	3.72673e-18		17.0017	0.616205	0.642788	0.629496	0.0132913		66.3667	96.5612	90.1901	93.3756	3.18552		35.7366	42.1427	38.9396	3.20304
	188	3.24075e-17	1.86336e-18		17.2517	0.617137	0.642945	0.630041	0.0129038		66.8833	96.5253	90.2846	93.4049	3.12033		35.798	41.9159	38.857	3.05892
	189	1.62038e-17	9.31681e-19		17.5017	0.61945	0.643718	0.631584	0.0121337		67.4	96.3599	90.0649	93.2124	3.14749		35.8979	41.9447	38.9213	3.02339
	190	8.10188e-18	4.65841e-19		17.7533	0.620197	0.64296	0.631579	0.0113813		67.9167	96.3215	90.1696	93.2455	3.07596		35.8642	42.156	39.0101	3.14592
	191	4.05094e-18	2.3292e-19		18.0017	0.62194	0.643487	0.632714	0.0107737		68.4333	96.1489	90.0049	93.0769	3.07202		35.5835	42.6295	39.1065	3.52296
	192	2.02547e-18	1.1646e-19		18.2517	0.621768	0.644363	0.633065	0.0112975		68.95	96.1209	89.7971	92.959	3.16192		35.1687	42.6467	38.9077	3.73901
	193	1.01273e-18	5.82301e-20		18.5017	0.62114	0.645868	0.633504	0.0123638		69.4667	96.0251	89.7615	92.8933	3.13183		34.8652	42.9254	38.8953	4.03008
	194	5.06367e-19	2.9115e-20		18.7517	0.620718	0.646585	0.633651	0.0129337		69.9833	95.9407	89.3757	92.6582	3.28249		34.8748	42.8607	38.8677	3.99296
	195	2.53184e-19	1.45575e-20		19.0017	0.620498	0.64673	0.633614	0.0131162		70.5	95.9518	89.1384	92.5451	3.40672		35.0126	42.7995	38.9061	3.89348
	196	1.26592e-19	7.27876e-21		19.2517	0.622472	0.646095	0.634284	0.0118112		71	95.7953	88.9001	92.3477	3.44761		35.4116	42.8509	39.1312	3.71965
	197	6.32959e-20	3.63938e-21		19.5017	0.622853	0.644835	0.633844	0.0109912		71.5167	95.5327	88.3512	91.9419	3.59073		35.4713	43.3054	39.3884	3.91705
	198	3.1648e-20	1.81969e-21		19.7517	0.62368	0.644362	0.634021	0.0103412		72.0333	95.4037	88.0408	91.7223	3.68141		35.4787	43.4995	39.4891	4.01043
	199	1.5824e-20	9.09845e-22		20.0017	0.62276	0.643707	0.633234	0.0104738		72.55	95.3009	87.83	91.5655	3.73549		35.2262	43.8396	39.5329	4.30671
	200	7.91199e-21	4.54922e-22		20.2517	0.620877	0.644443	0.63266	0.0117825		73.0667	95.1745	87.484	91.3292	3.84526		35.0853	43.9882	39.5367	4.45143
			0		20.5017	0.62227	0.644548	0.633409	0.0111388		73.5833	95.1387	87.3215	91.2301	3.90862		35.4955	43.515	39.5053	4.00971
			0		20.7517	0.62357	0.644343	0.633956	0.0103862		74.1	94.9203	87.5214	91.2209	3.69945		35.6869	43.615	39.6509	3.964
			0		21.0017	0.623587	0.644478	0.634032	0.010445		74.6167	94.8987	87.6388	91.2687	3.62992		35.6887	43.6362	39.6624	3.97376
			0		21.2517	0.625293	0.64411	0.634701	0.00940875		75.1333	94.909	87.7455	91.3273	3.58176		35.0881	43.6717	39.3799	4.29181
			0		21.5033	0.62538	0.643525	0.634453	0.0090725		75.6333	94.8294	87.6431	91.2362	3.59317		35.0197	43.7496	39.3846	4.36494
			0		21.7517	0.625208	0.643595	0.634401	0.00919375		76.15	94.9574	87.8484	91.4029	3.55447		34.2611	43.7605	39.0108	4.74967
			0		22.0017	0.62684	0.644343	0.635591	0.00875125		76.6667	95.0101	88.2406	91.6253	3.38478		34.1806	43.5548	38.8677	4.68706
			0		22.2517	0.62795	0.643517	0.635734	0.00778375		77.1833	95.0726	88.3785	91.7255	3.34705		33.9504	43.6005	38.7755	4.82503
			0		22.5033	0.627335	0.644095	0.635715	0.00838		77.7	95.2075	88.5295	91.8685	3.33899		33.7111	43.4527	38.5819	4.87081
			0		22.7517	0.626372	0.64511	0.635741	0.00936875		78.2167	95.2828	88.5765	91.9297	3.35317		33.4327	43.2322	38.3324	4.89973
			0		23.0033	0.627935	0.644158	0.636046	0.00811125		78.7333	95.3673	88.471	91.9191	3.44812		32.7166	43.7516	38.2341	5.51748
			0		23.2517	0.626672	0.644315	0.635494	0.00882125		79.25	95.5075	88.2265	91.867	3.64053		32.7965	44.2795	38.538	5.74148
			0		23.5017	0.627262	0.643598	0.63543	0.0081675		79.7667	95.5017	87.9229	91.7123	3.78938		32.6532	44.5522	38.6027	5.94946
			0		23.7517	0.627988	0.642705	0.635346	0.00735875		80.2667	95.4726	87.6922	91.5824	3.89018		32.5759	44.6272	38.6016	6.02566
			0		24.0033	0.626872	0.642887	0.63488	0.0080075		80.7833	95.7269	87.5467	91.6368	4.09011		32.3428	44.5793	38.461	6.11826
			0		24.2517	0.626025	0.643547	0.634786	0.00876125		81.3	95.7252	87.1812	91.4532	4.272		31.9213	44.5474	38.2344	6.31305
			0		24.5017	0.625725	0.644842	0.635284	0.00955875		81.8167	95.945	86.8461	91.3956	4.54947		31.8658	44.5173	38.1916	6.32575
			0		24.7517	0.624637	0.645135	0.634886	0.0102488		82.3333	96.0367	86.6342	91.3355	4.70121		31.9379	44.507	38.2224	6.28452
			0		25.0033	0.623875	0.646085	0.63498	0.011105		82.85	96.17	86.2804	91.2252	4.94481		31.9915	44.5937	38.2926	6.30112
			0		25.2517	0.625752	0.646015	0.635884	0.0101313		83.3667	96.2733	86.2701	91.2717	5.00157		31.8063	44.6169	38.2116	6.40528
			0		25.5033	0.625125	0.646045	0.635585	0.01046		83.8833	96.5017	86.1928	91.3473	5.15447		31.964	44.577	38.2705	6.3065
			0		25.7517	0.624432	0.646925	0.635679	0.0112463		84.4	96.7167	86.112	91.4144	5.30236		31.6249	43.9376	37.7812	6.15634
			0		26.0033	0.625668	0.648145	0.636906	0.0112387		84.9167	96.9115	86.2937	91.6026	5.30893		31.7665	43.8038	37.7852	6.01866
			0		26.2517	0.624422	0.647615	0.636019	0.0115962		85.4167	97.1187	86.5118	91.8152	5.30342		32.0529	44.0192	38.036	5.98315
			0		26.5033	0.624847	0.64692	0.635884	0.0110363		85.9333	97.096	86.7946	91.9453	5.15069		32.2309	44.108	38.1694	5.93855
			0		26.7517	0.62694	0.647982	0.637461	0.0105212		86.45	97.1225	86.7385	91.9305	5.19203		33.2775	44.0453	38.6614	5.3839
			0		27.0033	0.625443	0.646622	0.636033	0.01059		86.9667	97.0568	86.8497	91.9533	5.10354		33.8666	44.0622	38.9644	5.09785
			0		27.2517	0.625343	0.648023	0.636683	0.01134		87.4833	96.9933	87.0616	92.0274	4.96586		34.3453	43.9655	39.1554	4.81007
			0		27.5033	0.62409	0.647855	0.635973	0.0118825		88	96.7142	87.2013	91.9577	4.75644		35.1948	43.8248	39.5098	4.31501
			0		27.7517	0.623905	0.64618	0.635042	0.0111375		88.5167	96.4759	87.0904	91.7831	4.69278		36.1428	44.0253	40.084	3.94126
			0		28.0033	0.624653	0.645428	0.63504	0.0103875		89.0333	95.9742	87.1752	91.5747	4.3995		36.6541	44.3377	40.4959	3.84183
			0		28.2517	0.623727	0.646705	0.635216	0.0114887		89.55	95.4984	87.2424	91.3704	4.12799		37.4354	44.7448	41.0901	3.65472
			0		28.5033	0.62444	0.647813	0.636126	0.0116863		90.0667	95.0591	87.2061	91.1326	3.9265		37.6719	45.3313	41.5016	3.82968
			0		28.7517	0.623853	0.647515	0.635684	0.0118312		90.5667	94.4454	87.0724	90.7589	3.68652		37.9554	45.5712	41.7633	3.80792
			0		29.0033	0.62292	0.64849	0.635705	0.012785		91.0833	93.6084	86.8016	90.205	3.40343		38.8991	46.4878	42.6934	3.79435
			0		29.2517	0.623595	0.646998	0.635296	0.0117013		91.6	92.796	86.6569	89.7264	3.06956		39.2775	47.5293	43.4034	4.12591
			0		29.5033	0.623925	0.646293	0.635109	0.0111837		92.1167	91.7498	86.1808	88.9653	2.78449		40.1186	48.6641	44.3914	4.27277
			0		29.7517	0.623623	0.647525	0.635574	0.0119513		92.6333	90.5572	85.3871	87.9722	2.58502		40.5315	49.6584	45.095	4.56346
			0		30.0033	0.624372	0.647245	0.635809	0.0114362		93.15	89.3231	84.6733	86.9982	2.3249		41.0398	50.8948	45.9673	4.92752
			0		30.2517	0.623875	0.646783	0.635329	0.0114538		93.6667	87.8539	83.8066	85.8302	2.02363		41.1782	51.7936	46.4859	5.30772
			0		30.5033	0.62401	0.648212	0.636111	0.0121013		94.1833	86.3741	82.6847	84.5294	1.84471		41.9645	52.9233	47.4439	5.47939
			0		30.7517	0.62273	0.646742	0.634736	0.0120062		94.7	84.7089	81.2421	82.9755	1.73342		42.7191	53.9154	48.3172	5.59815
			0		31.0033	0.622427	0.64784	0.635134	0.0127063		95.2167	82.8073	79.7296	81.2685	1.53884		43.6375	54.5896	49.1135	5.47606
			0		31.2517	0.622232	0.64794	0.635086	0.0128537		95.7167	80.9109	78.0589	79.4849	1.42601		44.438	55.8235	50.1308	5.69274
			0		31.5033	0.622485	0.646288	0.634386	0.0119012		96.2333	78.9688	76.4292	77.699	1.26981		44.6923	56.0736	50.383	5.69067
			0		31.7517	0.624152	0.647483	0.635818	0.011665		96.75	76.9162	74.6987	75.8074	1.10875		45.009	56.7099	50.8595	5.85043
			0		32.0033	0.624	0.646467	0.635234	0.0112337		97.2667	74.9495	72.6582	73.8038	1.14562		45.1893	57.1263	51.1578	5.96853
			0		32.2517	0.626883	0.646455	0.636669	0.00978625		97.7833	73.1812	70.88	72.0306	1.1506		46.191	57.7033	51.9472	5.75611
			0		32.5033	0.626962	0.6473	0.637131	0.0101688		98.3	71.3679	69.0527	70.2103	1.15761		46.6883	58.2132	52.4508	5.76245
			0		32.7517	0.625883	0.646373	0.636127	0.010245		98.8167	69.8203	67.1069	68.4636	1.35669		47.9681	59	53.484	5.51593
			0		33.0017	0.62709	0.64626	0.636675	0.009585		99.3333	68.2456	65.51	66.8778	1.36781		48.8784	59.1978	54.0381	5.15968
			0		33.2517	0.62482	0.645795	0.635308	0.0104875		99.85	66.8495	63.7006	65.275	1.57447		49.7298	59.744	54.7369	5.00708
			0		33.5033	0.623353	0.64579	0.634571	0.0112187		100.367	65.5101	62.0838	63.797	1.7132		50.5187	60.3032	55.4109	4.89226
			0		33.7517	0.623888	0.646918	0.635403	0.011515		100.867	64.2314	60.6679	62.4496	1.78175		51.3058	60.444	55.8749	4.56912
			0		34.0033	0.622183	0.646555	0.634369	0.0121862		101.383	63.154	59.0571	61.1055	2.04845		52.3904	61.0414	56.7159	4.32548
			0		34.2517	0.622655	0.647972	0.635314	0.0126587		101.9	62.1932	57.8289	60.0111	2.18215		53.3082	61.0984	57.2033	3.89511
			0		34.5033	0.62352	0.647365	0.635443	0.0119225		102.417	61.2743	56.9673	59.1208	2.1535		54.2103	61.1827	57.6965	3.48622
			0		34.7517	0.625095	0.645998	0.635546	0.0104513		102.933	60.3173	55.7573	58.0373	2.28003		54.7965	61.5759	58.1862	3.38969
			0		35.0033	0.624507	0.64685	0.635679	0.0111712		103.45	59.6762	54.724	57.2001	2.47607		55.1585	61.8929	58.5257	3.36721
			0		35.2517	0.624613	0.64476	0.634686	0.0100737		103.967	58.7792	53.8798	56.3295	2.44967		55.7869	62.0724	58.9297	3.14274
			0		35.5033	0.62414	0.644505	0.634323	0.0101825		104.483	58.1037	52.7313	55.4175	2.68619		56.2785	61.7804	59.0295	2.75097
			0		35.7517	0.622472	0.644425	0.633449	0.0109763		105	57.3798	52.0033	54.6915	2.68824		56.5857	62.1034	59.3445	2.75884
			0		36.0033	0.6239	0.644285	0.634092	0.0101925		105.5	56.8513	50.9924	53.9219	2.92947		56.982	62.306	59.644	2.66197
			0		36.2517	0.622622	0.6445	0.633561	0.0109388		106.017	56.3359	50.1677	53.2518	3.0841		57.2075	62.4355	59.8215	2.61404
			0		36.5033	0.623158	0.644055	0.633606	0.0104488		106.533	55.7921	49.4613	52.6267	3.16542		57.3725	62.8866	60.1296	2.75707
			0		36.7517	0.624753	0.644883	0.634818	0.010065		107.05	55.4198	48.568	51.9939	3.42586		57.7552	63.2713	60.5133	2.75805
			0		37.0033	0.624472	0.644462	0.634467	0.009995		107.567	54.9677	47.7593	51.3635	3.60418		58.1478	63.7855	60.9666	2.81886
			0		37.2517	0.623088	0.64416	0.633624	0.0105362		108.083	54.6185	47.2916	50.955	3.66342		58.5304	64.1239	61.3271	2.79679
			0		37.5033	0.623472	0.644942	0.634208	0.010735		108.6	54.2114	46.5365	50.3739	3.83744		59.2244	64.4876	61.856	2.63161
			0		37.7517	0.62154	0.64475	0.633145	0.011605		109.117	54.0542	45.978	50.0161	4.03807		59.57	64.7257	62.1479	2.57787
			0		38.0033	0.620613	0.64433	0.632471	0.0118588		109.633	53.7917	45.4299	49.6108	4.18091		60.0873	65.3448	62.716	2.62876
			0		38.2517	0.622672	0.643992	0.633332	0.01066		110.15	53.5676	44.9745	49.271	4.29655		60.142	65.3529	62.7475	2.60546
			0		38.5033	0.622537	0.643088	0.632812	0.010275		110.65	53.4488	44.3877	48.9182	4.53053		60.788	65.3412	63.0646	2.27658
			0		38.7533	0.621542	0.64178	0.631661	0.0101188		111.167	53.224	43.8117	48.5178	4.70615		61.2751	65.167	63.2211	1.94592
			0		39.0033	0.621762	0.64104	0.631401	0.00963875		111.683	53.248	43.3609	48.3044	4.94352		61.4439	65.3321	63.388	1.94413
			0		39.2517	0.620788	0.642463	0.631625	0.0108375		112.2	53.1686	43.262	48.2153	4.95328		62.0266	65.7748	63.9007	1.87409
			0		39.5033	0.619035	0.642223	0.630629	0.0115937		112.717	53.1921	43.1546	48.1734	5.01875		62.1649	65.8506	64.0078	1.84284
			0		39.7533	0.620453	0.642078	0.631265	0.0108125		113.233	53.2495	42.7659	48.0077	5.24179		62.4624	66.1912	64.3268	1.86439
			0		40.0033	0.619343	0.642432	0.630888	0.011545		113.75	53.2116	42.7502	47.9809	5.23072		62.8513	66.0861	64.4687	1.61741
			0		40.2533	0.62049	0.640775	0.630632	0.0101425		114.267	53.0985	42.7404	47.9194	5.17905		63.0321	65.6852	64.3587	1.32654
			0		40.5033	0.620402	0.639782	0.630092	0.00969		114.783	53.0861	42.8704	47.9783	5.10784		63.8795	65.883	64.8813	1.00174
			0		40.7517	0.621163	0.641235	0.631199	0.0100362		115.3	53.1937	42.8781	48.0359	5.15779		64.6057	66.0566	65.3311	0.725473
			0		41.0033	0.621893	0.640505	0.631199	0.00930625		115.8	53.2005	43.014	48.1072	5.09326		64.6902	66.1936	65.4419	0.751688
			0		41.2533	0.621652	0.640663	0.631158	0.009505		116.317	53.3761	43.0084	48.1922	5.18385		65.4874	66.1441	65.8158	0.328343
			0		41.5033	0.620495	0.64169	0.631093	0.0105975		116.833	53.3971	43.2664	48.3317	5.06532		65.8183	65.6675	65.7429	0.0754114
			0		41.7533	0.621085	0.640832	0.630959	0.00987375		117.35	53.517	43.0824	48.2997	5.21727		65.9854	65.2304	65.6079	0.377479
			0		42.0033	0.6203	0.640745	0.630522	0.0102225		117.867	53.6256	43.0451	48.3354	5.29027		66.3712	65.062	65.7166	0.654589
			0		42.2533	0.61924	0.64133	0.630285	0.011045		118.383	53.8784	43.2564	48.5674	5.31101		66.6792	64.1077	65.3935	1.28575
			0		42.5033	0.619835	0.64115	0.630493	0.0106575		118.9	54.1097	43.3007	48.7052	5.40448		67.1537	63.4791	65.3164	1.83726
			0		42.7533	0.618413	0.640258	0.629335	0.0109225		119.417	54.3582	43.2431	48.8007	5.55752		67.605	63.4336	65.5193	2.08571
			0		43.0033	0.618542	0.640387	0.629465	0.0109225		119.933	54.6839	43.1854	48.9346	5.74924		67.2055	63.1318	65.1686	2.03686
			0		43.2533	0.619352	0.639435	0.629394	0.0100413		120.433	55.039	43.0817	49.0604	5.97867		67.1939	62.4008	64.7973	2.39653
			0		43.5033	0.619817	0.638775	0.629296	0.00947875		120.95	55.3866	43.4461	49.4164	5.97024		67.0956	61.9514	64.5235	2.5721
			0		43.7533	0.618717	0.638317	0.628517	0.0098		121.467	55.8681	43.8162	49.8422	6.02593		67.1556	61.9544	64.555	2.6006
			0		44.0033	0.61933	0.638147	0.628739	0.00940875		121.983	56.3937	43.9327	50.1632	6.2305		67.5353	61.556	64.5457	2.98966
			0		44.2533	0.617827	0.637097	0.627463	0.009635		122.5	56.9441	44.2492	50.5966	6.34744		67.8628	61.1361	64.4994	3.36334
			0		44.5033	0.618147	0.637325	0.627736	0.00958875		123.017	57.4539	44.3467	50.9003	6.55358		68.1094	60.9475	64.5285	3.58096
			0		44.7533	0.618945	0.636755	0.62785	0.008905		123.533	57.7505	44.441	51.0958	6.65475		68.0851	61.2372	64.6611	3.42392
			0		45.0033	0.617333	0.636668	0.627	0.0096675		124.05	58.3065	44.7073	51.5069	6.79963		68.0116	61.1653	64.5884	3.42317
			0		45.2533	0.61776	0.636803	0.627281	0.00952125		124.567	58.8732	44.9822	51.9277	6.94549		68.3638	61.2548	64.8093	3.55452
			0		45.5033	0.616887	0.637458	0.627172	0.010285		125.067	59.3413	45.2253	52.2833	7.05802		68.6256	61.1236	64.8746	3.751
			0		45.7533	0.61462	0.637725	0.626173	0.0115525		125.583	59.641	45.9249	52.783	6.85806		69.1714	61.3649	65.2682	3.90326
			0		46.0033	0.61668	0.63696	0.62682	0.01014		126.1	59.8278	46.1122	52.97	6.85777		69.5551	61.1219	65.3385	4.21658
			0		46.2533	0.615993	0.637565	0.626779	0.0107862		126.617	59.8951	46.3122	53.1037	6.79141		70.0477	61.0986	65.5731	4.47452
			0		46.5033	0.617072	0.637767	0.62742	0.0103475		127.133	60.0474	46.22	53.1337	6.91367		70.3139	61.1783	65.7461	4.56781
			0		46.7533	0.6195	0.637837	0.628669	0.00916875		127.65	59.9414	46.266	53.1037	6.83769		70.2505	61.168	65.7092	4.54124
			0		47.0033	0.618825	0.63863	0.628727	0.0099025		128.167	60.0277	46.5058	53.2668	6.76098		70.4184	61.049	65.7337	4.6847
			0		47.2533	0.617875	0.638322	0.628099	0.0102237		128.683	60.1225	46.6757	53.3991	6.72338		70.7061	60.6717	65.6889	5.01724
			0		47.5033	0.61519	0.636008	0.625599	0.0104088		129.2	59.976	46.6397	53.3079	6.66814		70.687	61.1864	65.9367	4.75033
			0		47.7533	0.613848	0.635862	0.624855	0.0110075		129.717	59.7587	46.6875	53.2231	6.53557		70.3103	61.1614	65.7358	4.57444
			0		48.0033	0.612615	0.635065	0.62384	0.011225		130.217	59.7024	46.5726	53.1375	6.56487		70.1635	61.1629	65.6632	4.50029
			0		48.2533	0.614818	0.634768	0.624793	0.009975		130.733	59.6651	46.1744	52.9197	6.74535		69.2003	61.0766	65.1384	4.06189
			0		48.5033	0.61716	0.633785	0.625473	0.0083125		131.25	59.8064	46.007	52.9067	6.89969		68.4683	61.2173	64.8428	3.62547
			0		48.7533	0.617287	0.632378	0.624833	0.007545		131.767	59.9709	45.5942	52.7825	7.18835		67.329	61.5931	64.4611	2.86797
			0		49.0033	0.619588	0.6317	0.625644	0.00605625		132.283	60.1559	45.5146	52.8353	7.32064		66.4571	61.9457	64.2014	2.2557
			0		49.2533	0.61752	0.63163	0.624575	0.007055		132.8	60.5827	45.158	52.8704	7.71236		64.6641	61.9802	63.3222	1.34198
			0		49.5033	0.614925	0.633217	0.624071	0.00914625		133.317	61.0832	45.0593	53.0713	8.01192		62.9547	62.1359	62.5453	0.409435
			0		49.7533	0.613485	0.635207	0.624346	0.0108612		133.833	61.7721	44.9188	53.3454	8.42666		61.1177	61.9232	61.5204	0.402753
			0		50.0033	0.611553	0.636912	0.624232	0.01268		134.35	62.6681	44.9662	53.8172	8.85091		59.1987	61.3647	60.2817	1.08297
			0		50.2533	0.610315	0.636685	0.6235	0.013185		134.85	63.6541	45.0988	54.3765	9.27767		57.3871	60.9786	59.1829	1.79573
			0		50.5033	0.610738	0.637783	0.62426	0.0135225		135.367	64.6639	45.3053	54.9846	9.6793		55.24	60.71	57.975	2.73502
			0		50.7533	0.612032	0.636458	0.624245	0.0122125		135.883	65.6974	45.522	55.6097	10.0877		53.5968	60.5857	57.0913	3.49447
			0		51.0033	0.610555	0.6354	0.622977	0.0124225		136.4	66.8277	45.9064	56.3671	10.4606		51.6741	60.0749	55.8745	4.20039
			0		51.2533	0.611025	0.6361	0.623563	0.0125375		136.917	68.037	46.5856	57.3113	10.7257		49.3671	59.251	54.309	4.94198
			0		51.5033	0.61159	0.63414	0.622865	0.011275		137.433	69.1891	47.3568	58.2729	10.9162		47.2019	58.4878	52.8448	5.64296
			0		51.7533	0.61019	0.63386	0.622025	0.011835		137.95	70.3389	48.2439	59.2914	11.0475		46.3047	57.901	52.1028	5.7982
			0		52.0033	0.609368	0.634092	0.62173	0.0123625		138.467	71.3425	48.8924	60.1175	11.225		45.1879	56.9543	51.0711	5.88322
			0		52.2533	0.610245	0.634832	0.622539	0.0122937		138.983	72.4162	49.7604	61.0883	11.3279		43.6902	56.3825	50.0364	6.34616
			0		52.5033	0.610313	0.635362	0.622837	0.012525		139.483	73.2754	50.5566	61.916	11.3594		42.8924	55.7753	49.3338	6.44146
			0		52.7533	0.609625	0.63593	0.622777	0.0131525		140	74.3054	51.2277	62.7666	11.5388		41.632	55.2352	48.4336	6.80161
			0		53.0033	0.61062	0.635007	0.622814	0.0121937		140.517	75.1753	52.1554	63.6653	11.5099		40.855	54.7372	47.7961	6.94107
			0		53.2533	0.61056	0.634548	0.622554	0.0119938		141.033	76.1368	53.1129	64.6249	11.512		39.5711	54.1853	46.8782	7.30711
			0		53.5033	0.609395	0.635255	0.622325	0.01293		141.55	76.9358	53.6607	65.2982	11.6376		39.1215	53.7761	46.4488	7.32727
			0		53.7533	0.610892	0.634933	0.622912	0.01202		142.067	77.8055	54.3045	66.055	11.7505		38.7725	53.3891	46.0808	7.30827
			0		54.0033	0.610155	0.63505	0.622602	0.0124475		142.583	78.5105	54.9869	66.7487	11.7618		38.5612	52.9861	45.7736	7.21248
			0		54.2533	0.610228	0.632977	0.621603	0.011375		143.1	79.2343	55.7468	67.4906	11.7438		37.5879	52.9144	45.2512	7.66324
			0		54.5033	0.61127	0.630525	0.620898	0.0096275		143.617	79.878	56.3212	68.0996	11.7784		37.0486	52.54	44.7943	7.74567
			0		54.7533	0.610173	0.631115	0.620644	0.0104713		144.133	80.4271	56.8801	68.6536	11.7735		37.0413	52.3244	44.6828	7.64153
			0		55.0033	0.611015	0.63143	0.621223	0.0102075		144.633	81.2083	57.3556	69.282	11.9263		36.0478	52.0064	44.0271	7.97928
			0		55.2533	0.61031	0.633777	0.622044	0.0117337		145.15	81.6128	57.7971	69.705	11.9078		35.3607	51.7957	43.5782	8.2175
			0		55.5033	0.611378	0.635448	0.623413	0.012035		145.667	82.0364	58.5519	70.2942	11.7422		35.1249	51.4138	43.2693	8.14448
			0		55.7533	0.611138	0.633877	0.622507	0.01137		146.183	82.5202	58.9686	70.7444	11.7758		34.7386	50.8903	42.8145	8.07588
			0		56.0033	0.612012	0.633903	0.622958	0.010945		146.7	82.9658	59.7186	71.3422	11.6236		34.5183	50.8574	42.6879	8.16953
			0		56.2533	0.613915	0.632968	0.623441	0.00952625		147.217	83.198	60.1835	71.6907	11.5073		34.1507	50.5648	42.3577	8.20706
			0		56.5033	0.6127	0.631515	0.622108	0.0094075		147.733	83.4217	60.8538	72.1378	11.284		34.0244	49.7033	41.8638	7.83946
			0		56.7533	0.613387	0.63183	0.622609	0.00922125		148.25	83.6979	61.4383	72.5681	11.1298		33.8746	49.3677	41.6211	7.74655
			0		57.0033	0.612387	0.631953	0.62217	0.0097825		148.767	84.0603	61.8175	72.9389	11.1214		33.5016	49.5117	41.5067	8.00504
			0		57.2533	0.611785	0.630597	0.621191	0.00940625		149.267	84.2745	62.3822	73.3284	10.9462		32.7843	48.9596	40.872	8.08765
			0		57.5033	0.61165	0.630865	0.621258	0.0096075		149.783	84.3071	63.0228	73.665	10.6422		32.9017	48.5465	40.7241	7.82237
			0		57.7533	0.61049	0.63072	0.620605	0.010115		150.3	84.6728	63.4275	74.0501	10.6226		32.9443	48.3303	40.6373	7.69302
			0		58.0033	0.610245	0.630567	0.620406	0.0101613		150.817	84.9679	63.4335	74.2007	10.7672		32.1779	48.072	40.125	7.94705
			0		58.2533	0.610962	0.630768	0.620865	0.0099025		151.333	85.196	63.8281	74.5121	10.6839		32.0164	47.8502	39.9333	7.91691
			0		58.5033	0.610742	0.632368	0.621555	0.0108125		151.85	85.3049	64.0672	74.686	10.6188		31.5956	47.2083	39.4019	7.80636
			0		58.7533	0.613343	0.632127	0.622735	0.0093925		152.367	85.4316	64.3817	74.9066	10.5249		31.2844	46.9534	39.1189	7.83449
			0		59.0033	0.614583	0.631147	0.622865	0.0082825		152.883	85.7343	64.6926	75.2134	10.5208		30.5474	47.4129	38.9802	8.43278
			0		59.2533	0.613062	0.63071	0.621886	0.00882375		153.4	85.8068	64.6834	75.2451	10.5617		30.1641	47.1365	38.6503	8.48618
			0		59.5033	0.61432	0.630633	0.622476	0.00815625		153.9	86.0118	64.9623	75.487	10.5248		29.6866	46.8531	38.2698	8.58324
			0		59.7533	0.61215	0.63111	0.62163	0.00948		154.417	86.1624	64.7144	75.4384	10.724		29.7904	46.7387	38.2645	8.47416
			0		60.0033	0.612893	0.630997	0.621945	0.0090525		154.933	86.3319	64.6512	75.4916	10.8404		29.4061	46.8427	38.1244	8.71831
			0		60.2533	0.6134	0.631715	0.622557	0.0091575		155.45	86.3667	64.8445	75.6056	10.7611		29.082	46.8065	37.9443	8.86224
			0		60.5033	0.613105	0.629912	0.621509	0.00840375		155.967	86.527	65.063	75.795	10.732		29.4813	46.4464	37.9639	8.48258
			0		60.7533	0.612025	0.629908	0.620966	0.00894125		156.483	86.5836	65.0853	75.8345	10.7492		29.5777	46.4296	38.0037	8.42593
			0		61.0033	0.611747	0.631285	0.621516	0.00976875		157	86.715	65.2664	75.9907	10.7243		29.5347	46.3098	37.9222	8.38754
			0		61.2533	0.610553	0.63097	0.620761	0.0102087		157.517	86.8725	65.4266	76.1496	10.7229		29.63	45.8995	37.7647	8.13477
			0		61.5033	0.608498	0.63167	0.620084	0.0115862		158.033	87.0293	65.2826	76.156	10.8733		29.5103	45.5582	37.5343	8.02394
			0		61.7533	0.609173	0.63128	0.620226	0.0110538		158.55	87.2498	65.2816	76.2657	10.9841		29.4874	45.3644	37.4259	7.93852
			0		62.0033	0.608143	0.631223	0.619683	0.01154		159.05	87.2592	65.4242	76.3417	10.9175		29.5341	45.4253	37.4797	7.94561
			0		62.2533	0.608137	0.632915	0.620526	0.0123888		159.567	87.4924	65.5985	76.5454	10.9469		28.9776	45.7367	37.3572	8.37954
			0		62.5033	0.60907	0.63277	0.62092	0.01185		160.083	87.6003	65.6568	76.6285	10.9718		29.0605	45.8508	37.4556	8.39515
			0		62.7533	0.61007	0.635053	0.622561	0.0124913		160.6	87.7067	65.627	76.6668	11.0398		29.1228	45.4944	37.3086	8.18581
			0		63.0033	0.606532	0.634235	0.620384	0.0138513		161.117	87.6315	65.4375	76.5345	11.097		28.5209	45.5607	37.0408	8.51992
			0		63.2533	0.606428	0.63323	0.619829	0.0134012		161.633	87.6436	65.3851	76.5144	11.1293		28.0226	45.3855	36.7041	8.68145
			0		63.5033	0.603908	0.633305	0.618606	0.0146987		162.15	87.8119	65.2052	76.5086	11.3034		27.4786	45.7603	36.6195	9.1409
			0		63.7533	0.601785	0.631733	0.616759	0.0149738		162.667	87.8	64.8262	76.3131	11.4869		27.2846	46.1043	36.6944	9.40985
			0		64.0033	0.602908	0.63182	0.617364	0.0144563		163.183	87.7002	64.7458	76.223	11.4772		27.1659	46.0241	36.595	9.42912
			0		64.2533	0.602098	0.631933	0.617015	0.0149175		163.7	87.5918	64.8519	76.2218	11.3699		27.1293	46.0322	36.5808	9.45145
			0		64.5033	0.604905	0.633048	0.618976	0.0140713		164.217	87.6432	64.7322	76.1877	11.4555		27.4279	45.534	36.4809	9.05302
			0		64.7533	0.605985	0.633505	0.619745	0.01376		164.733	87.6163	64.7883	76.2023	11.414		27.3268	45.252	36.2894	8.96258
			0		65.0033	0.60564	0.635285	0.620462	0.0148225		165.233	87.4935	64.9427	76.2181	11.2754		27.0368	45.0759	36.0564	9.01957
			0		65.2533	0.607455	0.63414	0.620797	0.0133425		165.75	87.4417	64.886	76.1638	11.2779		27.0674	44.9974	36.0324	8.96498
			0		65.5033	0.605683	0.632575	0.619129	0.0134462		166.267	87.5188	64.9402	76.2295	11.2893		26.7971	45.1447	35.9709	9.17381
			0		65.7533	0.605517	0.634005	0.619761	0.0142438		166.783	87.4365	65.0783	76.2574	11.1791		27.4145	45.3183	36.3664	8.95193
			0		66.0033	0.605703	0.63087	0.618286	0.0125837		167.3	87.4342	65.1064	76.2703	11.1639		27.4129	44.8573	36.1351	8.7222
			0		66.2533	0.60393	0.632037	0.617984	0.0140537		167.817	87.5975	65.3186	76.4581	11.1395		27.0373	44.9448	35.991	8.95379
			0		66.5033	0.605352	0.633643	0.619498	0.014145		168.333	87.7533	65.3358	76.5445	11.2087		26.8635	45.1621	36.0128	9.14928
			0		66.7533	0.60359	0.632397	0.617994	0.0144037		168.85	87.9309	65.089	76.5099	11.4209		27.2899	45.2481	36.269	8.9791
			0		67.0033	0.602405	0.634557	0.618481	0.0160762		169.367	87.8909	64.9541	76.4225	11.4684		27.0049	45.6611	36.333	9.32813
			0		67.2533	0.601548	0.635743	0.618645	0.0170975		169.883	87.7555	65.0693	76.4124	11.3431		27.0863	45.6778	36.3821	9.29571
			0		67.5033	0.599813	0.635085	0.617449	0.0176362		170.4	87.8151	64.9064	76.3607	11.4544		26.7582	45.7086	36.2334	9.47522
			0		67.7533	0.60082	0.63473	0.617775	0.016955		170.9	87.7893	64.8809	76.3351	11.4542		26.6877	45.6089	36.1483	9.46061
			0		68.0033	0.602642	0.63451	0.618576	0.0159338		171.417	87.7954	64.8089	76.3021	11.4933		27.1427	45.5857	36.3642	9.22148
			0		68.2533	0.60225	0.63197	0.61711	0.01486		171.933	87.986	64.8186	76.4023	11.5837		27.0211	45.6055	36.3133	9.29219
			0		68.5033	0.602747	0.632267	0.617507	0.01476		172.45	87.8664	64.6497	76.2581	11.6084		27.4091	45.7115	36.5603	9.15121
			0		68.7533	0.602718	0.632175	0.617446	0.0147287		172.967	87.8319	64.6155	76.2237	11.6082		27.8764	45.4656	36.671	8.79461
			0		69.0033	0.60279	0.632158	0.617474	0.0146837		173.483	87.6306	64.6132	76.1219	11.5087		28.0004	45.493	36.7467	8.74628
			0		69.2533	0.602433	0.632752	0.617592	0.01516		174	87.6544	64.5389	76.0967	11.5578		27.5385	45.747	36.6428	9.10423
			0		69.5033	0.600315	0.6326	0.616457	0.0161425		174.517	87.7661	64.6627	76.2144	11.5517		27.3072	45.4086	36.3579	9.05073
			0		69.7533	0.5997	0.63208	0.61589	0.01619		175.033	87.8011	64.7944	76.2977	11.5033		27.4727	45.3325	36.4026	8.9299
			0		70.0033	0.59777	0.631438	0.614604	0.0168338		175.533	87.9623	64.8821	76.4222	11.5401		27.6105	45.1112	36.3609	8.7504
			0		70.2533	0.599255	0.631655	0.615455	0.0162		176.05	88.0606	65.0049	76.5328	11.5278		27.5388	45.3919	36.4653	8.92654
			0		70.5033	0.60071	0.631555	0.616132	0.0154225		176.567	88.1099	65.2858	76.6979	11.412		27.1111	45.0321	36.0716	8.96053
			0		70.7533	0.601152	0.631408	0.61628	0.0151275		177.083	88.038	65.2018	76.6199	11.4181		26.9802	44.631	35.8056	8.82539
			0		71.0033	0.602108	0.630795	0.616451	0.0143437		177.6	88.1614	65.2485	76.705	11.4564		26.8555	45.0251	35.9403	9.08479
			0		71.2533	0.601587	0.63006	0.615824	0.0142363		178.117	88.1179	65.3431	76.7305	11.3874		26.6697	44.7071	35.6884	9.01872
			0		71.5033	0.601575	0.629618	0.615596	0.0140213		178.633	88.3368	65.0796	76.7082	11.6286		26.6026	44.6967	35.6496	9.04702
			0		71.7533	0.603452	0.629713	0.616583	0.01313		179.15	88.2814	65.2831	76.7823	11.4991		26.3319	44.3041	35.318	8.98607
			0		72.0033	0.604415	0.62952	0.616968	0.0125525		179.667	88.3054	65.1894	76.7474	11.558		25.9075	44.6643	35.2859	9.37842
			0		72.2533	0.60529	0.629093	0.617191	0.0119013		180.167	88.3459	64.8888	76.6174	11.7286		25.6375	44.5119	35.0747	9.43717
			0		72.5033	0.605725	0.628012	0.616869	0.0111438		180.683	88.3292	64.7453	76.5372	11.7919		25.5196	44.5432	35.0314	9.5118
			0		72.7533	0.603338	0.626732	0.615035	0.0116975		181.2	88.2868	64.6584	76.4726	11.8142		25.3203	44.3986	34.8594	9.53914
			0		73.0033	0.60337	0.625522	0.614446	0.0110763		181.717	88.2835	64.3484	76.3159	11.9676		24.8718	44.6313	34.7516	9.87973
			0		73.2533	0.60088	0.62551	0.613195	0.012315		182.233	88.351	64.154	76.2525	12.0985		24.6888	44.8579	34.7734	10.0845
			0		73.5033	0.600917	0.624763	0.61284	0.0119225		182.75	88.3423	64.091	76.2167	12.1256		24.1343	44.687	34.4106	10.2764
			0		73.7533	0.603495	0.624455	0.613975	0.01048		183.267	88.3454	63.8996	76.1225	12.2229		24.1045	45.1397	34.6221	10.5176
			0		74.0033	0.604108	0.624397	0.614252	0.010145		183.783	88.2041	63.8938	76.0489	12.1551		23.9509	45.0554	34.5031	10.5522
			0		74.2533	0.605133	0.624008	0.61457	0.0094375		184.3	88.2202	63.7082	75.9642	12.256		24.4005	45.1366	34.7685	10.3681
			0		74.5033	0.605023	0.624842	0.614932	0.00991		184.8	88.2194	63.6499	75.9347	12.2848		24.9827	44.9293	34.956	9.97328
			0		74.7533	0.60217	0.623395	0.612783	0.0106125		185.317	88.2448	63.5253	75.885	12.3597		25.0107	45.5259	35.2683	10.2576
			0		75.0033	0.599183	0.623833	0.611508	0.012325		185.833	88.0983	63.2993	75.6988	12.3995		24.8019	45.6016	35.2018	10.3999
			0		75.2533	0.598845	0.624405	0.611625	0.01278		186.35	88.204	63.2478	75.7259	12.4781		24.7078	45.8037	35.2557	10.5479
			0		75.5033	0.598213	0.624352	0.611282	0.01307		186.867	88.1101	63.2673	75.6887	12.4214		25.0474	45.8957	35.4715	10.4242
			0		75.7533	0.598298	0.626565	0.612431	0.0141337		187.383	87.9863	63.4622	75.7242	12.262		25.1476	46.0541	35.6008	10.4532
			0		76.0033	0.598145	0.62758	0.612862	0.0147175		187.9	87.9472	63.4648	75.706	12.2412		24.8681	45.9945	35.4313	10.5632
			0		76.2533	0.59874	0.62633	0.612535	0.013795		188.417	87.9786	63.5289	75.7538	12.2248		24.3468	46.2307	35.2888	10.9419
			0		76.5033	0.59752	0.627262	0.612391	0.0148713		188.933	87.9746	63.3978	75.6862	12.2884		24.93	46.0121	35.471	10.541
			0		76.7533	0.59714	0.626287	0.611714	0.0145737		189.45	87.8811	63.3989	75.64	12.2411		24.3604	45.832	35.0962	10.7358
			0		77.0033	0.597398	0.625968	0.611683	0.014285		189.967	87.6385	63.2793	75.4589	12.1796		24.2752	45.7228	34.999	10.7238
			0		77.2533	0.597832	0.627672	0.612753	0.01492		190.483	87.7171	62.9884	75.3528	12.3643		24.2894	45.0847	34.6871	10.3976
			0		77.5033	0.59652	0.62726	0.61189	0.01537		190.983	87.7887	62.5421	75.1654	12.6233		24.2105	44.7603	34.4854	10.2749
			0		77.7533	0.59533	0.6282	0.611765	0.016435		191.5	87.7725	61.7485	74.7605	13.012		23.4834	44.1687	33.826	10.3427
			0		78.0033	0.59379	0.62719	0.61049	0.0167		192.017	87.8529	61.1278	74.4903	13.3625		23.2364	43.6261	33.4313	10.1948
			0		78.2533	0.591307	0.627208	0.609258	0.01795		192.533	87.7845	59.8415	73.813	13.9715		22.7809	42.8356	32.8083	10.0273
			0		78.5033	0.593128	0.626972	0.61005	0.0169225		193.05	87.5274	58.608	73.0677	14.4597		22.9146	41.689	32.3018	9.38722
			0		78.7533	0.59279	0.626428	0.609609	0.0168188		193.567	87.1948	56.7231	71.9589	15.2359		22.4854	40.2657	31.3756	8.89011
			0		79.0033	0.593672	0.625395	0.609534	0.0158613		194.083	86.9127	54.9554	70.934	15.9786		21.2861	39.4969	30.3915	9.10542
			0		79.2533	0.592078	0.623703	0.60789	0.0158125		194.6	86.4214	52.591	69.5062	16.9152		20.7354	38.2573	29.4963	8.76094
			0		79.5033	0.590392	0.62163	0.606011	0.0156188		195.117	85.6831	50.2831	67.9831	17.7		19.5767	37.2272	28.4019	8.82523
			0		79.7533	0.592093	0.6202	0.606146	0.0140538		195.617	84.4342	47.9491	66.1917	18.2425		18.7501	35.8969	27.3235	8.57337
			0		80.0033	0.592388	0.621718	0.607052	0.014665		196.133	83.0341	45.511	64.2725	18.7615		17.372	34.555	25.9635	8.59148
			0		80.2533	0.592645	0.621202	0.606924	0.0142787		196.65	81.0603	43.1132	62.0867	18.9736		16.7655	32.8286	24.7971	8.03157
			0		80.5033	0.5943	0.620485	0.607393	0.0130925		197.167	78.7865	39.9883	59.3874	19.3991		15.4442	31.2764	23.3603	7.9161
			0		80.7533	0.594372	0.620725	0.607549	0.0131763		197.683	76.2281	37.5001	56.8641	19.364		13.1903	29.289	21.2397	8.04935
			0		81.0033	0.594207	0.619312	0.60676	0.0125525		198.2	73.3519	34.6372	53.9946	19.3573		11.5859	27.8652	19.7256	8.13962
			0		81.2533	0.595423	0.618328	0.606875	0.0114525		198.717	69.83	32.1712	51.0006	18.8294		9.7403	26.2167	17.9785	8.23822
			0		81.5033	0.59357	0.619017	0.606294	0.0127237		199.233	66.0001	29.8776	47.9388	18.0613		7.93598	24.3653	16.1506	8.21465
			0		81.7533	0.59111	0.619198	0.605154	0.0140438		199.75	61.9279	27.7733	44.8506	17.0773		6.08252	22.3862	14.2343	8.15182
			0		82.0033	0.589938	0.619622	0.60478	0.0148425		200.267	57.7026	25.4816	41.5921	16.1105		3.97938	20.5673	12.2734	8.29398
			0		82.2533	0.58833	0.619587	0.603959	0.0156287		200.767	53.1878	23.3145	38.2511	14.9366		1.775	19.0241	10.3995	8.62454
			0		82.5033	0.587385	0.61993	0.603657	0.0162725		201.283	48.5175	21.2875	34.9025	13.615		0.408813	17.257	8.8329	8.42409
			0		82.7533	0.588398	0.618958	0.603678	0.01528		201.8	44.0163	19.1239	31.5701	12.4462		-1.34007	16.0879	7.37391	8.71398
			0		83.0033	0.58884	0.618065	0.603453	0.0146125		202.317	39.3551	17.5011	28.4281	10.927		-3.12933	14.6546	5.76263	8.89196
			0		83.2533	0.589043	0.619315	0.604179	0.0151363		202.833	34.8365	15.5721	25.2043	9.63221		-3.82775	13.6795	4.92588	8.75363
			0		83.5033	0.590848	0.619175	0.605011	0.0141637		203.35	30.4928	14.1222	22.3075	8.18531		-4.80215	12.4318	3.81481	8.61696
			0		83.7533	0.589995	0.619968	0.604981	0.0149862		203.867	26.637	12.7194	19.6782	6.95882		-5.72575	11.7693	3.02178	8.74753
			0		84.0033	0.590505	0.62065	0.605578	0.0150725		204.383	22.9598	11.0578	17.0088	5.95099		-6.19815	10.8694	2.33564	8.53379
			0		84.2533	0.59132	0.620905	0.606113	0.0147925		204.9	19.4556	9.44139	14.4485	5.0071		-6.43855	10.5046	2.03304	8.47159
			0		84.5033	0.589355	0.62132	0.605338	0.0159825		205.417	16.3493	8.24245	12.2959	4.05343		-6.33098	9.63068	1.64985	7.98083
			0		84.7533	0.588245	0.621088	0.604666	0.0164212		205.933	13.7622	7.06961	10.4159	3.3463		-5.32869	9.1119	1.89161	7.2203
			0		85.0033	0.588263	0.622067	0.605165	0.0169025		206.433	11.5425	5.94714	8.74481	2.79768		-4.44109	9.03022	2.29457	6.73566
			0		85.2533	0.588668	0.621233	0.60495	0.0162825		206.95	9.55997	5.28749	7.42373	2.13624		-4.001	9.18524	2.59212	6.59312
			0		85.5033	0.59027	0.62166	0.605965	0.015695		207.467	8.07651	4.41998	6.24825	1.82827		-2.99457	8.86495	2.93519	5.92976
			0		85.7533	0.592152	0.622495	0.607324	0.0151713		207.983	6.81333	3.57649	5.19491	1.61842		-2.14407	9.0649	3.46041	5.60448
			0		86.0033	0.59046	0.621908	0.606184	0.0157238		208.5	5.7976	2.97142	4.38451	1.41309		-1.26178	9.19001	3.96412	5.2259
			0		86.2533	0.589515	0.622925	0.60622	0.016705		209.017	5.10168	2.57137	3.83653	1.26515		0.0205974	8.9425	4.48155	4.46095
			0		86.5033	0.588975	0.623613	0.606294	0.0173187		209.533	4.37085	2.15513	3.26299	1.10786		0.408579	9.09816	4.75337	4.34479
			0		86.7533	0.58743	0.623903	0.605666	0.0182363		210.05	3.95922	2.30762	3.13342	0.825799		0.761014	9.44569	5.10335	4.34234
			0		87.0033	0.5883	0.623768	0.606034	0.0177337		210.567	3.55236	1.91716	2.73476	0.817598		1.63621	9.49981	5.56801	3.9318
			0		87.2533	0.58919	0.622645	0.605917	0.0167275		211.083	3.11996	1.64855	2.38425	0.735703		1.62203	9.76932	5.69568	4.07364
			0		87.5033	0.587165	0.622195	0.60468	0.017515		211.6	2.86765	1.61505	2.24135	0.626298		1.71627	9.73491	5.72559	4.00932
			0		87.7533	0.587427	0.622808	0.605117	0.01769		212.1	2.67048	1.50619	2.08833	0.582145		1.72306	9.30164	5.51235	3.78929
			0		88.0033	0.585225	0.62245	0.603838	0.0186125		212.617	2.4903	1.38554	1.93792	0.552378		2.06594	9.67484	5.87039	3.80445
			0		88.2533	0.58344	0.623853	0.603646	0.0202063		213.133	2.35442	1.49318	1.9238	0.430623		2.04631	9.70233	5.87432	3.82801
			0		88.5033	0.582662	0.62362	0.603141	0.0204788		213.65	2.28055	1.49861	1.88958	0.390972		1.83604	9.5695	5.70277	3.86673
			0		88.7533	0.579357	0.622483	0.60092	0.0215625		214.167	2.06416	1.34727	1.70572	0.358445		2.02703	9.61368	5.82035	3.79333
			0		89.0033	0.577887	0.623912	0.6009	0.0230125		214.683	2.03539	1.35452	1.69495	0.340435		2.80599	9.45351	6.12975	3.32376
			0		89.2533	0.57438	0.623258	0.598819	0.0244388		215.2	2.02505	1.03255	1.5288	0.496252		2.89613	9.31782	6.10698	3.21084
			0		89.5033	0.571122	0.621845	0.596484	0.0253612		215.717	2.05915	1.19683	1.62799	0.431161		3.02449	9.08588	6.05518	3.03069
			0		89.7533	0.568257	0.621385	0.594821	0.0265637		216.233	2.22969	1.24263	1.73616	0.49353		3.06556	8.75308	5.90932	2.84376
			0		90.0033	0.563717	0.618642	0.59118	0.0274625		216.75	2.16094	0.997116	1.57903	0.581912		2.79037	8.75351	5.77194	2.98157
			0		90.2533	0.558153	0.616762	0.587457	0.029305		217.25	2.15445	0.86041	1.50743	0.647022		3.10915	8.76799	5.93857	2.82942
			0		90.5033	0.55246	0.614877	0.583669	0.0312088		217.767	2.13356	0.850824	1.49219	0.641367		2.9588	8.63347	5.79613	2.83733
			0		90.7533	0.546995	0.612535	0.579765	0.03277		218.283	2.17585	0.807573	1.49171	0.684138		3.0441	8.12706	5.58558	2.54148
			0		91.0033	0.541345	0.609372	0.575359	0.0340138		218.8	2.02474	0.643729	1.33424	0.690507		2.94112	7.84912	5.39512	2.454
			0		91.2533	0.536837	0.605908	0.571373	0.034535		219.317	2.04393	0.699318	1.37162	0.672304		2.70886	8.04517	5.37701	2.66815
			0		91.5033	0.5313	0.601225	0.566263	0.0349625		219.833	2.03806	0.666685	1.35237	0.685689		2.24171	7.95976	5.10074	2.85903
			0		91.7533	0.52402	0.59508	0.55955	0.03553		220.35	1.91466	0.702867	1.30876	0.605896		2.44597	7.45	4.94799	2.50201
			0		92.0033	0.518778	0.591745	0.555261	0.0364837		220.867	1.86397	0.741246	1.30261	0.56136		1.98122	7.73736	4.85929	2.87807
			0		92.2533	0.512147	0.585935	0.549041	0.0368938		221.383	1.71526	0.688176	1.20172	0.513544		1.32039	7.75455	4.53747	3.21708
			0		92.5033	0.506755	0.581995	0.544375	0.03762		221.883	1.63615	0.757476	1.19681	0.439339		1.61336	7.52962	4.57149	2.95813
			0		92.7533	0.501125	0.577215	0.53917	0.038045		222.4	1.57901	0.989628	1.28432	0.294693		1.83389	7.51515	4.67452	2.84063
			0		93.0033	0.494795	0.570322	0.532559	0.0377637		222.917	1.56729	1.03215	1.29972	0.267571		1.7813	7.26783	4.52456	2.74326
			0		93.2533	0.487478	0.563797	0.525637	0.03816		223.433	1.4727	1.20513	1.33891	0.133786		2.08999	7.75435	4.92217	2.83218
			0		93.5033	0.480173	0.55583	0.518001	0.0378287		223.95	1.46116	1.11598	1.28857	0.172591		2.33203	8.33948	5.33575	3.00373
			0		93.7533	0.474382	0.54941	0.511896	0.0375137		224.467	1.48827	1.03809	1.26318	0.22509		2.34665	8.27492	5.31079	2.96414
			0		94.0033	0.467235	0.542972	0.505104	0.0378687		224.983	1.48383	0.977824	1.23082	0.253001		2.14963	8.38815	5.26889	3.11926
			0		94.2533	0.461383	0.53598	0.498681	0.0372987		225.5	1.52918	0.866635	1.19791	0.331273		1.65177	8.53946	5.09562	3.44384
			0		94.5033	0.454217	0.52875	0.491484	0.0372663		226.017	1.53579	0.837736	1.18676	0.349028		2.07981	8.39603	5.23792	3.15811
			0		94.7533	0.447562	0.521168	0.484365	0.0368025		226.533	1.60349	0.822765	1.21313	0.390365		2.75963	8.51188	5.63576	2.87613
			0		95.0033	0.441287	0.511455	0.476371	0.0350837		227.033	1.61621	0.928839	1.27253	0.343688		2.53942	8.74257	5.64099	3.10157
			0		95.2533	0.434088	0.504502	0.469295	0.0352075		227.55	1.56413	0.430979	0.997556	0.566577		2.11919	8.50393	5.31156	3.19237
			0		95.5033	0.426195	0.49679	0.461493	0.0352975		228.067	1.51408	0.410043	0.962064	0.552021		1.80503	8.68641	5.24572	3.44069
			0		95.7533	0.417693	0.488967	0.45333	0.0356375		228.583	1.49855	0.112788	0.805668	0.69288		1.46048	8.1191	4.78979	3.32931
			0		96.0033	0.409015	0.482548	0.445781	0.0367663		229.1	1.60808	0.336759	0.972417	0.635658		1.62524	7.97212	4.79868	3.17344
			0		96.2533	0.401855	0.474583	0.438219	0.0363638		229.617	1.60583	0.320377	0.963104	0.642727		1.20331	7.6478	4.42556	3.22225
			0		96.5033	0.395918	0.4681	0.432009	0.0360912		230.133	1.55508	0.483942	1.01951	0.535568		0.855278	7.42212	4.1387	3.28342
			0		96.7533	0.390495	0.459507	0.425001	0.0345062		230.65	1.42991	0.684336	1.05713	0.372789		1.16677	7.63125	4.39901	3.23224
			0		97.0033	0.384043	0.451738	0.41789	0.0338475		231.167	1.36874	0.477931	0.923335	0.445404		0.861036	7.75219	4.30661	3.44558
			0		97.2533	0.377468	0.444598	0.411033	0.033565		231.683	1.33702	0.503418	0.920219	0.416802		0.559472	7.71329	4.13638	3.57691
			0		97.5033	0.371352	0.43598	0.403666	0.0323138		232.183	1.37549	0.352007	0.863751	0.511744		0.456713	7.72287	4.08979	3.63308
			0		97.7533	0.36333	0.429433	0.396381	0.0330513		232.7	1.43701	0.472898	0.954954	0.482056		0.423113	7.89744	4.16028	3.73717
			0		98.0033	0.35716	0.421412	0.389286	0.0321262		233.217	1.44094	0.424668	0.932805	0.508137		0.645148	8.37328	4.50922	3.86407
			0		98.2533	0.351328	0.414883	0.383105	0.0317775		233.733	1.44635	0.444421	0.945387	0.500966		0.964126	8.64011	4.80212	3.83799
			0		98.5033	0.343437	0.408153	0.375795	0.0323575		234.25	1.37874	0.437223	0.907981	0.470758		0.711587	8.71575	4.71367	4.00208
			0		98.7533	0.337732	0.399923	0.368827	0.031095		234.767	1.27861	0.49298	0.885796	0.392816		0.943525	8.34699	4.64526	3.70173
			0		99.0033	0.330167	0.394115	0.362141	0.0319738		235.283	1.27864	0.368755	0.823698	0.454943		1.09871	8.66247	4.88059	3.78188
			0		99.2533	0.32453	0.385655	0.355093	0.0305625		235.8	1.31431	0.13973	0.727017	0.587288		1.33288	8.43644	4.88466	3.55178
			0		99.5033	0.320298	0.378802	0.34955	0.0292525		236.317	1.36841	0.219236	0.793824	0.574588		0.87179	8.32213	4.59696	3.72517
			0		99.7533	0.316233	0.373117	0.344675	0.0284425		236.817	1.22718	0.217116	0.722147	0.50503		0.802332	8.18747	4.4949	3.69257
			0		100.003	0.311953	0.366907	0.33943	0.0274775		237.333	1.21288	0.512076	0.862478	0.350401		1.08769	8.47206	4.77988	3.69218
			0		100.253	0.307125	0.360938	0.334031	0.0269063		237.85	1.10222	0.818336	0.96028	0.141944		0.984183	8.48819	4.73619	3.752
			0		100.503	0.303267	0.35317	0.328219	0.0249513		238.367	1.08366	0.81376	0.948711	0.134951		1.16284	7.81102	4.48693	3.32409
			0		100.753	0.29863	0.3471	0.322865	0.024235		238.883	1.0713	1.00005	1.03568	0.0356281		0.807646	7.89562	4.35163	3.54399
			0		101.003	0.295312	0.3404	0.317856	0.0225438		239.4	1.04889	0.78375	0.91632	0.132571		0.638564	7.84744	4.243	3.60444
			0		101.253	0.292505	0.335647	0.314076	0.0215712		239.917	0.99037	0.80204	0.896205	0.0941646		0.624182	8.59953	4.61186	3.98768
			0		101.503	0.288052	0.332133	0.310092	0.02204
			0		101.753	0.283268	0.32627	0.304769	0.0215012
			0		102.003	0.28077	0.320163	0.300466	0.0196963
			0		102.253	0.275157	0.314442	0.2948	0.0196425
			0		102.503	0.270925	0.308968	0.289946	0.0190213
			0		102.753	0.269427	0.305595	0.287511	0.0180838
			0		103.003	0.26582	0.30213	0.283975	0.018155
			0		103.253	0.264175	0.296855	0.280515	0.01634
			0		103.503	0.263078	0.293272	0.278175	0.0150975
			0		103.753	0.259545	0.289175	0.27436	0.014815
			0		104.003	0.255965	0.286583	0.271274	0.0153088
			0		104.253	0.253585	0.28496	0.269273	0.0156875
			0		104.503	0.250408	0.28214	0.266274	0.0158662
			0		104.753	0.24844	0.279	0.26372	0.01528
			0		105.003	0.248893	0.276057	0.262475	0.0135825
			0		105.253	0.247833	0.272665	0.260249	0.0124162
			0		105.503	0.24663	0.269267	0.257949	0.0113188
			0		105.753	0.245195	0.266945	0.25607	0.010875
			0		106.003	0.242785	0.264267	0.253526	0.0107413
			0		106.253	0.241713	0.263912	0.252812	0.0111
			0		106.503	0.242253	0.2611	0.251676	0.00942375
			0		106.753	0.24149	0.25992	0.250705	0.009215
			0		107.003	0.23962	0.257053	0.248336	0.00871625
			0		107.253	0.239372	0.253125	0.246249	0.00687625
			0		107.503	0.23874	0.252775	0.245758	0.0070175
			0		107.753	0.23871	0.250265	0.244487	0.0057775
			0		108.003	0.240033	0.249303	0.244668	0.004635
			0		108.253	0.238083	0.24818	0.243131	0.00504875
			0		108.503	0.2369	0.248245	0.242572	0.0056725
			0		108.753	0.237275	0.247452	0.242364	0.00508875
			0		109.003	0.236693	0.247055	0.241874	0.00518125
			0		109.253	0.237528	0.245825	0.241676	0.00414875
			0		109.503	0.236583	0.244312	0.240447	0.003865
			0		109.753	0.234613	0.244025	0.239319	0.00470625
			0		110.003	0.234118	0.244515	0.239316	0.00519875
			0		110.253	0.233717	0.245897	0.239808	0.00609
			0		110.503	0.233857	0.244918	0.239388	0.00553
			0		110.753	0.23487	0.245158	0.240014	0.00514375
			0		111.003	0.23493	0.244762	0.239846	0.00491625
			0		111.253	0.235195	0.243565	0.23938	0.004185
			0		111.503	0.235735	0.2436	0.239667	0.0039325
			0		111.753	0.237693	0.24332	0.240506	0.00281375
			0		112.003	0.238177	0.24266	0.240419	0.00224125
			0		112.253	0.240017	0.243262	0.24164	0.0016225
			0		112.503	0.240185	0.245053	0.242619	0.00243375
			0		112.753	0.238492	0.24507	0.241781	0.00328875
			0		113.003	0.240535	0.246098	0.243316	0.00278125
			0		113.253	0.240155	0.24661	0.243383	0.0032275
			0		113.503	0.242008	0.246342	0.244175	0.0021675
			0		113.753	0.245245	0.248455	0.24685	0.001605
			0		114.003	0.24535	0.25101	0.24818	0.00283
			0		114.253	0.2483	0.251958	0.250129	0.00182875
			0		114.503	0.248398	0.254415	0.251406	0.00300875
			0		114.753	0.249625	0.254858	0.252241	0.00261625
			0		115.003	0.251053	0.254648	0.25285	0.0017975
			0		115.253	0.251887	0.25749	0.254689	0.00280125
			0		115.503	0.25777	0.25676	0.257265	0.000505
			0		115.753	0.25823	0.257883	0.258056	0.00017375
			0		116.003	0.26023	0.25936	0.259795	0.000435
			0		116.253	0.259893	0.259697	0.259795	9.75e-05
			0		116.503	0.2598	0.261827	0.260814	0.00101375
			0		116.753	0.260632	0.262392	0.261512	0.00088
			0		117.003	0.26162	0.263648	0.262634	0.00101375
			0		117.253	0.266453	0.264558	0.265505	0.0009475
			0		117.503	0.267888	0.26579	0.266839	0.00104875
			0		117.753	0.270998	0.267157	0.269077	0.00192
			0		118.003	0.274402	0.267888	0.271145	0.0032575
			0		118.253	0.275745	0.27003	0.272887	0.0028575
			0		118.503	0.281168	0.272972	0.27707	0.0040975
			0		118.753	0.28432	0.27617	0.280245	0.004075
			0		119.003	0.287355	0.277907	0.282631	0.00472375
			0		119.253	0.290287	0.280767	0.285527	0.00476
			0		119.503	0.290618	0.28282	0.286719	0.00389875
			0		119.753	0.293508	0.286463	0.289985	0.0035225
			0		120.003	0.29712	0.290235	0.293678	0.0034425
			0		120.253	0.299787	0.291297	0.295542	0.004245
			0		120.503	0.302918	0.294077	0.298497	0.00442
			0		120.753	0.30658	0.294475	0.300527	0.0060525
			0		121.003	0.308305	0.296758	0.302531	0.00577375
			0		121.253	0.3103	0.299648	0.304974	0.00532625
			0		121.503	0.312065	0.302	0.307033	0.0050325
			0		121.753	0.314467	0.304913	0.30969	0.0047775
			0		122.003	0.318772	0.305447	0.31211	0.0066625
			0		122.253	0.321955	0.308195	0.315075	0.00688
			0		122.503	0.325475	0.310418	0.317946	0.00752875
			0		122.753	0.326065	0.312868	0.319466	0.00659875
			0		123.003	0.32768	0.316692	0.322186	0.00549375
			0		123.253	0.329735	0.319285	0.32451	0.005225
			0		123.503	0.331895	0.321773	0.326834	0.00506125
			0		123.753	0.335292	0.324728	0.33001	0.0052825
			0		124.003	0.336213	0.327167	0.33169	0.0045225
			0		124.253	0.338133	0.328842	0.333487	0.004645
			0		124.503	0.341015	0.331095	0.336055	0.00496
			0		124.753	0.34312	0.333877	0.338499	0.00462125
			0		125.003	0.344125	0.337993	0.341059	0.00306625
			0		125.253	0.345388	0.342463	0.343925	0.0014625
			0		125.503	0.344037	0.344645	0.344341	0.00030375
			0		125.753	0.343105	0.34646	0.344782	0.0016775
			0		126.003	0.345105	0.347037	0.346071	0.00096625
			0		126.253	0.34445	0.347715	0.346082	0.0016325
			0		126.503	0.342825	0.34925	0.346037	0.0032125
			0		126.753	0.341683	0.350092	0.345888	0.004205
			0		127.003	0.33794	0.348795	0.343367	0.0054275
			0		127.253	0.33651	0.347075	0.341792	0.0052825
			0		127.503	0.33399	0.345378	0.339684	0.00569375
			0		127.753	0.332833	0.343135	0.337984	0.00515125
			0		128.003	0.330808	0.342867	0.336838	0.00603
			0		128.253	0.32773	0.341067	0.334399	0.00666875
			0		128.503	0.32568	0.338072	0.331876	0.00619625
			0		128.753	0.322232	0.334867	0.32855	0.0063175
			0		129.003	0.31707	0.331207	0.324139	0.00706875
			0		129.253	0.313843	0.326225	0.320034	0.00619125
			0		129.503	0.312218	0.322267	0.317242	0.005025
			0		129.753	0.308555	0.318397	0.313476	0.00492125
			0		130.003	0.308578	0.315655	0.312116	0.00353875
			0		130.253	0.30521	0.313068	0.309139	0.00392875
			0		130.503	0.300218	0.31002	0.305119	0.00490125
			0		130.753	0.296458	0.3066	0.301529	0.00507125
			0		131.003	0.291068	0.301248	0.296158	0.00509
			0		131.253	0.287628	0.295343	0.291485	0.0038575
			0		131.503	0.282052	0.28946	0.285756	0.00370375
			0		131.753	0.277452	0.282918	0.280185	0.0027325
			0		132.003	0.273203	0.278213	0.275707	0.002505
			0		132.253	0.269485	0.274255	0.27187	0.002385
			0		132.503	0.268075	0.269363	0.268719	0.00064375
			0		132.753	0.26551	0.265387	0.265449	6.125e-05
			0		133.003	0.263295	0.260065	0.26168	0.001615
			0		133.253	0.260283	0.256603	0.258443	0.00184
			0		133.503	0.258515	0.254455	0.256485	0.00203
			0		133.753	0.258227	0.252688	0.255458	0.00277
			0		134.003	0.258742	0.251145	0.254944	0.00379875
			0		134.253	0.257805	0.249623	0.253714	0.00409125
			0		134.503	0.258792	0.247008	0.2529	0.0058925
			0		134.753	0.258205	0.24424	0.251223	0.0069825
			0		135.003	0.257408	0.24445	0.250929	0.00647875
			0		135.253	0.260105	0.243527	0.251816	0.00828875
			0		135.503	0.260068	0.244235	0.252151	0.00791625
			0		135.753	0.264323	0.24609	0.255206	0.00911625
			0		136.003	0.26574	0.24692	0.25633	0.00941
			0		136.253	0.269128	0.249133	0.25913	0.0099975
			0		136.503	0.273993	0.251723	0.262858	0.011135
			0		136.753	0.275865	0.254135	0.265	0.010865
			0		137.003	0.282373	0.254625	0.268499	0.0138738
			0		137.253	0.287745	0.257688	0.272716	0.0150288
			0		137.503	0.292627	0.25968	0.276154	0.0164737
			0		137.753	0.299148	0.262147	0.280647	0.0185
			0		138.003	0.3046	0.267973	0.286286	0.0183137
			0		138.253	0.308623	0.272415	0.290519	0.0181038
			0		138.503	0.314902	0.276033	0.295467	0.019435
			0		138.753	0.320887	0.280475	0.300681	0.0202063
			0		139.003	0.326267	0.283288	0.304778	0.02149
			0		139.253	0.333707	0.286515	0.310111	0.0235962
			0		139.503	0.340215	0.292708	0.316461	0.0237538
			0		139.753	0.344835	0.299052	0.321944	0.0228912
			0		140.003	0.351085	0.305405	0.328245	0.02284
			0		140.253	0.353823	0.310185	0.332004	0.0218188
			0		140.503	0.357873	0.315632	0.336753	0.02112
			0		140.753	0.363755	0.319398	0.341576	0.0221787
			0		141.003	0.367912	0.323867	0.34589	0.0220225
			0		141.253	0.372493	0.329443	0.350967	0.021525
			0		141.503	0.37662	0.333352	0.354986	0.0216337
			0		141.755	0.38179	0.340205	0.360998	0.0207925
			0		142.003	0.386508	0.345453	0.36598	0.0205275
			0		142.253	0.393212	0.351045	0.372129	0.0210837
			0		142.505	0.397898	0.3575	0.377699	0.0201988
			0		142.753	0.401303	0.361398	0.38135	0.0199525
			0		143.003	0.40651	0.367287	0.386899	0.0196112
			0		143.255	0.41219	0.373957	0.393074	0.0191162
			0		143.505	0.416865	0.379227	0.398046	0.0188187
			0		143.753	0.419532	0.38493	0.402231	0.0173012
			0		144.003	0.422955	0.38918	0.406068	0.0168875
			0		144.255	0.42417	0.39381	0.40899	0.01518
			0		144.505	0.426035	0.3997	0.412867	0.0131675
			0		144.753	0.431445	0.404447	0.417946	0.0134988
			0		145.005	0.433482	0.4098	0.421641	0.0118412
			0		145.255	0.43731	0.41308	0.425195	0.012115
			0		145.503	0.442015	0.41653	0.429273	0.0127425
			0		145.755	0.441468	0.42153	0.431499	0.00996875
			0		146.005	0.444245	0.426397	0.435321	0.00892375
			0		146.253	0.444723	0.43101	0.437866	0.00685625
			0		146.503	0.446298	0.436567	0.441433	0.004865
			0		146.753	0.45247	0.44069	0.44658	0.00589
			0		147.005	0.456462	0.445217	0.45084	0.0056225
			0		147.255	0.460125	0.448112	0.454119	0.00600625
			0		147.505	0.464197	0.449997	0.457097	0.0071
			0		147.755	0.465442	0.45385	0.459646	0.00579625
			0		148.005	0.465033	0.456975	0.461004	0.00402875
			0		148.253	0.467792	0.462023	0.464908	0.002885
			0		148.505	0.467762	0.467707	0.467735	2.75e-05
			0		148.755	0.469995	0.470357	0.470176	0.00018125
			0		149.005	0.472198	0.473682	0.47294	0.0007425
			0		149.255	0.47321	0.476005	0.474608	0.0013975
			0		149.505	0.475123	0.47807	0.476596	0.00147375
			0		149.753	0.47633	0.480353	0.478341	0.00201125
			0		150.005	0.47874	0.482793	0.480766	0.00202625
			0		150.255	0.482352	0.485582	0.483967	0.001615
			0		150.505	0.482942	0.48848	0.485711	0.00276875
			0		150.755	0.483783	0.493312	0.488548	0.004765
			0		151.005	0.48418	0.4964	0.49029	0.00611
			0		151.253	0.484542	0.49953	0.492036	0.00749375
			0		151.505	0.48529	0.50031	0.4928	0.00751
			0		151.755	0.48631	0.501605	0.493958	0.0076475
			0		152.005	0.4882	0.502038	0.495119	0.00691875
			0		152.253	0.48801	0.504505	0.496257	0.0082475
			0		152.505	0.49017	0.50771	0.49894	0.00877
			0		152.755	0.491053	0.509742	0.500398	0.009345
			0		153.005	0.489777	0.514487	0.502132	0.012355
			0		153.253	0.489145	0.516262	0.502704	0.0135587
			0		153.505	0.49012	0.51798	0.50405	0.01393
			0		153.755	0.491095	0.51837	0.504733	0.0136375
			0		154.005	0.492615	0.51836	0.505487	0.0128725
			0		154.255	0.493493	0.51954	0.506516	0.0130237
			0		154.505	0.492315	0.51941	0.505862	0.0135475
			0		154.755	0.492825	0.521868	0.507346	0.0145213
			0		155.005	0.493563	0.524563	0.509062	0.0155
			0		155.255	0.49371	0.526675	0.510193	0.0164825
			0		155.505	0.49436	0.52859	0.511475	0.017115
			0		155.753	0.494892	0.529443	0.512167	0.017275
			0		156.005	0.49602	0.52838	0.5122	0.01618
			0		156.255	0.498938	0.528165	0.513551	0.0146137
			0		156.505	0.502077	0.52952	0.515799	0.0137213
			0		156.755	0.50274	0.530845	0.516792	0.0140525
			0		157.005	0.503622	0.533362	0.518493	0.01487
			0		157.253	0.50263	0.53415	0.51839	0.01576
			0		157.505	0.500575	0.534693	0.517634	0.0170588
			0		157.755	0.500648	0.53488	0.517764	0.0171162
			0		158.005	0.501545	0.534225	0.517885	0.01634
			0		158.255	0.50087	0.535322	0.518096	0.0172262
			0		158.505	0.50373	0.535497	0.519614	0.0158837
			0		158.755	0.503337	0.536225	0.519781	0.0164437
			0		159.005	0.502748	0.537807	0.520277	0.01753
			0		159.255	0.503472	0.538432	0.520952	0.01748
			0		159.505	0.501085	0.539312	0.520199	0.0191137
			0		159.755	0.502375	0.539787	0.521081	0.0187063
			0		160.005	0.502067	0.539303	0.520685	0.0186175
			0		160.255	0.504385	0.539705	0.522045	0.01766
			0		160.505	0.50652	0.541515	0.524018	0.0174975
			0		160.755	0.507188	0.543125	0.525156	0.0179687
			0		161.005	0.50755	0.544782	0.526166	0.0186163
			0		161.255	0.506103	0.545353	0.525728	0.019625
			0		161.505	0.506132	0.54484	0.525486	0.0193538
			0		161.755	0.504452	0.544975	0.524714	0.0202613
			0		162.005	0.505997	0.545233	0.525615	0.0196175
			0		162.255	0.506267	0.545988	0.526128	0.01986
			0		162.505	0.507132	0.546395	0.526764	0.0196312
			0		162.755	0.510082	0.546825	0.528454	0.0183713
			0		163.005	0.510868	0.547052	0.52896	0.0180925
			0		163.253	0.511382	0.54621	0.528796	0.0174138
			0		163.505	0.511268	0.546222	0.528745	0.0174775
			0		163.755	0.509623	0.546632	0.528128	0.018505
			0		164.005	0.511175	0.547467	0.529321	0.0181462
			0		164.255	0.510575	0.54901	0.529792	0.0192175
			0		164.505	0.510285	0.550855	0.53057	0.020285
			0		164.755	0.510618	0.54953	0.530074	0.0194562
			0		165.005	0.508132	0.549127	0.52863	0.0204975
			0		165.255	0.50788	0.548778	0.528329	0.0204488
			0		165.505	0.507138	0.548293	0.527715	0.0205775
			0		165.755	0.507952	0.549215	0.528584	0.0206313
			0		166.005	0.508045	0.549823	0.528934	0.0208888
			0		166.255	0.510327	0.547825	0.529076	0.0187488
			0		166.505	0.510402	0.54745	0.528926	0.0185238
			0		166.755	0.511575	0.546743	0.529159	0.0175838
			0		167.005	0.512055	0.545772	0.528914	0.0168588
			0		167.255	0.511515	0.54683	0.529173	0.0176575
			0		167.505	0.513085	0.547595	0.53034	0.017255
			0		167.753	0.51246	0.547852	0.530156	0.0176962
			0		168.005	0.512208	0.548382	0.530295	0.0180875
			0		168.253	0.512772	0.547665	0.530219	0.0174462
			0		168.505	0.514177	0.547573	0.530875	0.0166975
			0		168.755	0.51352	0.547952	0.530736	0.0172162
			0		169.005	0.51344	0.54796	0.5307	0.01726
			0		169.255	0.51255	0.55075	0.53165	0.0191
			0		169.505	0.511335	0.550785	0.53106	0.019725
			0		169.755	0.510815	0.55319	0.532002	0.0211875
			0		170.005	0.512288	0.55347	0.532879	0.0205913
			0		170.253	0.513287	0.554327	0.533807	0.02052
			0		170.505	0.51357	0.554882	0.534226	0.0206563
			0		170.755	0.511967	0.55289	0.532429	0.0204613
			0		171.005	0.511618	0.55293	0.532274	0.0206562
			0		171.255	0.512377	0.550495	0.531436	0.0190588
			0		171.505	0.51066	0.550593	0.530626	0.0199663
			0		171.755	0.51299	0.550133	0.531561	0.0185712
			0		172.005	0.512585	0.549818	0.531201	0.0186163
			0		172.255	0.511825	0.551168	0.531496	0.0196713
			0		172.505	0.513602	0.54971	0.531656	0.0180538
			0		172.755	0.514395	0.54999	0.532192	0.0177975
			0		173.005	0.514415	0.550865	0.53264	0.018225
			0		173.255	0.514138	0.549965	0.532051	0.0179138
			0		173.505	0.513213	0.550643	0.531928	0.018715
			0		173.755	0.513243	0.551028	0.532135	0.0188925
			0		174.005	0.513493	0.550357	0.531925	0.0184325
			0		174.255	0.514517	0.550323	0.53242	0.0179025
			0		174.505	0.514425	0.5509	0.532663	0.0182375
			0		174.755	0.513378	0.551327	0.532353	0.018975
			0		175.005	0.513567	0.550952	0.53226	0.0186925
			0		175.255	0.515683	0.55136	0.533521	0.0178388
			0		175.505	0.515535	0.549625	0.53258	0.017045
			0		175.755	0.51565	0.549385	0.532517	0.0168675
			0		176.005	0.516737	0.549385	0.533061	0.0163238
			0		176.255	0.513935	0.547548	0.530741	0.0168063
			0		176.505	0.51374	0.54917	0.531455	0.017715
			0		176.755	0.5143	0.549357	0.531829	0.0175287
			0		177.005	0.513748	0.548552	0.53115	0.0174025
			0		177.255	0.515018	0.549708	0.532363	0.017345
			0		177.505	0.516115	0.54944	0.532778	0.0166625
			0		177.755	0.51712	0.548562	0.532841	0.0157212
			0		178.005	0.518787	0.5482	0.533494	0.0147063
			0		178.255	0.518113	0.548615	0.533364	0.0152512
			0		178.505	0.517868	0.548965	0.533416	0.0155487
			0		178.755	0.517382	0.548907	0.533145	0.0157625
			0		179.005	0.514505	0.55052	0.532512	0.0180075
			0		179.255	0.513162	0.55163	0.532396	0.0192338
			0		179.505	0.5135	0.54995	0.531725	0.018225
			0		179.755	0.51385	0.550462	0.532156	0.0183062
			0		180.005	0.514757	0.552482	0.53362	0.0188625
			0		180.255	0.515322	0.551343	0.533332	0.01801
			0		180.505	0.515543	0.551685	0.533614	0.0180712
			0		180.755	0.514733	0.551623	0.533178	0.018445
			0		181.005	0.513905	0.549975	0.53194	0.018035
			0		181.255	0.514285	0.550617	0.532451	0.0181662
			0		181.505	0.513302	0.551885	0.532594	0.0192912
			0		181.755	0.512892	0.552318	0.532605	0.0197125
			0		182.005	0.515567	0.551805	0.533686	0.0181188
			0		182.255	0.51491	0.55103	0.53297	0.01806
			0		182.505	0.515292	0.54974	0.532516	0.0172238
			0		182.755	0.514925	0.550498	0.532711	0.0177863
			0		183.005	0.512968	0.550982	0.531975	0.0190075
			0		183.255	0.512988	0.552395	0.532691	0.0197037
			0		183.505	0.5143	0.553527	0.533914	0.0196137
			0		183.755	0.515275	0.553388	0.534331	0.0190563
			0		184.005	0.514153	0.55317	0.533661	0.0195087
			0		184.255	0.514495	0.552925	0.53371	0.019215
			0		184.505	0.513408	0.552015	0.532711	0.0193037
			0		184.755	0.513192	0.550527	0.53186	0.0186675
			0		185.005	0.51358	0.550907	0.532244	0.0186637
			0		185.255	0.512922	0.550153	0.531537	0.018615
			0		185.505	0.51328	0.55039	0.531835	0.018555
			0		185.755	0.513432	0.55112	0.532276	0.0188437
			0		186.005	0.514175	0.55087	0.532523	0.0183475
			0		186.255	0.514905	0.55191	0.533408	0.0185025
			0		186.505	0.513567	0.552412	0.53299	0.0194225
			0		186.755	0.514255	0.55342	0.533837	0.0195825
			0		187.005	0.512292	0.552175	0.532234	0.0199413
			0		187.255	0.512047	0.5498	0.530924	0.0188762
			0		187.505	0.512968	0.547902	0.530435	0.0174675
			0		187.755	0.51203	0.546625	0.529327	0.0172975
			0		188.005	0.514807	0.54637	0.530589	0.0157813
			0		188.255	0.514343	0.54738	0.530861	0.0165188
			0		188.505	0.515863	0.54807	0.531966	0.0161038
			0		188.755	0.515775	0.546418	0.531096	0.0153213
			0		189.005	0.515458	0.547297	0.531378	0.01592
			0		189.255	0.51674	0.545675	0.531208	0.0144675
			0		189.505	0.51473	0.542482	0.528606	0.0138762
			0		189.755	0.516692	0.540482	0.528587	0.011895
			0		190.005	0.516365	0.536425	0.526395	0.01003
			0		190.255	0.515378	0.531842	0.52361	0.0082325
			0		190.505	0.515695	0.529315	0.522505	0.00681
			0		190.755	0.51477	0.524983	0.519876	0.00510625
			0		191.005	0.516065	0.52043	0.518247	0.0021825
			0		191.255	0.517493	0.51747	0.517481	1.125e-05
			0		191.505	0.517585	0.51227	0.514927	0.0026575
			0		191.755	0.517487	0.506977	0.512232	0.005255
			0		192.005	0.517892	0.50144	0.509666	0.00822625
			0		192.255	0.516875	0.49499	0.505933	0.0109425
			0		192.505	0.518678	0.487745	0.503211	0.0154663
			0		192.755	0.51821	0.479683	0.498946	0.0192637
			0		193.005	0.515923	0.471422	0.493673	0.02225
			0		193.255	0.516855	0.462492	0.489674	0.0271813
			0		193.505	0.513543	0.454472	0.484007	0.029535
			0		193.755	0.512458	0.445835	0.479146	0.0333113
			0		194.005	0.51174	0.437325	0.474533	0.0372075
			0		194.255	0.50852	0.428085	0.468302	0.0402175
			0		194.505	0.50573	0.419342	0.462536	0.0431938
			0		194.755	0.502117	0.412232	0.457175	0.0449425
			0		195.005	0.495437	0.40318	0.449309	0.0461288
			0		195.255	0.490332	0.395003	0.442667	0.047665
			0		195.505	0.486217	0.387327	0.436773	0.049445
			0		195.755	0.481302	0.376827	0.429065	0.0522375
			0		196.005	0.476917	0.368695	0.422806	0.0541112
			0		196.255	0.469313	0.36004	0.414676	0.0546363
			0		196.505	0.461042	0.349808	0.405425	0.0556175
			0		196.755	0.451095	0.341455	0.396275	0.05482
			0		197.005	0.440625	0.332958	0.386791	0.0538337
			0		197.255	0.43167	0.323985	0.377827	0.0538425
			0		197.505	0.421123	0.315825	0.368474	0.0526487
			0		197.755	0.409905	0.307648	0.358776	0.0511287
			0		198.005	0.4012	0.299535	0.350368	0.0508325
			0		198.255	0.389748	0.292258	0.341002	0.048745
			0		198.505	0.379122	0.283695	0.331409	0.0477137
			0		198.755	0.370472	0.276772	0.323622	0.04685
			0		199.005	0.357825	0.268482	0.313154	0.0446712
			0		199.255	0.347363	0.260533	0.303948	0.043415
			0		199.505	0.336917	0.253982	0.29545	0.0414675
			0		199.755	0.325355	0.247175	0.286265	0.03909
			0		200.005	0.314818	0.240978	0.277898	0.03692
			0		200.255	0.303212	0.234265	0.268739	0.0344737
			0		200.505	0.291828	0.22799	0.259909	0.0319188
			0		200.755	0.280162	0.219785	0.249974	0.0301887
			0		201.005	0.269313	0.212548	0.24093	0.0283825
			0		201.255	0.260375	0.206575	0.233475	0.0269
			0		201.505	0.249745	0.200313	0.225029	0.0247163
			0		201.755	0.238035	0.195958	0.216996	0.0210387
			0		202.005	0.228227	0.19107	0.209649	0.0185787
			0		202.255	0.218622	0.185245	0.201934	0.0166888
			0		202.505	0.209105	0.180273	0.194689	0.0144163
			0		202.755	0.202598	0.17398	0.188289	0.0143088
			0		203.005	0.193103	0.168858	0.18098	0.0121225
			0		203.255	0.181583	0.164392	0.172988	0.008595
			0		203.505	0.172607	0.16089	0.166749	0.00585875
			0		203.755	0.163365	0.15695	0.160158	0.0032075
			0		204.005	0.156027	0.152402	0.154215	0.0018125
			0		204.255	0.149877	0.146992	0.148435	0.0014425
			0		204.505	0.142682	0.14059	0.141636	0.00104625
			0		204.755	0.13661	0.136015	0.136313	0.0002975
			0		205.005	0.130128	0.130708	0.130418	0.00029
			0		205.255	0.124317	0.12818	0.126249	0.00193125
			0		205.505	0.118675	0.123505	0.12109	0.002415
			0		205.755	0.111437	0.119652	0.115545	0.0041075
			0		206.005	0.104015	0.11712	0.110567	0.0065525
			0		206.255	0.097985	0.11245	0.105217	0.0072325
			0		206.505	0.093955	0.1097	0.101828	0.0078725
			0		206.755	0.089955	0.10681	0.0983825	0.0084275
			0		207.005	0.08754	0.102703	0.0951213	0.00758125
			0		207.255	0.083105	0.1001	0.0916025	0.0084975
			0		207.505	0.078855	0.096795	0.087825	0.00897
			0		207.755	0.0750025	0.093965	0.0844837	0.00948125
			0		208.005	0.0714325	0.0911625	0.0812975	0.009865
			0		208.255	0.067955	0.087665	0.07781	0.009855
			0		208.505	0.0632375	0.085045	0.0741412	0.0109038
			0		208.755	0.05862	0.08145	0.070035	0.011415
			0		209.005	0.0543625	0.0773525	0.0658575	0.011495
			0		209.255	0.0505975	0.07485	0.0627237	0.0121263
			0		209.505	0.04882	0.0721825	0.0605012	0.0116813
			0		209.755	0.0448375	0.0702025	0.05752	0.0126825
			0		210.005	0.0444525	0.0689175	0.056685	0.0122325
			0		210.255	0.0419425	0.067015	0.0544787	0.0125363
			0		210.505	0.0372975	0.064395	0.0508462	0.0135488
			0		210.755	0.0370525	0.0615525	0.0493025	0.01225
			0		211.005	0.03185	0.0596325	0.0457412	0.0138912
			0		211.255	0.03203	0.05565	0.04384	0.01181
			0		211.505	0.0321275	0.0527475	0.0424375	0.01031
			0		211.755	0.031355	0.0497175	0.0405362	0.00918125
			0		212.005	0.032305	0.04698	0.0396425	0.0073375
			0		212.255	0.0286475	0.045165	0.0369063	0.00825875
			0		212.505	0.0249625	0.04376	0.0343612	0.00939875
			0		212.755	0.023655	0.0425225	0.0330888	0.00943375
			0		213.005	0.023385	0.0402875	0.0318363	0.00845125
			0		213.255	0.0213675	0.0390325	0.0302	0.0088325
			0		213.505	0.0213925	0.0372	0.0292962	0.00790375
			0		213.755	0.0196825	0.0353225	0.0275025	0.00782
			0		214.005	0.0186775	0.0342075	0.0264425	0.007765
			0		214.255	0.0197575	0.032485	0.0261212	0.00636375
			0		214.505	0.01923	0.0317725	0.0255013	0.00627125
			0		214.755	0.018585	0.0305575	0.0245712	0.00598625
			0		215.005	0.017265	0.0282625	0.0227638	0.00549875
			0		215.255	0.0175225	0.0266575	0.02209	0.0045675
			0		215.505	0.01656	0.02413	0.020345	0.003785
			0		215.755	0.01442	0.0225725	0.0184963	0.00407625
			0		216.005	0.0137225	0.0214825	0.0176025	0.00388
			0		216.255	0.01322	0.021605	0.0174125	0.0041925
			0		216.505	0.013495	0.0204675	0.0169813	0.00348625
			0		216.755	0.0139375	0.01931	0.0166237	0.00268625
			0		217.005	0.0125875	0.0189075	0.0157475	0.00316
			0		217.255	0.01076	0.0176875	0.0142237	0.00346375
			0		217.505	0.0104525	0.0173175	0.013885	0.0034325
			0		217.755	0.0112675	0.016845	0.0140562	0.00278875
			0		218.005	0.011175	0.0166225	0.0138987	0.00272375
			0		218.255	0.01121	0.01542	0.013315	0.002105
			0		218.505	0.0121975	0.01395	0.0130738	0.00087625
			0		218.755	0.01091	0.0134125	0.0121612	0.00125125
			0		219.005	0.0108675	0.0117725	0.01132	0.0004525
			0		219.255	0.0115075	0.0100275	0.0107675	0.00074
			0		219.505	0.0103375	0.01056	0.0104487	0.00011125
			0		219.755	0.01187	0.00954	0.010705	0.001165
			0		220.005	0.01163	0.0101475	0.0108887	0.00074125
			0		220.255	0.008745	0.0106975	0.00972125	0.00097625
			0		220.505	0.008125	0.0116425	0.00988375	0.00175875
			0		220.755	0.00496	0.010235	0.0075975	0.0026375
			0		221.005	0.005555	0.010105	0.00783	0.002275
			0		221.255	0.0084575	0.00934	0.00889875	0.00044125
			0		221.505	0.00771	0.007605	0.0076575	5.25e-05
			0		221.755	0.008245	0.0090875	0.00866625	0.00042125
			0		222.005	0.00616	0.0078275	0.00699375	0.00083375
			0		222.255	0.00732	0.0079275	0.00762375	0.00030375
			0		222.505	0.00659	0.0085	0.007545	0.000955
			0		222.755	0.008755	0.0070925	0.00792375	0.00083125
			0		223.005	0.01051	0.0083075	0.00940875	0.00110125
			0		223.255	0.00824	0.0085275	0.00838375	0.00014375
			0		223.505	0.0092575	0.00722	0.00823875	0.00101875
			0		223.755	0.0076125	0.008015	0.00781375	0.00020125
			0		224.005	0.0060425	0.0075825	0.0068125	0.00077
			0		224.255	0.0072575	0.0075775	0.0074175	0.00016
			0		224.505	0.008545	0.008045	0.008295	0.00025
			0		224.755	0.007385	0.0081625	0.00777375	0.00038875
			0		225.005	0.007255	0.0068325	0.00704375	0.00021125
			0		225.255	0.0065425	0.0071775	0.00686	0.0003175
			0		225.505	0.0031875	0.00772	0.00545375	0.00226625
			0		225.755	0.00474	0.007795	0.0062675	0.0015275
			0		226.005	0.00539	0.007975	0.0066825	0.0012925
			0		226.255	0.0044825	0.006265	0.00537375	0.00089125
			0		226.505	0.0049925	0.00536	0.00517625	0.00018375
			0		226.755	0.004975	0.006195	0.005585	0.00061
			0		227.005	0.005375	0.0061425	0.00575875	0.00038375
			0		227.255	0.00389	0.0072225	0.00555625	0.00166625
			0		227.505	0.00384	0.007835	0.0058375	0.0019975
			0		227.755	0.0036	0.0070525	0.00532625	0.00172625
			0		228.005	0.0014475	0.00648	0.00396375	0.00251625
			0		228.255	0.001215	0.006035	0.003625	0.00241
			0		228.505	0.002055	0.005855	0.003955	0.0019
			0		228.755	0.002215	0.0051075	0.00366125	0.00144625
			0		229.005	0.00276	0.00519	0.003975	0.001215
			0		229.255	0.0036175	0.0055475	0.0045825	0.000965
			0		229.505	0.00344	0.0056825	0.00456125	0.00112125
			0		229.755	0.0041075	0.0057875	0.0049475	0.00084
			0		230.005	0.0049425	0.00556	0.00525125	0.00030875
			0		230.255	0.0042075	0.0048225	0.004515	0.0003075
			0		230.505	0.0056425	0.00435	0.00499625	0.00064625
			0		230.755	0.003705	0.004005	0.003855	0.00015
			0		231.005	0.004085	0.004565	0.004325	0.00024
			0		231.255	0.00573	0.00313	0.00443	0.0013
			0		231.505	0.005295	0.0025625	0.00392875	0.00136625
			0		231.755	0.00592	0.0026575	0.00428875	0.00163125
			0		232.005	0.0056675	0.0029725	0.00432	0.0013475
			0		232.255	0.0042675	0.003855	0.00406125	0.00020625
			0		232.505	0.0039475	0.00336	0.00365375	0.00029375
			0		232.755	0.00436	0.00224	0.0033	0.00106
			0		233.005	0.0044525	0.0019075	0.00318	0.0012725
			0		233.255	0.0055075	0.0024425	0.003975	0.0015325
			0		233.505	0.0051025	0.0038725	0.0044875	0.000615
			0		233.755	0.0051325	0.0046125	0.0048725	0.00026
			0		234.005	0.00363	0.00551	0.00457	0.00094
			0		234.255	0.0048025	0.0045175	0.00466	0.0001425
			0		234.505	0.0072375	0.00405	0.00564375	0.00159375
			0		234.755	0.0059375	0.002685	0.00431125	0.00162625
			0		235.005	0.0052875	0.00247	0.00387875	0.00140875
			0		235.255	0.00187	0.003505	0.0026875	0.0008175
			0		235.505	-0.00089	0.0030425	0.00107625	0.00196625
			0		235.755	0.0011825	0.0041975	0.00269	0.0015075
			0		236.005	0.00177	0.00278	0.002275	0.000505
			0		236.255	0.0038325	0.0031	0.00346625	0.00036625
			0		236.505	0.00409	0.0039875	0.00403875	5.125e-05
			0		236.755	0.00219	0.004455	0.0033225	0.0011325
			0		237.005	0.00105	0.004605	0.0028275	0.0017775
			0		237.255	0.0006575	0.00467	0.00266375	0.00200625
			0		237.505	0.00069	0.003515	0.0021025	0.0014125
			0		237.755	0.0004625	0.00313	0.00179625	0.00133375
			0		238.005	0.0014325	0.0022375	0.001835	0.0004025
			0		238.255	-0.000145	0.002355	0.001105	0.00125
			0		238.505	-2.25e-05	0.003115	0.00154625	0.00156875
			0		238.755	0.000535	0.00287	0.0017025	0.0011675
			0		239.005	0.00219	0.0041375	0.00316375	0.00097375
			0		239.255	0.00319	0.00315	0.00317	2e-05
			0		239.505	0.0042025	0.0018	0.00300125	0.00120125
			0		239.755	0.0025775	0.002325	0.00245125	0.00012625
			0		240.005	-0.00093	0.0009825	2.625e-05	0.00095625
			0
			0
			0
			0
			0
			0
			0
			0
			0
			0
			0
			0
			0
			0
			0
			0
			0
			0
			0
			0
			0
			0
			0
			0
			0
			0
			0
			0
			0
			0
			0
			0
			0
			0
			0
			0
			0
			0
			0
			0
			0
			0
			0
			0
			0
			0
			0
			0
			0
			0
			0
			0
			0
			0
			0
			0
			0
			0
			0
			0
			0
			0
			0
			0
			0
			0
			0
			0
			0
			0
			0
			0
			0
			0
			0
			0
			0
			0
			0
			0
			0
			0
			0
			0
			0
			0
			0
			0
			0
			0
			0
			0
			0
			0
			0
			0
			0
			0
			0
			0
			0
			0
			0
			0
			0
			0
			0
			0
			0
			0
			0
			0
			0
			0
			0
			0
			0
			0
			0
			0
			0
			0
			0
			0
			0
			0
			0
			0
			0
			0
			0
			0
			0
			0
			0
			0
			0
			0
			0
			0
			0
			0
			0
			0
			0
			0
			0
			0
			0
			0
			0
			0
			0
			0
			0
			0
			0
			0
			0
			0
			0
			0
			0
			0
			0
			0
			0
			0
			0
			0
			0
			0
			0
			0
			0
			0
			0
			0
			0
			0
			0
			0
			0
			0
			0
			0
			0
			0
			0
			0
			0
			0
			0
			0
			0
			0
			0
			0
			0
			0
			0
			0
			0
			0
			0
			0
			0
			0
			0
			0
			0
			0
			0
			0
			0
			0
			0
			0
			0
			0
			0
			0
			0
			0
			0
			0
			0
			0
			0
			0
			0
			0
			0
			0
			0
			0
			0
			0
			0
			0
			0
			0
			0
			0
			0
			0
			0
			0
			0
			0
			0
			0
			0
			0
			0
			0
			0
			0
			0
			0
			0
			0
			0
			0
			0
			0
			0
			0
			0
			0
			0
			0
			0
			0
			0
			0
			0
			0
			0
			0
			0
			0
			0
			0
			0
			0
			0
			0
			0
			0
			0
			0
			0
			0
			0
			0
			0
			0
			0
			0
			0
			0
			0
			0
			0
			0
			0
			0
			0
			0
			0
			0
			0
			0
			0
			0
			0
			0
			0
			0
			0
			0
			0
			0
			0
			0
			0
			0
			0
			0
			0
			0
			0
			0
			0
			0
			0
			0
			0
			0
			0
			0
			0
			0
			0
			0
			0
			0
			0
			0
			0
			0
			0
			0
			0
			0
			0
			0
			0
			0
			0
			0
			0
			0
			0
			0
			0
			0
			0
			0
			0
			0
			0
			0
			0
			0
			0
			0
			0
			0
			0
			0
			0
			0
			0
			0
			0
			0
			0
			0
			0
			0
			0
			0
			0
			0
			0
			0
			0
			0
			0
			0
			0
			0
			0
			0
			0
			0
			0
			0
			0
			0
			0
			0
			0
			0
			0
			0
			0
			0
			0
			0
			0
			0
			0
			0
			0
			0
			0
			0
			0
			0
			0
			0
			0
			0
			0
			0
			0
			0
			0
			0
			0
			0
			0
			0
			0
			0
			0
			0
			0
			0
			0
			0
			0
			0
			0
			0
			0
			0
			0
			0
			0
			0
			0
			0
			0
			0
			0
			0
			0
			0
			0
			0
			0
			0
			0
			0
			0
			0
			0
			0
			0
			0
			0
			0
			0
			0
			0
			0
			0
			0
			0
			0
			0
			0
			0
			0
			0
			0
			0
			0
			0
			0
			0
			0
			0
			0
			0
			0
			0
			0
			0
			0
			0
			0
			0
			0
			0
			0
			0
			0
			0
			0
			0
			0
			0
			0
			0
			0
			0
			0
			0
			0
			0
			0
			0
			0
			0
			0
			0
			0
			0
			0
			0
			0
			0
			0
			0
			0
			0
			0
			0
			0
			0
			0
			0
			0
			0
			0
			0
			0
			0
			0
			0
			0
			0
			0
			0
			0
			0
			0
			0
			0
			0
			0
			0
			0
			0
			0
			0
			0
			0
			0
			0
			0
			0
			0
			0
			0
			0
			0
			0
			0
			0
			0
			0
			0
			0
			0
			0
			0
			0
			0
			0
			0
			0
			0
			0
			0
			0
			0
			0
			0
			0
			0
			0
			0
			0
			0
			0
			0
			0
			0
			0
			0
			0
			0
			0
			0
			0
			0
			0
			0
			0
			0
			0
			0
			0
			0
			0
			0
			0
			0
			0
			0
			0
			0
			0
			0
			0
			0
			0
			0
			0
			0
			0
			0
			0
			0
			0
			0
			0
			0
			0
			0
			0
			0
			0
			0
			0
			0
			0
			0
			0
			0
			0
			0
			0
			0
			0
			0
			0
			0
			0
			0
			0
			0
			0
			0
			0
			0
			0
			0
			0
			0
			0
			0
			0
			0
			0
			0
			0
			0
			0
			0
			0
			0
			0
			0
			0
			0
			0
			0
			0
			0
			0
			0
			0
			0
			0
			0
			0
			0
			0
			0
			0
			0
			0
			0
			0
			0
			0
			0
			0
			0
			0
			0
			0
			0
			0
			0
			0
			0
			0
			0
			0
			0
			0
			0
			0
			0
			0
			0
			0
			0
			0
			0
			0
			0
			0
			0
			0
			0
			0
			0
			0
			0
			0
			0
			0
			0
			0
			0
			0
			0
			0
			0
			0
			0
			0
			0
			0
			0
			0
			0
			0
			0
			0
			0
			0
			0
			0
			0
			0
			0
			0
			0
			0
			0
			0
			0
			0
			0
			0
			0
			0
			0
			0
			0
			0
			0
			0
			0
			0
			0
			0
			0
			0
			0
			0
			0
			0
			0
			0
			0
			0
			0
			0
			0
			0
			0
			0
			0
			0
			0
			0
			0
			0
			0
			0
			0
			0
			0
			0
			0
			0
			0
			0
			0
			0
			0
			0
			0
			0
			0
			0
			0
			0
			0
			0
			0
			0
			0
			0
			0
			0
			0
			0
			0
			0
			0
			0
			0
			0
			0
			0
			0
			0
			0
			0
			0
			0
			0
			0
			0
			0
			0
			0
			0
			0
			0
			0
			0
			0
			0
			0
			0
			0
			0
			0
			0
			0
			0
			0
			0
			0
			0
			0
			0
			0
			0
			0
			0
			0
			0
			0
			0
[truncated: 174 more rows]
