# Supplementary material for: Fluidics system for resolving concentration-dependent effects of dissolved gases on tissue metabolism
Source: eLife. 2021 Nov 4;10:e66716. doi: 10.7554/eLife.66716 (PMC8660022; doi:10.7554/eLife.66716)
Supplement: Figure 3—source data 1. [file elife-66716-fig3-data1.xlsx]

## Sheet: Fig 3A
Oxygen Consumption Rate							Lactate and Pyruvate Production Rate
Time (min)	O2 nmol/min/million cells	O2 nmol/min/million cells	Ave	SE			Time, Min	LPR Ch1	LPR Ch2	Average LPR	SE	PPR Ch1	PPR Ch2	Average PPR	SE
-86	1.30639	1.27306	1.28973	0.016665			30	0.014	0.009	0.0115	0.0025	0.0001	0.0021	0.0011	0.001
-85.75	1.30291	1.27239	1.28765	0.01526			35	0.016	0.01	0.013	0.003	0	0.0014	0.0007	0.0007
-85.5	1.31353	1.27009	1.29181	0.02172			40	0.019	0.009	0.014	0.005	0.0007	0	0.00035	0.00035
-85.25	1.31089	1.28401	1.29745	0.01344			45	0.018	0.014	0.016	0.002	0.0012	0.001	0.0011	0.0001
-85	1.30808	1.27711	1.29259	0.015485			50	0.027	0.056	0.0415	0.0145	0.0046	0.008	0.0063	0.0017
-84.75	1.31274	1.26361	1.28817	0.024565			55	0.081	0.114	0.0975	0.0165	0.0198	0.0482	0.034	0.0142
-84.5	1.31713	1.27657	1.29685	0.02028			60	0.137	0.184	0.1605	0.0235	0.0486	0.0851	0.06685	0.01825
-84.25	1.3078	1.27336	1.29058	0.01722			65	0.204	0.21	0.207	0.003	0.0876	0.1082	0.0979	0.0103
-84	1.30043	1.27705	1.28874	0.01169			70	0.208	0.207	0.2075	0.0005		0.1171	0.1171
-83.75	1.2947	1.27348	1.28409	0.01061			75	0.204	0.203	0.2035	0.0005	0.1095	0.1179	0.1137	0.0042
-83.5	1.30965	1.27548	1.29256	0.017085			80	0.183	0.212	0.1975	0.0145	0.109	0.1227	0.11585	0.00685
-83.25	1.30813	1.28286	1.29549	0.012635			85	0.23	0.207	0.2185	0.0115	0.106	0.1126	0.1093	0.0033
-83	1.31179	1.25429	1.28304	0.02875			90	0.224	0.211	0.2175	0.0065	0.1066	0.1196	0.1131	0.0065
-82.75	1.29852	1.26749	1.283	0.015515			95	0.197	0.166	0.1815	0.0155	0.1059	0.1205	0.1132	0.0073
-82.5	1.31044	1.2578	1.28412	0.02632			100	0.142	0.098	0.12	0.022	0.1094	0.1185	0.11395	0.00455
-82.25	1.30881	1.26531	1.28706	0.02175			105	0.06	0.049	0.0545	0.0055	0.1104	0.1166	0.1135	0.0031
-82	1.3101	1.28123	1.29567	0.014435			110	0.012	0.012	0.012	0	0.1026	0.1163	0.10945	0.00685
-81.75	1.29981	1.27445	1.28713	0.01268			115	0.007	0	0.0035	0.0035	0.1082	0.1136	0.1109	0.0027
-81.5	1.30583	1.26627	1.28605	0.01978			120	0.004	0	0.002	0.002	0.1093	0.1159	0.1126	0.0033
-81.25	1.2997	1.27094	1.28532	0.01438			125	0.006	0.005	0.0055	0.0005	0.1011	0.1187	0.1099	0.0088
-81	1.30853	1.28056	1.29454	0.013985			130	0.006	0.003	0.0045	0.0015	0.0995		0.0995
-80.75	1.29835	1.26258	1.28046	0.017885			135	0	0.005	0.0025	0.0025	0.1103	0.1142	0.11225	0.00195
-80.5	1.31055	1.25598	1.28327	0.027285
-80.25	1.30482	1.25719	1.281	0.023815
-80	1.29543	1.2805	1.28797	0.007465
-79.75	1.29166	1.24829	1.26998	0.021685
-79.5	1.29835	1.27693	1.28764	0.01071
-79.25	1.30425	1.25901	1.28163	0.02262
-79	1.30459	1.25629	1.28044	0.02415
-78.75	1.30898	1.24406	1.27652	0.03246
-78.5	1.30442	1.26379	1.2841	0.020315
-78.25	1.29914	1.26319	1.28117	0.017975
-78	1.29768	1.25029	1.27398	0.023695
-77.75	1.30487	1.26924	1.28706	0.017815
-77.5	1.29335	1.26319	1.27827	0.01508
-77.25	1.30229	1.27312	1.2877	0.014585
-77	1.30931	1.28008	1.29469	0.014615
-76.75	1.29059	1.26821	1.2794	0.01119
-76.5	1.29824	1.26494	1.28159	0.01665
-76.25	1.3033	1.26718	1.28524	0.01806
-76	1.30262	1.2515	1.27706	0.02556
-75.75	1.29655	1.28232	1.28944	0.007115
-75.5	1.30088	1.26918	1.28503	0.01585
-75.25	1.30409	1.28183	1.29296	0.01113
-75	1.3047	1.26288	1.28379	0.02091
-74.75	1.30988	1.26755	1.28871	0.021165
-74.5	1.30139	1.27215	1.28677	0.01462
-74.25	1.30015	1.26773	1.28394	0.01621
-74	1.29897	1.26694	1.28295	0.016015
-73.75	1.2947	1.27057	1.28263	0.012065
-73.5	1.30184	1.26561	1.28373	0.018115
-73.25	1.29368	1.26077	1.27723	0.016455
-73	1.29464	1.2733	1.28397	0.01067
-72.75	1.297	1.27862	1.28781	0.00919
-72.5	1.29914	1.27148	1.28531	0.01383
-72.25	1.28671	1.2538	1.27026	0.016455
-72	1.29492	1.26282	1.27887	0.01605
-71.75	1.29818	1.25574	1.27696	0.02122
-71.5	1.29031	1.27082	1.28057	0.009745
-71.25	1.29217	1.24503	1.2686	0.02357
-71	1.29745	1.25895	1.2782	0.01925
-70.75	1.30009	1.26658	1.28334	0.016755
-70.5	1.29211	1.26567	1.27889	0.01322
-70.25	1.29666	1.25368	1.27517	0.02149
-70	1.29256	1.26688	1.27972	0.01284
-69.75	1.29571	1.2529	1.27431	0.021405
-69.5	1.29711	1.26228	1.2797	0.017415
-69.25	1.29835	1.26512	1.28173	0.016615
-69	1.28885	1.26488	1.27686	0.011985
-68.75	1.2875	1.27166	1.27958	0.00792
-68.5	1.29312	1.26985	1.28148	0.011635
-68.25	1.29599	1.26821	1.2821	0.01389
-68	1.28598	1.25889	1.27243	0.013545
-67.75	1.29824	1.26531	1.28178	0.016465
-67.5	1.29565	1.29158	1.29361	0.002035
-67.25	1.30021	1.27082	1.28552	0.014695
-67	1.2979	1.2785	1.2882	0.0097
-66.75	1.29509	1.26028	1.27768	0.017405
-66.5	1.2961	1.26016	1.27813	0.01797
-66.25	1.29076	1.25284	1.2718	0.01896
-66	1.29352	1.26682	1.28017	0.01335
-65.75	1.29189	1.26506	1.27848	0.013415
-65.5	1.29565	1.25968	1.27766	0.017985
-65.25	1.29279	1.25514	1.27397	0.018825
-65	1.28312	1.25532	1.26922	0.0139
-64.75	1.29127	1.26355	1.27741	0.01386
-64.5	1.28773	1.26991	1.27882	0.00891
-64.25	1.29627	1.25005	1.27316	0.02311
-64	1.29295	1.26512	1.27903	0.013915
-63.75	1.28525	1.2555	1.27038	0.014875
-63.5	1.27457	1.26198	1.26828	0.006295
-63.25	1.28902	1.25701	1.27302	0.016005
-63	1.27418	1.25925	1.26672	0.007465
-62.75	1.2893	1.2371	1.2632	0.0261
-62.5	1.28536	1.26034	1.27285	0.01251
-62.25	1.27564	1.23425	1.25495	0.020695
-62	1.28621	1.25998	1.2731	0.013115
-61.75	1.28666	1.23637	1.26151	0.025145
-61.5	1.28362	1.2532	1.26841	0.01521
-61.25	1.27783	1.25253	1.26518	0.01265
-61	1.28289	1.25641	1.26965	0.01324
-60.75	1.28267	1.27263	1.27765	0.00502
-60.5	1.28711	1.24049	1.2638	0.02331
-60.25	1.2771	1.24188	1.25949	0.01761
-60	1.28992	1.24357	1.26675	0.023175
-59.75	1.27738	1.26785	1.27262	0.004765
-59.5	1.27153	1.24018	1.25585	0.015675
-59.25	1.28036	1.24769	1.26402	0.016335
-59	1.27558	1.23431	1.25494	0.020635
-58.75	1.27221	1.24872	1.26046	0.011745
-58.5	1.27676	1.23564	1.2562	0.02056
-58.25	1.27614	1.22868	1.25241	0.02373
-58	1.27468	1.22953	1.25211	0.022575
-57.75	1.26102	1.2179	1.23946	0.02156
-57.5	1.27069	1.2038	1.23725	0.033445
-57.25	1.26484	1.22154	1.24319	0.02165
-57	1.26456	1.21112	1.23784	0.02672
-56.75	1.27052	1.21482	1.24267	0.02785
-56.5	1.26304	1.21712	1.24008	0.02296
-56.25	1.26445	1.21803	1.24124	0.02321
-56	1.27468	1.20604	1.24036	0.03432
-55.75	1.2726	1.19472	1.23366	0.03894
-55.5	1.27322	1.20513	1.23917	0.034045
-55.25	1.26861	1.20344	1.23603	0.032585
-55	1.26906	1.21003	1.23955	0.029515
-54.75	1.27322	1.22196	1.24759	0.02563
-54.5	1.28148	1.20223	1.24185	0.039625
-54.25	1.26366	1.19024	1.22695	0.03671
-54	1.26591	1.21361	1.23976	0.02615
-53.75	1.26912	1.20634	1.23773	0.03139
-53.5	1.2622	1.21167	1.23693	0.025265
-53.25	1.25247	1.20507	1.22877	0.0237
-53	1.24247	1.20804	1.22525	0.017215
-52.75	1.23701	1.19799	1.2175	0.01951
-52.5	1.23454	1.20519	1.21986	0.014675
-52.25	1.22459	1.20907	1.21683	0.00776
-52	1.22346	1.19938	1.21142	0.01204
-51.75	1.21705	1.22741	1.22223	0.00518
-51.5	1.22464	1.20174	1.21319	0.01145
-51.25	1.21604	1.20005	1.20805	0.007995
-51	1.23032	1.21246	1.22139	0.00893
-50.75	1.22076	1.20786	1.21431	0.00645
-50.5	1.23392	1.20186	1.21789	0.01603
-50.25	1.22599	1.20059	1.21329	0.0127
-50	1.22672	1.21803	1.22237	0.004345
-49.75	1.22588	1.20005	1.21297	0.012915
-49.5	1.22819	1.2084	1.21829	0.009895
-49.25	1.21941	1.19466	1.20704	0.012375
-49	1.22993	1.21016	1.22004	0.009885
-48.75	1.22599	1.18982	1.20791	0.018085
-48.5	1.22037	1.18806	1.20422	0.016155
-48.25	1.21958	1.19811	1.20885	0.010735
-48	1.22369	1.19133	1.20751	0.01618
-47.75	1.21424	1.19448	1.20436	0.00988
-47.5	1.21435	1.17904	1.1967	0.017655
-47.25	1.21093	1.19072	1.20083	0.010105
-47	1.20845	1.17426	1.19136	0.017095
-46.75	1.20468	1.19133	1.198	0.006675
-46.5	1.21048	1.18679	1.19863	0.011845
-46.25	1.20935	1.19884	1.20409	0.005255
-46	1.20187	1.19944	1.20066	0.001215
-45.75	1.19648	1.19054	1.19351	0.00297
-45.5	1.19485	1.20101	1.19793	0.00308
-45.25	1.20474	1.18909	1.19691	0.007825
-45	1.20182	1.19472	1.19827	0.00355
-44.75	1.19917	1.18739	1.19328	0.00589
-44.5	1.19974	1.18649	1.19312	0.006625
-44.25	1.20429	1.21845	1.21137	0.00708
-44	1.19018	1.19254	1.19136	0.00118
-43.75	1.17719	1.19436	1.18578	0.008585
-43.5	1.18709	1.1929	1.19	0.002905
-43.25	1.18506	1.17232	1.17869	0.00637
-43	1.18253	1.18848	1.18551	0.002975
-42.75	1.18883	1.19853	1.19368	0.00485
-42.5	1.18248	1.17722	1.17985	0.00263
-42.25	1.19001	1.18982	1.18992	9.5e-05
-42	1.18085	1.18055	1.1807	0.00015
-41.75	1.17044	1.18534	1.17789	0.00745
-41.5	1.17922	1.18249	1.18085	0.001635
-41.25	1.17157	1.19024	1.18091	0.009335
-41	1.17534	1.17898	1.17716	0.00182
-40.75	1.17213	1.17783	1.17498	0.00285
-40.5	1.16381	1.16838	1.16609	0.002285
-40.25	1.18366	1.18842	1.18604	0.00238
-40	1.17213	1.18122	1.17667	0.004545
-39.75	1.17157	1.1877	1.17963	0.008065
-39.5	1.17084	1.17335	1.1721	0.001255
-39.25	1.16977	1.17704	1.17341	0.003635
-39	1.16173	1.18291	1.17232	0.01059
-38.75	1.17129	1.18419	1.17774	0.00645
-38.5	1.16746	1.18182	1.17464	0.00718
-38.25	1.16938	1.1722	1.17079	0.00141
-38	1.17759	1.18588	1.18173	0.004145
-37.75	1.16999	1.18061	1.1753	0.00531
-37.5	1.16156	1.18158	1.17157	0.01001
-37.25	1.16668	1.17087	1.16878	0.002095
-37	1.16089	1.1886	1.17475	0.013855
-36.75	1.16966	1.17977	1.17471	0.005055
-36.5	1.16561	1.18788	1.17674	0.011135
-36.25	1.16162	1.17674	1.16918	0.00756
-36	1.15971	1.16548	1.1626	0.002885
-35.75	1.15369	1.1745	1.1641	0.010405
-35.5	1.16038	1.17892	1.16965	0.00927
-35.25	1.15695	1.17093	1.16394	0.00699
-35	1.16184	1.17305	1.16744	0.005605
-34.75	1.15437	1.15961	1.15699	0.00262
-34.5	1.15465	1.16675	1.1607	0.00605
-34.25	1.14908	1.1722	1.16064	0.01156
-34	1.15037	1.17795	1.16416	0.01379
-33.75	1.15133	1.17989	1.16561	0.01428
-33.5	1.15217	1.17389	1.16303	0.01086
-33.25	1.15004	1.1705	1.16027	0.01023
-33	1.15279	1.17904	1.16592	0.013125
-32.75	1.15408	1.16723	1.16065	0.006575
-32.5	1.14177	1.17008	1.15592	0.014155
-32.25	1.15498	1.16282	1.1589	0.00392
-32	1.14273	1.16433	1.15353	0.0108
-31.75	1.15155	1.1547	1.15313	0.001575
-31.5	1.14829	1.15095	1.14962	0.00133
-31.25	1.156	1.1676	1.1618	0.0058
-31	1.15178	1.17365	1.16271	0.010935
-30.75	1.14745	1.1696	1.15853	0.011075
-30.5	1.1502	1.14599	1.1481	0.002105
-30.25	1.14649	1.16257	1.15453	0.00804
-30	1.14571	1.15949	1.1526	0.00689
-29.75	1.1506	1.16663	1.15862	0.008015
-29.5	1.14014	1.16427	1.1522	0.012065
-29.25	1.14537	1.16633	1.15585	0.01048
-29	1.14149	1.14714	1.14431	0.002825
-28.75	1.13952	1.17468	1.1571	0.01758
-28.5	1.14329	1.16548	1.15438	0.011095
-28.25	1.14233	1.16051	1.15142	0.00909
-28	1.15414	1.18806	1.1711	0.01696
-27.75	1.13817	1.16245	1.15031	0.01214
-27.5	1.15425	1.16566	1.15996	0.005705
-27.25	1.14841	1.15688	1.15264	0.004235
-27	1.13429	1.1659	1.15009	0.015805
-26.75	1.13868	1.17359	1.15613	0.017455
-26.5	1.13525	1.1699	1.15258	0.017325
-26.25	1.13716	1.1455	1.14133	0.00417
-26	1.14329	1.15658	1.14993	0.006645
-25.75	1.13784	1.16058	1.14921	0.01137
-25.5	1.14902	1.15495	1.15198	0.002965
-25.25	1.13918	1.16251	1.15084	0.011665
-25	1.13739	1.16487	1.15113	0.01374
-24.75	1.15026	1.15785	1.15406	0.003795
-24.5	1.13216	1.14514	1.13865	0.00649
-24.25	1.12311	1.15531	1.13921	0.0161
-24	1.14177	1.15404	1.1479	0.006135
-23.75	1.138	1.16536	1.15168	0.01368
-23.5	1.13947	1.14695	1.14321	0.00374
-23.25	1.13379	1.15077	1.14228	0.00849
-23	1.1321	1.15488	1.14349	0.01139
-22.75	1.13823	1.14477	1.1415	0.00327
-22.5	1.1384	1.14593	1.14216	0.003765
-22.25	1.12457	1.14544	1.13501	0.010435
-22	1.13542	1.13491	1.13517	0.000255
-21.75	1.13497	1.14986	1.14242	0.007445
-21.5	1.13283	1.14544	1.13914	0.006305
-21.25	1.13637	1.16233	1.14935	0.01298
-21	1.12766	1.14508	1.13637	0.00871
-20.75	1.13221	1.14447	1.13834	0.00613
-20.5	1.13789	1.15222	1.14506	0.007165
-20.25	1.13469	1.1458	1.14024	0.005555
-20	1.13913	1.14175	1.14044	0.00131
-19.75	1.12474	1.14429	1.13451	0.009775
-19.5	1.13294	1.14877	1.14086	0.007915
-19.25	1.12513	1.14568	1.1354	0.010275
-19	1.13317	1.12934	1.13125	0.001915
-18.75	1.12592	1.13799	1.13196	0.006035
-18.5	1.11152	1.12213	1.11682	0.005305
-18.25	1.12991	1.12595	1.12793	0.00198
-18	1.12417	1.1426	1.13339	0.009215
-17.75	1.12102	1.13067	1.12584	0.004825
-17.5	1.12592	1.13781	1.13186	0.005945
-17.25	1.11984	1.13497	1.1274	0.007565
-17	1.12603	1.13957	1.1328	0.00677
-16.75	1.12204	1.13933	1.13068	0.008645
-16.5	1.12181	1.14508	1.13345	0.011635
-16.25	1.11939	1.1435	1.13145	0.012055
-16	1.11849	1.13709	1.12779	0.0093
-15.75	1.12434	1.13739	1.13087	0.006525
-15.5	1.10894	1.1225	1.11572	0.00678
-15.25	1.12811	1.13019	1.12915	0.00104
-15	1.1262	1.13267	1.12943	0.003235
-14.75	1.133	1.12086	1.12693	0.00607
-14.5	1.12457	1.12952	1.12705	0.002475
-14.25	1.12384	1.1498	1.13682	0.01298
-14	1.12091	1.13224	1.12657	0.005665
-13.75	1.12766	1.14253	1.1351	0.007435
-13.5	1.11973	1.14199	1.13086	0.01113
-13.25	1.11006	1.13127	1.12067	0.010605
-13	1.12389	1.12104	1.12247	0.001425
-12.75	1.11793	1.11245	1.11519	0.00274
-12.5	1.12541	1.12117	1.12329	0.00212
-12.25	1.11417	1.13497	1.12457	0.0104
-12	1.12625	1.14677	1.13651	0.01026
-11.75	1.13154	1.11886	1.1252	0.00634
-11.5	1.11816	1.11899	1.11857	0.000415
-11.25	1.10809	1.12316	1.11563	0.007535
-11	1.10967	1.12613	1.1179	0.00823
-10.75	1.11945	1.13261	1.12603	0.00658
-10.5	1.12041	1.11717	1.11879	0.00162
-10.25	1.12063	1.11844	1.11953	0.001095
-10	1.10804	1.11451	1.11128	0.003235
-9.75	1.10927	1.11729	1.11328	0.00401
-9.5	1.11512	1.11729	1.1162	0.001085
-9.25	1.10472	1.12123	1.11298	0.008255
-9	1.11372	1.12141	1.11756	0.003845
-8.75	1.11299	1.10476	1.10887	0.004115
-8.5	1.11158	1.10464	1.10811	0.00347
-8.25	1.10371	1.12758	1.11564	0.011935
-8	1.11164	1.1113	1.11147	0.00017
-7.75	1.11552	1.13261	1.12406	0.008545
-7.5	1.11782	1.11753	1.11767	0.000145
-7.25	1.11776	1.10966	1.11371	0.00405
-7	1.10062	1.09259	1.0966	0.004015
-6.75	1.10787	1.10615	1.10701	0.00086
-6.5	1.10056	1.12643	1.11349	0.012935
-6.25	1.10315	1.11717	1.11016	0.00701
-6	1.10809	1.12988	1.11898	0.010895
-5.75	1.11124	1.11148	1.11136	0.00012
-5.5	1.1086	1.0958	1.1022	0.0064
-5.25	1.10703	1.11669	1.11186	0.00483
-5	1.11164	1.11838	1.11501	0.00337
-4.75	1.10298	1.11493	1.10895	0.005975
-4.5	1.0987	1.11348	1.10609	0.00739
-4.25	1.09668	1.09828	1.09748	0.0008
-4	1.09606	1.13872	1.11739	0.02133
-3.75	1.09685	1.09949	1.09817	0.00132
-3.5	1.10944	1.11099	1.11021	0.000775
-3.25	1.0955	1.11796	1.10673	0.01123
-3	1.09837	1.12322	1.11079	0.012425
-2.75	1.1005	1.11106	1.10578	0.00528
-2.5	1.09983	1.12189	1.11086	0.01103
-2.25	1.09809	1.1142	1.10615	0.008055
-2	1.10157	1.11644	1.10901	0.007435
-1.75	1.10944	1.11045	1.10994	0.000505
-1.5	1.10939	1.11233	1.11086	0.00147
-1.25	1.09578	1.11771	1.10675	0.010965
-1	1.10298	1.12183	1.11241	0.009425
-0.75	1.10635	1.1119	1.10913	0.002775
-0.5	1.10573	1.109	1.10737	0.001635
-0.25	1.10663	1.10803	1.10733	0.0007
0	1.11259	1.11493	1.11376	0.00117
0.25	1.10123	1.11208	1.10665	0.005425
0.5	1.10635	1.12353	1.11494	0.00859
0.75	1.11242	1.11699	1.1147	0.002285
1	1.11951	1.12334	1.12142	0.001915
1.25	1.10882	1.12038	1.1146	0.00578
1.5	1.1122	1.11208	1.11214	6e-05
1.75	1.11074	1.10809	1.10942	0.001325
2	1.11698	1.10597	1.11147	0.005505
2.25	1.11355	1.10391	1.10873	0.00482
2.5	1.10809	1.12074	1.11442	0.006325
2.75	1.12102	1.10143	1.11122	0.009795
3	1.10613	1.10203	1.10408	0.00205
3.25	1.10843	1.10912	1.10878	0.000345
3.5	1.11102	1.09483	1.10292	0.008095
3.75	1.10011	1.0823	1.0912	0.008905
4	1.10568	1.07625	1.09096	0.014715
4.25	1.10568	1.06626	1.08597	0.01971
4.5	1.10258	1.0533	1.07794	0.02464
4.75	1.1009	1.05627	1.07858	0.022315
5	1.10534	1.06377	1.08455	0.020785
5.25	1.10258	1.04138	1.07198	0.0306
5.5	1.1068	1.0481	1.07745	0.02935
5.75	1.09072	1.05185	1.07129	0.019435
6	1.09033	1.04319	1.06676	0.02357
6.25	1.07391	1.04876	1.06133	0.012575
6.5	1.08071	1.03974	1.06022	0.020485
6.75	1.06452	1.0487	1.05661	0.00791
7	1.06486	1.04864	1.05675	0.00811
7.25	1.06626	1.01359	1.03992	0.026335
7.5	1.06317	1.03187	1.04752	0.01565
7.75	1.05316	1.03962	1.04639	0.00677
8	1.04816	1.02424	1.0362	0.01196
8.25	1.04608	1.02739	1.03673	0.009345
8.5	1.05401	1.01843	1.03622	0.01779
8.75	1.04839	1.02122	1.0348	0.013585
9	1.03388	1.0283	1.03109	0.00279
9.25	1.04355	1.0355	1.03953	0.004025
9.5	1.03663	1.00191	1.01927	0.01736
9.75	1.03613	1.01855	1.02734	0.00879
10	1.02472	1.01135	1.01804	0.006685
10.25	1.01471	1.0283	1.0215	0.006795
10.5	1.03191	1.00475	1.01833	0.01358
10.75	1.01937	1.00039	1.00988	0.00949
11	1.02342	0.99652	1.00997	0.01345
11.25	1.01926	0.98338	1.00132	0.01794
11.5	1.01561	0.9838	0.999705	0.015905
11.75	1.0169	0.99851	1.00771	0.009195
12	1.00807	0.9838	0.995935	0.012135
12.25	1.01634	1.00445	1.01039	0.005945
12.5	1.01263	0.98459	0.99861	0.01402
12.75	1.0151	0.98671	1.0009	0.014195
13	0.99677	0.99228	0.994525	0.002245
13.25	1.00796	0.99785	1.0029	0.005055
13.5	1.00774	0.98253	0.995135	0.012605
13.75	1.00037	0.98834	0.994355	0.006015
14	0.99795	0.98804	0.992995	0.004955
14.25	1.00133	0.9881	0.994715	0.006615
14.5	0.98811	0.9677	0.977905	0.010205
14.75	1.00211	0.96994	0.986025	0.016085
15	0.9934	0.97309	0.983245	0.010155
15.25	0.97563	0.95686	0.966245	0.009385
15.5	0.9916	0.97654	0.98407	0.00753
15.75	0.98991	0.96952	0.979715	0.010195
16	0.98587	0.96201	0.97394	0.01193
16.25	0.97451	0.95045	0.96248	0.01203
16.5	0.97586	0.95929	0.967575	0.008285
16.75	0.96928	0.947	0.95814	0.01114
17	0.97766	0.95378	0.96572	0.01194
17.25	0.97265	0.95275	0.9627	0.00995
17.5	0.97029	0.95099	0.96064	0.00965
17.75	0.97158	0.95378	0.96268	0.0089
18	0.96652	0.94119	0.953855	0.012665
18.25	0.96017	0.95965	0.95991	0.00026
18.5	0.97608	0.95372	0.9649	0.01118
18.75	0.96146	0.96467	0.963065	0.001605
19	0.96287	0.96013	0.9615	0.00137
19.25	0.95652	0.93834	0.94743	0.00909
19.5	0.96956	0.947	0.95828	0.01128
19.75	0.95449	0.94318	0.948835	0.005655
20	0.96107	0.94367	0.95237	0.0087
20.25	0.96225	0.93319	0.94772	0.01453
20.5	0.95151	0.92684	0.939175	0.012335
20.75	0.95101	0.93507	0.94304	0.00797
21	0.95348	0.94361	0.948545	0.004935
21.25	0.95404	0.93501	0.944525	0.009515
21.5	0.95511	0.93834	0.946725	0.008385
21.75	0.94179	0.94064	0.941215	0.000575
22	0.94196	0.9295	0.93573	0.00623
22.25	0.94246	0.93223	0.937345	0.005115
22.5	0.95331	0.91636	0.934835	0.018475
22.75	0.94471	0.90504	0.924875	0.019835
23	0.95168	0.91273	0.932205	0.019475
23.25	0.95196	0.91939	0.935675	0.016285
23.5	0.93999	0.91873	0.92936	0.01063
23.75	0.9491	0.92696	0.93803	0.01107
24	0.94881	0.91824	0.933525	0.015285
24.25	0.94628	0.90389	0.925085	0.021195
24.5	0.94252	0.90789	0.925205	0.017315
24.75	0.94252	0.92375	0.933135	0.009385
25	0.94201	0.90886	0.925435	0.016575
25.25	0.94645	0.91515	0.9308	0.01565
25.5	0.93661	0.91558	0.926095	0.010515
25.75	0.95039	0.92224	0.936315	0.014075
26	0.94443	0.90674	0.925585	0.018845
26.25	0.94257	0.90238	0.922475	0.020095
26.5	0.93616	0.91316	0.92466	0.0115
26.75	0.9392	0.9186	0.9289	0.0103
27	0.93223	0.90238	0.917305	0.014925
27.25	0.93116	0.90644	0.9188	0.01236
27.5	0.93285	0.89857	0.91571	0.01714
27.75	0.9211	0.90311	0.912105	0.008995
28	0.93133	0.90504	0.918185	0.013145
28.25	0.91997	0.89845	0.90921	0.01076
28.5	0.92256	0.89742	0.90999	0.01257
28.75	0.92694	0.8933	0.91012	0.01682
29	0.91491	0.89185	0.90338	0.01153
29.25	0.93571	0.87568	0.905695	0.030015
29.5	0.9252	0.90008	0.91264	0.01256
29.75	0.92599	0.88222	0.904105	0.021885
30	0.92346	0.88458	0.90402	0.01944
30.25	0.92211	0.88828	0.905195	0.016915
30.5	0.92672	0.86479	0.895755	0.030965
30.75	0.92042	0.86291	0.891665	0.028755
31	0.92318	0.86781	0.895495	0.027685
31.25	0.91829	0.88803	0.90316	0.01513
31.5	0.91379	0.86654	0.890165	0.023625
31.75	0.90648	0.86345	0.884965	0.021515
32	0.90552	0.84917	0.877345	0.028175
32.25	0.89754	0.86491	0.881225	0.016315
32.5	0.89422	0.86188	0.87805	0.01617
32.75	0.89737	0.83809	0.86773	0.02964
33	0.90125	0.83658	0.868915	0.032335
33.25	0.8976	0.83397	0.865785	0.031815
33.5	0.89237	0.84081	0.86659	0.02578
33.75	0.88354	0.82792	0.85573	0.02781
34	0.88405	0.82749	0.85577	0.02828
34.25	0.88691	0.82435	0.85563	0.03128
34.5	0.8836	0.83536	0.85948	0.02412
34.75	0.88332	0.82677	0.855045	0.028275
35	0.88039	0.82967	0.85503	0.02536
35.25	0.88438	0.81515	0.849765	0.034615
35.5	0.86797	0.8393	0.853635	0.014335
35.75	0.87662	0.83064	0.85363	0.02299
36	0.87111	0.82199	0.84655	0.02456
36.25	0.87134	0.81775	0.844545	0.026795
36.5	0.86724	0.8235	0.84537	0.02187
36.75	0.87061	0.82302	0.846815	0.023795
37	0.86381	0.82168	0.842745	0.021065
37.25	0.86409	0.81175	0.83792	0.02617
37.5	0.86178	0.81406	0.83792	0.02386
37.75	0.85768	0.81103	0.834355	0.023325
38	0.85959	0.80655	0.83307	0.02652
38.25	0.85104	0.80903	0.830035	0.021005
38.5	0.86105	0.80171	0.83138	0.02967
38.75	0.85329	0.79928	0.826285	0.027005
39	0.8592	0.80092	0.83006	0.02914
39.25	0.85942	0.79638	0.8279	0.03152
39.5	0.8534	0.80177	0.827585	0.025815
39.75	0.85481	0.77749	0.81615	0.03866
40	0.85206	0.79172	0.82189	0.03017
40.25	0.8565	0.79874	0.82762	0.02888
40.5	0.84846	0.78942	0.81894	0.02952
40.75	0.83766	0.78494	0.8113	0.02636
41	0.84379	0.7939	0.818845	0.024945
41.25	0.83496	0.79166	0.81331	0.02165
41.5	0.83215	0.78052	0.806335	0.025815
41.75	0.84452	0.79468	0.8196	0.02492
42	0.83153	0.76823	0.79988	0.03165
42.25	0.83041	0.77337	0.80189	0.02852
42.5	0.83063	0.78179	0.80621	0.02442
42.75	0.83288	0.75927	0.796075	0.036805
43	0.82512	0.77495	0.800035	0.025085
43.25	0.82653	0.77192	0.799225	0.027305
43.5	0.82108	0.76968	0.79538	0.0257
43.75	0.82625	0.77198	0.799115	0.027135
44	0.82467	0.75243	0.78855	0.03612
44.25	0.81118	0.75461	0.782895	0.028285
44.5	0.82276	0.74607	0.784415	0.038345
44.75	0.81315	0.74504	0.779095	0.034055
45	0.81152	0.75763	0.784575	0.026945
45.25	0.81793	0.74662	0.782275	0.035655
45.5	0.80848	0.74286	0.77567	0.03281
45.75	0.79729	0.75285	0.77507	0.02222
46	0.80607	0.74674	0.776405	0.029665
46.25	0.81118	0.74813	0.779655	0.031525
46.5	0.80207	0.75279	0.77743	0.02464
46.75	0.79971	0.73457	0.76714	0.03257
47	0.80303	0.731	0.767015	0.036015
47.25	0.78909	0.73923	0.76416	0.02493
47.5	0.77739	0.74916	0.763275	0.014115
47.75	0.79105	0.74256	0.766805	0.024245
48	0.78774	0.76974	0.77874	0.009
48.25	0.7892	0.78699	0.788095	0.001105
48.5	0.78335	0.80534	0.794345	0.010995
48.75	0.78701	0.83319	0.8101	0.02309
49	0.78313	0.83948	0.811305	0.028175
49.25	0.78493	0.85219	0.81856	0.03363
49.5	0.80269	0.89439	0.84854	0.04585
49.75	0.80247	0.89409	0.84828	0.04581
50	0.80264	0.91636	0.8595	0.05686
50.25	0.82569	0.93101	0.87835	0.05266
50.5	0.84182	0.93658	0.8892	0.04738
50.75	0.86971	0.95904	0.914375	0.044665
51	0.87415	0.96389	0.91902	0.04487
51.25	0.88978	0.97926	0.93452	0.04474
51.5	0.91429	0.99464	0.954465	0.040175
51.75	0.92143	0.99186	0.956645	0.035215
52	0.94184	1.00039	0.971115	0.029275
52.25	0.95343	1.01262	0.983025	0.029595
52.5	0.97029	1.00203	0.98616	0.01587
52.75	0.9731	1.02933	1.00121	0.028115
53	0.97693	1.0352	1.00606	0.029135
53.25	0.9844	1.01964	1.00202	0.01762
53.5	0.99767	1.03986	1.01876	0.021095
53.75	1.00234	1.03853	1.02043	0.018095
54	1.00965	1.02582	1.01774	0.008085
54.25	1.02297	1.05088	1.03693	0.013955
54.5	1.02398	1.05506	1.03952	0.01554
54.75	1.03231	1.0484	1.04035	0.008045
55	1.03534	1.02836	1.03185	0.00349
55.25	1.03545	1.04549	1.04047	0.00502
55.5	1.04586	1.05167	1.04876	0.002905
55.75	1.04366	1.0352	1.03943	0.00423
56	1.04349	1.06069	1.05209	0.0086
56.25	1.05738	1.06462	1.061	0.00362
56.5	1.05311	1.05572	1.05442	0.001305
56.75	1.05345	1.06014	1.0568	0.003345
57	1.04647	1.06305	1.05476	0.00829
57.25	1.05367	1.05548	1.05458	0.000905
57.5	1.06177	1.06959	1.06568	0.00391
57.75	1.06019	1.06856	1.06438	0.004185
58	1.06531	1.07086	1.06808	0.002775
58.25	1.07048	1.0616	1.06604	0.00444
58.5	1.06328	1.09047	1.07688	0.013595
58.75	1.06666	1.07516	1.07091	0.00425
59	1.06716	1.07903	1.07309	0.005935
59.25	1.05918	1.08726	1.07322	0.01404
59.5	1.07442	1.07007	1.07225	0.002175
59.75	1.07194	1.07098	1.07146	0.00048
60	1.08077	1.06819	1.07448	0.00629
60.25	1.06806	1.08484	1.07645	0.00839
60.5	1.0788	1.09217	1.08549	0.006685
60.75	1.07863	1.0915	1.08506	0.006435
61	1.06936	1.08097	1.07517	0.005805
61.25	1.08054	1.08206	1.0813	0.00076
61.5	1.07875	1.08732	1.08304	0.004285
61.75	1.06879	1.09489	1.08184	0.01305
62	1.07667	1.08787	1.08227	0.0056
62.25	1.08009	1.08545	1.08277	0.00268
62.5	1.08083	1.08303	1.08193	0.0011
62.75	1.08262	1.09883	1.09072	0.008105
63	1.10281	1.08151	1.09216	0.01065
63.25	1.1	1.08369	1.09185	0.008155
63.5	1.09859	1.09598	1.09728	0.001305
63.75	1.09005	1.10494	1.09749	0.007445
64	1.10146	1.09574	1.0986	0.00286
64.25	1.09668	1.09562	1.09615	0.00053
64.5	1.10275	1.09792	1.10033	0.002415
64.75	1.09044	1.10379	1.09712	0.006675
65	1.09516	1.1179	1.10653	0.01137
65.25	1.10095	1.10252	1.10174	0.000785
65.5	1.10022	1.10942	1.10482	0.0046
65.75	1.10433	1.11293	1.10863	0.0043
66	1.10742	1.11862	1.11302	0.0056
66.25	1.1059	1.10579	1.10584	5.5e-05
66.5	1.0982	1.11118	1.10469	0.00649
66.75	1.09629	1.105	1.10065	0.004355
67	1.10506	1.11662	1.11084	0.00578
67.25	1.10607	1.1099	1.10799	0.001915
67.5	1.11225	1.09955	1.1059	0.00635
67.75	1.1109	1.12268	1.11679	0.00589
68	1.11405	1.11771	1.11588	0.00183
68.25	1.10421	1.1179	1.11105	0.006845
68.5	1.1131	1.12316	1.11813	0.00503
68.75	1.11754	1.12135	1.11945	0.001905
69	1.11647	1.12008	1.11828	0.001805
69.25	1.11698	1.13878	1.12788	0.0109
69.5	1.10804	1.12698	1.11751	0.00947
69.75	1.11203	1.13569	1.12386	0.01183
70	1.1217	1.12437	1.12304	0.001335
70.25	1.11771	1.14338	1.13055	0.012835
70.5	1.11062	1.12583	1.11823	0.007605
70.75	1.12119	1.12583	1.12351	0.00232
71	1.1176	1.11899	1.11829	0.000695
71.25	1.11838	1.13351	1.12594	0.007565
71.5	1.11731	1.12419	1.12075	0.00344
71.75	1.11237	1.1179	1.11513	0.002765
72	1.12676	1.12371	1.12523	0.001525
72.25	1.12592	1.1429	1.13441	0.00849
72.5	1.12586	1.14296	1.13441	0.00855
72.75	1.12698	1.14738	1.13718	0.0102
73	1.13053	1.14235	1.13644	0.00591
73.25	1.11731	1.14689	1.1321	0.01479
73.5	1.13131	1.14738	1.13935	0.008035
73.75	1.12817	1.14163	1.1349	0.00673
74	1.12131	1.14151	1.13141	0.0101
74.25	1.12895	1.15131	1.14013	0.01118
74.5	1.13694	1.13963	1.13828	0.001345
74.75	1.12698	1.14895	1.13796	0.010985
75	1.13761	1.14205	1.13983	0.00222
75.25	1.13148	1.15192	1.1417	0.01022
75.5	1.13598	1.13339	1.13468	0.001295
75.75	1.14413	1.1547	1.14942	0.005285
76	1.12384	1.15767	1.14075	0.016915
76.25	1.13806	1.14623	1.14215	0.004085
76.5	1.13115	1.13563	1.13339	0.00224
76.75	1.14003	1.15077	1.1454	0.00537
77	1.12963	1.17353	1.15158	0.02195
77.25	1.13604	1.14217	1.1391	0.003065
77.5	1.13429	1.16808	1.15118	0.016895
77.75	1.13345	1.14502	1.13923	0.005785
78	1.12923	1.15918	1.1442	0.014975
78.25	1.13446	1.16681	1.15063	0.016175
78.5	1.13547	1.16288	1.14918	0.013705
78.75	1.13165	1.15797	1.14481	0.01316
79	1.14211	1.18249	1.1623	0.02019
79.25	1.15071	1.17523	1.16297	0.01226
79.5	1.13368	1.17395	1.15382	0.020135
79.75	1.13604	1.17359	1.15481	0.018775
80	1.13598	1.15198	1.14398	0.008
80.25	1.14616	1.15561	1.15089	0.004725
80.5	1.13407	1.1564	1.14524	0.011165
80.75	1.14413	1.16384	1.15399	0.009855
81	1.15403	1.17317	1.1636	0.00957
81.25	1.15352	1.17734	1.16543	0.01191
81.5	1.14722	1.15743	1.15232	0.005105
81.75	1.1416	1.15616	1.14888	0.00728
82	1.1407	1.14913	1.14492	0.004215
82.25	1.14115	1.14326	1.14221	0.001055
82.5	1.147	1.14653	1.14677	0.000235
82.75	1.14807	1.16917	1.15862	0.01055
83	1.15273	1.16003	1.15638	0.00365
83.25	1.14722	1.16542	1.15632	0.0091
83.5	1.13424	1.13594	1.13509	0.00085
83.75	1.14559	1.16306	1.15433	0.008735
84	1.13682	1.13703	1.13692	0.000105
84.25	1.14042	1.1524	1.14641	0.00599
84.5	1.14093	1.15373	1.14733	0.0064
84.75	1.14807	1.17159	1.15983	0.01176
85	1.14588	1.15113	1.14851	0.002625
85.25	1.14554	1.15301	1.14928	0.003735
85.5	1.13997	1.16584	1.15291	0.012935
85.75	1.14677	1.1616	1.15419	0.007415
86	1.13356	1.17286	1.15321	0.01965
86.25	1.14559	1.17256	1.15908	0.013485
86.5	1.14818	1.1495	1.14884	0.00066
86.75	1.14475	1.1725	1.15863	0.013875
87	1.14233	1.1564	1.14936	0.007035
87.25	1.14177	1.17595	1.15886	0.01709
87.5	1.14638	1.17014	1.15826	0.01188
87.75	1.14835	1.18019	1.16427	0.01592
88	1.14683	1.15434	1.15058	0.003755
88.25	1.15228	1.16905	1.16066	0.008385
88.5	1.14526	1.18885	1.16705	0.021795
88.75	1.15341	1.19787	1.17564	0.02223
89	1.16595	1.19799	1.18197	0.01602
89.25	1.1556	1.18031	1.16796	0.012355
89.5	1.15004	1.18419	1.16711	0.017075
89.75	1.14807	1.19557	1.17182	0.02375
90	1.14807	1.17856	1.16331	0.015245
90.25	1.15521	1.1837	1.16946	0.014245
90.5	1.15358	1.1613	1.15744	0.00386
90.75	1.14509	1.17813	1.16161	0.01652
91	1.14942	1.16602	1.15772	0.0083
91.25	1.15189	1.15531	1.1536	0.00171
91.5	1.14914	1.18249	1.16582	0.016675
91.75	1.1574	1.18939	1.17339	0.015995
92	1.14722	1.16578	1.1565	0.00928
92.25	1.15723	1.17504	1.16614	0.008905
92.5	1.15999	1.21694	1.18846	0.028475
92.75	1.16224	1.21131	1.18677	0.024535
93	1.16066	1.23449	1.19758	0.036915
93.25	1.15673	1.2265	1.19162	0.034885
93.5	1.16016	1.22826	1.19421	0.03405
93.75	1.15628	1.22456	1.19042	0.03414
94	1.16465	1.24158	1.20311	0.038465
94.25	1.16775	1.25199	1.20987	0.04212
94.5	1.16707	1.24466	1.20587	0.038795
94.75	1.17011	1.26761	1.21886	0.04875
95	1.19085	1.2716	1.23123	0.040375
95.25	1.20154	1.2739	1.23772	0.03618
95.5	1.20339	1.25828	1.23083	0.027445
95.75	1.20665	1.27808	1.24236	0.035715
96	1.21728	1.27899	1.24813	0.030855
96.25	1.21542	1.24472	1.23007	0.01465
96.5	1.22678	1.27069	1.24873	0.021955
96.75	1.23105	1.25441	1.24273	0.01168
97	1.23859	1.28062	1.25961	0.021015
97.25	1.23476	1.27584	1.2553	0.02054
97.5	1.23504	1.28686	1.26095	0.02591
97.75	1.24353	1.29352	1.26852	0.024995
98	1.24427	1.28934	1.2668	0.022535
98.25	1.25663	1.28111	1.26887	0.01224
98.5	1.26169	1.28292	1.27231	0.010615
98.75	1.25174	1.24938	1.25056	0.00118
99	1.26259	1.27899	1.27079	0.0082
99.25	1.26366	1.2914	1.27753	0.01387
99.5	1.26361	1.28619	1.2749	0.01129
99.75	1.26034	1.29624	1.27829	0.01795
100	1.27238	1.27929	1.27584	0.003455
100.25	1.27744	1.27881	1.27812	0.000685
100.5	1.26512	1.28262	1.27387	0.00875
100.75	1.25838	1.28135	1.26987	0.011485
101	1.27361	1.28189	1.27775	0.00414
101.25	1.26737	1.27844	1.27291	0.005535
101.5	1.27738	1.29321	1.2853	0.007915
101.75	1.27626	1.29594	1.2861	0.00984
102	1.27985	1.30024	1.29005	0.010195
102.25	1.27378	1.30593	1.28985	0.016075
102.5	1.27243	1.29025	1.28134	0.00891
102.75	1.27687	1.27572	1.27629	0.000575
103	1.26512	1.28189	1.27351	0.008385
103.25	1.27547	1.28922	1.28235	0.006875
103.5	1.2753	1.28843	1.28187	0.006565
103.75	1.2785	1.28867	1.28358	0.005085
104	1.28222	1.30623	1.29422	0.012005
104.25	1.2753	1.29073	1.28302	0.007715
104.5	1.28452	1.28886	1.28669	0.00217
104.75	1.27536	1.26694	1.27115	0.00421
105	1.27783	1.28432	1.28107	0.003245
105.25	1.2771	1.2831	1.2801	0.003
105.5	1.27294	1.29273	1.28283	0.009895
105.75	1.27901	1.28068	1.27984	0.000835
106	1.26928	1.28389	1.27658	0.007305
106.25	1.26473	1.30466	1.28469	0.019965
106.5	1.25843	1.30072	1.27957	0.021145
106.75	1.25753	1.29442	1.27597	0.018445
107	1.26428	1.27784	1.27106	0.00678
107.25	1.26479	1.30157	1.28318	0.01839
107.5	1.26102	1.30641	1.28371	0.022695
107.75	1.25894	1.27414	1.26654	0.0076
108	1.25883	1.30217	1.2805	0.02167
108.25	1.25236	1.2845	1.26843	0.01607
108.5	1.26462	1.28861	1.27662	0.011995
108.75	1.25613	1.28419	1.27016	0.01403
109	1.26827	1.28504	1.27665	0.008385
109.25	1.2631	1.29382	1.27846	0.01536
109.5	1.25163	1.27941	1.26552	0.01389
109.75	1.24904	1.26979	1.25941	0.010375
110	1.2509	1.27493	1.26292	0.012015
110.25	1.24978	1.27009	1.25994	0.010155
110.5	1.2491	1.26482	1.25696	0.00786
110.75	1.25697	1.27421	1.26559	0.00862
111	1.24798	1.27433	1.26116	0.013175
111.25	1.2482	1.26192	1.25506	0.00686
111.5	1.25118	1.27596	1.26357	0.01239
111.75	1.25332	1.27626	1.26479	0.01147
112	1.24387	1.26567	1.25477	0.0109
112.25	1.24949	1.28771	1.2686	0.01911
112.5	1.25455	1.27221	1.26338	0.00883
112.75	1.2482	1.27063	1.25941	0.011215
113	1.24899	1.25689	1.25294	0.00395
113.25	1.23977	1.24618	1.24297	0.003205
113.5	1.23937	1.26379	1.25158	0.01221
113.75	1.23308	1.26785	1.25046	0.017385
114	1.23741	1.26815	1.25278	0.01537
114.25	1.24606	1.27614	1.2611	0.01504
114.5	1.23696	1.26295	1.24995	0.012995
114.75	1.23915	1.26597	1.25256	0.01341
115	1.23206	1.26882	1.25044	0.01838
115.25	1.24865	1.27469	1.26167	0.01302
115.5	1.23707	1.26282	1.24994	0.012875
115.75	1.23319	1.25574	1.24446	0.011275
116	1.24455	1.27505	1.2598	0.01525
116.25	1.23178	1.25477	1.24328	0.011495
116.5	1.23223	1.26373	1.24798	0.01575
116.75	1.22734	1.26525	1.24629	0.018955
117	1.23038	1.26301	1.24669	0.016315
117.25	1.22959	1.27808	1.25384	0.024245
117.5	1.23043	1.2782	1.25432	0.023885
117.75	1.23724	1.28371	1.26048	0.023235
118	1.22897	1.26985	1.24941	0.02044
118.25	1.2279	1.2693	1.2486	0.0207
118.5	1.23341	1.26519	1.2493	0.01589
118.75	1.2369	1.28244	1.25967	0.02277
119	1.23651	1.28153	1.25902	0.02251
119.25	1.2301	1.29212	1.26111	0.03101
119.5	1.23735	1.28898	1.26316	0.025815
119.75	1.23336	1.2851	1.25923	0.02587
120	1.23937	1.29206	1.26572	0.026345
120.25	1.23353	1.29963	1.26658	0.03305
120.5	1.23459	1.28274	1.25867	0.024075
120.75	1.23763	1.29551	1.26657	0.02894
121	1.23162	1.28801	1.25982	0.028195
121.25	1.2351	1.28631	1.26071	0.025605
121.5	1.22942	1.28056	1.25499	0.02557
121.75	1.22476	1.29025	1.25751	0.032745
122	1.22779	1.27251	1.25015	0.02236
122.25	1.23623	1.28274	1.25948	0.023255
122.5	1.23561	1.27027	1.25294	0.01733
122.75	1.2324	1.28522	1.25881	0.02641
123	1.22582	1.30841	1.26711	0.041295
123.25	1.22571	1.30762	1.26667	0.040955
123.5	1.23847	1.30151	1.26999	0.03152
123.75	1.22852	1.3078	1.26816	0.03964
124	1.22993	1.2894	1.25967	0.029735
124.25	1.22341	1.27336	1.24839	0.024975
124.5	1.21615	1.29588	1.25602	0.039865
124.75	1.22526	1.28056	1.25291	0.02765
125	1.22819	1.25562	1.24191	0.013715
125.25	1.22712	1.2848	1.25596	0.02884
125.5	1.22223	1.29128	1.25676	0.034525
125.75	1.21852	1.27433	1.24642	0.027905
126	1.22003	1.2845	1.25226	0.032235
126.25	1.2107	1.2911	1.2509	0.0402
126.5	1.22695	1.30926	1.26811	0.041155
126.75	1.22605	1.29388	1.25997	0.033915
127	1.22869	1.294	1.26134	0.032655
127.25	1.21953	1.28807	1.2538	0.03427
127.5	1.2333	1.29176	1.26253	0.02923
127.75	1.22408	1.29043	1.25726	0.033175
128	1.22515	1.27505	1.2501	0.02495
128.25	1.23133	1.29588	1.26361	0.032275
128.5	1.22453	1.29921	1.26187	0.03734
128.75	1.22121	1.29043	1.25582	0.03461
129	1.22605	1.30345	1.26475	0.0387
129.25	1.23077	1.31471	1.27274	0.04197
129.5	1.23055	1.28649	1.25852	0.02797
129.75	1.22386	1.30569	1.26477	0.040915
130	1.22043	1.31483	1.26763	0.0472
130.25	1.22268	1.30351	1.26309	0.040415
130.5	1.21548	1.29291	1.25419	0.038715
130.75	1.22003	1.31356	1.2668	0.046765
131	1.21222	1.2802	1.24621	0.03399
131.25	1.22453	1.28613	1.25533	0.0308
131.5	1.21953	1.29097	1.25525	0.03572
131.75	1.21149	1.28165	1.24657	0.03508
132	1.21852	1.29194	1.25523	0.03671
132.25	1.22256	1.27554	1.24905	0.02649
132.5	1.22447	1.30266	1.26356	0.039095
132.75	1.22436	1.29576	1.26006	0.0357
133	1.21936	1.2957	1.25753	0.03817
133.25	1.23229	1.33214	1.28222	0.049925
133.5	1.22847	1.33825	1.28336	0.05489
133.75	1.23459	1.32475	1.27967	0.04508
134	1.22802	1.34824	1.28813	0.06011
134.25	1.23212	1.33153	1.28182	0.049705
134.5	1.22166	1.32845	1.27506	0.053395
134.75	1.23443	1.32173	1.27808	0.04365
135	1.22088	1.3187	1.26979	0.04891
135.25	1.22965	1.32142	1.27554	0.045885
135.5	1.20688	1.2805	1.24369	0.03681
135.75	1.22172	1.20029	1.21101	0.010715
136	1.21953	1.10252	1.16102	0.058505
136.25	1.21565	1.05191	1.13378	0.08187
136.5	1.21115	1.01964	1.11539	0.095755
136.75	1.21604	0.98786	1.10195	0.11409
137	1.20924	0.95862	1.08393	0.12531
137.25	1.21031	0.92902	1.06967	0.140645
137.5	1.1931	0.88828	1.04069	0.15241
137.75	1.19012	0.83385	1.01199	0.178135
138	1.16904	0.81751	0.993275	0.175765
138.25	1.16162	0.78433	0.972975	0.188645
138.5	1.12434	0.76278	0.94356	0.18078
138.75	1.12041	0.74347	0.93194	0.18847
139	1.1068	0.73457	0.920685	0.186115
139.25	1.09758	0.71635	0.906965	0.190615
139.5	1.08611	0.70309	0.8946	0.19151
139.75	1.03641	0.6529	0.844655	0.191755
140	1.01178	0.6483	0.83004	0.18174
140.25	0.98142	0.62899	0.805205	0.176215
140.5	0.93251	0.63014	0.781325	0.151185
140.75	0.91188	0.60241	0.757145	0.154735
141	0.86954	0.57663	0.723085	0.146455
141.25	0.83468	0.55961	0.697145	0.137535
141.5	0.80275	0.54284	0.672795	0.129955
141.75	0.78228	0.53679	0.659535	0.122745
142	0.73888	0.517	0.62794	0.11094
142.25	0.70807	0.48691	0.59749	0.11058
142.5	0.68755	0.49611	0.59183	0.09572
142.75	0.66242	0.46645	0.564435	0.097985
143	0.63054	0.47044	0.55049	0.08005
143.25	0.61193	0.43951	0.52572	0.08621
143.5	0.59113	0.44732	0.519225	0.071905
143.75	0.56464	0.42564	0.49514	0.0695
144	0.53445	0.41323	0.47384	0.06061
144.25	0.52298	0.3852	0.45409	0.06889
144.5	0.51652	0.41438	0.46545	0.05107
144.75	0.49898	0.39895	0.448965	0.050015
145	0.47885	0.39925	0.43905	0.0398
145.25	0.45226	0.39102	0.42164	0.03062
145.5	0.43421	0.37104	0.402625	0.031585
145.75	0.4161	0.35784	0.38697	0.02913
146	0.39412	0.35136	0.37274	0.02138
146.25	0.38018	0.3605	0.37034	0.00984
146.5	0.36764	0.33223	0.349935	0.017705
146.75	0.34954	0.30663	0.328085	0.021455
147	0.34408	0.31601	0.330045	0.014035
147.25	0.33694	0.30039	0.318665	0.018275
147.5	0.31963	0.29306	0.306345	0.013285
147.75	0.32013	0.2907	0.305415	0.014715
148	0.29843	0.2878	0.293115	0.005315
148.25	0.28269	0.28386	0.283275	0.000585
148.5	0.26357	0.28532	0.274445	0.010875
148.75	0.26891	0.27442	0.271665	0.002755
149	0.25019	0.28084	0.265515	0.015325
149.25	0.25711	0.26625	0.26168	0.00457
149.5	0.25222	0.28053	0.266375	0.014155
149.75	0.229	0.25081	0.239905	0.010905
150	0.2227	0.24742	0.23506	0.01236
150.25	0.21157	0.24754	0.229555	0.017985
150.5	0.19914	0.22938	0.21426	0.01512
150.75	0.18739	0.22454	0.205965	0.018575
151	0.18497	0.23362	0.209295	0.024325
151.25	0.17525	0.22678	0.201015	0.025765
151.5	0.17238	0.2111	0.19174	0.01936
151.75	0.15501	0.1867	0.170855	0.015845
152	0.15405	0.20589	0.17997	0.02592
152.25	0.14584	0.20952	0.17768	0.03184
152.5	0.13735	0.19439	0.16587	0.02852
152.75	0.14775	0.20432	0.176035	0.028285
153	0.14112	0.18948	0.1653	0.02418
153.25	0.13212	0.18325	0.157685	0.025565
153.5	0.12779	0.17005	0.14892	0.02113
153.75	0.12049	0.16127	0.14088	0.02039
154	0.11841	0.19148	0.154945	0.036535
154.25	0.11143	0.16793	0.13968	0.02825
154.5	0.11571	0.16097	0.13834	0.02263
154.75	0.10193	0.17193	0.13693	0.035
155	0.09485	0.17169	0.13327	0.03842
155.25	0.09912	0.15159	0.125355	0.026235
155.5	0.09535	0.13833	0.11684	0.02149
155.75	0.09755	0.13403	0.11579	0.01824
156	0.09041	0.12846	0.109435	0.019025
156.25	0.09614	0.15141	0.123775	0.027635
156.5	0.10362	0.13918	0.1214	0.01778
156.75	0.08816	0.15298	0.12057	0.03241
157	0.08023	0.12271	0.10147	0.02124
157.25	0.08512	0.14257	0.113845	0.028725
157.5	0.08715	0.12755	0.10735	0.0202
157.75	0.08158	0.13197	0.106775	0.025195
158	0.08237	0.12901	0.10569	0.02332
158.25	0.08248	0.10994	0.09621	0.01373
158.5	0.08422	0.13137	0.107795	0.023575
158.75	0.06786	0.12725	0.097555	0.029695
159	0.06083	0.11884	0.089835	0.029005
159.25	0.05881	0.11236	0.085585	0.026775
159.5	0.06151	0.11006	0.085785	0.024275
159.75	0.06927	0.1008	0.085035	0.015765
160	0.07208	0.12259	0.097335	0.025255
160.25	0.07315	0.11987	0.09651	0.02336
160.5	0.06617	0.10346	0.084815	0.018645
160.75	0.05358	0.09002	0.0718	0.01822
161	0.03334	0.08754	0.06044	0.0271
161.25	0.03767	0.07646	0.057065	0.019395
161.5	0.04565	0.10606	0.075855	0.030205
161.75	0.04897	0.08506	0.067015	0.018045
162	0.04492	0.08415	0.064535	0.019615
162.25	0.03177	0.08033	0.05605	0.02428
162.5	0.02822	0.0859	0.05706	0.02884
162.75	0.04728	0.08905	0.068165	0.020885
163	0.06016	0.09081	0.075485	0.015325
163.25	0.05487	0.10994	0.082405	0.027535
163.5	0.03812	0.11139	0.074755	0.036635
163.75	0.04312	0.08863	0.065875	0.022755
164	0.03818	0.09202	0.0651	0.02692
164.25	0.05223	0.07852	0.065375	0.013145
164.5	0.04813	0.08112	0.064625	0.016495
164.75	0.04734	0.07507	0.061205	0.013865
165	0.03587	0.06895	0.05241	0.01654
165.25	0.03604	0.0971	0.06657	0.03053
165.5	0.04048	0.0744	0.05744	0.01696
165.75	0.04503	0.0767	0.060865	0.015835
166	0.03002	0.07949	0.054755	0.024735
166.25	0.03227	0.05715	0.04471	0.01244
166.5	0.03143	0.05993	0.04568	0.01425
166.75	0.03806	0.08106	0.05956	0.0215
167	0.02912	0.06036	0.04474	0.01562
167.25	0.02322	0.0586	0.04091	0.01769
167.5	0.03064	0.0609	0.04577	0.01513
167.75	0.03913	0.0543	0.046715	0.007585
168	0.02193	0.08112	0.051525	0.029595
168.25	0.04582	0.07773	0.061775	0.015955
168.5	0.0416	0.07634	0.05897	0.01737
168.75	0.02716	0.09147	0.059315	0.032155
169	0.03767	0.05691	0.04729	0.00962
169.25	0.03913	0.05291	0.04602	0.00689
169.5	0.02811	0.052	0.040055	0.011945
169.75	0.02243	0.05909	0.04076	0.01833
170	0.03463	0.05678	0.045705	0.011075
170.25	0.0533	0.08015	0.066725	0.013425
170.5	0.04948	0.06659	0.058035	0.008555
170.75	0.05499	0.07065	0.06282	0.00783
171	0.04267	0.0603	0.051485	0.008815
171.25	0.0547	0.0514	0.05305	0.00165
171.5	0.05161	0.06653	0.05907	0.00746
171.75	0.04166	0.07035	0.056005	0.014345
172	0.03677	0.06677	0.05177	0.015
172.25	0.03565	0.0629	0.049275	0.013625
172.5	0.04503	0.07016	0.057595	0.012565
172.75	0.03075	0.05267	0.04171	0.01096
173	0.02648	0.05533	0.040905	0.014425
173.25	0.02221	0.03838	0.030295	0.008085
173.5	0.02007	0.04365	0.03186	0.01179
173.75	0.02761	0.05654	0.042075	0.014465
174	0.01507	0.01677	0.01592	0.00085
174.25	0.00804	0.01937	0.013705	0.005665
174.5	0.00551	0.01804	0.011775	0.006265
174.75	0.00011	0.03106	0.015585	0.015475
175	0.00573	0.02143	0.01358	0.00785
175.25	0.00405	0.02397	0.01401	0.00996
175.5	0.01085	0.00369	0.00727	0.00358
175.75	0.01231	0.01713	0.01472	0.00241
176	0.01377	0.01828	0.016025	0.002255
176.25	0.00703	-0.002	0.002515	0.004515
176.5	0.00231	0.00926	0.005785	0.003475

## Sheet: Fig. 3B
	O2 Consumption Rate
	Time (min)	Chamber 1	Chamber 2	Average	SE				adjusted time	Time (hrs)	Ch 1, Lactate, umol/ million cells/min	Ch 2, Lactate, umol/ million cells/min	Ch 1, Pyruvate, nmol /million cells/min	Ch 2 Pyruvate, nmol /million cells/min	Lactate, umol/ million cells/min	SE	Pyruvate, nmol /million cells/min	SE
	-45	0.80541	0.60653	0.70597	0.09944				-10	-0.166667	0.0143	0.0121	0.001671	1.2e-05	0.0132	0.0011	0.0008415	0.0008295
	-44.75	0.79617	0.60173	0.69895	0.09722				-5	-0.0833333	0.0239	0.0144	0.001068	0.001347	0.01915	0.00475	0.0012075	0.0001395
	-44.5	0.8049	0.6063	0.7056	0.0993				0	0	0.0281	0.0181	0.000874	0.000436	0.0231	0.005	0.000655	0.000219
	-44.25	0.80624	0.60512	0.70568	0.10056				5	0.0833333	0.0323	0.0514	0.00134	0.001205	0.04185	0.00955	0.0012725	6.75e-05
	-44	0.79903	0.60908	0.704055	0.094975				15	0.25	0.3182	0.2085	0.000558	0.0107	0.26335	0.05485	0.005629	0.005071
	-43.75	0.79915	0.60187	0.70051	0.09864				25	0.416667	0.4529	0.2002	0.018382	0.02986	0.32655	0.12635	0.024121	0.005739
	-43.5	0.79581	0.60278	0.699295	0.096515				35	0.583333	0.3677	0.1897	0.039799	0.044283	0.2787	0.089	0.042041	0.002242
	-43.25	0.79629	0.60345	0.69987	0.09642				45	0.75	0.3677	0.15855	0.047998	0.037231	0.263125	0.104575	0.0426145	0.0053835
	-43	0.79683	0.60764	0.702235	0.094595				50	0.833333	0.1395	0.1274	0.04441	0.054548	0.13345	0.00605	0.049479	0.005069
	-42.75	0.80019	0.60304	0.701615	0.098575				60	1	0.0463	0.024	0.063738	0.093945	0.03515	0.01115	0.0788415	0.0151035
	-42.5	0.80022	0.60134	0.70078	0.09944				70	1.16667	0.0835	0.0525	0.122958	0.109231	0.068	0.0155	0.109231	0.0068635
	-42.25	0.79954	0.60835	0.703945	0.095595				80	1.33333	0.0354	0.044	0.107125	0.086538	0.0397	0.0043	0.0968315	0.0102935
	-42	0.79882	0.60017	0.699495	0.099325				90	1.5	0.0486	0.035	0.131664	0.076361	0.0418	0.0068	0.104013	0.0276515
	-41.75	0.79647	0.59847	0.69747	0.099				100	1.66667	0.0542	0.022	0.110773	0.093745	0.0381	0.0161	0.102259	0.008514
	-41.5	0.79429	0.59812	0.696205	0.098085				105	1.75	0.0598	0.03445	0.094957	0.084699	0.047125	0.012675	0.089828	0.005129
	-41.25	0.79176	0.59581	0.693785	0.097975				115	1.91667	0.1192	0.0469	0.104431	0.061961	0.08305	0.03615	0.083196	0.021235
	-41	0.79179	0.59839	0.69509	0.0967				125	2.08333	0.1566	0.1251	0.089019	0.034748	0.14085	0.01575	0.0618835	0.0271355
	-40.75	0.79644	0.60055	0.698495	0.097945				135	2.25	0.1652	0.1459	0.06887	0.024386	0.15555	0.00965	0.046628	0.022242
	-40.5	0.79322	0.59757	0.695395	0.097825				145	2.41667	0.1609	0.1423	0.024666	0.027552	0.1516	0.0093	0.026109	0.001443
	-40.25	0.79507	0.59883	0.69695	0.09812				155	2.58333	0.16305	0.1328	0.044434	0.025935	0.147925	0.015125	0.0351845	0.0092495
	-40	0.79489	0.59803	0.69646	0.09843				165	2.75			0.050069	0.030174			0.0401215	0.0099475
	-39.75	0.79036	0.59595	0.693155	0.097205
	-39.5	0.78986	0.59402	0.69194	0.09792
	-39.25	0.79188	0.59244	0.69216	0.09972
	-39	0.79069	0.59967	0.69518	0.09551
	-38.75	0.79155	0.59546	0.693505	0.098045
	-38.5	0.78265	0.59343	0.68804	0.09461
	-38.25	0.79176	0.58924	0.6905	0.10126
	-38	0.78857	0.59663	0.6926	0.09597
	-37.75	0.78664	0.59824	0.69244	0.0942
	-37.5	0.7847	0.59094	0.68782	0.09688
	-37.25	0.79152	0.59094	0.69123	0.10029
	-37	0.78461	0.59156	0.688085	0.096525
	-36.75	0.78649	0.58763	0.68706	0.09943
	-36.5	0.78175	0.59458	0.688165	0.093585
	-36.25	0.78443	0.58675	0.68559	0.09884
	-36	0.77853	0.59496	0.686745	0.091785
	-35.75	0.78387	0.59522	0.689545	0.094325
	-35.5	0.79179	0.5922	0.691995	0.099795
	-35.25	0.78053	0.59176	0.686145	0.094385
	-35	0.78125	0.59408	0.687665	0.093585
	-34.75	0.77976	0.59666	0.68821	0.09155
	-34.5	0.78211	0.58693	0.68452	0.09759
	-34.25	0.78309	0.59279	0.68794	0.09515
	-34	0.78565	0.59759	0.69162	0.09403
	-33.75	0.78294	0.59584	0.68939	0.09355
	-33.5	0.77982	0.59282	0.68632	0.0935
	-33.25	0.77812	0.59176	0.68494	0.09318
	-33	0.77645	0.59543	0.68594	0.09051
	-32.75	0.78145	0.58995	0.6857	0.09575
	-32.5	0.77562	0.59502	0.68532	0.0903
	-32.25	0.77708	0.58898	0.68303	0.09405
	-32	0.7777	0.58819	0.682945	0.094755
	-31.75	0.77773	0.58526	0.681495	0.096235
	-31.5	0.78095	0.59109	0.68602	0.09493
	-31.25	0.77445	0.58538	0.679915	0.094535
	-31	0.77448	0.58755	0.681015	0.093465
	-30.75	0.77901	0.58511	0.68206	0.09695
	-30.5	0.77839	0.59171	0.68505	0.09334
	-30.25	0.77338	0.58889	0.681135	0.092245
	-30	0.77725	0.59282	0.685035	0.092215
	-29.75	0.77514	0.58957	0.682355	0.092785
	-29.5	0.76814	0.58523	0.676685	0.091455
	-29.25	0.77416	0.58043	0.677295	0.096865
	-29	0.77284	0.58371	0.678275	0.094565
	-28.75	0.77016	0.58371	0.676935	0.093225
	-28.5	0.77475	0.58711	0.68093	0.09382
	-28.25	0.77201	0.58435	0.67818	0.09383
	-28	0.77389	0.58441	0.67915	0.09474
	-27.75	0.77243	0.5845	0.678465	0.093965
	-27.5	0.77734	0.57896	0.67815	0.09919
	-27.25	0.76555	0.58538	0.675465	0.090085
	-27	0.77022	0.58506	0.67764	0.09258
	-26.75	0.76367	0.58544	0.674555	0.089115
	-26.5	0.7699	0.58526	0.67758	0.09232
	-26.25	0.7645	0.58122	0.67286	0.09164
	-26	0.7654	0.58189	0.673645	0.091755
	-25.75	0.76558	0.57767	0.671625	0.093955
	-25.5	0.76629	0.57946	0.672875	0.093415
	-25.25	0.7662	0.57799	0.672095	0.094105
	-25	0.76713	0.57773	0.67243	0.0947
	-24.75	0.76185	0.57741	0.66963	0.09222
	-24.5	0.75986	0.58634	0.6731	0.08676
	-24.25	0.76316	0.57884	0.671	0.09216
	-24	0.76635	0.57703	0.67169	0.09466
	-23.75	0.76024	0.57829	0.669265	0.090975
	-23.5	0.75881	0.57474	0.666775	0.092035
	-23.25	0.75869	0.57137	0.66503	0.09366
	-23	0.75646	0.57609	0.666275	0.090185
	-22.75	0.75718	0.57457	0.665875	0.091305
	-22.5	0.75706	0.57228	0.66467	0.09239
	-22.25	0.76278	0.57436	0.66857	0.09421
	-22	0.75986	0.57457	0.667215	0.092645
	-21.75	0.76349	0.57427	0.66888	0.09461
	-21.5	0.76033	0.57782	0.669075	0.091255
	-21.25	0.75435	0.57665	0.6655	0.08885
	-21	0.75819	0.57246	0.665325	0.092865
	-20.75	0.75467	0.57767	0.66617	0.0885
	-20.5	0.75515	0.57758	0.666365	0.088785
	-20.25	0.75628	0.57896	0.66762	0.08866
	-20	0.75375	0.57193	0.66284	0.09091
	-19.75	0.75947	0.57445	0.66696	0.09251
	-19.5	0.75146	0.57741	0.664435	0.087025
	-19.25	0.75813	0.57416	0.666145	0.091985
	-19	0.74964	0.57647	0.663055	0.086585
	-18.75	0.75786	0.57363	0.665745	0.092115
	-18.5	0.7494	0.57017	0.659785	0.089615
	-18.25	0.75476	0.57278	0.66377	0.09099
	-18	0.74988	0.5717	0.66079	0.08909
	-17.75	0.74594	0.57088	0.65841	0.08753
	-17.5	0.74705	0.56777	0.65741	0.08964
	-17.25	0.75038	0.56449	0.657435	0.092945
	-17	0.74994	0.56592	0.65793	0.09201
	-16.75	0.74422	0.56551	0.654865	0.089355
	-16.5	0.75089	0.56745	0.65917	0.09172
	-16.25	0.75241	0.56595	0.65918	0.09323
	-16	0.74818	0.56546	0.65682	0.09136
	-15.75	0.74669	0.56551	0.6561	0.09059
	-15.5	0.7488	0.57006	0.65943	0.08937
	-15.25	0.74916	0.56188	0.65552	0.09364
	-15	0.74803	0.56437	0.6562	0.09183
	-14.75	0.75146	0.56124	0.65635	0.09511
	-14.5	0.74836	0.5637	0.65603	0.09233
	-14.25	0.74481	0.56288	0.653845	0.090965
	-14	0.74285	0.56115	0.652	0.09085
	-13.75	0.74556	0.5637	0.65463	0.09093
	-13.5	0.73713	0.56015	0.64864	0.08849
	-13.25	0.74088	0.56255	0.651715	0.089165
	-13	0.73811	0.56443	0.65127	0.08684
	-12.75	0.73879	0.55678	0.647785	0.091005
	-12.5	0.74046	0.55916	0.64981	0.09065
	-12.25	0.74258	0.56314	0.65286	0.08972
	-12	0.7396	0.5581	0.64885	0.09075
	-11.75	0.7382	0.56258	0.65039	0.08781
	-11.5	0.73602	0.55693	0.646475	0.089545
	-11.25	0.73459	0.55825	0.64642	0.08817
	-11	0.73957	0.56006	0.649815	0.089755
	-10.75	0.73671	0.55549	0.6461	0.09061
	-10.5	0.73397	0.56047	0.64722	0.08675
	-10.25	0.73525	0.55746	0.646355	0.088895
	-10	0.73906	0.56294	0.651	0.08806
	-9.75	0.7343	0.55494	0.64462	0.08968
	-9.5	0.73486	0.55432	0.64459	0.09027
	-9.25	0.73677	0.55737	0.64707	0.0897
	-9	0.73582	0.5586	0.64721	0.08861
	-8.75	0.73474	0.55675	0.645745	0.088995
	-8.5	0.73185	0.55921	0.64553	0.08632
	-8.25	0.72846	0.55511	0.641785	0.086675
	-8	0.73001	0.55702	0.643515	0.086495
	-7.75	0.73108	0.55564	0.64336	0.08772
	-7.5	0.73382	0.56039	0.647105	0.086715
	-7.25	0.73325	0.55239	0.64282	0.09043
	-7	0.72881	0.562	0.645405	0.083405
	-6.75	0.73406	0.55479	0.644425	0.089635
	-6.5	0.73099	0.555	0.642995	0.087995
	-6.25	0.72503	0.55678	0.640905	0.084125
	-6	0.72735	0.55186	0.639605	0.087745
	-5.75	0.72861	0.54975	0.63918	0.08943
	-5.5	0.72518	0.55274	0.63896	0.08622
	-5.25	0.72685	0.54334	0.635095	0.091755
	-5	0.72467	0.54591	0.63529	0.08938
	-4.75	0.72738	0.55406	0.64072	0.08666
	-4.5	0.72152	0.55262	0.63707	0.08445
	-4.25	0.71952	0.54647	0.632995	0.086525
	-4	0.72086	0.54372	0.63229	0.08857
	-3.75	0.71764	0.54741	0.632525	0.085115
	-3.5	0.72318	0.54753	0.635355	0.087825
	-3.25	0.72128	0.5446	0.63294	0.08834
	-3	0.71499	0.5446	0.629795	0.085195
	-2.75	0.72307	0.54682	0.634945	0.088125
	-2.5	0.72366	0.54553	0.634595	0.089065
	-2.25	0.71895	0.54369	0.63132	0.08763
	-2	0.72128	0.54539	0.633335	0.087945
	-1.75	0.72223	0.54682	0.634525	0.087705
	-1.5	0.7169	0.54879	0.632845	0.084055
	-1.25	0.71374	0.54342	0.62858	0.08516
	-1	0.71443	0.54764	0.631035	0.083395
	-0.75	0.71592	0.54879	0.632355	0.083565
	-0.5	0.72366	0.54817	0.635915	0.087745
	-0.25	0.71344	0.55084	0.63214	0.0813
	0	0.72015	0.55379	0.63697	0.08318
	0.25	0.71994	0.55277	0.636355	0.083585
	0.5	0.71306	0.56062	0.63684	0.07622
	0.75	0.72086	0.56455	0.642705	0.078155
	1	0.72208	0.57093	0.646505	0.075575
	1.25	0.72485	0.58658	0.655715	0.069135
	1.5	0.72741	0.59417	0.66079	0.06662
	1.75	0.72947	0.60504	0.667255	0.062215
	2	0.73313	0.61974	0.676435	0.056695
	2.25	0.74365	0.64104	0.692345	0.051305
	2.5	0.74886	0.65458	0.70172	0.04714
	2.75	0.76224	0.67292	0.71758	0.04466
	3	0.78428	0.69457	0.739425	0.044855
	3.25	0.80195	0.71042	0.756185	0.045765
	3.5	0.82534	0.72439	0.774865	0.050475
	3.75	0.84783	0.74133	0.79458	0.05325
	4	0.87759	0.75193	0.81476	0.06283
	4.25	0.90264	0.77109	0.836865	0.065775
	4.5	0.92519	0.7829	0.854045	0.071145
	4.75	0.94968	0.7909	0.87029	0.07939
	5	0.97262	0.79453	0.883575	0.089045
	5.25	0.99627	0.80783	0.90205	0.09422
	5.5	1.01781	0.80734	0.912575	0.105235
	5.75	1.03682	0.81419	0.925505	0.111315
	6	1.04978	0.81366	0.93172	0.11806
	6.25	1.05889	0.81577	0.93733	0.12156
	6.5	1.07444	0.81659	0.945515	0.128925
	6.75	1.07882	0.82131	0.950065	0.128755
	7	1.08553	0.82055	0.95304	0.13249
	7.25	1.09008	0.82424	0.95716	0.13292
	7.5	1.09134	0.82497	0.958155	0.133185
	7.75	1.09533	0.8306	0.962965	0.132365
	8	1.09577	0.82811	0.96194	0.13383
	8.25	1.08636	0.82647	0.956415	0.129945
	8.5	1.09786	0.82685	0.962355	0.135505
	8.75	1.08985	0.8284	0.959125	0.130725
	9	1.09375	0.83077	0.96226	0.13149
	9.25	1.09181	0.82966	0.960735	0.131075
	9.5	1.09402	0.8352	0.96461	0.12941
	9.75	1.09598	0.84235	0.969165	0.126815
	10	1.10006	0.84202	0.97104	0.12902
	10.25	1.09574	0.8398	0.96777	0.12797
	10.5	1.10602	0.84554	0.97578	0.13024
	10.75	1.10459	0.84484	0.974715	0.129875
	11	1.10867	0.84999	0.97933	0.12934
	11.25	1.10605	0.84947	0.97776	0.12829
	11.5	1.10453	0.85307	0.9788	0.12573
	11.75	1.11469	0.85245	0.98357	0.13112
	12	1.1183	0.85442	0.98636	0.13194
	12.25	1.11597	0.86297	0.98947	0.1265
	12.5	1.12089	0.8693	0.995095	0.125795
	12.75	1.13006	0.86578	0.99792	0.13214
	13	1.12664	0.87238	0.99951	0.12713
	13.25	1.13408	0.87387	1.00398	0.130105
	13.5	1.13751	0.8741	1.00581	0.131705
	13.75	1.14439	0.87727	1.01083	0.13356
	14	1.14204	0.88418	1.01311	0.12893
	14.25	1.15288	0.88122	1.01705	0.13583
	14.5	1.15509	0.89025	1.02267	0.13242
	14.75	1.14749	0.89649	1.02199	0.1255
	15	1.15172	0.89388	1.0228	0.12892
	15.25	1.15598	0.89751	1.02675	0.129235
	15.5	1.1603	0.89573	1.02802	0.132285
	15.75	1.16516	0.90534	1.03525	0.12991
	16	1.17204	0.9109	1.04147	0.13057
	16.25	1.16915	0.90809	1.03862	0.13053
	16.5	1.17451	0.91014	1.04232	0.132185
	16.75	1.18151	0.91339	1.04745	0.13406
	17	1.18106	0.91738	1.04922	0.13184
	17.25	1.1897	0.91931	1.05451	0.135195
	17.5	1.1844	0.92458	1.05449	0.12991
	17.75	1.1906	0.91864	1.05462	0.13598
	18	1.1965	0.92265	1.05957	0.136925
	18.25	1.1942	0.92687	1.06054	0.133665
	18.5	1.1987	0.92904	1.06387	0.13483
	18.75	1.20755	0.93619	1.07187	0.13568
	19	1.19992	0.93179	1.06585	0.134065
	19.25	1.2119	0.9346	1.07325	0.13865
	19.5	1.21169	0.93953	1.07561	0.13608
	19.75	1.21491	0.94137	1.07814	0.13677
	20	1.21812	0.93906	1.07859	0.13953
	20.25	1.21726	0.94322	1.08024	0.13702
	20.5	1.22	0.94984	1.08492	0.13508
	20.75	1.22182	0.94316	1.08249	0.13933
	21	1.22378	0.95209	1.08794	0.135845
	21.25	1.22554	0.95218	1.08886	0.13668
	21.5	1.23281	0.94723	1.09002	0.14279
	21.75	1.23001	0.95286	1.09144	0.138575
	22	1.23421	0.94893	1.09157	0.14264
	22.25	1.23192	0.95382	1.09287	0.13905
	22.5	1.2399	0.95004	1.09497	0.14493
	22.75	1.23576	0.95444	1.0951	0.14066
	23	1.2346	0.95368	1.09414	0.14046
	23.25	1.23996	0.95558	1.09777	0.14219
	23.5	1.23478	0.94996	1.09237	0.14241
	23.75	1.23591	0.95646	1.09618	0.139725
	24	1.23862	0.95371	1.09617	0.142455
	24.25	1.2433	0.95289	1.0981	0.145205
	24.5	1.24345	0.95655	1.1	0.14345
	24.75	1.24747	0.95795	1.10271	0.14476
	25	1.24869	0.95382	1.10126	0.147435
	25.25	1.25444	0.95763	1.10603	0.148405
	25.5	1.25962	0.96261	1.11111	0.148505
	25.75	1.25766	0.96106	1.10936	0.1483
	26	1.25352	0.96285	1.10818	0.145335
	26.25	1.25149	0.96642	1.10895	0.142535
	26.5	1.25569	0.95883	1.10726	0.14843
	26.75	1.24979	0.95684	1.10332	0.146475
	27	1.24961	0.95839	1.104	0.14561
	27.25	1.25441	0.95804	1.10623	0.148185
	27.5	1.26394	0.96053	1.11224	0.151705
	27.75	1.2643	0.96619	1.11525	0.149055
	28	1.26198	0.96551	1.11374	0.148235
	28.25	1.25822	0.96484	1.11153	0.14669
	28.5	1.2693	0.97128	1.12029	0.14901
	28.75	1.25912	0.97322	1.11617	0.14295
	29	1.2657	0.97468	1.12019	0.14551
	29.25	1.26078	0.97852	1.11965	0.14113
	29.5	1.26305	0.97755	1.1203	0.14275
	29.75	1.26034	0.98075	1.12054	0.139795
	30	1.26257	0.97462	1.1186	0.143975
	30.25	1.26659	0.9789	1.12275	0.143845
	30.5	1.26659	0.97791	1.12225	0.14434
	30.75	1.25846	0.98022	1.11934	0.13912
	31	1.2556	0.97612	1.11586	0.13974
	31.25	1.26439	0.97861	1.1215	0.14289
	31.5	1.2646	0.98151	1.12305	0.141545
	31.75	1.26105	0.97744	1.11925	0.141805
	32	1.26385	0.98254	1.12319	0.140655
	32.25	1.26677	0.97829	1.12253	0.14424
	32.5	1.26302	0.98069	1.12186	0.141165
	32.75	1.27011	0.9816	1.12586	0.144255
	33	1.27443	0.98227	1.12835	0.14608
	33.25	1.27103	0.98204	1.12654	0.144495
	33.5	1.2663	0.98456	1.12543	0.14087
	33.75	1.27282	0.98119	1.12701	0.145815
	34	1.27056	0.98734	1.12895	0.14161
	34.25	1.27243	0.9806	1.12651	0.145915
	34.5	1.27091	0.97796	1.12444	0.146475
	34.75	1.27321	0.9864	1.1298	0.143405
	35	1.2741	0.98195	1.12803	0.146075
	35.25	1.27699	0.98245	1.12972	0.14727
	35.5	1.27654	0.98462	1.13058	0.14596
	35.75	1.2747	0.98793	1.13131	0.143385
	36	1.28369	0.99004	1.13687	0.146825
	36.25	1.27925	0.99417	1.13671	0.14254
	36.5	1.2817	0.99633	1.13902	0.142685
	36.75	1.28617	0.99367	1.13992	0.14625
	37	1.29194	0.9951	1.14352	0.14842
	37.25	1.28307	0.99071	1.13689	0.14618
	37.5	1.28205	0.99077	1.13641	0.14564
	37.75	1.28816	0.99367	1.14092	0.147245
	38	1.28786	0.9978	1.14283	0.14503
	38.25	1.28819	0.99346	1.14082	0.147365
	38.5	1.28602	0.99502	1.14052	0.1455
	38.75	1.28599	0.99604	1.14101	0.144975
	39	1.28351	0.99264	1.13807	0.145435
	39.25	1.28664	1.00369	1.14516	0.141475
	39.5	1.28768	0.99739	1.14254	0.145145
	39.75	1.28819	0.99004	1.13911	0.149075
	40	1.28718	0.99727	1.14223	0.144955
	40.25	1.28995	1.00111	1.14553	0.14442
	40.5	1.29123	1.0009	1.14607	0.145165
	40.75	1.28557	0.99654	1.14106	0.144515
	41	1.28989	0.99713	1.14351	0.14638
	41.25	1.29334	0.99909	1.14621	0.147125
	41.5	1.29093	0.9973	1.14411	0.146815
	41.75	1.29442	1.00225	1.14833	0.146085
	42	1.28661	0.99967	1.14314	0.14347
	42.25	1.28718	1.00252	1.14485	0.14233
	42.5	1.29504	1.00216	1.1486	0.14644
	42.75	1.29254	1.00451	1.14853	0.144015
	43	1.28959	1.00574	1.14766	0.141925
	43.25	1.29296	1.00817	1.15057	0.142395
	43.5	1.29284	1.00764	1.15024	0.1426
	43.75	1.29784	1.0109	1.15437	0.14347
	44	1.29385	1.01315	1.1535	0.14035
	44.25	1.29156	1.01649	1.15402	0.137535
	44.5	1.29317	1.01403	1.1536	0.13957
	44.75	1.2923	1.01684	1.15457	0.13773
	45	1.296	1.02124	1.15862	0.13738
	45.25	1.29147	1.02036	1.15591	0.135555
	45.5	1.29385	1.03014	1.162	0.131855
	45.75	1.29838	1.02818	1.16328	0.1351
	46	1.29314	1.03934	1.16624	0.1269
	46.25	1.29784	1.05048	1.17416	0.12368
	46.5	1.29585	1.0641	1.17997	0.115875
	46.75	1.30067	1.07131	1.18599	0.11468
	47	1.30505	1.08382	1.19443	0.110615
	47.25	1.32489	1.09501	1.20995	0.11494
	47.5	1.3279	1.10175	1.21483	0.113075
	47.75	1.34771	1.11446	1.23108	0.116625
	48	1.35695	1.11915	1.23805	0.1189
	48.25	1.37521	1.12346	1.24933	0.125875
	48.5	1.38745	1.12741	1.25743	0.13002
	48.75	1.40095	1.12258	1.26177	0.139185
	49	1.41209	1.1195	1.2658	0.146295
	49.25	1.41769	1.1202	1.26894	0.148745
	49.5	1.42624	1.11842	1.27233	0.15391
	49.75	1.42696	1.11584	1.2714	0.15556
	50	1.42463	1.11364	1.26913	0.155495
	50.25	1.41355	1.10564	1.2596	0.153955
	50.5	1.40846	1.10324	1.25585	0.15261
	50.75	1.40691	1.09237	1.24964	0.15727
	51	1.40533	1.08722	1.24628	0.159055
	51.25	1.39356	1.08197	1.23777	0.155795
	51.5	1.38727	1.07755	1.23241	0.15486
	51.75	1.38486	1.07224	1.22855	0.15631
	52	1.37107	1.06225	1.21666	0.15441
	52.25	1.36472	1.05985	1.21229	0.152435
	52.5	1.35501	1.0549	1.20495	0.150055
	52.75	1.35245	1.05118	1.20181	0.150635
	53	1.34435	1.04031	1.19233	0.15202
	53.25	1.3349	1.03633	1.18561	0.149285
	53.5	1.3274	1.02414	1.17577	0.15163
	53.75	1.31646	1.02355	1.17	0.146455
	54	1.3047	1.01965	1.16217	0.142525
	54.25	1.30219	1.01063	1.15641	0.14578
	54.5	1.29263	1.00627	1.14945	0.14318
	54.75	1.28599	0.99393	1.13996	0.14603
	55	1.2749	0.99446	1.13468	0.14022
	55.25	1.26632	0.98661	1.12647	0.139855
	55.5	1.25542	0.985	1.12021	0.13521
	55.75	1.2461	0.97796	1.11203	0.13407
	56	1.23942	0.96894	1.10418	0.13524
	56.25	1.22676	0.96264	1.0947	0.13206
	56.5	1.22036	0.95312	1.08674	0.13362
	56.75	1.21854	0.94416	1.08135	0.13719
	57	1.20585	0.93513	1.07049	0.13536
	57.25	1.20239	0.93803	1.07021	0.13218
	57.5	1.19411	0.92757	1.06084	0.13327
	57.75	1.19301	0.92848	1.06074	0.132265
	58	1.18541	0.92268	1.05404	0.131365
	58.25	1.17427	0.92001	1.04714	0.12713
	58.5	1.16811	0.91046	1.03929	0.128825
	58.75	1.15705	0.90621	1.03163	0.12542
	59	1.15077	0.90065	1.02571	0.12506
	59.25	1.14073	0.89177	1.01625	0.12448
	59.5	1.13733	0.8913	1.01431	0.123015
	59.75	1.13096	0.88843	1.0097	0.121265
	60	1.12982	0.8836	1.00671	0.12311
	60.25	1.12816	0.88032	1.00424	0.12392
	60.5	1.11755	0.87534	0.996445	0.121105
	60.75	1.10775	0.86792	0.987835	0.119915
	61	1.10748	0.86681	0.987145	0.120335
	61.25	1.10483	0.85899	0.98191	0.12292
	61.5	1.09503	0.86581	0.98042	0.11461
	61.75	1.09238	0.85574	0.97406	0.11832
	62	1.08839	0.86362	0.976005	0.112385
	62.25	1.08377	0.85808	0.970925	0.112845
	62.5	1.07856	0.84941	0.963985	0.114575
	62.75	1.07215	0.85342	0.962785	0.109365
	63	1.07379	0.8507	0.962245	0.111545
	63.25	1.07114	0.84979	0.960465	0.110675
	63.5	1.06732	0.84867	0.957995	0.109325
	63.75	1.06384	0.83561	0.949725	0.114115
	64	1.05362	0.83268	0.94315	0.11047
	64.25	1.04668	0.83675	0.941715	0.104965
	64.5	1.04617	0.82779	0.93698	0.10919
	64.75	1.04406	0.82697	0.935515	0.108545
	65	1.03038	0.8163	0.92334	0.10704
	65.25	1.0339	0.81208	0.92299	0.11091
	65.5	1.02895	0.81164	0.920295	0.108655
	65.75	1.02696	0.81736	0.92216	0.1048
	66	1.02377	0.81577	0.91977	0.104
	66.25	1.01829	0.8156	0.916945	0.101345
	66.5	1.01638	0.81287	0.914625	0.101755
	66.75	1.01144	0.80994	0.91069	0.10075
	67	1.00718	0.81024	0.90871	0.09847
	67.25	1.00557	0.81639	0.91098	0.09459
	67.5	1.00637	0.80912	0.907745	0.098625
	67.75	1.00658	0.81208	0.90933	0.09725
	68	0.99928	0.80693	0.903105	0.096175
	68.25	0.99353	0.80195	0.89774	0.09579
	68.5	0.98737	0.79477	0.89107	0.0963
	68.75	0.9862	0.78604	0.88612	0.10008
	69	0.98248	0.78747	0.884975	0.097505
	69.25	0.98162	0.79362	0.88762	0.094
	69.5	0.98382	0.79037	0.887095	0.096725
	69.75	0.97608	0.78853	0.882305	0.093775
	70	0.97554	0.78577	0.880655	0.094885
	70.25	0.97524	0.78662	0.88093	0.09431
	70.5	0.97277	0.78838	0.880575	0.092195
	70.75	0.97628	0.78387	0.880075	0.096205
	71	0.96502	0.7827	0.87386	0.09116
	71.25	0.96529	0.78299	0.87414	0.09115
	71.5	0.96178	0.77798	0.86988	0.0919
	71.75	0.96115	0.78208	0.871615	0.089535
	72	0.95823	0.77274	0.865485	0.092745
	72.25	0.96526	0.78129	0.873275	0.091985
	72.5	0.9638	0.7841	0.87395	0.08985
	72.75	0.95659	0.7742	0.865395	0.091195
	73	0.95338	0.77194	0.86266	0.09072
	73.25	0.95215	0.76787	0.86001	0.09214
	73.5	0.94682	0.76608	0.85645	0.09037
	73.75	0.94932	0.76324	0.85628	0.09304
	74	0.94643	0.76732	0.856875	0.089555
	74.25	0.94772	0.76737	0.857545	0.090175
	74.5	0.9445	0.77071	0.857605	0.086895
	74.75	0.94194	0.77194	0.85694	0.085
	75	0.94789	0.77057	0.85923	0.08866
	75.25	0.94611	0.7706	0.858355	0.087755
	75.5	0.93943	0.76324	0.851335	0.088095
	75.75	0.9361	0.76901	0.852555	0.083545
	76	0.94435	0.76983	0.85709	0.08726
	76.25	0.93642	0.77511	0.855765	0.080655
	76.5	0.93824	0.77124	0.85474	0.0835
	76.75	0.93714	0.76357	0.850355	0.086785
	77	0.9305	0.76154	0.84602	0.08448
	77.25	0.92796	0.75999	0.843975	0.083985
	77.5	0.93172	0.75996	0.84584	0.08588
	77.75	0.92847	0.76304	0.845755	0.082715
	78	0.92823	0.75941	0.84382	0.08441
	78.25	0.92361	0.75287	0.83824	0.08537
	78.5	0.92138	0.7546	0.83799	0.08339
	78.75	0.9268	0.7563	0.84155	0.08525
	79	0.9285	0.76386	0.84618	0.08232
	79.25	0.93041	0.75776	0.844085	0.086325
	79.5	0.93106	0.76342	0.84724	0.08382
	79.75	0.93163	0.76233	0.84698	0.08465
	80	0.9237	0.74974	0.83672	0.08698
	80.25	0.91542	0.74994	0.83268	0.08274
	80.5	0.91658	0.75076	0.83367	0.08291
	80.75	0.92835	0.75293	0.84064	0.08771
	81	0.92615	0.76107	0.84361	0.08254
	81.25	0.92904	0.76345	0.846245	0.082795
	81.5	0.91584	0.76078	0.83831	0.07753
	81.75	0.91691	0.7556	0.836255	0.080655
	82	0.91834	0.75797	0.838155	0.080185
	82.25	0.91909	0.75768	0.838385	0.080705
	82.5	0.91941	0.7592	0.839305	0.080105
	82.75	0.92686	0.75815	0.842505	0.084355
	83	0.92347	0.75791	0.84069	0.08278
	83.25	0.92361	0.76251	0.84306	0.08055
	83.5	0.92043	0.74836	0.834395	0.086035
	83.75	0.91935	0.75293	0.83614	0.08321
	84	0.91962	0.75413	0.836875	0.082745
	84.25	0.92883	0.75882	0.843825	0.085005
	84.5	0.92501	0.75325	0.83913	0.08588
	84.75	0.92227	0.7517	0.836985	0.085285
	85	0.92075	0.75451	0.83763	0.08312
	85.25	0.91876	0.76049	0.839625	0.079135
	85.5	0.91655	0.75861	0.83758	0.07897
	85.75	0.92525	0.7621	0.843675	0.081575
	86	0.92418	0.76459	0.844385	0.079795
	86.25	0.91021	0.75779	0.834	0.07621
	86.5	0.91763	0.75636	0.836995	0.080635
	86.75	0.91795	0.75111	0.83453	0.08342
	87	0.91241	0.75117	0.83179	0.08062
	87.25	0.90696	0.74438	0.82567	0.08129
	87.5	0.90797	0.74795	0.82796	0.08001
	87.75	0.90696	0.75026	0.82861	0.07835
	88	0.90336	0.75357	0.828465	0.074895
	88.25	0.90383	0.74906	0.826445	0.077385
	88.5	0.905	0.74496	0.82498	0.08002
	88.75	0.90815	0.74593	0.82704	0.08111
	89	0.91492	0.75428	0.8346	0.08032
	89.25	0.90979	0.75627	0.83303	0.07676
	89.5	0.91349	0.75668	0.835085	0.078405
	89.75	0.91584	0.75609	0.835965	0.079875
	90	0.90675	0.7585	0.832625	0.074125
	90.25	0.90291	0.7536	0.828255	0.074655
	90.5	0.90199	0.75771	0.82985	0.07214
	90.75	0.90351	0.75674	0.830125	0.073385
	91	0.89448	0.75607	0.825275	0.069205
	91.25	0.90386	0.75516	0.82951	0.07435
	91.5	0.90208	0.7556	0.82884	0.07324
	91.75	0.89522	0.7522	0.82371	0.07151
	92	0.89713	0.74851	0.82282	0.07431
	92.25	0.89192	0.74473	0.818325	0.073595
	92.5	0.89799	0.74241	0.8202	0.07779
	92.75	0.89156	0.74493	0.818245	0.073315
	93	0.90017	0.74068	0.820425	0.079745
	93.25	0.89999	0.74098	0.820485	0.079505
	93.5	0.89692	0.7367	0.81681	0.08011
	93.75	0.90062	0.74628	0.82345	0.07717
	94	0.90029	0.75208	0.826185	0.074105
	94.25	0.90035	0.75067	0.82551	0.07484
	94.5	0.89951	0.74971	0.82461	0.0749
	94.75	0.90243	0.74801	0.82522	0.07721
	95	0.90273	0.7517	0.827215	0.075515
	95.25	0.90955	0.74637	0.82796	0.08159
	95.5	0.90389	0.74628	0.825085	0.078805
	95.75	0.91632	0.75404	0.83518	0.08114
	96	0.90714	0.74027	0.823705	0.083435
	96.25	0.9038	0.72911	0.816455	0.087345
	96.5	0.90619	0.73131	0.81875	0.08744
	96.75	0.90592	0.72407	0.814995	0.090925
	97	0.90243	0.71364	0.808035	0.094395
	97.25	0.91128	0.73377	0.822525	0.088755
	97.5	0.91101	0.74476	0.827885	0.083125
	97.75	0.91188	0.73916	0.82552	0.08636
	98	0.90479	0.71689	0.81084	0.09395
	98.25	0.90652	0.68713	0.796825	0.109695
	98.5	0.9016	0.67166	0.78663	0.11497
	98.75	0.89764	0.67412	0.78588	0.11176
	99	0.89516	0.68391	0.789535	0.105625
	99.25	0.89528	0.68897	0.792125	0.103155
	99.5	0.89022	0.69422	0.79222	0.098
	99.75	0.88033	0.69357	0.78695	0.09338
	100	0.87562	0.69756	0.78659	0.08903
	100.25	0.86886	0.6825	0.77568	0.09318
	100.5	0.86296	0.68226	0.77261	0.09035
	100.75	0.86055	0.6842	0.772375	0.088175
	101	0.86442	0.68071	0.772565	0.091855
	101.25	0.86105	0.68311	0.77208	0.08897
	101.5	0.86028	0.6844	0.77234	0.08794
	101.75	0.86931	0.68194	0.775625	0.093685
	102	0.86016	0.68391	0.772035	0.088125
	102.25	0.85855	0.68692	0.772735	0.085815
	102.5	0.85766	0.68455	0.771105	0.086555
	102.75	0.8511	0.68139	0.766245	0.084855
	103	0.86079	0.68642	0.773605	0.087185
	103.25	0.85635	0.67887	0.76761	0.08874
	103.5	0.85885	0.6827	0.770775	0.088075
	103.75	0.85623	0.68332	0.769775	0.086455
	104	0.85867	0.67371	0.76619	0.09248
	104.25	0.84953	0.67186	0.760695	0.088835
	104.5	0.86022	0.67374	0.76698	0.09324
	104.75	0.85328	0.67995	0.766615	0.086665
	105	0.85105	0.67474	0.762895	0.088155
	105.25	0.84816	0.67684	0.7625	0.08566
	105.5	0.84881	0.66961	0.75921	0.0896
	105.75	0.84875	0.67333	0.76104	0.08771
	106	0.84702	0.67805	0.762535	0.084485
	106.25	0.83889	0.66715	0.75302	0.08587
	106.5	0.83749	0.66392	0.750705	0.086785
	106.75	0.83645	0.66779	0.75212	0.08433
	107	0.83809	0.66706	0.752575	0.085515
	107.25	0.83406	0.66738	0.75072	0.08334
	107.5	0.82706	0.66732	0.74719	0.07987
	107.75	0.82712	0.66469	0.745905	0.081215
	108	0.82358	0.65877	0.741175	0.082405
	108.25	0.81589	0.65121	0.73355	0.08234
	108.5	0.81559	0.65771	0.73665	0.07894
	108.75	0.82843	0.645	0.736715	0.091715
	109	0.82495	0.64265	0.7338	0.09115
	109.25	0.82295	0.64822	0.735585	0.087365
	109.5	0.81479	0.64661	0.7307	0.08409
	109.75	0.82826	0.64034	0.7343	0.09396
	110	0.82307	0.63416	0.728615	0.094455
	110.25	0.82659	0.64125	0.73392	0.09267
	110.5	0.8228	0.63999	0.731395	0.091405
	110.75	0.81574	0.63876	0.72725	0.08849
	111	0.81571	0.636	0.725855	0.089855
	111.25	0.82548	0.63908	0.73228	0.0932
	111.5	0.82286	0.64107	0.731965	0.090895
	111.75	0.82787	0.652	0.739935	0.087935
	112	0.83585	0.64594	0.740895	0.094955
	112.25	0.82879	0.65681	0.7428	0.08599
	112.5	0.82239	0.64828	0.735335	0.087055
	112.75	0.82262	0.64623	0.734425	0.088195
	113	0.81974	0.64421	0.731975	0.087765
	113.25	0.82763	0.64362	0.735625	0.092005
	113.5	0.82995	0.6392	0.734575	0.095375
	113.75	0.82957	0.64198	0.735775	0.093795
	114	0.83034	0.63055	0.730445	0.099895
	114.25	0.82221	0.63164	0.726925	0.095285
	114.5	0.82686	0.63638	0.73162	0.09524
	114.75	0.82408	0.63852	0.7313	0.09278
	115	0.83052	0.63609	0.733305	0.097215
	115.25	0.82742	0.63732	0.73237	0.09505
	115.5	0.82986	0.64172	0.73579	0.09407
	115.75	0.83314	0.64005	0.736595	0.096545
	116	0.84431	0.64268	0.743495	0.100815
	116.25	0.84574	0.64107	0.743405	0.102335
	116.5	0.84041	0.63618	0.738295	0.102115
	116.75	0.84318	0.63225	0.737715	0.105465
	117	0.85128	0.63899	0.745135	0.106145
	117.25	0.85289	0.63773	0.74531	0.10758
	117.5	0.84741	0.64388	0.745645	0.101765
	117.75	0.85149	0.63521	0.74335	0.10814
	118	0.85557	0.63893	0.74725	0.10832
	118.25	0.85688	0.63987	0.748375	0.108505
	118.5	0.86615	0.64263	0.75439	0.11176
	118.75	0.87232	0.64052	0.75642	0.1159
	119	0.88682	0.64128	0.76405	0.12277
	119.25	0.88268	0.64687	0.764775	0.117905
	119.5	0.88855	0.64453	0.76654	0.12201
	119.75	0.89433	0.65396	0.774145	0.120185
	120	0.90845	0.65584	0.782145	0.126305
	120.25	0.9167	0.65338	0.78504	0.13166
	120.5	0.91021	0.65232	0.781265	0.128945
	120.75	0.90666	0.6629	0.78478	0.12188
	121	0.91971	0.67307	0.79639	0.12332
	121.25	0.92829	0.66955	0.79892	0.12937
	121.5	0.92725	0.66741	0.79733	0.12992
	121.75	0.9212	0.67673	0.798965	0.122235
	122	0.93184	0.67822	0.80503	0.12681
	122.25	0.92835	0.68136	0.804855	0.123495
	122.5	0.93065	0.67784	0.804245	0.126405
	122.75	0.94048	0.68704	0.81376	0.12672
	123	0.93342	0.68812	0.81077	0.12265
	123.25	0.92874	0.68396	0.80635	0.12239
	123.5	0.94268	0.68877	0.815725	0.126955
	123.75	0.94509	0.68259	0.81384	0.13125
	124	0.94947	0.68373	0.8166	0.13287
	124.25	0.95046	0.68648	0.81847	0.13199
	124.5	0.95603	0.68675	0.82139	0.13464
	124.75	0.96336	0.69164	0.8275	0.13586
	125	0.96559	0.69589	0.83074	0.13485
	125.25	0.96407	0.69097	0.82752	0.13655
	125.5	0.96851	0.68883	0.82867	0.13984
	125.75	0.97459	0.69138	0.832985	0.141605
	126	0.9874	0.69548	0.84144	0.14596
	126.25	0.98978	0.70043	0.845105	0.144675
	126.5	0.99958	0.69381	0.846695	0.152885
	126.75	1.00363	0.69533	0.84948	0.15415
	127	1.01081	0.69976	0.855285	0.155525
	127.25	1.01498	0.69876	0.85687	0.15811
	127.5	1.02026	0.69269	0.856475	0.163785
	127.75	1.03271	0.68927	0.86099	0.17172
	128	1.03631	0.69413	0.86522	0.17109
	128.25	1.03685	0.70172	0.869285	0.167565
	128.5	1.04453	0.70198	0.873255	0.171275
	128.75	1.05088	0.70113	0.876005	0.174875
	129	1.05365	0.70389	0.87877	0.17488
	129.25	1.06125	0.70412	0.882685	0.178565
	129.5	1.07674	0.70102	0.88888	0.18786
	129.75	1.08237	0.70834	0.895355	0.187015
	130	1.08463	0.70811	0.89637	0.18826
	130.25	1.08749	0.70901	0.89825	0.18924
	130.5	1.0975	0.71701	0.907255	0.190245
	130.75	1.10108	0.71968	0.91038	0.1907
	131	1.10608	0.72413	0.915105	0.190975
	131.25	1.11502	0.72492	0.91997	0.19505
	131.5	1.12056	0.72841	0.924485	0.196075
	131.75	1.12312	0.72905	0.926085	0.197035
	132	1.13408	0.71853	0.926305	0.207775
	132.25	1.13796	0.72586	0.93191	0.20605
	132.5	1.14541	0.72979	0.9376	0.20781
	132.75	1.14332	0.72782	0.93557	0.20775
	133	1.14198	0.73617	0.939075	0.202905
	133.25	1.14365	0.7413	0.942475	0.201175
	133.5	1.14716	0.74531	0.946235	0.200925
	133.75	1.1583	0.75659	0.957445	0.200855
	134	1.16203	0.77016	0.966095	0.195935
	134.25	1.16069	0.77549	0.96809	0.1926
	134.5	1.15973	0.78073	0.97023	0.1895
	134.75	1.16081	0.78393	0.97237	0.18844
	135	1.1614	0.79275	0.977075	0.184325
	135.25	1.17043	0.80361	0.98702	0.18341
	135.5	1.16596	0.80326	0.98461	0.18135
	135.75	1.17543	0.81469	0.99506	0.18037
	136	1.18196	0.8236	1.00278	0.17918
	136.25	1.17829	0.83713	1.00771	0.17058
	136.5	1.18127	0.84094	1.01111	0.170165
	136.75	1.18652	0.85544	1.02098	0.16554
	137	1.18589	0.86227	1.02408	0.16181
	137.25	1.17746	0.88043	1.02894	0.148515
	137.5	1.18455	0.88547	1.03501	0.14954
	137.75	1.18521	0.89215	1.03868	0.14653
	138	1.18562	0.89874	1.04218	0.14344
	138.25	1.1987	0.91058	1.05464	0.14406
	138.5	1.19915	0.91316	1.05615	0.142995
	138.75	1.19939	0.91246	1.05593	0.143465
	139	1.19569	0.91111	1.0534	0.14229
	139.25	1.19545	0.91875	1.0571	0.13835
	139.5	1.19364	0.91834	1.05599	0.13765
	139.75	1.19968	0.91521	1.05744	0.142235
	140	1.19405	0.92584	1.05994	0.134105
	140.25	1.19822	0.93188	1.06505	0.13317
	140.5	1.20463	0.93645	1.07054	0.13409
	140.75	1.22021	0.94562	1.08292	0.137295
	141	1.21556	0.95359	1.08458	0.130985
	141.25	1.22101	0.95672	1.08886	0.132145
	141.5	1.21687	0.96894	1.09291	0.123965
	141.75	1.2186	0.96926	1.09393	0.12467
	142	1.21544	0.96997	1.09271	0.122735
	142.25	1.21291	0.96191	1.08741	0.1255
	142.5	1.2141	0.9678	1.09095	0.12315
	142.75	1.22069	0.96513	1.09291	0.12778
	143	1.21711	0.97111	1.09411	0.123
	143.25	1.22682	0.98456	1.10569	0.12113
	143.5	1.22164	0.98089	1.10127	0.120375
	143.75	1.2183	0.98262	1.10046	0.11784
	144	1.23195	0.97837	1.10516	0.12679
	144.25	1.23275	0.98051	1.10663	0.12612
	144.5	1.23061	0.98479	1.1077	0.12291
	144.75	1.2284	0.99141	1.1099	0.118495
	145	1.22417	0.99493	1.10955	0.11462
	145.25	1.21684	0.9966	1.10672	0.11012
	145.5	1.22203	0.99299	1.10751	0.11452
	145.75	1.23093	0.99499	1.11296	0.11797
	146	1.23126	0.99607	1.11367	0.117595
	146.25	1.23245	0.9927	1.11258	0.119875
	146.5	1.23388	1.00351	1.11869	0.115185
	146.75	1.23263	0.99543	1.11403	0.1186
	147	1.23168	0.99191	1.1118	0.119885
	147.25	1.2315	0.99589	1.1137	0.117805
	147.5	1.24038	0.992	1.11619	0.12419
	147.75	1.24118	1.00032	1.12075	0.12043
	148	1.24297	1	1.12148	0.121485
	148.25	1.24008	1.00149	1.12079	0.119295
	148.5	1.24261	0.99718	1.1199	0.122715
	148.75	1.24184	1.0014	1.12162	0.12022
	149	1.24208	1.0046	1.12334	0.11874
	149.25	1.23356	1.01025	1.1219	0.111655
	149.5	1.23007	0.99507	1.11257	0.1175
	149.75	1.22596	0.99733	1.11164	0.114315
	150	1.23302	0.99636	1.11469	0.11833
	150.25	1.23516	1.00249	1.11883	0.116335
	150.5	1.23361	0.99964	1.11662	0.116985
	150.75	1.23945	1.00958	1.12451	0.114935
	151	1.24449	1.01043	1.12746	0.11703
	151.25	1.23165	1.0106	1.12112	0.110525
	151.5	1.24208	1.00181	1.12195	0.120135
	151.75	1.23737	0.99484	1.11611	0.121265
	152	1.23987	1.0012	1.12054	0.119335
	152.25	1.24205	1.00067	1.12136	0.12069
	152.5	1.23746	1.00052	1.11899	0.11847
	152.75	1.23642	0.99458	1.1155	0.12092
	153	1.24339	0.99191	1.11765	0.12574
	153.25	1.2497	0.99206	1.12088	0.12882
	153.5	1.24511	0.99601	1.12056	0.12455
	153.75	1.24485	0.99118	1.11801	0.126835
	154	1.23773	0.99672	1.11722	0.120505
	154.25	1.2343	1.00149	1.11789	0.116405
	154.5	1.23913	0.99701	1.11807	0.12106
	154.75	1.23901	1.00512	1.12207	0.116945
	155	1.24991	1.00527	1.12759	0.12232
	155.25	1.25724	1.00234	1.12979	0.12745
	155.5	1.25006	1.0123	1.13118	0.11888
	155.75	1.24264	1.00386	1.12325	0.11939
	156	1.24595	1.00673	1.12634	0.11961
	156.25	1.24327	1.00545	1.12436	0.11891
	156.5	1.23966	1.00158	1.12062	0.11904
	156.75	1.23224	0.99601	1.11413	0.118115
	157	1.23528	0.99355	1.11441	0.120865
	157.25	1.24863	1.00234	1.12548	0.123145
	157.5	1.24878	0.99469	1.12173	0.127045
	157.75	1.24222	1.00369	1.12296	0.119265
	158	1.23847	1.00161	1.12004	0.11843
	158.25	1.23174	0.9966	1.11417	0.11757
	158.5	1.23653	0.99651	1.11652	0.12001
	158.75	1.24065	0.99358	1.11712	0.123535
	159	1.24511	0.99466	1.11989	0.125225
	159.25	1.24282	0.99461	1.11871	0.124105
	159.5	1.24309	0.99718	1.12013	0.122955
	159.75	1.24005	0.99841	1.11923	0.12082
	160	1.24535	0.99493	1.12014	0.12521
	160.25	1.24809	0.99704	1.12257	0.125525
	160.5	1.24377	0.99683	1.1203	0.12347
	160.75	1.2472	0.99666	1.12193	0.12527
	161	1.24368	0.99666	1.12017	0.12351
	161.25	1.24148	0.98822	1.11485	0.12663
	161.5	1.24928	0.99701	1.12315	0.126135
	161.75	1.24035	0.98971	1.11503	0.12532
	162	1.24091	0.99727	1.11909	0.12182
	162.25	1.24637	0.99692	1.12165	0.124725
	162.5	1.24997	0.98971	1.11984	0.13013
	162.75	1.24893	0.99707	1.123	0.12593
	163	1.25021	0.99548	1.12285	0.127365
	163.25	1.24422	1.00079	1.12251	0.121715
	163.5	1.24365	0.99651	1.12008	0.12357
	163.75	1.24556	0.99926	1.12241	0.12315
	164	1.24777	1.00293	1.12535	0.12242
	164.25	1.24428	1.00143	1.12285	0.121425
	164.5	1.23883	0.99783	1.11833	0.1205
	164.75	1.24485	1.00067	1.12276	0.12209
	165	1.25086	1.00709	1.12898	0.121885
	165.25	1.24911	1.00808	1.1286	0.120515
	165.5	1.24631	0.99771	1.12201	0.1243
	165.75	1.24044	0.99165	1.11604	0.124395
	166	1.24252	1.00577	1.12414	0.118375
	166.25	1.24139	1.00823	1.12481	0.11658
	166.5	1.24208	1.00881	1.12545	0.116635
	166.75	1.24073	1.0046	1.12267	0.118065
	167	1.23785	1.00073	1.11929	0.11856
	167.25	1.24428	1.00389	1.12409	0.120195
	167.5	1.2377	0.99982	1.11876	0.11894
	167.75	1.24374	0.99792	1.12083	0.12291
	168	1.24735	0.99718	1.12227	0.125085
	168.25	1.23621	1.00129	1.11875	0.11746
	168.5	1.23689	0.99821	1.11755	0.11934
	168.75	1.24425	0.99979	1.12202	0.12223
	169	1.24532	1.00096	1.12314	0.12218
	169.25	1.24389	1.01277	1.12833	0.11556
	169.5	1.24175	1.00589	1.12382	0.11793
	169.75	1.24592	1.00744	1.12668	0.11924
	170	1.24872	1.00826	1.12849	0.12023
	170.25	1.24133	1.0145	1.12792	0.113415
	170.5	1.24464	1.01166	1.12815	0.11649
	170.75	1.24231	1.00158	1.12194	0.120365
	171	1.24076	0.99818	1.11947	0.12129
	171.25	1.25289	1.00345	1.12817	0.12472
	171.5	1.24589	1.00348	1.12468	0.121205
	171.75	1.24771	1.00331	1.12551	0.1222
	172	1.24517	1.01186	1.12852	0.116655
	172.25	1.24619	1.00756	1.12688	0.119315
	172.5	1.25232	1.00788	1.1301	0.12222
	172.75	1.25369	1.00694	1.13031	0.123375
	173	1.25652	1.00794	1.13223	0.12429
	173.25	1.25676	1.00105	1.12891	0.127855
	173.5	1.2517	1.00723	1.12947	0.122235
	173.75	1.25146	1.00764	1.12955	0.12191
	174	1.2497	1.00506	1.12738	0.12232
	174.25	1.25402	0.9968	1.12541	0.12861
	174.5	1.25194	0.99774	1.12484	0.1271
	174.75	1.25128	0.99074	1.12101	0.13027
	175	1.24398	0.97588	1.10993	0.13405
	175.25	1.24714	0.95948	1.10331	0.14383
	175.5	1.23624	0.93302	1.08463	0.15161
	175.75	1.23144	0.90601	1.06873	0.162715
	176	1.22387	0.87466	1.04927	0.174605
	176.25	1.21976	0.84059	1.03017	0.189585
	176.5	1.1979	0.79896	0.99843	0.19947
	176.75	1.1855	0.75126	0.96838	0.21712
	177	1.15604	0.70576	0.9309	0.22514
	177.25	1.12548	0.65379	0.889635	0.235845
	177.5	1.07027	0.60313	0.8367	0.23357
	177.75	1.01525	0.54152	0.778385	0.236865
	178	0.95665	0.49432	0.725485	0.231165
	178.25	0.89108	0.44548	0.66828	0.2228
	178.5	0.82069	0.39421	0.60745	0.21324
	178.75	0.74913	0.35281	0.55097	0.19816
	179	0.67445	0.31136	0.492905	0.181545
	179.25	0.59967	0.27318	0.436425	0.163245
	179.5	0.53702	0.23814	0.38758	0.14944
	179.75	0.4711	0.20978	0.34044	0.13066
	180	0.40365	0.18409	0.29387	0.10978
	180.25	0.33817	0.15262	0.245395	0.092775
	180.5	0.29843	0.12646	0.212445	0.085985
	180.75	0.24895	0.11345	0.1812	0.06775
	181	0.20742	0.09737	0.152395	0.055025
	181.25	0.17802	0.08562	0.13182	0.0462
	181.5	0.14766	0.07815	0.112905	0.034755
	181.75	0.12013	0.06708	0.093605	0.026525
	182	0.10357	0.05462	0.079095	0.024475
	182.25	0.08212	0	0.04106	0.04106
	182.5	0.06735	0	0.033675	0.033675
	182.75	0.05522	0	0.02761	0.02761
	183	0.03833	0	0.019165	0.019165
	183.25	0.03195	0	0.015975	0.015975
	183.5	0.03288	0	0.01644	0.01644
	183.75	0.02537	0	0.012685	0.012685
	184	0.01566	0	0.00783	0.00783
	184.25	0.00806	0	0.00403	0.00403
	184.5	0.01381	0	0.006905	0.006905
	184.75	0.00979	0	0.004895	0.004895
	185	0.00589	0	0.002945	0.002945
	185.25	-0.00198	0	-0.00099	0.00099
	185.5	-0.0057	0	-0.00285	0.00285
	185.75	0.0033	0	0.00165	0.00165
	186	-0.00207	0	-0.001035	0.001035
	186.25	-0.00081	0	-0.000405	0.000405
	186.5	-0.013	0	-0.0065	0.0065
	186.75	-0.00731	0	-0.003655	0.003655
	187	0.00166	0	0.00083	0.00083
	187.25	-0.00609	0	-0.003045	0.003045
	187.5	-0.00198	0	-0.00099	0.00099
	187.75	-0.00362	0	-0.00181	0.00181
	188	-0.00633	0	-0.003165	0.003165
	188.25	-0.00335	0	-0.001675	0.001675
	188.5	-0.00788	0	-0.00394	0.00394
	188.75	-0.00847	0	-0.004235	0.004235
	189	-0.01333	0	-0.006665	0.006665
	189.25	-0.00665	0	-0.003325	0.003325
	189.5	-0.0085	0	-0.00425	0.00425
	189.75	-0.00412	0	-0.00206	0.00206
	190	-0.00079	0	-0.000395	0.000395
	190.25	-0.00966	0	-0.00483	0.00483
	190.5	-0.01145	0	-0.005725	0.005725
	190.75	-0.00561	0	-0.002805	0.002805
	191	-0.00081	0	-0.000405	0.000405
	191.25	-0.00162	0	-0.00081	0.00081
	191.5	-0.0046	0	-0.0023	0.0023
	191.75	-0.00951	0	-0.004755	0.004755
	192	-0.00451	0	-0.002255	0.002255
	192.25	-0.0124	0	-0.0062	0.0062
	192.5	-0.00406	0	-0.00203	0.00203
	192.75	-0.00957	0	-0.004785	0.004785
	193	-0.01273	0	-0.006365	0.006365
	193.25	-0.00689	0	-0.003445	0.003445
	193.5	-0.01234	0	-0.00617	0.00617
	193.75	-0.01276	0	-0.00638	0.00638
	194	-0.0099	0	-0.00495	0.00495
	194.25	-0.00549	0	-0.002745	0.002745
	194.5	-0.00993	0	-0.004965	0.004965
	194.75	-0.01491	0	-0.007455	0.007455
	195	-0.01666	0	-0.00833	0.00833
	195.25	-0.01142	0	-0.00571	0.00571
	195.5	-0.01318	0	-0.00659	0.00659
	195.75	-0.00996	0	-0.00498	0.00498
	196	-0.00841	0	-0.004205	0.004205
	196.25	-0.00409	0	-0.002045	0.002045
	196.5	-0.00019	0	-9.5e-05	9.5e-05
	196.75	-0.0124	0	-0.0062	0.0062
	197	-0.00734	0	-0.00367	0.00367
	197.25	-0.00576	0	-0.00288	0.00288
	197.5	-0.0077	0	-0.00385	0.00385
	197.75	-0.00936	0	-0.00468	0.00468
	198	-0.01282	0	-0.00641	0.00641
	198.25	-0.01276	0	-0.00638	0.00638
	198.5	-0.01502	0	-0.00751	0.00751
	198.75	-0.01729	0	-0.008645	0.008645
	199	-0.02584	0	-0.01292	0.01292
	199.25	-0.02155	0	-0.010775	0.010775
	199.5	-0.02301	0	-0.011505	0.011505
	199.75	-0.02101	0	-0.010505	0.010505
	200	-0.02932	0	-0.01466	0.01466
	200.25	-0.03755	0	-0.018775	0.018775
	200.5	-0.03749	0	-0.018745	0.018745
	200.75	-0.02965	-0.00084	-0.015245	0.014405
		-8.46472	-0.00084	-4.23278	4.23194
		-8.46472	-0.00084	-4.23278	4.23194
		-8.46472	-0.00084	-4.23278	4.23194
		-8.46472	-0.00084	-4.23278	4.23194
		-8.46472	-0.00084	-4.23278	4.23194
		-8.46472	-0.00084	-4.23278	4.23194
		-8.46472	-0.00084	-4.23278	4.23194
		-8.46472	-0.00084	-4.23278	4.23194
		-8.46472	-0.00084	-4.23278	4.23194
		-8.46472	-0.00084	-4.23278	4.23194
		-8.46472	-0.00084	-4.23278	4.23194
		-8.46472	-0.00084	-4.23278	4.23194
		-8.46472	-0.00084	-4.23278	4.23194
		-8.46472	-0.00084	-4.23278	4.23194
		-8.46472	-0.00084	-4.23278	4.23194
		-8.46472	-0.00084	-4.23278	4.23194
		-8.46472	-0.00084	-4.23278	4.23194
		-8.46472	-0.00084	-4.23278	4.23194
		-8.46472	-0.00084	-4.23278	4.23194
		-8.46472	-0.00084	-4.23278	4.23194
		-8.46472	-0.00084	-4.23278	4.23194
		-8.46472	-0.00084	-4.23278	4.23194
		-8.46472	-0.00084	-4.23278	4.23194
		-8.46472	-0.00084	-4.23278	4.23194
		-8.46472	-0.00084	-4.23278	4.23194
		-8.46472	-0.00084	-4.23278	4.23194
		-8.46472	-0.00084	-4.23278	4.23194
		-8.46472	-0.00084	-4.23278	4.23194
		-8.46472	-0.00084	-4.23278	4.23194
		-8.46472	-0.00084	-4.23278	4.23194
		-8.46472	-0.00084	-4.23278	4.23194
		-8.46472	-0.00084	-4.23278	4.23194
		-8.46472	-0.00084	-4.23278	4.23194
		-8.46472	-0.00084	-4.23278	4.23194
		-8.46472	-0.00084	-4.23278	4.23194
		-8.46472	-0.00084	-4.23278	4.23194
		-8.46472	-0.00084	-4.23278	4.23194
		-8.46472	-0.00084	-4.23278	4.23194
		-8.46472	-0.00084	-4.23278	4.23194
		-8.46472	-0.00084	-4.23278	4.23194
		-8.46472	-0.00084	-4.23278	4.23194
		-8.46472	-0.00084	-4.23278	4.23194
		-8.46472	-0.00084	-4.23278	4.23194
		-8.46472	-0.00084	-4.23278	4.23194
		-8.46472	-0.00084	-4.23278	4.23194
		-8.46472	-0.00084	-4.23278	4.23194
		-8.46472	-0.00084	-4.23278	4.23194
		-8.46472	-0.00084	-4.23278	4.23194
		-8.46472	-0.00084	-4.23278	4.23194
		-8.46472	-0.00084	-4.23278	4.23194
		-8.46472	-0.00084	-4.23278	4.23194
		-8.46472	-0.00084	-4.23278	4.23194
		-8.46472	-0.00084	-4.23278	4.23194
		-8.46472	-0.00084	-4.23278	4.23194
		-8.46472	-0.00084	-4.23278	4.23194
		-8.46472	-0.00084	-4.23278	4.23194
		-8.46472	-0.00084	-4.23278	4.23194
		-8.46472	-0.00084	-4.23278	4.23194
		-8.46472	-0.00084	-4.23278	4.23194
		-8.46472	-0.00084	-4.23278	4.23194
		-8.46472	-0.00084	-4.23278	4.23194
		-8.46472	-0.00084	-4.23278	4.23194
		-8.46472	-0.00084	-4.23278	4.23194
		-8.46472	-0.00084	-4.23278	4.23194
		-8.46472	-0.00084	-4.23278	4.23194
		-8.46472	-0.00084	-4.23278	4.23194
		-8.46472	-0.00084	-4.23278	4.23194
		-8.46472	-0.00084	-4.23278	4.23194
		-8.46472	-0.00084	-4.23278	4.23194
		-8.46472	-0.00084	-4.23278	4.23194
		-8.46472	-0.00084	-4.23278	4.23194
		-8.46472	-0.00084	-4.23278	4.23194
		-8.46472	-0.00084	-4.23278	4.23194
		-8.46472	-0.00084	-4.23278	4.23194
		-8.46472	-0.00084	-4.23278	4.23194
		-8.46472	-0.00084	-4.23278	4.23194
		-8.46472	-0.00084	-4.23278	4.23194
		-8.46472	-0.00084	-4.23278	4.23194
		-8.46472	-0.00084	-4.23278	4.23194
		-8.46472	-0.00084	-4.23278	4.23194
		-8.46472	-0.00084	-4.23278	4.23194
		-8.46472	-0.00084	-4.23278	4.23194
		-8.46472	-0.00084	-4.23278	4.23194
		-8.46472	-0.00084	-4.23278	4.23194
		-8.46472	-0.00084	-4.23278	4.23194
		-8.46472	-0.00084	-4.23278	4.23194
		-8.46472	-0.00084	-4.23278	4.23194
		-8.46472	-0.00084	-4.23278	4.23194
		-8.46472	-0.00084	-4.23278	4.23194
		-8.46472	-0.00084	-4.23278	4.23194
		-8.46472	-0.00084	-4.23278	4.23194
		-8.46472	-0.00084	-4.23278	4.23194
		-8.46472	-0.00084	-4.23278	4.23194
		-8.46472	-0.00084	-4.23278	4.23194
		-8.46472	-0.00084	-4.23278	4.23194
		-8.46472	-0.00084	-4.23278	4.23194
		-8.46472	-0.00084	-4.23278	4.23194
		-8.46472	-0.00084	-4.23278	4.23194
		-8.46472	-0.00084	-4.23278	4.23194
		-8.46472	-0.00084	-4.23278	4.23194
		-8.46472	-0.00084	-4.23278	4.23194
		-8.46472	-0.00084	-4.23278	4.23194
		-8.46472	-0.00084	-4.23278	4.23194
		-8.46472	-0.00084	-4.23278	4.23194
		-8.46472	-0.00084	-4.23278	4.23194
		-8.46472	-0.00084	-4.23278	4.23194
		-8.46472	-0.00084	-4.23278	4.23194
		-8.46472	-0.00084	-4.23278	4.23194
		-8.46472	-0.00084	-4.23278	4.23194
		-8.46472	-0.00084	-4.23278	4.23194
		-8.46472	-0.00084	-4.23278	4.23194
		-8.46472	-0.00084	-4.23278	4.23194
		-8.46472	-0.00084	-4.23278	4.23194
		-8.46472	-0.00084	-4.23278	4.23194
		-8.46472	-0.00084	-4.23278	4.23194
		-8.46472	-0.00084	-4.23278	4.23194
		-8.46472	-0.00084	-4.23278	4.23194
		-8.46472	-0.00084	-4.23278	4.23194
		-8.46472	-0.00084	-4.23278	4.23194
		-8.46472	-0.00084	-4.23278	4.23194
		-8.46472	-0.00084	-4.23278	4.23194
		-8.46472	-0.00084	-4.23278	4.23194
		-8.46472	-0.00084	-4.23278	4.23194
		-8.46472	-0.00084	-4.23278	4.23194
		-8.46472	-0.00084	-4.23278	4.23194
		-8.46472	-0.00084	-4.23278	4.23194
		-8.46472	-0.00084	-4.23278	4.23194
		-8.46472	-0.00084	-4.23278	4.23194
		-8.46472	-0.00084	-4.23278	4.23194
		-8.46472	-0.00084	-4.23278	4.23194
		-8.46472	-0.00084	-4.23278	4.23194
		-8.46472	-0.00084	-4.23278	4.23194
		-8.46472	-0.00084	-4.23278	4.23194
		-8.46472	-0.00084	-4.23278	4.23194
		-8.46472	-0.00084	-4.23278	4.23194
		-8.46472	-0.00084	-4.23278	4.23194
		-8.46472	-0.00084	-4.23278	4.23194
		-8.46472	-0.00084	-4.23278	4.23194
		-8.46472	-0.00084	-4.23278	4.23194
		-8.46472	-0.00084	-4.23278	4.23194
		-8.46472	-0.00084	-4.23278	4.23194
		-8.46472	-0.00084	-4.23278	4.23194
		-8.46472	-0.00084	-4.23278	4.23194
		-8.46472	-0.00084	-4.23278	4.23194
		-8.46472	-0.00084	-4.23278	4.23194
		-8.46472	-0.00084	-4.23278	4.23194
		-8.46472	-0.00084	-4.23278	4.23194
		-8.46472	-0.00084	-4.23278	4.23194
		-8.46472	-0.00084	-4.23278	4.23194
		-8.46472	-0.00084	-4.23278	4.23194
		-8.46472	-0.00084	-4.23278	4.23194
		-8.46472	-0.00084	-4.23278	4.23194
		-8.46472	-0.00084	-4.23278	4.23194
		-8.46472	-0.00084	-4.23278	4.23194
		-8.46472	-0.00084	-4.23278	4.23194
		-8.46472	-0.00084	-4.23278	4.23194
		-8.46472	-0.00084	-4.23278	4.23194
		-8.46472	-0.00084	-4.23278	4.23194
		-8.46472	-0.00084	-4.23278	4.23194
		-8.46472	-0.00084	-4.23278	4.23194
		-8.46472	-0.00084	-4.23278	4.23194
		-8.46472	-0.00084	-4.23278	4.23194
		-8.46472	-0.00084	-4.23278	4.23194
		-8.46472	-0.00084	-4.23278	4.23194
		-8.46472	-0.00084	-4.23278	4.23194
		-8.46472	-0.00084	-4.23278	4.23194
		-8.46472	-0.00084	-4.23278	4.23194
		-8.46472	-0.00084	-4.23278	4.23194
		-8.46472	-0.00084	-4.23278	4.23194
		-8.46472	-0.00084	-4.23278	4.23194
		-8.46472	-0.00084	-4.23278	4.23194
		-8.46472	-0.00084	-4.23278	4.23194
		-8.46472	-0.00084	-4.23278	4.23194
		-8.46472	-0.00084	-4.23278	4.23194
		-8.46472	-0.00084	-4.23278	4.23194
		-8.46472	-0.00084	-4.23278	4.23194
		-8.46472	-0.00084	-4.23278	4.23194
		-8.46472	-0.00084	-4.23278	4.23194
		-8.46472	-0.00084	-4.23278	4.23194
		-8.46472	-0.00084	-4.23278	4.23194
		-8.46472	-0.00084	-4.23278	4.23194
		-8.46472	-0.00084	-4.23278	4.23194
		-8.46472	-0.00084	-4.23278	4.23194
		-8.46472	-0.00084	-4.23278	4.23194
		-8.46472	-0.00084	-4.23278	4.23194
		-8.46472	-0.00084	-4.23278	4.23194
		-8.46472	-0.00084	-4.23278	4.23194
		-8.46472	-0.00084	-4.23278	4.23194
		-8.46472	-0.00084	-4.23278	4.23194
		-8.46472	-0.00084	-4.23278	4.23194
		-8.46472	-0.00084	-4.23278	4.23194
		-8.46472	-0.00084	-4.23278	4.23194
		-8.46472	-0.00084	-4.23278	4.23194
		-8.46472	-0.00084	-4.23278	4.23194
		-8.46472	-0.00084	-4.23278	4.23194
		-8.46472	-0.00084	-4.23278	4.23194
