# Supplementary material for: Fluidics system for resolving concentration-dependent effects of dissolved gases on tissue metabolism
Source: eLife. 2021 Nov 4;10:e66716. doi: 10.7554/eLife.66716 (PMC8660022; doi:10.7554/eLife.66716)
Supplement: Figure 4—source data 1. [file elife-66716-fig4-data1.xlsx]

## Sheet: Fig 4A
			nmol O2/mL			mm Hg
			Inflow	Outflow		Inflow	Outflow
		-67.75	227.337	177.383		148.764	116.075
		-67.5	223.596	177.216		146.316	115.967
		-67.25	223.474	179.039		146.236	117.159
		-67	223.706	177.563		146.388	116.193
		-66.75	224.405	177.978		146.845	116.465
		-66.5	224.034	178.3		146.603	116.675
		-66.25	224.408	177.669		146.847	116.263
		-66	223.942	178.392		146.543	116.736
		-65.75	223.844	177.094		146.478	115.886
		-65.5	224.807	177.407		147.109	116.091
		-65.25	224.497	177.722		146.906	116.298
		-65	224.758	177.279		147.077	116.007
		-64.75	224.135	178.169		146.669	116.59
		-64.5	224.555	177.693		146.944	116.279
		-64.25	225.355	177.214		147.467	115.965
		-64	223.893	177.619		146.51	116.23
		-63.75	224.242	177.573		146.739	116.2
		-63.5	224.592	178.249		146.968	116.642
		-63.25	223.963	178.522		146.557	116.821
		-63	224.405	178.048		146.845	116.511
		-62.75	223.022	177.848		145.941	116.38
		-62.5	224.224	177.787		146.727	116.34
		-62.25	224.168	177.664		146.691	116.26
		-62	223.703	178.215		146.386	116.62
		-61.75	224.813	177.717		147.113	116.294
		-61.5	224.095	177.879		146.643	116.4
		-61.25	223.804	177.848		146.452	116.38
		-61	223.217	177.616		146.068	116.228
		-60.75	224.58	178.099		146.96	116.544
		-60.5	224.141	178.109		146.673	116.55
		-60.25	223.804	177.13		146.452	115.91
		-60	223.945	177.224		146.545	115.971
		-59.75	223.917	177.935		146.526	116.436
		-59.5	223.138	178.099		146.016	116.544
		-59.25	224.26	177.498		146.751	116.151
		-59	223.828	178.442		146.468	116.769
		-58.75	223.104	177.628		145.994	116.236
		-58.5	224.129	177.58		146.665	116.204
		-58.25	224.049	178.794		146.613	116.999
		-58	223.816	177.952		146.46	116.448
		-57.75	223.571	178.005		146.3	116.482
		-57.5	223.743	178.113		146.412	116.553
		-57.25	223.92	178.334		146.528	116.698
		-57	224.693	177.58		147.034	116.204
		-56.75	223.654	179.538		146.354	117.486
		-56.5	223.896	178.312		146.512	116.683
		-56.25	224.092	176.928		146.641	115.778
		-56	222.958	177.696		145.899	116.28
		-55.75	223.929	177.216		146.534	115.967
		-55.5	223.917	176.923		146.526	115.775
		-55.25	223.761	177.686		146.424	116.274
		-55	223.089	177.616		145.984	116.228
		-54.75	224.116	177.161		146.657	115.93
		-54.5	223.62	178.167		146.332	116.588
		-54.25	223.483	176.667		146.242	115.607
		-54	223.538	177.279		146.278	116.007
		-53.75	223.611	176.693		146.326	115.624
		-53.5	222.07	177.58		145.317	116.204
		-53.25	223.936	177.626		146.538	116.234
		-53	223.599	177.491		146.318	116.146
		-52.75	223.957	178.034		146.553	116.501
		-52.5	222.918	177.024		145.873	115.841
		-52.25	224.092	178.116		146.641	116.555
		-52	223.361	178.52		146.162	116.82
		-51.75	223.562	177.467		146.294	116.13
		-51.5	223.461	177.599		146.228	116.217
		-51.25	222.675	177.607		145.713	116.222
		-51	223.309	177.392		146.128	116.081
		-50.75	223.559	176.827		146.292	115.712
		-50.5	223.899	177.626		146.514	116.234
		-50.25	222.891	177.836		145.855	116.372
		-50	223.749	177.739		146.416	116.309
		-49.75	222.528	178.935		145.618	117.091
		-49.5	222.738	178.039		145.755	116.504
		-49.25	222.705	177.522		145.733	116.167
		-49	222.656	177.45		145.701	116.119
		-48.75	223.605	177.522		146.322	116.167
		-48.5	221.884	178.222		145.196	116.625
		-48.25	222.656	178.695		145.701	116.934
		-48	222.659	178.068		145.703	116.523
		-47.75	223.355	179.353		146.158	117.365
		-47.5	221.721	177.279		145.089	116.007
		-47.25	224.141	178.535		146.673	116.829
		-47	222.745	178.37		145.759	116.721
		-46.75	223.706	178.104		146.388	116.547
		-46.5	223.19	176.59		146.05	115.557
		-46.25	222.109	177.809		145.343	116.354
		-46	222.395	176.899		145.53	115.759
		-45.75	223.068	177.787		145.971	116.34
		-45.5	222.471	177.298		145.58	116.02
		-45.25	223.254	177.226		146.092	115.973
		-45	222.492	177.949		145.594	116.446
		-44.75	223.498	177.611		146.252	116.225
		-44.5	223.333	177.99		146.144	116.473
		-44.25	223.098	176.674		145.99	115.611
		-44	223.297	178.162		146.12	116.585
		-43.75	221.975	177.363		145.256	116.063
		-43.5	224.07	177.106		146.627	115.894
		-43.25	222.483	177.715		145.588	116.293
		-43	221.903	177.051		145.208	115.858
		-42.75	223.691	178.573		146.378	116.854
		-42.5	223.001	177.756		145.927	116.32
		-42.25	223.046	176.931		145.957	115.779
		-42	222.784	177.549		145.785	116.184
		-41.75	222.07	177.293		145.317	116.017
		-41.5	223.095	177.623		145.988	116.233
		-41.25	222.894	176.133		145.857	115.257
		-41	222.483	177.12		145.588	115.904
		-40.75	223.196	177.537		146.054	116.176
		-40.5	223.101	177.534		145.992	116.174
		-40.25	222.246	177.551		145.433	116.186
		-40	222.635	178.019		145.687	116.492
		-39.75	223.513	177.479		146.262	116.138
		-39.5	223.575	178.513		146.302	116.815
		-39.25	223.455	176.969		146.224	115.805
		-39	222.927	178.041		145.879	116.506
		-38.75	222.066	177.739		145.315	116.309
		-38.5	221.666	178.488		145.053	116.799
		-38.25	222.781	177.229		145.783	115.974
		-38	222.921	175.856		145.875	115.076
		-37.75	222.215	177.927		145.413	116.432
		-37.5	222.218	177.534		145.415	116.174
		-37.25	223.679	177.409		146.37	116.093
		-37	221.657	177.373		145.047	116.069
		-36.75	221.5	176.408		144.944	115.437
		-36.5	222.541	177.799		145.626	116.348
		-36.25	222.821	176.979		145.809	115.811
		-36	222.711	176.652		145.737	115.597
		-35.75	221.975	177.978		145.256	116.465
		-35.5	222.577	176.683		145.65	115.618
		-35.25	223.257	176.681		146.094	115.616
		-35	222.815	177.358		145.805	116.059
		-34.75	222.854	177.556		145.831	116.189
		-34.5	222.559	177.732		145.638	116.304
		-34.25	222.486	177.713		145.59	116.291
		-34	222.468	176.813		145.578	115.702
		-33.75	221.709	177.185		145.081	115.946
		-33.5	223.596	176.919		146.316	115.772
		-33.25	221.93	177.091		145.226	115.885
		-33	221.985	178.44		145.262	116.767
		-32.75	222.319	178.104		145.48	116.547
		-32.5	222.638	177.411		145.689	116.094
		-32.25	222.431	177.12		145.554	115.904
		-32	222.72	177.334		145.743	116.044
		-31.75	221.827	178.077		145.159	116.53
		-31.5	221.903	177.221		145.208	115.97
		-31.25	222.145	177.635		145.367	116.241
		-31	221.878	177.096		145.192	115.888
		-30.75	222.34	177.012		145.494	115.833
		-30.5	222.501	177.103		145.6	115.893
		-30.25	221.978	177.672		145.258	116.264
		-30	221.487	177.385		144.936	116.077
		-29.75	222.465	178.106		145.576	116.549
		-29.5	221.9	176.14		145.206	115.262
		-29.25	221.061	176.858		144.657	115.732
		-29	222.507	176.899		145.604	115.759
		-28.75	221.421	177		144.893	115.825
		-28.5	221.942	178.121		145.234	116.558
		-28.25	221.627	177.2		145.028	115.956
		-28	222.431	177.332		145.554	116.042
		-27.75	222.535	177.556		145.622	116.189
		-27.5	222.401	176.998		145.534	115.823
		-27.25	222.589	177.566		145.658	116.195
		-27	221.185	177.664		144.738	116.26
		-26.75	222.07	177.334		145.317	116.044
		-26.5	221.59	176.818		145.004	115.706
		-26.25	222.395	177.828		145.53	116.367
		-26	221.019	176.415		144.63	115.442
		-25.75	222.258	177.522		145.441	116.167
		-25.5	221.721	177.672		145.089	116.264
		-25.25	221.918	176.243		145.218	115.329
		-25	222.13	178.353		145.357	116.71
		-24.75	221.36	176.631		144.853	115.583
		-24.5	221.518	177.079		144.956	115.877
		-24.25	221.496	177.872		144.942	116.395
		-24	222.489	177.894		145.592	116.41
		-23.75	221.106	178.222		144.687	116.625
		-23.5	221.818	176.981		145.153	115.812
		-23.25	222.775	177.607		145.779	116.222
		-23	221.136	177.693		144.707	116.279
		-22.75	221.557	177.918		144.982	116.425
		-22.5	221.248	176.621		144.78	115.577
		-22.25	222.076	177.26		145.321	115.995
		-22	222.416	177.727		145.544	116.301
		-21.75	222.334	176.763		145.49	115.669
		-21.5	221.266	178.317		144.792	116.686
		-21.25	221.981	177.144		145.26	115.919
		-21	221.9	177.448		145.206	116.118
		-20.75	221.357	177.342		144.851	116.048
		-20.5	220.837	175.758		144.511	115.012
		-20.25	221.612	177.053		145.018	115.86
		-20	221.827	176.914		145.159	115.768
		-19.75	220.913	176.671		144.561	115.61
		-19.5	220.581	176.698		144.343	115.627
		-19.25	221.188	177.144		144.74	115.919
		-19	221.17	176.667		144.729	115.607
		-18.75	220.678	176.446		144.406	115.462
		-18.5	220.723	177.73		144.436	116.302
		-18.25	221.418	176.971		144.891	115.806
		-18	220.889	177.236		144.545	115.979
		-17.75	221.155	176.501		144.719	115.499
		-17.5	221.388	177.496		144.871	116.149
		-17.25	221.354	177.594		144.849	116.214
		-17	220.051	177.78		143.997	116.335
		-16.75	220.424	177.664		144.241	116.26
		-16.5	221.909	176.887		145.212	115.751
		-16.25	221.097	176.688		144.681	115.621
		-16	220.786	176.895		144.478	115.756
		-15.75	221.988	177.472		145.264	116.133
		-15.5	221.016	176.979		144.628	115.811
		-15.25	221.83	176.209		145.161	115.307
		-15	221.706	175.954		145.079	115.14
		-14.75	221.14	177.556		144.709	116.189
		-14.5	220.88	176.334		144.539	115.389
		-14.25	221.89	177.219		145.2	115.968
		-14	220.726	176.659		144.438	115.602
		-13.75	221.472	177.635		144.927	116.241
		-13.5	220.466	176.587		144.268	115.555
		-13.25	220.928	177.684		144.57	116.272
		-13	221.043	177.003		144.646	115.827
		-12.75	220.301	176.171		144.16	115.282
		-12.5	220.925	176.998		144.568	115.823
		-12.25	221.466	177.337		144.923	116.045
		-12	220.693	177.173		144.416	115.938
		-11.75	220.928	176.89		144.57	115.753
		-11.5	219.94	176.379		143.924	115.419
		-11.25	220.795	176.449		144.483	115.464
		-11	220.997	177.152		144.616	115.924
		-10.75	221.294	176.638		144.81	115.588
		-10.5	221.004	175.806		144.62	115.043
		-10.25	220.753	176.238		144.456	115.326
		-10	221.372	176.441		144.861	115.459
		-9.75	221.049	176.81		144.649	115.701
		-9.5	221.191	176.602		144.742	115.564
		-9.25	220.524	176.873		144.306	115.742
		-9	221.191	176.981		144.742	115.812
		-8.75	221.975	177.474		145.256	116.135
		-8.5	221.5	175.956		144.944	115.142
		-8.25	220.705	177.281		144.424	116.009
		-8	221.004	176.882		144.62	115.748
		-7.75	221.421	175.963		144.893	115.146
		-7.5	220.973	176.65		144.6	115.596
		-7.25	220.108	176.923		144.034	115.775
		-7	220.804	177.428		144.489	116.105
		-6.75	220.539	176.326		144.316	115.384
		-6.5	221.17	176.609		144.729	115.569
		-6.25	220.825	176.887		144.503	115.751
		-6	220.78	176.496		144.474	115.495
		-5.75	220.967	176.341		144.596	115.394
		-5.5	220.659	176.82		144.395	115.707
		-5.25	221.085	176.212		144.673	115.309
		-5	221.306	177.101		144.818	115.891
		-4.75	220.078	177.144		144.014	115.919
		-4.5	220.132	175.977		144.05	115.156
		-4.25	221.019	175.865		144.63	115.082
		-4	221.094	176.13		144.679	115.256
		-3.75	219.495	175.999		143.633	115.17
		-3.5	220.054	177.592		143.999	116.212
		-3.25	220.789	175.88		144.48	115.092
		-3	221.43	176.331		144.899	115.387
		-2.75	220.563	176.291		144.331	115.361
		-2.5	220.708	176.914		144.426	115.768
		-2.25	219.952	176.839		143.932	115.72
		-2	221.055	175.942		144.653	115.132
		-1.75	219.769	177.058		143.812	115.863
		-1.5	221.121	176.698		144.697	115.627
		-1.25	220.711	177.346		144.428	116.052
		-1	219.321	176.652		143.519	115.597
		-0.75	218.723	177.132		143.127	115.911
		-0.5	216.851	177.942		141.903	116.441
		-0.25	214.803	177.048		140.562	115.856
		0	211.375	176.326		138.319	115.384
		0.25	205.643	176.818		134.568	115.706
		0.5	201.644	176.959		131.951	115.798
		0.75	195.442	175.436		127.893	114.802
		1	189.256	176.417		123.845	115.444
		1.25	182.609	176.528		119.495	115.516
		1.5	174.636	177.132		114.278	115.911
		1.75	168.423	176.489		110.212	115.491
		2	161.694	177.19		105.809	115.949
		2.25	154.36	176.549		101.01	115.53
		2.5	148.005	175.55		96.8513	114.876
		2.75	141.076	175.858		92.3171	115.078
		3	135.68	174.821		88.7857	114.399
		3.25	129.551	174.377		84.7754	114.109
		3.5	124.835	172.881		81.6895	113.13
		3.75	119.915	171.74		78.4695	112.383
		4	115.216	170.46		75.395	111.546
		4.25	110.866	169.011		72.5481	110.597
		4.5	107.013	167.805		70.0269	109.808
		4.75	102.825	165.841		67.2866	108.523
		5	99.6439	162.547		65.2047	106.367
		5.25	96.5224	161.224		63.1621	105.501
		5.5	93.3712	156.974		61.1001	102.72
		5.75	90.4063	154.015		59.1599	100.784
		6	87.8029	151.168		57.4563	98.9211
		6.25	85.4923	146.089		55.9442	95.5971
		6.5	82.7304	143.005		54.137	93.5794
		6.75	80.9674	138.402		52.9833	90.5675
		7	78.5218	134.575		51.3829	88.063
		7.25	76.7958	131.172		50.2535	85.836
		7.5	75.0233	126.182		49.0936	82.5709
		7.75	73.6038	122.819		48.1647	80.3698
		8	72.0545	118.448		47.1509	77.5099
		8.25	70.3364	114.668		46.0266	75.0359
		8.5	68.6549	110.406		44.9263	72.2471
		8.75	67.6932	106.487		44.2969	69.6829
		9	66.0291	102.962		43.208	67.3762
		9.25	64.7587	99.6636		42.3767	65.2177
		9.5	63.9728	96.7665		41.8624	63.3218
		9.75	62.7383	93.2404		41.0545	61.0144
		10	61.4392	90.0363		40.2044	58.9178
		10.25	60.5628	87.1821		39.631	57.05
		10.5	59.634	84.843		39.0232	55.5194
		10.75	58.9544	82.4149		38.5785	53.9305
		11	58.087	80.2376		38.0109	52.5057
		11.25	57.3506	77.3371		37.529	50.6077
		11.5	56.7652	75.1691		37.1459	49.189
		11.75	55.7292	72.4741		36.4679	47.4254
		12	54.8079	70.8949		35.8651	46.3921
		12.25	54.5222	68.666		35.6781	44.9335
		12.5	53.8116	66.9717		35.2131	43.8248
		12.75	53.0572	65.0295		34.7194	42.5538
		13	52.6234	63.0372		34.4356	41.2502
		13.25	52.1602	61.6239		34.1325	40.3253
		13.5	51.7964	60.5577		33.8944	39.6276
		13.75	51.1643	58.9031		33.4808	38.5449
		14	50.8307	57.1686		33.2625	37.4099
		14.25	49.9303	56.3939		32.6733	36.9029
		14.5	49.7674	55.3853		32.5667	36.2429
		14.75	48.9402	53.42		32.0254	34.9569
		15	48.6132	52.5173		31.8114	34.3661
		15.25	48.1499	51.6791		31.5082	33.8177
		15.5	48.0151	50.5488		31.42	33.078
		15.75	47.5381	49.4477		31.1079	32.3575
		16	47.0673	48.2871		30.7998	31.598
		16.25	46.6896	47.6428		30.5527	31.1764
		16.5	46.7262	46.7869		30.5766	30.6163
		16.75	45.7599	46.0471		29.9442	30.1322
		17	45.8519	45.0691		30.0045	29.4922
		17.25	45.2313	44.2372		29.5984	28.9479
		17.5	45.1738	43.8955		29.5607	28.7242
		17.75	44.8831	42.6282		29.3705	27.895
		18	44.7167	42.2943		29.2616	27.6764
		18.25	44.2689	41.6579		28.9686	27.26
		18.5	44.2803	40.9876		28.976	26.8214
		18.75	43.7588	40.4828		28.6348	26.491
		19	43.4275	39.8678		28.418	26.0886
		19.25	43.0844	39.4179		28.1935	25.7942
		19.5	43.1792	38.6414		28.2555	25.2861
		19.75	42.98	38.0519		28.1251	24.9003
		20	42.4986	38.0281		27.8102	24.8847
		20.25	42.35	37.3416		27.7129	24.4355
		20.5	42.114	36.928		27.5584	24.1649
		20.75	41.7584	36.5711		27.3258	23.9313
		21	41.6107	35.637		27.2291	23.3201
		21.25	41.3889	35.7026		27.084	23.363
		21.5	41.1744	34.7926		26.9436	22.7675
		21.75	41.0751	34.401		26.8787	22.5112
		22	40.7558	34.1338		26.6697	22.3364
		22.25	40.5434	33.752		26.5307	22.0865
		22.5	40.3986	33.6208		26.436	22.0007
		22.75	40.096	33.2344		26.238	21.7479
		23	39.9087	32.848		26.1154	21.495
		23.25	39.7523	32.2352		26.013	21.094
		23.5	39.5755	31.9221		25.8973	20.8891
		23.75	39.3158	31.7482		25.7274	20.7753
		24	39.1194	31.341		25.5988	20.5088
		24.25	39.0902	31.2143		25.5798	20.4259
		24.5	38.7133	30.7859		25.3331	20.1456
		24.75	38.7717	30.7237		25.3713	20.1049
		25	38.3172	30.1407		25.074	19.7234
		25.25	38.2964	30.2743		25.0603	19.8109
		25.5	38.2636	29.7094		25.0388	19.4412
		25.75	38.1422	29.7475		24.9594	19.4661
		26	37.9441	29.3788		24.8298	19.2248
		26.25	37.6138	28.9078		24.6137	18.9166
		26.5	37.7203	28.8643		24.6833	18.8882
		26.75	37.3163	28.5904		24.419	18.7089
		27	37.3753	28.1781		24.4576	18.4391
		27.25	37.0393	28.0785		24.2377	18.3739
		27.5	37.0247	27.8062		24.2282	18.1958
		27.75	36.6585	27.4153		23.9885	17.9399
		28	36.6016	27.3264		23.9513	17.8818
		28.25	36.461	27.0594		23.8593	17.7071
		28.5	36.3369	26.9579		23.778	17.6407
		28.75	36.2838	26.5893		23.7433	17.3995
		29	36.0153	26.4036		23.5676	17.2779
		29.25	36.1203	26.4825		23.6363	17.3296
		29.5	36.0329	26.3071		23.5791	17.2148
		29.75	35.7208	26.1124		23.3749	17.0873
		30	35.5583	25.6695		23.2686	16.7975
		30.25	35.6533	25.6247		23.3307	16.7682
		30.5	35.3434	25.2458		23.1279	16.5203
		30.75	35.2028	25.0995		23.036	16.4246
		31	35.1839	25.1561		23.0236	16.4616
		31.25	34.9625	24.825		22.8787	16.2449
		31.5	34.74	24.8369		22.7331	16.2527
		31.75	34.6838	24.4436		22.6963	15.9954
		32	34.7147	24.359		22.7165	15.94
		32.25	34.7147	24.3168		22.7165	15.9124
		32.5	34.33	24.0307		22.4648	15.7252
		32.75	34.2287	23.9394		22.3985	15.6654
		33	34.1358	23.755		22.3377	15.5448
		33.25	34.0311	23.6981		22.2692	15.5075
		33.5	34.139	23.1916		22.3398	15.1761
		33.75	33.957	23.4339		22.2207	15.3346
		34	33.984	23.0538		22.2384	15.0859
		34.25	33.6645	23.0502		22.0293	15.0835
		34.5	33.5385	22.8285		21.9468	14.9385
		34.75	33.4984	22.8747		21.9206	14.9687
		35	33.4332	22.3693		21.8779	14.638
		35.25	33.3585	22.569		21.8291	14.7687
		35.5	33.217	22.0761		21.7365	14.4461
		35.75	33.0532	22.1251		21.6293	14.4781
		36	32.7717	21.7211		21.4451	14.2138
		36.25	32.9708	21.9357		21.5754	14.3542
		36.5	32.7502	21.8432		21.431	14.2937
		36.75	33.0818	21.6916		21.648	14.1945
		37	33.0691	21.5511		21.6397	14.1026
		37.25	33.554	21.5157		21.957	14.0794
		37.5	33.6119	21.259		21.9949	13.9114
		37.75	33.8134	21.103		22.1268	13.8093
		38	34.3431	21.2971		22.4734	13.9363
		38.25	34.3039	21.088		22.4477	13.7995
		38.5	34.3617	20.7821		22.4855	13.5994
		38.75	34.5263	20.613		22.5932	13.4887
		39	34.9132	20.4338		22.8465	13.3715
		39.25	34.6184	20.3666		22.6535	13.3275
		39.5	34.7741	20.4928		22.7554	13.41
		39.75	34.8039	20.5023		22.7749	13.4163
		40	34.5553	20.0958		22.6123	13.1502
		40.25	34.5444	20.2272		22.6051	13.2362
		40.5	34.4054	20.2156		22.5141	13.2286
		40.75	34.2331	20.0398		22.4014	13.1136
		41	33.6328	20.0143		22.0086	13.0969
		41.25	33.3825	19.7687		21.8448	12.9362
		41.5	32.9049	19.6775		21.5322	12.8765
		41.75	32.7964	19.8684		21.4613	13.0015
		42	32.0326	19.7994		20.9614	12.9563
		42.25	31.9826	19.743		20.9287	12.9194
		42.5	31.6732	19.598		20.7262	12.8245
		42.75	31.2886	19.3717		20.4746	12.6764
		43	31.2285	19.4848		20.4352	12.7504
		43.25	30.9304	19.5441		20.2402	12.7893
		43.5	30.7358	19.4439		20.1128	12.7236
		43.75	30.6043	19.3485		20.0268	12.6613
		44	30.4361	19.1286		19.9167	12.5174
		44.25	30.5492	19.3015		19.9907	12.6305
		44.5	30.1909	19.0307		19.7562	12.4532
		44.75	30.0543	19.0834		19.6669	12.4878
		45	30.0539	19.0213		19.6666	12.4471
		45.25	30.0205	18.7787		19.6448	12.2884
		45.5	29.9257	18.6684		19.5827	12.2162
		45.75	29.7891	18.7191		19.4934	12.2493
		46	29.7337	18.5691		19.4571	12.1512
		46.25	29.5727	18.3201		19.3517	11.9883
		46.5	29.595	18.4144		19.3663	12.05
		46.75	29.2984	18.2592		19.1722	11.9484
		47	29.2955	18.0196		19.1703	11.7916
		47.25	29.2552	18.0226		19.144	11.7936
		47.5	29.2686	17.8841		19.1527	11.703
		47.75	29.1445	17.641		19.0715	11.5439
		48	29.0395	17.7481		19.0028	11.614
		48.25	28.9323	17.4816		18.9327	11.4396
		48.5	29.019	17.491		18.9894	11.4458
		48.75	28.8421	17.1846		18.8736	11.2452
		49	29.0118	17.269		18.9847	11.3004
		49.25	28.7208	17.3223		18.7943	11.3353
		49.5	28.726	17.0884		18.7977	11.1822
		49.75	28.6373	16.9992		18.7396	11.1239
		50	28.4528	16.9101		18.6189	11.0656
		50.25	28.6255	16.8707		18.7319	11.0398
		50.5	28.2712	16.7821		18.5001	10.9818
		50.75	28.5807	16.846		18.7026	11.0237
		51	28.3591	16.5517		18.5576	10.8311
		51.25	28.3189	16.5264		18.5312	10.8145
		51.5	28.1994	16.5836		18.453	10.852
		51.75	28.1281	16.3608		18.4064	10.7062
		52	28.1151	16.5005		18.3979	10.7975
		52.25	27.9727	16.3348		18.3047	10.6891
		52.5	27.9047	16.285		18.2602	10.6565
		52.75	27.9588	16.2603		18.2956	10.6404
		53	27.8719	16.1424		18.2388	10.5632
		53.25	27.8179	16.1141		18.2034	10.5447
		53.5	27.7769	16.1605		18.1766	10.5751
		53.75	27.724	16.0071		18.142	10.4747
		54	27.7162	15.9121		18.1369	10.4125
		54.25	27.7245	15.937		18.1423	10.4288
		54.5	27.5813	15.8375		18.0486	10.3637
		54.75	27.6102	15.7824		18.0675	10.3277
		55	27.4967	15.845		17.9932	10.3686
		55.25	27.504	15.8139		17.998	10.3482
		55.5	27.4501	15.6692		17.9628	10.2536
		55.75	27.3376	15.5165		17.8891	10.1537
		56	27.4123	15.6689		17.938	10.2534
		56.25	27.4917	15.3143		17.9899	10.0214
		56.5	27.2858	15.3129		17.8552	10.0204
		56.75	27.2096	15.4662		17.8054	10.1207
		57	27.1757	15.2294		17.7832	9.9658
		57.25	27.2418	15.4287		17.8264	10.0962
		57.5	27.1409	15.1894		17.7604	9.93963
		57.75	27.1052	15.2671		17.737	9.99047
		58	27.1535	15.3191		17.7687	10.0245
		58.25	27.0609	15.1551		17.7081	9.91717
		58.5	27.042	15.0355		17.6957	9.83892
		58.75	27.0722	15.1513		17.7154	9.91467
		59	26.894	15.0746		17.5988	9.8645
		59.25	26.8249	15.0536		17.5536	9.85075
		59.5	26.7569	15.0178		17.5091	9.82729
		59.75	26.6818	14.8885		17.46	9.74273
		60	26.7551	14.7047		17.5079	9.62243
		60.25	26.6119	14.8356		17.4142	9.70811
		60.5	26.5105	14.8229		17.3479	9.6998
		60.75	26.6168	14.7426		17.4174	9.64723
		61	26.7461	14.7481		17.5021	9.6508
		61.25	26.5874	14.5646		17.3982	9.53076
		61.5	26.5967	14.5729		17.4043	9.53617
		61.75	26.5843	14.5367		17.3962	9.5125
		62	26.4555	14.6034		17.3119	9.55614
		62.25	26.5447	14.6371		17.3703	9.5782
		62.5	26.4639	14.5381		17.3174	9.51344
		62.75	26.4028	14.539		17.2774	9.51399
		63	26.4174	14.5094		17.287	9.49464
		63.25	26.3851	14.5917		17.2658	9.54848
		63.5	26.1678	14.3933		17.1236	9.41864
		63.75	26.2787	14.4034		17.1962	9.4253
		64	26.421	14.402		17.2893	9.42437
		64.25	26.3608	14.4037		17.2499	9.42548
		64.5	26.0244	14.4026		17.0298	9.42474
		64.75	26.0844	14.3682		17.0691	9.4022
		65	26.2712	14.1201		17.1913	9.23985
		65.25	26.0608	14.2455		17.0536	9.32196
		65.5	26.0796	14.1468		17.0659	9.25736
		65.75	26.0603	14.2635		17.0533	9.33371
		66	25.9502	14.1047		16.9812	9.22983
		66.25	25.8308	14.1446		16.9031	9.2559
		66.5	26.0048	14.1153		17.0169	9.23675
		66.75	25.7951	14.0342		16.8798	9.18365
		67	25.8482	14.0628		16.9145	9.20235
		67.25	25.8103	14.0383		16.8897	9.18637
		67.5	25.8038	13.9948		16.8854	9.1579
		67.75	25.7222	14.0672		16.832	9.20526
		68	25.8095	13.9531		16.8891	9.13058
		68.25	25.6581	13.9567		16.7901	9.13293
		68.5	25.5721	13.816		16.7338	9.04089
		68.75	25.6849	13.7653		16.8077	9.00773
		69	25.7882	13.9625		16.8752	9.13673
		69.25	25.5208	13.8034		16.7002	9.03264
		69.5	25.4803	13.8863		16.6738	9.08691
		69.75	25.5023	13.7481		16.6881	8.99646
		70	25.601	13.7514		16.7528	8.99861
		70.25	25.3918	13.6383		16.6158	8.9246
		70.5	25.5523	13.6418		16.7208	8.92691
		70.75	25.1311	13.6359		16.4452	8.923
		71	25.3789	13.6851		16.6074	8.95522
		71.25	25.2001	13.5526		16.4904	8.86854
		71.5	25.3888	13.5607		16.6139	8.87385
		71.75	25.3836	13.6581		16.6105	8.93759
		72	25.2334	13.6892		16.5122	8.95789
		72.25	25.2847	13.5859		16.5457	8.89033
		72.5	25.0851	13.4725		16.4151	8.81608
		72.75	25.1119	13.5518		16.4327	8.86801
		73	25.1651	13.4757		16.4675	8.8182
		73.25	25.0303	13.4066		16.3793	8.77298
		73.5	24.9862	13.3078		16.3504	8.70834
		73.75	24.9866	13.2907		16.3507	8.69717
		74	25.0155	13.3964		16.3696	8.76631
		74.25	24.8019	13.2337		16.2298	8.65987
		74.5	24.6275	13.1158		16.1157	8.58269
		74.75	24.7788	13.1293		16.2147	8.59151
		75	24.6422	13.2322		16.1253	8.65883
		75.25	24.7392	13.1674		16.1888	8.61645
		75.5	24.6225	13.2359		16.1124	8.66126
		75.75	24.6602	13.2465		16.1371	8.66823
		76	24.7581	13.1905		16.2012	8.63154
		76.25	24.6242	13.2604		16.1135	8.67729
		76.5	24.5104	13.1438		16.0391	8.60103
		76.75	24.7434	13.0293		16.1915	8.52611
		77	24.5919	13.0596		16.0924	8.54592
		77.25	24.4483	13.0172		15.9984	8.5182
		77.5	24.5677	12.9511		16.0765	8.47494
		77.75	24.4875	12.9331		16.0241	8.46312
		78	24.6724	13.0362		16.1451	8.53058
		78.25	24.5455	12.8589		16.062	8.41461
		78.5	24.495	12.8251		16.029	8.39247
		78.75	24.5338	12.761		16.0544	8.35051
		79	24.4478	12.7649		15.9981	8.35306
		79.25	24.3896	12.739		15.96	8.33611
		79.5	24.3975	12.8002		15.9652	8.37614
		79.75	24.4303	12.5977		15.9867	8.24368
		80	24.2911	12.6121		15.8956	8.25309
		80.25	24.3817	12.6399		15.9548	8.27127
		80.5	24.2522	12.7266		15.8701	8.32799
		80.75	24.348	12.7369		15.9328	8.33476
		81	24.2257	12.5649		15.8528	8.2222
		81.25	24.2216	12.6705		15.85	8.29132
		81.5	24.1455	12.6039		15.8003	8.24771
		81.75	24.241	12.5975		15.8628	8.24351
		82	24.2978	12.5849		15.8999	8.23528
		82.25	24.2178	12.5608		15.8476	8.21951
		82.5	24.1947	12.4989		15.8325	8.17901
		82.75	24.1265	12.6711		15.7879	8.29166
		83	24.0141	12.5053		15.7143	8.18319
		83.25	24.0096	12.4999		15.7114	8.17968
		83.5	24.0804	12.4217		15.7577	8.1285
		83.75	24.0606	12.6211		15.7447	8.25898
		84	24.1802	12.477		15.823	8.16465
		84.25	24.1076	12.4923		15.7755	8.17467
		84.5	24.1579	12.5488		15.8084	8.21164
		84.75	23.8204	12.3431		15.5875	8.07706
		85	23.9575	12.4111		15.6772	8.12152
		85.25	23.9198	12.6288		15.6526	8.26403
		85.5	23.8526	12.3563		15.6086	8.08567
		85.75	23.84	12.4703		15.6003	8.16032
		86	24.0166	12.4095		15.7159	8.12052
		86.25	23.9198	12.2984		15.6526	8.04779
		86.5	23.9103	12.4724		15.6464	8.16165
		86.75	23.7388	12.3662		15.5341	8.09214
		87	23.8257	12.3358		15.591	8.07226
		87.25	23.8866	12.2412		15.6309	8.01036
		87.5	23.7404	12.2843		15.5352	8.03854
		87.75	23.8792	12.1334		15.626	7.9398
		88	23.6761	12.2533		15.4931	8.01826
		88.25	23.716	12.1426		15.5192	7.94585
		88.5	23.7249	12.1196		15.5251	7.9308
		88.75	23.6103	12.2507		15.4501	8.01662
		89	23.86	12.1684		15.6135	7.96272
		89.25	23.7751	12.1914		15.5579	7.97781
		89.5	23.7127	12.0677		15.5171	7.89686
		89.75	23.7225	12.2341		15.5235	8.00575
		90	23.4267	12.1106		15.3299	7.92492
		90.25	23.6262	12.0588		15.4604	7.89099
		90.5	23.4074	11.9464		15.3173	7.81745
		90.75	23.3261	11.9518		15.2641	7.82101
		91	23.3365	12.1451		15.2709	7.94749
		91.25	23.0724	12.0058		15.0981	7.85635
		91.5	22.9099	11.962		14.9917	7.82765
		91.75	22.5964	12.0511		14.7866	7.88594
		92	22.2162	11.9499		14.5378	7.81972
		92.25	21.9292	11.9934		14.35	7.84824
		92.5	21.641	11.957		14.1614	7.82441
		92.75	21.4334	11.9711		14.0256	7.83365
		93	21.3304	11.9756		13.9582	7.83656
		93.25	21.263	11.92		13.914	7.80015
		93.5	21.2315	11.8507		13.8935	7.75485
		93.75	21.3593	11.9042		13.9771	7.78982
		94	21.4139	11.9029		14.0128	7.78901
		94.25	21.5342	11.8419		14.0915	7.74906
		94.5	21.507	11.795		14.0737	7.71839
		94.75	21.547	11.6396		14.0999	7.61673
		95	21.7215	11.896		14.2141	7.7845
		95.25	21.8198	11.7894		14.2784	7.71471
		95.5	21.886	11.5679		14.3217	7.56981
		95.75	21.9089	11.6846		14.3367	7.64616
		96	21.8385	11.497		14.2907	7.52341
		96.25	21.5826	11.2257		14.1232	7.34585
		96.5	21.3436	11.1662		13.9668	7.30689
		96.75	21.3139	11.1794		13.9474	7.31554
		97	21.2982	11.174		13.9371	7.31199
		97.25	20.9796	11.1612		13.7286	7.30365
		97.5	20.9433	10.9905		13.7048	7.19197
		97.75	20.9063	10.8797		13.6806	7.11945
		98	20.9196	10.8825		13.6893	7.12127
		98.25	20.8063	10.9598		13.6152	7.17185
		98.5	20.9629	10.7364		13.7176	7.02565
		98.75	20.8945	10.7644		13.6729	7.04398
		99	20.9148	10.5925		13.6862	6.93152
		99.25	20.9333	10.5105		13.6983	6.87784
		99.5	20.9859	10.4577		13.7327	6.84329
		99.75	21.0508	10.3424		13.7752	6.76783
		100	21.1002	10.4379		13.8075	6.83033
		100.25	21.2244	10.5646		13.8888	6.91325
		100.5	21.127	10.4253		13.8251	6.82209
		100.75	21.359	10.3337		13.9768	6.76213
		101	21.3304	10.4361		13.9582	6.82915
		101.25	21.2821	10.2479		13.9265	6.70602
		101.5	21.2076	10.2488		13.8778	6.7066
		101.75	21.254	10.2229		13.9081	6.68961
		102	21.3556	10.2464		13.9746	6.705
		102.25	21.2817	10.2459		13.9263	6.70471
		102.5	21.3477	10.2268		13.9695	6.69222
		102.75	21.6197	10.1614		14.1475	6.64937
		103	21.3717	10.1923		13.9852	6.66961
		103.25	21.3917	10.2009		13.9982	6.67526
		103.5	21.5841	10.2949		14.1242	6.73673
		103.75	21.6288	10.2521		14.1534	6.70878
		104	21.5512	10.2129		14.1026	6.68308
		104.25	21.4519	10.3252		14.0376	6.75658
		104.5	21.5334	10.2435		14.091	6.70311
		104.75	21.6687	10.2588		14.1795	6.71314
		105	21.5705	10.2909		14.1152	6.73411
		105.25	21.6827	10.2175		14.1887	6.68613
		105.5	21.6831	10.348		14.1889	6.77149
		105.75	21.7988	10.4465		14.2647	6.83593
		106	21.8049	10.3706		14.2687	6.78627
		106.25	21.6174	10.4154		14.146	6.81562
		106.5	21.7596	10.4154		14.239	6.81562
		106.75	21.7493	10.371		14.2323	6.78657
		107	21.6732	10.3276		14.1825	6.75818
		107.25	21.7291	10.3704		14.219	6.78613
		107.5	21.6432	10.5506		14.1629	6.90405
		107.75	21.7025	10.4069		14.2016	6.81004
		108	21.6751	10.4539		14.1837	6.84079
		108.25	21.9453	10.4195		14.3605	6.81827
		108.5	21.701	10.3413		14.2006	6.7671
		108.75	21.7672	10.4181		14.244	6.81739
		109	21.953	10.4514		14.3656	6.83917
		109.25	21.9051	10.4546		14.3342	6.84123
		109.5	21.7927	10.4963		14.2607	6.86853
		109.75	21.9338	10.3634		14.353	6.78159
		110	21.7504	10.5098		14.233	6.8774
		110.25	21.9653	10.4442		14.3736	6.83445
		110.5	21.7916	10.5286		14.2599	6.88968
		110.75	21.9311	10.6892		14.3513	6.99477
		111	21.9526	10.5272		14.3653	6.88879
		111.25	21.8584	10.654		14.3037	6.97175
		111.5	21.7969	10.4802		14.2634	6.85804
		111.75	21.7276	10.5794		14.2181	6.9229
		112	21.9542	10.4622		14.3663	6.84624
		112.25	21.9204	10.5001		14.3442	6.87104
		112.5	21.9139	10.4742		14.34	6.85406
		112.75	21.8301	10.5431		14.2852	6.89916
		113	22.0156	10.646		14.4065	6.96653
		113.25	21.8917	10.6223		14.3254	6.95102
		113.5	22.0221	10.6476		14.4108	6.96757
		113.75	21.9089	10.5723		14.3367	6.9183
		114	21.9584	10.5944		14.3691	6.93271
		114.25	22.0564	10.5433		14.4332	6.89931
		114.5	22.0853	10.6707		14.4521	6.98266
		114.75	21.9975	10.5646		14.3947	6.91325
		115	22.081	10.5277		14.4493	6.88909
		115.25	21.9158	10.4911		14.3412	6.86513
		115.5	22.1427	10.7458		14.4897	7.0318
		115.75	21.9745	10.6958		14.3796	6.99911
		116	21.8622	10.5521		14.3062	6.90509
		116.25	21.7394	10.6422		14.2258	6.96399
		116.5	21.9162	10.563		14.3415	6.91221
		116.75	21.7977	10.5741		14.2639	6.91949
		117	21.7927	10.4627		14.2607	6.84654
		117.25	21.8657	10.5012		14.3084	6.87178
		117.5	21.7863	10.5306		14.2564	6.89101
		117.75	21.6561	10.6915		14.1713	6.99627
		118	21.8557	10.6005		14.3019	6.93673
		118.25	21.8531	10.4489		14.3002	6.83755
		118.5	21.7455	10.5778		14.2298	6.92186
		118.75	21.7207	10.4938		14.2136	6.8669
		119	21.5886	10.5186		14.1271	6.88317
		119.25	21.7401	10.5379		14.2263	6.89575
		119.5	21.76	10.6044		14.2392	6.93926
		119.75	21.4809	10.588		14.0566	6.92855
		120	21.5482	10.5633		14.1006	6.91236
		120.25	21.4139	10.4134		14.0128	6.8143
		120.5	21.2854	10.551		13.9287	6.90435
		120.75	21.1516	10.5058		13.8412	6.87473
		121	21.1692	10.4793		13.8526	6.85745
		121.25	21.2948	10.4451		13.9348	6.83504
		121.5	21.3762	10.424		13.9881	6.82121
		121.75	22.1674	10.3198		14.5059	6.75307
		122	22.71	10.2326		14.8609	6.696
		122.25	24.365	10.3771		15.9439	6.79052
		122.5	26.4786	10.4408		17.327	6.83224
		122.75	30.9585	10.5044		20.2586	6.87385
		123	38.5169	10.1753		25.2046	6.65847
		123.25	46.8884	10.3187		30.6827	6.75234
		123.5	55.7611	10.3428		36.4888	6.76812
		123.75	64.2956	10.2171		42.0736	6.68584
		124	72.4349	10.13		47.3998	6.62887
		124.25	79.7518	10.1649		52.1878	6.65168
		124.5	86.4867	10.0127		56.595	6.55206
		124.75	92.254	10.3355		60.369	6.7633
		125	97.4548	10.3256		63.7723	6.75687
		125.25	101.248	10.5619		66.2545	6.91147
		125.5	105.506	10.8566		69.0411	7.10431
		125.75	109.712	11.1784		71.7932	7.31492
		126	113.946	11.9729		74.5638	7.83478
		126.25	118.173	12.7929		77.3297	8.37139
		126.5	122.105	13.931		79.9029	9.11613
		126.75	126.441	15.1085		82.7402	9.88669
		127	129.849	16.6203		84.9703	10.876
		127.25	132.693	18.2912		86.8316	11.9693
		127.5	135.704	20.2792		88.8015	13.2703
		127.75	137.482	22.4336		89.9651	14.6801
		128	139.614	24.7318		91.3602	16.1839
		128.25	141.937	27.1099		92.8802	17.7401
		128.5	144.203	29.5792		94.3632	19.356
		128.75	145.452	32.4337		95.1808	21.2239
		129	147.492	34.7998		96.5154	22.7722
		129.25	148.747	38.1987		97.3367	24.9964
		129.5	150.61	40.6253		98.5561	26.5843
		129.75	152.675	43.4448		99.9074	28.4293
		130	153.371	46.5596		100.363	30.4676
		130.25	154.688	49.1145		101.225	32.1394
		130.5	156.384	51.8772		102.335	33.9473
		130.75	157.465	54.2766		103.042	35.5174
		131	158.045	56.889		103.421	37.2269
		131.25	158.744	59.5232		103.878	38.9506
		131.5	159.884	61.6606		104.625	40.3494
		131.75	160.115	64.0766		104.776	41.9303
		132	161.312	66.2004		105.559	43.3201
		132.25	161.908	69.042		105.949	45.1796
		132.5	163.062	70.9395		106.704	46.4212
		132.75	165.17	72.9319		108.084	47.725
		133	165.814	74.9102		108.505	49.0196
		133.25	165.638	77.0792		108.39	50.4389
		133.5	165.283	78.3291		108.157	51.2568
		133.75	163.137	80.4075		106.754	52.6169
		134	161.606	82.2064		105.751	53.7941
		134.25	160.748	83.6568		105.19	54.7431
		134.5	160.818	85.6067		105.236	56.0191
		134.75	160.176	86.4286		104.816	56.557
		135	159.495	87.7119		104.37	57.3967
		135.25	159.71	88.5795		104.511	57.9645
		135.5	160.231	90.8299		104.851	59.4371
		135.75	160.921	91.1637		105.303	59.6555
		136	161.439	92.9061		105.642	60.7957
		136.25	162.269	94.5832		106.186	61.8931
		136.5	162.316	95.2467		106.216	62.3273
		136.75	163.609	96.6631		107.062	63.2542
		137	163.113	98.0378		106.738	64.1538
		137.25	164.298	99.2311		107.513	64.9347
		137.5	164.58	100.402		107.698	65.7007
		137.75	164.692	101.708		107.771	66.5552
		138	165.323	103.334		108.184	67.6196
		138.25	165.411	104.72		108.241	68.5266
		138.5	165.72	105.937		108.443	69.3226
		138.75	165.814	107.68		108.505	70.4633
		139	166.851	109.561		109.184	71.6945
		139.25	166.266	110.136		108.801	72.0704
		139.5	166.447	111.339		108.919	72.8578
		139.75	167.732	112.81		109.76	73.8205
		140	167.972	114.165		109.917	74.707
		140.25	168.974	115.021		110.573	75.267
		140.5	170.016	116.273		111.255	76.0863
		140.75	171.112	117.538		111.972	76.9141
		141	171.478	118.655		112.211	77.645
		141.25	172.02	119.25		112.566	78.0343
		141.5	172.79	120.018		113.07	78.5372
		141.75	173.051	121.129		113.241	79.2643
		142	173.678	121.385		113.651	79.4316
		142.25	173.058	123.368		113.245	80.7291
		142.5	173.877	124.35		113.781	81.372
		142.75	174.534	124.192		114.211	81.2686
		143	174.812	125.136		114.393	81.8865
		143.25	175.441	126.583		114.805	82.8331
		143.5	175.811	126.737		115.047	82.9339
		143.75	176.001	127.75		115.171	83.5971
		144	177.415	128.105		116.096	83.8292
		144.25	177.535	128.58		116.175	84.14
		144.5	178.75	129.622		116.97	84.8217
		144.75	178.32	129.709		116.689	84.8784
		145	179.106	130.989		117.203	85.7166
		145.25	178.886	131.597		117.059	86.114
		145.5	179.003	131.602		117.136	86.1176
		145.75	179.812	132.191		117.665	86.5026
		146	179.545	131.958		117.49	86.3505
		146.25	180.245	133.244		117.949	87.192
		146.5	180.879	133.259		118.363	87.2015
		146.75	181.892	133.966		119.026	87.6641
		147	182.497	135.322		119.422	88.5517
		147.25	182.537	134.584		119.448	88.069
		147.5	183.883	135.298		120.329	88.536
		147.75	183.743	135.691		120.238	88.7934
		148	183.903	136.925		120.342	89.6005
		148.25	184.294	136.199		120.598	89.1256
		148.5	184.465	137.429		120.71	89.9307
		148.75	184.684	138.293		120.853	90.496
		149	186.014	137.746		121.723	90.138
		149.25	185.263	138.502		121.232	90.6329
		149.5	185.48	138.116		121.374	90.3802
		149.75	186.709	139.403		122.178	91.2224
		150	185.912	139.835		121.657	91.5048
		150.25	185.847	139.9		121.614	91.5472
		150.5	186.974	139.981		122.351	91.6008
		150.75	186.201	140.52		121.846	91.9532
		151	187.126	139.587		122.451	91.343
		151.25	187.216	140.302		122.51	91.8105
		151.5	187.903	140.577		122.959	91.9907
		151.75	187.435	141.755		122.653	92.7616
		152	187.992	141.941		123.018	92.8829
		152.25	188.297	142.033		123.217	92.9436
		152.5	188.32	142.986		123.233	93.5667
		152.75	187.918	143.297		122.969	93.7706
		153	188.31	142.299		123.226	93.117
		153.25	188.274	143.221		123.202	93.7209
		153.5	188.826	144.596		123.564	94.6203
		153.75	189.101	144.592		123.744	94.6178
		154	188.02	144.211		123.036	94.3684
		154.25	187.698	145.331		122.825	95.1017
		154.5	188.036	146.445		123.046	95.8301
		154.75	188.751	145.834		123.515	95.4308
		155	188.461	146.522		123.325	95.8809
		155.25	187.685	147.197		122.817	96.3227
		155.5	187.944	146.395		122.986	95.7975
		155.75	187.9	146.806		122.958	96.0663
		156	188.793	147.592		123.542	96.5811
		156.25	188.456	147.313		123.322	96.3987
		156.5	187.557	147.709		122.733	96.6573
		156.75	188.528	147.261		123.369	96.3646
		157	190.163	148.304		124.438	97.0471
		157.25	189.042	148.248		123.705	97.0101
		157.5	189.808	148.429		124.206	97.1289
		157.75	190.057	148.048		124.369	96.8796
		158	189.956	147.918		124.303	96.794
		158.25	189.907	149.239		124.271	97.6585
		158.5	190.145	148.799		124.427	97.3709
		158.75	190.767	149.444		124.834	97.7927
		159	191.366	149.785		125.226	98.0163
		159.25	191.561	149.338		125.354	97.7236
		159.5	191.439	149.788		125.273	98.0176
		159.75	192.118	149.712		125.718	97.9683
		160	192.414	150.146		125.911	98.2524
		160.25	192.464	150.173		125.944	98.2698
		160.5	191.567	150.955		125.357	98.7813
		160.75	191.896	150.277		125.572	98.3379
		161	191.81	149.985		125.516	98.147
		161.25	192.325	150.477		125.853	98.469
		161.5	192.249	150.836		125.803	98.7035
		161.75	192.495	150.881		125.965	98.733
		162	192.364	151.848		125.879	99.3657
		162.25	193.442	150.455		126.584	98.4543
		162.5	195.032	151.053		127.625	98.8458
		162.75	194.801	151.557		127.473	99.1755
		163	195.021	152.723		127.618	99.9385
		163.25	196.446	152.796		128.55	99.9861
		163.5	196.397	151.899		128.518	99.3995
		163.75	194.891	152.926		127.533	100.072
		164	195.146	151.52		127.699	99.1512
		164.25	195.21	152.464		127.741	99.7689
		164.5	193.988	152.499		126.941	99.792
		164.75	195.208	153.043		127.739	100.148
		165	194.279	153.041		127.132	100.147
		165.25	194.062	152.209		126.99	99.6023
		165.5	194.586	153.143		127.333	100.213
		165.75	194.798	152.719		127.472	99.9358
		166	195.146	152.522		127.699	99.8069
		166.25	195.927	153.143		128.21	100.213
		166.5	195.327	153.981		127.818	100.762
		166.75	195.141	153.927		127.696	100.726
		167	195.86	152.951		128.167	100.088
		167.25	195.224	153.827		127.75	100.661
		167.5	195.916	154.413		128.203	101.044
		167.75	195.666	154.434		128.039	101.058
		168	196.505	153.85		128.588	100.676
		168.25	196.577	154.491		128.636	101.095
		168.5	196.189	154.191		128.382	100.899
		168.75	196.783	154.669		128.771	101.212
		169	197.237	155.092		129.068	101.489
		169.25	197.132	154.745		128.999	101.262
		169.5	198.267	154.463		129.741	101.077
		169.75	197.719	155.337		129.383	101.649
		170	198.123	155.204		129.648	101.562
		170.25	197.554	155.031		129.275	101.449
		170.5	197.77	155.656		129.416	101.858
		170.75	198.102	156.168		129.633	102.193
		171	197.186	155.861		129.034	101.992
		171.25	198.185	156.122		129.688	102.162
		171.5	197.765	156.582		129.413	102.464
		171.75	198.421	156.614		129.842	102.485
		172	198.445	157.943		129.858	103.354
		172.25	198.188	156.451		129.69	102.378
		172.5	198.037	157.656		129.591	103.166
		172.75	198.957	157.694		130.193	103.192
		173	198.296	157.688		129.761	103.187
		173.25	199.068	158.459		130.266	103.692
		173.5	199.041	158.224		130.248	103.538
		173.75	198.429	157.937		129.847	103.35
		174	198.67	158.254		130.005	103.558
		174.25	199.933	158.987		130.832	104.037
		174.5	199.03	158.13		130.241	103.477
		174.75	199.006	159.019		130.225	104.059
		175	198.496	159.134		129.892	104.134
		175.25	199.72	159.56		130.693	104.412
		175.5	199.171	159.052		130.333	104.08
		175.75	199.139	159.677		130.312	104.489
		176	199.367	159.714		130.461	104.513
		176.25	200.167	160.433		130.985	104.984
		176.5	200.255	160.255		131.042	104.867
		176.75	199.827	159.547		130.762	104.404
		177	199.41	159.749		130.49	104.536
		177.25	200.618	160.263		131.28	104.873
		177.5	199.767	160.616		130.723	105.104
		177.75	199.859	159.861		130.783	104.61
		178	201.075	160.612		131.579	105.101
		178.25	200.465	160.577		131.18	105.078
		178.5	201.141	160.153		131.622	104.8
		178.75	201.117	160.253		131.606	104.866
		179	200.323	160.085		131.087	104.756
		179.25	200.192	160.662		131.001	105.134
		179.5	201.429	161.182		131.811	105.474
		179.75	201.114	160.601		131.604	105.094
		180	201.114	161.193		131.604	105.481
		180.25	201.743	160.2		132.016	104.832
		180.5	201.844	159.877		132.083	104.62
		180.75	201.836	161.329		132.077	105.57
		181	202.699	160.494		132.642	105.024
		181.25	201.792	161.322		132.048	105.566
		181.5	202.542	161.049		132.539	105.387
		181.75	201.922	161.425		132.133	105.633
		182	202.429	161.327		132.465	105.569
		182.25	202.492	161.697		132.506	105.811
		182.5	202.36	162.426		132.42	106.288
		182.75	202.65	161.93		132.609	105.964
		183	201.88	162.247		132.106	106.171
		183.25	202.874	162.26		132.756	106.18
		183.5	203.267	161.97		133.013	105.989
		183.75	202.702	162.357		132.644	106.243
		184	203.519	161.603		133.179	105.749
		184.25	203.569	162.642		133.211	106.429
		184.5	203.156	162.001		132.941	106.01
		184.75	202.316	162.278		132.391	106.191
		185	202.824	162.715		132.723	106.477
		185.25	203.733	162.141		133.318	106.102
		185.5	203.142	162.836		132.932	106.556
		185.75	204.462	162.353		133.796	106.24
		186	203.381	162.759		133.088	106.506
		186.25	205.234	162.379		134.3	106.257
		186.5	204.248	162.834		133.655	106.555
		186.75	203.397	161.713		133.099	105.821
		187	204.828	162.657		134.035	106.439
		187.25	204.198	162.432		133.622	106.292
		187.5	204.686	162.452		133.942	106.305
		187.75	205.234	162.556		134.3	106.373
		188	204.705	163.692		133.955	107.116
		188.25	205.494	162.766		134.471	106.51
		188.5	204.8	162.666		134.017	106.445
		188.75	205.136	163.128		134.236	106.748
		189	206.022	162.75		134.816	106.5
		189.25	205.427	162.364		134.427	106.247
		189.5	205.469	163.164		134.454	106.771
		189.75	205.334	161.987		134.366	106.001
		190	205.13	161.719		134.233	105.826
		190.25	204.691	162.52		133.945	106.35
		190.5	205.617	162.737		134.551	106.491
		190.75	205.699	163.752		134.605	107.156
		191	205.082	162.671		134.201	106.448
		191.25	205.466	163.23		134.452	106.814
		191.5	205.382	162.39		134.397	106.265
		191.75	205.225	162.706		134.295	106.471
		192	205.977	162.858		134.787	106.571
		192.25	205.915	163.492		134.746	106.986
		192.5	205.954	163.292		134.772	106.855
		192.75	205.637	163.712		134.564	107.129
		193	206.151	162.962		134.901	106.639
		193.25	206.148	163.552		134.899	107.025
		193.5	206.072	163.632		134.849	107.077
		193.75	205.848	164.224		134.702	107.464
		194	206.179	164.242		134.919	107.476
		194.25	205.727	164.501		134.623	107.646
		194.5	206.861	164.302		135.365	107.516
		194.75	206.126	164.784		134.884	107.831
		195	206.94	163.102		135.417	106.73
		195.25	206.421	164.313		135.077	107.523
		195.5	207.022	163.939		135.471	107.278
		195.75	206.545	165.304		135.159	108.171
		196	206.703	164.219		135.262	107.462
		196.25	206.796	163.292		135.323	106.855
		196.5	206.807	164.467		135.33	107.624
		196.75	206.573	164.266		135.177	107.492
		197	206.946	163.916		135.421	107.263
		197.25	207.775	164.67		135.963	107.757
		197.5	206.898	164.579		135.389	107.697
		197.75	207.721	165.286		135.928	108.16
		198	206.782	164.612		135.314	107.719
		198.25	207.511	164.847		135.791	107.872
		198.5	207.406	165.022		135.722	107.987
		198.75	207.692	164.09		135.909	107.377
		199	207.35	164.61		135.685	107.717
		199.25	207.126	165.051		135.539	108.006
		199.5	208.112	165.037		136.184	107.997
		199.75	208.214	165.078		136.251	108.023
		200	207.477	165.504		135.768	108.302
		200.25	207.022	166.168		135.471	108.737
		200.5	207.749	164.93		135.946	107.926
		200.75	207.667	166.044		135.893	108.656
		201	207.52	165.123		135.796	108.053
		201.25	207.701	165.684		135.915	108.42
		201.5	208.266	164.93		136.284	107.926
		201.75	207.999	165.019		136.11	107.985
		202	208.26	165.004		136.281	107.975
		202.25	208.288	165.291		136.299	108.163
		202.5	207.341	165.174		135.68	108.086
		202.75	207.956	165.486		136.082	108.29
		203	209.103	164.378		136.832	107.565
		203.25	209.228	164.525		136.914	107.662
		203.5	208.482	164.409		136.426	107.586
		203.75	207.936	165.76		136.069	108.47
		204	208.496	165.194		136.435	108.099
		204.25	208.138	165.817		136.201	108.507
		204.5	208.818	165.713		136.646	108.439
		204.75	209.22	167.127		136.909	109.364
		205	209.265	165.607		136.939	108.37
		205.25	208.195	165.358		136.238	108.207
		205.5	207.806	164.899		135.983	107.906
		205.75	208.704	166.631		136.571	109.04
		206	208.701	166.238		136.569	108.782
		206.25	209.191	166.658		136.89	109.057
		206.5	208.348	165.776		136.338	108.48
		206.75	209.117	166.175		136.842	108.741
		207	207.806	166.419		135.983	108.901
		207.25	209.677	166.337		137.208	108.847
		207.5	209.84	165.956		137.315	108.598
		207.75	208.553	165.781		136.472	108.483
		208	209.237	165.83		136.92	108.516
		208.25	209.588	165.884		137.15	108.551
		208.5	209.878	165.596		137.339	108.362
		208.75	209.026	165.704		136.782	108.433
		209	209.706	166.568		137.227	108.998
		209.25	210.055	165.704		137.455	108.433
		209.5	209.955	166.676		137.39	109.069
		209.75	208.763	166.464		136.61	108.93
		210	209.926	166.697		137.371	109.083
		210.25	209.46	166.473		137.066	108.936
		210.5	209.946	166.306		137.384	108.827
		210.75	209.548	167.896		137.124	109.867
		211	209.835	167.302		137.311	109.479
		211.25	209.551	166.765		137.126	109.127
		211.5	209.103	167.543		136.832	109.636
		211.75	210.047	167.012		137.45	109.289
		212	210.17	166.588		137.531	109.012
		212.25	209.34	167.402		136.987	109.544
		212.5	210.831	166.801		137.963	109.151
		212.75	210.199	167.032		137.549	109.302
		213	209.732	166.118		137.244	108.704
		213.25	210.067	167.218		137.463	109.424
		213.5	209.331	166.654		136.982	109.055
		213.75	210.351	167.282		137.649	109.465
		214	210.578	165.774		137.797	108.479
		214.25	209.194	166.654		136.892	109.055
		214.5	210.54	167.37		137.773	109.523
		214.75	210.816	166.826		137.954	109.167
		215	210.868	167.416		137.987	109.553
		215.25	210.161	167.35		137.525	109.51
		215.5	211.038	166.991		138.099	109.275
		215.75	210.273	166.91		137.598	109.222
		216	210.865	167.466		137.986	109.586
		216.25	210.799	167.232		137.942	109.433
		216.5	210.978	167.729		138.059	109.758
		216.75	210.084	167.497		137.474	109.607
		217	211.416	167.566		138.346	109.651
		217.25	211.629	168.147		138.486	110.031
		217.5	211.032	167.95		138.095	109.903
		217.75	210.931	167.941		138.029	109.897
		218	211.044	168.144		138.102	110.03
		218.25	210.586	167.541		137.803	109.635
		218.5	210.782	167.969		137.931	109.915
		218.75	210.147	167.391		137.516	109.537
		219	210.595	168.242		137.809	110.094
		219.25	210.739	168.055		137.903	109.972
		219.5	210.638	168.229		137.837	110.085
		219.75	209.812	168.247		137.296	110.097
		220	210.213	167.932		137.559	109.891
		220.25	210.486	168.325		137.737	110.148
		220.5	211.081	167.586		138.127	109.665
		220.75	209.2	167.161		136.896	109.387
		221	209.883	167.595		137.343	109.671
		221.25	210.819	168.517		137.955	110.274
		221.5	210.972	168.213		138.055	110.075
		221.75	209.789	168.224		137.281	110.082
		222	210.359	167.882		137.654	109.858
		222.25	211.407	168.464		138.34	110.239
		222.5	211.202	167.516		138.206	109.618
		222.75	210.719	168.373		137.89	110.179
		223	210.17	167.941		137.531	109.897
		223.25	210.684	167.211		137.867	109.419
		223.5	210.483	168.53		137.735	110.283
		223.75	210.854	167.647		137.978	109.705
		224	211.104	168.995		138.142	110.587
		224.25	210.604	169.2		137.814	110.721
		224.5	210.583	168.741		137.801	110.42
		224.75	211.015	169.085		138.084	110.645
		225	210.041	169.289		137.446	110.779
		225.25	211.096	168.512		138.136	110.271
		225.5	211.364	168.51		138.312	110.269
		225.75	210.937	168.279		138.033	110.118
		226	211.367	169.257		138.314	110.758
		226.25	210.253	168.014		137.585	109.945
		226.5	210.667	169.383		137.856	110.841
		226.75	211.349	168.574		138.302	110.311
		227	210.69	168.956		137.871	110.561
		227.25	210.914	168.197		138.018	110.064
		227.5	210.952	168.096		138.042	109.999
		227.75	211.251	168.54		138.238	110.289
		228	210.73	168.789		137.897	110.452
		228.25	210.213	168.771		137.559	110.44
		228.5	210.862	169.246		137.984	110.751
		228.75	210.952	169.023		138.042	110.605
		229	210.857	168.332		137.98	110.152
		229.25	210.181	170.028		137.538	111.263
		229.5	211.171	169.048		138.185	110.621
		229.75	210.949	168.546		138.04	110.293
		230	211.352	168.633		138.304	110.35
		230.25	211.537	169.016		138.425	110.6
		230.5	210.305	168.757		137.619	110.431
		230.75	210.816	168.952		137.954	110.558
		231	210.716	168.549		137.888	110.295
		231.25	211.991	168.894		138.722	110.521
		231.5	210.888	169.397		138.001	110.85
		231.75	211.757	169.05		138.569	110.623
		232	210.652	169.03		137.846	110.609
		232.25	211.629	169.931		138.486	111.199
		232.5	211.07	169.874		138.119	111.162
		232.75	210.56	170.301		137.786	111.441
		233	211.67	168.124		138.512	110.016
		233.25	212.049	168.622		138.76	110.342
		233.5	212.278	169.083		138.91	110.644
		233.75	211.549	169.264		138.433	110.763
		234	211.073	169.151		138.121	110.689
		234.25	212.304	168.878		138.927	110.51
		234.5	211.214	169.825		138.214	111.13
		234.75	211.716	169.388		138.542	110.844
		235	211.537	168.959		138.425	110.563
		235.25	211.823	169.2		138.612	110.721
		235.5	211.823	169.273		138.612	110.769
		235.75	211.104	169		138.142	110.59
		236	211.246	170.056		138.234	111.281
		236.25	210.788	169.662		137.935	111.023
		236.5	211.965	169.489		138.705	110.91
		236.75	212.066	168.979		138.771	110.576
		237	211.346	169.294		138.3	110.782
		237.25	212.536	169.65		139.079	111.015
		237.5	211.658	169.897		138.505	111.177
		237.75	211.644	168.837		138.495	110.483
		238	212.046	170.128		138.758	111.328
		238.25	211.684	169.234		138.522	110.743
		238.5	211.508	169.294		138.406	110.782
		238.75	211.95	169.446		138.696	110.881
		239	211.921	169.42		138.677	110.865
		239.25	211.459	169.17		138.374	110.701
		239.5	211.748	169.641		138.563	111.009
		239.75	211.586	169.498		138.457	110.916
		240	212.376	169.892		138.974	111.174
		240.25	212.971	169.772		139.364	111.095
		240.5	212.098	169.11		138.792	110.662
		240.75	211.015	168.624		138.084	110.344
		241	212.353	168.757		138.959	110.431
		241.25	211.413	169.08		138.344	110.642
		241.5	213.163	168.755		139.489	110.429
		241.75	212.188	169.154		138.851	110.69
		242	211.612	169.632		138.474	111.003
		242.25	212.559	169.729		139.094	111.067
		242.5	211.058	170.021		138.112	111.258
		242.75	211.655	169.167		138.503	110.699
		243	212.167	170.146		138.838	111.34
		243.25	212.75	169.351		139.219	110.82
		243.5	212.11	169.595		138.8	110.979
		243.75	211.759	169.39		138.571	110.845
		244	212.055	169.722		138.764	111.062
		244.25	212.364	169.544		138.967	110.946
		244.5	213.027	169.925		139.4	111.195
		244.75	212.576	169.899		139.105	111.178
		245	211.84	168.528		138.624	110.281
		245.25	212.396	169.952		138.987	111.213
		245.5	211.921	170.417		138.677	111.517
		245.75	211.488	169.747		138.393	111.079
		246	212.075	170.889		138.777	111.826
		246.25	213.032	169.135		139.404	110.678
		246.5	212.043	170.1		138.756	111.31
		246.75	212.341	168.814		138.951	110.468
		247	211.589	169.692		138.459	111.043
		247.25	212.922	170.868		139.331	111.812
		247.5	212.014	169.549		138.737	110.949
		247.75	212.028	170.294		138.747	111.437
		248	211.924	170.393		138.679	111.502
		248.25	212.617	170.518		139.132	111.583
		248.5	212.678	170.78		139.172	111.755
		248.75	212.771	169.92		139.232	111.192
		249	211.731	170.396		138.552	111.503
		249.25	212.75	170.569		139.219	111.617
		249.5	212.765	170.326		139.229	111.458
		249.75	213.187	170.063		139.505	111.285
		250	212.666	170.588		139.164	111.629
		250.25	212.124	170.555		138.809	111.608
		250.5	211.78	170.262		138.584	111.415
		250.75	211.956	170.521		138.699	111.585
		251	212.501	169.961		139.056	111.219
		251.25	212.989	171.463		139.375	112.201
		251.5	212.321	170.854		138.938	111.803
		251.75	212.188	170.541		138.851	111.599
		252	212.031	170.692		138.749	111.697
		252.25	212.507	169.945		139.06	111.208
		252.5	213.027	170.287		139.4	111.432
		252.75	212.086	170.248		138.785	111.406
		253	212.278	170.1		138.91	111.31
		253.25	213.044	170.442		139.411	111.533
		253.5	212.028	170.084		138.747	111.299
		253.75	211.687	170.412		138.523	111.514
		254	212.376	169.664		138.974	111.024
		254.25	211.843	170.504		138.626	111.574
		254.5	212.867	170.243		139.295	111.403
		254.75	212.695	170.375		139.183	111.49
		255	213.009	170.722		139.388	111.717
		255.25	212.344	171.812		138.953	112.43
		255.5	212.446	171.596		139.02	112.288
		255.75	212.182	171.365		138.847	112.138
		256	212.42	173.415		139.003	113.479
		256.25	212.739	174.181		139.212	113.98
		256.5	212.695	175.136		139.183	114.605
		256.75	213.58	176.257		139.762	115.339
		257	212.652	177.845		139.155	116.378
		257.25	212.858	179.648		139.29	117.557
		257.5	212.707	180.427		139.191	118.068
		257.75	211.835	180.949		138.62	118.409
		258	212.658	182.031		139.158	119.117
		258.25	213.091	184.521		139.442	120.746
		258.5	212.298	186.08		138.923	121.767
		258.75	212.425	187.62		139.006	122.774
		259	212.872	186.969		139.299	122.348
		259.25	212.852	189.735		139.286	124.159
		259.5	211.852	190.171		138.631	124.444
		259.75	212.992	191.251		139.377	125.15
		260	212.666	191.919		139.164	125.588
		260.25	212.727	193.208		139.204	126.431
		260.5	213.667	193.707		139.819	126.758
		260.75	212.364	195.667		138.967	128.04
		261	213.242	196.604		139.541	128.653
		261.25	212.989	195.3		139.375	127.8
		261.5	212.547	196.786		139.086	128.772
		261.75	212.936	198.995		139.341	130.218
		262	212.217	199.428		138.87	130.501
		262.25	212.263	199.331		138.9	130.438
		262.5	212.942	201.435		139.345	131.815
		262.75	212.597	200.785		139.118	131.389
		263	214.018	202.137		140.049	132.274
		263.25	212.533	202.888		139.077	132.765
		263.5	212.721	203.205		139.2	132.973
		263.75	213.16	203.172		139.487	132.951
		264	212.222	202.436		138.874	132.47
		264.25	213.289	203.722		139.571	133.311
		264.5	212.692	204.138		139.181	133.583
		264.75	213.251	203.029		139.547	132.857
		265	213.837	205.561		139.93	134.514
		265.25	212.939	205.24		139.343	134.304
		265.5	213.233	205.242		139.535	134.306
		265.75	213.56	205.34		139.749	134.37
		266	212.463	205.159		139.031	134.251
		266.25	212.707	205.823		139.191	134.686
		266.5	212.512	206.516		139.063	135.139
		266.75	212.634	206.263		139.143	134.974
		267	212.954	206.746		139.352	135.29
		267.25	213.236	206.636		139.537	135.218
		267.5	213.834	206.76		139.928	135.299
		267.75	212.254	207.069		138.895	135.502
		268	213.35	208.122		139.611	136.19
		268.25	213.574	206.878		139.758	135.376
		268.5	212.997	208.47		139.381	136.418
		268.75	212.475	207.749		139.039	135.946
		269	212.887	208.332		139.309	136.328
		269.25	212.498	206.943		139.054	135.419
		269.5	213.251	208.589		139.547	136.496
		269.75	213.924	207.876		139.987	136.029
		270	212.486	207.67		139.046	135.895
		270.25	213.568	208.383		139.754	136.361
		270.5	212.362	208.3		138.965	136.307
		270.75	213.006	209.468		139.387	137.071
		271	213.93	209.416		139.991	137.037
		271.25	213.192	209.157		139.508	136.868
		271.5	213.469	209.083		139.689	136.82
		271.75	213.029	209.456		139.402	137.064
		272	213.251	209.155		139.547	136.866
		272.25	213.72	208.609		139.854	136.509
		272.5	213.484	210.172		139.699	137.532
		272.75	213.131	209.166		139.468	136.874
		273	214.193	209.058		140.163	136.803
		273.25	212.716	209.362		139.196	137.002
		273.5	213.942	209.718		139.999	137.235
		273.75	214.366	211.178		140.276	138.19
		274	214.117	209.525		140.114	137.108
		274.25	214.255	211.333		140.204	138.292
		274.5	214.05	210.624		140.07	137.828
		274.75	214.612	209.892		140.437	137.349
		275	213.545	211.287		139.739	138.262
		275.25	214.082	209.79		140.091	137.282
		275.5	214.091	212.364		140.096	138.967
		275.75	214.357	211.569		140.271	138.446
		276	213.872	210.897		139.953	138.006
		276.25	214.571	211.215		140.41	138.215
		276.5	214.129	210.742		140.121	137.905
		276.75	214.498	210.879		140.363	137.995
		277	214.685	210.072		140.485	137.467
		277.25	213.743	210.871		139.869	137.989
		277.5	214.764	212.949		140.537	139.349
		277.75	213.825	211.753		139.922	138.566
		278	214.187	211.321		140.16	138.284
		278.25	214.976	211.296		140.675	138.267
		278.5	213.711	211.79		139.848	138.591
		278.75	213.819	212.047		139.919	138.759
		279	214.94	212.096		140.652	138.791
		279.25	214.442	211.166		140.326	138.183
		279.5	214.562	212.44		140.405	139.016
		279.75	214.489	212.518		140.357	139.067
		280	214.794	212.252		140.556	138.893
		280.25	213.781	211.652		139.894	138.501
		280.5	213.98	212.047		140.024	138.759
		280.75	214.568	211.646		140.409	138.497
		281	214.383	210.813		140.288	137.952
		281.25	214.205	210.43		140.171	137.7
		281.5	214.559	210.687		140.403	137.869
		281.75	215.199	210.664		140.821	137.854
		282	214.852	210.788		140.595	137.935
		282.25	214.381	211.106		140.286	138.143
		282.5	214.287	210.527		140.225	137.764
		282.75	215.331	212.434		140.908	139.012
		283	214.591	211.629		140.424	138.485
		283.25	213.195	211.382		139.51	138.324
		283.5	214.319	210.997		140.246	138.072
		283.75	215.196	210.453		140.819	137.715
		284	213.942	210.192		139.999	137.545
		284.25	214.964	211.759		140.668	138.57
		284.5	214.337	211.143		140.257	138.168
		284.75	214.533	210.934		140.386	138.03
		285	214.891	211.304		140.62	138.273
		285.25	213.994	211.445		140.033	138.365
		285.5	214.77	209.987		140.541	137.411
		285.75	215.832	210.862		141.236	137.984
		286	214.723	209.433		140.51	137.049
		286.25	213.866	210.986		139.949	138.064
		286.5	214.468	210.301		140.343	137.616
		286.75	214.199	210.358		140.167	137.654
		287	214.422	210.218		140.313	137.562
		287.25	214.565	210.275		140.407	137.599
		287.5	214.747	210.92		140.526	138.021
		287.75	215.478	208.737		141.004	136.593
		288	214.864	208.833		140.602	136.656
		288.25	214.345	210.398		140.263	137.68
		288.5	214.287	209.647		140.225	137.188
		288.75	214.817	210.184		140.572	137.54
		289	213.822	209.872		139.92	137.336
		289.25	215.046	209.322		140.721	136.976
		289.5	216.023	209.898		141.361	137.353
		289.75	215.402	209.465		140.954	137.069
		290	214.7	210.882		140.495	137.997
		290.25	215.64	209.801		141.11	137.289
		290.5	214.676	211.408		140.48	138.341
		290.75	214.979	209.32		140.677	136.974
		291	215.799	212.024		141.214	138.744
		291.25	214.363	210.899		140.274	138.008
		291.5	214.791	209.59		140.554	137.151
		291.75	215.814	211.069		141.224	138.119
		292	214.914	210.653		140.635	137.847
		292.25	214.706	209.967		140.499	137.398
		292.5	214.486	210.819		140.355	137.955
		292.75	215.431	210.859		140.973	137.982
		293	215.661	210.584		141.124	137.802
		293.25	215.502	211.026		141.02	138.091
		293.5	215.443	210.578		140.981	137.798
		293.75	215.014	209.898		140.7	137.353
		294	215.826	210.902		141.232	138.01
		294.25	215.361	209.884		140.927	137.343
		294.5	216.529	210.024		141.692	137.435
		294.75	216.644	210.854		141.767	137.978
		295	215.985	210.845		141.336	137.972
		295.25	216.292	211.178		141.537	138.19
		295.5	215.737	210.765		141.174	137.92
		295.75	215.111	211.839		140.764	138.623
		296	214.55	209.69		140.397	137.216
		296.25	216.685	211.629		141.794	138.485
		296.5	215.9	210.57		141.28	137.792
		296.75	216.212	211.287		141.485	138.262
		297	216.765	210.828		141.846	137.961
		297.25	216.295	211.629		141.539	138.485
		297.5	216.28	211.29		141.529	138.263
		297.75	216.384	211.385		141.597	138.325
		298	215.911	212.385		141.288	138.98
		298.25	216.136	211.209		141.434	138.211
		298.5	216.277	212.96		141.527	139.356
		298.75	216.86	212.544		141.909	139.084
		299	216.475	213.575		141.657	139.759
		299.25	216.81	212.989		141.876	139.375
		299.5	215.393	212.301		140.948	138.925
		299.75	215.593	212.373		141.079	138.972
		300	216.893	212.613		141.93	139.129
		300.25	216.307	211.693		141.546	138.527
		300.5	216.789	212.128		141.862	138.812
		300.75	217.391	212.336		142.256	138.948
		301	215.891	212.827		141.274	139.269
		301.25	217.017	212.801		142.011	139.252
		301.5	216.487	211.909		141.664	138.668
		301.75	216.831	213.674		141.889	139.824
		302	216.434	213.334		141.63	139.601
		302.25	216.416	213.302		141.618	139.58
		302.5	217.166	213.192		142.108	139.508
		302.75	216.511	212.304		141.68	138.927
		303	216.357	211.652		141.579	138.501
		303.25	215.743	212.752		141.178	139.22
		303.5	216.407	213.143		141.612	139.476
		303.75	216.177	213.997		141.461	140.035
		304	216.47	213.965		141.653	140.014
		304.25	216.546	214.119		141.703	140.115
		304.5	216.118	214.857		141.423	140.598
		304.75	216.588	214.207		141.73	140.172
		305	215.852	214.796		141.249	140.558
		305.25	217.237	214.969		142.155	140.671
		305.5	216.706	214.817		141.808	140.571
		305.75	217.038	215.091		142.025	140.751
		306	216.384	215.165		141.597	140.799
		306.25	216.402	213.91		141.608	139.978
		306.5	217.24	215.895		142.157	141.277
		306.75	216.997	216.059		141.998	141.384
		307	216.816	214.44		141.879	140.325
		307.25	216.653	215.98		141.773	141.333
		307.5	216.047	216.651		141.376	141.772
		307.75	216.683	216.112		141.792	141.419
		308	216.535	216.021		141.695	141.359
		308.25	216.47	215.818		141.653	141.227
		308.5	215.646	216.174		141.114	141.46
		308.75	215.982	215.443		141.334	140.981
		309	216.999	216.743		142	141.832
		309.25	216.958	217.182		141.973	142.119
		309.5	216.62	217.032		141.752	142.021
		309.75	216.162	216.872		141.452	141.916
		310	216.656	216.256		141.775	141.513
		310.25	216.943	215.827		141.963	141.233
		310.5	216.15	216.958		141.444	141.972
		310.75	216.668	215.648		141.783	141.115
		311	217.047	217.49		142.031	142.321
		311.25	217.593	216.566		142.388	141.716
		311.5	216.638	216.961		141.763	141.974
		311.75	216.452	216.633		141.641	141.76
		312	216.44	217.159		141.634	142.104
		312.25	217.02	216.604		142.013	141.741
		312.5	217.659	217.354		142.431	142.232
		312.75	218.046	216.89		142.684	141.928
		313	216.715	217.12		141.814	142.079
		313.25	216.721	218.089		141.817	142.712
		313.5	217.151	216.893		142.099	141.93
		313.75	217.1	215.713		142.066	141.158
		314	216.709	216.917		141.81	141.945
		314.25	217.831	216.415		142.544	141.617
		314.5	216.263	216.557		141.517	141.71
		314.75	217.555	217.449		142.363	142.294
		315	216.994	217.549		141.996	142.359
		315.25	217.376	217.135		142.246	142.088
		315.5	217.338	216.737		142.221	141.828
		315.75	217.584	218.424		142.382	142.932
		316	216.94	217.81		141.961	142.53
		316.25	217.249	216.76		142.163	141.843
		316.5	217.044	218.127		142.029	142.738
		316.75	216.685	218.496		141.794	142.979
		317	217.626	218.832		142.41	143.199
		317.25	216.703	215.93		141.806	141.3
		317.5	217.177	218.044		142.116	142.683
		317.75	216.964	217.57		141.976	142.373
		318	217.415	217.727		142.272	142.476
		318.25	216.337	218.401		141.566	142.917
		318.5	217.1	217.863		142.066	142.565
		318.75	216.419	217.333		141.62	142.218
		319	217.035	217.576		142.023	142.377
		319.25	218.105	218.686		142.723	143.103
		319.5	216.991	219.414		141.994	143.579
		319.75	217.379	218.003		142.248	142.656
		320	216.422	218.439		141.622	142.942
		320.25	217.587	219.142		142.384	143.402
		320.5	217.347	216.271		142.227	141.523
		320.75	216.789	218.21		141.862	142.792
		321	217.587	218.353		142.384	142.885
		321.25	217.442	217.863		142.289	142.565
		321.5	217.614	217.286		142.402	142.187
		321.75	216.543	218.21		141.701	142.792
		322	217.54	218.43		142.353	142.936
		322.25	216.839	218.118		141.895	142.732
		322.5	217.403	218.104		142.264	142.722
		322.75	217.822	217.97		142.538	142.635
		323	217.451	217.878		142.295	142.575
		323.25	216.573	219.044		141.721	143.337
		323.5	218.523	216.545		142.996	141.702
		323.75	217.789	217.783		142.517	142.513
		324	216.736	218.82		141.827	143.191
		324.25	217.846	217.763		142.554	142.499
		324.5	217.056	217.419		142.037	142.274
		324.75	217.361	218.627		142.237	143.064
		325	217.18	219.539		142.118	143.662
		325.25	216.902	219.032		141.936	143.33
		325.5	217.139	218.936		142.091	143.267
		325.75	217.671	219.097		142.439	143.372
		326	216.567	218.74		141.717	143.138
		326.25	216.52	217.321		141.686	142.21
		326.5	217.563	219.985		142.369	143.953
		326.75	216.221	219.062		141.49	143.349
		327	217.519	219.238		142.34	143.464
		327.25	217.323	218.359		142.211	142.889
		327.5	217.688	217.606		142.45	142.396
		327.75	217.736	219.068		142.482	143.353
		328	217.121	220.036		142.079	143.987
		328.25	216.567	218.671		141.717	143.094
		328.5	217.834	218.648		142.546	143.078
		328.75	217.563	218.904		142.369	143.246
		329	217.733	219.333		142.48	143.527
		329.25	216.396	218.225		141.605	142.802
		329.5	216.757	218.371		141.841	142.897
		329.75	217.694	218.053		142.454	142.689
		330	216.961	219.172		141.974	143.421
		330.25	216.857	218.847		141.907	143.209
		330.5	217.745	218.871		142.487	143.224
		330.75	217.668	217.721		142.437	142.472
		331	217.459	219.946		142.301	143.928
		331.25	216.322	219.754		141.556	143.802
		331.5	216.748	219.184		141.835	143.429
		331.75	216.514	218.169		141.682	142.765
		332	217.614	218.993		142.402	143.304
		332.25	216.928	219.88		141.953	143.885
		332.5	216.837	218.478		141.893	142.967
		332.75	216.505	218.594		141.676	143.043
		333	217.795	219.835		142.521	143.855
		333.25	217.691	219.548		142.452	143.667
		333.5	216.561	218.701		141.713	143.113
		333.75	216.594	220.045		141.734	143.992
		334	215.867	218.984		141.259	143.298
		334.25	213.901	219.704		139.972	143.769
		334.5	212.214	219.429		138.868	143.589
		334.75	209.343	218.086		136.989	142.711
		335	206.196	220.408		134.93	144.23
		335.25	201.952	220.66		132.153	144.395
		335.5	197.366	219.166		129.152	143.417
		335.75	193.355	219.922		126.527	143.912
		336	188.818	219.91		123.559	143.904
		336.25	183.062	219.399		119.792	143.57
		336.5	178.957	218.936		117.106	143.267
		336.75	173.688	219.686		113.657	143.757
		337	169.128	219.692		110.674	143.761
		337.25	164.343	218.16		107.542	142.759
		337.5	160.842	218.118		105.252	142.732
		337.75	156.087	218.561		102.14	143.022
		338	152.983	216.97		100.109	141.98
		338.25	150.229	216.955		98.3067	141.971
		338.5	146.75	216.925		96.0301	141.951
		338.75	144.419	215.329		94.5048	140.906
		339	141.519	212.575		92.6071	139.105
		339.25	139.142	211.505		91.0517	138.405
		339.5	136.398	208.649		89.2559	136.535
		339.75	134.274	208.207		87.8657	136.246
		340	133.056	206.095		87.0691	134.864
		340.25	130.379	203.85		85.317	133.395
		340.5	129.203	200.842		84.5474	131.427
		340.75	126.687	198.698		82.9011	130.024
		341	125.713	195.271		82.2639	127.781
		341.25	123.806	193.639		81.0158	126.713
		341.5	122.579	189.684		80.2133	124.125
		341.75	120.693	186.951		78.9788	122.337
		342	119.449	184.543		78.1646	120.761
		342.25	118.116	182.216		77.2926	119.238
		342.5	116.666	178.048		76.3439	116.511
		342.75	115.603	176.097		75.648	115.234
		343	114.681	174.051		75.0448	113.895
		343.25	113.178	171.121		74.0613	111.978
		343.5	111.859	168.931		73.1977	110.545
		343.75	110.288	166.767		72.1697	109.129
		344	110.012	165.398		71.9891	108.233
		344.25	108.35	161.522		70.9019	105.696
		344.5	107.835	160.059		70.5647	104.739
		344.75	106.508	158.388		69.6965	103.645
		345	105.552	156.16		69.0706	102.187
		345.25	104.459	154.604		68.3555	101.169
		345.5	103.764	151.54		67.9011	99.1647
		345.75	102.781	150.467		67.2578	98.4623
		346	102.038	148.563		66.7715	97.2161
		346.25	101.373	146.321		66.3361	95.7493
		346.5	100.254	144.673		65.6041	94.6705
		346.75	99.4853	144.13		65.101	94.3157
		347	98.5648	142.186		64.4986	93.0435
		347.25	97.6889	140.549		63.9254	91.9719
		347.5	97.0649	138.767		63.5171	90.8059
		347.75	96.004	137.072		62.8229	89.697
		348	95.7471	135.988		62.6548	88.9873
		348.25	94.3566	134.748		61.7449	88.1759
		348.5	93.8816	133.459		61.4341	87.3324
		348.75	93.7408	132.23		61.3419	86.5285
		349	92.7678	130.296		60.7052	85.2628
		349.25	92.1795	129.974		60.3202	85.0524
		349.5	91.2368	127.936		59.7033	83.7182
		349.75	90.6221	126.711		59.3011	82.9169
		350	90.0602	125.67		58.9334	82.2353
		350.25	89.7341	124.948		58.72	81.7634
		350.5	89.1263	123.88		58.3223	81.0643
		350.75	88.4617	122.908		57.8874	80.4281
		351	87.7011	121.212		57.3897	79.3186
		351.25	87.0609	120.826		56.9707	79.066
		351.5	86.6587	120.025		56.7075	78.5415
		351.75	86.2836	117.725		56.4621	77.0365
		352	85.3032	116.983		55.8205	76.5511
		352.25	85.1814	117.182		55.7408	76.6814
		352.5	84.6423	116.365		55.388	76.1469
		352.75	83.8201	114.768		54.85	75.1019
		353	83.2374	113.983		54.4687	74.5881
		353.25	83.0973	113.631		54.377	74.3579
		353.5	82.2587	112.25		53.8283	73.4542
		353.75	81.6652	111.33		53.4399	72.8518
		354	81.3557	110.591		53.2374	72.3685
		354.25	80.6352	109.939		52.7659	71.9416
		354.5	80.0615	108.387		52.3905	70.9258
		354.75	79.8823	108.248		52.2732	70.835
		355	79.4903	107.247		52.0167	70.1803
		355.25	79.1302	106.454		51.781	69.6608
		355.5	78.5285	105.849		51.3873	69.2652
		355.75	78.3248	105.586		51.254	69.0935
		356	77.4786	104.101		50.7003	68.1211
		356.25	76.8306	102.915		50.2762	67.3455
		356.5	76.7741	102.593		50.2393	67.1346
		356.75	76.8317	101.695		50.2769	66.5469
		357	75.9764	101.71		49.7173	66.557
		357.25	75.2	100.311		49.2092	65.6416
		357.5	75.0063	100.151		49.0824	65.5363
		357.75	74.6751	99.1968		48.8657	64.9122
		358	74.4731	98.613		48.7335	64.5302
		358.25	73.5892	97.2551		48.1551	63.6416
		358.5	73.5087	96.8632		48.1025	63.3851
		358.75	72.9115	95.9705		47.7116	62.801
		359	72.8223	95.6658		47.6533	62.6016
		359.25	72.2527	95.1449		47.2806	62.2607
		359.5	72.0288	94.5346		47.1341	61.8613
		359.75	71.5381	93.7477		46.813	61.3464
		360	71.0534	93.0692		46.4958	60.9024
		360.25	70.8359	92.412		46.3535	60.4724
		360.5	70.6815	91.6593		46.2524	59.9798
		360.75	70.2421	92.1767		45.9649	60.3184
		361	69.9688	91.0468		45.786	59.579
		361.25	69.4877	90.6704		45.4712	59.3327
		361.5	69.1814	89.445		45.2708	58.5308
		361.75	68.7582	89.3451		44.9938	58.4655
		362	68.4989	88.6749		44.8241	58.0269
		362.25	68.302	88.8262		44.6953	58.1259
		362.5	67.7495	87.9453		44.3338	57.5494
		362.75	67.635	87.2444		44.2588	57.0908
		363	67.4375	86.534		44.1296	56.6259
		363.25	66.3878	86.4189		43.4427	56.5506
		363.5	67.0257	85.7916		43.8601	56.1401
		363.75	66.404	85.2748		43.4533	55.802
		364	65.5797	84.47		42.9139	55.2753
		364.25	65.2821	83.544		42.7192	54.6694
		364.5	65.4251	83.1832		42.8127	54.4333
		364.75	64.4682	83.147		42.1866	54.4096
		365	64.5389	82.7982		42.2328	54.1813
		365.25	64.6059	82.4462		42.2767	53.951
		365.5	63.5659	81.1772		41.5961	53.1205
		365.75	63.8529	81.0252		41.7839	53.0211
		366	63.4431	80.5391		41.5157	52.703
		366.25	63.021	80.3553		41.2395	52.5827
		366.5	62.8972	79.1635		41.1585	51.8028
		366.75	62.5643	79.0886		40.9407	51.7538
		367	62.0233	78.7086		40.5867	51.5052
		367.25	62.5082	78.6663		40.904	51.4775
		367.5	61.7096	77.9303		40.3814	50.9958
		367.75	61.263	77.2245		40.0892	50.534
		368	61.0226	77.0574		39.9319	50.4246
		368.25	61.1352	76.217		40.0055	49.8747
		368.5	60.5057	75.9851		39.5936	49.7229
		368.75	60.1952	76.2938		39.3904	49.9249
		369	60.1602	75.2363		39.3675	49.233
		369.25	60.3389	75.215		39.4844	49.219
		369.5	59.6514	74.0235		39.0345	48.4393
		369.75	59.3361	74.0203		38.8282	48.4372
		370	59.2593	73.8216		38.778	48.3072
		370.25	58.9785	73.1253		38.5942	47.8516
		370.5	58.7331	72.6633		38.4336	47.5493
		370.75	58.4929	72.2966		38.2764	47.3093
		371	58.388	72.1422		38.2078	47.2083
		371.25	58.0531	71.7656		37.9887	46.9618
		371.5	57.5741	71.1241		37.6752	46.5421
		371.75	57.4749	70.6381		37.6103	46.224
		372	57.163	69.9495		37.4062	45.7734
		372.25	56.9217	70.3056		37.2483	46.0064
		372.5	56.6671	69.6648		37.0817	45.5871
		372.75	56.5295	69.1292		36.9916	45.2366
		373	56.1215	68.9857		36.7247	45.1427
		373.25	56.1825	68.5283		36.7646	44.8434
		373.5	56.0409	67.9185		36.6719	44.4443
		373.75	55.9981	68.1783		36.6439	44.6143
		374	55.7226	67.576		36.4637	44.2202
		374.25	55.3173	67.4615		36.1984	44.1453
		374.5	55.0406	66.8649		36.0174	43.7549
		374.75	54.8603	66.0909		35.8994	43.2484
		375	54.745	66.0728		35.8239	43.2366
		375.25	54.3026	65.5285		35.5344	42.8804
		375.5	53.961	65.7641		35.3109	43.0346
		375.75	54.0072	65.5351		35.3411	42.8847
		376	53.895	64.6662		35.2677	42.3162
		376.25	53.5391	64.7419		35.0348	42.3657
		376.5	53.3796	64.3801		34.9304	42.1289
		376.75	53.3552	64.0747		34.9144	41.9291
		377	52.8833	63.7909		34.6056	41.7433
		377.25	52.699	63.5357		34.485	41.5764
		377.5	52.6467	63.0966		34.4509	41.289
		377.75	52.3382	62.9095		34.249	41.1666
		378	52.1277	62.3556		34.1112	40.8041
		378.25	52.0158	62.7319		34.038	41.0504
		378.5	51.6238	61.7781		33.7815	40.4262
		378.75	51.4746	61.3523		33.6838	40.1476
		379	51.3532	61.0364		33.6044	39.9409
		379.25	51.124	61.2631		33.4544	40.0892
		379.5	51.2785	60.79		33.5555	39.7796
		379.75	50.691	60.8015		33.1711	39.7871
		380	50.4584	60.4044		33.0188	39.5273
		380.25	50.1212	59.7189		32.7982	39.0787
		380.5	50.1332	59.5605		32.806	38.9751
		380.75	49.8626	59.041		32.629	38.6351
		381	49.6221	58.9341		32.4716	38.5652
		381.25	49.6562	58.6951		32.4939	38.4088
		381.5	49.5429	58.5083		32.4198	38.2865
		381.75	49.2102	58.2273		32.2021	38.1027
		382	48.9314	57.6139		32.0196	37.7013
		382.25	48.8473	57.4427		31.9646	37.5892
		382.5	48.6408	57.5962		31.8295	37.6897
		382.75	48.4728	57.4359		31.7196	37.5848
		383	48.1925	57.203		31.5361	37.4324
		383.25	48.2735	56.5009		31.5891	36.973
		383.5	48.194	56.4022		31.5371	36.9083
		383.75	47.9201	56.3914		31.3578	36.9013
		384	47.7944	55.8506		31.2756	36.5474
		384.25	47.5745	56.0417		31.1317	36.6724
		384.5	47.4197	55.5815		31.0304	36.3713
		384.75	47.1644	55.3013		30.8633	36.1879
		385	46.8234	55.3396		30.6402	36.213
		385.25	47.1062	54.916		30.8253	35.9358
		385.5	46.7255	54.1892		30.5761	35.4602
		385.75	46.5141	53.9557		30.4378	35.3074
		386	46.3796	54.1188		30.3498	35.4141
		386.25	46.5133	53.8632		30.4373	35.2469
		386.5	46.4027	53.7286		30.3649	35.1588
		386.75	45.8741	53.273		30.019	34.8607
		387	45.8228	53.4533		29.9854	34.9786
		387.25	45.6562	52.8701		29.8764	34.597
		387.5	45.5845	52.7024		29.8295	34.4873
		387.75	45.3623	52.2418		29.6841	34.1859
		388	45.352	52.2962		29.6773	34.2215
		388.25	45.0522	52.0604		29.4811	34.0671
		388.5	45.0576	52.2674		29.4847	34.2026
		388.75	45.1724	51.5408		29.5598	33.7272
		389	44.8328	51.7207		29.3376	33.8449
		389.25	44.5968	51.448		29.1831	33.6664
		389.5	44.3261	50.8273		29.006	33.2603
		389.75	43.8722	50.6592		28.709	33.1502
		390	43.5268	50.4937		28.483	33.042
		390.25	43.5428	50.4093		28.4934	32.9867
		390.5	43.1647	50.2356		28.246	32.873
		390.75	42.8031	49.6876		28.0094	32.5145
		391	42.997	49.765		28.1363	32.5651
		391.25	42.724	49.4285		27.9577	32.3449
		391.5	42.7371	49.4285		27.9662	32.3449
		391.75	42.3351	48.9644		27.7031	32.0412
		392	42.4311	49.1565		27.766	32.1669
		392.25	42.0456	48.8953		27.5137	31.996
		392.5	41.9825	49.1853		27.4724	32.1857
		392.75	42.0437	48.6777		27.5125	31.8536
		393	41.9735	48.477		27.4665	31.7222
		393.25	41.8572	48.0558		27.3904	31.4467
		393.5	41.464	48.1456		27.1331	31.5054
		393.75	41.3533	47.9597		27.0607	31.3838
		394	41.2714	47.6034		27.0071	31.1506
		394.25	41.2511	47.4357		26.9938	31.0409
		394.5	40.935	47.3299		26.787	30.9716
		394.75	40.8859	47.0265		26.7548	30.7731
		395	40.8469	46.9271		26.7293	30.7081
		395.25	40.6536	46.5871		26.6028	30.4855
		395.5	40.36	46.5645		26.4107	30.4708
		395.75	40.4891	46.3817		26.4952	30.3511
		396	40.3762	46.2498		26.4213	30.2649
		396.25	40.327	46.0373		26.3891	30.1258
		396.5	40.1276	45.7776		26.2586	29.9559
		396.75	40.0892	45.877		26.2335	30.0209
		397	39.9631	45.4032		26.1509	29.7109
		397.25	39.8169	44.9062		26.0553	29.3856
		397.5	39.5179	45.0259		25.8597	29.4639
		397.75	39.4568	44.7158		25.8196	29.2611
		398	39.3164	44.5737		25.7278	29.168
		398.25	38.9382	44.7853		25.4803	29.3065
		398.5	39.0466	44.5262		25.5512	29.1369
		398.75	38.8561	44.4536		25.4266	29.0895
		399	38.8302	43.7107		25.4096	28.6033
		399.25	38.747	44.0378		25.3552	28.8174
		399.5	38.6537	43.7328		25.2942	28.6178
		399.75	38.4224	43.5486		25.1427	28.4973
		400	38.3841	43.526		25.1177	28.4824
		400.25	38.2165	43.0587		25.008	28.1766
		400.5	38.2016	43.1888		24.9983	28.2618
		400.75	38.1588	43.2067		24.9703	28.2735
		401	38.0246	42.7586		24.8825	27.9803
		401.25	37.9133	42.5982		24.8096	27.8753
		401.5	38.0074	43.0099		24.8712	28.1447
		401.75	37.6879	42.3476		24.6621	27.7113
		402	37.4695	42.3509		24.5192	27.7135
		402.25	37.615	42.6125		24.6144	27.8847
		402.5	37.2166	42.1197		24.3537	27.5622
		402.75	37.0973	41.829		24.2757	27.3719
		403	37.1258	41.7942		24.2943	27.3492
		403.25	36.9459	41.5354		24.1766	27.1799
		403.5	37.088	41.2633		24.2696	27.0018
		403.75	36.954	41.2016		24.1819	26.9614
		404	36.939	41.1602		24.1721	26.9343
		404.25	36.8176	40.7935		24.0926	26.6944
		404.5	36.6378	40.7998		23.975	26.6985
		404.75	36.4261	40.474		23.8364	26.4853
		405	36.4725	40.6568		23.8668	26.6049
		405.25	36.2478	40.3901		23.7198	26.4304
		405.5	36.5591	40.4721		23.9234	26.4841
		405.75	36.2661	40.3901		23.7317	26.4304
		406	36.3117	40.0806		23.7616	26.2279
		406.25	35.8398	39.8312		23.4528	26.0647
		406.5	35.8466	39.6768		23.4572	25.9636
		406.75	35.889	39.6694		23.485	25.9588
		407	35.6465	39.5167		23.3263	25.8589
		407.25	35.8088	39.601		23.4325	25.914
		407.5	35.6887	39.4289		23.3539	25.8014
		407.75	35.4585	39.4682		23.2033	25.8271
		408	35.6882	39.0123		23.3535	25.5288
		408.25	35.155	38.9436		23.0047	25.4838
		408.5	35.1372	38.7363		22.993	25.3482
		408.75	35.1367	38.7853		22.9927	25.3802
		409	35.1189	38.4085		22.981	25.1336
		409.25	35.1595	38.3317		23.0076	25.0834
		409.5	34.8563	38.1999		22.8092	24.9972
		409.75	34.8216	38.2544		22.7865	25.0328
		410	34.7185	38.2065		22.719	25.0015
		410.25	34.4037	37.7164		22.513	24.6808
		410.5	34.5861	37.6425		22.6324	24.6324
		410.75	34.5773	37.714		22.6266	24.6792
		411	34.5416	37.6904		22.6033	24.6637
		411.25	34.5219	37.5551		22.5904	24.5753
		411.5	34.1417	37.3774		22.3416	24.459
		411.75	34.2984	37.5157		22.4441	24.5494
		412	33.7666	37.5634		22.0961	24.5807
		412.25	34.0122	36.9961		22.2568	24.2094
		412.5	33.9846	37.0299		22.2387	24.2315
		412.75	33.6006	36.8339		21.9875	24.1033
		413	33.7779	36.8879		22.1035	24.1386
		413.25	33.7273	36.8925		22.0704	24.1416
		413.5	33.673	36.4013		22.0349	23.8202
		413.75	33.5803	36.2503		21.9742	23.7214
		414	33.3734	36.7179		21.8388	24.0274
		414.25	33.3948	36.0087		21.8528	23.5633
		414.5	33.2499	35.9904		21.758	23.5513
		414.75	33.1639	36.056		21.7017	23.5942
		415	33.3026	35.9193		21.7925	23.5048
		415.25	33.2165	35.8937		21.7361	23.488
		415.5	33.2436	35.6348		21.7539	23.3186
		415.75	33.1427	35.6184		21.6879	23.3079
		416	32.8622	35.4633		21.5043	23.2064
		416.25	32.9629	35.0946		21.5702	22.9651
		416.5	32.7402	35.3369		21.4245	23.1237
		416.75	32.5616	35.1303		21.3076	22.9885
		417	32.5136	35.1141		21.2762	22.9779
		417.25	32.5935	34.9119		21.3285	22.8456
		417.5	32.4687	34.888		21.2468	22.83
		417.75	32.35	35.0032		21.1691	22.9053
		418	32.3401	34.672		21.1627	22.6886
		418.25	32.3297	34.2891		21.1559	22.438
		418.5	32.0579	34.3406		20.9779	22.4717
		418.75	31.7223	34.5181		20.7583	22.5879
		419	31.566	34.0314		20.6561	22.2694
		419.25	31.3291	34.1333		20.5011	22.3361
		419.5	30.9384	33.6601		20.2454	22.0264
		419.75	30.8508	33.8424		20.1881	22.1457
		420	30.7903	33.7368		20.1485	22.0766
		420.25	30.5248	33.8218		19.9748	22.1322
		420.5	30.6795	33.6855		20.076	22.043
		420.75	30.2958	33.7363		19.8249	22.0763
		421	30.3832	33.3055		19.8821	21.7944
		421.25	30.3812	33.3532		19.8808	21.8256
		421.5	30.1727	33.4615		19.7443	21.8965
		421.75	30.1579	33.4535		19.7347	21.8912
		422	30.2125	33.1357		19.7704	21.6833
		422.25	30.0073	32.8628		19.6361	21.5047
		422.5	30.2061	32.6996		19.7662	21.3979
		422.75	30.1515	32.8215		19.7305	21.4777
		423	29.9535	32.8882		19.6009	21.5213
		423.25	29.7186	32.8527		19.4472	21.4981
		423.5	29.7352	32.5349		19.458	21.2901
		423.75	29.5892	32.5134		19.3625	21.276
		424	29.7463	32.6053		19.4653	21.3362
		424.25	29.7318	32.6469		19.4558	21.3634
		424.5	29.5128	32.3118		19.3125	21.1442
		424.75	29.4524	32.5822		19.273	21.3211
		425	29.6303	32.3458		19.3894	21.1664
		425.25	29.5384	32.4489		19.3293	21.2338
		425.5	29.5514	32.3129		19.3378	21.1448
		425.75	29.2984	31.9288		19.1722	20.8935
		426	29.2883	31.9821		19.1656	20.9284
		426.25	29.3354	31.8405		19.1964	20.8357
		426.5	29.3181	32.1233		19.1851	21.0207
		426.75	29.2614	31.7369		19.148	20.7679
		427	29.201	31.6813		19.1085	20.7316
		427.25	29.0233	31.5141		18.9922	20.6221
		427.5	29.3797	31.6654		19.2254	20.7211
		427.75	29.1297	31.6716		19.0618	20.7252
		428	28.9414	31.4747		18.9386	20.5964
		428.25	28.701	31.393		18.7813	20.5429
		428.5	29.0037	31.1301		18.9794	20.3708
		428.75	28.8046	31.3502		18.8491	20.5149
		429	28.8269	31.047		18.8637	20.3165
		429.25	28.7937	31.2351		18.842	20.4396
		429.5	28.7015	31.1458		18.7816	20.3811
		429.75	28.4467	30.9521		18.6149	20.2543
		430	28.5722	30.6961		18.697	20.0868
		430.25	28.6495	30.7633		18.7476	20.1308
		430.5	28.6675	30.623		18.7594	20.039
		430.75	28.5064	30.536		18.6539	19.9821
		431	28.2941	30.3885		18.515	19.8856
		431.25	28.2343	30.1808		18.4759	19.7496
		431.5	28.4373	30.6375		18.6088	20.0485
[truncated: 322 more rows]

## Sheet: Fig 4B
	Time, Min	OCR			adjusted time	Time (hrs)	Ch 1, Lactate, umol/ million cells/min	Ch 2, Lactate, umol/ million cells/min	Ch 1, Pyruvate, nmol /million cells/min	Ch 2 Pyruvate, nmol /million cells/min	Lactate, umol/ million cells/min	SE	Pyruvate, nmol /million cells/min	SE	[lactate]/[pyruvate]			-36	Day 1 (12/12/19)		Day 2 (01/02/20)	Day 3 02/04/20		Day 4 03/13/20
	-35.5	1.58522			-15	-0.25	0.3161	0.2385	0.046331	0.048132	0.2773	0.0388	0.0472315	0.0009005	5.87108				CytC						Average
	-35.25	1.58627			-10	-0.166667	0.2687	0.191	0.050518	0.046828	0.22985	0.03885	0.048673	0.001845	4.72233				C1	C2	C3	C2	C4	Rush 1	Cyt C	SE
	-35	1.5866			-5	-0.0833333	0.2996	0.2218	0.051122	0.048275	0.2607	0.0389	0.0496985	0.0014235	5.24563			-15	63.2772	44.1425	56.4312	59.1685	72.053	31.4806	54.4256	5.90995
	-34.75	1.59407			0	0	0.3259	0.2482	0.047028	0.041255	0.28705	0.03885	0.0441415	0.0028865	6.50295			-14.5	63.0672	43.1812	57.312	53.7159	71.537	30.6026	53.236	5.9492
	-34.5	1.59198			10	0.166667	0.4351	0.384	0.057151	0.060266	0.40955	0.02555	0.0587085	0.0015575	6.97599			-14	62.6585	44.0153	56.6748	46.4116	71.577	30.9055	52.0405	5.94048
	-34.25	1.59212			20	0.333333	0.6738	0.5574	0.060244	0.063362	0.6156	0.0582	0.061803	0.001559	9.96068			-13.5	62.7424	43.4602	55.8734	39.2914	71.577	29.6318	50.4294	6.41256
	-34	1.59314			30	0.5	0.8816	0.7654	0.071001	0.074128	0.8235	0.0581	0.0725645	0.0015635	11.3485			-13	62.6926	44.3687	55.3228	30.6121	71.706	29.1602	48.9771	7.06213
	-33.75	1.59601			40	0.666667	1.0869	0.9709	0.075027	0.07815	1.0289	0.058	0.0765885	0.0015615	13.4341			-12.5	62.9511	44.8027	55.3204	21.4505	71.479	29.7238	47.6213	7.90917
	-33.5	1.59882			50	0.833333	1.1946	1.0786	0.077717	0.075363	1.1366	0.058	0.07654	0.001177	14.8498			-12	62.3782	44.7789	54.941	20.8366	71.282	29.7814	47.3331	7.90455
	-33.25	1.60301			60	1	1.1798	1.0639	0.083132	0.080798	1.12185	0.05795	0.081965	0.001167	13.6869			-11.5	62.1562	44.7526	53.0959	20.2154	71.562	29.5182	46.8834	7.9544
	-33	1.6031			70	1.16667	1.2549	1.0862	0.083314	0.08098	1.17055	0.08435	0.08098	0.001167	14.4548			-11	62.0141	44.1835	52.9303	20.1713	71.603	30.1296	46.8386	7.91217
	-32.75	1.60303			80	1.33333	1.211	1.0155	0.082857	0.080527	1.11325	0.09775	0.081692	0.001165	13.6274			-10.5	62.1967	43.2925	53.0662	21.3861	71.513	30.7001	47.0258	7.75486
	-32.5	1.60582			90	1.5	1.2042	1.0088	0.083314	0.08098	1.1065	0.0977	0.082147	0.001167	13.4698			-10	62.2343	42.6945	53.4494	21.8137	71.295	30.7031	47.0317	7.70798
	-32.25	1.60248			100	1.66667	1.2452	1.0497	0.079583	0.077239	1.14745	0.09775	0.078411	0.001172	14.6338			-9.5	62.4478	41.9146	50.8173	23.0979	71.26	30.7086	46.7077	7.53622
	-32	1.60561			110	1.83333	1.157	0.9616	0.079082	0.076737	1.0593	0.0977	0.0779095	0.0011725	13.5965			-9	62.3451	40.9417	48.4622	22.9452	71.38	30.8465	46.1535	7.53652
	-31.75	1.60592			120	2	1.1508	1.1538	0.070588	0.068201	1.1523	0.0015	0.0693945	0.0011935	16.6051			-8.5	61.8717	40.8404	47.9431	21.3351	70.98	31.5078	45.7463	7.58135
	-31.5	1.60142			130	2.16667	1.043	1.0458	0.06995	0.071238	1.0444	0.0014	0.070594	0.000644	14.7945			-8	61.7386	41.3079	47.6655	19.3207	70.623	30.047	45.1171	7.83235
	-31.25	1.60068			140	2.33333	1.0564	1.0593	0.065816	0.06857	1.05785	0.00145	0.067193	0.001377	15.7435			-7.5	62.207	39.7456	44.4215	19.3571	70.572	30.4606	44.4605	7.84247
	-31	1.59352			150	2.5	0.8407	0.843	0.061904	0.065853	0.84185	0.00115	0.0638785	0.0019745	13.1789			-7	62.232	40.4679	41.7314	19.2023	70.395	30.5997	44.1047	7.83401
	-30.75	1.59518			160	2.66667	0.7194	0.8004	0.057519	0.060635	0.7599	0.0405	0.059077	0.001558	12.8629			-6.5	62.4906	40.7683	39.9181	20.2532	70.324	31.0324	44.1311	7.7329
	-30.5	1.5951			170	2.83333	0.5048	0.585	0.050612	0.056604	0.5449	0.0401	0.053608	0.002996	10.1645			-6	61.9734	39.7589	40.1932	24.0595	70.128	30.8078	44.4868	7.32218
	-30.25	1.58936			180	3	0.4551	0.5351	0.051216	0.055166	0.4951	0.04	0.053191	0.001975	9.30797			-5.5	62.4783	38.665	39.1726	23.8805	70.408	30.7234	44.2213	7.46402
	-30	1.59065			190	3.16667	0.4314	0.5113	0.051495	0.05461	0.47135	0.03995	0.0530525	0.0015575	8.8846			-5	62.5059	38.8685	36.5775	25.4968	70.402	31.4525	44.2171	7.34954
	-29.75	1.59031			200	3.33333	0.3671	0.4468	0.048005	0.054005	0.40695	0.03985	0.051005	0.003	7.97863			-4.5	62.2307	38.3477	36.3924	28.9473	69.844	31.4546	44.5362	7.0056
	-29.5	1.58922			210	3.5	0.4051	0.4849	0.051216	0.050234	0.445	0.0399	0.050725	0.000491	8.77279			-4	62.1614	37.8005	36.1892	30.2263	69.45	31.3659	44.5323	6.89114
	-29.25	1.5893			220	3.66667	0.3541	0.4337	0.047401	0.046404	0.3939	0.0398	0.0469025	0.0004985	8.39827			-3.5	62.3751	38.031	37.4986	28.1595	69.255	31.4811	44.4668	6.97547
	-29	1.59301			230	3.83333	0.3494	0.429	0.047028	0.04603	0.3892	0.0398	0.046529	0.000499	8.36468			-3	62.2939	37.8235	35.5565	25.0661	69.085	31.7102	43.5892	7.26154
	-28.75	1.59212			240	4	0.4377	0.5176	0.052006	0.051027	0.47765	0.03995	0.0515165	0.0004895	9.27179			-2.5	62.1871	36.9503	36.832	24.7167	68.284	31.5261	43.416	7.18087
	-28.5	1.59095																-2	62.3875	37.4843	36.8682	24.6759	67.911	31.6605	43.4979	7.13516
	-28.25	1.59097																-1.5	62.4693	37.2832	38.55	23.3983	67.688	31.2226	43.4352	7.21766
	-28	1.59172																-1	62.0964	37.9609	37.349	24.7743	67.761	31.0205	43.4937	7.09304
	-27.75	1.59924																-0.5	61.9789	36.3908	37.0761	24.5652	67.43	30.702	43.0238	7.13415
	-27.5	1.59708																0	61.7992	36.2221	35.3835	22.1254	67.511	30.833	42.3124	7.39172
	-27.25	1.59783																0.5	62.5178	37.0555	32.3137	23.6272	67.908	30.2463	42.2781	7.49605
	-27	1.60124																1	62.7454	38.5452	35.2857	25.7285	68.46	29.6574	43.4036	7.28649
	-26.75	1.601																1.5	63.4934	38.3764	35.4038	25.5697	69.838	29.578	43.7099	7.52834
	-26.5	1.60496																2	64.8806	39.2328	38.6819	25.833	71.191	29.6762	44.9159	7.65188
	-26.25	1.60638																2.5	65.888	39.0605	41.1632	26.799	72.939	29.9786	45.9714	7.78498
	-26	1.60982																3	66.544	39.1587	43.9765	30.5947	74.365	30.1209	47.4599	7.64676
	-25.75	1.60811																3.5	67.57	38.6335	42.7291	32.9098	76.098	30.8749	48.1359	7.76501
	-25.5	1.60334																4	68.987	39.889	42.2529	32.7426	77.241	31.4388	48.7585	7.95383
	-25.25	1.60242																4.5	70.542	39.9305	39.0411	32.6065	78.395	32.584	48.8498	8.26165
	-25	1.60372																5	71.9694	41.0926	34.786	34.1495	79.393	33.6899	49.1802	8.5062
	-24.75	1.6004																5.5	73.9675	41.833	31.8684	36.2144	79.955	35.4726	49.8851	8.69517
	-24.5	1.59677																6	75.7529	42.8139	31.1554	36.8996	80.776	37.5887	50.8311	8.8292
	-24.25	1.594																6.5	77.5853	42.5982	35.653	37.0041	81.478	40.4807	52.4665	8.63214
	-24	1.58976																7	79.0261	42.4671	35.8507	36.8153	82.548	42.7517	53.2431	8.79789
	-23.75	1.58747																7.5	80.2894	43.1546	38.3661	37.1915	83.214	45.0746	54.5484	8.69298
	-23.5	1.59057																8	81.277	44.0178	41.8424	36.5824	83.674	46.9843	55.7297	8.5765
	-23.25	1.58992																8.5	82.3787	43.7412	43.6838	37.8026	84.555	48.1752	56.7227	8.56819
	-23	1.588																9	83.189	45.4841	45.2487	36.7984	85.006	50.3866	57.6854	8.54384
	-22.75	1.58509																9.5	84.4288	46.5297	43.5176	34.4854	85.648	51.8781	57.7479	8.93348
	-22.5	1.58868																10	85.3406	46.8987	42.4328	35.4971	85.84	53.3287	58.2231	8.97418
	-22.25	1.59355																10.5	85.9931	46.2446	40.4945	35.5815	86.046	55.0256	58.2309	9.17596
	-22	1.59315																11	87.0875	47.8903	38.109	34.5969	86.257	57.3424	58.5472	9.46705
	-21.75	1.59689																11.5	87.7891	48.8197	36.0953	33.1323	86.567	58.0169	58.4033	9.80639
	-21.5	1.59443																12	88.6322	50.3228	36.5398	33.0648	87.024	59.3594	59.1571	9.85859
	-21.25	1.59336																12.5	89.3517	51.5897	39.3161	35.4865	87.186	60.8164	60.6244	9.48401
	-21	1.5895																13	89.8911	53.0193	39.9089	37.5841	87.719	63.0748	61.8662	9.31882
	-20.75	1.59177																13.5	90.5323	55.3893	43.4048	38.582	87.96	64.3742	63.3738	8.98186
	-20.5	1.58822																14	91.4832	54.7904	45.5417	38.1377	88.542	65.7057	64.0334	9.046
	-20.25	1.58444																14.5	92.4197	55.6315	48.5638	42.3348	89.001	67.6926	65.9405	8.56629
	-20	1.58292																15	92.731	57.8342	49.0743	46.0826	89.329	68.3691	67.2367	8.17537
	-19.75	1.58441																15.5	93.4872	58.4992	48.8274	46.9337	89.455	68.8885	67.6818	8.18889
	-19.5	1.58022																16	93.9998	59.032	50.3887	44.4417	89.577	69.9432	67.897	8.34832
	-19.25	1.58007																16.5	94.6102	60.4682	50.827	44.8136	89.871	70.4821	68.5121	8.32727
	-19	1.57903																17	95.1941	60.9908	51.4539	45.3164	89.795	71.3962	69.0243	8.28091
	-18.75	1.58363																17.5	94.9156	61.5917	50.1502	45.9459	89.572	72.5412	69.1194	8.26431
	-18.5	1.58415																18	95.3257	60.3398	50.4073	43.9181	89.844	73.2031	68.8397	8.55343
	-18.25	1.58618																18.5	95.2099	60.8596	50.2823	47.0232	90.053	72.7811	69.3682	8.25285
	-18	1.58758																19	95.3626	61.1253	50.2566	50.2862	90.277	73.3127	70.1035	8.0053
	-17.75	1.58895																19.5	95.3919	60.6625	52.5858	49.1833	90.739	74.2367	70.4665	7.99015
	-17.5	1.5917																20	95.2483	60.8513	52.4927	51.0324	91.005	73.7043	70.7224	7.82998
	-17.25	1.59485																20.5	95.4512	62.3651	56.2173	50.3603	91.704	74.4551	71.7588	7.64654
	-17	1.59592																21	95.2756	61.8344	56.9586	49.8181	91.7	74.4559	71.6738	7.65258
	-16.75	1.59662																21.5	95.4596	61.9186	58.5392	46.5907	91.91	76.4592	71.8128	7.9475
	-16.5	1.5943																22	95.5706	62.5947	58.8462	47.7549	92.357	76.7288	72.3086	7.83382
	-16.25	1.59173																22.5	95.5105	62.8043	57.298	52.7865	92.541	76.7435	72.9473	7.44237
	-16	1.58986																23	95.5023	63.377	59.0884	55.9819	93.039	78.7011	74.2816	7.08591
	-15.75	1.59167																23.5	95.6264	64.6812	58.1185	53.7718	93.207	78.5	73.9841	7.31459
	-15.5	1.58539																24	95.9794	64.7111	59.9993	54.8207	93.627	79.4196	74.7596	7.17491
	-15.25	1.58222																24.5	96.0314	65.0632	60.2873	58.1412	94.125	80.2299	75.6463	6.90976
	-15	1.58328																25	95.9986	63.5094	61.5083	60.9644	94.132	80.3316	76.074	6.68216
	-14.75	1.58319																25.5	96.2002	63.6031	62.629	60.4447	94.224	80.3536	76.2425	6.66635
	-14.5	1.58136																26	96.3713	63.0943	62.4815	58.9287	94.113	80.6722	75.9435	6.84496
	-14.25	1.57872																26.5	96.8752	62.8565	62.9231	61.889	94.088	80.8289	76.5768	6.65116
	-14	1.58069																27	96.7968	63.7825	59.3307	65.2346	94.039	80.7493	76.6554	6.63552
	-13.75	1.58354																27.5	97.1012	64.5865	58.7419	64.5643	93.943	80.9237	76.6434	6.70289
	-13.5	1.5798																28	96.9599	64.146	58.1458	62.5378	94.238	81.8442	76.3119	6.94268
	-13.25	1.58259																28.5	96.8361	63.8604	57.6488	62.3761	94.489	82.8906	76.3502	7.0533
	-13	1.58457																29	96.87	64.5406	57.3118	62.3059	94.798	81.6549	76.2469	7.04421
	-12.75	1.58142																29.5	97.0502	64.146	56.7254	62.7048	94.687	82.7394	76.3421	7.13166
	-12.5	1.58317																30	97.3691	64.4615	57.745	63.0057	94.636	83.6603	76.813	7.05668
	-12.25	1.58267																30.5	97.4093	63.8234	59.0422	66.1388	94.527	83.7743	77.4525	6.78841
	-12	1.58389																31	97.7548	65.0429	59.5567	66.8463	94.652	83.2635	77.8527	6.65223
	-11.75	1.58535																31.5	97.8648	65.4215	60.1264	66.3476	94.629	84.0536	78.0738	6.63626
	-11.5	1.58824																32	98.1313	65.2966	60.3227	68.7658	94.757	85.2947	78.7613	6.56997
	-11.25	1.5911																32.5	98.3025	65.7692	60.8419	70.9314	95.016	85.3933	79.3757	6.42648
	-11	1.5929																33	98.1535	65.9337	62.7471	69.2697	95.092	85.67	79.4777	6.32063
	-10.75	1.58808																33.5	97.9113	65.3311	63.7842	67.3857	95.354	85.3099	79.1793	6.3717
	-10.5	1.59136																34	97.6831	65.6699	64.1134	68.2251	95.491	85.9879	79.5284	6.28108
	-10.25	1.59059																34.5	98.2228	66.8445	64.2258	69.8021	95.528	85.8878	80.0852	6.14739
	-10	1.59322																35	98.3655	66.4061	64.4665	71.0301	95.42	85.7591	80.2412	6.09485
	-9.75	1.59365																35.5	98.3466	67.0875	64.3791	69.8434	95.427	85.3801	80.0772	6.10298
	-9.5	1.58999																36	98.4701	67.4833	64.6884	71.3971	95.782	85.2669	80.5147	6.00418
	-9.25	1.58925																36.5	98.3513	67.9961	62.6446	74.2544	95.981	86.0287	80.876	6.0614
	-9	1.58532																37	98.4738	68.9382	62.0824	72.9002	96.041	86.0804	80.7527	6.12638
	-8.75	1.58224																37.5	98.3926	68.0264	62.3042	73.7322	96.34	86.259	80.8424	6.1536
	-8.5	1.58267																38	98.643	69.2074	60.5152	73.2494	96.449	86.987	80.8419	6.33619
	-8.25	1.57924																38.5	98.1731	69.1789	60.0898	72.1534	96.772	87.5322	80.6498	6.43125
	-8	1.57567																39	98.439	69.624	59.7355	72.9799	96.6	87.9111	80.8815	6.43185
	-7.75	1.56888																39.5	98.726	69.3966	60.2624	73.4236	96.932	87.3895	81.0216	6.40559
	-7.5	1.56773																40	99.2585	69.6188	61.1671	75.6174	97.022	86.9956	81.6132	6.25995
	-7.25	1.56899																40.5	99.4597	69.2337	60.4508	76.9481	97.077	87.5281	81.783	6.36478
	-7	1.56507																41	99.1135	67.1177	62.1805	77.1779	97.422	87.2389	81.7085	6.31189
	-6.75	1.56479																41.5	99.1551	67.8474	62.7649	81.3549	97.528	87.865	82.7525	6.15661
	-6.5	1.56884																42	99.6488	67.7308	63.5807	79.1297	97.984	87.7738	82.6412	6.18855
	-6.25	1.57167																42.5	99.8294	67.6843	64.6373	77.7526	97.681	88.1874	82.6286	6.12134
	-6	1.57156																43	99.7749	66.7548	64.5687	76.8314	97.722	88.8801	82.422	6.25134
	-5.75	1.57102																43.5	99.7949	65.9182	65.9618	75.4022	97.892	88.2849	82.209	6.23922
	-5.5	1.57586																44	99.8972	66.9839	67.2993	75.4175	97.825	88.1459	82.5948	6.03134
	-5.25	1.57457																44.5	99.6722	66.4361	68.0121	75.3909	97.858	86.8079	82.3629	5.96572
	-5	1.57263																45	99.9128	66.2518	66.7481	79.6057	97.857	87.0589	82.9058	5.99821
	-4.75	1.57564																45.5	99.6623	66.7008	67.3559	82.2164	98.161	87.601	83.6162	5.88045
	-4.5	1.57698																46	99.5605	67.7379	66.4393	79.9206	97.794	87.9916	83.2406	5.87182
	-4.25	1.57493																46.5	99.3038	67.7912	66.0308	81.2147	97.586	87.743	83.2782	5.83966
	-4	1.57594																47	99.4002	67.4174	64.0482	79.8571	97.536	88.7514	82.835	6.12383
	-3.75	1.57987																47.5	99.4073	68.5425	64.0318	77.9999	97.65	89.3467	82.8298	6.10397
	-3.5	1.58635																48	99.4207	67.2682	64.9297	74.8224	97.675	88.8129	82.1548	6.20589
	-3.25	1.59026																48.5	99.1936	65.454	64.7651	68.4017	97.552	88.0256	80.5654	6.62616
	-3	1.59627																49	99.2254	66.7371	64.2685	70.9459	97.634	88.0298	81.1401	6.43586
	-2.75	1.59753																49.5	99.0397	66.8762	63.5679	67.5977	97.545	88.9841	80.6018	6.69563
	-2.5	1.59469																50	99.1598	66.9436	65.0841	66.1655	97.63	88.6399	80.6039	6.67018
	-2.25	1.59692																50.5	98.9971	67.3515	64.9911	65.6841	97.229	89.2377	80.5818	6.66145
	-2	1.59135																51	98.9776	67.7435	64.8067	67.9299	97.213	89.5969	81.0445	6.50313
	-1.75	1.59084																51.5	98.728	68.7254	65.1756	72.4847	97.235	89.7171	82.011	6.11363
	-1.5	1.5866																52	98.8612	70.0734	67.4716	73.316	97.31	89.0323	82.6775	5.75654
	-1.25	1.57971																52.5	98.8268	70.4758	68.187	73.8762	97.612	87.8362	82.8023	5.61747
	-1	1.57844																53	98.8949	71.0223	68.0754	76.7412	97.64	87.6586	83.3387	5.457
	-0.75	1.57532																53.5	98.681	71.9116	69.7527	76.5754	97.691	86.8815	83.5822	5.2105
	-0.5	1.57765																54	98.7603	71.8703	70.7145	76.1255	97.217	87.1324	83.6367	5.12257
	-0.25	1.58062																54.5	98.7209	73.3949	69.5413	73.8064	97.357	88.1229	83.4906	5.27886
	0	1.57862																55	98.8706	75.391	67.5613	72.1027	97.342	89.3899	83.443	5.51432
	0.25	1.58593																55.5	98.3204	74.57	68.4974	71.552	97.183	90.6669	83.465	5.49487
	0.5	1.58656																56	98.2816	74.5936	68.4564	74.4117	97.095	90.3513	83.865	5.28426
	0.75	1.59007																56.5	98.2476	75.3486	65.6091	72.8518	97.072	90.6187	83.2913	5.63332
	1	1.59559																57	98.4771	74.4745	63.8271	74.8748	97.379	90.4119	83.2408	5.79423
	1.25	1.59743																57.5	98.6526	73.954	63.9993	78.1758	97.317	89.4935	83.5987	5.64541
	1.5	1.60251																58	99.0602	74.1768	65.1988	76.7753	97.447	88.8535	83.5852	5.57471
	1.75	1.60438																58.5	98.7347	72.6543	65.1072	80.3311	97.489	88.6846	83.8335	5.53766
	2	1.60565																59	98.7217	70.7622	66.2923	76.4536	97.488	89.2983	83.1694	5.68139
	2.25	1.60691																59.5	98.7241	70.0017	67.4491	75.0604	97.56	89.9911	83.1311	5.72084
	2.5	1.605																60	99.2622	70.0289	69.1699	73.8768	97.547	89.9385	83.3039	5.67573
	2.75	1.60511																60.5	99.163	69.0759	69.7586	72.1103	97.442	90.0357	82.931	5.79396
	3	1.60244																61	99.5233	68.5168	70.3493	74.0627	97.509	89.7305	83.282	5.70977
	3.25	1.59749																61.5	99.398	66.8477	69.2875	76.2111	97.298	89.4407	83.0804	5.80166
	3.5	1.58895																62	99.7378	66.6205	68.8763	77.166	97.672	88.431	83.0839	5.85
	3.75	1.57725																62.5	100.23	65.652	71.765	81.0148	97.817	88.2587	84.1229	5.67927
	4	1.56663																63	100.296	64.6235	71.7411	80.1291	97.965	88.2492	83.8339	5.82856
	4.25	1.55521																63.5	100.175	64.3056	72.9203	80.8659	97.83	87.936	84.0054	5.74115
	4.5	1.54645																64	100.193	64.6272	74.3812	83.5111	97.613	87.825	84.6918	5.55983
	4.75	1.53382																64.5	99.984	63.7696	76.8695	83.3907	98.145	88.012	85.0285	5.5552
	5	1.52089																65	100.167	62.117	77.0605	84.6748	97.669	90.0552	85.2906	5.78033
	5.25	1.5069																65.5	100.337	62.4177	76.8627	85.177	97.699	89.7477	85.3736	5.75733
	5.5	1.49459																66	100.433	63.7445	78.6059	87.4716	97.674	90.314	86.3738	5.52118
	5.75	1.48374																66.5	100.191	62.5785	79.1649	87.7757	98.026	91.9007	86.6061	5.70688
	6	1.47303																67	100.222	64.0425	80.452	87.0185	98.107	92.3018	87.0241	5.46574
	6.25	1.45837																67.5	99.8835	64.0048	82.3435	84.5609	97.659	91.6386	86.6817	5.34454
	6.5	1.4446																68	99.8401	64.0961	85.0145	85.0939	97.395	90.8471	87.0478	5.22773
	6.75	1.42999																68.5	99.7888	64.1274	84.8957	85.9101	97.398	90.7694	87.1483	5.21066
	7	1.41503																69	99.7702	65.2934	84.6877	86.2736	97.291	90.0914	87.2345	5.01748
	7.25	1.39805																69.5	99.5791	65.7568	84.4946	87.3284	96.949	89.1589	87.2111	4.89645
	7.5	1.38455																70	99.3492	65.4014	83.3895	86.3888	97.114	89.5941	86.8728	4.97103
	7.75	1.36956																70.5	99.2539	64.076	81.6686	87.3563	97.158	89.7388	86.5419	5.20784
	8	1.35255																71	99.5429	63.6537	81.3588	87.7283	97.335	89.8757	86.5824	5.31903
	8.25	1.33669																71.5	99.5347	64.1745	81.6744	86.243	97.033	90.3931	86.5088	5.22109
	8.5	1.32308																72	99.4371	64.702	81.9792	84.1311	96.985	90.1249	86.2265	5.13548
	8.75	1.30966																72.5	98.593	63.6381	83.8764	83.0673	96.844	90.2405	86.0431	5.1875
	9	1.29414																73	97.3481	64.2546	85.3953	86.2711	96.847	90.1685	86.7141	4.94658
	9.25	1.28079																73.5	96.101	62.6469	86.3529	86.9195	96.965	90.5242	86.5849	5.12188
	9.5	1.26825																74	95.2142	62.1528	87.5139	87.3811	97.194	89.5404	86.4994	5.14501
	9.75	1.25376																74.5	94.5054	61.6485	88.1496	88.8713	97.43	90.0829	86.7812	5.23402
	10	1.24065																75	93.7362	61.334	87.8694	90.7811	97.645	90.9622	87.0546	5.31714
	10.25	1.22726																75.5	92.9409	60.8286	86.5959	90.7668	98.08	90.8674	86.68	5.39044
	10.5	1.21587																76	92.5656	59.8685	86.4601	88.6762	98.021	91.0698	86.1103	5.4878
	10.75	1.20303																76.5	92.6551	59.6923	86.4293	87.6839	97.963	91.3569	85.9634	5.51122
	11	1.18957																77	92.3187	60.3663	83.8192	86.6748	98.082	92.3675	85.6048	5.44003
	11.25	1.17749																77.5	91.6091	61.208	84.1355	87.7627	98.42	91.6423	85.7963	5.28689
	11.5	1.16528																78	91.1971	60.7321	83.9078	85.5885	98.198	91.8314	85.2426	5.32099
	11.75	1.15375																78.5	90.7191	61.2429	84.375	86.298	98.239	91.7765	85.4417	5.22558
	12	1.14133																79	91.0526	60.9908	82.9384	87.4561	98.315	91.1384	85.3152	5.28433
	12.25	1.12974																79.5	91.7293	61.3669	83.0677	87.0871	98.489	90.5356	85.3793	5.23968
	12.5	1.12006																80	92.7044	61.4851	82.9209	90.3772	98.501	90.3133	86.0503	5.3211
	12.75	1.10668																80.5	93.1624	61.7141	83.1124	90.5779	98.336	91.0384	86.3235	5.31451
	13	1.09552																81	93.2814	62.0903	82.9466	91.2617	98.555	90.1085	86.374	5.27694
	13.25	1.08441																81.5	93.3144	62.4725	83.5575	91.5556	98.437	90.2387	86.5959	5.21018
	13.5	1.07296																82	93.1547	62.5169	84.1941	89.5111	98.63	90.2316	86.373	5.14721
	13.75	1.06392																82.5	93.1112	63.1085	83.0914	92.9204	98.459	90.2933	86.8306	5.16545
	14	1.05311																83	92.4175	62.8151	83.4418	89.5386	98.21	90.8116	86.2057	5.06545
	14.25	1.04477																83.5	92.1376	63.3616	83.1711	90.0811	97.917	91.8269	86.4159	4.99919
	14.5	1.03568																84	91.9798	63.2868	83.8008	90.9627	97.665	92.172	86.6445	5.00926
	14.75	1.02608																84.5	92.0408	63.6129	82.2072	90.2534	97.481	92.7062	86.3836	4.98681
	15	1.01846																85	91.5004	62.9167	82.1243	92.7372	96.794	93.426	86.5831	5.14171
	15.25	1.0094																85.5	91.2538	62.8428	83.9271	92.4676	96.8	94.7931	87.014	5.15678
	15.5	1.00083																86	90.8151	62.0657	84.8542	92.8317	96.875	94.9338	87.0625	5.27673
	15.75	0.992937																86.5	90.7515	63.3438	84.589	94.0497	97.09	93.7734	87.2663	5.08747
	16	0.984371																87	90.2805	63.5061	85.3692	92.0547	97.499	94.4181	87.1879	5.01989
	16.25	0.977718																87.5	89.9144	63.8042	84.6742	93.6114	97.784	94.0407	87.3048	5.03643
	16.5	0.96879																88	89.684	63.6607	84.5342	93.8844	98.113	94.0549	87.3219	5.09268
	16.75	0.960377																88.5	89.6301	64.7112	85.2251	92.5837	98.146	92.7328	87.1714	4.81299
	17	0.951875																89	89.1855	64.23	85.9589	93.1404	98.058	92.3821	87.1591	4.87554
	17.25	0.943955																89.5	88.8879	65.1775	86.6145	91.8646	97.885	92.0113	87.0734	4.64457
	17.5	0.936168																90	89.0865	63.9179	86.0631	95.0006	97.344	91.8655	87.2129	4.94108
	17.75	0.929486																90.5	88.8435	64.0804	87.918	95.449	97.362	92.3276	87.6634	4.94656
	18	0.921216																91	88.504	65.1552	89.3342	95.6011	97.439	91.6246	87.9429	4.77458
	18.25	0.913105																91.5	88.5735	64.9186	86.9851	95.982	97.46	92.8679	87.7979	4.86749
	18.5	0.90401																92	88.4774	65.3516	87.4318	96.4946	97.617	92.5997	87.9954	4.82807
	18.75	0.895957																92.5	88.5305	65.3923	87.9322	97.4138	97.492	93.7221	88.4138	4.90521
	19	0.888444																93	88.2159	64.7306	88.0185	97.9918	97.816	93.3934	88.361	5.05307
	19.25	0.880906																93.5	88.0773	64.6061	88.1372	98.3154	97.352	92.5903	88.1797	5.03999
	19.5	0.873072																94	88.4234	64.2536	87.7163	95.9655	97.332	93.1241	87.8025	4.96895
	19.75	0.866809																94.5	88.526	63.9438	87.8009	94.9145	97.386	92.1551	87.4545	4.93427
	20	0.859002																95	88.6579	64.1933	87.3931	93.2268	97.379	92.237	87.1811	4.81931
	20.25	0.852959																95.5	89.208	65.4928	85.804	91.5436	97.668	91.0737	86.7983	4.54483
	20.5	0.846509																96	89.3328	66.5863	84.7009	89.802	97.554	91.2569	86.5388	4.33408
	20.75	0.840769																96.5	88.7736	67.1592	83.3671	87.6308	97.87	91.8116	86.102	4.26953
	21	0.834887																97	88.84	67.177	83.2906	90.3155	97.769	91.6426	86.5058	4.30951
	21.25	0.827864																97.5	88.7509	66.7631	83.2045	91.1248	97.788	92.4371	86.6781	4.43226
	21.5	0.82229																98	88.8326	67.7101	81.1096	92.293	97.726	92.0552	86.6211	4.38904
	21.75	0.816617																98.5	89.0947	68.4859	79.767	91.8521	97.921	91.8839	86.5007	4.33833
	22	0.809337																99	89.0494	68.5538	79.7522	93.0755	98.184	91.3542	86.6616	4.3866
	22.25	0.802561																99.5	88.6821	67.7842	82.8166	93.8706	98.314	90.4001	86.978	4.38313
	22.5	0.795712																100	88.8704	68.5014	81.9692	92.3992	98.249	89.4978	86.5811	4.21061
	22.75	0.789271																100.5	88.2175	69.0161	82.4462	91.4399	97.889	89.0513	86.3434	4.02306
	23	0.782867																101	88.3585	69.321	83.9989	91.9863	97.932	89.254	86.8085	3.96918
	23.25	0.777067																101.5	88.2618	68.7942	84.9627	94.1561	97.282	89.3063	87.1272	4.07981
	23.5	0.771605																102	87.686	67.2893	86.5236	93.7062	97.374	90.3892	87.1614	4.29391
	23.75	0.764722																102.5	87.9472	66.3231	83.881	94.525	97.4	91.6205	86.9495	4.5617
	24	0.758537																103	88.1535	67.1664	84.9307	93.0666	97.531	91.8296	87.113	4.35868
	24.25	0.752754																103.5	87.8453	67.1733	85.5591	97.9978	97.652	92.0483	88.0459	4.65194
	24.5	0.747932																104	87.7577	67.7121	85.0078	97.6085	97.494	92.2645	87.9741	4.55063
	24.75	0.742855																104.5	87.4035	66.0905	84.7782	94.7505	97.633	91.8591	87.0857	4.61517
	25	0.736435																105	86.63	65.3213	84.8137	95.3405	97.232	91.2886	86.771	4.716
	25.25	0.73107																105.5	86.514	65.2596	83.69	97.1754	97.238	90.6346	86.7519	4.84777
	25.5	0.724793																106	86.751	66.8193	82.0232	100	97.264	91.1431	87.3334	4.90897
	25.75	0.718822																106.5	86.8608	65.9064	83.4993	95.6077	97.227	91.1532	86.7091	4.66419
	26	0.713435																107	87.3389	66.9593	84.8977	95.236	97.362	90.2775	87.012	4.44267
	26.25	0.708863																107.5	87.2321	66.6039	85.051	94.7135	97.699	90.9551	87.0424	4.5072
	26.5	0.703588																108	87.0027	65.3459	84.2617	96.5854	97.699	90.0654	86.8266	4.80262
	26.75	0.698409																108.5	87.1408	66.5857	85.1542	94.4483	97.794	89.2912	86.7356	4.46087
	27	0.693057																109	86.9401	65.4368	84.0851	90.7106	97.789	89.5638	85.7542	4.47546
	27.25	0.6885																109.5	86.8504	64.3117	80.927	91.9857	97.588	89.983	85.2742	4.75971
	27.5	0.682832																110	87.2071	63.4172	76.6955	92.9406	97.596	90.541	84.7328	5.1369
	27.75	0.678829																110.5	87.3378	62.8308	74.876	93.7695	97.147	91.0673	84.5048	5.35174
	28	0.673504																111	87.3557	63.0571	71.7771	90.0673	97.278	91.5875	83.5204	5.38073
	28.25	0.669917																111.5	87.8666	62.2392	69.9695	90.0763	96.987	92.1918	83.2217	5.6403
	28.5	0.664364																112	88.0552	62.5081	70.9698	92.3211	96.871	91.7359	83.7435	5.60501
	28.75	0.661333																112.5	88.2214	61.3355	70.7972	90.355	97.028	90.5136	83.0418	5.63575
	29	0.656198																113	88.1295	61.664	73.0814	89.7472	96.963	90.3219	83.3179	5.39573
	29.25	0.651523																113.5	87.7998	60.6391	74.804	89.8757	96.989	89.5039	83.2686	5.40079
	29.5	0.646715																114	87.8351	61.1054	78.8605	91.7039	96.942	89.4128	84.3099	5.23082
	29.75	0.642722																114.5	87.9873	61.0645	79.0967	90.1229	96.938	90.6993	84.3182	5.21262
	30	0.637091																115	87.7372	61.1332	81.4289	91.947	97	90.6381	84.9807	5.20865
	30.25	0.633283																115.5	88.1128	62.2625	82.4257	91.6542	97.298	90.7073	85.4102	5.03456
	30.5	0.628338																116	88.1133	62.2874	81.9689	92.4892	97.288	90.8248	85.4952	5.08027
	30.75	0.622972																116.5	88.3236	62.3212	82.9011	92.0677	97.634	91.8304	85.8463	5.10459
	31	0.616991																117	88.3507	62.1839	82.1326	90.6506	97.617	92.824	85.6264	5.13157
	31.25	0.613055																117.5	88.5477	64.0165	84.3089	92.6605	97.04	92.4474	86.5035	4.82673
	31.5	0.609491																118	88.1797	64.9283	84.0252	88.8675	96.123	92.7121	85.8059	4.50254
	31.75	0.606113																118.5	88.0519	66.2003	84.1081	87.9141	94.397	92.9867	85.6097	4.1709
	32	0.602556																119	87.791	67.4234	85.516	86.6386	92.667	93.0128	85.508	3.83454
	32.25	0.598506																119.5	87.941	66.8461	84.9934	87.4565	90.015	92.7677	85.0033	3.7848
	32.5	0.593605																120	87.6649	66.9857	86.3413	87.7259	86.85	92.3875	84.6593	3.64303
	32.75	0.589819																120.5	87.3614	67.5748	85.3174	86.8811	83.944	92.2922	83.8951	3.46323
	33	0.586494																121	86.7918	66.8982	83.4764	86.7367	81.106	91.8311	82.8068	3.50801
	33.25	0.582728																121.5	86.665	65.0646	83.8902	89.7491	78.307	90.9039	82.43	3.93275
	33.5	0.578838																122	85.826	64.0209	84.0956	89.4202	75.556	90.8353	81.6256	4.14764
	33.75	0.574838																122.5	84.9104	64.6315	84.9244	89.1091	73.054	89.2712	80.9834	4.06584
	34	0.571569																123	83.6877	65.8984	83.2813	86.4977	70.875	87.2375	79.5797	3.65157
	34.25	0.568918																123.5	82.3866	66.764	84.3411	83.8435	68.952	85.592	78.6465	3.44888
	34.5	0.566586																124	80.9805	65.5384	86.4049	83.1509	67.202	84.4405	77.9528	3.73907
	34.75	0.56511																124.5	79.7371	65.1537	87.8838	79.4783	65.504	83.6136	76.8951	3.86546
	35	0.562877																125	78.3999	63.5279	88.6453	77.1742	63.973	80.8247	75.4243	4.03535
	35.25	0.562191																125.5	77.3348	63.4892	88.6828	76.2203	62.959	78.6491	74.5558	4.01575
	35.5	0.562761																126	75.6151	65.0748	91.0104	75.6707	62.001	76.1962	74.2614	4.17451
	35.75	0.562638																126.5	74.4853	64.5288	92.9968	74.2443	60.913	73.4991	73.4446	4.54803
	36	0.562508																127	73.016	63.2113	92.8531	70.5133	59.868	71.4833	71.8241	4.69969
	36.25	0.562053																127.5	71.9085	64.9403	90.9019	70.4167	59.252	68.611	71.0051	4.38818
	36.5	0.561723																128	70.2601	66.3532	91.3871	68.152	58.206	67.1473	70.251	4.54987
	36.75	0.562927																128.5	68.3937	66.1946	92.5615	65.931	57.386	66.0712	69.4229	4.88262
	37	0.563132																129	67.1924	66.3423	90.1919	63.6609	56.825	64.9686	68.1968	4.64957
	37.25	0.563936																129.5	65.8226	65.0802	89.3248	62.0026	56.035	63.0052	66.8783	4.70655
	37.5	0.563714																130	64.4853	63.8923	88.7717	62.4122	55.348	61.2591	66.028	4.74025
	37.75	0.562519																130.5	63.2783	63.3484	88.4829	62.8554	54.516	59.6744	65.3592	4.82787
	38	0.562229																131	61.8239	61.338	88.5157	60.6924	54.086	58.2008	64.1094	5.01874
	38.25	0.562111																131.5	60.5314	61.6908	89.4226	57.0599	53.589	55.7319	63.0043	5.42413
	38.5	0.560955																132	58.8072	60.0211	90.8586	57.4743	52.963	54.1723	62.3827	5.80079
	38.75	0.559534																132.5	57.1976	57.1367	91.4083	56.0856	52.577	52.1664	61.0953	6.1295
	39	0.557783																133	55.6891	56.52	91.6737	55.3369	52.329	50.0831	60.2719	6.35718
	39.25	0.555924																133.5	54.0523	56.0414	91.0921	49.9997	51.659	49.5383	58.7305	6.55011
	39.5	0.553298																134	52.2879	54.9547	91.0158	50.6944	51.272	48.1309	58.0592	6.65324
	39.75	0.551493																134.5	51.2616	53.7523	89.18	50.4185	50.651	47.3483	57.102	6.46978
	40	0.549239																135	50.134	52.1391	88.1927	45.4692	49.861	47.0908	55.4812	6.61318
	40.25	0.54646																135.5	48.7938	50.3098	86.1108	43.5536	49.328	47.2373	54.2222	6.45038
	40.5	0.544107																136	47.8314	48.5735	85.8499	39.8748	48.424	46.7658	52.8866	6.72663
	40.75	0.541531																136.5	46.8291	48.5997	84.9551	39.5787	48.246	45.5642	52.2955	6.66737
	41	0.539433																137	45.9474	47.4216	82.3159	38.803	47.923	44.5312	51.157	6.37431
	41.25	0.536456																137.5	44.9264	47.2979	80.3753	38.089	47.362	44.113	50.3606	6.16011
	41.5	0.535097																138	43.6375	46.1243	79.5944	39.82	47.17	43.0508	49.8995	6.03104
	41.75	0.532984																138.5	42.712	45.2282	79.9041	41.4068	46.912	42.713	49.8126	6.07292
	42	0.529933																139	42.1362	45.3113	77.4354	44.2184	46.749	41.9087	49.6266	5.61293
	42.25	0.527931																139.5	41.5689	45.0663	77.8836	41.7324	46.26	41.4665	48.9962	5.83678
	42.5	0.525911																140	41.1748	44.6902	77.7684	39.6266	45.642	40.6784	48.2634	5.9793
	42.75	0.523483																140.5	40.923	43.2155	78.002	38.462	45.349	40.0612	47.6688	6.14672
	43	0.521765																141	40.2145	42.5962	76.7479	36.5835	44.801	40.1559	46.8498	6.08391
	43.25	0.51954																141.5	40.1727	42.8167	74.5694	32.0908	43.77	39.6338	45.5089	6.04931
	43.5	0.517257																142	39.9392	41.9566	74.6722	27.8261	43.374	39.424	44.532	6.43604
	43.75	0.515071																142.5	39.5574	41.4535	73.9109	28.3544	43.006	38.6781	44.16	6.3109
	44	0.513427																143	39.3283	41.4005	72.7446	28.8724	42.744	39.2499	44.0567	6.07673
	44.25	0.511904																143.5	39.3751	41.1545	71.2303	29.4282	42.435	38.8118	43.7392	5.80881
	44.5	0.510473																144	39.9937	40.9385	68.578	30.2026	42.462	37.2286	43.2339	5.36831
	44.75	0.508317																144.5	40.9859	39.7509	67.7727	34.3339	42.661	36.5161	43.67	4.97616
	45	0.506571																145	41.7195	38.5998	65.5547	37.5148	42.19	35.8857	43.5774	4.50582
	45.25	0.504976																145.5	42.1513	37.7012	62.9919	36.2907	41.654	35.6174	42.7344	4.20071
	45.5	0.50325																146	42.9843	37.5159	63.0673	33.1116	41.381	34.5297	42.0984	4.47228
	45.75	0.502304																146.5	43.762	37.655	62.5508	31.9556	41.178	33.2499	41.7252	4.55338
	46	0.50046																147	44.731	37.7208	63.8518	30.3267	40.708	32.5906	41.6548	4.9296
	46.25	0.498441																147.5	45.4445	37.5624	62.7264	28.5235	40.151	32.3247	41.122	4.9503
	46.5	0.497291																148	45.9249	37.5788	61.143	26.0388	39.719	32.7286	40.5222	4.94713
	46.75	0.495741																148.5	47.1911	38.0807	61.4902	29.4047	39.395	31.83	41.2319	4.78711
	47	0.494687																149	48.0955	38.5115	59.2149	32.268	38.912	31.3324	41.3891	4.32621
	47.25	0.49345																149.5	48.7933	37.7452	55.7921	33.8936	38.705	31.8199	41.1249	3.7863
	47.5	0.492294																150	49.6786	36.9542	54.4272	34.0629	38.529	32.426	41.0129	3.65021
	47.75	0.490865																150.5	50.2958	35.9752	51.1709	34.6862	38.588	32.4226	40.5232	3.33164
	48	0.489167																151	50.7195	36.2394	51.7123	34.9213	38.668	31.6803	40.6568	3.46614
	48.25	0.487951																151.5	51.4686	36.2772	50.055	33.7913	38.973	31.6167	40.3636	3.44278
	48.5	0.487523																152	52.2612	37.02	49.9884	32.9261	38.697	31.5371	40.4049	3.5654
	48.75	0.485995																152.5	52.8103	35.6369	49.7949	31.5799	38.376	30.2419	39.74	3.86191
	49	0.485476																153	53.1694	34.4516	49.5661	31.935	37.992	29.8913	39.5009	3.9391
	49.25	0.485099																153.5	53.6977	32.9626	51.1903	30.2371	37.634	28.4472	39.0281	4.43879
	49.5	0.483823																154	54.3648	31.7581	48.7735	30.7966	37.646	27.4446	38.464	4.41579
	49.75	0.483275																154.5	55.1461	31.5003	47.8511	28.9495	37.443	27.4148	38.0508	4.57358
	50	0.482269																155	55.6162	31.4712	44.6724	27.9424	37.405	26.7908	37.3163	4.55276
	50.25	0.482094																155.5	56.6727	31.6653	43.31	27.4669	37.276	27.1665	37.2595	4.62795
	50.5	0.481142																156	57.5508	30.9497	40.2666	29.2108	37.374	27.3164	37.1113	4.56115
	50.75	0.47948																156.5	58.2218	31.3159	38.381	29.6705	37.262	27.6402	37.0819	4.56777
	51	0.47905																157	59.7784	32.4585	38.5046	30.7261	36.769	28.2576	37.749	4.66985
	51.25	0.477795																157.5	61.2747	32.4361	38.4576	28.9206	36.224	27.9662	37.5466	5.0263
	51.5	0.476155																158	62.9718	32.5901	38.4944	30.6758	36.082	28.0286	38.1405	5.1953
	51.75	0.475424																158.5	64.8737	31.5324	38.216	30.9837	35.754	28.5652	38.3208	5.49771
	52	0.473934																159	66.7003	31.63	39.4514	30.0866	35.412	27.6991	38.4965	5.88881
	52.25	0.473365																159.5	68.5567	32.2567	39.5678	29.0234	35.111	27.741	38.7094	6.21909
	52.5	0.472426																160	70.3147	33.9014	39.8863	26.3871	35.079	27.7729	38.8903	6.60259
	52.75	0.472501																160.5	72.4571	34.3155	38.6586	27.9383	35.057	28.0627	39.4149	6.82628
	53	0.472318																161	74.1885	33.8085	40.165	27.7754	35.153	27.4564	39.7578	7.15807
	53.25	0.471609																161.5	75.6212	33.3136	41.0642	23.6147	35.235	27.0569	39.3175	7.68251
	53.5	0.47079																162	76.8358	33.5217	40.5413	20.8383	35.031	27.3866	39.0258	8.05069
	53.75	0.470416																162.5	78.237	33.4683	40.4218	20.792	35.248	27.3041	39.2453	8.27487
	54	0.470472																163	78.9092	31.7473	41.3771	19.4758	35.022	26.05	38.7635	8.59337
	54.25	0.47045																163.5	78.9112	31.4477	42.1708	18.7218	35.337	25.4228	38.6685	8.6954
	54.5	0.470458																164	78.3402	31.3836	44.2495	17.3823	34.955	25.6361	38.6577	8.74604
	54.75	0.469756																164.5	77.3525	30.8784	45.1894	22.4688	34.715	25.2013	39.3008	8.27988
	55	0.468259																165	76.4241	31.8309	47.823	26.0963	34.656	24.3261	40.1927	8.0041
	55.25	0.467633																165.5	74.9557	31.9956	49.3608	27.5648	34.159	23.6659	40.2837	7.8074
	55.5	0.466961																166	74.0272	31.0442	51.1943	30.5552	34.195	23.7647	40.7968	7.629
	55.75	0.466098																166.5	73.0014	30.8971	53.9099	32.4894	33.56	24.1833	41.3402	7.53372
	56	0.464943																167	71.3846	32.1518	52.394	32.1652	33.69	23.9329	40.953	7.19746
	56.25	0.46384																167.5	70.0324	33.3427	53.3364	29.6421	33.454	23.8364	40.6073	7.14917
	56.5	0.462729																168	68.7445	32.9978	51.346	26.4716	33.113	24.7786	39.5752	6.98825
	56.75	0.461495																168.5	67.8818	32.1701	49.2769	24.6127	33.265	24.2886	38.5825	6.93225
	57	0.460518																169	66.9347	32.9484	46.2447	24.3918	32.962	24.7467	38.0381	6.62549
	57.25	0.459692																169.5	66.4072	33.6597	43.5878	26.5896	33.152	24.6819	38.013	6.29312
	57.5	0.458654																170	65.4435	33.8324	42.2435	26.4875	32.988	25.0427	37.6729	6.09216
	57.75	0.45858																170.5	65.7618	34.5282	40.2383	27.3341	33.124	25.4027	37.7316	6.00992
	58	0.457968																171	65.5529	36.5483	38.2546	28.3068	33.213	25.093	37.8282	5.90089
	58.25	0.458076																171.5	65.6274	36.3837	36.9883	25.3157	32.998	25.2158	37.0882	6.08624
	58.5	0.457048																172	65.4244	37.3011	36.3967	24.5593	32.774	25.1782	36.939	6.11217
	58.75	0.456684																172.5	65.6152	37.8187	34.5055	20.8054	32.287	25.153	36.0308	6.44183
	59	0.456192																173	65.1493	36.7581	33.3717	22.4544	32.194	24.9487	35.8127	6.26378
	59.25	0.455841																173.5	65.1475	36.1399	31.8492	24.0712	31.777	24.8978	35.6471	6.18996
	59.5	0.455816																174	65.7095	34.736	30.9271	26.1383	31.563	24.6697	35.6239	6.20338
	59.75	0.455574																174.5	65.8244	35.3403	31.4179	31.7825	31.246	25.2007	36.802	5.95562
	60	0.45451																175	65.5932	35.7867	30.8343	31.807	31.101	25.0919	36.7024	5.94444
	60.25	0.454089																175.5	65.1059	34.7586	30.7564	32.2759	31.072	25.7016	36.6117	5.82568
	60.5	0.453037																176	65.2843	35.4938	31.6509	31.3354	30.891	26.2384	36.8157	5.81921
	60.75	0.452854																176.5	65.7321	34.5082	31.6607	29.6508	30.917	25.3235	36.2987	6.01292
	61	0.452077																177	64.8747	34.2484	33.2357	29.6564	30.541	24.6958	36.2087	5.89355
	61.25	0.451983																177.5	65.3847	33.0185	33.9301	27.0521	30.498	24.6265	35.7516	6.09906
	61.5	0.451969																178	64.9973	32.662	35.0028	29.4535	30.269	23.7171	36.017	5.99873
	61.75	0.450914																178.5	65.6279	32.2728	37.43	31.8659	30.059	22.7323	36.6646	6.10878
	62	0.450556																179	65.1957	31.2337	37.9416	32.1117	29.902	21.4583	36.3072	6.17003
	62.25	0.449797																179.5	65.5481	32.6115	39.9297	31.3021	29.659	22.1925	36.8739	6.18696
	62.5	0.449387																180	65.3721	31.4088	39.9732	27.9046	29.698	22.5425	36.1498	6.28705
	62.75	0.449233																180.5	64.6605	31.5308	40.5125	29.1456	29.745	23.3369	36.4885	6.07397
	63	0.449072																181	64.3687	32.2179	40.5638	29.6226	29.765	23.7948	36.7221	5.95903
	63.25	0.44891																181.5	64.5324	32.4537	39.8942	27.7915	29.896	23.7279	36.3826	6.04486
	63.5	0.448246																182	64.7846	33.1249	40.5985	28.6904	29.838	25.0176	37.009	5.95501
	63.75	0.447213																182.5	64.5301	32.992	41.567	29.509	29.609	23.6669	36.979	6.00928
	64	0.447416																183	64.2506	33.1532	42.2536	33.3895	29.575	23.7229	37.7241	5.84894
	64.25	0.447007																183.5	64.5976	32.9533	43.4575	35.8347	29.278	22.3181	38.0731	6.02589
	64.5	0.446559																184	63.8858	32.7918	45.6833	34.0142	29.309	22.1862	37.9784	6.04905
	64.75	0.445494																184.5	63.7747	32.6816	45.3704	33.7478	29.232	22.5899	37.8994	5.99809
	65	0.444838																185	63.5459	31.5843	45.0184	33.1903	28.687	22.4017	37.4046	6.03892
	65.25	0.444199																185.5	63.4341	31.8564	44.289	33.5662	29.042	23.4144	37.6003	5.87616
	65.5	0.443289																186	63.2666	31.7009	44.3654	30.1277	29.017	23.8508	37.0547	5.93325
	65.75	0.442656																186.5	63.7901	31.9188	44.3422	28.1349	29.082	24.9541	37.037	6.0106
	66	0.442473																187	63.8165	32.5962	41.4636	28.9157	29.28	25.5027	36.9292	5.81822
	66.25	0.442171																187.5	63.6643	31.8195	42.1593	29.529	29.035	25.5967	36.9674	5.81297
	66.5	0.44196																188	63.0395	31.3666	42.3309	26.6011	29.305	24.4462	36.1815	5.94178
	66.75	0.441713																188.5	63.082	30.9108	43.1702	25.7884	28.789	24.0216	35.9604	6.08411
	67	0.442192																189	63.0495	31.56	43.7989	27.0804	29.066	22.5819	36.1894	6.10926
	67.25	0.442731																189.5	62.9861	31.34	44.1882	26.4607	29.31	22.5483	36.1388	6.14711
	67.5	0.442802																190	63.1196	29.7537	45.4472	26.1644	29.136	22.3242	35.9909	6.31035
	67.75	0.442788																190.5	62.8658	29.2106	45.163	27.2255	29.101	22.0804	35.9411	6.2454
	68	0.442732																191	62.741	28.4692	44.935	30.9241	29.003	22.3456	36.4031	6.08773
	68.25	0.442169																191.5	62.3949	29.0215	45.4668	34.0644	29.04	22.4246	37.0687	5.95717
	68.5	0.441205																192	62.3597	29.8218	43.8291	34.9284	28.854	22.975	37.1279	5.79809
	68.75	0.440397																192.5	62.2004	29.583	41.9496	35.5201	28.406	22.9116	36.7618	5.74094
	69	0.439728																193	61.4136	30.8914	41.2992	34.8135	28.436	23.2844	36.6897	5.53018
	69.25	0.438889																193.5	61.1476	30.7806	40.3246	32.7914	28.647	23.3513	36.1738	5.48487
	69.5	0.438034																194	61.3558	31.3276	39.18	30.4028	28.79	23.6107	35.7779	5.5117
	69.75	0.4371																194.5	61.2767	32.5979	36.9658	27.4988	29.336	23.3688	35.1739	5.54843
	70	0.436689																195	60.8028	32.8368	37.5976	24.6117	29.124	22.8809	34.6424	5.67379
	70.25	0.436258																195.5	60.3633	32.7869	39.8719	21.6366	29.426	22.9778	34.5104	5.84431
	70.5	0.436124																196	60.2671	34.1276	37.442	22.1762	29.483	22.4406	34.3228	5.75911
	70.75	0.435617																196.5	59.5375	34.3673	35.7909	23.6013	29.509	22.7346	34.2567	5.50855
	71	0.435536																197	59.3112	35.3894	34.0907	24.5222	29.521	23.3611	34.3659	5.36927
	71.25	0.435822																197.5	59.5377	36.4262	31.683	24.5377	28.787	23.9206	34.1486	5.42097
	71.5	0.435896																198	59.597	36.6782	30.1335	25.1262	28.596	25.4924	34.2705	5.34547
	71.75	0.435517																198.5	59.3895	36.2064	25.2397	30.0407	28.226	25.8416	34.1573	5.29675
	72	0.435351																199	58.91	35.9473	25.2951	26.2096	27.674	26.6084	33.4407	5.33398
	72.25	0.434814																199.5	59.2179	35.4117	25.0585	25.8916	27.612	25.9733	33.1941	5.4313
	72.5	0.434806																200	59.3691	35.4345	24.636	24.9244	27.438	25.4672	32.8781	5.54983
	72.75	0.434705																200.5	58.8577	35.2965	25.2076	23.5537	27.788	26.0457	32.7915	5.47454
	73	0.434916																201	58.612	33.7307	23.7136	26.5632	27.975	25.6331	32.7045	5.36401
	73.25	0.434182																201.5	58.9525	34.3254	23.1636	26.4008	28.084	24.5935	32.5866	5.50578
	73.5	0.433323																202	59.1516	33.915	23.3333	27.544	28.166	24.3473	32.7429	5.49483
	73.75	0.432907																202.5	58.7774	33.6593	23.824	28.1501	28.177	23.9648	32.7588	5.40731
	74	0.432156																203	59.0437	35.6137	21.391	27.2004	27.899	25.0634	32.7018	5.60353
	74.25	0.431598																203.5	59.4593	35.6756	19.9683	27.9537	27.448	24.0991	32.4339	5.80424
	74.5	0.431327																204	59.6263	34.8889	20.2578	28.5631	27.141	23.0514	32.2548	5.84392
	74.75	0.430382																204.5	59.4832	34.2679	22.6724	29.6325	26.758	23.3959	32.7017	5.63214
	75	0.429614																205	59.2346	34.4051	22.9904	33.746	26.667	23.5162	33.4265	5.53756
	75.25	0.429209																205.5	59.0981	33.4975	23.9623	32.2584	26.049	23.8401	33.1176	5.46419
	75.5	0.428508																206	58.495	33.6758	25.7192	34.826	25.987	23.3359	33.6731	5.31243
	75.75	0.428478																206.5	58.3022	34.0133	27.1275	35.1833	26.09	23.8351	34.0919	5.18031
	76	0.427838																207	58.0395	33.5216	26.4015	34.0998	26.259	24.1317	33.7422	5.1406
	76.25	0.42789																207.5	58.2435	33.1724	24.4679	31.5042	26.688	24.0647	33.0234	5.26618
	76.5	0.426951																208	58.0004	32.675	28.4527	29.3437	26.692	22.867	33.0051	5.16927
	76.75	0.426525																208.5	57.8134	31.51	28.983	30.372	26.832	23.3409	33.1419	5.07342
	77	0.425995																209	57.9478	30.356	30.224	30.3127	27.271	23.0863	33.1997	5.08322
	77.25	0.425165																209.5	57.3695	28.6412	29.5697	32.0559	27.271	22.8052	32.952	5.04074
	77.5	0.424877																210	56.9325	29.451	32.1245	31.4583	27.13	22.7984	33.3158	4.9208
	77.75	0.424987																210.5	56.3038	30.1584	33.2661	33.3479	27.05	22.6643	33.7984	4.79494
	78	0.423675																211	56.1655	30.7073	29.6097	34.285	27.257	23.4103	33.5724	4.75403
	78.25	0.423367																211.5	56.3064	31.5132	29.9693	34.5251	27.146	22.0621	33.5869	4.86056
	78.5	0.422346																212	56.2304	31.2123	31.12	33.6159	26.8	22.0545	33.5056	4.84241
	78.75	0.422301																212.5	56.5999	30.6714	31.5133	33.1109	26.936	21.8381	33.4449	4.91518
	79	0.422141																213	56.4664	29.8936	32.4568	33.3403	27.011	21.5532	33.4536	4.92068
	79.25	0.421401																213.5	56.85	30.8159	33.0997	29.5361	26.916	20.8868	33.0174	5.06407
	79.5	0.421281																214	56.716	31.3242	34.954	28.9704	26.381	21.0048	33.225	5.07513
	79.75	0.420522																214.5	56.8953	30.4107	34.0961	28.5547	26.479	21.4411	32.9795	5.08193
	80	0.420379																215	56.9045	31.0691	32.7083	30.8757	26.596	21.3131	33.2445	5.02324
	80.25	0.420895																215.5	56.7083	31.1421	32.9936	28.6744	26.185	21.7114	32.9025	5.0268
	80.5	0.420964																216	57.3397	32.3811	32.4848	30.2286	26.202	22.7485	33.5641	5.00051
	80.75	0.421019																216.5	57.5942	30.8325	31.9644	32.386	26.023	23.18	33.6633	5.01163
	81	0.421265																217	57.6228	30.2987	30.7739	29.1427	26.54	23.1382	32.9194	5.07399
	81.25	0.421189																217.5	57.5001	30.0582	30.5654	30.1224	26.442	24.3087	33.1661	4.97159
	81.5	0.421278																218	57.5573	29.2983	30.0519	27.2898	26.157	23.9779	32.3887	5.1122
	81.75	0.421281																218.5	57.9258	29.8188	32.3039	29.3722	26.071	23.4014	33.1489	5.11555
	82	0.421079																219	57.6459	29.3772	32.4641	27.6929	25.881	22.4901	32.5918	5.19339
	82.25	0.420984																219.5	57.6112	30.0398	31.8888	26.4466	25.69	22.5375	32.3691	5.22545
	82.5	0.420431																220	57.471	29.2649	32.3974	31.5364	25.423	22.4131	33.0843	5.11448
	82.75	0.419779																220.5	57.7166	28.7737	33.34	31.4256	25.371	20.6572	32.8807	5.29725
	83	0.419778																221	57.6591	29.2873	35.1614	34.2438	25.206	20.2959	33.6423	5.31583
	83.25	0.419794																221.5	57.5865	29.0219	32.5068	34.8988	25.301	21.0306	33.3909	5.24657
	83.5	0.419712																222	57.3317	28.9955	31.824	36.2514	25.46	21.8764	33.6231	5.15844
	83.75	0.419402																222.5	57.0735	27.8779	33.9571	37.5988	25.349	21.7476	33.9339	5.18895
	84	0.419304																223	57.2851	28.1099	31.3281	34.9143	25.355	21.7312	33.1206	5.18165
	84.25	0.419463																223.5	57.5635	27.514	30.1312	32.0808	25.335	22.5912	32.5359	5.19084
	84.5	0.418838																224	57.7615	27.5494	29.0957	28.4672	25.16	23.0925	31.8543	5.26114
	84.75	0.419222																224.5	57.1596	28.5954	30.2724	24.6545	25.126	23.1169	31.4875	5.2476
	85	0.418998																225	56.7	30.1185	30.2742	23.5261	24.699	23.0813	31.3999	5.22527
	85.25	0.418721																225.5	56.8736	30.1052	30.2999	22.576	24.916	23.8924	31.4439	5.25372
	85.5	0.417977																226	57.0844	29.3071	32.6761	24.8807	24.525	23.7701	32.0406	5.20003
	85.75	0.417237																226.5	57.141	28.5568	32.3908	27.4758	24.529	23.9228	32.3359	5.11513
	86	0.417418																227	56.7206	28.6361	32.3968	31.1853	24.988	23.7004	32.9379	4.95315
	86.25	0.417323																227.5	56.3529	27.9951	29.8963	33.5953	25.189	23.178	32.7011	4.95763
	86.5	0.416833																228	56.4502	29.1401	29.28	31.8987	25.471	22.8446	32.5141	4.96073
	86.75	0.416627																228.5	56.7461	29.5768	27.7027	31.2259	25.683	22.226	32.1934	5.07452
	87	0.416189																229	56.8329	30.5577	25.8518	29.2552	25.552	21.8213	31.6452	5.19137
	87.25	0.41597																229.5	56.606	30.0422	26.0251	27.9423	25.756	21.7739	31.3576	5.17215
	87.5	0.416043																230	56.5041	30.2265	25.8971	25.6131	25.613	21.6707	30.9208	5.23491
	87.75	0.415016																230.5	56.5733	30.6443	27.3553	25.1907	25.226	22.3545	31.2241	5.19272
	88	0.414171																231	57.099	29.3382	27.5807	24.392	24.777	22.4355	30.9371	5.32708
	88.25	0.413682																231.5	57.613	27.8031	28.1097	24.1293	24.766	23.2907	30.952	5.39232
	88.5	0.412212																232	57.312	27.6521	30.6531	26.3203	25.058	23.5955	31.7651	5.20312
	88.75	0.411347																232.5	57.0781	29.0892	30.6211	27.0543	24.937	23.7157	32.0826	5.10627
	89	0.411203																233	57.0931	30.3219	30.28	25.8738	24.893	23.6719	32.0223	5.1408
	89.25	0.410795																233.5	57.2461	30.2744	30.4861	24.7091	25.444	24.1059	32.0443	5.16743
	89.5	0.409954																234	57.3047	30.7759	30.3879	24.6284	25.998	23.1023	32.0328	5.20882
	89.75	0.408405																234.5	56.8852	30.0882	29.2888	25.2116	25.656	22.2514	31.5635	5.19777
	90	0.407783																235	57.2097	29.4582	26.6606	21.32	25.758	22.5532	30.4933	5.47462
	90.25	0.4074																235.5	56.6436	29.5915	26.14	21.9761	25.791	22.7724	30.4857	5.34749
	90.5	0.406681																236	56.1742	30.2114	27.4796	24.2416	25.363	23.1066	31.0961	5.12008
	90.75	0.406532																236.5	56.207	30.1615	30.1712	26.8784	25.011	22.2988	31.788	5.03859
	91	0.405601																237	55.8435	29.3242	31.7335	30.2763	24.599	24.0302	32.6345	4.81175
	91.25	0.404736																237.5	55.9188	29.0465	33.5458	30.5111	24.454	24.6766	33.0255	4.79478
	91.5	0.403805																238	55.6724	29.6273	34.8581	32.4329	24.07	24.0561	33.4528	4.78784
	91.75	0.403817																238.5	55.3051	30.2622	35.0501	32.9834	23.923	23.3645	33.4813	4.77169
	92	0.404346																239	55.2862	30.1287	35.011	35.3903	24.085	23.457	33.893	4.7625
	92.25	0.405225																239.5	55.3241	29.0099	32.6679	36.6209	23.925	23.4041	33.4919	4.83218
	92.5	0.406053																240	54.9376	29.127	31.0498	43.0197	24.192	23.5757	34.317	5.02142
	92.75	0.406213
	93	0.405959
	93.25	0.406513
	93.5	0.406534
	93.75	0.406212
	94	0.405881
	94.25	0.405173
	94.5	0.404309
	94.75	0.402895
	95	0.401837
	95.25	0.401354
	95.5	0.400657
	95.75	0.399593
	96	0.398995
	96.25	0.397481
	96.5	0.396278
	96.75	0.395277
	97	0.394093
	97.25	0.393356
	97.5	0.392623
	97.75	0.391643
	98	0.391162
	98.25	0.390321
	98.5	0.389541
	98.75	0.38895
	99	0.38811
	99.25	0.387751
	99.5	0.387304
	99.75	0.387122
	100	0.386944
	100.25	0.385854
	100.5	0.385817
	100.75	0.386003
	101	0.386061
	101.25	0.386602
	101.5	0.386875
	101.75	0.386876
	102	0.38672
	102.25	0.386578
	102.5	0.387611
	102.75	0.38756
	103	0.387921
	103.25	0.387823
	103.5	0.386814
	103.75	0.386677
	104	0.386172
	104.25	0.386311
	104.5	0.386227
	104.75	0.386079
	105	0.386337
	105.25	0.386451
	105.5	0.386633
	105.75	0.387034
	106	0.386925
	106.25	0.387202
	106.5	0.387115
	106.75	0.387309
	107	0.387244
	107.25	0.386829
	107.5	0.386699
	107.75	0.386948
	108	0.387702
	108.25	0.387403
	108.5	0.38737
	108.75	0.387583
	109	0.387535
	109.25	0.387594
	109.5	0.388093
	109.75	0.388621
	110	0.388879
	110.25	0.388906
	110.5	0.389295
	110.75	0.389851
	111	0.390444
	111.25	0.390895
	111.5	0.391355
	111.75	0.391746
	112	0.391619
	112.25	0.39135
	112.5	0.391205
	112.75	0.391706
	113	0.392369
	113.25	0.391897
	113.5	0.392026
	113.75	0.391899
	114	0.391959
	114.25	0.392138
	114.5	0.392929
	114.75	0.393965
	115	0.394348
	115.25	0.393916
	115.5	0.393736
	115.75	0.39458
	116	0.394741
	116.25	0.394625
	116.5	0.394837
	116.75	0.394924
	117	0.394518
	117.25	0.395234
	117.5	0.395098
	117.75	0.395522
	118	0.39442
	118.25	0.393858
	118.5	0.394056
	118.75	0.393685
	119	0.393978
	119.25	0.39549
	119.5	0.398697
	119.75	0.405387
	120	0.414843
	120.25	0.42766
	120.5	0.443894
	120.75	0.463137
	121	0.486467
	121.25	0.512905
	121.5	0.541202
	121.75	0.572156
	122	0.601918
	122.25	0.633465
	122.5	0.665316
	122.75	0.695913
	123	0.726908
	123.25	0.756966
	123.5	0.787037
	123.75	0.817126
	124	0.844768
	124.25	0.87518
	124.5	0.903258
	124.75	0.931213
	125	0.957203
	125.25	0.982469
	125.5	1.0073
	125.75	1.03034
	126	1.05164
	126.25	1.07471
	126.5	1.09464
	126.75	1.11355
	127	1.13171
	127.25	1.14998
	127.5	1.16911
	127.75	1.18782
	128	1.20773
	128.25	1.22454
	128.5	1.24209
	128.75	1.25832
	129	1.27246
	129.25	1.28693
	129.5	1.30068
	129.75	1.30956
	130	1.31583
	130.25	1.31784
	130.5	1.3201
	130.75	1.31416
	131	1.30618
	131.25	1.29669
	131.5	1.28022
	131.75	1.2594
	132	1.23936
	132.25	1.21748
	132.5	1.19309
	132.75	1.16754
	133	1.14419
	133.25	1.12096
	133.5	1.09734
	133.75	1.07598
	134	1.05941
	134.25	1.04213
	134.5	1.02522
	134.75	1.01281
	135	0.99798
	135.25	0.982587
	135.5	0.972351
	135.75	0.963229
	136	0.952852
	136.25	0.944167
	136.5	0.934674
	136.75	0.928191
	137	0.92116
	137.25	0.917965
	137.5	0.918445
	137.75	0.913867
	138	0.910816
	138.25	0.913337
	138.5	0.914353
	138.75	0.920059
	139	0.922244
	139.25	0.926057
	139.5	0.93099
	139.75	0.931074
	140	0.938594
	140.25	0.945629
	140.5	0.95113
	140.75	0.95412
	141	0.958842
	141.25	0.963644
	141.5	0.965113
	141.75	0.971075
	142	0.979066
	142.25	0.985543
	142.5	0.989681
	142.75	0.993522
	143	1.00162
	143.25	1.00663
	143.5	1.01419
	143.75	1.02844
	144	1.03798
	144.25	1.04931
	144.5	1.05475
	144.75	1.06423
	145	1.07483
	145.25	1.08194
	145.5	1.08793
	145.75	1.09937
	146	1.10355
	146.25	1.10492
	146.5	1.10694
	146.75	1.11439
	147	1.11796
	147.25	1.11733
	147.5	1.12216
	147.75	1.12524
	148	1.12174
	148.25	1.12435
	148.5	1.13023
	148.75	1.13285
	149	1.13476
	149.25	1.13906
	149.5	1.1488
	149.75	1.15196
	150	1.15745
	150.25	1.16434
	150.5	1.1692
	150.75	1.17559
	151	1.17948
	151.25	1.18347
	151.5	1.18606
	151.75	1.18525
	152	1.1896
	152.25	1.19174
	152.5	1.19457
	152.75	1.19419
	153	1.19313
	153.25	1.19408
	153.5	1.19595
	153.75	1.2014
	154	1.20642
	154.25	1.20863
	154.5	1.21255
	154.75	1.21279
	155	1.22006
	155.25	1.2254
	155.5	1.23197
	155.75	1.23182
	156	1.23043
	156.25	1.23426
	156.5	1.23556
	156.75	1.24217
	157	1.24871
	157.25	1.24968
	157.5	1.25059
	157.75	1.25313
	158	1.26294
	158.25	1.26944
	158.5	1.27419
	158.75	1.28363
	159	1.28568
	159.25	1.28831
	159.5	1.29149
	159.75	1.30047
	160	1.30622
	160.25	1.30659
	160.5	1.31015
	160.75	1.31395
	161	1.31414
	161.25	1.31723
	161.5	1.32115
	161.75	1.32278
	162	1.32162
	162.25	1.3244
	162.5	1.3258
	162.75	1.32755
	163	1.32761
	163.25	1.32766
	163.5	1.32465
	163.75	1.32458
	164	1.32512
	164.25	1.32271
	164.5	1.3192
	164.75	1.31412
	165	1.31426
	165.25	1.30943
	165.5	1.30696
	165.75	1.30655
	166	1.30224
	166.25	1.29985
	166.5	1.30028
	166.75	1.29965
	167	1.30118
	167.25	1.30024
	167.5	1.30036
	167.75	1.30004
	168	1.29796
	168.25	1.30051
	168.5	1.29973
	168.75	1.29765
	169	1.29397
	169.25	1.29361
	169.5	1.29261
	169.75	1.29413
	170	1.29411
	170.25	1.29429
	170.5	1.29533
	170.75	1.29582
	171	1.2965
	171.25	1.30136
	171.5	1.30512
	171.75	1.30681
	172	1.30705
	172.25	1.30722
	172.5	1.31087
	172.75	1.30947
	173	1.31457
	173.25	1.32076
	173.5	1.31997
	173.75	1.32271
	174	1.32177
	174.25	1.32403
	174.5	1.32683
	174.75	1.32782
	175	1.32964
	175.25	1.32506
	175.5	1.32112
	175.75	1.32144
	176	1.31861
	176.25	1.31998
	176.5	1.31892
	176.75	1.32216
	177	1.32123
	177.25	1.32414
	177.5	1.3288
	177.75	1.33003
	178	1.3346
	178.25	1.33661
	178.5	1.33929
	178.75	1.34184
	179	1.34291
	179.25	1.3461
	179.5	1.35103
	179.75	1.35343
	180	1.35823
	180.25	1.36072
	180.5	1.36537
	180.75	1.3639
	181	1.36736
	181.25	1.36974
	181.5	1.37208
	181.75	1.37164
	182	1.37616
	182.25	1.37688
	182.5	1.38213
	182.75	1.38882
	183	1.39686
	183.25	1.4007
	183.5	1.40046
	183.75	1.40603
	184	1.40812
	184.25	1.41195
	184.5	1.41762
	184.75	1.41837
	185	1.41577
	185.25	1.41688
	185.5	1.41716
	185.75	1.42393
	186	1.42435
	186.25	1.42643
	186.5	1.423
	186.75	1.4205
	187	1.41741
	187.25	1.41725
	187.5	1.41438
	187.75	1.41926
	188	1.41673
	188.25	1.41773
	188.5	1.41389
	188.75	1.4163
	189	1.42222
	189.25	1.42474
	189.5	1.42726
	189.75	1.4329
	190	1.42943
	190.25	1.43084
	190.5	1.42821
	190.75	1.43321
	191	1.43329
	191.25	1.42927
	191.5	1.43313
	191.75	1.43433
	192	1.43257
	192.25	1.43368
	192.5	1.4343
	192.75	1.43596
	193	1.43263
	193.25	1.43479
	193.5	1.43343
	193.75	1.43202
	194	1.43046
	194.25	1.43337
	194.5	1.4359
	194.75	1.43862
	195	1.44186
	195.25	1.44801
	195.5	1.44834
	195.75	1.45692
	196	1.46145
	196.25	1.46844
	196.5	1.46748
	196.75	1.46892
	197	1.46792
	197.25	1.46831
	197.5	1.46294
	197.75	1.46438
	198	1.46257
	198.25	1.46303
	198.5	1.45664
	198.75	1.45683
	199	1.45339
	199.25	1.45561
	199.5	1.45596
	199.75	1.46068
	200	1.46007
	200.25	1.46001
	200.5	1.45891
	200.75	1.46404
	201	1.46743
	201.25	1.47338
	201.5	1.47558
	201.75	1.47598
	202	1.48045
	202.25	1.48089
	202.5	1.4806
	202.75	1.47873
	203	1.47785
	203.25	1.47779
	203.5	1.47076
	203.75	1.46638
	204	1.46729
	204.25	1.46212
	204.5	1.46268
	204.75	1.46413
	205	1.46347
	205.25	1.46426
	205.5	1.4636
	205.75	1.4723
	206	1.47466
	206.25	1.47709
	206.5	1.48004
	206.75	1.48655
	207	1.48808
	207.25	1.48991
	207.5	1.49144
	207.75	1.49158
	208	1.48852
	208.25	1.49087
	208.5	1.49141
	208.75	1.49218
	209	1.48819
	209.25	1.48563
	209.5	1.48659
	209.75	1.48527
	210	1.48396
	210.25	1.48314
	210.5	1.48102
	210.75	1.47786
	211	1.47908
	211.25	1.47787
	211.5	1.48072
	211.75	1.4796
	212	1.47948
	212.25	1.48093
	212.5	1.48162
	212.75	1.4835
	213	1.48469
	213.25	1.48641
	213.5	1.49131
	213.75	1.4924
	214	1.49316
	214.25	1.49427
	214.5	1.49587
	214.75	1.49868
	215	1.49795
	215.25	1.50202
	215.5	1.49992
	215.75	1.49766
	216	1.49955
	216.25	1.49978
	216.5	1.50201
	216.75	1.49915
	217	1.49415
	217.25	1.49298
	217.5	1.48698
	217.75	1.48347
	218	1.48132
	218.25	1.47653
	218.5	1.47764
	218.75	1.47191
	219	1.47594
	219.25	1.47572
	219.5	1.4769
	219.75	1.478
	220	1.48272
	220.25	1.4849
	220.5	1.48541
	220.75	1.48412
	221	1.48658
	221.25	1.48264
	221.5	1.48466
	221.75	1.48622
	222	1.48287
	222.25	1.48034
	222.5	1.47933
	222.75	1.47964
	223	1.47946
	223.25	1.48017
	223.5	1.48187
	223.75	1.48419
	224	1.48259
	224.25	1.48541
	224.5	1.48581
	224.75	1.48435
	225	1.4798
	225.25	1.47686
	225.5	1.47134
	225.75	1.4747
	226	1.47469
	226.25	1.47427
	226.5	1.47508
	226.75	1.47507
	227	1.47608
	227.25	1.47699
	227.5	1.47937
	227.75	1.48498
	228	1.48158
	228.25	1.47979
	228.5	1.48081
	228.75	1.47862
	229	1.47756
	229.25	1.47617
	229.5	1.48028
	229.75	1.48163
	230	1.48009
	230.25	1.47858
	230.5	1.48135
	230.75	1.47831
	231	1.48251
	231.25	1.48495
	231.5	1.4861
	231.75	1.48532
	232	1.48657
	232.25	1.48731
	232.5	1.48944
	232.75	1.48611
	233	1.48801
	233.25	1.48903
	233.5	1.4921
	233.75	1.49528
	234	1.4972
	234.25	1.49942
	234.5	1.50194
	234.75	1.50214
	235	1.50341
	235.25	1.50312
	235.5	1.50355
	235.75	1.49854
	236	1.497
	236.25	1.49575
	236.5	1.49404
	236.75	1.49261
	237	1.49366
	237.25	1.4937
	237.5	1.49496
	237.75	1.49812
	238	1.49954
	238.25	1.49622
	238.5	1.49627
	238.75	1.49129
	239	1.49405
	239.25	1.49249
	239.5	1.4971
	239.75	1.49833
	240	1.49009
	240.25	1.49214
	240.5	1.49319
	240.75	1.49139
	241	1.49339
	241.25	1.48784
	241.5	1.48911
	241.75	1.4838
	242	1.48109
	242.25	1.4836
	242.5	1.48213
	242.75	1.48142
	243	1.48117
	243.25	1.48244
	243.5	1.48372
	243.75	1.48388
	244	1.48022
	244.25	1.47948
	244.5	1.47904
	244.75	1.47708
	245	1.47992
	245.25	1.48143
	245.5	1.48208
	245.75	1.48428
	246	1.48311
	246.25	1.48885
	246.5	1.49109
	246.75	1.49493
	247	1.49615
	247.25	1.49548
	247.5	1.49549
	247.75	1.49399
	248	1.48783
	248.25	1.48373
	248.5	1.47916
	248.75	1.46815
	249	1.45146
	249.25	1.43431
	249.5	1.41196
	249.75	1.38416
	250	1.35091
	250.25	1.31883
	250.5	1.284
	250.75	1.24428
	251	1.20291
	251.25	1.15862
	251.5	1.11217
	251.75	1.07241
	252	1.02832
	252.25	0.989415
	252.5	0.94945
	252.75	0.908996
	253	0.867792
	253.25	0.834037
	253.5	0.798816
	253.75	0.765851
	254	0.735311
	254.25	0.709509
	254.5	0.677036
	254.75	0.6469
	255	0.619547
	255.25	0.589102
	255.5	0.562917
	255.75	0.538993
	256	0.515772
	256.25	0.486532
	256.5	0.463005
	256.75	0.450506
	257	0.434875
	257.25	0.41736
	257.5	0.411849
	257.75	0.394456
	258	0.383271
	258.25	0.37487
	258.5	0.367268
	258.75	0.360186
	259	0.347858
	259.25	0.337714
	259.5	0.330058
	259.75	0.316471
	260	0.312773
	260.25	0.307475
	260.5	0.301071
	260.75	0.291145
	261	0.285243
	261.25	0.275914
	261.5	0.271891
	261.75	0.264749
	262	0.264573
	262.25	0.257803
	262.5	0.254094
	262.75	0.252263
	263	0.251636
	263.25	0.246598
	263.5	0.243108
	263.75	0.237102
	264	0.234234
	264.25	0.226463
	264.5	0.223445
	264.75	0.218887
	265	0.215593
	265.25	0.209129
	265.5	0.206126
	265.75	0.20786
	266	0.208232
	266.25	0.20631
	266.5	0.198688
	266.75	0.198682
	267	0.190853
	267.25	0.183659
	267.5	0.185078
	267.75	0.177578
	268	0.175316
	268.25	0.164658
	268.5	0.158344
	268.75	0.160029
	269	0.154407
	269.25	0.157376
	269.5	0.157282
	269.75	0.157558
	270	0.160165
	270.25	0.149524
	270.5	0.153031
	270.75	0.155261
	271	0.155151
	271.25	0.154419
	271.5	0.150978
	271.75	0.14786
	272	0.14518
	272.25	0.140695
	272.5	0.143636
	272.75	0.143073
	273	0.143092
	273.25	0.141483
	273.5	0.143181
	273.75	0.148894
	274	0.15615
	274.25	0.158912
	274.5	0.16644
	274.75	0.173754
	275	0.178842
	275.25	0.183835
	275.5	0.183166
	275.75	0.183955
	276	0.18252
	276.25	0.181071
	276.5	0.182583
	276.75	0.18495
	277	0.181913
	277.25	0.182357
	277.5	0.181409
	277.75	0.186191
	278	0.187478
	278.25	0.193326
	278.5	0.194474
	278.75	0.198912
	279	0.19658
	279.25	0.20261
	279.5	0.206078
	279.75	0.209234
	280	0.213512
	280.25	0.215854
	280.5	0.22083
	280.75	0.228689
	281	0.225406
	281.25	0.230759
	281.5	0.231589
	281.75	0.233809
	282	0.237562
	282.25	0.239368
	282.5	0.245172
	282.75	0.237525
	283	0.234283
	283.25	0.230873
	283.5	0.232425
	283.75	0.225863
	284	0.222323
	284.25	0.221597
	284.5	0.2175
	284.75	0.213379
	285	0.217184
	285.25	0.213823
	285.5	0.216365
	285.75	0.212198
	286	0.216546
	286.25	0.218449
	286.5	0.218097
	286.75	0.219586
	287	0.223363
	287.25	0.224059
	287.5	0.224818
	287.75	0.225692
	288	0.224229
	288.25	0.225909
	288.5	0.22186
	288.75	0.223276
	289	0.221196
	289.25	0.219267
	289.5	0.215194
	289.75	0.215992
	290	0.213893
	290.25	0.214451
	290.5	0.213264
	290.75	0.21249
	291	0.208173
	291.25	0.2046
	291.5	0.198658
	291.75	0.19156
	292	0.184926
	292.25	0.183821
	292.5	0.181142
	292.75	0.177869
	293	0.181719
	293.25	0.179534
	293.5	0.183128
	293.75	0.183347
	294	0.187544
	294.25	0.192916
	294.5	0.18915
	294.75	0.186899
	295	0.185603
	295.25	0.181214
	295.5	0.181702
	295.75	0.185354
	296	0.18672
	296.25	0.186498
	296.5	0.179729
	296.75	0.179631
	297	0.177687
	297.25	0.172891
	297.5	0.170127
	297.75	0.161874
	298	0.150555
	298.25	0.143883
	298.5	0.13759
	298.75	0.134131
	299	0.135139
	299.25	0.129202
	299.5	0.125303
	299.75	0.124915
	300	0.120872
	300.25	0.114852
	300.5	0.110193
	300.75	0.10687
	301	0.104588
	301.25	0.0963254
	301.5	0.0982423
	301.75	0.0959814
	302	0.0861162
	302.25	0.0826514
	302.5	0.0823856
	302.75	0.0824633
	303	0.08383
	303.25	0.080213
	303.5	0.0827912
	303.75	0.0757105
	304	0.0768287
	304.25	0.0780024
	304.5	0.0797319
	304.75	0.0788158
	305	0.0776013
	305.25	0.0719277
	305.5	0.0721774
	305.75	0.0666566
	306	0.0644108
	306.25	0.0632409
	306.5	0.0680397
	306.75	0.0672041
	307	0.0702659
	307.25	0.0707872
	307.5	0.070836
	307.75	0.0688408
	308	0.0693569
	308.25	0.0750813
	308.5	0.070119
	308.75	0.0630865
	309	0.0644953
	309.25	0.0589479
	309.5	0.0525946
	309.75	0.0483302
	310	0.0552681
	310.25	0.0527193
	310.5	0.0504024
	310.75	0.053765
	311	0.0522988
	311.25	0.048896
	311.5	0.0525663
	311.75	0.0566769
	312	0.0578716
	312.25	0.0454946
	312.5	0.0462423
	312.75	0.0435495
	313	0.0387643
	313.25	0.0471511
	313.5	0.0462202
	313.75	0.0426988
	314	0.0418218
	314.25	0.0471721
	314.5	0.0517403
	314.75	0.050198
	315	0.0514472
	315.25	0.0553697
	315.5	0.0490739
	315.75	0.0503894
	316	0.0479194
	316.25	0.0530121
	316.5	0.0514037
	316.75	0.0494341
	317	0.052268
	317.25	0.0552396
	317.5	0.0536683
	317.75	0.0482008
	318	0.0442975
	318.25	0.0451276
	318.5	0.0360245
	318.75	0.0328882
	319	0.038936
	319.25	0.0311139
	319.5	0.0254807
	319.75	0.0237232
	320	0.0286687
	320.25	0.0345245
	320.5	0.0345293
	320.75	0.0314869
	321	0.03215
	321.25	0.0275149
	321.5	0.0317594
	321.75	0.030845
	322	0.034603
	322.25	0.0344318
	322.5	0.0325501
	322.75	0.0319111
	323	0.0361051
	323.25	0.0351263
	323.5	0.0383685
	323.75	0.0343197
	324	0.0326594
	324.25	0.029105
	324.5	0.029968
	324.75	0.0266193
	325	0.0241658
	325.25	0.0257275
	325.5	0.0269182
	325.75	0.0191754
	326	0.0208029
	326.25	0.0248686
	326.5	0.0217386
	326.75	0.0187312
	327	0.0160643
	327.25	0.0176882
	327.5	0.0190482
	327.75	0.0121394
	328	0.0088663
	328.25	0.0100449
	328.5	0.00520357
	328.75	0.00540779
	329	0.00355501
	329.25	0.00609586
	329.5	0.00469775
	329.75	-0.00199654
	330	0.00520646
	330.25	0.0127156
	330.5	0.011762
	330.75	0.0177766
	331	0.0214009
	331.25	0.0201645
	331.5	0.01939
	331.75	0.0272377
	332	0.0340117
	332.25	0.0400954
	332.5	0.0416062
	332.75	0.0463269
	333	0.0470616
	333.25	0.0526103
	333.5	0.0599331
	333.75	0.0683733
	334	0.0674449
	334.25	0.0727312
	334.5	0.0736998
	334.75	0.0788784
	335	0.0824545
	335.25	0.0915451
	335.5	0.0957055
	335.75	0.0991294
	336	0.100863
	336.25	0.105305
	336.5	0.104071
	336.75	0.0990723
	337	0.101137
	337.25	0.101751
	337.5	0.0949431
	337.75	0.0911521
	338	0.0875561
	338.25	0.0865161
	338.5	0.0833585
	338.75	0.081253
	339	0.0843663
	339.25	0.0810783
	339.5	0.0762055
	339.75	0.0741452
	340	0.0716166
	340.25	0.0715999
	340.5	0.0680644
	340.75	0.0660937
	341	0.0631089
	341.25	0.0579974
	341.5	0.052702
	341.75	0.0539483
	342	0.0504317
	342.25	0.0496601
	342.5	0.048008
	342.75	0.0450789
	343	0.0419037
	343.25	0.0391603
	343.5	0.0362532
	343.75	0.0360493
	344	0.0309934
	344.25	0.0286246
	344.5	0.0281015
	344.75	0.0266189
	345	0.0213144
	345.25	0.0171536
	345.5	0.0157278
	345.75	0.0143568
	346	0.00871525
	346.25	0.00750109
	346.5	0.0074105
	346.75	0.00213773
	347	-0.00284021
	347.25	-0.000678785
	347.5	-0.000460417
	347.75	-0.00190462
	348	-0.0027834
	348.25	-0.002222
	348.5	-0.00535723
	348.75	-0.0059215
	349	-0.00438236
	349.25	-0.0036654
	349.5	-0.00499752
	349.75	-0.00654342
	350	-0.00626194
	350.25	-0.00800962
	350.5	-0.00811844
	350.75	-0.00670038
	351	-0.00542921
	351.25	-0.00678808
	351.5	-0.00570097
	351.75	-0.00651194
	352	-0.00498795
	352.25	-0.00607238
	352.5	-0.00450118
	352.75	-0.00365705
	353	-0.00225065
	353.25	-0.00282928
	353.5	-0.00654316
	353.75	-0.00910968
	354	-0.0111601
	354.25	-0.010349
	354.5	-0.011223
	354.75	-0.0123086
	355	-0.0162692
	355.25	-0.0191796
	355.5	-0.0220765
	355.75	-0.0201768
	356	-0.0218492
	356.25	-0.0223574
	356.5	-0.0252902
	356.75	-0.0253703
	357	-0.0242821
	357.25	-0.0210732
	357.5	-0.0208044
	357.75	-0.0216416
	358	-0.0236139
	358.25	-0.0210794
	358.5	-0.0201443
	358.75	-0.019145
	359	-0.0202845
	359.25	-0.0202657
	359.5	-0.0211649
	359.75	-0.0206394
	360	-0.0211349
	360.25	-0.0200868
	360.5	-0.0210359
	360.75	-0.0218231
	361	-0.0211891
	361.25	-0.0202817
	361.5	-0.024877
	361.75	-0.0256882
	362	-0.0277209
	362.25	-0.0253318
	362.5	-0.0255266
	362.75	-0.0274645
	363	-0.0272704
	363.25	-0.0283412
	363.5	-0.0287638
	363.75	-0.0273136
	364	-0.0282715
	364.25	-0.0267843
	364.5	-0.0277875
	364.75	-0.0260987
	365	-0.0263537
	365.25	-0.0266843
	365.5	-0.0266016
	365.75	-0.0272155
	366	-0.026562
	366.25	-0.0248922
	366.5	-0.0264393
	366.75	-0.0274249
	367	-0.0304355
	367.25	-0.0297741
	367.5	-0.0285088
	367.75	-0.0290744
	368	-0.0280447
	368.25	-0.0295023
	368.5	-0.0322792
	368.75	-0.0307335
	369	-0.0315847
	369.25	-0.0313553
	369.5	-0.0320423
	369.75	-0.0343766
	370	-0.0356363
	370.25	-0.0370935
	370.5	-0.0367795
	370.75	-0.035073
	371	-0.0378497
	371.25	-0.0366362
	371.5	-0.0350573
	371.75	-0.033325
	372	-0.0333876
	372.25	-0.0325326
	372.5	-0.0332653
	372.75	-0.0331184
	373	-0.0323823
	373.25	-0.029551
	373.5	-0.0282456
	373.75	-0.0280405
	374	-0.0280386
	374.25	-0.0264178
	374.5	-0.0254428
	374.75	-0.0220557
	375	-0.0194358
	375.25	-0.0198758
	375.5	-0.0202478
	375.75	-0.0216347
	376	-0.0207489
	376.25	-0.0203373
	376.5	-0.0205327
	376.75	-0.0197015
	377	-0.0218251
	377.25	-0.0228232
	377.5	-0.0221528
	377.75	-0.0221657
	378	-0.0214044
	378.25	-0.0204865
	378.5	-0.018993
	378.75	-0.0180695
	379	-0.0181321
	379.25	-0.016897
	379.5	-0.0155924
	379.75	-0.0159179
	380	-0.0138365
	380.25	-0.0126311
	380.5	-0.0123353
	380.75	-0.0130334
	381	-0.0121739
	381.25	-0.0129798
	381.5	-0.0115153
	381.75	-0.0123595
	382	-0.0114525
	382.25	-0.010347
	382.5	-0.00917642
	382.75	-0.00904844
	383	-0.00834652
	383.25	-0.00781712
	383.5	-0.00441159
	383.75	-0.00395401
	384	-0.00151449
	384.25	-3.33042e-05
	384.5	0.000925141
	384.75	0.000596821
	385	0.000670086
	385.25	-0.000631821
	385.5	-0.000686137
	385.75	-0.00205556
	386	-0.00161153
	386.25	-0.00283268
	386.5	-0.00345187
	386.75	-0.00457111
	387	-0.00444785
	387.25	-0.0049902
	387.5	-0.00338167
	387.75	-0.00334131
	388	-0.00279594
	388.25	-0.00371446
	388.5	-0.00356096
	388.75	-0.00353699
	389	-0.00396853
	389.25	-0.003964
	389.5	-0.00462828
	389.75	-0.00455717
	390	-0.00289998
	390.25	-0.00286058
	390.5	-0.00165986
	390.75	-0.00053995
	391	-0.000634852
	391.25	-0.00048772
	391.5	-0.000969229
	391.75	0.00176236
	392	0.00157796
	392.25	0.000753305
	392.5	0.00113801
	392.75	0.00052018
	393	0.00118581
	393.25	0.00221807
	393.5	0.00226119
	393.75	0.00373739
	394	0.00305853
	394.25	0.00207378
	394.5	0.00242545
	394.75	0.00207822
	395	0.00067126
	395.25	-0.000635767
	395.5	-0.000362654
	395.75	0.000129407
	396	-5.14399e-05
	396.25	0.000230461
	396.5	0.00233091
	396.75	0.00217454
	397	0.00346268
	397.25	0.00576637
	397.5	0.0075101
	397.75	0.00754618
	398	0.00849793
	398.25	0.00821773
	398.5	0.00725878
	398.75	0.00725342
	399	0.00804782
	399.25	0.00807476
	399.5	0.00818493
	399.75	0.00768185
	400	0.00758114
	400.25	0.00716843
	400.5	0.00695932
	400.75	0.0082003
	401	0.00860012
	401.25	0.00890204
	401.5	0.0084938
	401.75	0.00950305
	402	0.0102621
	402.25	0.0118558
	402.5	0.0126351
	402.75	0.0137746
	403	0.0150674
	403.25	0.0164065
	403.5	0.0167217
	403.75	0.0173222
	404	0.0170357
	404.25	0.017142
	404.5	0.016266
	404.75	0.0154366
	405	0.0165639
	405.25	0.0157525
	405.5	0.0153996
	405.75	0.0151159
	406	0.0147378
	406.25	0.0157073
	406.5	0.0166021
	406.75	0.016287
	407	0.0188206
	407.25	0.0193197
	407.5	0.0197138
	407.75	0.0199077
	408	0.0204153
	408.25	0.0219196
	408.5	0.0216612
	408.75	0.0214237
	409	0.0243174
	409.25	0.0236652
	409.5	0.0237309
	409.75	0.0241186
	410	0.0247666
	410.25	0.0254349
	410.5	0.0247398
	410.75	0.0252594
	411	0.0266736
	411.25	0.0265608
	411.5	0.0267346
	411.75	0.0279961
	412	0.0288534
	412.25	0.0307527
	412.5	0.0319055
	412.75	0.033898
	413	0.0343415
	413.25	0.0338601
	413.5	0.0333771
	413.75	0.0351538
	414	0.0349151
	414.25	0.0346215
	414.5	0.0325472
	414.75	0.03227
	415	0.0325227
	415.25	0.0335861
	415.5	0.0335477
	415.75	0.033298
	416	0.0314097
	416.25	0.0307266
	416.5	0.0303854
	416.75	0.0295501
	417	0.0272853
	417.25	0.0252025
	417.5	0.0214853
	417.75	0.0191303
	418	0.0166968
	418.25	0.0147247
	418.5	0.0131022
	418.75	0.0113098
	419	0.0105011
	419.25	0.00890685
	419.5	0.00761816
	419.75	0.00765688
	420	0.00753532
	420.25	0.00732206
	420.5	0.00666183
	420.75	0.00538913
	421	0.00470449
	421.25	0.00455657
	421.5	0.00472379
	421.75	0.00465678
	422	0.00375597
	422.25	0.00264075
	422.5	0.00288035
	422.75	0.00416551
	423	0.00452731
	423.25	0.00516544
	423.5	0.00519376
	423.75	0.00663665
	424	0.00775823
	424.25	0.00790575
	424.5	0.00876795
	424.75	0.00918314
	425	0.00880229
	425.25	0.00931156
	425.5	0.00908927
	425.75	0.00897786
	426	0.00833759
	426.25	0.00785534
	426.5	0.00857858
	426.75	0.00877339
	427	0.00972661
	427.25	0.0111138
	427.5	0.0114182
	427.75	0.0117357
	428	0.0122187
	428.25	0.0131812
	428.5	0.0130237
	428.75	0.0146975
	429	0.0156928
	429.25	0.0157789
	429.5	0.0161324
	429.75	0.0170123
	430	0.0179637
	430.25	0.0187986
	430.5	0.0198825
	430.75	0.020007
	431	0.0200112
	431.25	0.0201957
	431.5	0.0205389
	431.75	0.0193001
	432	0.0184359
	432.25	0.0183202
	432.5	0.0177337
	432.75	0.0172632
	433	0.0183963
	433.25	0.0181349
	433.5	0.0181988
	433.75	0.0182231
	434	0.0189318
	434.25	0.0186645
	434.5	0.018325
	434.75	0.0185737
	435	0.0182607
	435.25	0.0179142
	435.5	0.017624
	435.75	0.0170913
	436	0.0173843
	436.25	0.0179383
	436.5	0.0185801
	436.75	0.0193532
	437	0.0201919
	437.25	0.020359
	437.5	0.0208442
	437.75	0.0213829
	438	0.0223769
	438.25	0.022248
	438.5	0.021778
	438.75	0.0224845
	439	0.0227484
	439.25	0.0222555
	439.5	0.0232604
	439.75	0.022546
	440	0.0226127
	440.25	0.0218972
	440.5	0.0214513
	440.75	0.0218992
	441	0.0214542
	441.25	0.0205236
	441.5	0.0210252
	441.75	0.0202854
	442	0.021372
	442.25	0.0213432
	442.5	0.0213402
	442.75	0.0229349
	443	0.0245662
	443.25	0.0242094
	443.5	0.0255286
	443.75	0.025462
	444	0.0256793
	444.25	0.0245841
	444.5	0.0251393
	444.75	0.025324
	445	0.0244628
	445.25	0.0226487
	445.5	0.0240592
	445.75	0.024283
	446	0.024242
	446.25	0.0240892
	446.5	0.0247457
	446.75	0.0249624
	447	0.0264283
	447.25	0.0267095
	447.5	0.0275355
	447.75	0.0280808
	448	0.027965
	448.25	0.0281939
	448.5	0.0284601
	448.75	0.02826
	449	0.0275063
	449.25	0.02692
	449.5	0.0267685
	449.75	0.0270511
	450	0.0261144
	450.25	0.0269731
	450.5	0.0268381
	450.75	0.0268243
	451	0.0270362
	451.25	0.0276863
	451.5	0.0267092
	451.75	0.026082
	452	0.0251566
	452.25	0.025271
	452.5	0.024215
	452.75	0.024435
	453	0.0250403
	453.25	0.0252724
	453.5	0.0246624
	453.75	0.0254851
	454	0.0259947
	454.25	0.0274843
	454.5	0.0279797
	454.75	0.0278551
	455	0.0275861
	455.25	0.0274348
	455.5	0.0274872
	455.75	0.0277911
	456	0.0275334
	456.25	0.0281944
	456.5	0.0274315
	456.75	0.0275951
	457	0.0276301
	457.25	0.0272403
	457.5	0.0273668
	457.75	0.0278736
	458	0.0275546
	458.25	0.0282295
	458.5	0.0280335
	458.75	0.0274405
	459	0.0274757
	459.25	0.028505
	459.5	0.030203
	459.75	0.0297974
	460	0.0285452
	460.25	0.0293819
	460.5	0.0293916
	460.75	0.0300882
	461	0.0303062
	461.25	0.0302053
	461.5	0.0295625
	461.75	0.0295174
	462	0.0302475
	462.25	0.032086
	462.5	0.0321101
	462.75	0.0321276
	463	0.0317318
	463.25	0.0327913
	463.5	0.0320545
	463.75	0.0323525
	464	0.0325337
[truncated: 168 more rows]
