# Supplementary material for: Fluidics system for resolving concentration-dependent effects of dissolved gases on tissue metabolism
Source: eLife. 2021 Nov 4;10:e66716. doi: 10.7554/eLife.66716 (PMC8660022; doi:10.7554/eLife.66716)
Supplement: Figure 5—source data 1. [file elife-66716-fig5-data1.xlsx]

## Sheet: Fig 5
		Retinal Experiments	Retinal Recoveries	Islet Experiments	Islet Recoveries
		C2 121219	0.912789	062409 M	0.61829
		C3 121219	0.854921	072408 M	0.622829
		C1 010220	0.778344	110217	0.42
		C2 010220	0.807556
		C3 010220	0.916864
		C4 031320	0.73635
		AVE	0.834471		0.553706
		SE	0.0299127		0.066866
					ttest
					0.0345625
