# Supplementary material for: Fluidics system for resolving concentration-dependent effects of dissolved gases on tissue metabolism
Source: eLife. 2021 Nov 4;10:e66716. doi: 10.7554/eLife.66716 (PMC8660022; doi:10.7554/eLife.66716)
Supplement: Figure 6—source data 1. [file elife-66716-fig6-data1.xlsx]

## Sheet: Fig. 6A
												Normalized								H2S Concentration Profile
	Time, hours	Time, hrs	9/29/2020, CH1	9/29/2020, CH2	9/20	Average	SE			9/17/2020, CH3	9/17/2020, CH4	9/17/2020, CH3	9/17/2020, CH4	Average	SE		ttest		Time, min	Time, Hours	92920, CH1	92920, CH2	91720, Ch2	H2S, uM
	-0.25	-3.25	0.0203998	0.0211158	0.0395087	0.0270081	0.00625372		-0.25	0.215	0.219	0.0464865	0.0403142	0.0434003	0.00308616				60	1	0	0	0	0
	-0.166667	-3.16667	0.0253154	0.0231162	0.0395087	0.0293135	0.005137		-0.166667	0.142	0.207	0.0307027	0.0381052	0.0344039	0.00370124				61	1.01667	0.00978333	0.0170667	0.0170667	0.0146389
	-0.0833333	-3.08333	0.0410454	0.0175595	0.0481064	0.0355704	0.00923329		-0.0833333	0.223	0.27	0.0482162	0.0497024	0.0489593	0.000743091				62	1.03333	0.0195667	0.0341333	0.0341333	0.0292778
	0	-3	0.0390791	0.036008	0.0429887	0.0393586	0.00202001		0	0.215	0.215	0.0464865	0.0395778	0.0430322	0.00345433				63	1.05	0.02935	0.0512	0.0512	0.0439167
	0.166667	-2.83333	0.437244	0.231162	0.138178	0.268862	0.0883667		0.166667	0.859	0.817	0.18573	0.150396	0.168063	0.017667				64	1.06667	0.0391333	0.0682667	0.0682667	0.0585556
	0.333333	-2.66667	0.648124	0.524116	0.42129	0.531177	0.0655765		0.333333	1.734	2.11	0.374919	0.388415	0.381667	0.00674806				65	1.08333	0.0489167	0.0853333	0.0853333	0.0731944
	0.5	-2.5	0.971326	0.725717	0.739816	0.812286	0.0796238		0.5	3.756	3.74	0.812108	0.68847	0.750289	0.0618189				66	1.1	0.0587	0.1024	0.1024	0.0878333
	0.666667	-2.33333	0.955841	0.99022	0.989355	0.978472	0.0113182		0.666667	4.599	5.225	0.994378	0.961833	0.978106	0.0162725				67	1.11667	0.0684833	0.119467	0.119467	0.102472
	0.833333	-2.16667	1.00746	0.967993	1.00061	0.992021	0.0121752		0.833333	4.619	5.334	0.998703	0.981899	0.990301	0.0084021		0.462718		68	1.13333	0.0782667	0.136533	0.136533	0.117111
	1	-2	1.0367	1.04179	1.01003	1.02951	0.00984811		1	4.563	5.448	0.986595	1.00288	0.994739	0.00814469		0.0451222		69	1.15	0.08805	0.1536	0.1536	0.13175
	1.16667	-1.83333	1.0603	1.00778	1.00061	1.0229	0.0188145		1.5	4.66	5.409	1.00757	0.995705	1.00164	0.00593142		0.226236		70	1.16667	0.0978333	0.170667	0.170667	0.146389
	1.33333	-1.66667	1.02982	1.01045	1.01269	1.01765	0.00611844		2	4.652	5.44	1.00584	1.00141	1.00362	0.00221327		0.0902512		71	1.18333	0.107617	0.187733	0.187733	0.161028
	1.5	-1.5	1.02319	1.08046	0.992016	1.03189	0.0259003		2.08333	4.133	5.557	0.893622	1.02295	0.958285	0.0646637		0.149216		72	1.2	0.1174	0.2048	0.2048	0.175667
	1.66667	-1.33333	1.07087	1.06935	1.02027	1.05349	0.0166197		2.16667	4.725	5.479	1.02162	1.00859	1.01511	0.00651554		0.0896632		73	1.21667	0.127183	0.221867	0.221867	0.190306
	1.83333	-1.16667	1.06497	1.11358	1.03501	1.07118	0.0228948		2.25	4.473	5.713	0.967135	1.05167	1.0094	0.0422654		0.124003		74	1.23333	0.136967	0.238933	0.238933	0.204944
	2	-1	1.11584	1.26828	1.04442	1.14285	0.0660184		2.41667	4.676	5.608	1.01103	1.03234	1.02168	0.0106551		0.125934		75	1.25	0.14675	0.256	0.256	0.219583
	2.16667	-0.833333	0.986072	1.28317	1.10788	1.12571	0.0862278		2.58333	4.538	5.456	0.981189	1.00436	0.992773	0.0115837		0.159715		76	1.26667	0.156533	0.273067	0.273067	0.234222
	2.33333	-0.666667	0.994675	1.28117	1.17298	1.14961	0.0835264		2.75	4.676	5.628	1.01103	1.03602	1.02352	0.0124959		0.164126		77	1.28333	0.166317	0.290133	0.290133	0.248861
	2.5	-0.5	1.1129	1.30051	1.20491	1.20611	0.0541633		2.91667	4.623	5.424	0.999568	0.998466	0.999017	0.000550796		0.0297346		78	1.3	0.1761	0.3072	0.3072	0.2635
	2.66667	-0.333333	1.18024	1.3623	1.19202	1.24485	0.0588233		3.08333	4.571	5.198	0.988324	0.956863	0.972594	0.0157305		0.0191384		79	1.31667	0.185883	0.324267	0.324267	0.278139
	2.83333	-0.166667	1.34049	1.32629	1.22968	1.29882	0.0348116		3.25	4.66	5.342	1.00757	0.983371	0.995469	0.0120982		0.00351287		80	1.33333	0.195667	0.341333	0.341333	0.292778
	3	0	1.33852	1.3134	1.2262	1.29271	0.0340347		3.41667	4.255	5.217	0.92	0.960361	0.94018	0.0201804		0.00237191		81	1.35	0.20545	0.3584	0.3584	0.307417
	3.33333	0.333333	1.32279	1.36497	1.23992	1.30923	0.036731		3.58333	4.473	5.436	0.967135	1.00067	0.983905	0.0167699		0.00348901		82	1.36667	0.215233	0.375467	0.375467	0.322056
	3.66667	0.666667	1.29354	1.39275	1.22027	1.30219	0.0499802		3.75	4.607	5.147	0.996108	0.947475	0.971792	0.0243166		0.00800034		83	1.38333	0.225017	0.392533	0.392533	0.336694
	4	1	1.2729	1.34852	1.19632	1.27258	0.0439386		3.91667	4.356	5.44	0.941838	1.00141	0.971625	0.0297867		0.00795228		84	1.4	0.2348	0.4096	0.4096	0.351333
	4.33333	1.33333	1.21145	1.3283	1.17728	1.23901	0.0457204		4.08333	4.599	5.549	0.994378	1.02148	1.00793	0.013549		0.0153777		85	1.41667	0.244583	0.426667	0.426667	0.365972
	4.66667	1.66667	1.14411	1.36052	1.23746	1.24737	0.0626696		4.25	4.518	5.424	0.976865	0.998466	0.987665	0.0108006		0.0247772		86	1.43333	0.254367	0.443733	0.443733	0.380611
	5	2	1.1129	1.26828	1.26653	1.2159	0.0515061		4.58333	4.652	5.62	1.00584	1.03455	1.02019	0.0143542		0.0311016		87	1.45	0.26415	0.4608	0.4608	0.39525
	5.08333	2.08333	0.923644	1.06668	1.0915	1.02728	0.0523095		4.91667	4.563	5.463	0.986595	1.00565	0.99612	0.00952531		0.338775		88	1.46667	0.273933	0.469333	0.477867	0.407044
	5.58333	2.58333	0.924381	1.09802	0.945752	0.989385	0.0546675		5.25	4.607	5.6	0.996108	1.03086	1.01349	0.0173782		0.379539		89	1.48333	0.283717	0.469333	0.494933	0.415994
	6.08333	3.08333	0.723333	0.95599	0.870215	0.849846	0.0679302		5.58333	4.619	5.538	0.998703	1.01945	1.00908	0.0103744		0.0841073		90	1.5	0.2935	0.469333	0.512	0.424944
	6.58333	3.58333	0.961494	0.844632	0.850358	0.885495	0.0380357		5.91667	4.733	5.393	1.02335	0.992759	1.00806	0.015296		0.0466119		91	1.51667	0.303283	0.469333	0.512	0.428206
																			92	1.53333	0.313067	0.469333	0.512	0.431467
																			93	1.55	0.32285	0.469333	0.512	0.434728
																			94	1.56667	0.332633	0.469333	0.512	0.437989
																			95	1.58333	0.342417	0.469333	0.512	0.44125
																			96	1.6	0.3522	0.469333	0.512	0.444511
																			97	1.61667	0.361983	0.469333	0.512	0.447772
																			98	1.63333	0.371767	0.469333	0.512	0.451033
																			99	1.65	0.38155	0.469333	0.512	0.454294
																			100	1.66667	0.391333	0.469333	0.512	0.457556
																			101	1.68333	0.401117	0.469333	0.512	0.460817
																			102	1.7	0.4109	0.469333	0.512	0.464078
																			103	1.71667	0.420683	0.469333	0.512	0.467339
																			104	1.73333	0.430467	0.469333	0.512	0.4706
																			105	1.75	0.44025	0.469333	0.512	0.473861
																			106	1.76667	0.44025	0.469333	0.512	0.473861
																			107	1.78333	0.44025	0.469333	0.512	0.473861
																			108	1.8	0.44025	0.469333	0.512	0.473861
																			109	1.81667	0.44025	0.469333	0.512	0.473861
																			110	1.83333	0.44025	0.469333	0.512	0.473861
																			111	1.85	0.44025	0.469333	0.512	0.473861
																			112	1.86667	0.44025	0.469333	0.512	0.473861
																			113	1.88333	0.44025	0.469333	0.512	0.473861
																			114	1.9	0.44025	0.469333	0.512	0.473861
																			115	1.91667	0.44025	0.469333	0.512	0.473861
																			116	1.93333	0.44025	0.469333	0.512	0.473861
																			117	1.95	0.44025	0.469333	0.512	0.473861
																			118	1.96667	0.44025	0.469333	0.512	0.473861
																			119	1.98333	0.44025	0.469333	0.512	0.473861
																			120	2	0.44025	0.469333	0.512	0.473861
																			121	2.01667	0.44025	0.469333	0.512	0.473861
																			122	2.03333	0.44025	0.469333	0.512	0.473861
																			123	2.05	0.44025	0.469333	0.512	0.473861
																			124	2.06667	0.44025	0.469333	0.512	0.473861
																			125	2.08333	0.44025	0.469333	0.512	0.473861
																			126	2.1	0.44025	0.469333	0.512	0.473861
																			127	2.11667	0.44025	0.469333	0.512	0.473861
																			128	2.13333	0.44025	0.469333	0.512	0.473861
																			129	2.15	0.44025	0.469333	0.512	0.473861
																			130	2.16667	0.44025	0.469333	0.512	0.473861
																			131	2.18333	0.44025	0.469333	0.512	0.473861
																			132	2.2	0.44025	0.469333	0.512	0.473861
																			133	2.21667	0.44025	0.469333	0.512	0.473861
																			134	2.23333	0.44025	0.469333	0.512	0.473861
																			135	2.25	0.44025	0.469333	0.512	0.473861
																			136	2.26667	0.44025	0.469333	0.512	0.473861
																			137	2.28333	0.44025	0.469333	0.512	0.473861
																			138	2.3	0.44025	0.469333	0.512	0.473861
																			139	2.31667	0.44025	0.469333	0.512	0.473861
																			140	2.33333	0.44025	0.469333	0.512	0.473861
																			141	2.35	0.44025	0.469333	0.512	0.473861
																			142	2.36667	0.44025	0.469333	0.512	0.473861
																			143	2.38333	0.44025	0.469333	0.512	0.473861
																			144	2.4	0.44025	0.469333	0.512	0.473861
																			145	2.41667	0.44025	0.469333	0.512	0.473861
																			146	2.43333	0.44025	0.469333	0.512	0.473861
																			147	2.45	0.44025	0.469333	0.512	0.473861
																			148	2.46667	0.44025	0.469333	0.512	0.473861
																			149	2.48333	0.44025	0.469333	0.512	0.473861
																			150	2.5	0.44025	0.469333	0.512	0.473861
																			151	2.51667	0.44025	0.469333	0.512	0.473861
																			152	2.53333	0.44025	0.469333	0.512	0.473861
																			153	2.55	0.44025	0.469333	0.512	0.473861
																			154	2.56667	0.44025	0.469333	0.512	0.473861
																			155	2.58333	0.44025	0.469333	0.512	0.473861
																			156	2.6	0.44025	0.469333	0.512	0.473861
																			157	2.61667	0.44025	0.469333	0.512	0.473861
																			158	2.63333	0.44025	0.469333	0.512	0.473861
																			159	2.65	0.44025	0.469333	0.512	0.473861
																			160	2.66667	0.44025	0.469333	0.512	0.473861
																			161	2.68333	0.44025	0.469333	0.512	0.473861
																			162	2.7	0.44025	0.469333	0.512	0.473861
																			163	2.71667	0.44025	0.469333	0.512	0.473861
																			164	2.73333	0.44025	0.469333	0.512	0.473861
																			165	2.75	0.44025	0.469333	0.512	0.473861
																			166	2.76667	0.44025	0.469333	0.512	0.473861
																			167	2.78333	0.44025	0.469333	0.512	0.473861
																			168	2.8	0.44025	0.469333	0.512	0.473861
																			169	2.81667	0.44025	0.469333	0.512	0.473861
																			170	2.83333	0.44025	0.469333	0.512	0.473861
																			171	2.85	0.44025	0.469333	0.512	0.473861
																			172	2.86667	0.44025	0.469333	0.512	0.473861
																			173	2.88333	0.44025	0.469333	0.512	0.473861
																			174	2.9	0.44025	0.469333	0.512	0.473861
																			175	2.91667	0.44025	0.469333	0.512	0.473861
																			176	2.93333	0.44025	0.469333	0.512	0.473861
																			177	2.95	0.44025	0.469333	0.512	0.473861
																			178	2.96667	0.44025	0.469333	0.512	0.473861
																			179	2.98333	0.44025	0.469333	0.512	0.473861
																			180	3	0.44025	0.469333	0.512	0.473861
																			181	3.01667	0.44025	0.469333	0.512	0.473861
																			182	3.03333	0.44025	0.469333	0.512	0.473861
																			183	3.05	0.44025	0.469333	0.512	0.473861
																			184	3.06667	0.44025	0.469333	0.512	0.473861
																			185	3.08333	0.44025	0.469333	0.512	0.473861
																			186	3.1	0.44025	0.469333	0.512	0.473861
																			187	3.11667	0.44025	0.469333	0.512	0.473861
																			188	3.13333	0.44025	0.469333	0.512	0.473861
																			189	3.15	0.44025	0.469333	0.512	0.473861
																			190	3.16667	0.44025	0.469333	0.512	0.473861
																			191	3.18333	0.44025	0.469333	0.512	0.473861
																			192	3.2	0.44025	0.469333	0.512	0.473861
																			193	3.21667	0.44025	0.469333	0.512	0.473861
																			194	3.23333	0.44025	0.469333	0.512	0.473861
																			195	3.25	0.44025	0.469333	0.512	0.473861
																			196	3.26667	0.44025	0.469333	0.512	0.473861
																			197	3.28333	0.44025	0.469333	0.512	0.473861
																			198	3.3	0.44025	0.469333	0.512	0.473861
																			199	3.31667	0.44025	0.469333	0.512	0.473861
																			200	3.33333	0.44025	0.469333	0.512	0.473861
																			201	3.35	0.44025	0.469333	0.512	0.473861
																			202	3.36667	0.44025	0.469333	0.512	0.473861
																			203	3.38333	0.44025	0.469333	0.512	0.473861
																			204	3.4	0.44025	0.469333	0.512	0.473861
																			205	3.41667	0.44025	0.469333	0.512	0.473861
																			206	3.43333	0.44025	0.469333	0.512	0.473861
																			207	3.45	0.44025	0.469333	0.512	0.473861
																			208	3.46667	0.44025	0.469333	0.512	0.473861
																			209	3.48333	0.44025	0.469333	0.512	0.473861
																			210	3.5	0.44025	0.469333	0.512	0.473861
																			211	3.51667	0.44025	0.469333	0.512	0.473861
																			212	3.53333	0.44025	0.469333	0.512	0.473861
																			213	3.55	0.44025	0.469333	0.512	0.473861
																			214	3.56667	0.44025	0.469333	0.512	0.473861
																			215	3.58333	0.44025	0.469333	0.512	0.473861
																			216	3.6	0.44025	0.469333	0.512	0.473861
																			217	3.61667	0.44025	0.469333	0.512	0.473861
																			218	3.63333	0.44025	0.469333	0.512	0.473861
																			219	3.65	0.44025	0.469333	0.512	0.473861
																			220	3.66667	0.44025	0.469333	0.512	0.473861
																			221	3.68333	0.44025	0.469333	0.512	0.473861
																			222	3.7	0.44025	0.469333	0.512	0.473861
																			223	3.71667	0.44025	0.469333	0.512	0.473861
																			224	3.73333	0.44025	0.469333	0.512	0.473861
																			225	3.75	0.44025	0.469333	0.512	0.473861
																			226	3.76667	0.44025	0.469333	0.512	0.473861
																			227	3.78333	0.44025	0.469333	0.512	0.473861
																			228	3.8	0.44025	0.469333	0.512	0.473861
																			229	3.81667	0.44025	0.469333	0.512	0.473861
																			230	3.83333	0.44025	0.469333	0.512	0.473861
																			231	3.85	0.44025	0.469333	0.512	0.473861
																			232	3.86667	0.44025	0.469333	0.512	0.473861
																			233	3.88333	0.44025	0.469333	0.512	0.473861
																			234	3.9	0.44025	0.469333	0.512	0.473861
																			235	3.91667	0.44025	0.469333	0.512	0.473861
																			236	3.93333	0.44025	0.469333	0.512	0.473861
																			237	3.95	0.44025	0.469333	0.512	0.473861
																			238	3.96667	0.44025	0.469333	0.512	0.473861
																			239	3.98333	0.44025	0.469333	0.512	0.473861
																			240	4	0.44025	0.469333	0.512	0.473861
																			241	4.01667	0.44025	0.469333	0.512	0.473861
																			242	4.03333	0.44025	0.469333	0.512	0.473861
																			243	4.05	0.44025	0.469333	0.512	0.473861
																			244	4.06667	0.44025	0.469333	0.512	0.473861
																			245	4.08333	0.44025	0.469333	0.512	0.473861
																			246	4.1	0.44025	0.469333	0.512	0.473861
																			247	4.11667	0.44025	0.469333	0.512	0.473861
																			248	4.13333	0.44025	0.469333	0.512	0.473861
																			249	4.15	0.44025	0.469333	0.512	0.473861
																			250	4.16667	0.44025	0.469333	0.512	0.473861
																			251	4.18333	0.44025	0.469333	0.512	0.473861
																			252	4.2	0.44025	0.469333	0.512	0.473861
																			253	4.21667	0.44025	0.469333	0.512	0.473861
																			254	4.23333	0.44025	0.469333	0.512	0.473861
																			255	4.25	0.44025	0.469333	0.512	0.473861
																			256	4.26667	0.44025	0.469333	0.512	0.473861
																			257	4.28333	0.44025	0.469333	0.512	0.473861
																			258	4.3	0.44025	0.469333	0.512	0.473861
																			259	4.31667	0.44025	0.469333	0.512	0.473861
																			260	4.33333	0.44025	0.469333	0.512	0.473861
																			261	4.35	0.44025	0.469333	0.512	0.473861
																			262	4.36667	0.44025	0.469333	0.512	0.473861
																			263	4.38333	0.44025	0.469333	0.512	0.473861
																			264	4.4	0.44025	0.469333	0.512	0.473861
																			265	4.41667	0.44025	0.469333	0.512	0.473861
																			266	4.43333	0.44025	0.469333	0.512	0.473861
																			267	4.45	0.44025	0.469333	0.512	0.473861
																			268	4.46667	0.44025	0.469333	0.512	0.473861
																			269	4.48333	0.44025	0.469333	0.512	0.473861
																			270	4.5	0.44025	0.469333	0.512	0.473861
																			271	4.51667	0.44025	0.469333	0.512	0.473861
																			272	4.53333	0.44025	0.469333	0.512	0.473861
																			273	4.55	0.44025	0.469333	0.512	0.473861
																			274	4.56667	0.44025	0.469333	0.512	0.473861
																			275	4.58333	0.44025	0.469333	0.512	0.473861
																			276	4.6	0.44025	0.469333	0.512	0.473861
																			277	4.61667	0.44025	0.469333	0.512	0.473861
																			278	4.63333	0.44025	0.469333	0.512	0.473861
																			279	4.65	0.44025	0.469333	0.512	0.473861
																			280	4.66667	0.44025	0.469333	0.512	0.473861
																			281	4.68333	0.44025	0.469333	0.512	0.473861
																			282	4.7	0.44025	0.469333	0.512	0.473861
																			283	4.71667	0.44025	0.469333	0.512	0.473861
																			284	4.73333	0.44025	0.469333	0.512	0.473861
																			285	4.75	0.44025	0.469333	0.512	0.473861
																			286	4.76667	0.44025	0.469333	0.512	0.473861
																			287	4.78333	0.44025	0.469333	0.512	0.473861
																			288	4.8	0.44025	0.469333	0.512	0.473861
																			289	4.81667	0.44025	0.469333	0.512	0.473861
																			290	4.83333	0.44025	0.469333	0.512	0.473861
																			291	4.85	0.44025	0.469333	0.512	0.473861
																			292	4.86667	0.44025	0.469333	0.512	0.473861
																			293	4.88333	0.44025	0.469333	0.512	0.473861
																			294	4.9	0.44025	0.469333	0.512	0.473861
																			295	4.91667	0.44025	0.469333	0.512	0.473861
																			296	4.93333	0.44025	0.469333	0.512	0.473861
																			297	4.95	0.44025	0.469333	0.512	0.473861
																			298	4.96667	0.44025	0.469333	0.512	0.473861
																			299	4.98333	0.44025	0.469333	0.512	0.473861
																			300	5	0.44025	0.469333	0.512	0.473861
																			301	5.01667	0.220125	0.469333	0.256	0.315153
																			302	5.03333	0.110062	0.234667	0.128	0.157576
																			303	5.05	0.0550312	0.117333	0.064	0.0787882
																			304	5.06667	0.0275156	0.0586667	0.032	0.0393941
																			305	5.08333	0.0137578	0.0293333	0.016	0.019697
																			306	5.1	0.00687891	0.0146667	0.008	0.00984852
																			307	5.11667	0.00343945	0.00733333	0.004	0.00492426
																			308	5.13333	0.00171973	0.00366667	0.002	0.00246213
																			309	5.15	0.000859863	0.00183333	0.001	0.00123107
																			310	5.16667	0.000429932	0.000916667	0.0005	0.000615533
																			311	5.18333	0.000214966	0.000458333	0.00025	0.000307766
																			312	5.2	0.000107483	0.000229167	0.000125	0.000153883
																			313	5.21667	5.37415e-05	0.000114583	6.25e-05	7.69416e-05
																			314	5.23333	2.68707e-05	5.72917e-05	3.125e-05	3.84708e-05
																			315	5.25	1.34354e-05	2.86458e-05	1.5625e-05	1.92354e-05
																			316	5.26667	6.71768e-06	1.43229e-05	7.8125e-06	9.6177e-06
																			317	5.28333	3.35884e-06	7.16146e-06	3.90625e-06	4.80885e-06
																			318	5.3	1.67942e-06	3.58073e-06	1.95313e-06	2.40442e-06
																			319	5.31667	8.3971e-07	1.79036e-06	9.76563e-07	1.20221e-06
																			320	5.33333	4.19855e-07	8.95182e-07	4.88281e-07	6.01106e-07
																			321	5.35	2.09928e-07	4.47591e-07	2.44141e-07	3.00553e-07
																			322	5.36667	1.04964e-07	2.23796e-07	1.2207e-07	1.50277e-07
																			323	5.38333	5.24819e-08	1.11898e-07	6.10352e-08	7.51383e-08
																			324	5.4	2.62409e-08	5.59489e-08	3.05176e-08	3.75691e-08
																			325	5.41667	1.31205e-08	2.79744e-08	1.52588e-08	1.87846e-08
																			326	5.43333	6.56024e-09	1.39872e-08	7.62939e-09	9.39228e-09
																			327	5.45	3.28012e-09	6.99361e-09	3.8147e-09	4.69614e-09
																			328	5.46667	1.64006e-09	3.49681e-09	1.90735e-09	2.34807e-09
																			329	5.48333	8.2003e-10	1.7484e-09	9.53674e-10	1.17404e-09
																			330	5.5	4.10015e-10	8.74201e-10	4.76837e-10	5.87018e-10
																			331	5.51667	2.05007e-10	4.37101e-10	2.38419e-10	2.93509e-10
																			332	5.53333	1.02504e-10	2.1855e-10	1.19209e-10	1.46754e-10
																			333	5.55	5.12518e-11	1.09275e-10	5.96046e-11	7.33772e-11
																			334	5.56667	2.56259e-11	5.46376e-11	2.98023e-11	3.66886e-11
																			335	5.58333	1.2813e-11	2.73188e-11	1.49012e-11	1.83443e-11
																			336	5.6	6.40648e-12	1.36594e-11	7.45058e-12	9.17215e-12
																			337	5.61667	3.20324e-12	6.8297e-12	3.72529e-12	4.58608e-12
																			338	5.63333	1.60162e-12	3.41485e-12	1.86265e-12	2.29304e-12
																			339	5.65	8.0081e-13	1.70742e-12	9.31323e-13	1.14652e-12
																			340	5.66667	4.00405e-13	8.53712e-13	4.65661e-13	5.7326e-13
																			341	5.68333	2.00203e-13	4.26856e-13	2.32831e-13	2.8663e-13
																			342	5.7	1.00101e-13	2.13428e-13	1.16415e-13	1.43315e-13
																			343	5.71667	5.00506e-14	1.06714e-13	5.82077e-14	7.16574e-14
																			344	5.73333	2.50253e-14	5.3357e-14	2.91038e-14	3.58287e-14
																			345	5.75	1.25127e-14	2.66785e-14	1.45519e-14	1.79144e-14
																			346	5.76667	6.25633e-15	1.33393e-14	7.27596e-15	8.95718e-15
																			347	5.78333	3.12816e-15	6.66963e-15	3.63798e-15	4.47859e-15
																			348	5.8	1.56408e-15	3.33481e-15	1.81899e-15	2.2393e-15
																			349	5.81667	7.82041e-16	1.66741e-15	9.09495e-16	1.11965e-15
																			350	5.83333	3.91021e-16	8.33703e-16	4.54747e-16	5.59824e-16
																			351	5.85	1.9551e-16	4.16852e-16	2.27374e-16	2.79912e-16
																			352	5.86667	9.77551e-17	2.08426e-16	1.13687e-16	1.39956e-16
																			353	5.88333	4.88776e-17	1.04213e-16	5.68434e-17	6.9978e-17
																			354	5.9	2.44388e-17	5.21065e-17	2.84217e-17	3.4989e-17
																			355	5.91667	1.22194e-17	2.60532e-17	1.42109e-17	1.74945e-17
																			356	5.93333	6.1097e-18	1.30266e-17	7.10543e-18	8.74725e-18
																			357	5.95	3.05485e-18	6.51331e-18	3.55271e-18	4.37362e-18
																			358	5.96667	1.52742e-18	3.25665e-18	1.77636e-18	2.18681e-18
																			359	5.98333	7.63712e-19	1.62833e-18	8.88178e-19	1.09341e-18
																			360	6	3.81856e-19	8.14164e-19	4.44089e-19	5.46703e-19
																			361	6.01667	1.90928e-19	4.07082e-19	2.22045e-19	2.73351e-19
																			362	6.03333	9.5464e-20	2.03541e-19	1.11022e-19	1.36676e-19
																			363	6.05	4.7732e-20	1.0177e-19	5.55112e-20	6.83379e-20
																			364	6.06667	2.3866e-20	5.08852e-20	2.77556e-20	3.41689e-20
																			365	6.08333	1.1933e-20	2.54426e-20	1.38778e-20	1.70845e-20
																			366	6.1	5.9665e-21	1.27213e-20	6.93889e-21	8.54223e-21
																			367	6.11667	2.98325e-21	6.36065e-21	3.46945e-21	4.27112e-21
																			368	6.13333	1.49163e-21	3.18033e-21	1.73472e-21	2.13556e-21
																			369	6.15	7.45813e-22	1.59016e-21	8.67362e-22	1.06778e-21
																			370	6.16667	3.72906e-22	7.95082e-22	4.33681e-22	5.3389e-22
																			371	6.18333	1.86453e-22	3.97541e-22	2.1684e-22	2.66945e-22
																			372	6.2	9.32266e-23	1.9877e-22	1.0842e-22	1.33472e-22
																			373	6.21667	4.66133e-23	9.93852e-23	5.42101e-23	6.67362e-23
																			374	6.23333	2.33066e-23	4.96926e-23	2.71051e-23	3.33681e-23
																			375	6.25	1.16533e-23	2.48463e-23	1.35525e-23	1.6684e-23
																			376	6.26667	5.82666e-24	1.24231e-23	6.77626e-24	8.34202e-24
																			377	6.28333	2.91333e-24	6.21157e-24	3.38813e-24	4.17101e-24
																			378	6.3	1.45667e-24	3.10579e-24	1.69407e-24	2.08551e-24
																			379	6.31667	7.28333e-25	1.55289e-24	8.47033e-25	1.04275e-24
																			380	6.33333	3.64166e-25	7.76447e-25	4.23516e-25	5.21377e-25
																			381	6.35	1.82083e-25	3.88223e-25	2.11758e-25	2.60688e-25
																			382	6.36667	9.10416e-26	1.94112e-25	1.05879e-25	1.30344e-25
																			383	6.38333	4.55208e-26	9.70559e-26	5.29396e-26	6.51721e-26
																			384	6.4	2.27604e-26	4.85279e-26	2.64698e-26	3.2586e-26
																			385	6.41667	1.13802e-26	2.4264e-26	1.32349e-26	1.6293e-26
																			386	6.43333	5.6901e-27	1.2132e-26	6.61744e-27	8.14651e-27
																			387	6.45	2.84505e-27	6.06599e-27	3.30872e-27	4.07325e-27
																			388	6.46667	1.42252e-27	3.033e-27	1.65436e-27	2.03663e-27
																			389	6.48333	7.11262e-28	1.5165e-27	8.27181e-28	1.01831e-27
																			390	6.5	3.55631e-28	7.58249e-28	4.1359e-28	5.09157e-28
																			391	6.51667	1.77816e-28	3.79124e-28	2.06795e-28	2.54578e-28
																			392	6.53333	8.89078e-29	1.89562e-28	1.03398e-28	1.27289e-28
																			393	6.55	4.44539e-29	9.47811e-29	5.16988e-29	6.36446e-29
																			394	6.56667	2.22269e-29	4.73906e-29	2.58494e-29	3.18223e-29
																			395	6.58333	1.11135e-29	2.36953e-29	1.29247e-29	1.59111e-29
																			396	6.6	5.55674e-30	1.18476e-29	6.46235e-30	7.95557e-30
																			397	6.61667	2.77837e-30	5.92382e-30	3.23117e-30	3.97779e-30
																			398	6.63333	1.38918e-30	2.96191e-30	1.61559e-30	1.98889e-30
																			399	6.65	6.94592e-31	1.48095e-30	8.07794e-31	9.94447e-31
																			400	6.66667	3.47296e-31	7.40477e-31	4.03897e-31	4.97223e-31
																			401	6.68333	1.73648e-31	3.70239e-31	2.01948e-31	2.48612e-31
																			402	6.7	8.6824e-32	1.85119e-31	1.00974e-31	1.24306e-31
																			403	6.71667	4.3412e-32	9.25597e-32	5.04871e-32	6.21529e-32
																			404	6.73333	2.1706e-32	4.62798e-32	2.52435e-32	3.10765e-32
																			405	6.75	1.0853e-32	2.31399e-32	1.26218e-32	1.55382e-32
																			406	6.76667	5.4265e-33	1.157e-32	6.31089e-33	7.76912e-33
																			407	6.78333	2.71325e-33	5.78498e-33	3.15544e-33	3.88456e-33
																			408	6.8	1.35663e-33	2.89249e-33	1.57772e-33	1.94228e-33
																			409	6.81667	6.78313e-34	1.44624e-33	7.88861e-34	9.71139e-34
																			410	6.83333	3.39156e-34	7.23122e-34	3.9443e-34	4.8557e-34
																			411	6.85	1.69578e-34	3.61561e-34	1.97215e-34	2.42785e-34
																			412	6.86667	8.47891e-35	1.80781e-34	9.86076e-35	1.21392e-34
																			413	6.88333	4.23945e-35	9.03903e-35	4.93038e-35	6.06962e-35
																			414	6.9	2.11973e-35	4.51952e-35	2.46519e-35	3.03481e-35
																			415	6.91667	1.05986e-35	2.25976e-35	1.2326e-35	1.51741e-35
																			416	6.93333	5.29932e-36	1.12988e-35	6.16298e-36	7.58703e-36
																			417	6.95	2.64966e-36	5.64939e-36	3.08149e-36	3.79351e-36
																			418	6.96667	1.32483e-36	2.8247e-36	1.54074e-36	1.89676e-36
																			419	6.98333	6.62415e-37	1.41235e-36	7.70372e-37	9.48378e-37
																			420	7	3.31207e-37	7.06174e-37	3.85186e-37	4.74189e-37
																			421	7.01667	1.65604e-37	3.53087e-37	1.92593e-37	2.37095e-37
																			422	7.03333	8.28018e-38	1.76544e-37	9.62965e-38	1.18547e-37
																			423	7.05	4.14009e-38	8.82718e-38	4.81482e-38	5.92736e-38
																			424	7.06667	2.07005e-38	4.41359e-38	2.40741e-38	2.96368e-38
																			425	7.08333	1.03502e-38	2.20679e-38	1.20371e-38	1.48184e-38

## Sheet: Fig. 6B
	Insulin Secretion at diferent H2S (uM)
		H2S	0.61	1.07		Corrected	0.38	1.61 uM					Time	Time, hours	ng/ml	dissolved, uM		Time	ng/ml	dissolved, uM		Time	ng/ml	dissolved, uM		Time	ng/ml	dissolved, uM
	Time, hours	Adjusted Time, hrs	9/3/2020, CH3	9/3/2020, CH4	Time, hours	Time, hrs	9/29/20, Ch4	9/3/2020, CH2					0	0	0	0		0	0	0		0	0	0		0	0	0
	-0.25	-3.25	0.0441807	0.0275429	-0.25	-1.25	0.0211158	0.04472					1	0.0166667	170.515	9.46359		1	97.8333	5.42975		1	170.515	9.46359		1	170.515	9.46359
	-0.166667	-3.16667	0.0461589	0.0285093	-0.166667	-1.16667	0.0231162	0.0379557					2	0.0333333	341.03	18.9272		2	195.667	10.8595		2	341.03	18.9272		2	341.03	18.9272
	-0.0833333	-3.08333	0.0369271	0.0306837	-0.0833333	-1.08333	0.0175595	0.0402104					3	0.05	511.545	28.3908		3	293.5	16.2892		3	511.545	28.3908		3	511.545	28.3908
	0	-3	0.0375865	0.0256101	0	-1	0.036008	0.0417136					4	0.0666667	682.061	37.8544		4	391.333	21.719		4	682.061	37.8544		4	682.061	37.8544
	0.166667	-2.83333	0.179855	0.247644	0.166667	-0.833333	0.231162	0.211011					5	0.0833333	852.576	47.318		5	489.167	27.1487		5	852.576	47.318		5	852.576	47.318
	0.333333	-2.66667	0.357072	0.353225	0.333333	-0.666667	0.524116	0.408493					6	0.1	1023.09	56.7815		6	587	32.5785		6	1023.09	56.7815		6	1023.09	56.7815
	0.5	-2.5	0.772667	0.797294	0.5	-0.5	0.725717	0.934423					7	0.116667	1193.61	66.2451		7	684.833	38.0082		7	1193.61	66.2451		7	1193.61	66.2451
	0.666667	-2.33333	0.955819	0.844648	0.666667	-0.333333	0.99022	0.993611					8	0.133333	1364.12	75.7087		8	782.667	43.438		8	1364.12	75.7087		8	1364.12	75.7087
	0.833333	-2.16667	0.96637	0.958202	0.833333	-0.166667	0.967993	0.999812					9	0.15	1534.64	85.1723		9	880.5	48.8678		9	1534.64	85.1723		9	1534.64	85.1723
	1	-2	1.00198	0.965934	1	0	1.04179	1.00658					10	0.166667	1705.15	94.6359		10	978.333	54.2975		10	1705.15	94.6359		10	1705.15	94.6359
	1.5	-1.5	1.00198	0.97584	1.16667	0.166667	1.00778	1.01804					11	0.183333	1875.67	104.099		11	1076.17	59.7272		11	1875.67	104.099		11	1875.67	104.099
	2	-1	1.03363	0.968833	1.33333	0.333333	1.01045	1.00883					12	0.2	2046.18	113.563		12	1174	65.157		12	2046.18	113.563		12	2046.18	113.563
	2.5	-0.5	0.933399	1.01522	1.5	0.5	1.08046	0.966366					13	0.216667	2216.7	123.027		13	1271.83	70.5867		13	2216.7	123.027		13	2216.7	123.027
	3	0	1.03099	1.04011	1.66667	0.666667	1.06935	0.891206					14	0.233333	2387.21	132.49		14	1369.67	76.0165		14	2387.21	132.49		14	2387.21	132.49
	3.16667	0.166667	1.04946	1.03407	1.83333	0.833333	1.11358	1.03551					15	0.25	2557.73	141.954		15	1467.5	81.4462		15	2557.73	141.954		15	2557.73	141.954
	3.33333	0.333333	0.984174	1.04397	2	1	1.26828	1.12044					16	0.266667	2728.24	151.417		16	1565.33	86.876		16	2728.24	151.417		16	2728.24	151.417
	3.5	0.5	1.00857	1.01643	2.16667	1.16667	1.28317	1.21909					17	0.283333	2898.76	160.881		17	1663.17	92.3057		17	2898.76	160.881		17	2898.76	160.881
	3.66667	0.666667	1.01055	1.00145	2.33333	1.33333	1.28117	1.28974					18	0.3	3069.27	170.345		18	1761	97.7355		18	3069.27	170.345		18	3069.27	170.345
	3.83333	0.833333	1.0455	1.06475	2.5	1.5	1.30051	1.15915					19	0.316667	3239.79	179.808		19	1858.83	103.165		19	3239.79	179.808		19	3239.79	179.808
	4	1	1.00198	1.19497	2.66667	1.66667	1.3623	1.04679					20	0.333333	3410.3	189.272		20	1956.67	108.595		20	3410.3	189.272		20	3410.3	189.272
	4.16667	1.16667	1.10468	1.31916	2.83333	1.83333	1.32629	0.86227					21	0.35	3580.82	198.735		21	2054.5	114.025		21	3580.82	198.735		21	3580.82	198.735
	4.33333	1.33333	1.28058	1.4071	3	2	1.3134	0.746148					22	0.366667	3751.33	208.199		22	2152.33	119.454		22	3751.33	208.199		22	3580.82	198.735
	4.5	1.5	1.33993	1.37545	3.33333	2.33333	1.36497	0.642991					23	0.383333	3921.85	217.663		23	2250.17	124.884		23	3921.85	217.663		23	3580.82	198.735
	4.66667	1.66667	1.2608	1.32713	3.66667	2.66667	1.39275	0.635287					24	0.4	4092.36	227.126		24	2348	130.314		24	4092.36	227.126		24	3580.82	198.735
	4.83333	1.83333	1.18183	0.98188	4	3	1.34852	0.627772					25	0.416667	4262.88	236.59		25	2445.83	135.744		25	4262.88	236.59		25	3580.82	198.735
	5	2	1.1238	0.808166	4.33333	3.33333	1.3283	0.658963					26	0.433333	4433.39	246.053		26	2543.67	141.173		26	4433.39	246.053		26	3580.82	198.735
	5.16667	2.16667	1.1304	0.830877	4.66667	3.66667	1.36052	0.649004					27	0.45	4603.91	255.517		27	2641.5	146.603		27	4603.91	255.517		27	3580.82	198.735
	5.33333	2.33333	1.08226	0.834743	5	4	1.26828	0.617249					28	0.466667	4774.42	264.981		28	2739.33	152.033		28	4774.42	264.981		28	3580.82	198.735
	5.5	2.5	1.07765	0.83	5.08333	4.08333	1.06668	0.654265					29	0.483333	4944.94	274.444		29	2837.17	157.463		29	4944.94	274.444		29	3580.82	198.735
	5.66667	2.66667	1.10468	0.833776	5.58333	4.58333	1.09802	0.713641					30	0.5	5115.45	283.908		30	2935	162.892		30	5115.45	283.908		30	3580.82	198.735
	5.83333	2.83333	1.09281	0.794395	6.08333	5.08333	0.95599	0.804585					31	0.516667	5285.97	293.371		31	3032.83	168.322		31	5285.97	293.371		31	3580.82	198.735
	6	3	1.11523	0.815898	6.58333	5.58333	0.844632	0.822811					32	0.533333	5456.48	302.835		32	3130.67	173.752		32	5456.48	302.835		32	3580.82	198.735
													33	0.55	5627	312.298		33	3228.5	179.182		33	5627	312.298		33	3580.82	198.735
													34	0.566667	5797.52	321.762		34	3326.33	184.611		34	5797.52	321.762		34	3580.82	198.735
													35	0.583333	5968.03	331.226		35	3424.17	190.041		35	5968.03	331.226		35	3580.82	198.735
													36	0.6	6138.55	340.689		36	3522	195.471		36	6138.55	340.689		36	3580.82	198.735
													37	0.616667	6309.06	350.153		37	3619.83	200.901		37	6309.06	350.153		37	3580.82	198.735
													38	0.633333	6479.58	359.616		38	3717.67	206.33		38	6479.58	359.616		38	3580.82	198.735
													39	0.65	6650.09	369.08		39	3815.5	211.76		39	6650.09	369.08		39	3580.82	198.735
													40	0.666667	6820.61	378.544		40	3913.33	217.19		40	6820.61	378.544		40	3580.82	198.735
													41	0.683333	6991.12	388.007		41	4011.17	222.62		41	6991.12	388.007		41	3580.82	198.735
													42	0.7	7161.64	397.471		42	4109	228.049		42	7161.64	397.471		42	3580.82	198.735
													43	0.716667	7332.15	406.934		43	4206.83	233.479		43	7332.15	406.934		43	3580.82	198.735
													44	0.733333	7502.67	416.398		44	4304.67	238.909		44	7502.67	416.398		44	3580.82	198.735
													45	0.75	7673.18	425.862		45	4402.5	244.339		45	7673.18	425.862		45	3580.82	198.735
													46	0.766667	7843.7	435.325		46	4500.33	249.768		46	7843.7	435.325		46	3580.82	198.735
													47	0.783333	8014.21	444.789		47	4598.17	255.198		47	8014.21	444.789		47	3580.82	198.735
													48	0.8	8184.73	454.252		48	4696	260.628		48	8184.73	454.252		48	3580.82	198.735
													49	0.816667	8355.24	463.716		49	4793.83	266.058		49	8355.24	463.716		49	3580.82	198.735
													50	0.833333	8525.76	473.18		50	4891.67	271.487		50	8525.76	473.18		50	3580.82	198.735
													51	0.85	8696.27	482.643		51	4989.5	276.917		51	8696.27	482.643		51	3580.82	198.735
													52	0.866667	8866.79	492.107		52	5087.33	282.347		52	8866.79	492.107		52	3580.82	198.735
													53	0.883333	9037.3	501.57		53	5185.17	287.777		53	9037.3	501.57		53	3580.82	198.735
													54	0.9	9207.82	511.034		54	5283	293.207		54	9207.82	511.034		54	3580.82	198.735
													55	0.916667	9378.33	520.497		55	5380.83	298.636		55	9378.33	520.497		55	3580.82	198.735
													56	0.933333	9548.85	529.961		56	5478.67	304.066		56	9548.85	529.961		56	3580.82	198.735
													57	0.95	9719.36	539.425		57	5576.5	309.496		57	9719.36	539.425		57	3580.82	198.735
													58	0.966667	9889.88	548.888		58	5674.33	314.925		58	9889.88	548.888		58	3580.82	198.735
													59	0.983333	10060.4	558.352		59	5772.17	320.355		59	10060.4	558.352		59	3580.82	198.735
													60	1	10230.9	567.815		60	5870	325.785		60	10230.9	567.815		60	3580.82	198.735
													61	1.01667	10401.4	577.279		61	5870	325.785		61	10230.9	567.815		61	3580.82	198.735
													62	1.03333	10571.9	586.743		62	5870	325.785		62	10230.9	567.815		62	3580.82	198.735
													63	1.05	10742.5	596.206		63	5870	325.785		63	10230.9	567.815		63	3580.82	198.735
													64	1.06667	10913	605.67		64	5870	325.785		64	10230.9	567.815		64	3580.82	198.735
													65	1.08333	11083.5	615.133		65	5870	325.785		65	10230.9	567.815		65	3580.82	198.735
													66	1.1	11254	624.597		66	5870	325.785		66	10230.9	567.815		66	3580.82	198.735
													67	1.11667	11424.5	634.061		67	5870	325.785		67	10230.9	567.815		67	3580.82	198.735
													68	1.13333	11595	643.524		68	5870	325.785		68	10230.9	567.815		68	3580.82	198.735
													69	1.15	11765.5	652.988		69	5870	325.785		69	10230.9	567.815		69	3580.82	198.735
													70	1.16667	11936.1	662.451		70	5870	325.785		70	10230.9	567.815		70	3580.82	198.735
													71	1.18333	12106.6	671.915		71	5870	325.785		71	10230.9	567.815		71	3580.82	198.735
													72	1.2	12277.1	681.379		72	5870	325.785		72	10230.9	567.815		72	3580.82	198.735
													73	1.21667	12447.6	690.842		73	5870	325.785		73	10230.9	567.815		73	3580.82	198.735
													74	1.23333	12618.1	700.306		74	5870	325.785		74	10230.9	567.815		74	3580.82	198.735
													75	1.25	12788.6	709.769		75	5870	325.785		75	10230.9	567.815		75	3580.82	198.735
													76	1.26667	12959.2	719.233		76	5870	325.785		76	10230.9	567.815		76	3580.82	198.735	plat =
													77	1.28333	13129.7	728.697		77	5870	325.785		77	10230.9	567.815		77	3580.82	198.735
													78	1.3	13300.2	738.16		78	5870	325.785		78	10230.9	567.815		78	3580.82	198.735
													79	1.31667	13470.7	747.624		79	5870	325.785		79	10230.9	567.815		79	3580.82	198.735
													80	1.33333	13641.2	757.087		80	5870	325.785		80	10230.9	567.815		80	3580.82	198.735
													81	1.35	13811.7	766.551		81	5870	325.785		81	10230.9	567.815		81	3580.82	198.735
													82	1.36667	13982.2	776.014		82	5870	325.785		82	10230.9	567.815		82	3580.82	198.735
													83	1.38333	14152.8	785.478		83	5870	325.785		83	10230.9	567.815		83	3580.82	198.735
													84	1.4	14323.3	794.942		84	5870	325.785		84	10230.9	567.815		84	3580.82	198.735
													85	1.41667	14493.8	804.405		85	5870	325.785		85	10230.9	567.815		85	3580.82	198.735
													86	1.43333	14664.3	813.869		86	5870	325.785		86	10230.9	567.815		86	3580.82	198.735
													87	1.45	14834.8	823.332		87	5870	325.785		87	10230.9	567.815		87	3580.82	198.735
													88	1.46667	15005.3	832.796		88	5870	325.785		88	10230.9	567.815		88	3580.82	198.735
													89	1.48333	15175.8	842.26		89	5870	325.785		89	10230.9	567.815		89	3580.82	198.735
													90	1.5	15346.4	851.723		90	5870	325.785		90	10230.9	567.815		90	3580.82	198.735
													91	1.51667	15346.4	851.723		91	5870	325.785		91	10230.9	567.815		91	3580.82	198.735
													92	1.53333	15346.4	851.723		92	5870	325.785		92	10230.9	567.815		92	3580.82	198.735
													93	1.55	15346.4	851.723		93	5870	325.785		93	10230.9	567.815		93	3580.82	198.735
													94	1.56667	15346.4	851.723		94	5870	325.785		94	10230.9	567.815		94	3580.82	198.735
													95	1.58333	15346.4	851.723		95	5870	325.785		95	10230.9	567.815		95	3580.82	198.735
													96	1.6	15346.4	851.723		96	5870	325.785		96	10230.9	567.815		96	3580.82	198.735
													97	1.61667	15346.4	851.723		97	5870	325.785		97	10230.9	567.815		97	3580.82	198.735
													98	1.63333	15346.4	851.723		98	5870	325.785		98	10230.9	567.815		98	3580.82	198.735
													99	1.65	15346.4	851.723		99	5870	325.785		99	10230.9	567.815		99	3580.82	198.735
													100	1.66667	15346.4	851.723		100	5870	325.785		100	10230.9	567.815		100	3580.82	198.735
													101	1.68333	15346.4	851.723		101	5870	325.785		101	10230.9	567.815		101	3580.82	198.735
													102	1.7	15346.4	851.723		102	5870	325.785		102	10230.9	567.815		102	3580.82	198.735
													103	1.71667	15346.4	851.723		103	5870	325.785		103	10230.9	567.815		103	3580.82	198.735
													104	1.73333	15346.4	851.723		104	5870	325.785		104	10230.9	567.815		104	3580.82	198.735
													105	1.75	15346.4	851.723		105	5870	325.785		105	10230.9	567.815		105	3580.82	198.735
													106	1.76667	15346.4	851.723		106	5870	325.785		106	10230.9	567.815		106	3580.82	198.735
													107	1.78333	15346.4	851.723		107	5870	325.785		107	10230.9	567.815		107	3580.82	198.735
													108	1.8	15346.4	851.723		108	5870	325.785		108	10230.9	567.815		108	3580.82	198.735
													109	1.81667	15346.4	851.723		109	5870	325.785		109	10230.9	567.815		109	3580.82	198.735
													110	1.83333	15346.4	851.723		110	5870	325.785		110	10230.9	567.815		110	3580.82	198.735
													111	1.85	15346.4	851.723		111	5870	325.785		111	10230.9	567.815		111	3580.82	198.735
													112	1.86667	15346.4	851.723		112	5870	325.785		112	10230.9	567.815		112	3580.82	198.735
													113	1.88333	15346.4	851.723		113	5870	325.785		113	10230.9	567.815		113	3580.82	198.735
													114	1.9	15346.4	851.723		114	5870	325.785		114	10230.9	567.815		114	3580.82	198.735
													115	1.91667	15346.4	851.723		115	5870	325.785		115	10230.9	567.815		115	3580.82	198.735
													116	1.93333	15346.4	851.723		116	5870	325.785		116	10230.9	567.815		116	3580.82	198.735
													117	1.95	15346.4	851.723		117	5870	325.785		117	10230.9	567.815		117	3580.82	198.735
													118	1.96667	15346.4	851.723		118	5870	325.785		118	10230.9	567.815		118	3580.82	198.735
													119	1.98333	15346.4	851.723		119	5870	325.785		119	10230.9	567.815		119	3580.82	198.735
													120	2	15346.4	851.723		120	5870	325.785		120	10230.9	567.815		120	3580.82	198.735
													121	2.01667	15346.4	851.723		121	5870	325.785		121	10230.9	567.815		121	3580.82	198.735
													122	2.03333	15346.4	851.723		122	5870	325.785		122	10230.9	567.815		122	3580.82	198.735
													123	2.05	15346.4	851.723		123	5870	325.785		123	10230.9	567.815		123	3580.82	198.735
													124	2.06667	15346.4	851.723		124	5870	325.785		124	10230.9	567.815		124	3580.82	198.735
													125	2.08333	15346.4	851.723		125	5870	325.785		125	10230.9	567.815		125	3580.82	198.735
													126	2.1	15346.4	851.723		126	5870	325.785		126	10230.9	567.815		126	3580.82	198.735
													127	2.11667	15346.4	851.723		127	5870	325.785		127	10230.9	567.815		127	3580.82	198.735
													128	2.13333	15346.4	851.723		128	5870	325.785		128	10230.9	567.815		128	3580.82	198.735
													129	2.15	15346.4	851.723		129	5870	325.785		129	10230.9	567.815		129	3580.82	198.735
													130	2.16667	15346.4	851.723		130	5870	325.785		130	10230.9	567.815		130	3580.82	198.735
													131	2.18333	15346.4	851.723		131	5870	325.785		131	10230.9	567.815		131	3580.82	198.735
													132	2.2	15346.4	851.723		132	5870	325.785		132	10230.9	567.815		132	3580.82	198.735
													133	2.21667	15346.4	851.723		133	5870	325.785		133	10230.9	567.815		133	3580.82	198.735
													134	2.23333	15346.4	851.723		134	5870	325.785		134	10230.9	567.815		134	3580.82	198.735
													135	2.25	15346.4	851.723		135	5870	325.785		135	10230.9	567.815		135	3580.82	198.735
													136	2.26667	15346.4	851.723		136	5870	325.785		136	10230.9	567.815		136	3580.82	198.735
													137	2.28333	15346.4	851.723		137	5870	325.785		137	10230.9	567.815		137	3580.82	198.735
													138	2.3	15346.4	851.723		138	5870	325.785		138	10230.9	567.815		138	3580.82	198.735
													139	2.31667	15346.4	851.723		139	5870	325.785		139	10230.9	567.815		139	3580.82	198.735
													140	2.33333	15346.4	851.723		140	5870	325.785		140	10230.9	567.815		140	3580.82	198.735
													141	2.35	15346.4	851.723		141	5870	325.785		141	10230.9	567.815		141	3580.82	198.735
													142	2.36667	15346.4	851.723		142	5870	325.785		142	10230.9	567.815		142	3580.82	198.735
													143	2.38333	15346.4	851.723		143	5870	325.785		143	10230.9	567.815		143	3580.82	198.735
													144	2.4	15346.4	851.723		144	5870	325.785		144	10230.9	567.815		144	3580.82	198.735
													145	2.41667	15346.4	851.723		145	5870	325.785		145	10230.9	567.815		145	3580.82	198.735
													146	2.43333	15346.4	851.723		146	5870	325.785		146	10230.9	567.815		146	3580.82	198.735
													147	2.45	15346.4	851.723		147	5870	325.785		147	10230.9	567.815		147	3580.82	198.735
													148	2.46667	15346.4	851.723		148	5870	325.785		148	10230.9	567.815		148	3580.82	198.735
													149	2.48333	15346.4	851.723		149	5870	325.785		149	10230.9	567.815		149	3580.82	198.735
													150	2.5	15346.4	851.723		150	5870	325.785		150	10230.9	567.815		150	3580.82	198.735
													151	2.51667	15346.4	851.723		151	5870	325.785		151	10230.9	567.815		151	3580.82	198.735
													152	2.53333	15346.4	851.723		152	5870	325.785		152	10230.9	567.815		152	3580.82	198.735
													153	2.55	15346.4	851.723		153	5870	325.785		153	10230.9	567.815		153	3580.82	198.735
													154	2.56667	15346.4	851.723		154	5870	325.785		154	10230.9	567.815		154	3580.82	198.735
													155	2.58333	15346.4	851.723		155	5870	325.785		155	10230.9	567.815		155	3580.82	198.735
													156	2.6	15346.4	851.723		156	5870	325.785		156	10230.9	567.815		156	3580.82	198.735
													157	2.61667	15346.4	851.723		157	5870	325.785		157	10230.9	567.815		157	3580.82	198.735
													158	2.63333	15346.4	851.723		158	5870	325.785		158	10230.9	567.815		158	3580.82	198.735
													159	2.65	15346.4	851.723		159	5870	325.785		159	10230.9	567.815		159	3580.82	198.735
													160	2.66667	15346.4	851.723		160	5870	325.785		160	10230.9	567.815		160	3580.82	198.735
													161	2.68333	15346.4	851.723		161	5870	325.785		161	10230.9	567.815		161	3580.82	198.735
													162	2.7	15346.4	851.723		162	5870	325.785		162	10230.9	567.815		162	3580.82	198.735
													163	2.71667	15346.4	851.723		163	5870	325.785		163	10230.9	567.815		163	3580.82	198.735
													164	2.73333	15346.4	851.723		164	5870	325.785		164	10230.9	567.815		164	3580.82	198.735
													165	2.75	15346.4	851.723		165	5870	325.785		165	10230.9	567.815		165	3580.82	198.735
													166	2.76667	15346.4	851.723		166	5870	325.785		166	10230.9	567.815		166	3580.82	198.735
													167	2.78333	15346.4	851.723		167	5870	325.785		167	10230.9	567.815		167	3580.82	198.735
													168	2.8	15346.4	851.723		168	5870	325.785		168	10230.9	567.815		168	3580.82	198.735
													169	2.81667	15346.4	851.723		169	5870	325.785		169	10230.9	567.815		169	3580.82	198.735
													170	2.83333	15346.4	851.723		170	5870	325.785		170	10230.9	567.815		170	3580.82	198.735
													171	2.85	15346.4	851.723		171	5870	325.785		171	10230.9	567.815		171	3580.82	198.735
													172	2.86667	15346.4	851.723		172	5870	325.785		172	10230.9	567.815		172	3580.82	198.735
													173	2.88333	15346.4	851.723		173	5870	325.785		173	10230.9	567.815		173	3580.82	198.735
													174	2.9	15346.4	851.723		174	5870	325.785		174	10230.9	567.815		174	3580.82	198.735
													175	2.91667	15346.4	851.723		175	5870	325.785		175	10230.9	567.815		175	3580.82	198.735
													176	2.93333	15346.4	851.723		176	5870	325.785		176	10230.9	567.815		176	3580.82	198.735
													177	2.95	15346.4	851.723		177	5870	325.785		177	10230.9	567.815		177	3580.82	198.735
													178	2.96667	15346.4	851.723		178	5870	325.785		178	10230.9	567.815		178	3580.82	198.735
													179	2.98333	15346.4	851.723		179	5870	325.785		179	10230.9	567.815		179	3580.82	198.735
													180	3	15346.4	851.723		180	5870	325.785		180	10230.9	567.815		180	3580.82	198.735
													181	3.01667	15346.4	851.723		181	5870	325.785		181	10230.9	567.815		181	3580.82	198.735
													182	3.03333	15346.4	851.723		182	5870	325.785		182	10230.9	567.815		182	3580.82	198.735
													183	3.05	15346.4	851.723		183	5870	325.785		183	10230.9	567.815		183	3580.82	198.735
													184	3.06667	15346.4	851.723		184	5870	325.785		184	10230.9	567.815		184	3580.82	198.735
													185	3.08333	15346.4	851.723		185	5870	325.785		185	10230.9	567.815		185	3580.82	198.735
													186	3.1	15346.4	851.723		186	5870	325.785		186	10230.9	567.815		186	3580.82	198.735
													187	3.11667	15346.4	851.723		187	5870	325.785		187	10230.9	567.815		187	3580.82	198.735
													188	3.13333	15346.4	851.723		188	5870	325.785		188	10230.9	567.815		188	3580.82	198.735
													189	3.15	15346.4	851.723		189	5870	325.785		189	10230.9	567.815		189	3580.82	198.735
													190	3.16667	15346.4	851.723		190	5870	325.785		190	10230.9	567.815		190	3580.82	198.735
													191	3.18333	15346.4	851.723		191	5870	325.785		191	10230.9	567.815		191	3580.82	198.735
													192	3.2	15346.4	851.723		192	5870	325.785		192	10230.9	567.815		192	3580.82	198.735
													193	3.21667	15346.4	851.723		193	5870	325.785		193	10230.9	567.815		193	3580.82	198.735
													194	3.23333	15346.4	851.723		194	5870	325.785		194	10230.9	567.815		194	3580.82	198.735
													195	3.25	15346.4	851.723		195	5870	325.785		195	10230.9	567.815		195	3580.82	198.735
													196	3.26667	15346.4	851.723		196	5870	325.785		196	10230.9	567.815		196	3580.82	198.735
													197	3.28333	15346.4	851.723		197	5870	325.785		197	10230.9	567.815		197	3580.82	198.735
													198	3.3	15346.4	851.723		198	5870	325.785		198	10230.9	567.815		198	3580.82	198.735
													199	3.31667	15346.4	851.723		199	5870	325.785		199	10230.9	567.815		199	3580.82	198.735
													200	3.33333	15346.4	851.723		200	5870	325.785		200	10230.9	567.815		200	3580.82	198.735
													201	3.35	15346.4	851.723		201	5870	325.785		201	10230.9	567.815		201	3580.82	198.735
													202	3.36667	15346.4	851.723		202	5870	325.785		202	10230.9	567.815		202	3580.82	198.735
													203	3.38333	15346.4	851.723		203	5870	325.785		203	10230.9	567.815		203	3580.82	198.735
													204	3.4	15346.4	851.723		204	5870	325.785		204	10230.9	567.815		204	3580.82	198.735
													205	3.41667	15346.4	851.723		205	5870	325.785		205	10230.9	567.815		205	3580.82	198.735
													206	3.43333	15346.4	851.723		206	5870	325.785		206	10230.9	567.815		206	3580.82	198.735
													207	3.45	15346.4	851.723		207	5870	325.785		207	10230.9	567.815		207	3580.82	198.735
													208	3.46667	15346.4	851.723		208	5870	325.785		208	10230.9	567.815		208	3580.82	198.735
													209	3.48333	15346.4	851.723		209	5870	325.785		209	10230.9	567.815		209	3580.82	198.735
													210	3.5	15346.4	851.723		210	5870	325.785		210	10230.9	567.815		210	3580.82	198.735
													211	3.51667	15346.4	851.723		211	5870	325.785		211	10230.9	567.815		211	3580.82	198.735
													212	3.53333	15346.4	851.723		212	5870	325.785		212	10230.9	567.815		212	3580.82	198.735
													213	3.55	15346.4	851.723		213	5870	325.785		213	10230.9	567.815		213	3580.82	198.735
													214	3.56667	15346.4	851.723		214	5870	325.785		214	10230.9	567.815		214	3580.82	198.735
													215	3.58333	15346.4	851.723		215	5870	325.785		215	10230.9	567.815		215	3580.82	198.735
													216	3.6	15346.4	851.723		216	5870	325.785		216	10230.9	567.815		216	3580.82	198.735
													217	3.61667	15346.4	851.723		217	5870	325.785		217	10230.9	567.815		217	3580.82	198.735
													218	3.63333	15346.4	851.723		218	5870	325.785		218	10230.9	567.815		218	3580.82	198.735
													219	3.65	15346.4	851.723		219	5870	325.785		219	10230.9	567.815		219	3580.82	198.735
													220	3.66667	15346.4	851.723		220	5870	325.785		220	10230.9	567.815		220	3580.82	198.735
													221	3.68333	15346.4	851.723		221	5870	325.785		221	10230.9	567.815		221	3580.82	198.735
													222	3.7	15346.4	851.723		222	5870	325.785		222	10230.9	567.815		222	3580.82	198.735
													223	3.71667	15346.4	851.723		223	5870	325.785		223	10230.9	567.815		223	3580.82	198.735
													224	3.73333	15346.4	851.723		224	5870	325.785		224	10230.9	567.815		224	3580.82	198.735
													225	3.75	15346.4	851.723		225	5870	325.785		225	10230.9	567.815		225	3580.82	198.735
													226	3.76667	15346.4	851.723		226	5870	325.785		226	10230.9	567.815		226	3580.82	198.735
													227	3.78333	15346.4	851.723		227	5870	325.785		227	10230.9	567.815		227	3580.82	198.735
													228	3.8	15346.4	851.723		228	5870	325.785		228	10230.9	567.815		228	3580.82	198.735
													229	3.81667	15346.4	851.723		229	5870	325.785		229	10230.9	567.815		229	3580.82	198.735
													230	3.83333	15346.4	851.723		230	5870	325.785		230	10230.9	567.815		230	3580.82	198.735
													231	3.85	15346.4	851.723		231	5870	325.785		231	10230.9	567.815		231	3580.82	198.735
													232	3.86667	15346.4	851.723		232	5870	325.785		232	10230.9	567.815		232	3580.82	198.735
													233	3.88333	15346.4	851.723		233	5870	325.785		233	10230.9	567.815		233	3580.82	198.735
													234	3.9	15346.4	851.723		234	5870	325.785		234	10230.9	567.815		234	3580.82	198.735
													235	3.91667	15346.4	851.723		235	5870	325.785		235	10230.9	567.815		235	3580.82	198.735
													236	3.93333	15346.4	851.723		236	5870	325.785		236	10230.9	567.815		236	3580.82	198.735
													237	3.95	15346.4	851.723		237	5870	325.785		237	10230.9	567.815		237	3580.82	198.735
													238	3.96667	15346.4	851.723		238	5870	325.785		238	10230.9	567.815		238	3580.82	198.735
													239	3.98333	15346.4	851.723		239	5870	325.785		239	10230.9	567.815		239	3580.82	198.735
													240	4	15346.4	851.723		240	5870	325.785		240	10230.9	567.815		240	3580.82	198.735
													241	4.01667	7673.18	425.862		241	2935	162.892		241	5115.45	283.908		241	1790.41	99.3677
													242	4.03333	3836.59	212.931		242	1467.5	81.4462		242	2557.73	141.954		242	895.205	49.6839
													243	4.05	1918.3	106.465		243	733.75	40.7231		243	1278.86	70.9769		243	447.602	24.8419
													244	4.06667	959.148	53.2327		244	366.875	20.3616		244	639.432	35.4885		244	223.801	12.421
													245	4.08333	479.574	26.6163		245	183.438	10.1808		245	319.716	17.7442		245	111.901	6.21048
													246	4.1	239.787	13.3082		246	91.7188	5.09039		246	159.858	8.87212		246	55.9503	3.10524
													247	4.11667	119.893	6.65409		247	45.8594	2.5452		247	79.929	4.43606		247	27.9751	1.55262
													248	4.13333	59.9467	3.32704		248	22.9297	1.2726		248	39.9645	2.21803		248	13.9876	0.77631
													249	4.15	29.9734	1.66352		249	11.4648	0.636299		249	19.9822	1.10901		249	6.99379	0.388155
													250	4.16667	14.9867	0.831761		250	5.73242	0.318149		250	9.99112	0.554507		250	3.49689	0.194078
													251	4.18333	7.49334	0.41588		251	2.86621	0.159075		251	4.99556	0.277254		251	1.74845	0.0970388
													252	4.2	3.74667	0.20794		252	1.43311	0.0795374		252	2.49778	0.138627		252	0.874223	0.0485194
													253	4.21667	1.87334	0.10397		253	0.716553	0.0397687		253	1.24889	0.0693134		253	0.437112	0.0242597
													254	4.23333	0.936668	0.0519851		254	0.358276	0.0198843		254	0.624445	0.0346567		254	0.218556	0.0121298
													255	4.25	0.468334	0.0259925		255	0.179138	0.00994217		255	0.312223	0.0173284		255	0.109278	0.00606492
													256	4.26667	0.234167	0.0129963		256	0.0895691	0.00497108		256	0.156111	0.00866418		256	0.0546389	0.00303246
													257	4.28333	0.117083	0.00649813		257	0.0447845	0.00248554		257	0.0780556	0.00433209		257	0.0273195	0.00151623
													258	4.3	0.0585417	0.00324907		258	0.0223923	0.00124277		258	0.0390278	0.00216604		258	0.0136597	0.000758115
													259	4.31667	0.0292709	0.00162453		259	0.0111961	0.000621386		259	0.0195139	0.00108302		259	0.00682987	0.000379058
													260	4.33333	0.0146354	0.000812267		260	0.00559807	0.000310693		260	0.00975696	0.000541511		260	0.00341493	0.000189529
													261	4.35	0.00731772	0.000406133		261	0.00279903	0.000155346		261	0.00487848	0.000270756		261	0.00170747	9.47644e-05
													262	4.36667	0.00365886	0.000203067		262	0.00139952	7.76732e-05		262	0.00243924	0.000135378		262	0.000853734	4.73822e-05
													263	4.38333	0.00182943	0.000101533		263	0.000699759	3.88366e-05		263	0.00121962	6.76889e-05		263	0.000426867	2.36911e-05
													264	4.4	0.000914715	5.07667e-05		264	0.000349879	1.94183e-05		264	0.00060981	3.38444e-05		264	0.000213433	1.18456e-05
													265	4.41667	0.000457357	2.53833e-05		265	0.00017494	9.70915e-06		265	0.000304905	1.69222e-05		265	0.000106717	5.92278e-06
													266	4.43333	0.000228679	1.26917e-05		266	8.74698e-05	4.85457e-06		266	0.000152452	8.46111e-06		266	5.33583e-05	2.96139e-06
													267	4.45	0.000114339	6.34583e-06		267	4.37349e-05	2.42729e-06		267	7.62262e-05	4.23055e-06		267	2.66792e-05	1.48069e-06
													268	4.46667	5.71697e-05	3.17292e-06		268	2.18675e-05	1.21364e-06		268	3.81131e-05	2.11528e-06		268	1.33396e-05	7.40347e-07
													269	4.48333	2.85848e-05	1.58646e-06		269	1.09337e-05	6.06822e-07		269	1.90566e-05	1.05764e-06		269	6.66979e-06	3.70174e-07
													270	4.5	1.42924e-05	7.93229e-07		270	5.46686e-06	3.03411e-07		270	9.52828e-06	5.28819e-07		270	3.3349e-06	1.85087e-07
													271	4.51667	7.14621e-06	3.96615e-07		271	2.73343e-06	1.51705e-07		271	4.76414e-06	2.6441e-07		271	1.66745e-06	9.25434e-08
													272	4.53333	3.5731e-06	1.98307e-07		272	1.36672e-06	7.58527e-08		272	2.38207e-06	1.32205e-07		272	8.33724e-07	4.62717e-08
													273	4.55	1.78655e-06	9.91536e-08		273	6.83358e-07	3.79264e-08		273	1.19103e-06	6.61024e-08		273	4.16862e-07	2.31358e-08
													274	4.56667	8.93276e-07	4.95768e-08		274	3.41679e-07	1.89632e-08		274	5.95517e-07	3.30512e-08		274	2.08431e-07	1.15679e-08
													275	4.58333	4.46638e-07	2.47884e-08		275	1.70839e-07	9.48159e-09		275	2.97759e-07	1.65256e-08		275	1.04216e-07	5.78396e-09
													276	4.6	2.23319e-07	1.23942e-08		276	8.54197e-08	4.7408e-09		276	1.48879e-07	8.2628e-09		276	5.21078e-08	2.89198e-09
													277	4.61667	1.11659e-07	6.1971e-09		277	4.27099e-08	2.3704e-09		277	7.44397e-08	4.1314e-09		277	2.60539e-08	1.44599e-09
													278	4.63333	5.58297e-08	3.09855e-09		278	2.13549e-08	1.1852e-09		278	3.72198e-08	2.0657e-09		278	1.30269e-08	7.22995e-10
													279	4.65	2.79149e-08	1.54928e-09		279	1.06775e-08	5.92599e-10		279	1.86099e-08	1.03285e-09		279	6.51347e-09	3.61498e-10
													280	4.66667	1.39574e-08	7.74638e-10		280	5.33873e-09	2.963e-10		280	9.30496e-09	5.16425e-10		280	3.25674e-09	1.80749e-10
													281	4.68333	6.97872e-09	3.87319e-10		281	2.66937e-09	1.4815e-10		281	4.65248e-09	2.58213e-10		281	1.62837e-09	9.03744e-11
													282	4.7	3.48936e-09	1.93659e-10		282	1.33468e-09	7.40749e-11		282	2.32624e-09	1.29106e-10		282	8.14184e-10	4.51872e-11
													283	4.71667	1.74468e-09	9.68297e-11		283	6.67342e-10	3.70375e-11		283	1.16312e-09	6.45531e-11		283	4.07092e-10	2.25936e-11
													284	4.73333	8.7234e-10	4.84149e-11		284	3.33671e-10	1.85187e-11		284	5.8156e-10	3.22766e-11		284	2.03546e-10	1.12968e-11
													285	4.75	4.3617e-10	2.42074e-11		285	1.66835e-10	9.25937e-12		285	2.9078e-10	1.61383e-11		285	1.01773e-10	5.6484e-12
													286	4.76667	2.18085e-10	1.21037e-11		286	8.34177e-11	4.62968e-12		286	1.4539e-10	8.06914e-12		286	5.08865e-11	2.8242e-12
													287	4.78333	1.09042e-10	6.05186e-12		287	4.17089e-11	2.31484e-12		287	7.2695e-11	4.03457e-12		287	2.54432e-11	1.4121e-12
													288	4.8	5.45212e-11	3.02593e-12		288	2.08544e-11	1.15742e-12		288	3.63475e-11	2.01729e-12		288	1.27216e-11	7.0605e-13
													289	4.81667	2.72606e-11	1.51296e-12		289	1.04272e-11	5.7871e-13		289	1.81737e-11	1.00864e-12		289	6.36081e-12	3.53025e-13
													290	4.83333	1.36303e-11	7.56482e-13		290	5.21361e-12	2.89355e-13		290	9.08687e-12	5.04321e-13		290	3.18041e-12	1.76513e-13
													291	4.85	6.81515e-12	3.78241e-13		291	2.6068e-12	1.44678e-13		291	4.54344e-12	2.52161e-13		291	1.5902e-12	8.82563e-14
													292	4.86667	3.40758e-12	1.89121e-13		292	1.3034e-12	7.23388e-14		292	2.27172e-12	1.2608e-13		292	7.95101e-13	4.41281e-14
													293	4.88333	1.70379e-12	9.45603e-14		293	6.51701e-13	3.61694e-14		293	1.13586e-12	6.30402e-14		293	3.97551e-13	2.20641e-14
													294	4.9	8.51894e-13	4.72801e-14		294	3.2585e-13	1.80847e-14		294	5.6793e-13	3.15201e-14		294	1.98775e-13	1.1032e-14
													295	4.91667	4.25947e-13	2.36401e-14		295	1.62925e-13	9.04235e-15		295	2.83965e-13	1.576e-14		295	9.93877e-14	5.51602e-15
													296	4.93333	2.12974e-13	1.182e-14		296	8.14626e-14	4.52118e-15		296	1.41982e-13	7.88002e-15		296	4.96938e-14	2.75801e-15
													297	4.95	1.06487e-13	5.91002e-15		297	4.07313e-14	2.26059e-15		297	7.09912e-14	3.94001e-15		297	2.48469e-14	1.379e-15
													298	4.96667	5.32434e-14	2.95501e-15		298	2.03657e-14	1.13029e-15		298	3.54956e-14	1.97001e-15		298	1.24235e-14	6.89502e-16
													299	4.98333	2.66217e-14	1.4775e-15		299	1.01828e-14	5.65147e-16		299	1.77478e-14	9.85003e-16		299	6.21173e-15	3.44751e-16
													300	5	1.33108e-14	7.38752e-16		300	5.09141e-15	2.82573e-16		300	8.8739e-15	4.92501e-16		300	3.10586e-15	1.72375e-16
													301	5.01667	6.65542e-15	3.69376e-16		301	2.54571e-15	1.41287e-16		301	4.43695e-15	2.46251e-16		301	1.55293e-15	8.61877e-17
													302	5.03333	3.32771e-15	1.84688e-16		302	1.27285e-15	7.06434e-17		302	2.21847e-15	1.23125e-16		302	7.76466e-16	4.30939e-17
													303	5.05	1.66386e-15	9.2344e-17		303	6.36427e-16	3.53217e-17		303	1.10924e-15	6.15627e-17		303	3.88233e-16	2.15469e-17
													304	5.06667	8.31928e-16	4.6172e-17		304	3.18213e-16	1.76608e-17		304	5.54619e-16	3.07813e-17		304	1.94117e-16	1.07735e-17
													305	5.08333	4.15964e-16	2.3086e-17		305	1.59107e-16	8.83042e-18		305	2.77309e-16	1.53907e-17		305	9.70583e-17	5.38673e-18
													306	5.1	2.07982e-16	1.1543e-17		306	7.95533e-17	4.41521e-18		306	1.38655e-16	7.69533e-18		306	4.85291e-17	2.69337e-18
													307	5.11667	1.03991e-16	5.7715e-18		307	3.97767e-17	2.20761e-18		307	6.93273e-17	3.84767e-18		307	2.42646e-17	1.34668e-18
													308	5.13333	5.19955e-17	2.88575e-18		308	1.98883e-17	1.1038e-18		308	3.46637e-17	1.92383e-18		308	1.21323e-17	6.73342e-19
													309	5.15	2.59978e-17	1.44288e-18		309	9.94417e-18	5.51901e-19		309	1.73318e-17	9.61917e-19		309	6.06614e-18	3.36671e-19
													310	5.16667	1.29989e-17	7.21438e-19		310	4.97208e-18	2.75951e-19		310	8.66592e-18	4.80958e-19		310	3.03307e-18	1.68335e-19
													311	5.18333	6.49944e-18	3.60719e-19		311	2.48604e-18	1.37975e-19		311	4.33296e-18	2.40479e-19		311	1.51654e-18	8.41677e-20
													312	5.2	3.24972e-18	1.80359e-19		312	1.24302e-18	6.89877e-20		312	2.16648e-18	1.2024e-19		312	7.58268e-19	4.20839e-20
													313	5.21667	1.62486e-18	9.01797e-20		313	6.2151e-19	3.44938e-20		313	1.08324e-18	6.01198e-20		313	3.79134e-19	2.10419e-20
													314	5.23333	8.1243e-19	4.50898e-20		314	3.10755e-19	1.72469e-20		314	5.4162e-19	3.00599e-20		314	1.89567e-19	1.0521e-20
													315	5.25	4.06215e-19	2.25449e-20		315	1.55378e-19	8.62346e-21		315	2.7081e-19	1.50299e-20		315	9.47835e-20	5.26048e-21
													316	5.26667	2.03107e-19	1.12725e-20		316	7.76888e-20	4.31173e-21		316	1.35405e-19	7.51497e-21		316	4.73917e-20	2.63024e-21
													317	5.28333	1.01554e-19	5.63623e-21		317	3.88444e-20	2.15586e-21		317	6.77025e-20	3.75749e-21		317	2.36959e-20	1.31512e-21
													318	5.3	5.07769e-20	2.81812e-21		318	1.94222e-20	1.07793e-21		318	3.38512e-20	1.87874e-21		318	1.18479e-20	6.5756e-22
													319	5.31667	2.53884e-20	1.40906e-21		319	9.7111e-21	5.38966e-22		319	1.69256e-20	9.39372e-22		319	5.92397e-21	3.2878e-22
													320	5.33333	1.26942e-20	7.04529e-22		320	4.85555e-21	2.69483e-22		320	8.46281e-21	4.69686e-22		320	2.96198e-21	1.6439e-22
													321	5.35	6.34711e-21	3.52264e-22		321	2.42778e-21	1.34742e-22		321	4.2314e-21	2.34843e-22		321	1.48099e-21	8.2195e-23
													322	5.36667	3.17355e-21	1.76132e-22		322	1.21389e-21	6.73708e-23		322	2.1157e-21	1.17421e-22		322	7.40496e-22	4.10975e-23
													323	5.38333	1.58678e-21	8.80661e-23		323	6.06944e-22	3.36854e-23		323	1.05785e-21	5.87107e-23		323	3.70248e-22	2.05488e-23
													324	5.4	7.93388e-22	4.40331e-23		324	3.03472e-22	1.68427e-23		324	5.28926e-22	2.93554e-23		324	1.85124e-22	1.02744e-23
													325	5.41667	3.96694e-22	2.20165e-23		325	1.51736e-22	8.42134e-24		325	2.64463e-22	1.46777e-23		325	9.2562e-23	5.13719e-24
													326	5.43333	1.98347e-22	1.10083e-23		326	7.5868e-23	4.21067e-24		326	1.32231e-22	7.33884e-24		326	4.6281e-23	2.56859e-24
													327	5.45	9.91736e-23	5.50413e-24		327	3.7934e-23	2.10534e-24		327	6.61157e-23	3.66942e-24		327	2.31405e-23	1.2843e-24
													328	5.46667	4.95868e-23	2.75207e-24		328	1.8967e-23	1.05267e-24		328	3.30579e-23	1.83471e-24		328	1.15702e-23	6.42149e-25
													329	5.48333	2.47934e-23	1.37603e-24		329	9.4835e-24	5.26334e-25		329	1.65289e-23	9.17355e-25		329	5.78512e-24	3.21074e-25
													330	5.5	1.23967e-23	6.88017e-25		330	4.74175e-24	2.63167e-25		330	8.26446e-24	4.58678e-25		330	2.89256e-24	1.60537e-25
													331	5.51667	6.19835e-24	3.44008e-25		331	2.37087e-24	1.31584e-25		331	4.13223e-24	2.29339e-25		331	1.44628e-24	8.02686e-26
													332	5.53333	3.09917e-24	1.72004e-25		332	1.18544e-24	6.57918e-26		332	2.06612e-24	1.14669e-25		332	7.2314e-25	4.01343e-26
													333	5.55	1.54959e-24	8.60021e-26		333	5.92719e-25	3.28959e-26		333	1.03306e-24	5.73347e-26		333	3.6157e-25	2.00671e-26
													334	5.56667	7.74793e-25	4.3001e-26		334	2.96359e-25	1.64479e-26		334	5.16529e-25	2.86674e-26		334	1.80785e-25	1.00336e-26
													335	5.58333	3.87397e-25	2.15005e-26		335	1.4818e-25	8.22397e-27		335	2.58264e-25	1.43337e-26		335	9.03926e-26	5.01679e-27
													336	5.6	1.93698e-25	1.07503e-26		336	7.40898e-26	4.11198e-27		336	1.29132e-25	7.16684e-27		336	4.51963e-26	2.50839e-27
													337	5.61667	9.68492e-26	5.37513e-27		337	3.70449e-26	2.05599e-27		337	6.45661e-26	3.58342e-27		337	2.25981e-26	1.2542e-27
													338	5.63333	4.84246e-26	2.68756e-27		338	1.85225e-26	1.028e-27		338	3.22831e-26	1.79171e-27		338	1.12991e-26	6.27098e-28
													339	5.65	2.42123e-26	1.34378e-27		339	9.26123e-27	5.13998e-28		339	1.61415e-26	8.95855e-28		339	5.64953e-27	3.13549e-28
													340	5.66667	1.21061e-26	6.71891e-28		340	4.63061e-27	2.56999e-28		340	8.07076e-27	4.47927e-28		340	2.82477e-27	1.56775e-28
													341	5.68333	6.05307e-27	3.35946e-28		341	2.31531e-27	1.285e-28		341	4.03538e-27	2.23964e-28		341	1.41238e-27	7.83873e-29
													342	5.7	3.02654e-27	1.67973e-28		342	1.15765e-27	6.42498e-29		342	2.01769e-27	1.11982e-28		342	7.06192e-28	3.91936e-29
													343	5.71667	1.51327e-27	8.39864e-29		343	5.78827e-28	3.21249e-29		343	1.00885e-27	5.59909e-29		343	3.53096e-28	1.95968e-29
													344	5.73333	7.56634e-28	4.19932e-29		344	2.89413e-28	1.60624e-29		344	5.04423e-28	2.79955e-29		344	1.76548e-28	9.79841e-30
													345	5.75	3.78317e-28	2.09966e-29		345	1.44707e-28	8.03122e-30		345	2.52211e-28	1.39977e-29		345	8.8274e-29	4.89921e-30
													346	5.76667	1.89159e-28	1.04983e-29		346	7.23533e-29	4.01561e-30		346	1.26106e-28	6.99887e-30		346	4.4137e-29	2.4496e-30
													347	5.78333	9.45793e-29	5.24915e-30		347	3.61767e-29	2.00781e-30		347	6.30528e-29	3.49943e-30		347	2.20685e-29	1.2248e-30
													348	5.8	4.72896e-29	2.62457e-30		348	1.80883e-29	1.0039e-30		348	3.15264e-29	1.74972e-30		348	1.10342e-29	6.12401e-31
													349	5.81667	2.36448e-29	1.31229e-30		349	9.04417e-30	5.01951e-31		349	1.57632e-29	8.74858e-31		349	5.51712e-30	3.062e-31
													350	5.83333	1.18224e-29	6.56144e-31		350	4.52208e-30	2.50976e-31		350	7.88161e-30	4.37429e-31		350	2.75856e-30	1.531e-31
													351	5.85	5.9112e-30	3.28072e-31		351	2.26104e-30	1.25488e-31		351	3.9408e-30	2.18715e-31		351	1.37928e-30	7.65501e-32
													352	5.86667	2.9556e-30	1.64036e-31		352	1.13052e-30	6.27439e-32		352	1.9704e-30	1.09357e-31		352	6.8964e-31	3.8275e-32
													353	5.88333	1.4778e-30	8.2018e-32		353	5.6526e-31	3.1372e-32		353	9.85201e-31	5.46786e-32		353	3.4482e-31	1.91375e-32
													354	5.9	7.38901e-31	4.1009e-32		354	2.8263e-31	1.5686e-32		354	4.926e-31	2.73393e-32		354	1.7241e-31	9.56876e-33
													355	5.91667	3.6945e-31	2.05045e-32		355	1.41315e-31	7.84299e-33		355	2.463e-31	1.36697e-32		355	8.62051e-32	4.78438e-33
													356	5.93333	1.84725e-31	1.02522e-32		356	7.06576e-32	3.92149e-33		356	1.2315e-31	6.83483e-33		356	4.31025e-32	2.39219e-33
													357	5.95	9.23626e-32	5.12612e-33		357	3.53288e-32	1.96075e-33		357	6.1575e-32	3.41741e-33		357	2.15513e-32	1.1961e-33
													358	5.96667	4.61813e-32	2.56306e-33		358	1.76644e-32	9.80374e-34		358	3.07875e-32	1.70871e-33		358	1.07756e-32	5.98048e-34
													359	5.98333	2.30906e-32	1.28153e-33		359	8.83219e-33	4.90187e-34		359	1.53938e-32	8.54354e-34		359	5.38782e-33	2.99024e-34
													360	6	1.15453e-32	6.40765e-34		360	4.4161e-33	2.45093e-34		360	7.69688e-33	4.27177e-34		360	2.69391e-33	1.49512e-34

## Sheet: Fig 6C
		Date	Channel	Time - Rate	Conc during Clamp	pk ht - 1st phase	plateau ht - 2nd phase
	1	2020-09-17		15 - 6.5	83.25	1.02	1
	2	2020-09-17		15 - 11.5	149.85	1.05	1.01
	3	2020-09-29		32 - 6.5	183.15	1.18	1
	4	2020-09-29	4	21 - 11.5	210.9	1.23	1.22
	5	2020-09-29		27.5 - 11.5	271.95	1.36	1.33
	6	2020-09-29		45 - 6.5	255.3	1.34	1.32
	7	2020-09-17		30 - 11.5	299.7	1.3	1.29
	8	2020-09-03	3	60 - 6.5	338.55	1.34	1.11
	9	2020-09-03	1	90 - 6.5	510.6	1.38	0.84
	10	2020-09-03	4	60 - 11.5	593.85	1.4	0.83
	11	2020-09-03	2	90 11.5	893.55	1.29	0.64

## Sheet: Fig 6D  
			Normalized Calcium		Representative Profile
		Adj time	060921	021821	070121
		-72.5	-0.0533336	-3.12031	-0.300507
		-72	-0.0577252	-3.12031	-0.297905
		-71.5	-0.0571396	-3.12031	-0.303792
		-71	-0.0530408	-3.12031	-0.30256
		-70.5	-0.0625559	-3.12031	-0.295304
		-70	-0.0679722	-3.12031	-0.296947
		-69.5	-0.0754379	-3.12031	-0.295715
		-69	-0.0758771	-3.12031	-0.296673
		-68.5	-0.0681186	-3.12031	-0.290376
		-68	-0.0676794	-3.12031	-0.29284
		-67.5	-0.0621168	-3.12031	-0.289007
		-67	-0.0684114	-3.12031	-0.284352
		-66.5	-0.0758771	-3.12031	-0.280929
		-66	-0.0758771	-3.12031	-0.280929
		-65.5	-0.0786584	-3.12031	-0.279697
		-65	-0.072071	-3.12031	-0.278191
		-64.5	-0.0769018	-3.12031	-0.270798
		-64	-0.0777801	-3.12031	-0.270114
		-63.5	-0.0796832	-3.12031	-0.267923
		-63	-0.072071	-3.12031	-0.267102
		-62.5	-0.0668011	-3.12031	-0.262036
		-62	-0.070168	-3.12031	-0.267649
		-61.5	-0.0628487	-3.12031	-0.262995
		-61	-0.0624095	-3.12031	-0.260393
		-60.5	-0.0653373	-3.12031	-0.250673
		-60	-0.0666547	-3.12031	-0.246566
		-59.5	-0.0549438	-3.12031	-0.244375
		-59	-0.0654836	-3.12031	-0.237804
		-58.5	-0.0689969	-3.12031	-0.236983
		-58	-0.0631415	-3.12031	-0.23534
		-57.5	-0.0627023	-3.12031	-0.230685
		-57	-0.0688505	-3.12031	-0.229179
		-56.5	-0.0539191	-3.12031	-0.228495
		-56	-0.0530408	-3.12031	-0.216858
		-55.5	-0.0405979	-3.12031	-0.220828
		-55	-0.0400124	-3.12031	-0.2185
		-54.5	-0.0468925	-3.12031	-0.216036
		-54	-0.041769	-3.12031	-0.212614
		-53.5	-0.0473317	-3.12031	-0.21275
		-53	-0.0389877	-3.12031	-0.206453
		-52.5	-0.0416226	-3.12031	-0.20659
		-52	-0.0413298	-0.212559	-0.201935
		-51.5	-0.0376702	-0.210851	-0.197828
		-51	-0.0442576	-0.206657	-0.194816
		-50.5	-0.0410371	-0.201998	-0.191667
		-50	-0.0367919	-0.202775	-0.186328
		-49.5	-0.0394268	-0.198426	-0.186054
		-49	-0.0376702	-0.195941	-0.184548
		-48.5	-0.0369382	-0.194544	-0.182768
		-48	-0.0247881	-0.189263	-0.175375
		-47.5	-0.0201038	-0.18771	-0.170584
		-47	-0.0253737	-0.185536	-0.168119
		-46.5	-0.0176152	-0.181498	-0.167435
		-46	-0.026252	-0.182585	-0.163875
		-45.5	-0.024349	-0.178392	-0.159494
		-45	-0.0135164	-0.173888	-0.156482
		-44.5	-0.0167369	-0.171248	-0.153334
		-44	-0.0180544	-0.168763	-0.152923
		-43.5	-0.0174688	-0.164104	-0.150732
		-43	-0.00531872	-0.163794	-0.14553
		-42.5	-0.0158586	-0.157115	-0.145667
		-42	-0.0151266	-0.157271	-0.14553
		-41.5	-0.010735	-0.155097	-0.140875
		-41	-0.00590426	-0.15665	-0.134988
		-40.5	0.0101983	-0.151525	-0.134715
		-40	0.002147	-0.149972	-0.132661
		-39.5	9.75911e-05	-0.148729	-0.128006
		-39	0.0055139	-0.145468	-0.126226
		-38.5	0.0140043	-0.140032	-0.122119
		-38	0.00873441	-0.137081	-0.117328
		-37.5	0.0164929	-0.13615	-0.116917
		-37	0.0189815	-0.134907	-0.11281
		-36.5	0.0181032	-0.131956	-0.112947
		-36	0.0295213	-0.129316	-0.109661
		-35.5	0.0314243	-0.13149	-0.103637
		-35	0.0317171	-0.131956	-0.104459
		-34.5	0.0353768	-0.128695	-0.098024
		-34	0.0359623	-0.129006	-0.0978871
		-33.5	0.0621655	-0.126365	-0.0952859
		-33	0.0399148	-0.125278	-0.0913157
		-32.5	0.0403539	-0.118134	-0.0892621
		-32	-1.01231	-0.114718	-0.0847442
		-31.5	-0.0136628	-0.112854	-0.0818692
		-31	-2.92354	-0.113165	-0.0818692
		-30.5	-0.00487956	-0.110058	-0.0729704
		-30	-0.00385485	-0.101051	-0.0711906
		-29.5	-0.0190791	-0.0993425	-0.0703692
		-29	-0.00824645	-0.10074	-0.0665358
		-28.5	-0.010735	-0.0981001	-0.0653037
		-28	-0.0161513	-0.0979448	-0.064893
		-27.5	-0.00605065	-0.0971683	-0.0611965
		-27	-0.00136628	-0.0906455	-0.0594168
		-26.5	-0.00853922	-0.0878501	-0.0613335
		-26	-0.00165905	-0.0838122	-0.0606489
		-25.5	-0.00692897	-0.0844334	-0.0622918
		-25	-0.00707536	-0.0802402	-0.0755716
		-24.5	-0.00121989	-0.0802402	-0.0831014
		-24	-0.00121989	-0.0757364	-0.0943276
		-23.5	-0.00385485	-0.0835016	-0.0943276
		-23	-0.00590426	-0.0721644	-0.096518
		-22.5	0.00463558	-0.0735621	-0.0913157
		-22	0.0077097	-0.0706114	-0.0935061
		-21.5	0.00170784	-0.0678159	-0.0876192
		-21	0.00287894	-0.0682818	-0.0843335
		-20.5	0.000975911	-0.0631568	-0.0839228
		-20	-0.0101495	-0.060206	-0.0818692
		-19.5	-0.00853922	-0.0605166	-0.0766668
		-19	-0.0299117	-0.0508878	-0.0774882
		-18.5	-0.0299117	-0.0538386	-0.0724228
		-18	-0.0214213	-0.0502666	-0.0736549
		-17.5	-0.0203965	-0.0487136	-0.0672204
		-17	-0.0247881	-0.0437439	-0.0670835
		-16.5	-0.0234707	-0.0438992	-0.0657144
		-16	-0.0252273	-0.0452969	-0.0647561
		-15.5	-0.0186399	-0.0372211	-0.0585954
		-15	-0.0221532	-0.0330279	-0.0543513
		-14.5	-0.0236171	-0.0306983	-0.0528453
		-14	-0.0242026	-0.0311643	-0.0529822
		-13.5	-0.0233243	-0.0286794	-0.0538037
		-13	-0.0231779	-0.0268158	-0.0472322
		-12.5	-0.019811	-0.0261945	-0.0424406
		-12	-0.0151266	-0.0257286	-0.0433989
		-11.5	-0.0190791	-0.0226226	-0.043262
		-11	-0.0098567	-0.0280582	-0.0362798
		-10.5	-0.0108814	-0.0282135	-0.036006
		-10	-0.00868561	-0.0275923	-0.0316251
		-9.5	-0.008832	-0.0232438	-0.0325834
		-9	-0.00605065	-0.0207589	-0.0276548
		-8.5	-0.0104423	-0.0209142	-0.0290239
		-8	-0.00561149	-0.0188953	-0.0220417
		-7.5	-0.00736813	-0.0162551	-0.0228631
		-7	-0.0139555	-0.016721	-0.0197143
		-6.5	0.0055139	-0.0137703	-0.0195774
		-6	0.00624583	-0.0109748	-0.013006
		-5.5	-0.00356208	-0.00957706	-0.0156072
		-5	-0.00824645	-0.00740281	-0.0146488
		-4.5	-0.00487956	-0.00445204	-0.0120476
		-4	0.00639222	0.0012942	-0.00972026
		-3.5	-0.00605065	0.00253663	-0.0026012
		-3	-0.00927116	0.00269193	-0.00177977
		-2.5	-0.0010735	0.00440027	0.00397025
		-2	0.000536751	0.00672982	0.00397025
		-1.5	-0.00575788	0.00626391	0.00670835
		-1	-0.00283014	0.00968059	0.00862502
		-0.5	0.0011223	0.00859347	0.00670835
		0	-0.00180544	0.00424497	0.00451787
		0.5	0.00580667	0.00098359	-0.000136905
		1	0.00361087	-0.00957706	-0.010131
		1.5	0.000390365	-0.0313196	-0.0242322
		2	-0.00897838	-0.0476264	-0.0433989
		2.5	-0.0170297	-0.0564787	-0.0663989
		3	0.0077097	-0.0474711	-0.0564049
		3.5	0.0766578	0.0466429	0.255465
		4	1.52018	0.757468	0.839912
		4.5	1.53101	1.14402	1.00557
		5	1.17309	1.2313	1.09524
		5.5	1.01734	1.20723	1.18382
		6	0.939168	1.2212	1.18834
		6.5	0.854849	1.17228	1.1689
		7	0.812836	1.16483	1.12413
		7.5	0.78678	1.11932	1.08566
		8	0.774044	1.10411	1.03884
		8.5	0.741839	1.0659	1.00817
		9	0.736715	1.09121	0.962716
		9.5	0.738911	1.06792	0.925615
		10	0.718856	1.10271	0.896591
		10.5	0.723394	0.999275	0.811573
		11	0.730128	1.07289	0.8024
		11.5	0.728957	1.03872	0.815543
		12	0.759113	0.991044	0.877972
		12.5	0.772141	0.98359	0.801579
		13	0.797466	0.993374	0.833478
		13.5	0.79	0.995703	0.98202
		14	0.808591	1.03795	0.946151
		14.5	0.83011	1.07227	0.918496
		15	0.850751	0.95843	0.877835
		15.5	0.80903	0.997567	0.942454
		16	0.872562	0.975358	1.00666
		16.5	0.846945	1.04152	0.933966
		17	0.888958	1.0089	0.929996
		17.5	0.8771	0.957188	0.989413
		18	0.917503	0.93529	1.03897
		18.5	0.887786	1.0044	1.02939
		19	0.865975	1.00828	0.928901
		19.5	0.87388	0.978775	1.01707
		20	0.950294	0.958275	0.960389
		20.5	0.906817	0.904851	0.993246
		21	0.946927	1.05068	0.988865
		21.5	0.917503	0.961071	0.996418
		22	0.942096	1.04571	1.01125
		22.5	0.937997	0.95843	1.00689
		23	0.930385	0.997567	0.99895
		23.5	0.916478	0.975358	0.964428
		24	0.911355	1.04152	0.915233
		24.5	0.972544	1.0089	0.865377
		25	0.982791	0.957188	0.848378
		25.5	1.03534	0.93529	0.861361
		26	0.984255	1.0044	1.2394
		26.5	0.960541	1.00828	1.00516
		27	1.02949	0.978775	1.00584
		27.5	0.953514	0.958275	0.964085
		28	0.968592	0.904851	0.975175
		28.5	1.0513	1.05068	0.934103
		29	1.0128	0.961071	1.04527
		29.5	1.02773	1.04571	1.02569
		30	0.95044	1.0089	0.934377
		30.5	0.930092	0.957188	1.05581
		31	0.977229	0.992908	1.06567
		31.5	1.01178	0.97862	0.97271
		32	0.963468	1.02257	0.956555
		32.5	1.07516	0.982347	1.00981
		33	1.00138	0.889165	0.917674
		33.5	1.09946	1.0249	0.955597
		34	0.97679	0.899726	1.01789
		34.5	0.995527	1.11467	0.960389
		35	1.0494	0.918362	0.984758
		35.5	1.01075	0.95843	1.01269
		36	0.982499	1.06497	1.0747
		36.5	1.09551	0.984987	1.01789
		37	1.04749	0.955014	0.990919
		37.5	0.904914	1.06512	0.912746
		38	0.897302	1.09417	0.777621
		38.5	1.30001	0.931408	0.717519
		39	1.52106	0.951752	0.775567
		39.5	1.5881	0.950665	0.915895
		40	1.60098	0.93032	1.06882
		40.5	1.59527	0.95843	1.2394
		41	1.73756	0.8331	1.34523
		41.5	1.94602	0.998343	1.32168
		42	2.13368	0.877983	1.34098
		42.5	2.24172	1.0117	1.36494
		43	2.37566	0.951597	1.41204
		43.5	2.5099	0.964021	1.49692
		44	2.58163	1.06186	1.62178
		44.5	2.64282	1.02521	1.70844
		45	2.68907	0.912616	1.79482
		45.5	2.7103	0.899881	1.88327
		46	2.74514	1.00564	1.94337
		46.5	2.74558	0.810426	1.99909
		47	2.77837	0.992287	2.05344
		47.5	2.85537	0.884351	2.093
		48	2.89255	0.833256	2.11984
		48.5	2.9312	0.737744	2.15584
		49	2.96692	0.771911	2.19308
		49.5	3.0183	0.754517	2.22854
		50	3.05138	0.82021	2.26578
		50.5	3.07802	0.953616	2.31014
		51	3.10862	1.03857	2.33889
		51.5	3.1013	1.14775	2.3764
		52	3.1316	1.18284	2.39118
		52.5	3.1619	1.24916	2.41843
		53	3.17859	1.24543	2.45046
		53.5	3.16922	1.24201	2.44567
		54	3.17566	1.25087	2.4799
		54.5	3.17479	1.22773	2.5044
		55	3.18123	1.21282	2.51426
		55.5	3.20977	1.21033	2.52781
		56	3.21153	1.19527	2.54493
		56.5	3.20875	1.16887	2.55876
		57	3.20362	1.16297	2.57039
		57.5	3.2168	1.15815	2.57902
		58	3.2168	1.15272	2.59011
		58.5	3.22514	1.17896	2.60749
		59	3.23539	1.19061	2.61393
		59.5	3.24037	1.21577	2.63337
		60	3.24974	1.23689	2.64405
		60.5	3.27506	1.26376	2.65637
		61	3.2979	1.29094	2.66691
		61.5	3.30434	1.32106	2.66705
		62	3.32351	1.35663	2.68608
		62.5	3.32337	1.38505	2.68868
		63	3.34108	1.42776	2.69799
		63.5	3.34284	1.45338	2.70853
		64	3.36245	1.48569	2.73112
		64.5	3.40081	1.52808	2.73317
		65	3.41091	1.56955	2.72236
		65.5	3.409	1.59968	2.73618
		66	3.42159	1.64441	2.75124
		66.5	3.44458	1.67469	2.74385
		67	3.43799	1.72237	2.75275
		67.5	3.45482	1.75188	2.7674
		68	3.46829	1.79163	2.77219
		68.5	3.48103	1.83916	2.77561
		69	3.47781	1.88528	2.78301
		69.5	3.50255	1.93793	2.78876
		70	3.50913	1.98437	2.79943
		70.5	3.53929	2.04431	2.79957
		71	3.54968	2.10286	2.81134
		71.5	3.56505	2.1625	2.80779
		72	3.56271	2.22307	2.82462
		72.5	3.57325	2.29109	2.82408
		73	3.59184	2.3397	2.82955
		73.5	3.6138	2.37635	2.84475
		74	3.61131	2.39949	2.84393
		74.5	3.622	2.41984	2.85557
		75	3.64835	2.44702	2.85995
		75.5	3.65201	2.46441	2.87898
		76	3.66386	2.49469	2.88021
		76.5	3.67894	2.51302	2.88254
		77	3.70734	2.53414	2.88336
		77.5	3.71159	2.55542	2.9028
		78	3.71027	2.56318	2.90157
		78.5	3.71525	2.57809	2.90307
		79	3.7413	2.59999	2.90896
		79.5	3.7375	2.61707	2.92169
		80	3.74774	2.61583	2.92908
		80.5	3.76926	2.63649	2.93743
		81	3.76472	2.64984	2.93497
		81.5	3.77409	2.6604	2.92183
		82	3.79839	2.66988	2.94852
		82.5	3.80337	2.6691	2.9566
		83	3.82723	2.67919	2.96139
		83.5	3.81947	2.69162	2.96002
		84	3.84977	2.69069	2.9807
		84.5	3.84875	2.69022	2.98699
		85	3.8587	2.70032	2.97467
		85.5	3.88988	2.70668	2.98686
		86	3.87817	2.71119	2.99315
		86.5	3.88564	2.71429	2.99466
		87	3.91492	2.72051	2.99726
		87.5	3.91389	2.72563	2.99726
		88	3.93644	2.73402	3.01095
		88.5	3.95693	2.73588	3.01862
		89	3.96322	2.73044	3.02026
		89.5	3.9644	2.73712	3.02724
		90	3.98723	2.74085	3.02916
		90.5	4.00553	2.73557	3.03669
		91	4.01461	2.7511	3.04942
		91.5	4.01914	2.74629	3.05682
		92	4.05398	2.75265	3.06476
		92.5	4.03803	2.75172	3.06051
		93	4.05135	2.75887	3.07119
		93.5	4.0572	2.77393	3.07612
		94	4.07433	2.76554	3.0842
		94.5	4.08077	2.75157	3.07817
		95	4.08502	2.75809	3.07667
		95.5	4.10961	2.76787	3.0727
		96	4.11151	2.76648	3.05285
		96.5	4.12674	2.76477	3.03765
		97	4.13362	2.77579	2.98836
		97.5	4.14709	2.7716	2.95674
		98	4.14855	2.77595	2.90225
		98.5	4.14826	2.77735	2.84229
		99	4.15528	2.79754	2.74878
		99.5	4.15411	2.7876	2.65363
		100	4.15836	2.78465	2.51495
		100.5	4.17065	2.78496	2.32314
		101	4.16377	2.78837	1.96472
		101.5	4.17197	2.79614	1.54429
		102	4.1528	2.79365	1.229
		102.5	4.14313	2.80328	1.09866
		103	4.13362	2.80421	1.05266
		103.5	4.1244	2.80064	1.02638
		104	4.10698	2.79148	1.01118
		104.5	4.05164	2.80732	1.00598
		105	3.99938	2.8112	1.00406
		105.5	3.92311	2.81353	0.998859
		106	3.82606	2.81974	0.992698
		106.5	3.74189	2.82596	0.995026
		107	3.5772	2.82502	0.985716
		107.5	3.38236	2.83015	0.986264
		108	3.09135	2.82099	0.989823
		108.5	2.64355	2.82984	0.984347
		109	2.27319	2.83496	0.973942
		109.5	2.06108	2.8432	0.984758
		110	1.93943	2.8404	0.990645
		110.5	1.88907	2.84413	0.991056
		111	1.86711	2.8491	0.991192
		111.5	1.84516	2.84351	0.992014
		112	1.83623	2.84894	0.998585
		112.5	1.85057	2.8595	0.986811
		113	1.84457	2.8581	0.988454
		113.5	1.85818	2.86602	0.979829
		114	1.87897	2.86137	0.994341
		114.5	1.89756	2.86137	0.989276
		115	1.92201	2.8609	1.00173
		115.5	1.93445	2.85733	1.00598
		116	1.95172	2.8668	1.00078
		116.5	1.94016	2.86012	1.0016
		117	1.96095	2.86773	1.00269
		117.5	1.99447	2.86665	0.994204
		118	1.9933	2.86804	1.00187
		118.5	2.02009	2.87565	1.00269
		119	2.05712	2.87923	1.00639
		119.5	2.07645	2.87131	1.00885
		120	2.12358	2.88777	1.01337
		120.5	2.14598	2.88218	1.02542
		121	2.17701	2.8814	1.01871
		121.5	2.21098	2.88016	1.02364
		122	2.23176	2.8828	1.02323
		122.5	2.27129	2.88062	1.02597
		123	2.29764	2.87736	1.02268
		123.5	2.33467	2.88637	1.01967
		124	2.36424	2.88699	1.01625
		124.5	2.37873	2.8741	1.01939
		125	2.41021	2.88233	1.02898
		125.5	2.43992	2.87084	1.03226
		126	2.47433	2.88497	1.03623
		126.5	2.48252	2.88295	1.0413
		127	2.50521	2.87659	1.03829
		127.5	2.51297	2.87224	1.0324
		128	2.56113	2.88078	1.0335
		128.5	2.55996	2.88156	1.04075
		129	2.57972	2.87736	1.04883
		129.5	2.61339	2.87395	1.04445
		130	2.63096	2.86711	1.04062
		130.5	2.65775	2.86882	1.04637
		131	2.68483	2.87845	1.04308
		131.5	2.70986	2.86602	1.04664
		132	2.7264	2.85841	1.0554
		132.5	2.75012	2.8637	1.05006
		133	2.7753	2.87146	1.04691
		133.5	2.79813	2.86478	1.03952
		134	2.80823	2.86432	1.0402
		134.5	2.82624	2.85189	1.04048
		135	2.84278	2.84568	1.035
		135.5	2.87923	2.84894	1.03418
		136	2.88948	2.83993	1.02925
		136.5	2.89914	2.83854	1.04007
		137	2.92095	2.82953	1.03089
		137.5	2.91949	2.83046	1.03021
		138	2.93647	2.82906	1.0554
		138.5	2.94379	2.81881	1.05006
		139	2.96457	2.81462	1.04691
		139.5	2.96531	2.81167	1.03952
		140	2.98639	2.8185	1.0402
		140.5	3.00937	2.79769	1.04048
		141	2.99898	2.79521	1.035
		141.5	3.01596	2.7893	1.02925
		142	3.02093	2.79288	1.04007
		142.5	3.05387	2.77657	1.03089
		143	3.05958	2.76818	1.03021
		143.5	3.05519	2.77377	1.0554
