# Supplementary material for: Fluidics system for resolving concentration-dependent effects of dissolved gases on tissue metabolism
Source: eLife. 2021 Nov 4;10:e66716. doi: 10.7554/eLife.66716 (PMC8660022; doi:10.7554/eLife.66716)
Supplement: Figure 8—source data 1. [file elife-66716-fig8-data1.xlsx]

## Sheet: Fig. 2A
Time
	Outflow	Inflow
-137.5	118.038	143.536
-137	108.545	143.504
-136.5	108.394	143.44
-136	108.682	143.536
-135.5	108.699	143.473
-135	109.004	143.444
-134.5	109.09	143.738
-134	108.887	143.638
-133.5	108.993	143.732
-133	109.176	143.692
-132.5	109.273	143.308
-132	109.326	143.417
-131.5	109.514	143.52
-131	109.376	143.631
-130.5	109.784	143.315
-130	110.454	143.312
-129.5	110.417	143.326
-129	110.514	143.466
-128.5	110.532	143.348
-128	110.399	143.393
-127.5	110.348	143.33
-127	110.604	143.279
-126.5	110.544	143.084
-126	111.01	143.23
-125.5	111.206	142.977
-125	110.995	143.198
-124.5	111.283	143.136
-124	111.312	142.86
-123.5	111.804	143.06
-123	111.816	143.116
-122.5	111.978	142.961
-122	111.853	142.743
-121.5	112.16	142.099
-121	112.132	141.932
-120.5	112.227	141.778
-120	112.072	141.642
-119.5	112.268	141.685
-119	112.448	141.733
-118.5	112.586	141.34
-118	112.862	141.871
-117.5	113.092	141.696
-117	113.016	141.753
-116.5	113.538	141.68
-116	114.216	141.977
-115.5	114.037	141.774
-115	114.656	141.757
-114.5	114.376	141.628
-114	114.61	141.674
-113.5	114.532	141.696
-113	114.576	141.635
-112.5	114.446	141.571
-112	114.617	141.533
-111.5	114.811	141.689
-111	114.532	141.757
-110.5	114.567	141.624
-110	114.762	141.653
-109.5	114.767	141.583
-109	114.448	141.671
-108.5	115.102	141.424
-108	114.758	141.41
-107.5	114.8	141.412
-107	114.978	141.601
-106.5	115.027	141.513
-106	115.085	141.549
-105.5	114.79	141.649
-105	115.062	141.613
-104.5	114.803	141.644
-104	115.205	141.588
-103.5	115.187	141.653
-103	114.97	141.676
-102.5	115.195	141.626
-102	115.143	141.422
-101.5	115.235	141.762
-101	115.095	141.758
-100.5	115.065	141.605
-100	115.212	141.687
-99.5	115.326	141.563
-99	115.349	141.78
-98.5	115.112	141.814
-98	114.911	141.701
-97.5	114.978	141.544
-97	115.07	141.512
-96.5	114.841	141.533
-96	115.245	141.522
-95.5	115.042	141.512
-95	114.942	141.66
-94.5	115.021	141.494
-94	115.052	141.397
-93.5	115.055	141.24
-93	114.954	141.39
-92.5	115.145	141.712
-92	115.003	141.46
-91.5	115.045	141.597
-91	114.869	141.555
-90.5	114.86	141.587
-90	115.111	141.501
-89.5	114.8	141.385
-89	115.063	141.454
-88.5	114.896	141.397
-88	114.998	141.597
-87.5	114.857	141.287
-87	114.949	141.158
-86.5	115.076	141.312
-86	115.073	141.36
-85.5	114.942	141.201
-85	114.817	141.426
-84.5	114.726	141.365
-84	114.795	141.376
-83.5	114.79	141.18
-83	114.732	141.089
-82.5	114.78	141.151
-82	114.514	141.385
-81.5	114.751	141.144
-81	114.478	141.052
-80.5	114.752	141.119
-80	114.56	141.167
-79.5	114.62	141.178
-79	114.584	141.203
-78.5	114.627	140.986
-78	114.465	140.708
-77.5	114.456	140.845
-77	114.426	140.872
-76.5	114.627	141.066
-76	114.282	140.824
-75.5	114.246	140.988
-75	114.594	140.753
-74.5	114.438	140.582
-74	114.515	140.859
-73.5	114.409	140.794
-73	114.554	141.032
-72.5	114.466	140.723
-72	114.659	140.817
-71.5	114.56	140.778
-71	114.435	140.724
-70.5	114.449	140.623
-70	114.421	140.899
-69.5	114.676	140.824
-69	114.489	140.781
-68.5	114.299	140.755
-68	114.335	140.742
-67.5	114.451	140.668
-67	114.596	140.336
-66.5	114.619	140.542
-66	114.677	140.785
-65.5	114.487	140.893
-65	114.571	140.474
-64.5	114.685	140.522
-64	114.502	140.538
-63.5	114.342	140.62
-63	114.421	140.795
-62.5	114.468	140.623
-62	114.548	140.561
-61.5	114.777	140.779
-61	114.603	140.324
-60.5	114.554	140.503
-60	114.577	140.294
-59.5	114.637	140.354
-59	114.571	140.446
-58.5	114.419	140.558
-58	114.58	140.538
-57.5	114.507	140.216
-57	114.431	140.382
-56.5	114.764	140.386
-56	114.644	140.359
-55.5	114.827	140.228
-55	114.604	140.256
-54.5	114.553	140.241
-54	114.769	140.087
-53.5	114.598	140.304
-53	114.666	140.255
-52.5	114.542	140.179
-52	114.505	140.299
-51.5	114.55	140.145
-51	114.676	140
-50.5	114.548	140.073
-50	114.418	139.961
-49.5	114.416	140.048
-49	114.54	140.111
-48.5	114.596	140.136
-48	114.627	140.166
-47.5	114.613	139.908
-47	114.607	140.028
-46.5	114.508	140.196
-46	114.329	140.034
-45.5	114.624	139.847
-45	114.571	139.979
-44.5	114.781	140.122
-44	114.577	139.937
-43.5	114.504	139.779
-43	114.764	140.058
-42.5	114.509	139.998
-42	114.502	139.871
-41.5	114.626	140.108
-41	114.9	139.783
-40.5	114.791	140.009
-40	114.818	139.894
-39.5	114.711	139.967
-39	114.673	139.818
-38.5	114.928	139.737
-38	114.757	140.032
-37.5	114.619	140.074
-37	114.675	139.598
-36.5	114.765	139.891
-36	114.665	139.94
-35.5	114.703	139.676
-35	114.899	139.79
-34.5	114.882	139.654
-34	114.817	139.982
-33.5	114.688	140.099
-33	114.962	139.824
-32.5	114.61	139.7
-32	114.633	139.79
-31.5	114.761	139.884
-31	114.798	139.714
-30.5	114.81	139.744
-30	114.653	139.72
-29.5	114.877	139.526
-29	114.673	139.693
-28.5	115	139.69
-28	114.908	139.884
-27.5	114.823	139.787
-27	115.127	139.401
-26.5	114.944	139.686
-26	114.903	139.584
-25.5	114.734	139.783
-25	114.929	139.561
-24.5	114.87	139.285
-24	115.143	139.776
-23.5	114.952	139.594
-23	114.709	139.609
-22.5	114.892	139.637
-22	114.882	139.616
-21.5	114.798	139.466
-21	114.755	139.725
-20.5	114.719	139.503
-20	115.094	139.639
-19.5	115.01	139.417
-19	115.073	139.257
-18.5	114.834	139.538
-18	114.872	139.434
-17.5	114.965	139.484
-17	115.073	139.577
-16.5	114.66	139.866
-16	114.784	139.57
-15.5	114.919	139.683
-15	114.926	139.38
-14.5	114.864	139.568
-14	115.183	139.519
-13.5	114.862	139.427
-13	115.085	139.536
-12.5	115.15	139.603
-12	115.037	139.552
-11.5	115.108	139.406
-11	115.205	139.484
-10.5	115.045	139.501
-10	115.202	139.572
-9.5	115.164	139.252
-9	115.122	139.459
-8.5	115.179	139.053
-8	115.345	139.331
-7.5	115.045	139.245
-7	115.182	139.341
-6.5	115.12	139.503
-6	115.252	139.552
-5.5	114.889	139.471
-5	115.209	139.531
-4.5	115.34	139.464
-4	115.086	139.31
-3.5	115.343	139.404
-3	115.275	139.327
-2.5	115.056	139.566
-2	115.369	139.543
-1.5	115.107	139.503
-1	115.151	139.368
-0.5	114.843	139.371
0	114.788	139.471
0.5	114.277	139.556
1	113.793	139.288
1.5	112.403	139.243
2	110.389	139.297
2.5	107.66	139.396
3	104.483	139.36
3.5	101.605	139.345
4	99.695	139.304
4.5	98.66	139.241
5	98.094	139.288
5.5	97.722	139.192
6	97.402	139.44
6.5	97.539	139.171
7	97.446	139.573
7.5	97.364	139.164
8	97.301	138.931
8.5	97.012	139.353
9	96.949	139.18
9.5	96.609	139.104
10	96.407	139.199
10.5	96.351	138.829
11	96.088	139.194
11.5	96.189	139.436
12	95.845	138.964
12.5	95.549	139.051
13	95.335	139.09
13.5	95.176	138.994
14	95.185	139.129
14.5	94.862	138.752
15	94.534	138.75
15.5	94.456	139.15
16	94.388	138.913
16.5	94.368	139.027
17	93.8	138.89
17.5	93.69	139.057
18	93.653	138.932
18.5	93.512	138.757
19	93.284	139.001
19.5	93.429	138.696
20	93.142	138.896
20.5	92.853	138.796
21	92.892	139.034
21.5	92.791	138.908
22	92.687	138.761
22.5	92.297	138.866
23	92.18	139.044
23.5	92.17	138.773
24	92.226	138.685
24.5	92.172	138.939
25	91.771	139.183
25.5	91.803	138.848
26	91.728	138.882
26.5	91.567	139.018
27	91.498	138.853
27.5	91.52	138.757
28	91.251	138.957
28.5	91.421	138.892
29	91.427	138.687
29.5	91.378	139.195
30	91.235	138.705
30.5	91.249	138.748
31	91.098	138.885
31.5	91.2	138.733
32	91.134	138.836
32.5	91.284	138.745
33	90.982	139.029
33.5	91.075	138.75
34	90.912	138.936
34.5	90.849	138.841
35	91.12	138.831
35.5	90.821	138.792
36	90.753	138.883
36.5	90.854	138.74
37	90.753	138.871
37.5	90.803	138.644
38	90.565	138.692
38.5	90.894	138.553
39	90.775	138.915
39.5	90.719	138.651
40	90.752	138.736
40.5	90.607	138.589
41	90.539	138.768
41.5	90.659	138.769
42	90.595	138.675
42.5	90.633	138.575
43	90.374	138.647
43.5	90.565	138.614
44	90.457	138.745
44.5	90.434	138.368
45	90.455	138.518
45.5	90.533	138.827
46	90.609	138.542
46.5	90.612	138.806
47	90.585	138.486
47.5	90.454	138.507
48	90.518	138.68
48.5	90.478	138.493
49	90.57	138.745
49.5	90.499	138.652
50	90.526	138.425
50.5	90.427	138.45
51	90.579	138.481
51.5	90.576	138.572
52	90.561	138.293
52.5	90.448	138.439
53	90.406	138.483
53.5	90.465	138.736
54	90.347	138.451
54.5	90.484	138.514
55	90.613	138.521
55.5	90.365	138.526
56	90.37	138.261
56.5	90.45	138.525
57	90.507	138.361
57.5	90.466	138.087
58	90.439	137.264
58.5	90.403	135.413
59	90.357	132.189
59.5	90.347	126.981
60	90.531	120.618
60.5	90.548	113.475
61	90.473	105.662
61.5	90.396	97.853
62	90.13	90.49
62.5	89.519	83.484
63	88.29	77.721
63.5	86.348	72.772
64	83.723	68.455
64.5	80.193	65.041
65	76.012	62.234
65.5	71.228	59.785
66	65.762	57.906
66.5	60.308	56.152
67	54.726	54.79
67.5	49.55	53.512
68	44.912	52.446
68.5	40.499	51.459
69	36.559	50.557
69.5	33.273	49.836
70	30.31	49.092
70.5	27.656	48.417
71	25.414	47.795
71.5	23.533	47.322
72	21.932	46.749
72.5	20.473	46.184
73	19.313	45.82
73.5	18.263	45.25
74	17.372	44.907
74.5	16.575	44.498
75	15.902	44.203
75.5	15.233	43.761
76	14.73	43.463
76.5	14.225	43.146
77	13.774	42.78
77.5	13.353	42.577
78	12.942	42.249
78.5	12.597	41.926
79	12.273	41.68
79.5	11.968	41.488
80	11.66	41.197
80.5	11.372	41.049
81	11.18	40.727
81.5	10.896	40.572
82	10.692	40.331
82.5	10.489	40.175
83	10.27	40.047
83.5	10.128	39.783
84	9.955	39.622
84.5	9.799	39.497
85	9.618	39.23
85.5	9.49	39.254
86	9.356	38.972
86.5	9.226	38.86
87	9.104	38.602
87.5	8.991	38.444
88	8.887	38.44
88.5	8.78	38.137
89	8.681	38.011
89.5	8.562	37.823
90	8.498	37.713
90.5	8.429	37.661
91	8.318	37.398
91.5	8.255	37.313
92	8.138	37.242
92.5	8.068	37.069
93	7.959	36.852
93.5	7.909	36.839
94	7.78	36.699
94.5	7.742	36.492
95	7.652	36.422
95.5	7.579	36.252
96	7.489	36.173
96.5	7.447	36.133
97	7.386	35.992
97.5	7.303	35.8
98	7.265	35.691
98.5	7.191	35.661
99	7.148	35.498
99.5	7.088	35.372
100	7.015	35.386
100.5	6.956	35.148
101	6.897	35.087
101.5	6.832	35.01
102	6.834	34.93
102.5	6.776	34.868
103	6.698	34.696
103.5	6.636	34.647
104	6.624	34.604
104.5	6.575	34.467
105	6.508	34.4
105.5	6.446	34.269
106	6.426	34.24
106.5	6.397	34.135
107	6.319	34.08
107.5	6.305	33.982
108	6.277	33.888
108.5	6.235	33.797
109	6.203	33.778
109.5	6.143	33.564
110	6.124	33.566
110.5	6.068	33.547
111	6.027	33.428
111.5	5.969	33.382
112	5.948	33.144
112.5	5.927	33.213
113	5.917	33.061
113.5	5.863	33.064
114	5.83	32.919
114.5	5.793	32.915
115	5.779	32.803
115.5	5.729	32.783
116	5.672	32.677
116.5	5.644	32.651
117	5.629	32.538
117.5	5.611	32.525
118	5.539	32.419
118.5	5.552	32.335
119	5.494	32.292
119.5	5.444	32.252
120	5.432	32.129
120.5	5.406	32.149
121	5.352	32.015
121.5	5.362	31.994
122	5.328	31.909
122.5	5.282	31.906
123	5.259	31.832
123.5	5.244	31.745
124	5.209	31.664
124.5	5.182	31.701
125	5.146	31.593
125.5	5.14	31.505
126	5.129	31.537
126.5	5.082	31.43
127	5.055	31.395
127.5	5.058	31.391
128	5.007	31.323
128.5	5.014	31.291
129	4.985	31.228
129.5	4.957	31.18
130	4.958	31.143
130.5	4.918	31.054
131	4.916	31.046
131.5	4.922	31.065
132	4.862	30.971
132.5	4.838	30.937
133	4.816	30.861
133.5	4.79	30.795
134	4.764	30.8
134.5	4.777	30.732
135	4.735	30.734
135.5	4.723	30.631
136	4.725	30.665
136.5	4.665	30.536
137	4.666	30.529
137.5	4.657	30.479
138	4.62	30.483
138.5	4.632	30.389
139	4.599	30.411
139.5	4.598	30.327
140	4.581	30.291
140.5	4.56	30.279
141	4.553	30.277
141.5	4.512	30.204
142	4.521	30.164
142.5	4.49	30.151
143	4.452	30.081
143.5	4.465	30.092
144	4.427	30.063
144.5	4.4	30.069
145	4.401	30.042
145.5	4.383	30.02
146	4.398	29.94
146.5	4.381	29.965
147	4.349	29.895
147.5	4.308	29.967
148	4.324	29.851
148.5	4.314	29.839
149	4.311	29.806
149.5	4.307	29.794
150	4.268	29.75
150.5	4.306	29.647
151	4.285	29.657
151.5	4.248	29.647
152	4.236	29.583
152.5	4.24	29.617
153	4.232	29.554
153.5	4.201	29.526
154	4.204	29.473
154.5	4.168	29.385
155	4.164	29.417
155.5	4.158	29.367
156	4.115	29.38
156.5	4.128	29.372
157	4.111	29.368
157.5	4.098	29.326
158	4.097	29.26
158.5	4.05	29.232
159	4.061	29.205
159.5	4.043	29.139
160	4.046	29.099
160.5	4.021	29.068
161	4.006	29.009
161.5	4.018	29.008
162	3.975	29
162.5	3.988	28.978
163	3.946	28.987
163.5	3.96	28.991
164	3.964	28.945
164.5	3.963	28.905
165	3.913	28.872
165.5	3.911	28.842
166	3.903	28.851
166.5	3.905	28.826
167	3.892	28.789
167.5	3.847	28.774
168	3.857	28.793
168.5	3.84	28.656
169	3.828	28.717
169.5	3.849	28.642
170	3.825	28.613
170.5	3.794	28.607
171	3.798	28.584
171.5	3.798	28.523
172	3.806	28.51
172.5	3.772	28.495
173	3.756	28.465
173.5	3.75	28.427
174	3.751	28.379
174.5	3.737	28.395
175	3.749	28.368
175.5	3.709	28.321
176	3.713	28.299
176.5	3.7	28.271
177	3.68	28.297
177.5	3.678	28.246
178	3.672	28.235
178.5	3.661	28.371
179	3.649	29.15
179.5	3.63	31.335
180	3.626	35.118
180.5	3.616	40.901
181	3.616	48.026
181.5	3.606	56.04
182	3.609	64.648
182.5	3.638	72.668
183	3.719	80.614
183.5	4.01	87.39
184	4.499	93.491
184.5	5.479	98.368
185	7.009	102.573
185.5	9.313	106.089
186	12.582	108.879
186.5	16.753	111.274
187	21.656	113.001
187.5	27.165	114.564
188	33.305	115.809
188.5	39.747	117.28
189	46.031	117.92
189.5	52.109	118.666
190	57.415	119.309
190.5	62.197	120.098
191	66.408	120.815
191.5	70.095	121.196
192	73.086	121.57
192.5	75.732	122.135
193	78.068	122.62
193.5	80.222	122.813
194	81.91	123.197
194.5	83.5	123.7
195	84.504	123.82
195.5	85.546	124.285
196	86.635	124.496
196.5	87.494	124.762
197	88.415	124.931
197.5	89.257	125.176
198	90.076	125.343
198.5	90.898	125.66
199	91.576	125.969
199.5	92.062	126.286
200	92.529	126.483
200.5	93.151	126.5
201	93.443	126.581
201.5	94.004	126.669
202	94.315	127.139
202.5	94.594	127.116
203	95.131	127.268
203.5	95.425	127.459
204	95.436	127.951
204.5	96.053	127.903
205	96.156	127.686
205.5	96.331	128.094
206	96.638	128.207
206.5	96.665	128.383
207	96.816	128.421
207.5	97.193	128.56
208	97.442	128.439
208.5	97.597	128.631
209	97.694	128.791
209.5	97.939	129.14
210	98.031	128.889
210.5	98.165	129.151
211	98.48	129.515
211.5	98.538	129.164
212	98.767	129.458
212.5	98.892	129.385
213	98.821	129.493
213.5	98.998	129.317
214	99.017	129.716
214.5	99.267	129.687
215	99.38	129.948
215.5	99.566	130.037
216	99.509	129.977
216.5	99.726	129.953
217	99.739	129.988
217.5	99.642	130.332
218	99.864	130.368
218.5	100.079	130.373
219	100.085	130.509
219.5	100.033	130.537
220	100.145	130.501
220.5	100.341	130.988
221	100.446	130.89
221.5	100.471	130.767
222	100.626	130.948
222.5	100.511	130.81
223	100.794	131.078
223.5	100.766	130.835
224	100.633	130.872
224.5	100.907	131.131
225	100.774	131.427
225.5	100.787	131.248
226	100.888	131.346
226.5	101.069	131.453
227	101.212	131.496
227.5	101.145	131.428
228	101.369	131.681
228.5	101.34	131.63
229	101.145	131.743
229.5	101.307	131.766
230	101.574	131.685
230.5	101.411	131.807
231	101.67	131.864
231.5	101.633	132.025
232	101.867	131.963
232.5	101.771	132.096
233	101.841	131.826
233.5	101.866	132.001
234	101.837	132.218
234.5	101.964	131.995
235	101.875	132.211
235.5	102.039	132.316
236	102.097	132.213
236.5	102.097	132.389
237	102.03	132.436
237.5	102.476	132.236
238	102.342	132.276
238.5	102.471	132.204
239	102.489	132.386
239.5	102.57	132.487
240	102.585	132.424
240.5	102.329	132.701
241	102.38	132.726
241.5	102.556	132.963
242	102.525	132.916
242.5	102.58	132.662
243	102.623	132.681
243.5	102.384	132.651
244	102.746	132.937
244.5	102.562	132.883
245	102.652	132.965
245.5	102.638	133
246	102.892	132.833
246.5	103.011	132.86
247	102.811	133.104
247.5	102.863	132.896
248	102.963	132.945
248.5	103.255	132.888
249	102.788	133.096
249.5	103.098	132.916
250	103.098	132.982
250.5	103.058	133.069
251	103.163	133.156
251.5	103.06	133.243
252	102.994	133.265
252.5	102.868	133.163
253	102.971	133.433
253.5	103.129	133.307
254	103.175	133.119
254.5	103.162	133.151
255	103.104	133.292
255.5	103.153	133.349
256	103.097	133.209
256.5	103.2	133.27
257	103.422	133.344
257.5	103.029	133.258
258	103.363	133.298
258.5	103.413	133.436
259	103.279	133.513
259.5	103.235	133.624
260	103.429	133.288
260.5	103.288	133.599
261	103.289	133.277
261.5	103.464	133.835
262	103.571	133.537
262.5	103.247	133.409
263	103.407	133.693
263.5	103.276	133.466
264	103.411	133.303
264.5	103.394	133.734
265	103.497	133.666
265.5	103.544	133.688
266	103.517	133.697
266.5	103.451	133.771
267	103.417	133.581
267.5	103.244	133.503
268	103.327	133.697
268.5	103.5	133.633
269	103.426	133.683
269.5	103.313	133.702
270	103.731	133.954
270.5	103.58	133.831
271	103.692	133.722
271.5	103.632	133.754
272	103.583	134.052
272.5	103.455	133.737
273	103.586	133.939
273.5	103.659	133.756
274	103.485	133.801
274.5	103.727	133.904
275	103.592	133.857
275.5	103.569	133.964
276	103.605	134.061
276.5	103.419	134.034
277	103.322	133.909
277.5	103.461	134.121
278	103.595	134.056
278.5	103.435	133.803
279	103.598	134.012
279.5	103.674	133.777
280	103.469	133.932
280.5	103.556	134.034
281	103.439	134.137
281.5	103.497	133.961
282	103.592	133.806
282.5	103.703	133.885
283	103.727	133.937
283.5	103.437	133.973
284	103.772	134.145
284.5	103.703	134.074
285	103.487	133.958
285.5	103.658	133.764
286	103.684	134.034
286.5	103.648	134.142
287	103.579	134.243
287.5	103.368	134.003
288	103.432	134.072
288.5	103.331	133.99
289	103.421	133.966
289.5	103.435	133.951
290	103.371	134.219
290.5	103.362	134.165
291	103.38	134.105
291.5	103.536	133.993
292	103.377	134.045
292.5	103.479	133.97
293	103.256	134.115
293.5	103.63	134.165
294	103.553	133.97
294.5	103.444	134.037
295	103.306	134.229
295.5	103.333	134.263
296	103.549	133.921
296.5	103.429	134.066
297	103.314	134.118
297.5	103.433	133.875
298	103.389	134.088
298.5	103.433	134.214
299	103.322	134.106
299.5	103.311	134.251
300	103.363	134.079
300.5	103.226	134.292
301	103.351	134.387
301.5	103.18	134.035
302	103.264	133.998
302.5	103.132	134.081
303	103.375	134.039
303.5	103.084	134.416
304	103.35	134.138
304.5	103.226	134.132
305	103.185	134.404
305.5	103.248	134.05
306	103.087	134.209
306.5	102.958	134.267
307	103.037	134.25
307.5	103.306	134.253
308	103.129	134.219
308.5	103.302	134.378
309	103.406	134.208
309.5	104.106	134.312
310	105.233	134.067
310.5	107.66	134.607
311	110.132	134.343
311.5	113.047	134.137
312	116.493	134.113
312.5	119.477	133.921
313	122.402	133.948
313.5	124.423	134.13
314	125.924	134.015
314.5	127.052	134.077
315	127.586	134.204
315.5	127.684	133.873
316	127.996	134.118
316.5	128.235	134.091
317	128.283	134.045
317.5	128.24	134.04
318	128.354	133.905
318.5	128.467	134.226
319	128.377	134.208
319.5	128.506	133.919
320	128.708	134.062
320.5	128.736	133.971
321	128.64	134.196
321.5	128.728	134.103
322	128.699	134.253
322.5	129.024	134.307
323	128.901	134.111
323.5	128.885	134.083
324	129.05	133.997
324.5	128.749	134.138
325	129.127	134.219
325.5	128.895	134.192
326	128.932	134.175
326.5	128.921	134.29
327	129.156	134.16
327.5	129.244	134.204
328	129.206	134.201
328.5	128.934	134.201
329	128.961	133.991
329.5	129.067	134.04
330	128.684	134.382
330.5	128.89	134.209
331	129.055	134.224
331.5	128.775	134.155
332	128.588	134.072
332.5	128.724	134.373
333	129	134.284
333.5	128.851	134.309
334	128.788	134.128
334.5	128.827	134.099
335	128.838	134.077
335.5	128.848	134.304
336	128.752	134.159
336.5	129	133.882
337	129.093	134.01
337.5	129.53	134.282
338	129.917	134.219
338.5	130.319	134.132
339	130.762	134.113
339.5	130.608	134.184
340	131	134.189
340.5	131.08	134.126
341	131.35	134.235
341.5	131.674	134.331
342	131.955	134.299
342.5	132.198	134.427
343	132.213	134.223
343.5	132.545	134.228
344	132.898	134.074
344.5	132.841	134.01
345	133.122	134.169
345.5	133.389	134.064
346	132.966	134.334
346.5	133.337	134.235
347	133.463	134.165
347.5	133.594	134.206
348	133.586	134.24
348.5	133.668	134.191
349	133.724	134.238
349.5	133.876	134.394
350	133.884	134.074
350.5	133.722	134.285
351	133.81	134.361
351.5	134.073	134.089
352	133.844	134.331
352.5	133.955	134.101
353	133.984	134.341
353.5	133.631	134.282
354	134.018	134.4
354.5	133.803	134.449
355	133.795	134.206
355.5	133.756	134.312
356	134.045	134.064
356.5	133.864	134.187
357	133.797	134.399
357.5	134.168	134.147
358	133.781	134.032
358.5	133.78	134.155
359	133.982	134.263
359.5	134.085	134.465
360	133.901	134.189
360.5	133.63	134.243
361	133.91	134.064
361.5	133.839	134.177
362	133.85	134.344
362.5	134.324	134.253
363	133.977	134.336
363.5	134.045	134.029
364	134.018	134.275
364.5	134.149	134.202
365	134.033	134.229
365.5	133.942	134.192
366	134.07	134.387
366.5	133.857	134.312
367	133.955	134.167
367.5	133.776	133.401
368	133.837	131.759
368.5	133.797	128.473
369	133.884	123.826
369.5	133.847	117.511
370	133.736	110.475
370.5	133.883	102.798
371	133.867	94.958
371.5	133.673	87.458
372	133.243	80.574
372.5	132.048	74.743
373	130.558	69.719
373.5	128.304	65.387
374	125.145	61.815
374.5	121.314	59.103
375	116.377	56.688
375.5	111.003	54.704
376	105.311	53.305
376.5	99.163	51.863
377	93.497	50.69
377.5	87.792	49.676
378	82.484	48.825
378.5	77.535	47.952
379	72.927	47.184
379.5	68.897	46.695
380	65.373	45.993
380.5	62.222	45.409
381	59.464	44.941
381.5	57.186	44.418
382	55.057	43.989
382.5	53.383	43.485
383	51.848	43.158
383.5	50.582	42.817
384	49.374	42.414
384.5	48.155	42.031
385	47.266	41.784
385.5	46.534	41.436
386	45.646	41.104
386.5	45.067	40.837
387	44.418	40.543
387.5	43.673	40.383
388	43.205	39.995
388.5	42.609	39.829
389	42.019	39.569
389.5	41.604	39.377
390	41.143	39.223
390.5	40.755	39.054
391	40.344	38.74
391.5	40.025	38.618
392	39.686	38.473
392.5	39.318	38.212
393	39.01	38.084
393.5	38.778	37.837
394	38.447	37.651
394.5	38.174	37.45
395	37.991	37.331
395.5	37.558	37.166
396	37.394	37.079
396.5	37.172	36.855
397	36.978	36.769
397.5	36.958	36.616
398	36.607	36.46
398.5	36.418	36.357
399	36.192	36.201
399.5	36.058	36.039
400	35.919	36.028
400.5	35.678	35.889
401	35.521	35.775
401.5	35.354	35.687
402	35.222	35.463
402.5	35.089	35.323
403	34.911	35.249
403.5	34.865	35.148
404	34.687	35.064
404.5	34.607	34.982
405	34.399	34.811
405.5	34.326	34.778
406	34.202	34.68
406.5	34.049	34.565
407	33.979	34.479
407.5	33.809	34.441
408	33.764	34.345
408.5	33.623	34.214
409	33.452	34.14
409.5	33.431	34.042
410	33.256	34.038
410.5	33.231	33.932
411	33.102	33.894
411.5	32.981	33.726
412	32.982	33.64
412.5	32.896	33.575
413	32.604	33.515
413.5	32.67	33.42
414	32.499	33.35
414.5	32.481	33.259
415	32.375	33.282
415.5	32.361	33.211
416	32.348	33.112
416.5	32.183	33.04
417	32.239	32.963
417.5	32.015	32.909
418	31.991	32.834
418.5	31.863	32.773
419	31.795	32.815
419.5	31.819	32.741
420	31.655	32.73
420.5	31.651	32.618
421	31.559	32.492
421.5	31.539	32.438
422	31.427	32.488
422.5	31.396	32.361
423	31.37	32.363
423.5	31.339	32.331
424	31.263	32.139
424.5	31.26	32.164
425	31.129	32.19
425.5	31.123	32.099
426	30.983	32.032
426.5	31.002	32.065
427	31.029	31.95
427.5	30.906	31.988
428	30.784	31.898
428.5	30.854	31.861
429	30.805	31.891
429.5	30.727	31.799
430	30.724	31.728
430.5	30.699	31.713
431	30.623	31.681
431.5	30.571	31.591
432	30.518	31.643
432.5	30.449	31.562
433	30.475	31.611
433.5	30.401	31.563
434	30.425	31.517
434.5	30.328	31.574
435	30.402	31.616
435.5	30.341	31.517
436	30.246	31.557
436.5	30.292	31.511
437	30.187	31.43
437.5	30.184	31.46
438	30.167	31.45
438.5	30.239	31.385
439	30.224	31.393
439.5	30.12	31.354
440	30.072	31.294
440.5	30.053	31.232
441	30.035	31.252
441.5	30.104	31.2
442	30.152	31.16
442.5	30.069	31.151
443	30.032	31.145
443.5	30.08	31.117
444	30.03	31.139
444.5	29.936	31.08
445	29.967	31.028
445.5	29.938	31.062
446	29.858	30.983
446.5	29.923	30.901
447	29.83	30.99
447.5	29.823	30.899
448	29.762	30.861
448.5	29.788	30.827
449	29.732	30.901
449.5	29.803	30.839
450	29.664	30.803
450.5	29.796	30.794
451	29.636	30.753
451.5	29.587	30.748
452	29.671	30.722
452.5	29.657	30.678
453	29.613	30.698
453.5	29.632	30.692
454	29.568	30.564
454.5	29.556	30.611
455	29.546	30.614
455.5	29.494	30.644
456	29.556	30.66
456.5	29.465	30.647
457	29.447	30.604
457.5	29.387	30.56
458	29.473	30.557
458.5	29.315	30.527
459	29.369	30.533
459.5	29.44	30.483
460	29.335	30.5
460.5	29.292	30.465
461	29.269	30.469
461.5	29.295	30.523
462	29.271	30.394
462.5	29.325	30.397
463	29.283	30.437
463.5	29.297	30.351
464	29.197	30.35
464.5	29.235	30.41
465	29.305	30.355
465.5	29.231	30.305
466	29.178	30.267
466.5	29.258	30.259
467	29.207	30.251
467.5	29.116	30.303
468	29.059	30.212
468.5	29.118	30.229
469	29.108	30.308
469.5	29.105	30.183
470	29.115	30.231
470.5	29.033	30.209
471	29.048	30.195
471.5	28.991	30.179
472	28.965	30.202
472.5	28.95	30.171
473	29.014	30.165
473.5	28.959	30.198
474	28.989	30.151
474.5	28.935	30.128
475	28.95	30.078
475.5	28.948	30.092
476	28.934	30.114
476.5	28.898	30.099
477	28.913	30.039
477.5	28.858	30.095
478	28.899	30.054
478.5	28.925	30.05
479	28.882	30.017
479.5	28.896	29.954
480	28.868	29.93
480.5	28.847	29.958
481	28.785	29.89
481.5	28.886	30.045
482	28.795	30.041
482.5	28.831	29.967
483	28.802	29.943
483.5	28.75	29.92
484	28.81	29.885
484.5	28.692	29.943
485	28.82	29.916
485.5	28.821	29.903
486	28.763	29.824
486.5	28.749	29.81
487	28.736	29.843
487.5	28.769	29.799
488	28.782	29.779
488.5	28.758	29.838
489	28.683	29.781
489.5	28.717	29.754
490	28.633	29.808
490.5	28.699	29.745
491	28.588	29.757
491.5	28.651	29.707
492	28.613	29.762
492.5	28.596	29.742
493	28.591	29.689
493.5	28.598	29.717
494	28.516	29.708
494.5	28.522	29.711
495	28.548	29.603
495.5	28.55	29.649
496	28.482	29.612
496.5	28.441	29.653
497	28.531	29.572
497.5	28.522	29.652
498	28.586	29.599
498.5	28.45	29.548
499	28.456	29.583
499.5	28.478	29.516
500	28.41	29.578
500.5	28.39	29.529
501	28.422	29.461
501.5	28.399	29.55
502	28.417	29.56
502.5	28.408	29.702
503	28.409	30.459
503.5	28.28	32.416
504	28.324	36.209
504.5	28.303	41.921
505	28.289	49.201
505.5	28.267	57.463
506	28.341	65.758
506.5	28.343	74.132
507	28.603	81.854
507.5	29.096	88.733
508	30.254	94.682
508.5	32.15	99.566
509	34.934	103.632
509.5	38.846	106.993
510	43.58	109.622
510.5	49.051	111.519
511	54.946	113.298
511.5	61.306	114.867
512	67.522	115.936
512.5	73.906	116.878
513	79.721	117.811
513.5	85.239	118.706
514	90.227	119.367
514.5	94.839	119.848
515	98.958	120.386
515.5	102.067	120.985
516	105.237	121.675
516.5	107.802	121.678
517	109.845	122.016
517.5	111.875	122.714
518	113.532	122.97
518.5	114.813	123.151
519	116.092	123.818
519.5	116.996	123.773
520	118.056	124.1
520.5	119.049	124.223
521	119.783	124.856
521.5	120.034	124.928
522	120.928	125.288
522.5	121.348	125.548
523	121.72	125.532
523.5	122.556	125.666
524	122.753	125.99
524.5	123.193	126.261
525	123.751	126.013
525.5	124.074	126.432
526	124.136	126.686
526.5	124.686	126.806
527	124.818	126.892
527.5	125.403	126.936
528	125.258	127.342
528.5	125.674	127.47
529	125.747	127.486
529.5	126.257	127.568
530	126.54	127.9
530.5	126.654	127.766
531	126.779	128.097
531.5	127.298	127.998
532	126.996	128.133
532.5	127.274	128.283
533	127.773	128.489
533.5	127.763	128.741
534	127.887	128.63
534.5	128.123	128.756
535	128.449	128.843
535.5	128.228	129.111
536	128.346	129.059
536.5	128.631	129.138
537	128.998	129.559
537.5	128.724	129.367
538	128.96	129.6
538.5	128.851	129.333
539	129.063	129.675
539.5	129.493	129.657
540	129.684	129.957
540.5	129.57	129.801
541	129.556	130.039
541.5	129.486	129.99
542	129.63	130.034
542.5	129.868	130.095
543	129.901	130.154
543.5	130.299	130.365
544	130.094	130.46
544.5	130.424	130.15
545	129.929	130.38
545.5	130.315	130.419
546	130.411	130.47
546.5	130.627	130.887
547	130.65	130.57
547.5	130.696	130.693
548	130.72	130.719
548.5	130.914	130.927
549	130.817	130.833
549.5	130.911	130.94
550	130.828	130.983
550.5	130.973	130.747
551	131.35	130.943
551.5	131.199	131.25
552	131.388	131.321
552.5	131.155	130.925
553	131.318	131.065
553.5	131.452	131.344
554	131.406	131.25
554.5	131.433	131.337
555	131.363	131.377
555.5	131.5	131.41
556	131.691	131.296
556.5	131.555	131.824
557	131.776	131.675
557.5	131.97	131.531
558	131.747	131.617
558.5	132.065	131.663
559	132.055	131.602
559.5	132.031	131.698
560	132.151	131.771
560.5	132.041	131.874
561	132.171	132.168
561.5	132.043	131.836
562	132.218	132.183
562.5	132.244	132.104
563	131.997	131.978
563.5	132.329	131.897
564	132.233	132.03
564.5	132.378	132.134
565	132.391	131.885
565.5	132.61	132.174
566	132.216	131.96
566.5	132.511	132.103
567	132.373	131.992
567.5	132.682	132.096
568	132.809	132.243
568.5	132.648	132.286
569	132.882	132.312
569.5	132.787	132.336
570	132.59	132.269
570.5	132.72	132.426
571	132.774	132.277
571.5	132.861	132.484
572	132.894	132.479
572.5	132.722	132.461
573	132.583	132.587
573.5	133.115	132.642
574	133.11	132.708
574.5	133.028	132.644
575	132.919	132.527
575.5	132.655	132.577
576	133.161	132.91
576.5	132.975	132.783
577	133.073	132.636
577.5	132.841	132.774
578	133.013	132.451
578.5	133.203	132.604
579	133.151	132.761
579.5	133.035	132.656
580	133.067	132.751
580.5	133.221	132.708
581	133.157	132.746
581.5	133.268	132.948
582	133.298	132.846
582.5	133.246	132.651
583	133.288	132.878
583.5	133.357	132.706
584	133.099	132.83
584.5	133.25	132.836
585	133.468	132.796
585.5	133.512	132.86
586	133.176	133.079
586.5	133.379	133.013
587	133.104	132.93
587.5	133.802	133.089
588	133.357	132.856
588.5	133.221	132.781
589	133.266	132.783
589.5	133.448	133.079
590	133.549	133.186
590.5	133.576	133.065
591	133.424	132.94
591.5	133.434	133.102
592	133.33	133.003
592.5	133.473	132.997
593	133.604	132.913
593.5	133.214	133.121
594	133.539	133.129
594.5	133.604	133.327
595	133.45	133.03
595.5	133.572	133.112
596	133.534	133.024
596.5	133.483	133.029
597	133.49	133.288
597.5	133.812	133.228
598	134.006	133.367
598.5	133.623	133.029
599	133.411	133.072
599.5	133.731	133.33
600	133.52	133.037
600.5	133.847	133.342
601	133.758	133.127
601.5	133.667	133.137

## Sheet: Fig. 8A
		Time, min	Lifetime, usec
		-30	28.5129
		-29.5	28.5214
		-29	28.5248
		-28.5	28.5192
		-28	28.5147
		-27.5	28.5195
		-27	28.5261
		-26.5	28.5179
		-26	28.531
		-25.5	28.5341
		-25	28.5302
		-24.5	28.537
		-24	28.5375
		-23.5	28.5435
		-23	28.5313
		-22.5	28.5476
		-22	28.5492
		-21.5	28.538
		-21	28.5602
		-20.5	28.5477
		-20	28.5464
		-19.5	28.5437
		-19	28.5446
		-18.5	28.5545
		-18	28.5456
		-17.5	28.574
		-17	28.567
		-16.5	28.5591
		-16	28.572
		-15.5	28.5555
		-15	28.5611
		-14.5	28.5582
		-14	28.5583
		-13.5	28.5567
		-13	28.5569
		-12.5	28.5646
		-12	28.5728
		-11.5	28.5853
		-11	28.5841
		-10.5	28.5696
		-10	28.579
		-9.5	28.5781
		-9	28.5773
		-8.5	28.5767
		-8	28.5997
		-7.5	28.5803
		-7	28.5834
		-6.5	28.5834
		-6	28.5788
		-5.5	28.5927
		-5	28.6039
		-4.5	28.6008
		-4	28.6065
		-3.5	28.6046
		-3	28.6163
		-2.5	28.6046
		-2	28.6077
		-1.5	28.6091
		-1	28.6232
		-0.5	28.5995
		0	28.6587
		0.5	28.7908
		1	29.0199
		1.5	29.3076
		2	29.5943
		2.5	29.8685
		3	30.0535
		3.5	30.2294
		4	30.3827
		4.5	30.4489
		5	30.5116
		5.5	30.5997
		6	30.607
		6.5	30.6319
		7	30.6566
		7.5	30.6776
		8	30.6803
		8.5	30.701
		9	30.7165
		9.5	30.7348
		10	30.7449
		10.5	30.7397
		11	30.7636
		11.5	30.752
		12	30.7781
		12.5	30.7798
		13	30.8168
		13.5	30.7867
		14	30.7959
		14.5	30.8076
		15	30.8234
		15.5	30.8061
		16	30.8222
		16.5	30.8199
		17	30.8287
		17.5	30.8299
		18	30.8438
		18.5	30.84
		19	30.8427
		19.5	30.8602
		20	30.8614
		20.5	30.8546
		21	30.8561
		21.5	30.868
		22	30.8658
		22.5	30.882
		23	30.8846
		23.5	30.8735
		24	30.8781
		24.5	30.8899
		25	30.8982
		25.5	30.8831
		26	30.8888
		26.5	30.9168
		27	30.8949
		27.5	30.8902
		28	30.903
		28.5	30.9089
		29	30.9306
		29.5	31.0349
		30	31.2611
		30.5	31.5788
		31	31.9782
		31.5	32.3461
		32	32.6733
		32.5	32.9178
		33	33.1022
		33.5	33.2265
		34	33.289
		34.5	33.375
		35	33.4118
		35.5	33.4367
		36	33.4741
		36.5	33.4965
		37	33.515
		37.5	33.5195
		38	33.5441
		38.5	33.5603
		39	33.5734
		39.5	33.5722
		40	33.606
		40.5	33.6107
		41	33.6071
		41.5	33.6217
		42	33.6339
		42.5	33.6348
		43	33.6531
		43.5	33.6433
		44	33.6512
		44.5	33.6636
		45	33.6525
		45.5	33.6889
		46	33.6833
		46.5	33.6844
		47	33.711
		47.5	33.7174
		48	33.7085
		48.5	33.7158
		49	33.7087
		49.5	33.7291
		50	33.7286
		50.5	33.7202
		51	33.7539
		51.5	33.7473
		52	33.7491
		52.5	33.7471
		53	33.7785
		53.5	33.7731
		54	33.7713
		54.5	33.7778
		55	33.7791
		55.5	33.7747
		56	33.7854
		56.5	33.7967
		57	33.7911
		57.5	33.7972
		58	33.7973
		58.5	33.8042
		59	33.815
		59.5	33.8508
		60	34.0425
		60.5	34.358
		61	34.8094
		61.5	35.3246
		62	35.8328
		62.5	36.3322
		63	36.7395
		63.5	37.0474
		64	37.3172
		64.5	37.5042
		65	37.67
		65.5	37.7653
		66	37.8552
		66.5	37.9203
		67	37.9816
		67.5	38.0135
		68	38.0639
		68.5	38.0997
		69	38.1396
		69.5	38.1562
		70	38.1931
		70.5	38.2098
		71	38.2375
		71.5	38.2411
		72	38.2714
		72.5	38.2813
		73	38.2956
		73.5	38.3356
		74	38.3422
		74.5	38.3601
		75	38.361
		75.5	38.3806
		76	38.3927
		76.5	38.4169
		77	38.4289
		77.5	38.4269
		78	38.4494
		78.5	38.4602
		79	38.4674
		79.5	38.4788
		80	38.5093
		80.5	38.4889
		81	38.4887
		81.5	38.5143
		82	38.519
		82.5	38.5374
		83	38.5452
		83.5	38.5463
		84	38.5421
		84.5	38.5513
		85	38.5745
		85.5	38.5971
		86	38.5872
		86.5	38.5953
		87	38.6105
		87.5	38.6258
		88	38.6322
		88.5	38.6236
		89	38.6171
		89.5	38.5836
		90	38.6099
		90.5	38.792
		91	39.0761
		91.5	39.4915
		92	39.9442
		92.5	40.3836
		93	40.8048
		93.5	41.1251
		94	41.3769
		94.5	41.5924
		95	41.7733
		95.5	41.8951
		96	41.9805
		96.5	42.0582
		97	42.136
		97.5	42.2188
		98	42.2598
		98.5	42.2974
		99	42.3294
		99.5	42.3425
		100	42.3914
		100.5	42.4091
		101	42.4569
		101.5	42.4442
		102	42.4829
		102.5	42.5177
		103	42.5146
		103.5	42.5473
		104	42.5604
		104.5	42.5726
		105	42.594
		105.5	42.6021
		106	42.635
		106.5	42.6341
		107	42.6566
		107.5	42.6633
		108	42.6752
		108.5	42.6861
		109	42.7276
		109.5	42.722
		110	42.7279
		110.5	42.7376
		111	42.7672
		111.5	42.7665
		112	42.7726
		112.5	42.791
		113	42.8051
		113.5	42.824
		114	42.8508
		114.5	42.8436
		115	42.8494
		115.5	42.8611
		116	42.8712
		116.5	42.8719
		117	42.9139
		117.5	42.8824
		118	42.8966
		118.5	42.9363
		119	42.9089
		119.5	43.0368
		120	43.3612
		120.5	43.911
		121	44.7012
		121.5	45.6765
		122	46.6863
		122.5	47.6435
		123	48.4491
		123.5	49.1277
		124	49.6447
		124.5	50.0374
		125	50.3324
		125.5	50.5931
		126	50.7327
		126.5	50.8948
		127	51.0203
		127.5	51.1188
		128	51.2194
		128.5	51.288
		129	51.371
		129.5	51.439
		130	51.5154
		130.5	51.5724
		131	51.6162
		131.5	51.6617
		132	51.7315
		132.5	51.8045
		133	51.8626
		133.5	51.8654
		134	51.8888
		134.5	51.938
		135	51.9815
		135.5	52.0002
		136	52.0876
		136.5	52.0911
		137	52.1226
		137.5	52.1708
		138	52.1932
		138.5	52.2259
		139	52.2679
		139.5	52.3067
		140	52.3441
		140.5	52.3275
		141	52.4007
		141.5	52.4087
		142	52.4425
		142.5	52.4582
		143	52.5246
		143.5	52.547
		144	52.555
		144.5	52.5901
		145	52.6275
		145.5	52.6114
		146	52.6519
		146.5	52.6816
		147	52.7136
		147.5	52.7418
		148	52.7701
		148.5	52.7855
		149	52.7142
		149.5	52.6941
		150	52.8806
		150.5	53.5661
		151	54.6743
		151.5	56.0953
		152	57.6763
		152.5	59.1966
		153	60.5205
		153.5	61.58
		154	62.3308
		154.5	62.88
		155	63.3675
		155.5	63.698
		156	63.938
		156.5	64.1462
		157	64.3426
		157.5	64.5298
		158	64.6058
		158.5	64.6826
		159	64.7958
		159.5	64.8584
		160	64.9755
		160.5	65.0307
		161	65.0817
		161.5	65.129
		162	65.172
		162.5	65.2344
		163	65.2711
		163.5	65.3445
		164	65.3981
		164.5	65.4264
		165	65.4568
		165.5	65.4957
		166	65.5214
		166.5	65.6033
		167	65.6337
		167.5	65.659
		168	65.6921
		168.5	65.7477
		169	65.768
		169.5	65.8002
		170	65.8031
		170.5	65.851
		171	65.8754
		171.5	65.9178
		172	65.9168
		172.5	66.0145
		173	66.0195
		173.5	66.071
		174	66.0936
		174.5	66.092
		175	66.0999
		175.5	66.1827
		176	66.1872
		176.5	66.2091
		177	66.2221
		177.5	66.2866
		178	66.3243
		178.5	66.3349
		179	66.3532
		179.5	66.3725
		180	66.3945

## Sheet: Fig. 8B
		O2, mm Hg		lifetime, us
		142	2.9321e-05	29.321
		106.5	3.1592e-05	31.592
		67	3.4479e-05	34.479
		35	3.9096e-05	39.096
		21	4.309e-05	43.09
		7	5.1417e-05	51.417
		0	6.4355e-05	64.355

## Sheet: Fig 8C
		Slave	mmHg
		0	142.437
		0.5	142.499
		1	142.289
		1.5	142.359
		2	142.4
		2.5	142.381
		3	142.447
		3.5	142.585
		4	142.648
		4.5	142.763
		5	142.353
		5.5	142.582
		6	142.518
		6.5	142.596
		7	142.467
		7.5	142.51
		8	142.698
		8.5	142.579
		9	142.663
		9.5	142.611
		10	142.66
		10.5	142.616
		11	142.466
		11.5	142.567
		12	142.668
		12.5	142.624
		13	142.668
		13.5	142.641
		14	142.54
		14.5	142.341
		15	142.741
		15.5	142.607
		16	142.503
		16.5	142.552
		17	142.278
		17.5	142.58
		18	142.567
		18.5	142.575
		19	142.736
		19.5	142.68
		20	142.407
		20.5	142.639
		21	142.736
		21.5	142.545
		22	142.579
		22.5	142.518
		23	142.628
		23.5	142.54
		24	142.688
		24.5	142.594
		25	142.58
		25.5	142.639
		26	142.692
		26.5	142.567
		27	142.521
		27.5	142.486
		28	142.547
		28.5	142.695
		29	142.322
		29.5	142.45
		30	142.395
		30.5	142.837
		31	142.675
		31.5	142.81
		32	142.776
		32.5	142.498
		33	142.638
		33.5	142.638
		34	142.515
		34.5	142.531
		35	142.602
		35.5	142.56
		36	142.629
		36.5	142.425
		37	142.646
		37.5	142.589
		38	142.629
		38.5	142.45
		39	142.628
		39.5	142.552
		40	142.506
		40.5	142.663
		41	142.705
		41.5	142.734
		42	142.543
		42.5	142.366
		43	142.467
		43.5	142.032
		44	141.703
		44.5	141.073
		45	139.848
		45.5	138.72
		46	136.596
		46.5	134.802
		47	132.776
		47.5	130.626
		48	128.334
		48.5	126.494
		49	124.665
		49.5	122.527
		50	120.791
		50.5	119.337
		51	117.727
		51.5	116.738
		52	115.753
		52.5	114.608
		53	113.831
		53.5	113.239
		54	112.55
		54.5	112.262
		55	111.533
		55.5	111.307
		56	110.952
		56.5	110.817
		57	110.201
		57.5	109.94
		58	110.027
		58.5	109.589
		59	109.214
		59.5	109.371
		60	109.029
		60.5	109.037
		61	108.666
		61.5	108.59
		62	108.541
		62.5	108.565
		63	108.492
		63.5	108.398
		64	108.049
		64.5	108.11
		65	108.056
		65.5	107.779
		66	108.024
		66.5	107.875
		67	107.506
		67.5	107.612
		68	107.371
		68.5	107.443
		69	107.276
		69.5	107.521
		70	107.405
		70.5	107.344
		71	107.361
		71.5	107.052
		72	107.19
		72.5	107.285
		73	107.064
		73.5	107.099
		74	107.246
		74.5	106.976
		75	107.059
		75.5	106.84
		76	106.806
		76.5	106.814
		77	106.91
		77.5	106.98
		78	106.497
		78.5	106.678
		79	106.56
		79.5	107.05
		80	106.951
		80.5	106.75
		81	106.953
		81.5	107.362
		82	108.034
		82.5	108.95
		83	110.172
		83.5	111.314
		84	113.25
		84.5	114.762
		85	116.617
		85.5	118.506
		86	120.354
		86.5	122.26
		87	123.842
		87.5	125.482
		88	127.062
		88.5	128.14
		89	129.486
		89.5	130.558
		90	131.629
		90.5	132.682
		91	133.415
		91.5	134.38
		92	135.153
		92.5	135.927
		93	136.244
		93.5	136.735
		94	137.139
		94.5	137.679
		95	137.863
		95.5	138.344
		96	138.9
		96.5	138.836
		97	139.254
		97.5	139.492
		98	139.469
		98.5	139.742
		99	140.05
		99.5	139.964
		100	140.167
		100.5	140.228
		101	140.261
		101.5	140.529
		102	140.663
		102.5	140.504
		103	140.513
		103.5	141.03
		104	140.965
		104.5	140.921
		105	141.02
		105.5	141.056
		106	140.912
		106.5	141.062
		107	141.116
		107.5	141.24
		108	141.067
		108.5	141.471
		109	141.442
		109.5	141.56
		110	141.444
		110.5	141.472
		111	141.643
		111.5	141.503
		112	141.584
		112.5	141.41
		113	141.354
		113.5	141.585
		114	141.72
		114.5	141.614
		115	141.673
		115.5	141.842
		116	141.702
		116.5	141.843
		117	141.877
		117.5	141.865
		118	141.778
		118.5	141.695
		119	141.779
		119.5	141.799
		120	141.826
		120.5	142
		121	142.118
		121.5	141.983
		122	141.806
		122.5	141.965
		123	142.025
		123.5	141.928
		124	142.076
		124.5	142.031
		125	141.894
		125.5	142.177
		126	142.331
		126.5	142.063
		127	142.16
		127.5	142.012
		128	141.862
		128.5	142.284
		129	142.122
		129.5	142.226
		130	142.125
		130.5	141.825
		131	141.928
		131.5	142.167
		132	142.209
		132.5	141.845
		133	141.998
		133.5	142.122
		134	142.093
		134.5	141.918
		135	142.213
		135.5	142.096
		136	141.99
		136.5	142.319
		137	142.074
		137.5	141.891
		138	142.059
		138.5	142.066
		139	141.98
		139.5	142.017
		140	142.103
		140.5	141.961
		141	142.051
		141.5	142.036
		142	142.041
		142.5	142.15
		143	142.041
		143.5	142.196
		144	142.103
		144.5	142.069
		145	142.135
		145.5	142.169
		146	142.024
		146.5	142.073
		147	142.004
		147.5	142.157
		148	142.137
		148.5	142.017
		149	142.009
		149.5	142.133
		150	142.103
		150.5	142.093
		151	141.912
		151.5	141.943
		152	141.928
		152.5	141.958
		153	142.02
		153.5	142.078
		154	142.132
		154.5	142.113
		155	142.123
		155.5	142.041
		156	142.096
		156.5	142.174
		157	141.884
		157.5	142.039
		158	142.204
		158.5	142.009
		159	142.171
		159.5	142.034
		160	142.042
		160.5	142.024
		161	142.209
		161.5	142.228
		162	141.997
		162.5	142.251
		163	141.945
		163.5	142.186
		164	142.061
		164.5	142.187
		165	142.117
		165.5	141.891
		166	141.744
		166.5	141.499
		167	141.194
		167.5	140.966
		168	140.47
		168.5	140.28
		169	140.047
		169.5	140.017
		170	139.944
		170.5	139.676
		171	139.73
		171.5	139.622
		172	139.516
		172.5	139.543
		173	139.475
		173.5	139.539
		174	139.246
		174.5	139.216
		175	139.317
		175.5	139.295
		176	139.464
		176.5	139.307
		177	139.354
		177.5	139.367
		178	139.16
		178.5	139.308
		179	139.121
		179.5	139.239
		180	139.248
		180.5	139.229
		181	139.259
		181.5	139.27
		182	139.266
		182.5	139.295
		183	139.293
		183.5	139.101
		184	139.167
		184.5	139.236
		185	139.037
		185.5	139.13
		186	139.148
		186.5	139.015
		187	139.185
		187.5	139.013
		188	139.138
		188.5	139.145
		189	139.448
		189.5	139.189
		190	139.224
		190.5	139.128
		191	139.249
		191.5	139.214
		192	139.055
		192.5	139.059
		193	139.064
		193.5	139.214
		194	139.273
		194.5	138.915
		195	139.079
		195.5	139.067
		196	139.092
		196.5	139.145
		197	139.248
		197.5	139.151
		198	138.902
		198.5	139.015
		199	139.19
		199.5	139.189
		200	139.199
		200.5	139.329
		201	139.175
		201.5	139.244
		202	139.221
		202.5	139.113
		203	139.098
		203.5	139.232
		204	139.114
		204.5	139.246
		205	139.254
		205.5	139.025
		206	139.303
		206.5	138.941
		207	139.199
		207.5	139.172
		208	139.089
		208.5	139.084
		209	139.305
		209.5	139.052
		210	139.057
		210.5	139.13
		211	139.01
		211.5	138.993
		212	139.298
		212.5	138.993
		213	138.988
		213.5	139.065
		214	139.204
		214.5	139.182
		215	139.202
		215.5	139.285
		216	139.084
		216.5	138.875
		217	139.259
		217.5	139.109
		218	139.155
		218.5	139.19
		219	139.345
		219.5	139.106
		220	139.114
		220.5	139.546
		221	139.138
		221.5	139.516
		222	139.494
		222.5	139.617
		223	139.887
		223.5	139.814
		224	140.002
		224.5	140.45
		225	140.626
		225.5	140.695
		226	140.612
		226.5	140.685
		227	140.948
		227.5	141.081
		228	140.914
		228.5	141.272
		229	141.326
		229.5	140.929
		230	141.28
		230.5	141.408
		231	141.423
		231.5	141.589
		232	141.327
		232.5	141.565
		233	141.626
		233.5	141.489
		234	141.466
		234.5	141.904
		235	141.427
		235.5	141.675
		236	141.558
		236.5	141.671
		237	141.742
		237.5	141.644
		238	141.442
		238.5	141.715
		239	141.59
		239.5	141.659
		240	141.73
		240.5	141.508
		241	141.621
		241.5	141.643
		242	141.646
		242.5	141.875
		243	141.875
		243.5	141.698
		244	141.592
		244.5	141.641
		245	141.577
		245.5	141.572
		246	141.604
		246.5	141.681
		247	141.799
		247.5	141.826
		248	141.671
		248.5	141.548
		249	141.526
		249.5	141.683
		250	141.761
		250.5	141.629
		251	141.641
		251.5	141.43
		252	141.587
		252.5	141.779
		253	141.656
		253.5	141.514
		254	141.636
		254.5	141.519
		255	141.7
		255.5	141.698
		256	141.921
		256.5	141.805
		257	141.545
		257.5	141.764
		258	141.713
		258.5	141.798
		259	141.759
		259.5	141.663
		260	141.783
		260.5	141.801
		261	141.683
		261.5	141.752
		262	141.616
		262.5	141.715
		263	141.798
		263.5	141.609
		264	141.712
		264.5	141.678
		265	141.53
		265.5	141.653
		266	141.631
		266.5	141.552
		267	141.713
		267.5	141.326
		268	141.864
		268.5	141.56
		269	141.503
		269.5	141.565
		270	141.693
		270.5	141.86
		271	141.609
		271.5	141.573
		272	141.548
		272.5	141.369
		273	141.848
		273.5	141.573
		274	141.58
		274.5	141.494
		275	141.437
		275.5	141.454
		276	141.654
		276.5	141.668
		277	141.68
		277.5	141.843
		278	141.548
		278.5	141.459
		279	141.688
		279.5	141.582
		280	141.759
		280.5	141.408
		281	141.501
		281.5	141.611
		282	141.474
		282.5	141.482
		283	141.18
		283.5	140.971
		284	140.548
		284.5	140.31
		285	140
		285.5	139.538
		286	139.049
		286.5	138.583
		287	137.917
		287.5	137.807
		288	137.278
		288.5	137.033
		289	136.463
		289.5	136.487
		290	135.998
		290.5	135.802
		291	135.734
		291.5	135.611
		292	135.601
		292.5	135.461
		293	135.557
		293.5	135.159
		294	135.193
		294.5	135.163
		295	135.153
		295.5	135.215
		296	135.045
		296.5	135.151
		297	135.193
		297.5	135.269
		298	135.316
		298.5	135.087
		299	135.041
		299.5	135.173
		300	134.989
		300.5	134.706
		301	134.854
		301.5	135.129
		302	134.695
		302.5	135.05
		303	134.874
		303.5	134.852
		304	134.606
		304.5	134.824
		305	134.68
		305.5	134.761
		306	134.918
		306.5	134.933
		307	134.884
		307.5	134.841
		308	134.684
		308.5	134.674
		309	134.52
		309.5	134.815
		310	134.598
		310.5	134.697
		311	134.598
		311.5	134.534
		312	134.498
		312.5	134.539
		313	134.81
		313.5	134.707
		314	134.744
		314.5	134.916
		315	134.598
		315.5	134.503
		316	134.755
		316.5	134.525
		317	134.534
		317.5	134.599
		318	134.803
		318.5	134.611
		319	134.421
		319.5	134.397
		320	134.324
		320.5	134.461
		321	134.414
		321.5	134.414
		322	134.532
		322.5	134.52
		323	134.508
		323.5	134.257
		324	134.451
		324.5	134.596
		325	134.469
		325.5	134.267
		326	134.515
		326.5	134.5
		327	134.633
		327.5	134.392
		328	134.454
		328.5	134.378
		329	134.237
		329.5	134.404
		330	134.127
		330.5	134.439
		331	134.389
		331.5	134.427
		332	134.193
		332.5	134.119
		333	134.532
		333.5	134.333
		334	134.448
		334.5	134.12
		335	134.282
		335.5	134.454
		336	134.297
		336.5	134.358
		337	134.331
		337.5	134.567
		338	134.345
		338.5	134.469
		339	134.412
		339.5	134.38
		340	134.594
		340.5	134.301
		341	134.422
		341.5	134.412
		342	134.95
		342.5	135.37
		343	135.944
		343.5	136.466
		344	137.038
		344.5	137.402
		345	137.919
		345.5	138.374
		346	138.887
		346.5	139.229
		347	139.356
		347.5	139.806
		348	139.573
		348.5	139.993
		349	140.057
		349.5	140.327
		350	140.376
		350.5	140.411
		351	140.273
		351.5	140.509
		352	140.862
		352.5	140.776
		353	140.592
		353.5	140.464
		354	140.87
		354.5	140.718
		355	140.884
		355.5	140.717
		356	140.627
		356.5	140.879
		357	141.02
		357.5	140.862
		358	140.637
		358.5	140.85
		359	141
		359.5	140.917
		360	140.816
		360.5	140.953
		361	141.059
		361.5	140.715
		362	140.872
		362.5	140.958
		363	140.902
		363.5	140.779
		364	140.848
		364.5	140.82
		365	140.943
		365.5	141.201
		366	141.051
		366.5	141.135
		367	141.238
		367.5	140.939
		368	141.037
		368.5	141.148
		369	141.101
		369.5	141.002
		370	141.191
		370.5	141.103
		371	140.774
		371.5	140.796
		372	140.978
		372.5	140.922
		373	140.781
		373.5	141.088
		374	141.147
		374.5	141.137
		375	141.153
		375.5	141.196
		376	141.479
		376.5	141.071
		377	141.008
		377.5	141.145
		378	141.314
		378.5	141.211
		379	141.133
		379.5	141.106
		380	140.868
		380.5	141.084
		381	141.083
		381.5	141.182
		382	141.214
		382.5	141.078
		383	141.229
		383.5	141.084
		384	141.108
		384.5	141.116
		385	141.049
		385.5	141.103
		386	141.153
		386.5	141.3
		387	141.159
		387.5	141.088
		388	140.97
		388.5	141.148
		389	141.243
		389.5	141.268
		390	141.191
		390.5	141.127
		391	140.761
		391.5	141.324
		392	141.25
		392.5	141.246
		393	141.27
		393.5	141.057
		394	141.315
		394.5	140.993
		395	141.039
		395.5	141.189
		396	140.981
		396.5	140.906
		397	140.993
		397.5	140.927
		398	141.339
		398.5	141.272
		399	141.169
		399.5	141.054
		400	141.218

## Sheet: Fig. 8D
			Time	O2, mm Hg
			0	21.366
			0.5	21.3418
			1	21.3409
			1.5	21.3525
			2	21.3527
			2.5	21.3838
			3	21.3635
			3.5	21.3331
			4	21.3443
			4.5	21.3459
			5	21.3242
			5.5	21.3203
			6	21.3043
			6.5	21.3331
			7	21.3132
			7.5	21.331
			8	21.3047
			8.5	21.2775
			9	21.3534
			9.5	21.3617
			10	21.3155
			10.5	21.2917
			11	21.3244
			11.5	21.2707
			12	21.3153
			12.5	21.2881
			13	21.3335
			13.5	21.3274
			14	21.3205
			14.5	21.3084
			15	21.318
			15.5	21.2961
			16	21.2746
			16.5	21.3114
			17	21.3089
			17.5	21.2293
			18	21.2686
			18.5	21.2449
			19	21.3201
			19.5	21.2673
			20	21.2835
			20.5	21.2846
			21	21.2615
			21.5	21.2609
			22	21.2705
			22.5	21.2618
			23	21.2373
			23.5	21.2807
			24	21.2487
			24.5	21.2593
			25	21.2279
			25.5	21.2762
			26	21.2078
			26.5	21.2469
			27	21.2417
			27.5	21.2405
			28	21.2026
			28.5	21.2517
			29	21.2378
			29.5	21.1665
			30	21.043
			30.5	20.9469
			31	20.8582
			31.5	20.7766
			32	20.675
			32.5	20.5316
			33	20.3139
			33.5	19.9767
			34	19.7256
			34.5	19.3637
			35	19.3822
			35.5	18.6562
			36	17.8111
			36.5	16.871
			37	15.913
			37.5	14.9866
			38	14.1262
			38.5	13.2905
			39	12.5136
			39.5	11.8797
			40	11.2657
			40.5	10.7469
			41	10.3212
			41.5	9.84854
			42	9.57379
			42.5	9.24806
			43	8.97605
			43.5	8.79364
			44	8.59524
			44.5	8.39226
			45	8.283
			45.5	8.21534
			46	8.02379
			46.5	7.94356
			47	7.85921
			47.5	7.84001
			48	7.7056
			48.5	7.60983
			49	7.63932
			49.5	7.57783
			50	7.46902
			50.5	7.45714
			51	7.40571
			51.5	7.39359
			52	7.37942
			52.5	7.30056
			53	7.27267
			53.5	7.26307
			54	7.21896
			54.5	7.22033
			55	7.18718
			55.5	7.12867
			56	7.1609
			56.5	7.09347
			57	7.07747
			57.5	7.10078
			58	7.05575
			58.5	7.06169
			59	6.99655
			59.5	7.07449
			60	7.06238
			60.5	7.05941
			61	7.02764
			61.5	7.03724
			62	7.00363
			62.5	7.06649
			63	7.33096
			63.5	7.81692
			64	8.55021
			64.5	9.48258
			65	10.5901
			65.5	11.7282
			66	12.7853
			66.5	13.9061
			67	14.8698
			67.5	15.7699
			68	16.4776
			68.5	17.1304
			69	17.644
			69.5	18.1346
			70	18.5229
			70.5	18.9101
			71	19.1575
			71.5	19.4286
			72	19.6247
			72.5	19.8277
			73	19.9184
			73.5	20.0649
			74	20.1552
			74.5	20.2416
			75	20.3429
			75.5	20.387
			76	20.4409
			76.5	20.5321
			77	20.5671
			77.5	20.5916
			78	20.6533
			78.5	20.6915
			79	20.6766
			79.5	20.7863
			80	20.7694
			80.5	20.7925
			81	20.7772
			81.5	20.8419
			82	20.8565
			82.5	20.8775
			83	20.8384
			83.5	20.8154
			84	20.8613
			84.5	20.9502
			85	20.9278
			85.5	20.9141
			86	20.9331
			86.5	20.8846
			87	20.9783
			87.5	20.9543
			88	20.976
			88.5	20.9934
			89	20.9294
			89.5	20.9422
			90	20.9987
			90.5	20.9879
			91	20.9687
			91.5	21.014
			92	21.0442
			92.5	20.9959
			93	20.987
			93.5	21.0259
			94	21.0103
			94.5	21.0302
			95	21.0186
			95.5	21.0101
			96	21.0428
			96.5	21.0483
			97	21.0325
			97.5	21.0444
			98	21.0666
			98.5	21.0263
			99	21.0618
			99.5	21.025
			100	21.0878
			100.5	21.051
			101	21.0606
			101.5	21.0574
			102	20.9724
			102.5	20.9564
			103	20.9888
			103.5	20.9765
			104	20.9781
			104.5	20.9943
			105	21.0224
			105.5	21.019
			106	20.9758
			106.5	21.0117
			107	21.0341
			107.5	21.0055
			108	21.0727
			108.5	21.0309
			109	20.9655
			109.5	21.0108
			110	20.9996
			110.5	21.0023
			111	20.961
			111.5	21.0108
			112	20.9808
			112.5	21.0163
			113	20.953
			113.5	20.9927
			114	21.0172
			114.5	20.9834
			115	21.0147
			115.5	21.024
			116	21.0275
			116.5	21.0119
			117	21.0149
			117.5	21.0163
			118	21.0176
			118.5	21.0218
			119	20.9978
			119.5	21.0286
			120	21.0183
			120.5	21.0051
			121	21.0252
			121.5	20.9925
			122	21.0117
			122.5	21.0448
			123	21.0188
			123.5	21.022
			124	20.9996
			124.5	21.0487
			125	20.9991
			125.5	21.059
			126	20.9955
			126.5	20.982
			127	20.9582
			127.5	20.9875
			128	20.9079
			128.5	20.9651
			129	20.9975
			129.5	21.041
			130	20.9555
			130.5	21.0069
			131	20.9683
			131.5	21.0094
			132	20.9676
			132.5	20.9607
			133	21.0186
			133.5	20.9975
			134	20.9694
			134.5	21.0005
			135	21.019
			135.5	20.998
			136	20.9872
			136.5	20.9568
			137	20.9575
			137.5	20.9509
			138	20.9815
			138.5	20.9838
			139	20.9978
			139.5	21.0231
			140	21.0362
			140.5	20.9619
			141	21.0247
			141.5	20.985
			142	21.0355
			142.5	21.0032
			143	20.9607
			143.5	20.979
			144	20.9822
			144.5	20.9795
			145	20.9797
			145.5	20.9806
			146	20.9621
			146.5	21.0016
			147	21.0416
			147.5	21.0069
			148	21.0005
			148.5	20.971
			149	20.9674
			149.5	20.9982
			150	20.9294
			150.5	20.849
			151	20.6969
			151.5	20.5683
			152	20.379
			152.5	20.1431
			153	19.9879
			153.5	19.8446
			154	19.656
			154.5	19.5931
			155	19.5486
			155.5	19.4953
			156	19.4619
			156.5	19.4148
			157	19.3625
			157.5	19.3646
			158	19.3529
			158.5	19.3079
			159	19.2891
			159.5	19.3323
			160	19.2713
			160.5	19.2962
			161	19.2791
			161.5	19.2747
			162	19.2585
			162.5	19.2647
			163	19.336
			163.5	19.3179
			164	19.2795
			164.5	19.2592
			165	19.285
			165.5	19.2382
			166	19.2331
			166.5	19.2802
			167	19.2658
			167.5	19.2359
			168	19.2393
			168.5	19.2418
			169	19.2185
			169.5	19.2112
			170	19.2635
			170.5	19.2402
			171	19.2276
			171.5	19.2544
			172	19.2423
			172.5	19.2626
			173	19.264
			173.5	19.2226
			174	19.2091
			174.5	19.2423
			175	19.2192
			175.5	19.2011
			176	19.2686
			176.5	19.1945
			177	19.2708
			177.5	19.1938
			178	19.162
			178.5	19.2224
			179	19.2073
			179.5	19.2162
			180	19.2459
			180.5	19.2414
			181	19.1933
			181.5	19.2791
			182	19.3648
			182.5	19.4139
			183	19.4932
			183.5	19.57
			184	19.7157
			184.5	19.8309
			185	19.9918
			185.5	20.1221
			186	20.1758
			186.5	20.2892
			187	20.3602
			187.5	20.4389
			188	20.4661
			188.5	20.5568
			189	20.5701
			189.5	20.558
			190	20.6809
			190.5	20.6268
			191	20.7392
			191.5	20.7271
			192	20.7431
			192.5	20.7486
			193	20.7783
			193.5	20.8245
			194	20.7847
			194.5	20.8046
			195	20.7582
			195.5	20.7939
			196	20.8234
			196.5	20.8215
			197	20.8236
			197.5	20.8238
			198	20.8398
			198.5	20.8122
			199	20.8643
			199.5	20.8442
			200	20.8908
			200.5	20.8348
			201	20.8314
			201.5	20.8346
			202	20.8563
			202.5	20.8826
			203	20.8752
			203.5	20.8551
			204	20.8782
			204.5	20.8309
			205	20.8627
			205.5	20.8935
			206	20.8554
