# Supplementary material for: Fluidics system for resolving concentration-dependent effects of dissolved gases on tissue metabolism
Source: eLife. 2021 Nov 4;10:e66716. doi: 10.7554/eLife.66716 (PMC8660022; doi:10.7554/eLife.66716)
Supplement: Figure 9—source data 1. [file elife-66716-fig9-data1.xlsx]

## Sheet: Fig. 2A
Time
	Outflow	Inflow
-137.5	118.038	143.536
-137	108.545	143.504
-136.5	108.394	143.44
-136	108.682	143.536
-135.5	108.699	143.473
-135	109.004	143.444
-134.5	109.09	143.738
-134	108.887	143.638
-133.5	108.993	143.732
-133	109.176	143.692
-132.5	109.273	143.308
-132	109.326	143.417
-131.5	109.514	143.52
-131	109.376	143.631
-130.5	109.784	143.315
-130	110.454	143.312
-129.5	110.417	143.326
-129	110.514	143.466
-128.5	110.532	143.348
-128	110.399	143.393
-127.5	110.348	143.33
-127	110.604	143.279
-126.5	110.544	143.084
-126	111.01	143.23
-125.5	111.206	142.977
-125	110.995	143.198
-124.5	111.283	143.136
-124	111.312	142.86
-123.5	111.804	143.06
-123	111.816	143.116
-122.5	111.978	142.961
-122	111.853	142.743
-121.5	112.16	142.099
-121	112.132	141.932
-120.5	112.227	141.778
-120	112.072	141.642
-119.5	112.268	141.685
-119	112.448	141.733
-118.5	112.586	141.34
-118	112.862	141.871
-117.5	113.092	141.696
-117	113.016	141.753
-116.5	113.538	141.68
-116	114.216	141.977
-115.5	114.037	141.774
-115	114.656	141.757
-114.5	114.376	141.628
-114	114.61	141.674
-113.5	114.532	141.696
-113	114.576	141.635
-112.5	114.446	141.571
-112	114.617	141.533
-111.5	114.811	141.689
-111	114.532	141.757
-110.5	114.567	141.624
-110	114.762	141.653
-109.5	114.767	141.583
-109	114.448	141.671
-108.5	115.102	141.424
-108	114.758	141.41
-107.5	114.8	141.412
-107	114.978	141.601
-106.5	115.027	141.513
-106	115.085	141.549
-105.5	114.79	141.649
-105	115.062	141.613
-104.5	114.803	141.644
-104	115.205	141.588
-103.5	115.187	141.653
-103	114.97	141.676
-102.5	115.195	141.626
-102	115.143	141.422
-101.5	115.235	141.762
-101	115.095	141.758
-100.5	115.065	141.605
-100	115.212	141.687
-99.5	115.326	141.563
-99	115.349	141.78
-98.5	115.112	141.814
-98	114.911	141.701
-97.5	114.978	141.544
-97	115.07	141.512
-96.5	114.841	141.533
-96	115.245	141.522
-95.5	115.042	141.512
-95	114.942	141.66
-94.5	115.021	141.494
-94	115.052	141.397
-93.5	115.055	141.24
-93	114.954	141.39
-92.5	115.145	141.712
-92	115.003	141.46
-91.5	115.045	141.597
-91	114.869	141.555
-90.5	114.86	141.587
-90	115.111	141.501
-89.5	114.8	141.385
-89	115.063	141.454
-88.5	114.896	141.397
-88	114.998	141.597
-87.5	114.857	141.287
-87	114.949	141.158
-86.5	115.076	141.312
-86	115.073	141.36
-85.5	114.942	141.201
-85	114.817	141.426
-84.5	114.726	141.365
-84	114.795	141.376
-83.5	114.79	141.18
-83	114.732	141.089
-82.5	114.78	141.151
-82	114.514	141.385
-81.5	114.751	141.144
-81	114.478	141.052
-80.5	114.752	141.119
-80	114.56	141.167
-79.5	114.62	141.178
-79	114.584	141.203
-78.5	114.627	140.986
-78	114.465	140.708
-77.5	114.456	140.845
-77	114.426	140.872
-76.5	114.627	141.066
-76	114.282	140.824
-75.5	114.246	140.988
-75	114.594	140.753
-74.5	114.438	140.582
-74	114.515	140.859
-73.5	114.409	140.794
-73	114.554	141.032
-72.5	114.466	140.723
-72	114.659	140.817
-71.5	114.56	140.778
-71	114.435	140.724
-70.5	114.449	140.623
-70	114.421	140.899
-69.5	114.676	140.824
-69	114.489	140.781
-68.5	114.299	140.755
-68	114.335	140.742
-67.5	114.451	140.668
-67	114.596	140.336
-66.5	114.619	140.542
-66	114.677	140.785
-65.5	114.487	140.893
-65	114.571	140.474
-64.5	114.685	140.522
-64	114.502	140.538
-63.5	114.342	140.62
-63	114.421	140.795
-62.5	114.468	140.623
-62	114.548	140.561
-61.5	114.777	140.779
-61	114.603	140.324
-60.5	114.554	140.503
-60	114.577	140.294
-59.5	114.637	140.354
-59	114.571	140.446
-58.5	114.419	140.558
-58	114.58	140.538
-57.5	114.507	140.216
-57	114.431	140.382
-56.5	114.764	140.386
-56	114.644	140.359
-55.5	114.827	140.228
-55	114.604	140.256
-54.5	114.553	140.241
-54	114.769	140.087
-53.5	114.598	140.304
-53	114.666	140.255
-52.5	114.542	140.179
-52	114.505	140.299
-51.5	114.55	140.145
-51	114.676	140
-50.5	114.548	140.073
-50	114.418	139.961
-49.5	114.416	140.048
-49	114.54	140.111
-48.5	114.596	140.136
-48	114.627	140.166
-47.5	114.613	139.908
-47	114.607	140.028
-46.5	114.508	140.196
-46	114.329	140.034
-45.5	114.624	139.847
-45	114.571	139.979
-44.5	114.781	140.122
-44	114.577	139.937
-43.5	114.504	139.779
-43	114.764	140.058
-42.5	114.509	139.998
-42	114.502	139.871
-41.5	114.626	140.108
-41	114.9	139.783
-40.5	114.791	140.009
-40	114.818	139.894
-39.5	114.711	139.967
-39	114.673	139.818
-38.5	114.928	139.737
-38	114.757	140.032
-37.5	114.619	140.074
-37	114.675	139.598
-36.5	114.765	139.891
-36	114.665	139.94
-35.5	114.703	139.676
-35	114.899	139.79
-34.5	114.882	139.654
-34	114.817	139.982
-33.5	114.688	140.099
-33	114.962	139.824
-32.5	114.61	139.7
-32	114.633	139.79
-31.5	114.761	139.884
-31	114.798	139.714
-30.5	114.81	139.744
-30	114.653	139.72
-29.5	114.877	139.526
-29	114.673	139.693
-28.5	115	139.69
-28	114.908	139.884
-27.5	114.823	139.787
-27	115.127	139.401
-26.5	114.944	139.686
-26	114.903	139.584
-25.5	114.734	139.783
-25	114.929	139.561
-24.5	114.87	139.285
-24	115.143	139.776
-23.5	114.952	139.594
-23	114.709	139.609
-22.5	114.892	139.637
-22	114.882	139.616
-21.5	114.798	139.466
-21	114.755	139.725
-20.5	114.719	139.503
-20	115.094	139.639
-19.5	115.01	139.417
-19	115.073	139.257
-18.5	114.834	139.538
-18	114.872	139.434
-17.5	114.965	139.484
-17	115.073	139.577
-16.5	114.66	139.866
-16	114.784	139.57
-15.5	114.919	139.683
-15	114.926	139.38
-14.5	114.864	139.568
-14	115.183	139.519
-13.5	114.862	139.427
-13	115.085	139.536
-12.5	115.15	139.603
-12	115.037	139.552
-11.5	115.108	139.406
-11	115.205	139.484
-10.5	115.045	139.501
-10	115.202	139.572
-9.5	115.164	139.252
-9	115.122	139.459
-8.5	115.179	139.053
-8	115.345	139.331
-7.5	115.045	139.245
-7	115.182	139.341
-6.5	115.12	139.503
-6	115.252	139.552
-5.5	114.889	139.471
-5	115.209	139.531
-4.5	115.34	139.464
-4	115.086	139.31
-3.5	115.343	139.404
-3	115.275	139.327
-2.5	115.056	139.566
-2	115.369	139.543
-1.5	115.107	139.503
-1	115.151	139.368
-0.5	114.843	139.371
0	114.788	139.471
0.5	114.277	139.556
1	113.793	139.288
1.5	112.403	139.243
2	110.389	139.297
2.5	107.66	139.396
3	104.483	139.36
3.5	101.605	139.345
4	99.695	139.304
4.5	98.66	139.241
5	98.094	139.288
5.5	97.722	139.192
6	97.402	139.44
6.5	97.539	139.171
7	97.446	139.573
7.5	97.364	139.164
8	97.301	138.931
8.5	97.012	139.353
9	96.949	139.18
9.5	96.609	139.104
10	96.407	139.199
10.5	96.351	138.829
11	96.088	139.194
11.5	96.189	139.436
12	95.845	138.964
12.5	95.549	139.051
13	95.335	139.09
13.5	95.176	138.994
14	95.185	139.129
14.5	94.862	138.752
15	94.534	138.75
15.5	94.456	139.15
16	94.388	138.913
16.5	94.368	139.027
17	93.8	138.89
17.5	93.69	139.057
18	93.653	138.932
18.5	93.512	138.757
19	93.284	139.001
19.5	93.429	138.696
20	93.142	138.896
20.5	92.853	138.796
21	92.892	139.034
21.5	92.791	138.908
22	92.687	138.761
22.5	92.297	138.866
23	92.18	139.044
23.5	92.17	138.773
24	92.226	138.685
24.5	92.172	138.939
25	91.771	139.183
25.5	91.803	138.848
26	91.728	138.882
26.5	91.567	139.018
27	91.498	138.853
27.5	91.52	138.757
28	91.251	138.957
28.5	91.421	138.892
29	91.427	138.687
29.5	91.378	139.195
30	91.235	138.705
30.5	91.249	138.748
31	91.098	138.885
31.5	91.2	138.733
32	91.134	138.836
32.5	91.284	138.745
33	90.982	139.029
33.5	91.075	138.75
34	90.912	138.936
34.5	90.849	138.841
35	91.12	138.831
35.5	90.821	138.792
36	90.753	138.883
36.5	90.854	138.74
37	90.753	138.871
37.5	90.803	138.644
38	90.565	138.692
38.5	90.894	138.553
39	90.775	138.915
39.5	90.719	138.651
40	90.752	138.736
40.5	90.607	138.589
41	90.539	138.768
41.5	90.659	138.769
42	90.595	138.675
42.5	90.633	138.575
43	90.374	138.647
43.5	90.565	138.614
44	90.457	138.745
44.5	90.434	138.368
45	90.455	138.518
45.5	90.533	138.827
46	90.609	138.542
46.5	90.612	138.806
47	90.585	138.486
47.5	90.454	138.507
48	90.518	138.68
48.5	90.478	138.493
49	90.57	138.745
49.5	90.499	138.652
50	90.526	138.425
50.5	90.427	138.45
51	90.579	138.481
51.5	90.576	138.572
52	90.561	138.293
52.5	90.448	138.439
53	90.406	138.483
53.5	90.465	138.736
54	90.347	138.451
54.5	90.484	138.514
55	90.613	138.521
55.5	90.365	138.526
56	90.37	138.261
56.5	90.45	138.525
57	90.507	138.361
57.5	90.466	138.087
58	90.439	137.264
58.5	90.403	135.413
59	90.357	132.189
59.5	90.347	126.981
60	90.531	120.618
60.5	90.548	113.475
61	90.473	105.662
61.5	90.396	97.853
62	90.13	90.49
62.5	89.519	83.484
63	88.29	77.721
63.5	86.348	72.772
64	83.723	68.455
64.5	80.193	65.041
65	76.012	62.234
65.5	71.228	59.785
66	65.762	57.906
66.5	60.308	56.152
67	54.726	54.79
67.5	49.55	53.512
68	44.912	52.446
68.5	40.499	51.459
69	36.559	50.557
69.5	33.273	49.836
70	30.31	49.092
70.5	27.656	48.417
71	25.414	47.795
71.5	23.533	47.322
72	21.932	46.749
72.5	20.473	46.184
73	19.313	45.82
73.5	18.263	45.25
74	17.372	44.907
74.5	16.575	44.498
75	15.902	44.203
75.5	15.233	43.761
76	14.73	43.463
76.5	14.225	43.146
77	13.774	42.78
77.5	13.353	42.577
78	12.942	42.249
78.5	12.597	41.926
79	12.273	41.68
79.5	11.968	41.488
80	11.66	41.197
80.5	11.372	41.049
81	11.18	40.727
81.5	10.896	40.572
82	10.692	40.331
82.5	10.489	40.175
83	10.27	40.047
83.5	10.128	39.783
84	9.955	39.622
84.5	9.799	39.497
85	9.618	39.23
85.5	9.49	39.254
86	9.356	38.972
86.5	9.226	38.86
87	9.104	38.602
87.5	8.991	38.444
88	8.887	38.44
88.5	8.78	38.137
89	8.681	38.011
89.5	8.562	37.823
90	8.498	37.713
90.5	8.429	37.661
91	8.318	37.398
91.5	8.255	37.313
92	8.138	37.242
92.5	8.068	37.069
93	7.959	36.852
93.5	7.909	36.839
94	7.78	36.699
94.5	7.742	36.492
95	7.652	36.422
95.5	7.579	36.252
96	7.489	36.173
96.5	7.447	36.133
97	7.386	35.992
97.5	7.303	35.8
98	7.265	35.691
98.5	7.191	35.661
99	7.148	35.498
99.5	7.088	35.372
100	7.015	35.386
100.5	6.956	35.148
101	6.897	35.087
101.5	6.832	35.01
102	6.834	34.93
102.5	6.776	34.868
103	6.698	34.696
103.5	6.636	34.647
104	6.624	34.604
104.5	6.575	34.467
105	6.508	34.4
105.5	6.446	34.269
106	6.426	34.24
106.5	6.397	34.135
107	6.319	34.08
107.5	6.305	33.982
108	6.277	33.888
108.5	6.235	33.797
109	6.203	33.778
109.5	6.143	33.564
110	6.124	33.566
110.5	6.068	33.547
111	6.027	33.428
111.5	5.969	33.382
112	5.948	33.144
112.5	5.927	33.213
113	5.917	33.061
113.5	5.863	33.064
114	5.83	32.919
114.5	5.793	32.915
115	5.779	32.803
115.5	5.729	32.783
116	5.672	32.677
116.5	5.644	32.651
117	5.629	32.538
117.5	5.611	32.525
118	5.539	32.419
118.5	5.552	32.335
119	5.494	32.292
119.5	5.444	32.252
120	5.432	32.129
120.5	5.406	32.149
121	5.352	32.015
121.5	5.362	31.994
122	5.328	31.909
122.5	5.282	31.906
123	5.259	31.832
123.5	5.244	31.745
124	5.209	31.664
124.5	5.182	31.701
125	5.146	31.593
125.5	5.14	31.505
126	5.129	31.537
126.5	5.082	31.43
127	5.055	31.395
127.5	5.058	31.391
128	5.007	31.323
128.5	5.014	31.291
129	4.985	31.228
129.5	4.957	31.18
130	4.958	31.143
130.5	4.918	31.054
131	4.916	31.046
131.5	4.922	31.065
132	4.862	30.971
132.5	4.838	30.937
133	4.816	30.861
133.5	4.79	30.795
134	4.764	30.8
134.5	4.777	30.732
135	4.735	30.734
135.5	4.723	30.631
136	4.725	30.665
136.5	4.665	30.536
137	4.666	30.529
137.5	4.657	30.479
138	4.62	30.483
138.5	4.632	30.389
139	4.599	30.411
139.5	4.598	30.327
140	4.581	30.291
140.5	4.56	30.279
141	4.553	30.277
141.5	4.512	30.204
142	4.521	30.164
142.5	4.49	30.151
143	4.452	30.081
143.5	4.465	30.092
144	4.427	30.063
144.5	4.4	30.069
145	4.401	30.042
145.5	4.383	30.02
146	4.398	29.94
146.5	4.381	29.965
147	4.349	29.895
147.5	4.308	29.967
148	4.324	29.851
148.5	4.314	29.839
149	4.311	29.806
149.5	4.307	29.794
150	4.268	29.75
150.5	4.306	29.647
151	4.285	29.657
151.5	4.248	29.647
152	4.236	29.583
152.5	4.24	29.617
153	4.232	29.554
153.5	4.201	29.526
154	4.204	29.473
154.5	4.168	29.385
155	4.164	29.417
155.5	4.158	29.367
156	4.115	29.38
156.5	4.128	29.372
157	4.111	29.368
157.5	4.098	29.326
158	4.097	29.26
158.5	4.05	29.232
159	4.061	29.205
159.5	4.043	29.139
160	4.046	29.099
160.5	4.021	29.068
161	4.006	29.009
161.5	4.018	29.008
162	3.975	29
162.5	3.988	28.978
163	3.946	28.987
163.5	3.96	28.991
164	3.964	28.945
164.5	3.963	28.905
165	3.913	28.872
165.5	3.911	28.842
166	3.903	28.851
166.5	3.905	28.826
167	3.892	28.789
167.5	3.847	28.774
168	3.857	28.793
168.5	3.84	28.656
169	3.828	28.717
169.5	3.849	28.642
170	3.825	28.613
170.5	3.794	28.607
171	3.798	28.584
171.5	3.798	28.523
172	3.806	28.51
172.5	3.772	28.495
173	3.756	28.465
173.5	3.75	28.427
174	3.751	28.379
174.5	3.737	28.395
175	3.749	28.368
175.5	3.709	28.321
176	3.713	28.299
176.5	3.7	28.271
177	3.68	28.297
177.5	3.678	28.246
178	3.672	28.235
178.5	3.661	28.371
179	3.649	29.15
179.5	3.63	31.335
180	3.626	35.118
180.5	3.616	40.901
181	3.616	48.026
181.5	3.606	56.04
182	3.609	64.648
182.5	3.638	72.668
183	3.719	80.614
183.5	4.01	87.39
184	4.499	93.491
184.5	5.479	98.368
185	7.009	102.573
185.5	9.313	106.089
186	12.582	108.879
186.5	16.753	111.274
187	21.656	113.001
187.5	27.165	114.564
188	33.305	115.809
188.5	39.747	117.28
189	46.031	117.92
189.5	52.109	118.666
190	57.415	119.309
190.5	62.197	120.098
191	66.408	120.815
191.5	70.095	121.196
192	73.086	121.57
192.5	75.732	122.135
193	78.068	122.62
193.5	80.222	122.813
194	81.91	123.197
194.5	83.5	123.7
195	84.504	123.82
195.5	85.546	124.285
196	86.635	124.496
196.5	87.494	124.762
197	88.415	124.931
197.5	89.257	125.176
198	90.076	125.343
198.5	90.898	125.66
199	91.576	125.969
199.5	92.062	126.286
200	92.529	126.483
200.5	93.151	126.5
201	93.443	126.581
201.5	94.004	126.669
202	94.315	127.139
202.5	94.594	127.116
203	95.131	127.268
203.5	95.425	127.459
204	95.436	127.951
204.5	96.053	127.903
205	96.156	127.686
205.5	96.331	128.094
206	96.638	128.207
206.5	96.665	128.383
207	96.816	128.421
207.5	97.193	128.56
208	97.442	128.439
208.5	97.597	128.631
209	97.694	128.791
209.5	97.939	129.14
210	98.031	128.889
210.5	98.165	129.151
211	98.48	129.515
211.5	98.538	129.164
212	98.767	129.458
212.5	98.892	129.385
213	98.821	129.493
213.5	98.998	129.317
214	99.017	129.716
214.5	99.267	129.687
215	99.38	129.948
215.5	99.566	130.037
216	99.509	129.977
216.5	99.726	129.953
217	99.739	129.988
217.5	99.642	130.332
218	99.864	130.368
218.5	100.079	130.373
219	100.085	130.509
219.5	100.033	130.537
220	100.145	130.501
220.5	100.341	130.988
221	100.446	130.89
221.5	100.471	130.767
222	100.626	130.948
222.5	100.511	130.81
223	100.794	131.078
223.5	100.766	130.835
224	100.633	130.872
224.5	100.907	131.131
225	100.774	131.427
225.5	100.787	131.248
226	100.888	131.346
226.5	101.069	131.453
227	101.212	131.496
227.5	101.145	131.428
228	101.369	131.681
228.5	101.34	131.63
229	101.145	131.743
229.5	101.307	131.766
230	101.574	131.685
230.5	101.411	131.807
231	101.67	131.864
231.5	101.633	132.025
232	101.867	131.963
232.5	101.771	132.096
233	101.841	131.826
233.5	101.866	132.001
234	101.837	132.218
234.5	101.964	131.995
235	101.875	132.211
235.5	102.039	132.316
236	102.097	132.213
236.5	102.097	132.389
237	102.03	132.436
237.5	102.476	132.236
238	102.342	132.276
238.5	102.471	132.204
239	102.489	132.386
239.5	102.57	132.487
240	102.585	132.424
240.5	102.329	132.701
241	102.38	132.726
241.5	102.556	132.963
242	102.525	132.916
242.5	102.58	132.662
243	102.623	132.681
243.5	102.384	132.651
244	102.746	132.937
244.5	102.562	132.883
245	102.652	132.965
245.5	102.638	133
246	102.892	132.833
246.5	103.011	132.86
247	102.811	133.104
247.5	102.863	132.896
248	102.963	132.945
248.5	103.255	132.888
249	102.788	133.096
249.5	103.098	132.916
250	103.098	132.982
250.5	103.058	133.069
251	103.163	133.156
251.5	103.06	133.243
252	102.994	133.265
252.5	102.868	133.163
253	102.971	133.433
253.5	103.129	133.307
254	103.175	133.119
254.5	103.162	133.151
255	103.104	133.292
255.5	103.153	133.349
256	103.097	133.209
256.5	103.2	133.27
257	103.422	133.344
257.5	103.029	133.258
258	103.363	133.298
258.5	103.413	133.436
259	103.279	133.513
259.5	103.235	133.624
260	103.429	133.288
260.5	103.288	133.599
261	103.289	133.277
261.5	103.464	133.835
262	103.571	133.537
262.5	103.247	133.409
263	103.407	133.693
263.5	103.276	133.466
264	103.411	133.303
264.5	103.394	133.734
265	103.497	133.666
265.5	103.544	133.688
266	103.517	133.697
266.5	103.451	133.771
267	103.417	133.581
267.5	103.244	133.503
268	103.327	133.697
268.5	103.5	133.633
269	103.426	133.683
269.5	103.313	133.702
270	103.731	133.954
270.5	103.58	133.831
271	103.692	133.722
271.5	103.632	133.754
272	103.583	134.052
272.5	103.455	133.737
273	103.586	133.939
273.5	103.659	133.756
274	103.485	133.801
274.5	103.727	133.904
275	103.592	133.857
275.5	103.569	133.964
276	103.605	134.061
276.5	103.419	134.034
277	103.322	133.909
277.5	103.461	134.121
278	103.595	134.056
278.5	103.435	133.803
279	103.598	134.012
279.5	103.674	133.777
280	103.469	133.932
280.5	103.556	134.034
281	103.439	134.137
281.5	103.497	133.961
282	103.592	133.806
282.5	103.703	133.885
283	103.727	133.937
283.5	103.437	133.973
284	103.772	134.145
284.5	103.703	134.074
285	103.487	133.958
285.5	103.658	133.764
286	103.684	134.034
286.5	103.648	134.142
287	103.579	134.243
287.5	103.368	134.003
288	103.432	134.072
288.5	103.331	133.99
289	103.421	133.966
289.5	103.435	133.951
290	103.371	134.219
290.5	103.362	134.165
291	103.38	134.105
291.5	103.536	133.993
292	103.377	134.045
292.5	103.479	133.97
293	103.256	134.115
293.5	103.63	134.165
294	103.553	133.97
294.5	103.444	134.037
295	103.306	134.229
295.5	103.333	134.263
296	103.549	133.921
296.5	103.429	134.066
297	103.314	134.118
297.5	103.433	133.875
298	103.389	134.088
298.5	103.433	134.214
299	103.322	134.106
299.5	103.311	134.251
300	103.363	134.079
300.5	103.226	134.292
301	103.351	134.387
301.5	103.18	134.035
302	103.264	133.998
302.5	103.132	134.081
303	103.375	134.039
303.5	103.084	134.416
304	103.35	134.138
304.5	103.226	134.132
305	103.185	134.404
305.5	103.248	134.05
306	103.087	134.209
306.5	102.958	134.267
307	103.037	134.25
307.5	103.306	134.253
308	103.129	134.219
308.5	103.302	134.378
309	103.406	134.208
309.5	104.106	134.312
310	105.233	134.067
310.5	107.66	134.607
311	110.132	134.343
311.5	113.047	134.137
312	116.493	134.113
312.5	119.477	133.921
313	122.402	133.948
313.5	124.423	134.13
314	125.924	134.015
314.5	127.052	134.077
315	127.586	134.204
315.5	127.684	133.873
316	127.996	134.118
316.5	128.235	134.091
317	128.283	134.045
317.5	128.24	134.04
318	128.354	133.905
318.5	128.467	134.226
319	128.377	134.208
319.5	128.506	133.919
320	128.708	134.062
320.5	128.736	133.971
321	128.64	134.196
321.5	128.728	134.103
322	128.699	134.253
322.5	129.024	134.307
323	128.901	134.111
323.5	128.885	134.083
324	129.05	133.997
324.5	128.749	134.138
325	129.127	134.219
325.5	128.895	134.192
326	128.932	134.175
326.5	128.921	134.29
327	129.156	134.16
327.5	129.244	134.204
328	129.206	134.201
328.5	128.934	134.201
329	128.961	133.991
329.5	129.067	134.04
330	128.684	134.382
330.5	128.89	134.209
331	129.055	134.224
331.5	128.775	134.155
332	128.588	134.072
332.5	128.724	134.373
333	129	134.284
333.5	128.851	134.309
334	128.788	134.128
334.5	128.827	134.099
335	128.838	134.077
335.5	128.848	134.304
336	128.752	134.159
336.5	129	133.882
337	129.093	134.01
337.5	129.53	134.282
338	129.917	134.219
338.5	130.319	134.132
339	130.762	134.113
339.5	130.608	134.184
340	131	134.189
340.5	131.08	134.126
341	131.35	134.235
341.5	131.674	134.331
342	131.955	134.299
342.5	132.198	134.427
343	132.213	134.223
343.5	132.545	134.228
344	132.898	134.074
344.5	132.841	134.01
345	133.122	134.169
345.5	133.389	134.064
346	132.966	134.334
346.5	133.337	134.235
347	133.463	134.165
347.5	133.594	134.206
348	133.586	134.24
348.5	133.668	134.191
349	133.724	134.238
349.5	133.876	134.394
350	133.884	134.074
350.5	133.722	134.285
351	133.81	134.361
351.5	134.073	134.089
352	133.844	134.331
352.5	133.955	134.101
353	133.984	134.341
353.5	133.631	134.282
354	134.018	134.4
354.5	133.803	134.449
355	133.795	134.206
355.5	133.756	134.312
356	134.045	134.064
356.5	133.864	134.187
357	133.797	134.399
357.5	134.168	134.147
358	133.781	134.032
358.5	133.78	134.155
359	133.982	134.263
359.5	134.085	134.465
360	133.901	134.189
360.5	133.63	134.243
361	133.91	134.064
361.5	133.839	134.177
362	133.85	134.344
362.5	134.324	134.253
363	133.977	134.336
363.5	134.045	134.029
364	134.018	134.275
364.5	134.149	134.202
365	134.033	134.229
365.5	133.942	134.192
366	134.07	134.387
366.5	133.857	134.312
367	133.955	134.167
367.5	133.776	133.401
368	133.837	131.759
368.5	133.797	128.473
369	133.884	123.826
369.5	133.847	117.511
370	133.736	110.475
370.5	133.883	102.798
371	133.867	94.958
371.5	133.673	87.458
372	133.243	80.574
372.5	132.048	74.743
373	130.558	69.719
373.5	128.304	65.387
374	125.145	61.815
374.5	121.314	59.103
375	116.377	56.688
375.5	111.003	54.704
376	105.311	53.305
376.5	99.163	51.863
377	93.497	50.69
377.5	87.792	49.676
378	82.484	48.825
378.5	77.535	47.952
379	72.927	47.184
379.5	68.897	46.695
380	65.373	45.993
380.5	62.222	45.409
381	59.464	44.941
381.5	57.186	44.418
382	55.057	43.989
382.5	53.383	43.485
383	51.848	43.158
383.5	50.582	42.817
384	49.374	42.414
384.5	48.155	42.031
385	47.266	41.784
385.5	46.534	41.436
386	45.646	41.104
386.5	45.067	40.837
387	44.418	40.543
387.5	43.673	40.383
388	43.205	39.995
388.5	42.609	39.829
389	42.019	39.569
389.5	41.604	39.377
390	41.143	39.223
390.5	40.755	39.054
391	40.344	38.74
391.5	40.025	38.618
392	39.686	38.473
392.5	39.318	38.212
393	39.01	38.084
393.5	38.778	37.837
394	38.447	37.651
394.5	38.174	37.45
395	37.991	37.331
395.5	37.558	37.166
396	37.394	37.079
396.5	37.172	36.855
397	36.978	36.769
397.5	36.958	36.616
398	36.607	36.46
398.5	36.418	36.357
399	36.192	36.201
399.5	36.058	36.039
400	35.919	36.028
400.5	35.678	35.889
401	35.521	35.775
401.5	35.354	35.687
402	35.222	35.463
402.5	35.089	35.323
403	34.911	35.249
403.5	34.865	35.148
404	34.687	35.064
404.5	34.607	34.982
405	34.399	34.811
405.5	34.326	34.778
406	34.202	34.68
406.5	34.049	34.565
407	33.979	34.479
407.5	33.809	34.441
408	33.764	34.345
408.5	33.623	34.214
409	33.452	34.14
409.5	33.431	34.042
410	33.256	34.038
410.5	33.231	33.932
411	33.102	33.894
411.5	32.981	33.726
412	32.982	33.64
412.5	32.896	33.575
413	32.604	33.515
413.5	32.67	33.42
414	32.499	33.35
414.5	32.481	33.259
415	32.375	33.282
415.5	32.361	33.211
416	32.348	33.112
416.5	32.183	33.04
417	32.239	32.963
417.5	32.015	32.909
418	31.991	32.834
418.5	31.863	32.773
419	31.795	32.815
419.5	31.819	32.741
420	31.655	32.73
420.5	31.651	32.618
421	31.559	32.492
421.5	31.539	32.438
422	31.427	32.488
422.5	31.396	32.361
423	31.37	32.363
423.5	31.339	32.331
424	31.263	32.139
424.5	31.26	32.164
425	31.129	32.19
425.5	31.123	32.099
426	30.983	32.032
426.5	31.002	32.065
427	31.029	31.95
427.5	30.906	31.988
428	30.784	31.898
428.5	30.854	31.861
429	30.805	31.891
429.5	30.727	31.799
430	30.724	31.728
430.5	30.699	31.713
431	30.623	31.681
431.5	30.571	31.591
432	30.518	31.643
432.5	30.449	31.562
433	30.475	31.611
433.5	30.401	31.563
434	30.425	31.517
434.5	30.328	31.574
435	30.402	31.616
435.5	30.341	31.517
436	30.246	31.557
436.5	30.292	31.511
437	30.187	31.43
437.5	30.184	31.46
438	30.167	31.45
438.5	30.239	31.385
439	30.224	31.393
439.5	30.12	31.354
440	30.072	31.294
440.5	30.053	31.232
441	30.035	31.252
441.5	30.104	31.2
442	30.152	31.16
442.5	30.069	31.151
443	30.032	31.145
443.5	30.08	31.117
444	30.03	31.139
444.5	29.936	31.08
445	29.967	31.028
445.5	29.938	31.062
446	29.858	30.983
446.5	29.923	30.901
447	29.83	30.99
447.5	29.823	30.899
448	29.762	30.861
448.5	29.788	30.827
449	29.732	30.901
449.5	29.803	30.839
450	29.664	30.803
450.5	29.796	30.794
451	29.636	30.753
451.5	29.587	30.748
452	29.671	30.722
452.5	29.657	30.678
453	29.613	30.698
453.5	29.632	30.692
454	29.568	30.564
454.5	29.556	30.611
455	29.546	30.614
455.5	29.494	30.644
456	29.556	30.66
456.5	29.465	30.647
457	29.447	30.604
457.5	29.387	30.56
458	29.473	30.557
458.5	29.315	30.527
459	29.369	30.533
459.5	29.44	30.483
460	29.335	30.5
460.5	29.292	30.465
461	29.269	30.469
461.5	29.295	30.523
462	29.271	30.394
462.5	29.325	30.397
463	29.283	30.437
463.5	29.297	30.351
464	29.197	30.35
464.5	29.235	30.41
465	29.305	30.355
465.5	29.231	30.305
466	29.178	30.267
466.5	29.258	30.259
467	29.207	30.251
467.5	29.116	30.303
468	29.059	30.212
468.5	29.118	30.229
469	29.108	30.308
469.5	29.105	30.183
470	29.115	30.231
470.5	29.033	30.209
471	29.048	30.195
471.5	28.991	30.179
472	28.965	30.202
472.5	28.95	30.171
473	29.014	30.165
473.5	28.959	30.198
474	28.989	30.151
474.5	28.935	30.128
475	28.95	30.078
475.5	28.948	30.092
476	28.934	30.114
476.5	28.898	30.099
477	28.913	30.039
477.5	28.858	30.095
478	28.899	30.054
478.5	28.925	30.05
479	28.882	30.017
479.5	28.896	29.954
480	28.868	29.93
480.5	28.847	29.958
481	28.785	29.89
481.5	28.886	30.045
482	28.795	30.041
482.5	28.831	29.967
483	28.802	29.943
483.5	28.75	29.92
484	28.81	29.885
484.5	28.692	29.943
485	28.82	29.916
485.5	28.821	29.903
486	28.763	29.824
486.5	28.749	29.81
487	28.736	29.843
487.5	28.769	29.799
488	28.782	29.779
488.5	28.758	29.838
489	28.683	29.781
489.5	28.717	29.754
490	28.633	29.808
490.5	28.699	29.745
491	28.588	29.757
491.5	28.651	29.707
492	28.613	29.762
492.5	28.596	29.742
493	28.591	29.689
493.5	28.598	29.717
494	28.516	29.708
494.5	28.522	29.711
495	28.548	29.603
495.5	28.55	29.649
496	28.482	29.612
496.5	28.441	29.653
497	28.531	29.572
497.5	28.522	29.652
498	28.586	29.599
498.5	28.45	29.548
499	28.456	29.583
499.5	28.478	29.516
500	28.41	29.578
500.5	28.39	29.529
501	28.422	29.461
501.5	28.399	29.55
502	28.417	29.56
502.5	28.408	29.702
503	28.409	30.459
503.5	28.28	32.416
504	28.324	36.209
504.5	28.303	41.921
505	28.289	49.201
505.5	28.267	57.463
506	28.341	65.758
506.5	28.343	74.132
507	28.603	81.854
507.5	29.096	88.733
508	30.254	94.682
508.5	32.15	99.566
509	34.934	103.632
509.5	38.846	106.993
510	43.58	109.622
510.5	49.051	111.519
511	54.946	113.298
511.5	61.306	114.867
512	67.522	115.936
512.5	73.906	116.878
513	79.721	117.811
513.5	85.239	118.706
514	90.227	119.367
514.5	94.839	119.848
515	98.958	120.386
515.5	102.067	120.985
516	105.237	121.675
516.5	107.802	121.678
517	109.845	122.016
517.5	111.875	122.714
518	113.532	122.97
518.5	114.813	123.151
519	116.092	123.818
519.5	116.996	123.773
520	118.056	124.1
520.5	119.049	124.223
521	119.783	124.856
521.5	120.034	124.928
522	120.928	125.288
522.5	121.348	125.548
523	121.72	125.532
523.5	122.556	125.666
524	122.753	125.99
524.5	123.193	126.261
525	123.751	126.013
525.5	124.074	126.432
526	124.136	126.686
526.5	124.686	126.806
527	124.818	126.892
527.5	125.403	126.936
528	125.258	127.342
528.5	125.674	127.47
529	125.747	127.486
529.5	126.257	127.568
530	126.54	127.9
530.5	126.654	127.766
531	126.779	128.097
531.5	127.298	127.998
532	126.996	128.133
532.5	127.274	128.283
533	127.773	128.489
533.5	127.763	128.741
534	127.887	128.63
534.5	128.123	128.756
535	128.449	128.843
535.5	128.228	129.111
536	128.346	129.059
536.5	128.631	129.138
537	128.998	129.559
537.5	128.724	129.367
538	128.96	129.6
538.5	128.851	129.333
539	129.063	129.675
539.5	129.493	129.657
540	129.684	129.957
540.5	129.57	129.801
541	129.556	130.039
541.5	129.486	129.99
542	129.63	130.034
542.5	129.868	130.095
543	129.901	130.154
543.5	130.299	130.365
544	130.094	130.46
544.5	130.424	130.15
545	129.929	130.38
545.5	130.315	130.419
546	130.411	130.47
546.5	130.627	130.887
547	130.65	130.57
547.5	130.696	130.693
548	130.72	130.719
548.5	130.914	130.927
549	130.817	130.833
549.5	130.911	130.94
550	130.828	130.983
550.5	130.973	130.747
551	131.35	130.943
551.5	131.199	131.25
552	131.388	131.321
552.5	131.155	130.925
553	131.318	131.065
553.5	131.452	131.344
554	131.406	131.25
554.5	131.433	131.337
555	131.363	131.377
555.5	131.5	131.41
556	131.691	131.296
556.5	131.555	131.824
557	131.776	131.675
557.5	131.97	131.531
558	131.747	131.617
558.5	132.065	131.663
559	132.055	131.602
559.5	132.031	131.698
560	132.151	131.771
560.5	132.041	131.874
561	132.171	132.168
561.5	132.043	131.836
562	132.218	132.183
562.5	132.244	132.104
563	131.997	131.978
563.5	132.329	131.897
564	132.233	132.03
564.5	132.378	132.134
565	132.391	131.885
565.5	132.61	132.174
566	132.216	131.96
566.5	132.511	132.103
567	132.373	131.992
567.5	132.682	132.096
568	132.809	132.243
568.5	132.648	132.286
569	132.882	132.312
569.5	132.787	132.336
570	132.59	132.269
570.5	132.72	132.426
571	132.774	132.277
571.5	132.861	132.484
572	132.894	132.479
572.5	132.722	132.461
573	132.583	132.587
573.5	133.115	132.642
574	133.11	132.708
574.5	133.028	132.644
575	132.919	132.527
575.5	132.655	132.577
576	133.161	132.91
576.5	132.975	132.783
577	133.073	132.636
577.5	132.841	132.774
578	133.013	132.451
578.5	133.203	132.604
579	133.151	132.761
579.5	133.035	132.656
580	133.067	132.751
580.5	133.221	132.708
581	133.157	132.746
581.5	133.268	132.948
582	133.298	132.846
582.5	133.246	132.651
583	133.288	132.878
583.5	133.357	132.706
584	133.099	132.83
584.5	133.25	132.836
585	133.468	132.796
585.5	133.512	132.86
586	133.176	133.079
586.5	133.379	133.013
587	133.104	132.93
587.5	133.802	133.089
588	133.357	132.856
588.5	133.221	132.781
589	133.266	132.783
589.5	133.448	133.079
590	133.549	133.186
590.5	133.576	133.065
591	133.424	132.94
591.5	133.434	133.102
592	133.33	133.003
592.5	133.473	132.997
593	133.604	132.913
593.5	133.214	133.121
594	133.539	133.129
594.5	133.604	133.327
595	133.45	133.03
595.5	133.572	133.112
596	133.534	133.024
596.5	133.483	133.029
597	133.49	133.288
597.5	133.812	133.228
598	134.006	133.367
598.5	133.623	133.029
599	133.411	133.072
599.5	133.731	133.33
600	133.52	133.037
600.5	133.847	133.342
601	133.758	133.127
601.5	133.667	133.137

## Sheet: Fig. 2B
Insulin Secretion Rate						O2 Consumption Rate
Time, min	ISR Ch1	ISR Ch2	Average	SE			OCR nmol/mL/100 Islets		Time, min	Cyt c 1	Cyt c 2	average	SE
-30	0.25	0.235	0.2425	0.0075		-30	0.437673		-62.0833	14.0567	10.6678	12.3622	1.69444
-25						-29.5	0.431909		-61.5667	13.9711	10.5422	12.2567	1.71444
-20	0.265	0.245	0.255	0.01		-29	0.433358		-61.0667	13.6333	10.8244	12.2289	1.40444
-15						-28.5	0.434622		-60.55	13.4844	11.7044	12.5944	0.89
-10	0.245	0.235	0.24	0.005		-28	0.429078		-60.05	13.7633	11.86	12.8117	0.951667
-5						-27.5	0.431987		-59.5333	13.82	11.5722	12.6961	1.12389
0	0.25	0.245	0.2475	0.0025		-27	0.432453		-59.0333	13.83	11.7156	12.7728	1.05722
5						-26.5	0.435143		-58.5167	14.0544	11.8778	12.9661	1.08833
10	1.2	0.755	0.9775	0.2225		-26	0.43152		-58.0167	13.5978	11.9144	12.7561	0.841667
15						-25.5	0.432311		-57.5	13.6278	11.0656	12.3467	1.28111
20	1.75	1.23	1.49	0.26		-25	0.427361		-56.9833	13.7144	11.7256	12.72	0.994444
25						-24.5	0.430484		-56.4833	13.6567	11.5289	12.5928	1.06389
30	1.61	1.31	1.46	0.15		-24	0.43448		-55.9667	13.9933	11.6489	12.8211	1.17222
35						-23.5	0.431068		-55.4667	14.3022	11.79	13.0461	1.25611
40	2.115	1.68	1.8975	0.2175		-23	0.431009		-54.95	14.4089	12.1156	13.2622	1.14667
45						-22.5	0.432242		-54.45	14.36	11.7789	13.0694	1.29056
50	2.46	1.845	2.1525	0.3075		-22	0.432789		-53.9333	14.5767	11.83	13.2033	1.37333
55						-21.5	0.433246		-53.4333	15.1122	11.5511	13.3317	1.78056
60	2.68	1.775	2.2275	0.4525		-21	0.426588		-52.9167	15.5967	11.91	13.7533	1.84333
65						-20.5	0.427937		-52.4167	15.91	11.55	13.73	2.18
70	2.23	1.955	2.0925	0.1375		-20	0.426757		-51.9	16.1089	11.3456	13.7272	2.38167
75						-19.5	0.430846		-51.3833	15.7178	10.9567	13.3372	2.38056
80	1.38	1.505	1.4425	0.0625		-19	0.430117		-50.8833	15.8333	11.0156	13.4244	2.40889
85						-18.5	0.428386		-50.3667	15.7989	10.1711	12.985	2.81389
90	0.915	0.74	0.8275	0.0875		-18	0.426342		-49.8667	15.92	10.5144	13.2172	2.70278
95						-17.5	0.433296		-49.35	15.6967	10.3911	13.0439	2.65278
100	0.695	0.59	0.6425	0.0525		-17	0.430889		-48.85	15.8578	10.0244	12.9411	2.91667
105						-16.5	0.428289		-48.3333	15.5522	10.2789	12.9156	2.63667
110	0.67	0.55	0.61	0.06		-16	0.427974		-47.8333	15.2389	10.3333	12.7861	2.45278
115						-15.5	0.428945		-47.3167	15.0911	10.5289	12.81	2.28111
120	0.595	0.455	0.525	0.07		-15	0.423403		-46.8167	15.4422	10.6333	13.0378	2.40444
125						-14.5	0.429043		-46.3	15.1122	10.7956	12.9539	2.15833
130	0.535	0.415	0.475	0.06		-14	0.42528		-45.8	15.8256	11.6711	13.7483	2.07722
135						-13.5	0.424276		-45.2833	15.9411	11.9611	13.9511	1.99
140	0.485	0.425	0.455	0.03		-13	0.42634		-44.7667	15.9056	11.8756	13.8906	2.015
145						-12.5	0.425165		-44.2667	15.2578	11.9344	13.5961	1.66167
150	0.41	0.365	0.3875	0.0225		-12	0.423502		-43.75	15.5322	12.1	13.8161	1.71611
155						-11.5	0.426267		-43.25	15.3956	12.2911	13.8433	1.55222
160	0.355	0.32	0.3375	0.0175		-11	0.423488		-42.7333	15.3333	11.8989	13.6161	1.71722
165						-10.5	0.424059		-42.2333	14.8156	12.0722	13.4439	1.37167
170	0.35	0.33	0.34	0.01		-10	0.424679		-41.7167	14.5622	12.0089	13.2856	1.27667
175						-9.5	0.423578		-41.2167	13.6433	11.9844	12.8139	0.829444
180	0.6425	0.445	0.54375	0.0075		-9	0.420563		-40.7	13.74	11.4489	12.5944	1.14556
185	0.8075	0.59	0.69875	0.0075		-8.5	0.42562		-40.2	13.7933	11.3989	12.5961	1.19722
190	0.96	0.6575	0.80875	0.0075		-8	0.423027		-39.6833	14.1556	11.4711	12.8133	1.34222
195	1.07	0.76	0.915	0.0075		-7.5	0.423822		-39.1667	14.17	11.0456	12.6078	1.56222
200	1.0525	0.785	0.91875	0.0075		-7	0.42118		-38.6667	14.7322	10.3844	12.5583	2.17389
205	1.065	0.6975	0.88125	0.0075		-6.5	0.42709		-38.15	14.9078	10.3189	12.6133	2.29444
210	1.09	0.73	0.91	0.0075		-6	0.421146		-37.65	14.8667	9.36778	12.1172	2.74944
215	1.16	0.763333	0.961667	0.0075		-5.5	0.418544		-37.1333	15.0322	8.77556	11.9039	3.12833
220	1.055	0.68	0.8675	0.0075		-5	0.422721		-36.6333	15.2622	8.56444	11.9133	3.34889
225						-4.5	0.418145		-36.1167	15.1956	8.57444	11.885	3.31056
230	1.12	0.8	0.96	0.0075		-4	0.419329		-35.6167	15.6144	8.25778	11.9361	3.67833
235						-3.5	0.423215		-35.1	15.5489	8.44444	11.9967	3.55222
240	1.12	0.86	0.99	0.0075		-3	0.417911		-34.6	14.9978	9.33667	12.1672	2.83056
245						-2.5	0.422596		-34.0833	14.1311	9.47222	11.8017	2.32944
250	1.02	0.95	0.985	0.0075		-2	0.421968		-33.5667	13.2844	10.34	11.8122	1.47222
255						-1.5	0.427449		-33.0667	13.89	11.1756	12.5328	1.35722
260	1.145	0.92	1.0325	0.0075		-1	0.428535		-32.55	14.0822	11.0556	12.5689	1.51333
265						-0.5	0.43752		-32.05	14.6511	11.1833	12.9172	1.73389
270	1.11	0.805	0.9575	0.0075		0	0.446004		-31.5333	14.95	11.3033	13.1267	1.82333
275						0.5	0.470196		-31.0333	14.71	11.45	13.08	1.63
280	1.025	0.74	0.8825	0.0075		1	0.505217		-30.5167	14.4411	10.8556	12.6483	1.79278
285						1.5	0.552629		-30.0167	14.7522	10.5556	12.6539	2.09833
290	1.17	0.625	0.8975	0.0075		2	0.607776		-29.5	14.6033	10.7467	12.675	1.92833
295						2.5	0.657673		-29	15.3567	10.66	13.0083	2.34833
300	1.09	0.625	0.8575	0.0075		3	0.690711		-28.4833	14.7767	10.4467	12.6117	2.165
305						3.5	0.708518		-27.9833	14.7378	10.2911	12.5144	2.22333
310	1.11	0.625	0.8675	0.0075		4	0.718158		-27.4667	14.1367	9.75222	11.9444	2.19222
315						4.5	0.724416		-26.95	13.33	9.13556	11.2328	2.09722
320	0.71	0.625	0.6675	0.0075		5	0.729761		-26.45	12.8711	9.74889	11.31	1.56111
325						5.5	0.727162		-25.9333	13.0056	10.1278	11.5667	1.43889
330	0.14	0.74	0.44	0.0075		6	0.728549		-25.4333	13.0856	9.60556	11.3456	1.74
335						6.5	0.729764		-24.9167	13.4489	9.57111	11.51	1.93889
340	0.065	0.405	0.235	0.0075		7	0.73066		-24.4167	13.1656	9.34889	11.2572	1.90833
345						7.5	0.73553		-23.9	13.6189	9.60111	11.61	2.00889
350	0.055	0.06	0.0575	0.0075		8	0.736511		-23.4	13.5367	11.07	12.3033	1.23333
355						8.5	0.742286		-22.8833	14.03	11.4878	12.7589	1.27111
360	0.06	0.06	0.06	0.0075		9	0.745653		-22.3833	14.5122	12.3367	13.4244	1.08778
365						9.5	0.746466		-21.8667	14.6256	11.8767	13.2511	1.37444
370	0.065	0.06	0.0625	0.0075		10	0.750841		-21.35	14.1978	11.8978	13.0478	1.15
375						10.5	0.748872		-20.85	13.9933	12.1256	13.0594	0.933889
380	0.1	0.06	0.08	0.0075		11	0.754568		-20.3333	14.2256	11.7222	12.9739	1.25167
385						11.5	0.759385		-19.8333	14.47	11.3978	12.9339	1.53611
390						12	0.762795		-19.3167	13.9378	11.2389	12.5883	1.34944
395						12.5	0.765264		-18.8167	14.3511	11.02	12.6856	1.66556
400						13	0.764835		-18.3	13.4089	10.95	12.1794	1.22944
405						13.5	0.77019		-17.8	13.3911	11.14	12.2656	1.12556
410						14	0.77564		-17.2833	14.0033	11.2733	12.6383	1.365
						14.5	0.77677		-16.7833	14.1011	11.06	12.5806	1.52056
						15	0.777703		-16.2667	14.4756	11.5889	13.0322	1.44333
						15.5	0.777746		-15.75	14.5844	11.6011	13.0928	1.49167
						16	0.787271		-15.25	14.1111	11.6244	12.8678	1.24333
						16.5	0.788822		-14.7333	15.1622	11.2011	13.1817	1.98056
						17	0.789107		-14.2333	15.1822	10.55	12.8661	2.31611
						17.5	0.791213		-13.7167	15.7556	10.9378	13.3467	2.40889
						18	0.79487		-13.2167	15.41	10.5822	12.9961	2.41389
0.5						18.5	0.792099		-12.7	14.6156	11.0444	12.83	1.78556
1						19	0.796858		-12.2	14.8844	11.5556	13.22	1.66444
1.5						19.5	0.801682		-11.6833	14.6133	10.3433	12.4783	2.135
2						20	0.800813		-11.1833	14.5667	10.8467	12.7067	1.86
2.5						20.5	0.802369		-10.6667	15.07	10.8511	12.9606	2.10944
3						21	0.803961		-10.1667	14.4322	11.3389	12.8856	1.54667
3.5						21.5	0.810527		-9.65	13.8111	11.2389	12.525	1.28611
4						22	0.812375		-9.13333	13.6522	10.7111	12.1817	1.47056
4.5						22.5	0.812375		-8.63333	14.0944	10.9844	12.5394	1.555
5						23	0.811244		-8.11667	14.6111	10.6489	12.63	1.98111
5.5						23.5	0.812062		-7.61667	14.3633	10.6433	12.5033	1.86
6						24	0.818938		-7.1	14.4222	11.1689	12.7956	1.62667
6.5						24.5	0.818295		-6.6	14.5278	11.0844	12.8061	1.72167
7						25	0.819516		-6.08333	14.8411	11.2922	13.0667	1.77444
7.5						25.5	0.822277		-5.58333	15.1	11.3867	13.2433	1.85667
8						26	0.823482		-5.06667	15.3856	11.5856	13.4856	1.9
8.5						26.5	0.823137		-4.56667	15.11	11.5656	13.3378	1.77222
9						27	0.827881		-4.05	14.8156	11.2111	13.0133	1.80222
9.5						27.5	0.82502		-3.55	14.29	11.2244	12.7572	1.53278
10						28	0.824994		-3.03333	15	10.7167	12.8583	2.14167
10.5						28.5	0.825909		-2.51667	14.8067	10.6167	12.7117	2.095
11						29	0.828431		-2.01667	14.8422	11.0356	12.9389	1.90333
11.5						29.5	0.828181		-1.5	14.5356	11.7844	13.16	1.37556
12						30	0.830786		-1	14.4144	11.4511	12.9328	1.48167
12.5						30.5	0.828977		-0.483333	14.8167	11.6533	13.235	1.58167
13						31	0.830054		0.0166667	15.55	11.9189	13.7344	1.81556
13.5						31.5	0.827355		0.533333	16.5244	13.1856	14.855	1.66944
14						32	0.832478		1.03333	17.69	14.7956	16.2428	1.44722
14.5						32.5	0.830722		1.55	18.3311	17.4122	17.8717	0.459444
15						33	0.833392		2.05	19.6322	19.3211	19.4767	0.155556
15.5						33.5	0.834342		2.56667	20.8733	21.1689	21.0211	0.147778
16						34	0.82951		3.08333	22.4167	22.5522	22.4844	0.0677778
16.5						34.5	0.83461		3.58333	23.5856	25.0922	24.3389	0.753333
17						35	0.835737		4.1	24.6733	26.6422	25.6578	0.984444
17.5						35.5	0.83396		4.6	26.14	28.5233	27.3317	1.19167
18						36	0.835712		5.11667	26.1822	29.3844	27.7833	1.60111
18.5						36.5	0.834857		5.61667	26.9322	29.7778	28.355	1.42278
19						37	0.839		6.13333	27.6322	29.7489	28.6906	1.05833
19.5						37.5	0.833288		6.63333	27.7733	30.3511	29.0622	1.28889
20						38	0.835323		7.15	28.2	30.2056	29.2028	1.00278
20.5						38.5	0.836216		7.65	28.3944	30.6078	29.5011	1.10667
21						39	0.835492		8.16667	28.8633	30.7122	29.7878	0.924444
21.5						39.5	0.837817		8.68333	28.85	31.2756	30.0628	1.21278
22						40	0.838773		9.18333	28.4311	31.5878	30.0094	1.57833
22.5						40.5	0.836452		9.7	29.3667	32.3511	30.8589	1.49222
23						41	0.837316		10.2	29.6844	32.4956	31.09	1.40556
23.5						41.5	0.836418		10.7167	29.9778	33.3978	31.6878	1.71
24						42	0.840708		11.2167	30.78	34.3956	32.5878	1.80778
24.5						42.5	0.837217		11.7333	30.7456	35.0056	32.8756	2.13
25						43	0.838939		12.2333	31.2789	35.0178	33.1483	1.86944
25.5						43.5	0.839195		12.75	31.8811	35.2633	33.5722	1.69111
26						44	0.838687		13.25	32.7967	35.89	34.3433	1.54667
26.5						44.5	0.837199		13.7667	33.5644	36.2344	34.8994	1.335
27						45	0.835718		14.2833	33.8467	35.7367	34.7917	0.945
27.5						45.5	0.835468		14.7833	33.8633	36.7622	35.3128	1.44944
28						46	0.835731		15.3	33.4522	36.2556	34.8539	1.40167
28.5						46.5	0.8378		15.8	33.3789	35.9256	34.6522	1.27333
29						47	0.836522		16.3167	33.6244	35.9989	34.8117	1.18722
29.5						47.5	0.837076		16.8167	32.9556	36.6456	34.8006	1.845
30						48	0.835352		17.3333	32.4422	37.3078	34.875	2.43278
30.5						48.5	0.836483		17.8333	31.7744	37.31	34.5422	2.76778
31						49	0.835918		18.35	31.5411	37.9056	34.7233	3.18222
31.5						49.5	0.837567		18.85	31.7067	38.7178	35.2122	3.50556
32						50	0.834884		19.3667	32.3744	38.4078	35.3911	3.01667
32.5						50.5	0.834892		19.8833	33.1478	38.9222	36.035	2.88722
33						51	0.835083		20.3833	33.4867	39.1189	36.3028	2.81611
33.5						51.5	0.83694		20.9	33.4678	39.1733	36.3206	2.85278
34						52	0.837529		21.4	33.93	39.2922	36.6111	2.68111
34.5						52.5	0.836315		21.9167	34.5533	39.1267	36.84	2.28667
35						53	0.838123		22.4167	34.8056	38.8622	36.8339	2.02833
35.5						53.5	0.835469		22.9333	35.1178	38.6356	36.8767	1.75889
36						54	0.832977		23.4333	35.3889	39.2478	37.3183	1.92944
36.5						54.5	0.837066		23.95	35.3322	39.2822	37.3072	1.975
37						55	0.83681		24.45	34.9944	39.2444	37.1194	2.125
37.5						55.5	0.835304		24.9667	34.9222	39.1544	37.0383	2.11611
38						56	0.834251		25.4833	34.9111	39.57	37.2406	2.32944
38.5						56.5	0.834916		25.9833	34.9656	39.2922	37.1289	2.16333
39						57	0.835346		26.5	34.9189	38.8789	36.8989	1.98
39.5						57.5	0.835927		27	35.03	39.9978	37.5139	2.48389
40						58	0.836623		27.5167	35.2267	39.7322	37.4794	2.25278
40.5						58.5	0.836494		28.0167	34.9022	39.43	37.1661	2.26389
41						59	0.832437		28.5333	34.5956	40.16	37.3778	2.78222
41.5						59.5	0.830031		29.0333	34.6233	39.9744	37.2989	2.67556
42						60	0.826787		29.55	34.4478	39.9378	37.1928	2.745
42.5						60.5	0.819494		30.05	34.7133	39.7311	37.2222	2.50889
43						61	0.809438		30.5667	34.7067	39.6444	37.1756	2.46889
43.5						61.5	0.79725		31.0833	34.8611	39.4911	37.1761	2.315
44						62	0.785774		31.5833	35.1278	38.98	37.0539	1.92611
44.5						62.5	0.775251		32.1	35.1933	40.0133	37.6033	2.41
45						63	0.76445		32.6	34.9989	40.3844	37.6917	2.69278
45.5						63.5	0.757416		33.1167	34.9178	40.4389	37.6783	2.76056
46						64	0.750853		33.6167	35.4411	40.76	38.1006	2.65944
46.5						64.5	0.745848		34.1333	34.9689	41.6089	38.2889	3.32
47						65	0.74631		34.6333	34.9144	42.2544	38.5844	3.67
47.5						65.5	0.743067		35.15	34.9378	41.7222	38.33	3.39222
48						66	0.741471		35.65	35.0578	42.3067	38.6822	3.62444
48.5						66.5	0.73497		36.1667	35.1722	42.6344	38.9033	3.73111
49						67	0.723554		36.6833	35.26	41.8867	38.5733	3.31333
49.5						67.5	0.714403		37.1833	35.5911	41.4244	38.5078	2.91667
50						68	0.704357		37.7	35.4156	40.9978	38.2067	2.79111
50.5						68.5	0.690838		38.2	34.84	41.3522	38.0961	3.25611
51						69	0.679672		38.7167	35.19	40.5156	37.8528	2.66278
51.5						69.5	0.670783		39.2167	35.1556	39.8889	37.5222	2.36667
52						70	0.6618		39.7333	34.7622	40.7833	37.7728	3.01056
52.5						70.5	0.652871		40.2333	34.8178	40.8267	37.8222	3.00444
53						71	0.644597		40.75	34.94	40.8444	37.8922	2.95222
53.5						71.5	0.638578		41.25	34.6722	41.1989	37.9356	3.26333
54						72	0.631355		41.7667	34.6911	41.3322	38.0117	3.32056
54.5						72.5	0.625561		42.2667	35.05	41.2567	38.1533	3.10333
55						73	0.619776		42.7833	35.4378	40.9778	38.2078	2.77
55.5						73.5	0.614663		43.3	35.8578	41.2978	38.5778	2.72
56						74	0.609306		43.8	36.3833	41.7222	39.0528	2.66944
56.5						74.5	0.605477		44.3167	37.1367	41.9344	39.5356	2.39889
57						75	0.600111		44.8167	36.9278	41.7778	39.3528	2.425
57.5						75.5	0.595934		45.3333	36.9422	41.9011	39.4217	2.47944
58						76	0.591812		45.8333	36.74	42.44	39.59	2.85
58.5						76.5	0.588038		46.35	36.6656	42.7767	39.7211	3.05556
59						77	0.584857		46.85	36.1833	42.4933	39.3383	3.155
59.5						77.5	0.581211		47.3667	35.9056	42.3478	39.1267	3.22111
60						78	0.577811		47.8667	35.9744	42.3156	39.145	3.17056
60.5						78.5	0.574635		48.3833	35.8467	42.0711	38.9589	3.11222
61						79	0.572006		48.9	35.5933	41.3356	38.4644	2.87111
61.5						79.5	0.569476		49.4	35.17	41.7144	38.4422	3.27222
62						80	0.565688		49.9167	34.6833	41.3311	38.0072	3.32389
62.5						80.5	0.563871		50.4167	34.9789	40.3189	37.6489	2.67
63						81	0.561016		50.9333	35.1867	39.46	37.3233	2.13667
63.5						81.5	0.558469		51.4333	35.4956	40.3278	37.9117	2.41611
64						82	0.556503		51.95	35.7756	40.4889	38.1322	2.35667
64.5						82.5	0.553483		52.45	35.9022	40.3511	38.1267	2.22444
65						83	0.551267		52.9667	35.7678	40.6233	38.1956	2.42778
65.5						83.5	0.54902		53.4667	35.7178	41.4789	38.5983	2.88056
66						84	0.547458		53.9833	35.8678	41.6078	38.7378	2.87
66.5						84.5	0.545208		54.5	36.05	41.9411	38.9956	2.94556
67						85	0.543288		55	35.6567	42.1211	38.8889	3.23222
67.5						85.5	0.5415		55.5167	35.6756	42.11	38.8928	3.21722
68						86	0.539777		56.0167	36.1711	41.5067	38.8389	2.66778
68.5						86.5	0.538087		56.5333	36.0611	41.7844	38.9228	2.86167
69						87	0.536418		57.0333	36.0322	42.0144	39.0233	2.99111
69.5						87.5	0.534954		57.55	35.7778	41.4667	38.6222	2.84444
70						88	0.533477		58.05	35.7278	41.2278	38.4778	2.75
70.5						88.5	0.532466		58.5667	35.7978	40.65	38.2239	2.42611
71						89	0.530602		59.0667	36.1022	39.9844	38.0433	1.94111
71.5						89.5	0.528909		59.5833	36.4256	40.3544	38.39	1.96444
72						90	0.528014		60.1	36.2256	40.4144	38.32	2.09444
72.5						90.5	0.526343		60.6	36.2378	40.6178	38.4278	2.19
73						91	0.52568		61.1167	36.1867	40.6233	38.405	2.21833
73.5						91.5	0.524265		61.6167	36.4333	41.1033	38.7683	2.335
74						92	0.523594		62.1333	36.9456	42.5722	39.7589	2.81333
74.5						92.5	0.521975		62.6333	37.7589	43.4522	40.6056	2.84667
75						93	0.521811		63.15	37.9789	44.8144	41.3967	3.41778
75.5						93.5	0.520139		63.65	38.6167	46.6911	42.6539	4.03722
76						94	0.519447		64.1667	40.2889	48.7289	44.5089	4.22
76.5						94.5	0.518533		64.6667	42.3	52.0733	47.1867	4.88667
77						95	0.517981		65.1833	44.4922	54.4267	49.4594	4.96722
77.5						95.5	0.516652		65.7	47.4411	57.9056	52.6733	5.23222
78						96	0.5157		66.2	50.4889	60.9033	55.6961	5.20722
78.5						96.5	0.51517		66.7167	53.7889	63.9378	58.8633	5.07444
79						97	0.5139		67.2167	56.9511	67.53	62.2406	5.28944
79.5						97.5	0.513296		67.7333	60.7544	70.7367	65.7456	4.99111
80						98	0.512177		68.2333	64.5089	73.8878	69.1983	4.68944
80.5						98.5	0.511364		68.75	67.8878	76.6444	72.2661	4.37833
81						99	0.510785		69.25	70.6256	78.5022	74.5639	3.93833
81.5						99.5	0.509964		69.7667	73.2333	80.9589	77.0961	3.86278
82						100	0.509138		70.2667	75.6722	82.57	79.1211	3.44889
82.5						100.5	0.50842		70.7833	77.6022	84.0478	80.825	3.22278
83						101	0.506538		71.2833	79.4867	85.6244	82.5556	3.06889
83.5						101.5	0.5057		71.8	81.1278	86.3711	83.7494	2.62167
84						102	0.505214		72.3167	82.8811	87.4922	85.1867	2.30556
84.5						102.5	0.504464		72.8167	83.7433	88.5933	86.1683	2.425
85						103	0.50287		73.3333	84.2089	88.8811	86.545	2.33611
85.5						103.5	0.501943		73.8333	85.7344	89.3533	87.5439	1.80944
86						104	0.501356		74.35	86.2322	90.1111	88.1717	1.93944
86.5						104.5	0.500716		74.85	86.9344	90.9956	88.965	2.03056
87						105	0.499381		75.3667	87.7278	91.9344	89.8311	2.10333
87.5						105.5	0.498235		75.8667	87.9644	91.8456	89.905	1.94056
88						106	0.497967		76.3833	88.1078	92.7922	90.45	2.34222
88.5						106.5	0.496614		76.9	88.58	93.4122	90.9961	2.41611
89						107	0.495526		77.4	89.4367	93.8978	91.6672	2.23056
89.5						107.5	0.494705		77.9167	90.1011	94.4511	92.2761	2.175
90						108	0.493734		78.4167	90.0233	94.8822	92.4528	2.42944
90.5						108.5	0.493268		78.9333	90.6644	95.61	93.1372	2.47278
91						109	0.492106		79.4333	90.7	94.9656	92.8328	2.13278
91.5						109.5	0.491605		79.95	90.6544	94.87	92.7622	2.10778
92						110	0.49085		80.45	90.8422	94.7822	92.8122	1.97
92.5						110.5	0.490395		80.9667	91.7589	95.1244	93.4417	1.68278
93						111	0.489308		81.4667	91.9833	95.1733	93.5783	1.595
93.5						111.5	0.488237		81.9833	91.9811	95.1867	93.5839	1.60278
94						112	0.486994		82.5	92.2189	95.7367	93.9778	1.75889
94.5						112.5	0.486521		83	92.7822	95.7889	94.2856	1.50333
95						113	0.485689		83.5167	92.8767	95.3367	94.1067	1.23
95.5						113.5	0.48493		84.0167	93.1211	96.1489	94.635	1.51389
96						114	0.483778		84.5333	93.2022	96.1911	94.6967	1.49444
96.5						114.5	0.483257		85.0333	94.1744	96.7567	95.4656	1.29111
97						115	0.482868		85.55	94.3711	95.9133	95.1422	0.771111
97.5						115.5	0.48199		86.05	94.4467	96.1333	95.29	0.843333
98						116	0.480907		86.5667	94.7967	95.9711	95.3839	0.587222
98.5						116.5	0.479899		87.0667	94.5922	95.5822	95.0872	0.495
99						117	0.479856		87.5833	94.1589	95.85	95.0044	0.845556
99.5						117.5	0.478364		88.1	94.1622	95.9033	95.0328	0.870556
100						118	0.478133		88.6	94.5911	95.7556	95.1733	0.582222
100.5						118.5	0.477786		89.1167	94.9633	96.34	95.6517	0.688333
101						119	0.476797		89.6167	94.6078	96.2122	95.41	0.802222
101.5						119.5	0.476062		90.1333	94.3289	96.5889	95.4589	1.13
102						120	0.475825		90.6333	94.3789	96.2978	95.3383	0.959444
102.5						120.5	0.47448		91.15	94.2911	96.4022	95.3467	1.05556
103						121	0.473908		91.65	94.2656	96.4678	95.3667	1.10111
103.5						121.5	0.473551		92.1667	94.6389	96.4556	95.5472	0.908333
104						122	0.472803		92.6667	94.9556	96.6111	95.7833	0.827778
104.5						122.5	0.471924		93.1833	94.6322	96.3822	95.5072	0.875
105						123	0.471408		93.7	94.7011	96.1856	95.4433	0.742222
105.5						123.5	0.470771		94.2	94.8389	96.1278	95.4833	0.644444
106						124	0.470311		94.7167	95.2611	95.8944	95.5778	0.316667
106.5						124.5	0.469341		95.2167	95.3767	96.1522	95.7644	0.387778
107						125	0.468478		95.7333	95.4433	96.4133	95.9283	0.485
107.5						125.5	0.468257		96.2333	96.0011	96.7722	96.3867	0.385556
108						126	0.467701		96.75	95.7911	97.1533	96.4722	0.681111
108.5						126.5	0.466642		97.25	95.7156	97.0567	96.3861	0.670556
109						127	0.466534		97.7667	96.1578	97.2944	96.7261	0.568333
109.5						127.5	0.465434		98.2667	96.0578	96.9367	96.4972	0.439444
110						128	0.46498		98.7833	95.91	97.5344	96.7222	0.812222
110.5						128.5	0.464532		99.3	95.6667	97.7878	96.7272	1.06056
111						129	0.463608		99.8	96.13	97.6289	96.8794	0.749444
111.5						129.5	0.46342		100.317	96.4189	98.1678	97.2933	0.874444
112						130	0.462595		100.817	96.2378	98.2878	97.2628	1.025
112.5						130.5	0.461651		101.333	96.5267	97.8022	97.1644	0.637778
113						131	0.461864		101.833	96.24	98.1244	97.1822	0.942222
113.5						131.5	0.461458		102.35	96.1967	98.5778	97.3872	1.19056
114						132	0.461031		102.85	96.2356	99.1111	97.6733	1.43778
114.5						132.5	0.460686		103.367	96.4756	98.7578	97.6167	1.14111
115						133	0.460354		103.867	96.4244	98.7833	97.6039	1.17944
115.5						133.5	0.459352		104.383	96.1344	98.9389	97.5367	1.40222
116						134	0.459308		104.883	95.96	97.7656	96.8628	0.902778
116.5						134.5	0.458742		105.4	96.0167	97.8211	96.9189	0.902222
117						135	0.457932		105.917	96.3967	98.2189	97.3078	0.911111
117.5						135.5	0.458201		106.417	96.9522	98.4878	97.72	0.767778
118						136	0.457411		106.933	96.9378	97.8433	97.3906	0.452778
118.5						136.5	0.4568		107.433	97.0133	97.2856	97.1494	0.136111
119						137	0.456678		107.95	96.8656	97.6333	97.2494	0.383889
119.5						137.5	0.455706		108.45	97.4022	98.1222	97.7622	0.36
120						138	0.455517		108.967	97.6244	97.91	97.7672	0.142778
120.5						138.5	0.454779		109.467	97.4533	98.9044	98.1789	0.725556
121						139	0.454323		109.983	97.6133	98.6089	98.1111	0.497778
121.5						139.5	0.453947		110.5	97.4278	98.8689	98.1483	0.720556
122						140	0.453338		111	97.6156	98.4622	98.0389	0.423333
122.5						140.5	0.453328		111.517	97.5622	99.0344	98.2983	0.736111
123						141	0.452461		112.017	97.5889	99.1989	98.3939	0.805
123.5						141.5	0.452305		112.533	97.6556	98.5422	98.0989	0.443333
124						142	0.452288		113.033	97.3789	98.2344	97.8067	0.427778
124.5						142.5	0.451402		113.55	97.4356	98.5078	97.9717	0.536111
125						143	0.451416		114.05	97.2567	98.0822	97.6694	0.412778
125.5						143.5	0.451249		114.567	97.3667	98.2978	97.8322	0.465556
126						144	0.450607		115.067	97.5456	98.0167	97.7811	0.235556
126.5						144.5	0.450307		115.583	97.5356	98.2478	97.8917	0.356111
127						145	0.449453		116.1	97.4178	97.3789	97.3983	0.0194444
127.5						145.5	0.449178		116.6	97.3867	97.6533	97.52	0.133333
128						146	0.449191		117.117	97.0844	98.4067	97.7456	0.661111
128.5						146.5	0.449384		117.617	97.0589	98.0611	97.56	0.501111
129						147	0.448609		118.133	97.1078	98.1789	97.6433	0.535556
129.5						147.5	0.448303		118.633	96.9611	98.2033	97.5822	0.621111
130						148	0.447895		119.15	96.9944	97.9411	97.4678	0.473333
130.5						148.5	0.447519		119.65	96.7178	98.3811	97.5494	0.831667
131						149	0.447759		120.167	96.1833	98.5144	97.3489	1.16556
131.5						149.5	0.446662		120.667	96.5656	99.2833	97.9244	1.35889
132						150	0.446588		121.183	96.7878	99.1178	97.9528	1.165
132.5						150.5	0.446783		121.683	97.0089	98.8178	97.9133	0.904444
133						151	0.446527		122.2	96.9789	99.1944	98.0867	1.10778
133.5						151.5	0.445969		122.717	96.6733	98.8089	97.7411	1.06778
134						152	0.445597		123.217	97.3033	98.7767	98.04	0.736667
134.5						152.5	0.445602		123.733	97.1844	99.1367	98.1606	0.976111
135						153	0.445005		124.233	97.0856	98.72	97.9028	0.817222
135.5						153.5	0.445079		124.75	97.7922	98.4056	98.0989	0.306667
136						154	0.444599		125.25	97.8211	98.5089	98.165	0.343889
136.5						154.5	0.444154		125.767	97.8911	98.6989	98.295	0.403889
137						155	0.444347		126.267	98.6911	98.9378	98.8144	0.123333
137.5						155.5	0.443562		126.783	99.0033	98.7522	98.8778	0.125556
138						156	0.443293		127.283	98.8222	98.9378	98.88	0.0577778
138.5						156.5	0.442954		127.8	98.6789	98.3311	98.505	0.173889
139						157	0.442415		128.317	98.5067	98.4978	98.5022	0.00444444
139.5						157.5	0.442694		128.817	99.0256	98.1978	98.6117	0.413889
140						158	0.441993		129.333	98.7311	98.2067	98.4689	0.262222
140.5						158.5	0.441818		129.833	98.7678	97.7167	98.2422	0.525556
141						159	0.441297		130.35	98.7067	97.9444	98.3256	0.381111
141.5						159.5	0.441274		130.85	98.1289	97.6222	97.8756	0.253333
142						160	0.441077		131.367	97.4344	97.6856	97.56	0.125556
142.5						160.5	0.440398		131.867	97.8956	97.25	97.5728	0.322778
143						161	0.440651		132.383	97.8567	97.69	97.7733	0.0833333
143.5						161.5	0.439901		132.883	98.4489	97.4756	97.9622	0.486667
144						162	0.440073		133.4	97.9589	97.3289	97.6439	0.315
144.5						162.5	0.439249		133.917	97.4989	97.5567	97.5278	0.0288889
145						163	0.438587		134.417	97.1811	97.8967	97.5389	0.357778
145.5						163.5	0.438017		134.933	97.3233	98.1456	97.7344	0.411111
146						164	0.43832		135.433	97.2744	98.3978	97.8361	0.561667
146.5						164.5	0.437826		135.95	98.0022	98.6978	98.35	0.347778
147						165	0.437475		136.45	97.9756	99.2656	98.6206	0.645
147.5						165.5	0.436986		136.967	97.7111	99.4122	98.5617	0.850556
148						166	0.436786		137.467	97.48	99.0511	98.2656	0.785556
148.5						166.5	0.437163		137.983	97.8633	99.2022	98.5328	0.669444
149						167	0.4366		138.483	98.6633	99.0056	98.8344	0.171111
149.5						167.5	0.436513		139	98.9889	98.9378	98.9633	0.0255556
150						168	0.436342		139.517	99.31	98.6856	98.9978	0.312222
150.5						168.5	0.435602		140.017	98.9244	98.4722	98.6983	0.226111
151						169	0.435636		140.533	98.7644	98.4656	98.615	0.149444
151.5						169.5	0.435785		141.033	99.2156	98.3033	98.7594	0.456111
152						170	0.435316		141.55	99.3844	98.3789	98.8817	0.502778
152.5						170.5	0.434901		142.05	99.4978	99.1711	99.3344	0.163333
153						171	0.434334		142.567	99.6722	99.7556	99.7139	0.0416667
153.5						171.5	0.434485		143.067	99.6478	100.324	99.9861	0.338333
154						172	0.43431		143.583	99.8722	99.9289	99.9006	0.0283333
154.5						172.5	0.43395		144.083	99.7289	99.6478	99.6883	0.0405556
155						173	0.433459		144.6	100.19	100.261	100.226	0.0355556
155.5						173.5	0.433223		145.117	100.393	99.9278	100.161	0.232778
156						174	0.432533		145.617	100.338	99.9322	100.135	0.202778
156.5						174.5	0.432741		146.133	100.462	99.7967	100.129	0.332778
157						175	0.432184		146.633	100.608	99.5667	100.087	0.520556
157.5						175.5	0.431925		147.15	100.536	99.6811	100.108	0.427222
158						176	0.431792		147.65	99.9211	99.7033	99.8122	0.108889
158.5						176.5	0.431351		148.167	99.4022	99.6533	99.5278	0.125556
159						177	0.430983		148.667	99.5167	99.8889	99.7028	0.186111
159.5						177.5	0.430709		149.183	99.5067	99.8289	99.6678	0.161111
160						178	0.430455		149.683	99.3944	99.9111	99.6528	0.258333
160.5						178.5	0.430325		150.2	99.16	100.666	99.9128	0.752778
161						179	0.429951		150.717	99.3667	100.801	100.084	0.717222
161.5						179.5	0.429823		151.217	99.2956	100.116	99.7056	0.41
162						180	0.43005		151.733	99.0344	99.3867	99.2106	0.176111
162.5						180.5	0.431794		152.233	99.3811	99.3833	99.3822	0.00111111
163						181	0.436025		152.75	99.5444	100.108	99.8261	0.281667
163.5						181.5	0.444406		153.25	99.0167	99.5511	99.2839	0.267222
164						182	0.458733		153.767	99.0956	99.1244	99.11	0.0144444
164.5						182.5	0.478595		154.267	99.2222	99.0733	99.1478	0.0744444
165						183	0.506235		154.783	99.06	98.4811	98.7706	0.289444
165.5						183.5	0.538008		155.283	99.32	98.3989	98.8594	0.460556
166						184	0.573453		155.8	99.3567	98.9967	99.1767	0.18
166.5						184.5	0.608241		156.3	99.7722	99.59	99.6811	0.0911111
167						185	0.637601		156.817	100.414	98.8889	99.6517	0.762778
167.5						185.5	0.660321		157.333	100.71	98.09	99.4	1.31
168						186	0.67646		157.833	101.203	98.6067	99.905	1.29833
168.5						186.5	0.685028		158.35	101.628	99.1122	100.37	1.25778
169						187	0.682453		158.85	101.348	98.9044	100.126	1.22167
169.5						187.5	0.671595		159.367	101.619	99.4811	100.55	1.06889
170						188	0.658088		159.867	101.339	100.018	100.678	0.660556
170.5						188.5	0.641027		160.383	101.019	99.6467	100.333	0.686111
171						189	0.629192		160.883	100.897	99.2778	100.087	0.809444
171.5						189.5	0.617798		161.4	100.479	99.6833	100.081	0.397778
172						190	0.607673		161.917	100.284	100.578	100.431	0.146667
172.5						190.5	0.598391		162.417	100.313	100.533	100.423	0.11
173						191	0.593616		162.933	100.281	100.206	100.243	0.0377778
173.5						191.5	0.588102		163.433	100.072	100.183	100.128	0.0555556
174						192	0.582129		163.95	99.7	99.7533	99.7267	0.0266667
174.5						192.5	0.574328		164.45	99.5944	99.0133	99.3039	0.290556
175						193	0.570437		164.967	99.6911	99.2011	99.4461	0.245
175.5						193.5	0.564793		165.467	100.03	99.1911	99.6106	0.419444
176						194	0.566471		165.983	100.024	98.5544	99.2894	0.735
176.5						194.5	0.565138		166.483	100.088	98.4767	99.2822	0.805556
177						195	0.56107		167	100.248	98.0556	99.1517	1.09611
177.5						195.5	0.559405		167.5	99.9522	97.7389	98.8456	1.10667
178						196	0.55535		168.017	99.9233	98.0956	99.0094	0.913889
178.5						196.5	0.551571		168.533	99.9678	97.9289	98.9483	1.01944
179						197	0.547263		169.033	100.207	98.4911	99.3489	0.857778
179.5						197.5	0.542096		169.55	100.256	98.8133	99.5344	0.721111
180						198	0.538718		170.05	99.1944	98.5478	98.8711	0.323333
180.5						198.5	0.538032		170.567	99.3489	99.3211	99.335	0.0138889
181						199	0.537108		171.067	99.3456	99.6689	99.5072	0.161667
181.5						199.5	0.533		171.583	98.54	99.8011	99.1706	0.630556
182						200	0.534216		172.083	98.4533	100.101	99.2772	0.823889
182.5						200.5	0.530426		172.6	98.81	100.487	99.6483	0.838333
183						201	0.530681		173.1	99.0533	100.242	99.6478	0.594444
183.5						201.5	0.5312		173.617	98.7778	99.2444	99.0111	0.233333
184						202	0.526938		174.133	99.1544	99.1822	99.1683	0.0138889
184.5						202.5	0.526616		174.633	99.7756	99.4044	99.59	0.185556
185						203	0.530939		175.15	99.2333	99.6067	99.42	0.186667
185.5						203.5	0.524473		175.65	98.8756	99.2944	99.085	0.209444
186						204	0.526682		176.167	99.3022	99.2556	99.2789	0.0233333
186.5						204.5	0.527453		176.667	98.95	98.52	98.735	0.215
187						205	0.52578		177.183	98.72	98.9411	98.8306	0.110556
187.5						205.5	0.528801		177.683	98.8233	99.57	99.1967	0.373333
188						206	0.52951		178.2	99.2167	100.266	99.7411	0.524444
188.5						206.5	0.526143		178.7	98.9333	99.9111	99.4222	0.488889
189						207	0.524859		179.217	98.8733	99.6378	99.2556	0.382222
189.5						207.5	0.52507		179.717	99.2711	99.1633	99.2172	0.0538889
190						208	0.526148		180.233	99.6444	99.1256	99.385	0.259444
190.5						208.5	0.52449		180.75	99.3556	98.8444	99.1	0.255556
191						209	0.525309		181.25	100.031	99.6989	99.865	0.166111
191.5						209.5	0.525223		181.767	100.242	99.1856	99.7139	0.528333
192						210	0.521864		182.267	100.501	98.7622	99.6317	0.869444
192.5						210.5	0.522843		182.783	100.038	98.8089	99.4233	0.614444
193						211	0.52075		183.283	99.5822	98.3856	98.9839	0.598333
193.5						211.5	0.520412		183.8	98.3022	98.2167	98.2594	0.0427778
194						212	0.523422		184.3	96.4611	96.65	96.5556	0.0944444
194.5						212.5	0.522073		184.817	93.0644	94.4656	93.765	0.700556
195						213	0.5234		185.317	88.7	91.9378	90.3189	1.61889
195.5						213.5	0.520628		185.833	82.6544	88.0589	85.3567	2.70222
196						214	0.520104		186.35	76.0911	83.0956	79.5933	3.50222
196.5						214.5	0.518184		186.85	68.6478	77.52	73.0839	4.43611
197						215	0.52036		187.367	61.4144	71.4122	66.4133	4.99889
197.5						215.5	0.51769		187.867	53.9656	65.0256	59.4956	5.53
198						216	0.518515		188.383	47.6456	57.8811	52.7633	5.11778
198.5						216.5	0.521225		188.883	41.4367	50.9444	46.1906	4.75389
199						217	0.518369		189.4	36.6356	44.2322	40.4339	3.79833
199.5						217.5	0.515602		189.9	33.0989	38.6567	35.8778	2.77889
200						218	0.51646		190.417	30.5022	33.0478	31.775	1.27278
200.5						218.5	0.518346		190.917	28.6744	28.8256	28.75	0.0755556
201						219	0.517416		191.433	27.0244	24.7278	25.8761	1.14833
201.5						219.5	0.515072		191.95	26.1356	20.8378	23.4867	2.64889
202						220	0.514353		192.45	25.0822	18.0967	21.5894	3.49278
202.5						220.5	0.515054		192.967	24.3944	16.2244	20.3094	4.085
203						221	0.513556		193.467	24.3089	15.3956	19.8522	4.45667
203.5						221.5	0.516816		193.983	23.9067	14.6044	19.2556	4.65111
204						222	0.513211		194.483	23.7378	13.6989	18.7183	5.01944
204.5						222.5	0.515033		195	24.0911	12.9233	18.5072	5.58389
205						223	0.518663		195.5	23.5767	12.4633	18.02	5.55667
205.5						223.5	0.515193		196.017	23.5211	12.6611	18.0911	5.43
206						224	0.518719		196.517	23.7856	13.0178	18.4017	5.38389
206.5						224.5	0.519598		197.033	24.4944	13.3978	18.9461	5.54833
207						225	0.518845		197.533	24.4378	13.2556	18.8467	5.59111
207.5						225.5	0.516645		198.05	24.3144	12.94	18.6272	5.68722
208						226	0.515076		198.567	24.36	12.5922	18.4761	5.88389
208.5						226.5	0.517152		199.067	24.62	12.4989	18.5594	6.06056
209						227	0.514202		199.583	24.0733	12.5044	18.2889	5.78444
209.5						227.5	0.515686		200.083	24.6889	11.8611	18.275	6.41389
210						228	0.520085		200.6	25.0267	11.9644	18.4956	6.53111
210.5						228.5	0.518324		201.1	24.9344	11.7056	18.32	6.61444
211						229	0.514769		201.617	24.5522	11.3022	17.9272	6.625
211.5						229.5	0.518701		202.117	24.5511	11.8378	18.1944	6.35667
212						230	0.51531		202.633	24.1133	11.74	17.9267	6.18667
212.5						230.5	0.517036		203.133	23.9322	11.7089	17.8206	6.11167
213						231	0.514017		203.65	23.6678	11.4533	17.5606	6.10722
213.5						231.5	0.516683		204.167	23.8144	11.8211	17.8178	5.99667
214						232	0.51643		204.667	22.8878	11.8811	17.3844	5.50333
214.5						232.5	0.51693		205.183	22.6456	11.5044	17.075	5.57056
215						233	0.518352		205.683	22.5478	11.6456	17.0967	5.45111
215.5						233.5	0.517021		206.2	22.4367	11.5033	16.97	5.46667
216						234	0.519388		206.7	22.2767	11.2456	16.7611	5.51556
216.5						234.5	0.517326		207.217	22.0911	11.5967	16.8439	5.24722
217						235	0.517057		207.717	21.5544	11.5389	16.5467	5.00778
217.5						235.5	0.517759		208.233	21.1211	11.6722	16.3967	4.72444
218						236	0.519611		208.733	20.7322	11.2878	16.01	4.72222
218.5						236.5	0.512546		209.25	21.5444	11.3	16.4222	5.12222
219						237	0.515563		209.75	21.53	11.5144	16.5222	5.00778
219.5						237.5	0.514037		210.267	21.2833	11.6689	16.4761	4.80722
220						238	0.514444		210.783	21.4522	11.6622	16.5572	4.895
220.5						238.5	0.513738		211.283	21.7956	10.9389	16.3672	5.42833
221						239	0.514122		211.8	22.2511	10.5856	16.4183	5.83278
221.5						239.5	0.519148		212.3	22.6556	10.4889	16.5722	6.08333
222						240	0.518789		212.817	22.7789	10.3556	16.5672	6.21167
222.5						240.5	0.516218		213.317	23.2511	10.4867	16.8689	6.38222
223						241	0.517236		213.833	23.2933	11.0378	17.1656	6.12778
223.5						241.5	0.516798		214.333	23.5156	10.6589	17.0872	6.42833
224						242	0.516662		214.85	23.5678	10.4756	17.0217	6.54611
224.5						242.5	0.521547		215.35	23.5222	10.5522	17.0372	6.485
225						243	0.516089		215.867	22.9989	10.9856	16.9922	6.00667
225.5						243.5	0.520158		216.383	22.9233	10.9833	16.9533	5.97
226						244	0.519459		216.883	23.0078	11.6289	17.3183	5.68944
226.5						244.5	0.520533		217.4	23.4678	11.5478	17.5078	5.96
227						245	0.516901		217.9	23.6567	11.8522	17.7544	5.90222
227.5						245.5	0.515555		218.417	23.45	11.17	17.31	6.14
228						246	0.5197		218.917	22.9378	11.4989	17.2183	5.71944
228.5						246.5	0.519405		219.433	22.9411	11.3544	17.1478	5.79333
229						247	0.518208		219.933	22.9978	11.6589	17.3283	5.66944
229.5						247.5	0.513634		220.45	22.8689	11.7767	17.3228	5.54611
230						248	0.5222		220.95	23.0089	11.6622	17.3356	5.67333
230.5						248.5	0.517229		221.467	23.0867	11.2622	17.1744	5.91222
231						249	0.517593		221.983	22.8856	11.4511	17.1683	5.71722
231.5						249.5	0.518619		222.483	22.5989	11.1422	16.8706	5.72833
232						250	0.517085		223	22.8711	11.2822	17.0767	5.79444
232.5						250.5	0.519128		223.5	23.51	10.8811	17.1956	6.31444
233						251	0.520505		224.017	23.4144	11.2522	17.3333	6.08111
233.5						251.5	0.522924		224.517	23.1567	10.6533	16.905	6.25167
234						252	0.521397		225.033	23.1633	10.2944	16.7289	6.43444
234.5						252.5	0.518975		225.533	22.8567	10.24	16.5483	6.30833
235						253	0.518554		226.05	22.8089	9.83556	16.3222	6.48667
235.5						253.5	0.519233		226.55	22.4167	9.51667	15.9667	6.45
236						254	0.520762		227.067	21.8911	9.42333	15.6572	6.23389
236.5						254.5	0.520458		227.567	21.5444	9.27333	15.4089	6.13556
237						255	0.521957		228.083	21.4178	9.66889	15.5433	5.87444
237.5						255.5	0.520653		228.6	21.56	9.63	15.595	5.965
238						256	0.517237		229.1	21.6756	9.73667	15.7061	5.96944
238.5						256.5	0.524436		229.617	21.9189	9.93889	15.9289	5.99
239						257	0.518944		230.117	21.9111	10.2811	16.0961	5.815
239.5						257.5	0.51833		230.633	21.8911	10.3244	16.1078	5.78333
240						258	0.520864		231.133	21.9067	10.83	16.3683	5.53833
240.5						258.5	0.5218		231.65	21.8522	10.9178	16.385	5.46722
241						259	0.518597		232.15	21.8189	11.2967	16.5578	5.26111
241.5						259.5	0.521239		232.667	21.2256	10.8578	16.0417	5.18389
242						260	0.521476		233.167	21.39	10.3467	15.8683	5.52167
242.5						260.5	0.51874		233.683	21.0878	9.86778	15.4778	5.61
243						261	0.517234		234.2	20.8867	9.79333	15.34	5.54667
243.5						261.5	0.523227		234.7	20.5867	9.61111	15.0989	5.48778
244						262	0.520851		235.217	20.7356	9.86222	15.2989	5.43667
244.5						262.5	0.523555		235.717	21.1356	9.56111	15.3483	5.78722
245						263	0.521633		236.233	21.6544	9.75333	15.7039	5.95056
245.5						263.5	0.522344		236.733	21.6456	9.77111	15.7083	5.93722
246						264	0.520939		237.25	22.3789	9.62111	16	6.37889
246.5						264.5	0.520434		237.75	22.0922	9.44667	15.7694	6.32278
247						265	0.52116		238.267	22.2456	9.78889	16.0172	6.22833
247.5						265.5	0.522532		238.767	22.0744	9.89111	15.9828	6.09167
248						266	0.523339		239.283	22.3622	9.51667	15.9394	6.42278
248.5						266.5	0.526572		239.783	21.9789	9.50667	15.7428	6.23611
249						267	0.525391		240.3	22.0678	9.68778	15.8778	6.19
249.5						267.5	0.522668		240.817	22.1022	9.27556	15.6889	6.41333
250						268	0.524226		241.317	22.2933	9.30333	15.7983	6.495
250.5						268.5	0.526442		241.833	21.7267	9.51444	15.6206	6.10611
251						269	0.519411		242.333	21.5044	10.0444	15.7744	5.73
251.5						269.5	0.52223		242.85	21.7622	10.4611	16.1117	5.65056
252						270	0.520457		243.35	21.9144	10.9111	16.4128	5.50167
252.5						270.5	0.521679		243.867	21.6356	11.2822	16.4589	5.17667
253						271	0.522743		244.367	21.7989	11.1156	16.4572	5.34167
253.5						271.5	0.525204		244.883	21.2244	10.4956	15.86	5.36444
254						272	0.52319		245.383	20.8089	10.7233	15.7661	5.04278
254.5						272.5	0.52223		245.9	20.9289	10.2544	15.5917	5.33722
255						273	0.525584		246.417	21.03	10.8256	15.9278	5.10222
255.5						273.5	0.521738		246.917	21.7822	10.2778	16.03	5.75222
256						274	0.524433		247.433	21.4756	10.0144	15.745	5.73056
256.5						274.5	0.525152		247.933	21.7389	9.51	15.6244	6.11444
257						275	0.524812		248.45	22.0156	9.19667	15.6061	6.40944
257.5						275.5	0.528287		248.95	22.6144	9.59222	16.1033	6.51111
258						276	0.530188		249.467	22.4722	10.1478	16.31	6.16222
258.5						276.5	0.527991		249.967	22.5	10.4433	16.4717	6.02833
259						277	0.525902		250.483	22.4067	10.38	16.3933	6.01333
259.5						277.5	0.528937		250.983	22.4511	10.1367	16.2939	6.15722
260						278	0.526396		251.5	21.4622	10.8478	16.155	5.30722
260.5						278.5	0.525398		252.017	21.0956	11.2211	16.1583	4.93722
261						279	0.529276		252.517	20.9489	11.5067	16.2278	4.72111
261.5						279.5	0.52806		253.033	20.6467	11.6456	16.1461	4.50056
262						280	0.530327		253.533	20.1111	11.9011	16.0061	4.105
262.5						280.5	0.52948		254.05	19.8967	11.81	15.8533	4.04333
263						281	0.527927		254.55	20.3444	11.0767	15.7106	4.63389
263.5						281.5	0.526065		255.067	19.7622	11.2367	15.4994	4.26278
264						282	0.525698		255.567	19.7733	11.6578	15.7156	4.05778
264.5						282.5	0.530756		256.083	20.2256	11.2467	15.7361	4.48944
265						283	0.524931		256.583	20.7033	11.1256	15.9144	4.78889
265.5						283.5	0.526098		257.1	20.6044	10.3656	15.485	5.11944
266						284	0.529808		257.617	20.8589	10.5589	15.7089	5.15
266.5						284.5	0.526816		258.117	21.2389	10.4656	15.8522	5.38667
267						285	0.526382		258.633	21.8844	10.2133	16.0489	5.83556
267.5						285.5	0.527062		259.133	21.6211	10.2689	15.945	5.67611
268						286	0.528314		259.65	21.6678	10.8189	16.2433	5.42444
268.5						286.5	0.532029		260.15	21.4044	9.65111	15.5278	5.87667
269						287	0.530984		260.667	21.2889	9.43333	15.3611	5.92778
269.5						287.5	0.532848		261.167	21.4967	8.91333	15.205	6.29167
270						288	0.531431		261.683	21.8867	9.33667	15.6117	6.275
270.5						288.5	0.531361		262.183	21.6289	9.75556	15.6922	5.93667
271						289	0.532656		262.7	21.1467	8.77333	14.96	6.18667
271.5						289.5	0.532979		263.2	20.9778	8.51556	14.7467	6.23111
272						290	0.532798		263.717	20.86	8.59556	14.7278	6.13222
272.5						290.5	0.5302		264.233	21.2622	8.10444	14.6833	6.57889
273						291	0.533068		264.733	21.3289	8.11778	14.7233	6.60556
273.5						291.5	0.531409		265.25	21.3267	8.04889	14.6878	6.63889
274						292	0.535386		265.75	21.4856	7.81889	14.6522	6.83333
274.5						292.5	0.528982		266.267	21.0189	8.02889	14.5239	6.495
275						293	0.530383		266.767	21.1533	7.25222	14.2028	6.95056
275.5						293.5	0.532321		267.283	21.2978	7.99444	14.6461	6.65167
276						294	0.534758		267.783	21.5056	8.52444	15.015	6.49056
276.5						294.5	0.534317		268.3	21.9267	9.17778	15.5522	6.37444
277						295	0.530578		268.8	21.7511	9.38889	15.57	6.18111
277.5						295.5	0.532682		269.317	22.14	9.95556	16.0478	6.09222
278						296	0.534733		269.833	22.2878	10.3456	16.3167	5.97111
278.5						296.5	0.532732		270.333	22.0811	10.8133	16.4472	5.63389
279						297	0.533565		270.85	22.33	10.3956	16.3628	5.96722
279.5						297.5	0.532869		271.35	22.3733	10.9167	16.645	5.72833
280						298	0.534832		271.867	22.4044	10.7456	16.575	5.82944
280.5						298.5	0.535023		272.367	22.32	11.0444	16.6822	5.63778
281						299	0.534109		272.883	22.3522	10.9433	16.6478	5.70444
281.5						299.5	0.536473		273.383	22.6456	10.5411	16.5933	6.05222
282						300	0.534317		273.9	22.3222	10.3722	16.3472	5.975
282.5									274.4	22.3378	10.7844	16.5611	5.77667
283									274.917	22.2344	10.8889	16.5617	5.67278
283.5									275.433	21.9822	11.1044	16.5433	5.43889
284									275.933	21.9844	10.5044	16.2444	5.74
284.5									276.45	21.9144	9.91667	15.9156	5.99889
285									276.95	21.8689	9.14889	15.5089	6.36
285.5									277.467	21.5389	8.80667	15.1728	6.36611
286									277.967	21.4922	9.35333	15.4228	6.06944
286.5									278.483	21.7144	9.14222	15.4283	6.28611
287									278.983	21.4222	8.38889	14.9056	6.51667
287.5									279.5	21.5678	7.49889	14.5333	7.03444
288									280	22.5144	7.27778	14.8961	7.61833
288.5									280.517	22.7333	7.51333	15.1233	7.61
289									281.017	22.5078	8.30889	15.4083	7.09944
289.5									281.533	22.4378	8.28778	15.3628	7.075
290									282.05	22.5778	8.23778	15.4078	7.17
290.5									282.55	22.1911	7.71444	14.9528	7.23833
291									283.067	21.9956	7.88222	14.9389	7.05667
291.5									283.567	22.2133	8.54778	15.3806	6.83278
292									284.083	22.0922	9.23556	15.6639	6.42833
292.5									284.583	21.6444	9.05889	15.3517	6.29278
293									285.1	21.7322	9.16111	15.4467	6.28556
293.5									285.6	21.9967	8.58222	15.2894	6.70722
294									286.117	21.85	8.50333	15.1767	6.67333
294.5									286.617	21.6833	8.18889	14.9361	6.74722
295									287.133	21.8456	8.87889	15.3622	6.48333
295.5									287.65	21.8933	8.95	15.4217	6.47167
296									288.15	22.15	8.32778	15.2389	6.91111
296.5									288.667	22	8.3	15.15	6.85
297									289.167	21.96	8.35111	15.1556	6.80444
297.5									289.683	21.7911	8.39556	15.0933	6.69778
298									290.183	21.8367	8.49111	15.1639	6.67278
298.5									290.7	22.3456	8.96556	15.6556	6.69
299									291.2	22.2911	8.76667	15.5289	6.76222
299.5									291.717	22.4833	8.85889	15.6711	6.81222
300									292.217	22.8267	8.94333	15.885	6.94167
300.5									292.733	22.7678	9.43	16.0989	6.66889
301									293.233	23.2311	9.56222	16.3967	6.83444
301.5									293.75	23.1167	9.86222	16.4894	6.62722
302									294.267	23.3767	9.85778	16.6172	6.75944
302.5									294.767	23.4022	9.49222	16.4472	6.955
303									295.283	22.76	9.40889	16.0844	6.67556
303.5									295.783	22.92	9.82111	16.3706	6.54944
304									296.3	22.7156	8.51889	15.6172	7.09833
304.5									296.8	22.49	8.36778	15.4289	7.06111
305									297.317	22.0167	8.43444	15.2256	6.79111
305.5									297.817	21.5133	8.83778	15.1756	6.33778
306									298.333	21.6233	8.42222	15.0228	6.60056
306.5									298.833	21.4078	8.69	15.0489	6.35889
307									299.35	21.2889	9.59556	15.4422	5.84667
307.5									299.867	21.4433	9.5	15.4717	5.97167
308									300.367	21.6889	9.51333	15.6011	6.08778
308.5									300.883	21.6278	10.6444	16.1361	5.49167
309									301.383	21.5033	10.6656	16.0844	5.41889
309.5									301.9	21.8144	10.7367	16.2756	5.53889
310									302.4	21.8411	10.1456	15.9933	5.84778
310.5									302.917	21.8356	10.6144	16.225	5.61056
311									303.417	21.6789	9.85889	15.7689	5.91
311.5									303.933	21.8278	9.41778	15.6228	6.205
312									304.433	22.0922	8.96	15.5261	6.56611
312.5									304.95	21.6378	9.30444	15.4711	6.16667
313									305.467	21.6767	8.83667	15.2567	6.42
313.5									305.967	21.88	8.67889	15.2794	6.60056
314									306.483	22.3644	7.90111	15.1328	7.23167
314.5									306.983	22.54	7.63	15.085	7.455
315									307.5	21.8089	7.18556	14.4972	7.31167
315.5									308	21.5489	6.73333	14.1411	7.40778
316									308.517	20.58	5.79667	13.1883	7.39167
316.5									309.017	19.3078	5.52111	12.4144	6.89333
317									309.533	17.8667	4.16222	11.0144	6.85222
317.5									310.05	15.9911	2.97556	9.48333	6.50778
318									310.55	14.2233	2.37556	8.29944	5.92389
318.5									311.067	11.9233	1.77	6.84667	5.07667
319									311.567	9.56444	0.921111	5.24278	4.32167
319.5									312.083	7.78111	-0.276667	3.75222	4.02889
320									312.583	5.68222	-0.975556	2.35333	3.32889
320.5									313.1	4.33556	-1.47222	1.43167	2.90389
321									313.6	3.15444	-1.82111	0.666667	2.48778
321.5									314.117	2.22667	-1.56444	0.331111	1.89556
322									314.617	1.49778	-0.858889	0.319444	1.17833
322.5									315.133	0.721111	-0.581111	0.07	0.651111
323									315.633	-0.07	-1.52778	-0.798889	0.728889
323.5									316.15	-0.18	-1.03333	-0.606667	0.426667
324									316.667	-0.57	-0.774444	-0.672222	0.102222
324.5									317.167	-0.818889	-0.988889	-0.903889	0.085
325									317.683	-1.23333	-0.897778	-1.06556	0.167778
325.5									318.183	-1.21111	-1.08	-1.14556	0.0655556
326									318.7	-1.54111	-1.31222	-1.42667	0.114444
326.5									319.2	-1.42667	-2.24889	-1.83778	0.411111
327									319.717	-1.89778	-3.57778	-2.73778	0.84
327.5									320.217	-1.71556	-2.78	-2.24778	0.532222
328									320.733	-2.45444	-2.89	-2.67222	0.217778
328.5									321.233	-2.43556	-2.70111	-2.56833	0.132778
329									321.75	-2.35	-2.51333	-2.43167	0.0816667
329.5									322.267	-2.26444	-2.71667	-2.49056	0.226111
330									322.767	-1.97889	-2.70889	-2.34389	0.365
330.5									323.283	-1.73111	-2.53556	-2.13333	0.402222
331									323.783	-1.89444	-2.96556	-2.43	0.535556
331.5									324.3	-1.64778	-2.47222	-2.06	0.412222
332									324.8	-1.82	-2.45778	-2.13889	0.318889
332.5									325.317	-0.998889	-2.77667	-1.88778	0.888889
333									325.817	-1.05333	-3.24333	-2.14833	1.095
333.5									326.333	-1.37778	-3.51556	-2.44667	1.06889
334									326.833	-1.69556	-3.77556	-2.73556	1.04
334.5									327.35	-2.39556	-3.06889	-2.73222	0.336667
335									327.867	-2.28333	-3.18333	-2.73333	0.45
335.5									328.367	-2.33333	-2.45444	-2.39389	0.0605556
336									328.883	-2.26667	-2.27333	-2.27	0.00333333
336.5									329.383	-2.59556	-2.54111	-2.56833	0.0272222
337									329.9	-2.93889	-2.50778	-2.72333	0.215556
337.5									330.4	-3.22667	-2.29	-2.75833	0.468333
338									330.917	-3.16333	-2.51	-2.83667	0.326667
338.5									331.417	-2.68	-1.96333	-2.32167	0.358333
339									331.933	-2.65667	-2.84333	-2.75	0.0933333
339.5									332.433	-3.04	-3.72333	-3.38167	0.341667
340									332.95	-2.81	-4.07778	-3.44389	0.633889
340.5									333.467	-2.86556	-3.94	-3.40278	0.537222
341									333.967	-2.52333	-4.27333	-3.39833	0.875
341.5									334.483	-2.42	-4.02667	-3.22333	0.803333
342									334.983	-1.70222	-3.98	-2.84111	1.13889
342.5									335.5	-0.988889	-2.82556	-1.90722	0.918333
343									336	0.246667	-1.98889	-0.871111	1.11778
343.5									336.517	2.58111	-0.0988889	1.24111	1.34
344									337.017	5.68111	2.60444	4.14278	1.53833
344.5									337.533	9.32889	5.44556	7.38722	1.94167
345									338.033	14.6333	8.32667	11.48	3.15333
345.5									338.55	21.0278	11.3233	16.1756	4.85222
346									339.067	28.14	14.3089	21.2244	6.91556
346.5									339.567	34.71	17.9667	26.3383	8.37167
347									340.083	41.5567	21.2233	31.39	10.1667
347.5									340.583	48.0422	23.8989	35.9706	12.0717
348									341.1	53.5356	25.9878	39.7617	13.7739
348.5									341.6	58.6622	27.9556	43.3089	15.3533
349									342.117	63.1956	29.0722	46.1339	17.0617
349.5									342.617	65.7356	29.9467	47.8411	17.8944
350									343.133	67.1778	30.8556	49.0167	18.1611
350.5									343.633	67.77	31.3589	49.5644	18.2056
351									344.15	69.0667	31.6789	50.3728	18.6939
351.5									344.667	69.6867	31.84	50.7633	18.9233
352									345.167	69.8678	32.0922	50.98	18.8878
352.5									345.683	70.5722	31.9644	51.2683	19.3039
353									346.183	70.8944	32.1056	51.5	19.3944
353.5									346.7	70.5833	32.0178	51.3006	19.2828
354									347.2	70.9644	31.82	51.3922	19.5722
354.5									347.717	71.2789	32.4056	51.8422	19.4367
355									348.217	71.5278	32.3578	51.9428	19.585
355.5									348.733	71.5011	32.46	51.9806	19.5206
356									349.233	71.8644	32.5844	52.2244	19.64
356.5									349.75	72.2044	32.8322	52.5183	19.6861
357									350.267	72.0422	32.6611	52.3517	19.6906
357.5									350.767	71.9222	32.6311	52.2767	19.6456
358									351.283	72.1789	32.5578	52.3683	19.8106
358.5									351.783	72.0211	32.8833	52.4522	19.5689
359									352.3	71.7322	32.6756	52.2039	19.5283
359.5									352.8	72.0244	32.7989	52.4117	19.6128
360									353.317	71.9922	32.9244	52.4583	19.5339
360.5									353.817	71.49	33.2344	52.3622	19.1278
361									354.333	71.4722	32.9756	52.2239	19.2483
361.5									354.833	70.6611	33.5933	52.1272	18.5339
362									355.35	70.5356	33.3767	51.9561	18.5794
362.5									355.867	69.9356	34.0967	52.0161	17.9194
363									356.367	69.7433	33.9078	51.8256	17.9178
363.5									356.883	69.8111	33.8133	51.8122	17.9989
364									357.383	69.1889	33.7911	51.49	17.6989
364.5									357.9	69.3589	33.3889	51.3739	17.985
365									358.4	69.4044	32.6133	51.0089	18.3956
365.5									358.917	68.4222	33.1067	50.7644	17.6578
366									359.417	68.9544	32.8278	50.8911	18.0633
366.5									359.933	68.5744	32.9822	50.7783	17.7961
367									360.433	68.73	32.2378	50.4839	18.2461
367.5									360.95	68.0989	32.4111	50.255	17.8439
368									361.467	68.0422	32.4689	50.2556	17.7867
368.5									361.967	67.9644	32.41	50.1872	17.7772
369									362.483	67.6333	32.4589	50.0461	17.5872
369.5									362.983	67.7544	33.0444	50.3994	17.355
370									363.5	68.0344	32.6311	50.3328	17.7017
370.5									364	67.85	32.4056	50.1278	17.7222
371									364.517	68.0811	32.0189	50.05	18.0311
371.5									365.017	68.1078	31.7256	49.9167	18.1911
372									365.533	68.4822	32.04	50.2611	18.2211
372.5									366.033	67.7689	32.0033	49.8861	17.8828
373									366.55	67.98	32.0356	50.0078	17.9722
373.5									367.067	67.9078	31.7911	49.8494	18.0583
374									367.567	67.4889	31.65	49.5694	17.9194
374.5									368.083	67.2533	31.6067	49.43	17.8233
375									368.583	67.49	32.1322	49.8111	17.6789
375.5									369.1	67.4756	32.7011	50.0883	17.3872
376									369.6	67.1722	33.1778	50.175	16.9972
376.5									370.117	66.9822	32.5367	49.7594	17.2228
377									370.617	67.3889	32.7922	50.0906	17.2983
377.5									371.133	67.1667	33.7278	50.4472	16.7194
378									371.633	66.8433	33.3678	50.1056	16.7378
378.5									372.15	67.0511	33.28	50.1656	16.8856
379									372.65	67.4911	32.9311	50.2111	17.28
379.5									373.167	67.3744	32.2033	49.7889	17.5856
380									373.683	67.2033	32.22	49.7117	17.4917
380.5									374.183	67.6644	32.4967	50.0806	17.5839
381									374.7	67.87	32.3678	50.1189	17.7511
381.5									375.2	67.8478	32.6233	50.2356	17.6122
382									375.717	68.1756	32.0144	50.095	18.0806
382.5									376.217	68.3756	33.1344	50.755	17.6206
383									376.733	68.7722	33.0578	50.915	17.8572
383.5									377.233	68.8278	34.2789	51.5533	17.2744
384									377.75	68.7644	34.7244	51.7444	17.02
384.5									378.25	69.0489	34.7389	51.8939	17.155
385									378.767	69.3089	35.02	52.1644	17.1444
385.5									379.283	69.3789	36.1489	52.7639	16.615
386									379.783	69.7022	35.42	52.5611	17.1411
386.5									380.3	69.9022	35.6422	52.7722	17.13
387									380.8	70.0522	35.8644	52.9583	17.0939
387.5									381.317	70.0222	36.2222	53.1222	16.9
388									381.817	69.8933	35.7389	52.8161	17.0772
388.5									382.333	70.0811	37.0522	53.5667	16.5144
389									382.833	69.7656	37.0933	53.4294	16.3361
389.5									383.35	69.6678	37.4133	53.5406	16.1272
390									383.85	70.2156	37.0856	53.6506	16.565
390.5									384.367	70.6533	38.1256	54.3894	16.2639
391									384.883	70.5789	38.0278	54.3033	16.2756
391.5									385.383	70.9333	37.9844	54.4589	16.4744
392									385.9	70.9011	38.7711	54.8361	16.065
392.5									386.4	71.2244	38.6756	54.95	16.2744
393									386.917	71.4011	38.3678	54.8844	16.5167
393.5									387.417	72.2611	38.8222	55.5417	16.7194
394									387.933	72.7611	39.0144	55.8878	16.8733
394.5									388.433	72.3567	39.2122	55.7844	16.5722
395									388.95	72.3578	39.5044	55.9311	16.4267
395.5									389.45	73.1233	40.1589	56.6411	16.4822
396									389.967	73.6656	40.2	56.9328	16.7328
396.5									390.467	73.6567	40.2456	56.9511	16.7056
397									390.983	74.2744	40.3856	57.33	16.9444
397.5									391.5	74.51	40.3122	57.4111	17.0989
398									392	74.5222	40.33	57.4261	17.0961
398.5									392.517	74.3733	40.5044	57.4389	16.9344
399									393.017	74.5389	40.52	57.5294	17.0094
399.5									393.533	74.4233	40.46	57.4417	16.9817
400									394.033	73.6922	40.4267	57.0594	16.6328
400.5									394.55	73.4433	40.5367	56.99	16.4533
401									395.05	73.6156	40.6022	57.1089	16.5067
401.5									395.567	73.02	41.3256	57.1728	15.8472
402									396.067	72.9611	41.6256	57.2933	15.6678
402.5									396.583	72.73	42.0089	57.3694	15.3606
403									397.083	72.7044	42.9178	57.8111	14.8933
403.5									397.6	72.9678	43.3444	58.1561	14.8117
404									398.117	72.9367	43.97	58.4533	14.4833
404.5									398.617	73.3667	44.2444	58.8056	14.5611
405									399.133	73.5267	44.2322	58.8794	14.6472
405.5									399.633	74.1144	44.6844	59.3994	14.715
406									400.15	74.3222	44.46	59.3911	14.9311
406.5									400.65	74.54	44.6656	59.6028	14.9372
407									401.167	74.3811	45.1611	59.7711	14.61
407.5									401.667	74.7522	44.5589	59.6556	15.0967
408									402.183	74.8944	44.8167	59.8556	15.0389
408.5									402.683	75.2622	44.4078	59.835	15.4272
409									403.2	75.5367	44.04	59.7883	15.7483
409.5									403.717	75.0111	44.2767	59.6439	15.3672
410									404.217	74.4889	44.2556	59.3722	15.1167
410.5									404.733	74.6167	44.7633	59.69	14.9267
411									405.233	75.08	44.8833	59.9817	15.0983
411.5									405.75	75.2611	44.5289	59.895	15.3661
412									406.25	74.5133	44.5867	59.55	14.9633
412.5									406.767	74.4411	44.8422	59.6417	14.7994
413									407.267	74.7678	45	59.8839	14.8839
413.5									407.783	74.4222	44.1822	59.3022	15.12
414									408.283	74.5511	44.1156	59.3333	15.2178
414.5									408.8	74.6222	43.2422	58.9322	15.69
415									409.317	74.6767	43.4822	59.0794	15.5972
415.5									409.817	74.4911	42.8922	58.6917	15.7994
416									410.333	74.68	42.2989	58.4894	16.1906
416.5									410.833	75.1889	42.2633	58.7261	16.4628
417									411.35	75.4044	41.5356	58.47	16.9344
417.5									411.85	75.0489	41.2589	58.1539	16.895
418									412.367	74.8889	42.2522	58.5706	16.3183
418.5									412.867	75.31	42.2156	58.7628	16.5472
419									413.383	75.3767	43.1089	59.2428	16.1339
419.5									413.883	75.4578	43.3411	59.3994	16.0583
420									414.4	75.1956	44.4567	59.8261	15.3694
420.5									414.9	75.53	44.74	60.135	15.395
421									415.417	76.1378	44.9289	60.5333	15.6044
421.5									415.933	75.7156	45.6711	60.6933	15.0222
422									416.433	75.8	45.8567	60.8283	14.9717
422.5									416.95	75.7567	45.9511	60.8539	14.9028
423									417.45	75.54	46.4933	61.0167	14.5233
423.5									417.967	75.5711	45.5956	60.5833	14.9878
424									418.467	75.3078	44.7511	60.0294	15.2783
424.5									418.983	75.6978	44.4122	60.055	15.6428
425									419.483	75.8833	43.9933	59.9383	15.945
425.5									420	75.7278	43.0378	59.3828	16.345
426									420.5	76.1056	42.6622	59.3839	16.7217
426.5									421.017	76.4578	42.5978	59.5278	16.93
427									421.517	76.7444	42.6133	59.6789	17.0656
427.5									422.033	77.3422	42.3089	59.8256	17.5167
428									422.55	77.6978	42.7678	60.2328	17.465
428.5									423.05	78.5311	42.8267	60.6789	17.8522
429									423.567	78.6244	41.7667	60.1956	18.4289
429.5									424.067	78.2933	42.7211	60.5072	17.7861
430									424.583	78.0489	43.0222	60.5356	17.5133
430.5									425.083	78.3467	42.2278	60.2872	18.0594
431									425.6	77.9422	42.02	59.9811	17.9611
431.5									426.1	78.5811	41.9611	60.2711	18.31
432									426.617	78.12	41.4833	59.8017	18.3183
432.5									427.117	77.9211	42.2378	60.0794	17.8417
433									427.633	77.7511	42.4533	60.1022	17.6489
433.5									428.15	77.0844	42.5456	59.815	17.2694
434									428.65	77.13	41.4022	59.2661	17.8639
434.5									429.167	77.3656	41.1378	59.2517	18.1139
435									429.667	77.2967	41.7811	59.5389	17.7578
435.5									430.183	77.13	41.3133	59.2217	17.9083
436									430.683	76.6911	40.7778	58.7344	17.9567
436.5									431.2	76.1078	40.18	58.1439	17.9639
437									431.7	75.99	38.4956	57.2428	18.7472
437.5									432.217	75.6622	37.3244	56.4933	19.1689
438									432.717	76.4522	37.2956	56.8739	19.5783
438.5									433.233	76.6056	37.4822	57.0439	19.5617
439									433.75	76.0644	37.1356	56.6	19.4644
439.5									434.25	75.8567	36.2922	56.0744	19.7822
440									434.767	75.7433	36.3144	56.0289	19.7144
440.5									435.267	74.9111	36.6322	55.7717	19.1394
441									435.783	75.0089	37.4189	56.2139	18.795
441.5									436.283	74.8444	37.4156	56.13	18.7144
442									436.8	74.6256	37.85	56.2378	18.3878
442.5									437.3	73.5956	37.7267	55.6611	17.9344
443									437.817	73.1233	38.0678	55.5956	17.5278
443.5									438.317	73.1222	38.6378	55.88	17.2422
444									438.833	72.96	38.4811	55.7206	17.2394
444.5									439.333	73.6856	39.0567	56.3711	17.3144
445									439.85	74.3533	38.2744	56.3139	18.0394
445.5									440.367	74.0167	38.2944	56.1556	17.8611
446									440.867	73.9122	37.0189	55.4656	18.4467
446.5									441.383	73.75	36.6889	55.2194	18.5306
447									441.883	74.3933	36.2567	55.325	19.0683
447.5									442.4	74.6722	35.8467	55.2594	19.4128
448									442.9	74.7056	35.4978	55.1017	19.6039
448.5									443.417	75.3522	35.27	55.3111	20.0411
449									443.917	74.2444	34.3089	54.2767	19.9678
449.5									444.433	73.8867	34.4056	54.1461	19.7406
450									444.95	74.41	34.0333	54.2217	20.1883
450.5									445.45	74.7511	35.4511	55.1011	19.65
451									445.967	74.5956	34.6044	54.6	19.9956
451.5									446.467	74.1578	34.4522	54.305	19.8528
452									446.983	73.89	34.1678	54.0289	19.8611
452.5									447.483	73.9967	34.2111	54.1039	19.8928
453									448	73.3567	34.4267	53.8917	19.465
453.5									448.5	73.7311	34.5733	54.1522	19.5789
454									449.017	73.7067	34.1011	53.9039	19.8028
454.5									449.517	73.3922	32.8344	53.1133	20.2789
455									450.033	72.7333	32.3622	52.5478	20.1856
455.5									450.533	73.0089	33.0122	53.0106	19.9983
456									451.05	72.8622	33.3767	53.1194	19.7428
456.5									451.567	72.4167	32.4211	52.4189	19.9978
457									452.067	72.1644	32.3433	52.2539	19.9106
457.5									452.583	72.0356	32.08	52.0578	19.9778
458									453.083	72.0778	31.9789	52.0283	20.0494
458.5									453.6	72.3311	31.82	52.0756	20.2556
459									454.1	72.28	32.06	52.17	20.11
459.5									454.617	72.4111	32.6467	52.5289	19.8822
460									455.117	71.7278	32.7089	52.2183	19.5094
460.5									455.633	71.7378	31.9178	51.8278	19.91
461									456.133	71.9356	33.0433	52.4894	19.4461
461.5									456.65	71.3556	32.8044	52.08	19.2756
462									457.167	70.5644	33.1089	51.8367	18.7278
462.5									457.667	70.4044	33.0133	51.7089	18.6956
463									458.183	70.1989	33.32	51.7594	18.4394
463.5									458.683	70.4478	34.5933	52.5206	17.9272
464									459.2	70.0356	34.17	52.1028	17.9328
464.5									459.7	70.26	33.8311	52.0456	18.2144
465									460.217	70.0278	34.6556	52.3417	17.6861
465.5									460.717	69.7856	34.2956	52.0406	17.745
466									461.233	70.4656	34.2056	52.3356	18.13
466.5									461.733	70.7244	34.0089	52.3667	18.3578
467									462.25	70.7678	33.8089	52.2883	18.4794
467.5									462.767	70.2867	34.2211	52.2539	18.0328
468									463.267	69.5056	32.5556	51.0306	18.475
468.5									463.783	69.8989	32.5722	51.2356	18.6633
469									464.283	70.0789	33.1133	51.5961	18.4828
469.5									464.8	69.6889	32.4778	51.0833	18.6056
470									465.3	69.6478	32.9089	51.2783	18.3694
470.5									465.817	69.0122	33.5122	51.2622	17.75
471									466.317	69.12	33.3	51.21	17.91
471.5									466.833	68.2022	33.6967	50.9494	17.2528
472									467.333	67.87	33.9967	50.9333	16.9367
472.5									467.85	68.5122	35.5044	52.0083	16.5039
473									468.35	67.8811	35.7578	51.8194	16.0617
473.5									468.867	67.5344	35.6056	51.57	15.9644
474									469.383	67.9033	36.0744	51.9889	15.9144
474.5									469.883	68.14	35.4344	51.7872	16.3528
475									470.4	68.48	34.63	51.555	16.925
475.5									470.9	68.5733	35.5933	52.0833	16.49
476									471.417	68.8578	35.7167	52.2872	16.5706
476.5									471.917	68.6633	34.8722	51.7678	16.8956
477									472.433	68.28	34.8578	51.5689	16.7111
477.5									472.933	68.4922	34.4411	51.4667	17.0256
478									473.45	68.5333	34.1622	51.3478	17.1856
478.5									473.95	68.2067	34.3222	51.2644	16.9422
479									474.467	67.9867	34.5367	51.2617	16.725
479.5									474.967	67.5456	34.8833	51.2144	16.3311
480									475.483	67.5389	35.2956	51.4172	16.1217
480.5									476	67.7967	35.4211	51.6089	16.1878
481									476.5	68.3022	35.3567	51.8294	16.4728
481.5									477.017	68.3667	35.6511	52.0089	16.3578
482									477.517	68.6633	35.8967	52.28	16.3833
482.5									478.033	68.3956	35.5344	51.965	16.4306
483									478.533	68.0156	35.1756	51.5956	16.42
483.5									479.05	67.7133	35.16	51.4367	16.2767
484									479.55	67.8878	35.3678	51.6278	16.26
484.5									480.067	67.9178	33.7789	50.8483	17.0694
485									480.567	67.4611	33.12	50.2906	17.1706
485.5									481.083	67.5278	33.55	50.5389	16.9889
486									481.6	66.9911	32.5144	49.7528	17.2383
486.5									482.1	66.4744	32.0333	49.2539	17.2206
487									482.617	66.2678	32.7289	49.4983	16.7694
487.5									483.117	66.7044	33.1033	49.9039	16.8006
488									483.633	66.8889	33.4211	50.155	16.7339
488.5									484.133	66.3556	32.9733	49.6644	16.6911
489									484.65	66.2078	32.9956	49.6017	16.6061
489.5									485.15	66.4944	32.5278	49.5111	16.9833
490									485.667	66.1033	32.3467	49.225	16.8783
490.5									486.167	66.4578	32.8978	49.6778	16.78
491									486.683	66.3378	33.5644	49.9511	16.3867
491.5									487.2	66.7378	33.7267	50.2322	16.5056
492									487.7	66.35	33.9978	50.1739	16.1761
492.5									488.217	66.1889	33.6622	49.9256	16.2633
493									488.717	66.5678	33.9967	50.2822	16.2856
493.5									489.233	66.43	34.43	50.43	16
494									489.733	66.5689	34.8222	50.6956	15.8733
494.5									490.25	67.2889	34.6578	50.9733	16.3156
495									490.75	67.6989	34.4511	51.075	16.6239
495.5									491.267	68.0322	33.85	50.9411	17.0911
496									491.767	67.9767	33.7367	50.8567	17.12
496.5									492.283	67.8967	32.9222	50.4094	17.4872
497									492.8	67.74	32.7778	50.2589	17.4811
497.5									493.3	67.6411	32.5033	50.0722	17.5689
498									493.817	67.48	32.3567	49.9183	17.5617
498.5									494.317	66.9933	32.8256	49.9094	17.0839
499									494.833	66.7044	33.9778	50.3411	16.3633
499.5									495.333	65.8478	33.9156	49.8817	15.9661
500									495.85	65.7733	34.3589	50.0661	15.7072
500.5									496.35	66.2344	34.4811	50.3578	15.8767
501									496.867	67.2656	34.8267	51.0461	16.2194
501.5									497.367	67.6911	34.7767	51.2339	16.4572
502									497.883	67.5322	34.4433	50.9878	16.5444
502.5									498.4	67.4433	34.4167	50.93	16.5133
503									498.9	67.6667	34.2444	50.9556	16.7111
503.5									499.417	67.3711	32.9233	50.1472	17.2239
504									499.917	68.1278	33.4233	50.7756	17.3522
504.5									500.433	68.5256	33.2689	50.8972	17.6283
505									500.933	67.5178	33.6767	50.5972	16.9206
505.5									501.45	66.4144	34.4233	50.4189	15.9956
506									501.95	66.14	34.67	50.405	15.735
506.5									502.467	65.8289	35.0267	50.4278	15.4011
507									502.967	65.4489	35.1956	50.3222	15.1267
507.5									503.483	65.8333	35.1078	50.4706	15.3628
508									504	65.5178	35.0811	50.2994	15.2183
508.5									504.5	65.4422	34.9511	50.1967	15.2456
509									505.017	64.8611	35.27	50.0656	14.7956
509.5									505.517	65.2833	34.2511	49.7672	15.5161
510									506.033	65.4378	33.3667	49.4022	16.0356
510.5									506.533	65.0511	33.3378	49.1944	15.8567
511									507.05	65.2033	33.2467	49.225	15.9783
511.5									507.55	65.9	34.1311	50.0156	15.8844
512									508.067	65.3778	34.0844	49.7311	15.6467
512.5									508.567	65.1056	34.4756	49.7906	15.315
513									509.083	64.06	34.0956	49.0778	14.9822
513.5									509.6	64.3311	33.2289	48.78	15.5511
514									510.1	64.3467	33.3922	48.8694	15.4772
514.5									510.617	64.5489	33.2111	48.88	15.6689
515									511.117	64.4433	33.4056	48.9244	15.5189
515.5									511.633	63.9256	32.6078	48.2667	15.6589
516									512.133	63.2778	31.4778	47.3778	15.9
516.5									512.65	62.9078	31.6122	47.26	15.6478
517									513.15	62.7656	31.3289	47.0472	15.7183
517.5									513.667	63.1944	30.6533	46.9239	16.2706
518									514.167	62.3544	30.8544	46.6044	15.75
518.5									514.683	61.4644	31.1656	46.315	15.1494
519									515.2	60.7978	30.9289	45.8633	14.9344
519.5									515.7	60.6067	30.1656	45.3861	15.2206
520									516.217	60.8789	30.1322	45.5056	15.3733
520.5									516.717	60.6211	30.3333	45.4772	15.1439
521									517.233	60.4078	30.2844	45.3461	15.0617
521.5									517.733	60.8811	30.6367	45.7589	15.1222
522									518.25	61.0744	30.4589	45.7667	15.3078
522.5									518.75	61.4967	30.1233	45.81	15.6867
523									519.267	61.9633	29.2678	45.6156	16.3478
523.5									519.767	62.4656	29.1633	45.8144	16.6511
524									520.283	62.3433	28.6311	45.4872	16.8561
524.5									520.783	62.7344	29.3989	46.0667	16.6678
525									521.3	62.8456	28.9744	45.91	16.9356
525.5									521.817	63.2378	28.0833	45.6606	17.5772
526									522.317	63.0778	26.8656	44.9717	18.1061
526.5									522.833	62.8478	27.0744	44.9611	17.8867
527									523.333	62.6322	27.1422	44.8872	17.745
527.5									523.85	62.59	27.8389	45.2144	17.3756
528									524.35	62.4122	27.2956	44.8539	17.5583
528.5									524.867	62.9622	26.9944	44.9783	17.9839
529									525.367	62.5656	26.0367	44.3011	18.2644
529.5									525.883	62.2278	25.4711	43.8494	18.3783
530									526.383	61.8644	26.2611	44.0628	17.8017
530.5									526.9	61.6178	27.3711	44.4944	17.1233
531									527.417	61.38	27.2233	44.3017	17.0783
531.5									527.917	61.2156	27.5389	44.3772	16.8383
532									528.433	61.1689	27.0411	44.105	17.0639
532.5									528.933	60.9467	27.17	44.0583	16.8883
533									529.45	60.7122	27.5211	44.1167	16.5956
533.5									529.95	60.6711	27.9044	44.2878	16.3833
534									530.467	60.6356	28.63	44.6328	16.0028
534.5									530.967	60.5178	28.2811	44.3994	16.1183
535									531.483	60.43	27.8978	44.1639	16.2661
535.5									531.983	60.1178	27.9089	44.0133	16.1044
536									532.5	59.9233	27.3956	43.6594	16.2639
536.5									533.017	59.6222	27.2411	43.4317	16.1906
537									533.517	59.9311	27.62	43.7756	16.1556
537.5									534.033	59.86	28.0856	43.9728	15.8872
538									534.533	59.9267	28.59	44.2583	15.6683
538.5									535.05	59.8156	28.1678	43.9917	15.8239
539									535.55	59.9756	27.9078	43.9417	16.0339
539.5									536.067	60.0011	27.99	43.9956	16.0056
540									536.567	60.1478	28.0189	44.0833	16.0644
540.5									537.083	60.1522	28.1889	44.1706	15.9817
541									537.583	60.1044	28.7767	44.4406	15.6639
541.5									538.1	59.2844	28.3267	43.8056	15.4789
542									538.617	59.2822	28.2689	43.7756	15.5067
542.5									539.117	58.8789	27.5367	43.2078	15.6711
543									539.633	58.9967	27.5211	43.2589	15.7378
543.5									540.133	58.8222	28.0367	43.4294	15.3928
544									540.65	58.7178	27.4933	43.1056	15.6122
544.5									541.15	58.9756	28.4967	43.7361	15.2394
545									541.667	58.6078	28.2444	43.4261	15.1817
545.5									542.167	58.9089	27.8356	43.3722	15.5367
546									542.683	58.7989	29.1489	43.9739	14.825
546.5									543.183	58.1422	29.1544	43.6483	14.4939
547									543.7	58.7033	29.1778	43.9406	14.7628
547.5									544.217	58.4556	29.3022	43.8789	14.5767
548									544.717	59.3922	29.3089	44.3506	15.0417
548.5									545.233	59.3422	29.5822	44.4622	14.88
549									545.733	58.8689	28.43	43.6494	15.2194
549.5									546.25	59.7133	28.8711	44.2922	15.4211
550									546.75	59.9922	28.7244	44.3583	15.6339
550.5									547.267	60.1544	27.5389	43.8467	16.3078
551									547.767	60.3656	27.8211	44.0933	16.2722
551.5									548.283	59.9333	27.6544	43.7939	16.1394
552									548.783	60.7344	27.9178	44.3261	16.4083
552.5									549.3	59.8722	27.6611	43.7667	16.1056
553									549.817	59.7456	27.7411	43.7433	16.0022
553.5									550.317	59.5656	27.8156	43.6906	15.875
554									550.833	59.0178	27.5756	43.2967	15.7211
554.5									551.333	58.6211	27.9811	43.3011	15.32
555									551.85	58.7656	28.0456	43.4056	15.36
555.5									552.35	58.6922	27.8878	43.29	15.4022
556									552.867	58.4878	28.6433	43.5656	14.9222
556.5									553.367	57.9622	28.5244	43.2433	14.7189
557									553.883	57.48	29.3656	43.4228	14.0572
557.5									554.383	57.9289	28.9633	43.4461	14.4828
558									554.9	57.5444	28.9589	43.2517	14.2928
558.5									555.417	57.4767	28.6067	43.0417	14.435
559									555.917	56.9367	28.1622	42.5494	14.3872
559.5									556.433	56.3511	28.8278	42.5894	13.7617
560									556.933	56.4989	28.8233	42.6611	13.8378
560.5									557.45	56.7544	27.9378	42.3461	14.4083
561									557.95	56.8467	27.7544	42.3006	14.5461
561.5									558.467	57.3133	26.6367	41.975	15.3383
562									558.967	56.6156	27.9044	42.26	14.3556
562.5									559.483	56.9844	27.5033	42.2439	14.7406
563									560	57.1889	27.4844	42.3367	14.8522
563.5									560.5	57.51	26.5167	42.0133	15.4967
564									561.017	57.5478	25.3967	41.4722	16.0756
564.5									561.517	56.9567	25.47	41.2133	15.7433
565									562.033	56.6722	26.36	41.5161	15.1561
565.5									562.533	56.1022	26.3778	41.24	14.8622
566									563.05	56.2522	25.94	41.0961	15.1561
566.5									563.55	56.33	25.0033	40.6667	15.6633
567									564.067	56.6156	25.71	41.1628	15.4528
567.5									564.567	56.5589	26.2222	41.3906	15.1683
568									565.083	56.6667	25.8478	41.2572	15.4094
568.5									565.6	56.9344	26.4533	41.6939	15.2406
569									566.1	57.5489	25.3589	41.4539	16.095
569.5									566.617	57.2478	24.6133	40.9306	16.3172
570									567.117	57.8244	24.3078	41.0661	16.7583
570.5									567.633	57.4733	25.5689	41.5211	15.9522
571									568.133	57.4167	25.1789	41.2978	16.1189
571.5									568.65	57.2767	24.8667	41.0717	16.205
572									569.15	56.8311	24.25	40.5406	16.2906
572.5									569.667	56.4311	25.2911	40.8611	15.57
573									570.167	56.8856	25.4411	41.1633	15.7222
573.5									570.683	56.0944	25.7056	40.9	15.1944
574									571.183	56.28	25.3611	40.8206	15.4594
574.5									571.7	56.3222	25.5056	40.9139	15.4083
575									572.217	55.9778	24.7756	40.3767	15.6011
575.5									572.717	56.1722	25.7344	40.9533	15.2189
576									573.233	55.7533	26.32	41.0367	14.7167
576.5									573.733	55.5422	26.4389	40.9906	14.5517
577									574.25	55.3289	26.7222	41.0256	14.3033
577.5									574.75	54.8056	26.0344	40.42	14.3856
578									575.267	54.6367	26.2167	40.4267	14.21
578.5									575.767	54.6656	27.4567	41.0611	13.6044
579									576.283	54.1689	26.7844	40.4767	13.6922
579.5									576.783	54.6944	26.4456	40.57	14.1244
580									577.3	54.6856	24.7144	39.7	14.9856
580.5									577.817	55.0778	25.2989	40.1883	14.8894
581									578.317	55.6756	24.7133	40.1944	15.4811
581.5									578.833	55.9756	24.5811	40.2783	15.6972
582									579.333	56.0344	24.8233	40.4289	15.6056
582.5									579.85	56.7733	25.2211	40.9972	15.7761
583									580.35	56.5511	24.6844	40.6178	15.9333
583.5									580.867	56.4144	25.5978	41.0061	15.4083
584									581.367	55.8756	26.2733	41.0744	14.8011
584.5									581.883	55.7189	27.4833	41.6011	14.1178
585									582.383	55.2867	25.9733	40.63	14.6567
585.5									582.9	54.8589	26.3256	40.5922	14.2667
586									583.417	55.1256	26.63	40.8778	14.2478
586.5									583.917	54.8867	27.4956	41.1911	13.6956
587									584.433	54.7811	27.9678	41.3744	13.4067
587.5									584.933	54.9989	27.9278	41.4633	13.5356
588									585.45	55.4867	27.3156	41.4011	14.0856
588.5									585.95	55.5911	25.9211	40.7561	14.835
589									586.467	55.4256	25.3033	40.3644	15.0611
589.5									586.967	55.6178	25.1222	40.37	15.2478
590									587.483	55.7322	26.0022	40.8672	14.865
590.5									587.983	55.1256	24.9967	40.0611	15.0644
591									588.5	55.4556	24.7967	40.1261	15.3294
591.5									589.017	55.3978	23.8867	39.6422	15.7556
592									589.517	55.4389	23.8022	39.6206	15.8183
592.5									590.033	55.0533	23.9833	39.5183	15.535
593									590.533	54.7089	25.4844	40.0967	14.6122
593.5									591.05	54.8389	26.2533	40.5461	14.2928
594									591.55	54.7689	26.7367	40.7528	14.0161
594.5									592.067	54.4656	25.3511	39.9083	14.5572
595									592.567	54.4256	26.6133	40.5194	13.9061
595.5									593.083	53.8544	26.6889	40.2717	13.5828
596									593.583	53.75	26.8544	40.3022	13.4478
596.5									594.1	53.9467	25.8744	39.9106	14.0361
597									594.6	54.1044	25.3889	39.7467	14.3578
597.5									595.117	54.4944	25.1011	39.7978	14.6967
598									595.617	54.3744	24.3233	39.3489	15.0256
598.5									596.133	54.9833	24.6611	39.8222	15.1611
599									596.65	54.8822	25.0667	39.9744	14.9078
599.5									597.15	54.9722	24.5944	39.7833	15.1889
600									597.667	55.2522	23.9544	39.6033	15.6489
600.5									598.167	55.32	24.37	39.845	15.475
601									598.683	54.7511	24.3744	39.5628	15.1883
601.5									599.183	54.6911	25.4811	40.0861	14.605
602									599.7	54.2244	25.4978	39.8611	14.3633
602.5									600.2	54.2889	24.8756	39.5822	14.7067
603									600.717	53.25	24.3011	38.7756	14.4744
603.5									601.233	53.0433	24.54	38.7917	14.2517
604									601.733	53.0222	23.5389	38.2806	14.7417
604.5									602.25	52.6211	23.8411	38.2311	14.39
605									602.75	52.3867	23.0956	37.7411	14.6456
605.5									603.267	52.6544	23.8644	38.2594	14.395
606									603.767	52.0567	23.0944	37.5756	14.4811
606.5									604.283	52.6989	22.3278	37.5133	15.1856
607									604.783	53.0156	23.8667	38.4411	14.5744
607.5									605.3	53.5211	24.0044	38.7628	14.7583
608									605.8	53.9089	24.47	39.1894	14.7194
608.5									606.317	53.0989	25.1656	39.1322	13.9667
609									606.817	53.2967	24.9111	39.1039	14.1928
609.5									607.333	53.7311	25.7678	39.7494	13.9817
610									607.85	53.6311	25.6956	39.6633	13.9678
610.5									608.35	53.4256	25.49	39.4578	13.9678
611									608.867	52.9311	25.7556	39.3433	13.5878
611.5									609.367	52.3633	24.8967	38.63	13.7333
612									609.883	52.1833	24.8811	38.5322	13.6511
612.5									610.383	52.1589	24.1022	38.1306	14.0283
613									610.9	53.0322	23.9944	38.5133	14.5189
613.5									611.4	52.4833	24.0311	38.2572	14.2261
614									611.917	51.9122	23.4389	37.6756	14.2367
614.5									612.433	51.5411	23.1067	37.3239	14.2172
615									612.933	51.58	23.8478	37.7139	13.8661
615.5									613.45	51.4389	23.3744	37.4067	14.0322
616									613.95	51.0367	23.6511	37.3439	13.6928
616.5									614.467	50.9967	23.8167	37.4067	13.59
617									614.967	50.7856	24.3611	37.5733	13.2122
617.5									615.483	49.7389	24.8989	37.3189	12.42
618									615.983	49.9522	25.3078	37.63	12.3222
618.5									616.5	49.8611	24.9267	37.3939	12.4672
619									617	50.1244	25.2656	37.695	12.4294
619.5									617.517	50.2956	25.2367	37.7661	12.5294
620									618.017	50.4522	25.5356	37.9939	12.4583
620.5									618.533	51.1622	25.2322	38.1972	12.965
621									619.05	50.9667	25.4967	38.2317	12.735
621.5									619.55	50.8889	25.2856	38.0872	12.8017
622									620.067	51.4256	24.4611	37.9433	13.4822
622.5									620.567	51.4833	24.0211	37.7522	13.7311
623									621.083	51.5333	24.46	37.9967	13.5367
623.5									621.583	51.0089	24.58	37.7944	13.2144
624									622.1	50.9078	24.1811	37.5444	13.3633
624.5									622.6	50.7433	23.8933	37.3183	13.425
625									623.117	49.7878	24.6311	37.2094	12.5783
625.5									623.617	49.7778	24.0489	36.9133	12.8644
626									624.133	49.6156	24.0544	36.835	12.7806
626.5									624.633	49.7356	24.0489	36.8922	12.8433
627									625.15	49.36	23.7189	36.5394	12.8206
627.5									625.667	48.8233	23.8389	36.3311	12.4922
628									626.167	49.1022	23.4444	36.2733	12.8289
628.5									626.683	48.9133	23.8567	36.385	12.5283
629									627.183	48.3978	24.4611	36.4294	11.9683
629.5									627.7	49.5622	23.5389	36.5506	13.0117
630									628.2	49.1678	23.8211	36.4944	12.6733
630.5									628.717	49.9689	23.46	36.7144	13.2544
631									629.217	49.1656	23.7144	36.44	12.7256
631.5									629.733	49.4311	23.8856	36.6583	12.7728
632									630.233	49.7467	23.36	36.5533	13.1933
632.5									630.75	49.4078	23.3111	36.3594	13.0483
633									631.25	49.5467	23.1311	36.3389	13.2078
633.5									631.767	49.9078	23.1067	36.5072	13.4006
634									632.283	49.28	23.8311	36.5556	12.7244
634.5									632.783	49.7656	23.4367	36.6011	13.1644
635									633.3	49.2667	23.6456	36.4561	12.8106
635.5									633.8	49.8289	23.64	36.7344	13.0944
636									634.317	50.0811	24.14	37.1106	12.9706
636.5									634.817	50.0211	23.5567	36.7889	13.2322
637									635.333	50.2222	23.5578	36.89	13.3322
637.5									635.833	49.9389	23.65	36.7944	13.1444
638									636.35	49.8056	23.79	36.7978	13.0078
638.5									636.85	49.3211	22.8156	36.0683	13.2528
639									637.367	48.33	22.7978	35.5639	12.7661
639.5									637.883	47.6544	22.8167	35.2356	12.4189
640									638.383	47.9589	22.3589	35.1589	12.8
640.5									638.9	47.7833	21.5367	34.66	13.1233
641									639.4	47.4133	22.7667	35.09	12.3233
641.5									639.917	46.84	22.2911	34.5656	12.2744
642									640.417	46.4356	21.9289	34.1822	12.2533
642.5									640.933	46.4722	21.4544	33.9633	12.5089
643									641.433	47.1322	21.96	34.5461	12.5861
643.5									641.95	48.0844	21.5867	34.8356	13.2489
644									642.45	48.3833	20.4433	34.4133	13.97
644.5									642.967	47.7622	21.37	34.5661	13.1961
645									643.467	47.26	20.99	34.125	13.135
645.5									643.967	46.9922	19.7633	33.3778	13.6144
646									644.483	46.8111	19.4144	33.1128	13.6983
646.5									644.983	47.6911	18.7411	33.2161	14.475
647									645.5	47.0211	18.4333	32.7272	14.2939
647.5									646	45.8256	18.2033	32.0144	13.8111
648									646.517	44.8622	18.6178	31.74	13.1222
648.5									647.017	44.9978	19.6644	32.3311	12.6667
649									647.533	44.5567	18.3756	31.4661	13.0906
649.5									648.033	44.2456	17.6933	30.9694	13.2761
650									648.55	44.7844	17.8556	31.32	13.4644
650.5									649.05	45.0756	17.6622	31.3689	13.7067
651									649.567	43.88	17.8544	30.8672	13.0128
651.5									650.083	44.2756	17.5467	30.9111	13.3644
652									650.583	44.2878	17.1367	30.7122	13.5756
652.5									651.1	44.0256	17.2667	30.6461	13.3794
653									651.6	43.6144	16.5744	30.0944	13.52
653.5									652.117	43.7856	16.9722	30.3789	13.4067
654									652.617	44.1567	17.4167	30.7867	13.37
654.5									653.133	43.7122	17.6533	30.6828	13.0294
655									653.633	43.5756	18.1211	30.8483	12.7272
655.5									654.15	43.2511	18.2933	30.7722	12.4789
656									654.65	42.9067	18.5422	30.7244	12.1822
656.5									655.167	42.4333	18.0011	30.2172	12.2161
657									655.667	42.8689	17.63	30.2494	12.6194
657.5									656.183	42.4622	18.1067	30.2844	12.1778
658									656.7	42.0378	18.7156	30.3767	11.6611
658.5									657.2	41.42	19.3956	30.4078	11.0122
659									657.717	41.37	18.6767	30.0233	11.3467
659.5									658.217	40.8956	19.4633	30.1794	10.7161
660									658.733	41.1478	18.7189	29.9333	11.2144
660.5									659.233	40.8756	18.3333	29.6044	11.2711
661									659.75	41.4022	18.5667	29.9844	11.4178
661.5									660.25	40.8567	18.4267	29.6417	11.215
662									660.767	40.6278	17.5	29.0639	11.5639
662.5									661.267	40.8433	16.22	28.5317	12.3117
663									661.783	40.9944	16.3056	28.65	12.3444
663.5									662.3	40.8922	17.0356	28.9639	11.9283
664									662.8	40.8922	17.1522	29.0222	11.87
664.5									663.317	40.8833	17.3144	29.0989	11.7844
665									663.817	40.4522	17.15	28.8011	11.6511
665.5									664.333	39.4778	16.1967	27.8372	11.6406
666									664.833	39.2989	15.9156	27.6072	11.6917
666.5									665.35	38.8578	15.8033	27.3306	11.5272
667									665.85	37.5556	16.5544	27.055	10.5006
667.5									666.367	37.1167	15.5567	26.3367	10.78
668									666.867	36.0956	15.41	25.7528	10.3428
668.5									667.383	35.3211	14.7633	25.0422	10.2789
669									667.9	34.6489	14.9033	24.7761	9.87278
669.5									668.4	34.5311	15.0911	24.8111	9.72
670									668.917	34.2822	16.3056	25.2939	8.98833
670.5									669.417	33.6889	16.0322	24.8606	8.82833
671									669.933	33.3889	17.3911	25.39	7.99889
671.5									670.433	33.1444	16.01	24.5772	8.56722
672									670.95	32.77	15.9433	24.3567	8.41333
672.5									671.45	32.3478	15.5078	23.9278	8.42
673									671.967	32.2878	14.8444	23.5661	8.72167
673.5									672.467	32.1922	14.2211	23.2067	8.98556
674									672.983	31.6078	14.3844	22.9961	8.61167
674.5									673.5	31.8522	14.4667	23.1594	8.69278
675									674	32.4522	14.2522	23.3522	9.1
675.5									674.517	32.5511	12.7889	22.67	9.88111
676									675.017	32.8767	13.1533	23.015	9.86167
676.5									675.533	32.3456	13.3844	22.865	9.48056
677									676.033	32.0511	12.2689	22.16	9.89111
677.5									676.55	31.4844	11.9456	21.715	9.76944
678									677.05	30.73	11.7856	21.2578	9.47222
678.5									677.567	30.5778	11.1844	20.8811	9.69667
679									678.067	30.5133			#DIV/0!
679.5									678.583	29.4311			#DIV/0!
680									679.1	28.9722			#DIV/0!
680.5									679.6	28.8422			#DIV/0!
681									680.117	28.8078			#DIV/0!
681.5									680.617	28.9656			#DIV/0!
682									681.133	29.2667			#DIV/0!
682.5									681.633	29.4911			#DIV/0!
683									682.15	29.2133			#DIV/0!
683.5									682.65	28.5533			#DIV/0!
684									683.167	28.3189			#DIV/0!
684.5									683.667	27.4367			#DIV/0!
685									684.183	27.5711			#DIV/0!
685.5									684.683	27.76			#DIV/0!
686									685.2	27.9378			#DIV/0!
686.5									685.717	27.8656			#DIV/0!
687									686.217	28.1989			#DIV/0!
687.5									686.733	28.3756			#DIV/0!
688									687.233	29.0356			#DIV/0!
688.5									687.75	29.2933			#DIV/0!
689									688.25	29.9578			#DIV/0!
689.5									688.767	29.2056			#DIV/0!
690									689.267	28.3722			#DIV/0!
690.5									689.783	27.9033			#DIV/0!
691									690.283	27.7689			#DIV/0!
									690.8	27.25			#DIV/0!
									691.317	26.8756			#DIV/0!
									691.817	26.2989			#DIV/0!
									692.333	26.3244			#DIV/0!
									692.833	26.0422			#DIV/0!
									693.35	26.18			#DIV/0!
									693.85	26.0622			#DIV/0!
									694.367	25.7456			#DIV/0!
									694.867	24.8789			#DIV/0!
									695.383	24.7567			#DIV/0!
									695.883	24.7567			#DIV/0!
									696.4	24.5889			#DIV/0!
									696.9	24.2289			#DIV/0!
									697.417	24.2722			#DIV/0!
									697.933	23.6978			#DIV/0!
									698.433	23.4856			#DIV/0!
									698.95	23.8033			#DIV/0!
									699.45	24.2789			#DIV/0!
									699.967	24.1944			#DIV/0!
									700.467	23.8			#DIV/0!
									700.983	23.96			#DIV/0!
									701.483	23.8144			#DIV/0!
									702	23.6956			#DIV/0!
									702.5	24.3189			#DIV/0!
									703.017	25.3133			#DIV/0!
									703.533	24.98			#DIV/0!
									704.033	24.71			#DIV/0!
									704.55	24.71			#DIV/0!
									705.05	24.7989			#DIV/0!
									705.567	24.6322			#DIV/0!
									706.067	24.24			#DIV/0!
									706.583	23.8889			#DIV/0!
									707.083	23.4211			#DIV/0!
									707.6	22.7389			#DIV/0!
									708.1	22.96			#DIV/0!
									708.617	23.0178			#DIV/0!
									709.117	22.6656			#DIV/0!
									709.633	22.22			#DIV/0!
									710.15	21.6011			#DIV/0!
									710.65	21.9333			#DIV/0!
									711.167	22.2422			#DIV/0!
									711.667	22.4478			#DIV/0!
									712.183	22.5678			#DIV/0!
									712.683	22.9422			#DIV/0!
									713.2	22.6944			#DIV/0!
									713.7	23.1922			#DIV/0!
									714.217	23.9233			#DIV/0!
									714.717	24.3633			#DIV/0!
									715.233	24.0267			#DIV/0!
									715.75	23.3922			#DIV/0!
									716.25	23.0578			#DIV/0!
									716.767	23.1667			#DIV/0!
									717.267	22.1267			#DIV/0!
									717.783	22.3789			#DIV/0!
									718.283	22.1322			#DIV/0!
									718.8	21.3044			#DIV/0!
									719.3	20.71			#DIV/0!
									719.817	20.8156			#DIV/0!
									720.317	21.2211			#DIV/0!
									720.833	21.1522			#DIV/0!
									721.333	20.2711			#DIV/0!
									721.85	20.9556			#DIV/0!
									722.367	20.7822			#DIV/0!
									722.867	20.3822			#DIV/0!
									723.383	20.8111			#DIV/0!
									723.883	21.3467			#DIV/0!
									724.4	21.4744			#DIV/0!
									724.9	21.1522			#DIV/0!
									725.417	21.34			#DIV/0!
									725.917	21.9289			#DIV/0!
									726.433	21.44			#DIV/0!
									726.933	21.4922			#DIV/0!
									727.45	21.9967			#DIV/0!
									727.95	22.2811			#DIV/0!
									728.467	22.2344			#DIV/0!
									728.983	22.4889			#DIV/0!
									729.483	22.95			#DIV/0!
									730	23.3356			#DIV/0!
									730.5	23.2022			#DIV/0!
									731.017	23.1067			#DIV/0!
									731.517	22.7022			#DIV/0!
									732.033	22.5078			#DIV/0!
									732.533	22.4078			#DIV/0!
									733.05	22.3433			#DIV/0!
									733.567	21.9211			#DIV/0!
									734.067	21.7544			#DIV/0!
									734.583	21.9133			#DIV/0!
									735.083	22.2111			#DIV/0!
									735.6	22.3367			#DIV/0!
									736.1	22.9978			#DIV/0!
									736.617	22.8856			#DIV/0!
									737.117	22.7211			#DIV/0!
									737.633	23.0533			#DIV/0!
									738.133	22.97			#DIV/0!
									738.65	22.7244			#DIV/0!
									739.15	22.2078			#DIV/0!
									739.667	21.7956			#DIV/0!
									740.183	21.8589			#DIV/0!
									740.683	21.2756			#DIV/0!
									741.2	21.5067			#DIV/0!
									741.7	21.1678			#DIV/0!
									742.217	20.8289			#DIV/0!
									742.717	20.9522			#DIV/0!
									743.233	21.0911			#DIV/0!
									743.733	20.7467			#DIV/0!
									744.25	20.6833			#DIV/0!
									744.767	20.7567			#DIV/0!
									745.267	21.1433			#DIV/0!
									745.783	21.17			#DIV/0!
									746.283	21.5411			#DIV/0!
									746.8	21.0667			#DIV/0!
									747.3	21.5722			#DIV/0!
									747.817	21.0244			#DIV/0!
									748.317	21.0033			#DIV/0!
									748.833	21.2389			#DIV/0!
									749.333	21.51			#DIV/0!
									749.85	21.53			#DIV/0!
									750.367	21.26			#DIV/0!
									750.867	21.4889			#DIV/0!
									751.383	21.7178			#DIV/0!
									751.883	21.3633			#DIV/0!
									752.4	21.8433			#DIV/0!
									752.9	21.8656			#DIV/0!
									753.417	21.8522			#DIV/0!
									753.917	21.2733			#DIV/0!
									754.433	21.0989			#DIV/0!
									754.95	21.0522			#DIV/0!
									755.45	20.5389			#DIV/0!
									755.967	20.5244			#DIV/0!
									756.467	20.4322			#DIV/0!
									756.983	20.7822			#DIV/0!
									757.483	20.7833			#DIV/0!
									758	20.3033			#DIV/0!
									758.5	20.5078			#DIV/0!
									759.017	20.0478			#DIV/0!
									759.517	19.7256			#DIV/0!
									760.033	19.7967			#DIV/0!
									760.533	19.9589			#DIV/0!
									761.05	19.3744			#DIV/0!
									761.567	18.5256			#DIV/0!
									762.067	18.0111			#DIV/0!
									762.583	17.9133			#DIV/0!
									763.083	17.8722			#DIV/0!
									763.6	18.1111			#DIV/0!
									764.1	18.5122			#DIV/0!
									764.617	18.1822			#DIV/0!
									765.117	17.8778			#DIV/0!
									765.633	18.4189			#DIV/0!
									766.133	19.1744			#DIV/0!
									766.65	19.8467			#DIV/0!
									767.167	20.6667			#DIV/0!
									767.667	20.6211			#DIV/0!
									768.183	20.6589			#DIV/0!
									768.683	20.49			#DIV/0!
									769.2	21.0833			#DIV/0!
									769.7	20.9433			#DIV/0!
									770.217	20.9878			#DIV/0!
									770.717	21.2178			#DIV/0!
									771.233	21.44			#DIV/0!
									771.733	21.0756			#DIV/0!
									772.25	21.6233			#DIV/0!
									772.767	21.7533			#DIV/0!
									773.267	21.8022			#DIV/0!
									773.783	21.2289			#DIV/0!
									774.283	21.6144			#DIV/0!
									774.8	20.9778			#DIV/0!
									775.3	20.4256			#DIV/0!
									775.817	19.7933			#DIV/0!
									776.317	19.3556			#DIV/0!
									776.833	18.4489			#DIV/0!
									777.333	18.2			#DIV/0!
									777.85	17.9833			#DIV/0!
									778.367	18.4344			#DIV/0!
									778.867	18.1022			#DIV/0!
									779.383	18.5967			#DIV/0!
									779.883	18.4122			#DIV/0!
									780.4	19.2111			#DIV/0!
									780.9	19.6633			#DIV/0!
									781.417	19.3822			#DIV/0!
									781.917	19.5244			#DIV/0!
									782.433	19.5756			#DIV/0!
									782.933	19.3856			#DIV/0!
									783.45	19.5489			#DIV/0!
									783.95	18.7256			#DIV/0!
									784.467	18.9067			#DIV/0!
									784.983	17.8867			#DIV/0!
									785.483	17.7911			#DIV/0!
									786	18.3989			#DIV/0!
									786.5	18.4733			#DIV/0!
									787.017	18.6256			#DIV/0!
									787.517	18.6378			#DIV/0!
									788.033	18.6778			#DIV/0!
									788.533	19.0311			#DIV/0!
									789.05	18.6844			#DIV/0!
									789.567	19.1422			#DIV/0!
									790.067	19.6467			#DIV/0!
									790.583	19.6233			#DIV/0!
									791.083	19.4044			#DIV/0!
									791.6	19.22			#DIV/0!
									792.1	19.2211			#DIV/0!
									792.617	19.15			#DIV/0!
									793.117	18.8967			#DIV/0!
									793.633	18.6411			#DIV/0!
									794.133	19.05			#DIV/0!
									794.65	18.9933			#DIV/0!
									795.15	18.9067			#DIV/0!
									795.667	18.8333			#DIV/0!
									796.183	19.1122			#DIV/0!
									796.683	18.8633			#DIV/0!
									797.2	18.7622			#DIV/0!
									797.7	19.7522			#DIV/0!
									798.217	20.7044			#DIV/0!
									798.717	20.2233			#DIV/0!
									799.233	19.36			#DIV/0!
									799.733	19.2867			#DIV/0!
									800.25	19.4622			#DIV/0!
									800.75	19.1044			#DIV/0!
									801.267	19.2611			#DIV/0!
									801.767	19.04			#DIV/0!
									802.283	17.8589			#DIV/0!
									802.8	17.8767			#DIV/0!
									803.3	17.6611			#DIV/0!
									803.817	17.8156			#DIV/0!
									804.317	17.9511			#DIV/0!
									804.833	17.3544			#DIV/0!
									805.333	17.1244			#DIV/0!
									805.85	17.0522			#DIV/0!
									806.35	17.1233			#DIV/0!
									806.867	17.3533			#DIV/0!
									807.367	17.3411			#DIV/0!
									807.883	17.3222			#DIV/0!
									808.4	17.6622			#DIV/0!
									808.9	17.7444			#DIV/0!
									809.417	17.8067			#DIV/0!
									809.917	17.6156			#DIV/0!
									810.433	17.5189			#DIV/0!
									810.933	17.6122			#DIV/0!
									811.45	17.88			#DIV/0!
									811.95	17.3522			#DIV/0!
									812.467	17.2622			#DIV/0!
									812.967	16.7667			#DIV/0!
									813.483	16.2744			#DIV/0!
									814	16.39			#DIV/0!
									814.5	16.6989			#DIV/0!
									815.017	16.9956			#DIV/0!
									815.517	16.6378			#DIV/0!
									816.033	16.6978			#DIV/0!
									816.533	16.7011			#DIV/0!
									817.05	16.7489			#DIV/0!
									817.55	16.7978			#DIV/0!
									818.067	16.8022			#DIV/0!
									818.567	17.1133			#DIV/0!
									819.083	17.5133			#DIV/0!
									819.583	17.3633			#DIV/0!
									820.1	17.5722			#DIV/0!
									820.617	17.0189			#DIV/0!
									821.117	16.7178			#DIV/0!
									821.633	16.9544			#DIV/0!
									822.133	17.0644			#DIV/0!
									822.65	17.1167			#DIV/0!
									823.15	17.1633			#DIV/0!
									823.667	16.6			#DIV/0!
									824.167	16.5133			#DIV/0!
									824.683	16.28			#DIV/0!
									825.183	16.3844			#DIV/0!
									825.7	16.2167			#DIV/0!
									826.217	15.5022			#DIV/0!
									826.717	15.1289			#DIV/0!
									827.233	15.2744			#DIV/0!
									827.733	14.8956			#DIV/0!
									828.25	14.4844			#DIV/0!
									828.75	14.35			#DIV/0!
									829.267	13.9589			#DIV/0!
									829.767	14.3			#DIV/0!
									830.283	14.8267			#DIV/0!
									830.783	15.4933			#DIV/0!
									831.3	15.5422			#DIV/0!
									831.817	15.6744			#DIV/0!
									832.317	15.6444			#DIV/0!
									832.833	15.9311			#DIV/0!
									833.333	15.6322			#DIV/0!
									833.85	16.0267			#DIV/0!
									834.35	15.9878			#DIV/0!
									834.867	15.38			#DIV/0!
									835.367	15.1233			#DIV/0!
									835.883	15.14			#DIV/0!
									836.383	14.7778			#DIV/0!
									836.9	14.3689			#DIV/0!
									837.417	14.5044			#DIV/0!
									837.917	14.8889			#DIV/0!
									838.433	15.2467			#DIV/0!
									838.933	15.4			#DIV/0!
									839.45	16.1378			#DIV/0!
									839.95	16.29			#DIV/0!
									840.467	16.7411			#DIV/0!
									840.967	16.9344			#DIV/0!
									841.483	17.45			#DIV/0!
									842	16.9333			#DIV/0!
									842.5	16.9178			#DIV/0!
									843.017	16.9678			#DIV/0!
									843.517	16.4711			#DIV/0!
									844.033	16.4911			#DIV/0!
									844.533	16.0156			#DIV/0!
									845.05	15.6133			#DIV/0!
									845.55	15.84			#DIV/0!
									846.067	15.5722			#DIV/0!
									846.567	16.3767			#DIV/0!
									847.083	16.41			#DIV/0!
									847.6	16.3756			#DIV/0!
									848.1	16.59			#DIV/0!
									848.617	16.2356			#DIV/0!
									849.117	17.3644			#DIV/0!
									849.633	17.7156			#DIV/0!
									850.133	17.1967			#DIV/0!
									850.65	17.6356			#DIV/0!
									851.15	17.4589			#DIV/0!
									851.667	17.4556			#DIV/0!
									852.167	17.34			#DIV/0!
									852.683	17.4244			#DIV/0!
									853.183	16.8489			#DIV/0!
									853.7	16.3722			#DIV/0!
									854.217	15.9111			#DIV/0!
									854.717	16.1678			#DIV/0!
									855.233	16.47			#DIV/0!
									855.733	16.5322			#DIV/0!
									856.25	16.02			#DIV/0!
									856.75	15.7367			#DIV/0!
									857.267	16.0967			#DIV/0!
									857.767	16.9389			#DIV/0!
									858.283	16.7989			#DIV/0!
									858.8	17.6389			#DIV/0!
									859.3	17.4878			#DIV/0!
									859.817	17.2489			#DIV/0!
									860.317	17.1222			#DIV/0!
									860.833	17.59			#DIV/0!
									861.333	17.5333			#DIV/0!
									861.85	17.0444			#DIV/0!
									862.35	16.8378			#DIV/0!
									862.867	16.5522			#DIV/0!
									863.367	16.5167			#DIV/0!
									863.883	16.3467			#DIV/0!
									864.383	16.3878			#DIV/0!
									864.9	16.5133			#DIV/0!
									865.417	16.1167			#DIV/0!
									865.917	16.4944			#DIV/0!
									866.433	16.8067			#DIV/0!
									866.933	16.3367			#DIV/0!
									867.45	16.7367			#DIV/0!
									867.95	16.5211			#DIV/0!
									868.467	17.1744			#DIV/0!
									868.967	17.1544			#DIV/0!
									869.483	17.3122			#DIV/0!
									869.983	17.8422			#DIV/0!
									870.5	17.6			#DIV/0!
									871.017	17.5678			#DIV/0!
									871.517	17.7844			#DIV/0!
									872.033	17.7111			#DIV/0!
									872.533	17.5711			#DIV/0!
									873.05	17.51			#DIV/0!
									873.55	17.1378			#DIV/0!
									874.067	17.2489			#DIV/0!
									874.567	16.7878			#DIV/0!
									875.083	16.7122			#DIV/0!
									875.583	17.1478			#DIV/0!
									876.1	17.0756			#DIV/0!
									876.617	16.5411			#DIV/0!
									877.117	16.4689			#DIV/0!
									877.633	16.0856			#DIV/0!
									878.133	16.08			#DIV/0!
									878.65	15.5989			#DIV/0!
									879.15	15.5556			#DIV/0!
									879.667	16.3089			#DIV/0!
									880.167	15.4267			#DIV/0!
									880.683	15.4156			#DIV/0!
									881.183	16.0167			#DIV/0!
									881.7	15.8511			#DIV/0!
									882.217	15.8978			#DIV/0!
									882.717	16.3156			#DIV/0!
									883.233	16.2989			#DIV/0!
									883.733	16.0867			#DIV/0!
									884.25	15.2678			#DIV/0!
									884.75	15.3689			#DIV/0!
									885.267	15.8467			#DIV/0!
									885.767	15.8411			#DIV/0!
									886.283	15.68			#DIV/0!
									886.783	15.7056			#DIV/0!
									887.3	15.3178			#DIV/0!
									887.8	15.3478			#DIV/0!
									888.317	15.6711			#DIV/0!
									888.833	15.8056			#DIV/0!
									889.333	15.8467			#DIV/0!
									889.85	15.5978			#DIV/0!
									890.35	15.1778			#DIV/0!
									890.867	14.9633			#DIV/0!
									891.367	14.5778			#DIV/0!
									891.883	14.56			#DIV/0!
									892.383	14.8267			#DIV/0!
									892.9	14.9978			#DIV/0!
									893.4	14.5833			#DIV/0!
									893.917	14.5622			#DIV/0!
									894.433	14.0178			#DIV/0!
									894.933	14.0822			#DIV/0!
									895.45	14.0256			#DIV/0!
									895.95	14.83			#DIV/0!
									896.467	14.6367			#DIV/0!
									896.967	14.0378			#DIV/0!
									897.483	13.3333			#DIV/0!
									897.983	13.2733			#DIV/0!
									898.5	13.3233			#DIV/0!
									899	13.8111			#DIV/0!
									899.517	13.6078			#DIV/0!
									900.017	13.6278			#DIV/0!
									900.533	13.35			#DIV/0!
									901.05	13.5067			#DIV/0!
									901.55	13.6089			#DIV/0!
									902.067	14.3556			#DIV/0!
									902.567	14.56			#DIV/0!
									903.083	14.8833			#DIV/0!
									903.583	14.7511			#DIV/0!
									904.1	15.1189			#DIV/0!
									904.6	15.5856			#DIV/0!
									905.117	15.3433			#DIV/0!
									905.617	15.2056			#DIV/0!
									906.133	15.4778			#DIV/0!
									906.65	15.7956			#DIV/0!
									907.15	16.1111			#DIV/0!
									907.667	15.9089			#DIV/0!
									908.167	16.0133			#DIV/0!
									908.683	15.6522			#DIV/0!
									909.183	15.6811			#DIV/0!
									909.7	15.7744			#DIV/0!
									910.2	15.6956			#DIV/0!
									910.717	15.7644			#DIV/0!
									911.217	14.2744			#DIV/0!
									911.733	14.2044			#DIV/0!
									912.25	13.7478			#DIV/0!
									912.75	13.3956			#DIV/0!
									913.267	13.7022			#DIV/0!
									913.767	13.69			#DIV/0!
									914.283	13.2878			#DIV/0!
									914.783	12.9978			#DIV/0!
									915.3	12.9			#DIV/0!
									915.8	13.9244			#DIV/0!
									916.317	13.3356			#DIV/0!
									916.817	13.7844			#DIV/0!
									917.333	14.06			#DIV/0!
									917.833	14.0122			#DIV/0!
									918.35	13.8778			#DIV/0!
									918.867	14.3356			#DIV/0!
									919.367	14.5044			#DIV/0!
									919.883	14.3433			#DIV/0!
									920.383	14.3122			#DIV/0!
									920.9	14.1733			#DIV/0!
									921.4	14.0067			#DIV/0!
									921.917	13.6978			#DIV/0!
									922.417	13.5556			#DIV/0!
									922.933	13.3133			#DIV/0!
									923.433	13.3389			#DIV/0!
									923.95	13.8878			#DIV/0!
									924.467	13.9011			#DIV/0!
									924.967	13.91			#DIV/0!
									925.483	14.8644			#DIV/0!
									925.983	15.0578			#DIV/0!
									926.5	15.38			#DIV/0!
									927	15.4011			#DIV/0!
									927.517	15.6			#DIV/0!
									928.017	15.3667			#DIV/0!
									928.533	15.2611			#DIV/0!
									929.033	15.6422			#DIV/0!
									929.55	15.5511			#DIV/0!
									930.067	14.8622			#DIV/0!
									930.567	14.7122			#DIV/0!
									931.083	14.9278			#DIV/0!
									931.583	15.1956			#DIV/0!
									932.1	15.2733			#DIV/0!
									932.6	15.0989			#DIV/0!
									933.117	14.45			#DIV/0!
									933.617	14.1456			#DIV/0!
									934.133	14.27			#DIV/0!
									934.633	14.6589			#DIV/0!
									935.15	14.7122			#DIV/0!
									935.667	14.1511			#DIV/0!
									936.167	13.4433			#DIV/0!
									936.683	13.1756			#DIV/0!
									937.183	13.0067			#DIV/0!
									937.7	13.6978			#DIV/0!
									938.2	13.27			#DIV/0!
									938.717	12.5556			#DIV/0!
									939.217	12.4922			#DIV/0!
									939.733	12.7244			#DIV/0!
									940.233	13.2044			#DIV/0!
									940.75	13.7333			#DIV/0!
									941.25	14.2811			#DIV/0!
									941.767	14.76			#DIV/0!
									942.283	14.2867			#DIV/0!
									942.783	14.7689			#DIV/0!
									943.3	15.0456			#DIV/0!
									943.8	14.8389			#DIV/0!
									944.317	14.3033			#DIV/0!
									944.817	14.1433			#DIV/0!
									945.333	14.4767			#DIV/0!
									945.833	14.3689			#DIV/0!
									946.35	14.1578			#DIV/0!
									946.85	14.2844			#DIV/0!
									947.367	14.1478			#DIV/0!
									947.883	14.6344			#DIV/0!
									948.383	14.6067			#DIV/0!
									948.9	15.03			#DIV/0!
									949.4	15.4456			#DIV/0!
									949.917	15.2944			#DIV/0!
									950.417	15.0011			#DIV/0!
									950.933	14.1811			#DIV/0!
									951.433	14.3567			#DIV/0!
									951.95	14.4911			#DIV/0!
									952.45	14.1844			#DIV/0!
									952.967	14.5422			#DIV/0!
									953.483	14.3511			#DIV/0!
									953.983	13.6067			#DIV/0!
									954.5	13.0533			#DIV/0!
[truncated: 578 more rows]

## Sheet: Fig. 9
			nmol O2/mL		Filter of Inflow From Matlab Decon
		Time	Inflow	Outflow	0	-0.000206696
		0	205.251	204.556	0.5	-0.000188143
		0.5	205.03	204.706	1	-0.000218678
		1	203.859	204.432	1.5	2.24434e-05
		1.5	201.35	204.526	2	0.00743089
		2	196.328	204.464	2.5	0.0215387
		2.5	189.227	204.597	3	0.0399105
		3	179.577	204.541	3.5	0.059517
		3.5	168.824	204.371	4	0.0774427
		4	157.093	204.596	4.5	0.0913165
		4.5	145.112	204.571	5	0.0995677
		5	133.651	204.275	5.5	0.101578
		5.5	123.131	203.618	6	0.0976448
		6	114.22	201.792	6.5	0.0888336
		6.5	106.542	199.515	7	0.0766995
		7	99.9224	196.07	7.5	0.0629705
		7.5	94.4638	191.243	8	0.0492444
		8	90.3194	185.388	8.5	0.0367592
		8.5	86.6288	177.844	9	0.0262771
		9	83.597	169.631	9.5	0.0180929
		9.5	81.459	160.933	10	0.0121248
		10	79.2554	151.538	10.5	0.00804301
		10.5	77.4629	142.879	11	0.00541072
		11	75.9133	134.161	11.5	0.00379702
		11.5	74.6129	126.049	12	0.00284221
		12	73.2788	118.487	12.5	0.00228224
		12.5	72.1051	111.445	13	0.00193976
		13	71.3579	105.286	13.5	0.00171135
		13.5	70.2851	99.901	14	0.00153521
		14	69.3926	95.0857	14.5	0.00138416
		14.5	68.6774	90.871	15	0.00125345
		15	67.8782	87.3899	15.5	0.00113684
		15.5	67.2226	84.1364	16	0.00102914
		16	66.4524	81.5782	16.5	0.000930251
		16.5	65.9527	79.2325	17	0.000841449
		17	65.4316	77.2978	17.5	0.00075955
		17.5	64.8158	75.4518	18	0.000682541
		18	64.2305	73.589	18.5	0.000608212
		18.5	63.853	72.2304	19	0.000538067
		19	63.3212	71.1118	19.5	0.00047263
		19.5	62.8139	69.7548	20	0.000414204
		20	62.4058	68.87	20.5	0.000362431
		20.5	61.9566	67.8782	21	0.000317895
		21	61.712	66.7397	21.5	0.000279431
		21.5	61.1191	66.0245	22	0.000244786
		22	60.8654	65.1138	22.5	0.000211615
		22.5	60.4681	64.2121	23	0.000180402
		23	60.1747	63.5779	23.5	0.000150412
		23.5	59.9394	62.8735	24	0.000120508
		24	59.6811	62.2805	24.5	9.09776e-05
		24.5	59.2013	61.6525	25	6.09783e-05
		25	59.0148	61.165	25.5	3.11656e-05
		25.5	58.7932	60.6469	26	2.08045e-06
		26	58.3944	60.0845	26.5	-2.3574e-05
		26.5	58.1988	59.6139	27	-4.78706e-05
		27	57.8213	59.2593	27.5	-6.98369e-05
		27.5	57.5371	58.7535	28	-9.07042e-05
		28	57.2299	58.3363	28.5	-0.000109621
		28.5	57.0481	58.0567	29	-0.00012827
		29	56.7959	57.395	29.5	-0.000145071
		29.5	56.663	57.1444	30	-0.00016071
		30	56.3207	56.8051	30.5	-0.000175521
		30.5	56.1892	56.5086	31	-0.000188773
		31	55.9554	56.4781	31.5	-0.000201268
		31.5	55.717	55.9417	32	-0.000212431
		32	55.5596	55.6529	32.5	-0.000223193
		32.5	55.3212	55.3075	33	-0.00023303
		33	55.0737	55.1027	33.5	-0.000242365
		33.5	55.0569	54.8903	34	-0.000251268
		34	54.8445	54.522	34.5	-0.000259651
		34.5	54.6702	54.2821	35	-0.000267648
		35	54.5358	54.0269	35.5	-0.00027515
		35.5	54.1935	53.8252	36	-0.00028228
		36	53.9795	53.6219	36.5	-0.000288867
		36.5	53.8664	53.3499	37	-0.000295206
		37	53.7121	53.2796	37.5	-0.000301173
		37.5	53.5837	53.0076	38	-0.000306955
		38	53.4584	52.8853	38.5	-0.000312853
		38.5	53.1971	52.5675	39	-0.00031839
		39	53.1467	52.4559	39.5	-0.000323579
		39.5	52.9969	52.2664
		40	52.8212	52.0326
