# Supplementary material for: Fluidics system for resolving concentration-dependent effects of dissolved gases on tissue metabolism
Source: eLife journal article supplement (doi:10.7554/elife.66716), 2021-11-02
Supplement: supp [file elife_poa_e66716_Appendix_1_figure_2_source_data_1.xlsx]

## Sheet: Appendix Fig 2A
	H2S in solution from H2S in headspace						H2S in solution from NaHS				H2S in solution, no added H2S (control)
	Time, mintes	2021-05-11	2021-06-18	Average	Smoothed		2021-06-16				2021-06-07	2021-06-14	Average
	-30	-0.0405617	0.0132172	-0.0136722			-0.0138396				-0.0366207	-0.0129067	-0.0247637
	-29.75	-0.0540675	0.00828389	-0.0228918			-0.0198285				-0.043143	-0.01664	-0.0298915
	-29.5	-0.0496028	0.000806111	-0.0243984			-0.0168619				-0.0132096	-0.00252889	-0.00786926
	-29.25	-0.0367381	-0.00332722	-0.0200327			-0.0147174				0.0208348	-0.0120289	0.00440296
	-29	-0.0333087	-0.000582778	-0.0169458			-0.0169174				0.0434237	-0.0215178	0.010953
	-28.75	-0.0283558	-0.0199828	-0.0241693			-0.0166396				0.0717348	-0.00499556	0.0333696
	-28.5	-0.0328499	-0.006205	-0.0195275			-0.0130841				0.066057	-0.00570667	0.0301752
	-28.25	-0.0310499	-0.0173828	-0.0242163			-0.0154952				0.0505348	-0.01184	0.0193474
	-28	-0.0472028	-0.0134272	-0.030315	-0.0217966		-0.016673				0.0416126	-0.00644	0.0175863
	-27.75	-0.0411558	-0.0246272	-0.0328915	-0.023932		-0.0144952				0.0438459	-0.00179556	0.0210252
	-27.5	-0.0371381	-0.00288278	-0.0200105	-0.0236119		-0.0124952				0.0387348	0.000537778	0.0196363
	-27.25	-0.0443911	-0.00398278	-0.0241869	-0.0235884		-0.0104285				0.0289681	-0.00498444	0.0119919
	-27	-0.050544	-0.00173833	-0.0261412	-0.0242671		-0.0100841				0.0336459	0.00893778	0.0212919
	-26.75	-0.0751499	0.00867278	-0.0332386	-0.0260774		-0.0123174				0.0405348	0.00416	0.0223474
	-26.5	-0.0960323	0.0207617	-0.0376353	-0.0275736		-0.0103063				0.0369348	-0.00496222	0.0159863
	-26.25	-0.11355	0.00505056	-0.0542497	-0.0314317		-0.00808407				0.0116459	0.00437111	0.00800852
	-26	-0.124356	-0.00699389	-0.0656748	-0.0360382		-0.00557296				0.00963481	0.00580444	0.00771963
	-25.75	-0.118915	0.000506111	-0.0592042	-0.0392481		-0.00467296				0.029757	0.0105267	0.0201419
	-25.5	-0.091144	0.0295617	-0.0307912	-0.0390147		-0.00128407				0.0163904	0.00841556	0.012403
	-25.25	-0.0923617	0.00702833	-0.0426667	-0.0415321		-0.000128519				0.0131015	0.00680444	0.00995296
	-25	-0.0932911	-0.00306056	-0.0481758	-0.0441975		-0.00132852				0.00351259	0.000548889	0.00203074
	-24.75	-0.0907911	-0.00573833	-0.0482647	-0.0466557		-0.0030063				-0.00715407	-0.00366222	-0.00540815
	-24.5	-0.0808087	-0.0192161	-0.0500124	-0.0485194		-0.000684074				-0.00794296	0.00686	-0.000541481
	-24.25	-0.0568793	-0.018205	-0.0375422	-0.0485091		0.000615926				0.0141126	0.0188044	0.0164585
	-24	-0.0544558	-0.00462722	-0.0295415	-0.0457637		-0.0019063				0.0222348	0.0122711	0.017253
	-23.75	-0.0281499	0.0182506	-0.00494967	-0.0390165		0.00163815				0.0220793	0.0237933	0.0229363
	-23.5	-0.0371793	0.00856167	-0.0143088	-0.0340281		0.00340481				0.00747926	0.0118711	0.00967519
	-23.25	-0.0292793	0.00432833	-0.0124755	-0.031993		0.00348259				-0.0208319	0.00571556	-0.00755815
	-23	-0.0268205	0.0105506	-0.00813497	-0.0281562		0.0055937				-0.0346096	0.00831556	-0.013147
	-22.75	-0.00757931	0.00808389	0.000252288	-0.0227753		0.00547148				-0.0396985	0.0101711	-0.0147637
	-22.5	0.0159677	0.00918389	0.0125758	-0.0160152		0.00570481				-0.00398741	0.00304889	-0.000469259
	-22.25	0.038903	0.012495	0.025699	-0.00760283		0.00663815				-0.0129207	-0.00211778	-0.00751926
	-22	0.054956	0.0193061	0.037131	0.00069419		0.0047937				-0.0631985	-0.00118444	-0.0321915
	-21.75	0.0679501	0.0124061	0.0401781	0.00844081		0.00871593				-0.0573985	0.00374889	-0.0268248
	-21.5	0.0618677	-0.000816111	0.0305258	0.0123825		0.00614926				-0.073943	-0.00789556	-0.0409193
	-21.25	0.0658207	3.94444e-05	0.0329301	0.0176313		0.00776037				-0.0701874	-0.000884444	-0.0355359
	-21	0.0783266	-0.00918278	0.0345719	0.0228588		0.00350481				-0.0561096	0.00484889	-0.0256304
	-20.75	0.0859266	-0.00494944	0.0404886	0.0282614		0.00250481				-0.0593652	0.01236	-0.0235026
	-20.5	0.102827	0.00696167	0.0548941	0.0343327		0.00520481				-0.0588207	0.0175156	-0.0206526
	-20.25	0.0854325	0.0121283	0.0487804	0.0383554		0.00968259				-0.0989874	0.0163489	-0.0413193
	-20	0.0754736	0.0172839	0.0463788	0.0406532		0.00951593				-0.0898207	0.00687111	-0.0414748
	-19.75	0.0867383	0.00282833	0.0447833	0.0415034		0.00741593				-0.0860319	0.00363778	-0.041197
	-19.5	0.0691619	-0.00396056	0.0326007	0.0406615		0.00398259				-0.0883207	0.00991556	-0.0392026
	-19.25	0.0772383	-0.0136606	0.0317889	0.0408019		0.00566037				-0.0406319	0.0178267	-0.0114026
	-19	0.0749207	-0.0152161	0.0298523	0.0404599		0.00738259				-0.0186652	0.0217822	0.00155852
	-18.75	0.089556	-0.0348272	0.0273644	0.039659		0.00854926				0.036257	0.00790444	0.0220807
	-18.5	0.078603	-0.0293717	0.0246157	0.0378954		0.0124604				0.0503793	-0.0190511	0.0156641
	-18.25	0.0647913	-0.036905	0.0139431	0.0333453		0.0117048				0.0496459	-0.0206067	0.0145196
	-18	0.0512619	-0.0295939	0.010834	0.029129		0.0106715				0.0505126	-0.0193956	0.0155585
	-17.75	0.0280619	-0.0375161	-0.00472712	0.0234506		0.0100604				0.0494459	-0.0145622	0.0174419
	-17.5	0.0378677	-0.0213717	0.00824804	0.0193911		0.00990481				0.0859681	-0.0144956	0.0357363
	-17.25	0.0358501	-0.00973833	0.0130559	0.0172195		0.0127159				0.064157	-0.02074	0.0217085
	-17	0.0409325	-0.000782778	0.0200748	0.0159179		0.0104048				0.0546126	-0.0277622	0.0134252
	-16.75	0.0393383	0.0107283	0.0250333	0.0153825		0.00837148				0.0100793	-0.0244067	-0.0071637
	-16.5	0.0378148	0.0265172	0.032166	0.015916		0.00940481				-0.0110985	-0.0144733	-0.0127859
	-16.25	0.0275736	0.0194617	0.0235176	0.015794		0.00713815				-0.0198763	0.00134889	-0.0092637
	-16	0.0355266	0.0322394	0.033883	0.0180095		0.00512704				-0.0016763	0.00101556	-0.00033037
	-15.75	0.0330089	0.0302283	0.0316186	0.0203189		0.00187148				0.0247348	0.00316	0.0139474
	-15.5	0.0418442	0.0272617	0.0345529	0.0246834		0.000438148				0.0126126	0.01036	0.0114863
	-15.25	0.0601677	0.0171394	0.0386536	0.0280618		0.00720481				-0.0409652	0.00798222	-0.0164915
	-15	0.0561795	0.014895	0.0355373	0.0305597		0.00543815				-0.0156985	-0.0121067	-0.0139026
	-14.75	0.0439736	0.0134394	0.0287065	0.0315188		0.00941593				-0.0540874	-0.01134	-0.0327137
	-14.5	0.0375089	-0.0171494	0.0101797	0.0298684		0.0094937				-0.0242096	-0.00564	-0.0149248
	-14.25	0.0234148	-0.0209161	0.00124935	0.0264332		0.00897148				0.000923704	-0.01034	-0.00470815
	-14	0.0106736	-0.0221828	-0.00575458	0.0231807		0.00824926				0.060057	-0.0161844	0.0219363
	-13.75	0.0341089	-0.0138939	0.0101075	0.020539		0.00824926				0.0425681	-0.0281622	0.00720296
	-13.5	0.0373736	-0.024205	0.00658431	0.0177574		0.0118048				0.00584593	-0.04344	-0.018797
	-13.25	0.0188207	-0.0130494	0.00288562	0.0142388		0.0122604				0.0292904	-0.0412733	-0.00599148
	-13	0.012603	-0.0243494	-0.0058732	0.00929139		0.00758259				0.0658681	-0.03034	0.0177641
	-12.75	0.0094501	-0.0204939	-0.0055219	0.00472927		0.00717148				0.0505793	-0.0215289	0.0145252
	-12.5	0.0156383	-0.0163161	-0.000338889	0.001502		0.0057937				0.044257	-0.02064	0.0118085
	-12.25	0.0265677	0.0114617	0.0190147	0.00248366		0.00891593				0.0447681	-0.0332622	0.00575296
	-12	0.0227089	0.0204728	0.0215908	0.00474383		0.012627				-0.00105407	-0.0175844	-0.00931926
	-11.75	0.0456795	0.00846167	0.0270706	0.00839107		0.0150937				-0.0206207	-0.0189622	-0.0197915
	-11.5	0.0485972	0.00311722	0.0258572	0.010141		0.0140493				0.0034237	-0.00252889	0.000447407
	-11.25	0.0300266	-0.00472722	0.0126497	0.010815		0.0159715				0.041957	0.0153822	0.0286696
	-11	0.0333913	0.00880611	0.0210987	0.0128386		0.0201048				0.0350904	0.00669333	0.0208919
	-10.75	0.0438795	0.0239506	0.033915	0.0172595		0.0247048				0.0300015	0.00199333	0.0159974
	-10.5	0.0557736	0.00140611	0.0285899	0.0210497		0.024927				0.0166904	0.0159489	0.0163196
	-10.25	0.0608619	-0.00202722	0.0294173	0.024356		0.027027				0.0257904	0.00538222	0.0155863
	-10	0.0738442	-0.00323833	0.0353029	0.0261658		0.0232826				0.0544459	0.00676	0.030603
	-9.75	0.095956	-0.008905	0.0435255	0.028603		0.0220937				0.0746904	0.0138822	0.0442863
	-9.5	0.089903	-0.004305	0.042799	0.0303506		0.0205826				0.0578459	0.0338156	0.0458307
	-9.25	0.0919972	-0.00789389	0.0420516	0.03215		0.0270715				0.0391459	0.0347822	0.0369641
	-9	0.101103	-0.00876056	0.0461712	0.0358746		0.0220826				0.0340904	0.0382044	0.0361474
	-8.75	0.123238	-0.0269939	0.0481222	0.0388772		0.0205159				0.00254593	0.0392933	0.0209196
	-8.5	0.133268	-0.0273606	0.0529536	0.0409926		0.0211159				0.00136815	0.0374489	0.0194085
	-8.25	0.132532	-0.0159272	0.0583026	0.044294		0.0244381				0.0221904	0.0353044	0.0287474
	-8	0.134903	-0.00284944	0.0660268	0.0483617		0.0255048				0.0465348	0.0552711	0.050903
	-7.75	0.152956	-0.00152722	0.0757144	0.0528519		0.0283159				0.0449237	0.0496267	0.0472752
	-7.5	0.128185	-0.00283833	0.0626735	0.0549794		0.033727				0.0352126	0.0347489	0.0349807
	-7.25	0.142368	0.0120728	0.0772203	0.058804		0.0365937				0.0403459	0.0187711	0.0295585
	-7	0.151291	0.0220617	0.0866765	0.0637623		0.035227				0.0448237	0.00449333	0.0246585
	-6.75	0.148056	0.0455617	0.0968088	0.0693887		0.0398715				0.00975704	0.0102156	0.0099863
	-6.5	0.14155	0.0414839	0.091517	0.0742104		0.0419159				0.037457	0.00343778	0.0204474
	-6.25	0.130991	0.0447061	0.0878487	0.0780876		0.0391604				0.0420793	0.00420444	0.0231419
	-6	0.11835	0.0482394	0.0832948	0.0808645		0.0371937				0.0440237	-0.00932889	0.0173474
	-5.75	0.121174	0.0546617	0.0879176	0.0832968		0.0379381				0.0690793	-0.00989556	0.0295919
	-5.5	0.124156	0.0579172	0.0910366	0.0849993		0.0402381				0.063857	-0.00589556	0.0289807
	-5.25	0.118997	0.0515506	0.0852739	0.0875105		0.0380826				0.122146	-0.00562889	0.0582585
	-5	0.136044	0.0424617	0.0892529	0.0888474		0.0344048				0.131046	0.00874889	0.0698974
	-4.75	0.131744	0.032795	0.0822696	0.0883578		0.0349381				0.125235	0.02286	0.0740474
	-4.5	0.116615	0.0320728	0.0743438	0.0858617		0.0328826				0.148279	0.00479333	0.0765363
	-4.25	0.117768	0.0494617	0.0836147	0.0849836		0.0339159				0.160668	0.0222378	0.091453
	-4	0.115332	0.0465506	0.0809415	0.0842162		0.0369604				0.183457	0.0284044	0.105931
	-3.75	0.118791	0.0442061	0.0814987	0.0840166		0.0399604				0.197935	0.0376044	0.11777
	-3.5	0.0962148	0.0196728	0.0579438	0.0806862		0.0394604				0.183468	0.0429378	0.113203
	-3.25	0.108597	0.00547278	0.057035	0.0769082		0.0387604				0.176101	0.0301378	0.10312
	-3	0.0973383	0.0142283	0.0557833	0.0736315		0.0362048				0.15059	0.0369378	0.0937641
	-2.75	0.0986148	0.0215172	0.060066	0.0703885		0.0433048				0.136301	0.0357044	0.086003
	-2.5	0.103368	0.0258506	0.0646092	0.0684262		0.044327				0.139479	0.0244822	0.0819807
	-2.25	0.0929677	0.0189506	0.0559592	0.0663835		0.0441381				0.13309	0.0426267	0.0878585
	-2	0.103168	0.0197839	0.0614758	0.0639236		0.0440937				0.0983681	0.0354378	0.066903
	-1.75	0.113256	0.0102728	0.0617644	0.0617928		0.0419048				0.0750015	0.02256	0.0487807
	-1.5	0.121297	0.0103394	0.0658183	0.0600505		0.0428159				0.0538237	0.0150378	0.0344307
	-1.25	0.119156	0.0117061	0.065431	0.0608825		0.0419937				0.0757348	0.00036	0.0380474
	-1	0.123427	0.0154506	0.0694386	0.0622606		0.0403826				0.0628126	0.0350489	0.0489307
	-0.75	0.126303	0.0235394	0.0749212	0.0643871		0.0417604				0.0350459	0.02286	0.028953
	-0.5	0.128109	0.0239172	0.0760131	0.066159		0.0381826				0.0358237	0.0181933	0.0270085
	-0.25	0.142185	0.0291839	0.0856846	0.0685007		0.0393493				0.0529348	0.0227267	0.0378307
	0	0.130474	0.0266839	0.0785788	0.071014		0.0427381				0.0753126	0.0191267	0.0472196
	0.25	0.130121	0.00790611	0.0690134	0.0718515		0.0416159				0.076757	0.0345044	0.0556307
	0.5	0.110944	0.0301839	0.0705641	0.0728292		0.0419493				0.0882348	0.0386489	0.0634419
	0.75	0.121497	0.0315172	0.0765072	0.0740169		0.0392826				0.10449	0.0589822	0.0817363
	1	0.117768	0.0510283	0.084398	0.0761243		0.0429826				0.0710126	0.0728378	0.0719252
	1.25	0.114027	0.050695	0.0823608	0.0775601		0.0441937				0.0932237	0.0505933	0.0719085
	1.5	0.12845	0.039795	0.0841225	0.0785825		0.0463493				0.113668	0.0652822	0.0894752
	1.75	0.112332	0.0353617	0.0738471	0.0783418		0.0477159				0.116924	0.0509267	0.0839252
	2	0.143668	0.028395	0.0860314	0.0783804		0.0455604				0.111401	0.0601933	0.0857974
	2.25	0.154874	0.023395	0.0891343	0.0795532		0.0467715				0.105657	0.0465044	0.0760807
	2.5	0.154562	0.0233061	0.088934	0.0817666		0.047827				0.138213	0.0184933	0.078353
	2.75	0.142568	0.00793944	0.0752536	0.0822877		0.0516381				0.145424	0.0166933	0.0810585
	3	0.131197	0.0114172	0.0713072	0.0817099		0.0541826				0.14899	-0.00309556	0.0729474
	3.25	0.133621	0.00863944	0.0711301	0.0802357		0.0506604				0.175935	-0.00834	0.0837974
	3.5	0.118185	0.0146839	0.0664346	0.0784661		0.0530937				0.173513	-0.00491778	0.0842974
	3.75	0.126985	0.0132394	0.0701124	0.0769094		0.0489826				0.147857	-0.0171067	0.0653752
	4	0.129997	0.0126617	0.0713294	0.0766297		0.0519937				0.127579	-0.0138178	0.0568807
	4.25	0.146462	0.0113394	0.0789007	0.0758374		0.0514493				0.118013	-0.0252844	0.0463641
	4.5	0.142703	0.00256167	0.0726324	0.0740038		0.0468048				0.110579	-0.01864	0.0459696
	4.75	0.155709	0.00183944	0.0787742	0.0728749		0.0455159				0.108379	0.00511556	0.0567474
	5	0.155232	-0.00581611	0.0747082	0.0728143		0.0495159				0.0874681	0.0141822	0.0508252
	5.25	0.17428	-0.0117939	0.0812428	0.0739183		0.048627				0.0407126	0.0279489	0.0343307
	5.5	0.185168	-0.0157828	0.0846925	0.0754252		0.0481937				-0.00680963	0.0246489	0.00891963
	5.75	0.165015	-0.0198383	0.0725882	0.076109		0.0441604				-0.0564874	0.0268267	-0.0148304
	6	0.16688	-0.0170161	0.0749317	0.0766444		0.0471381				-0.0529541	0.0290044	-0.0119748
	6.25	0.151085	-0.00792722	0.0715791	0.0766722		0.0461826				-0.0698763	0.0453378	-0.0122693
	6.5	0.150632	0.00253944	0.0765859	0.076415		0.0464715				-0.0792541	0.0533044	-0.0129748
	6.75	0.16365	0.0102172	0.0869337	0.078004		0.0527604				-0.0983985	0.0572822	-0.0205581
	7	0.160421	0.00227278	0.0813467	0.0782899		0.0544493				-0.110399	0.0518822	-0.0292581
	7.25	0.17845	0.0307839	0.104617	0.0816131		0.0488493				-0.112254	0.04196	-0.035147
	7.5	0.178621	0.0337506	0.106186	0.0843845		0.0502715				-0.0883985	0.0338933	-0.0272526
	7.75	0.212762	0.0293839	0.121073	0.0884268		0.0505159				-0.0897319	0.0399822	-0.0248748
	8	0.21195	0.0379728	0.124961	0.094246		0.0550715				-0.0602096	0.0389711	-0.0106193
	8.25	0.207809	0.0409172	0.124363	0.0997384		0.0590604				-0.0403985	0.0499378	0.00476963
	8.5	0.192915	0.0413506	0.117133	0.1048		0.0605493				-0.0118096	0.0332711	0.0107307
	8.75	0.203168	0.039095	0.121131	0.109749		0.0583159				0.015157	0.0282822	0.0217196
	9	0.206385	0.0424061	0.124396	0.113912		0.0567381				0.0395681	0.0306156	0.0350919
	9.25	0.217421	0.061195	0.139308	0.120352		0.0556381				0.0531348	0.0387822	0.0459585
	9.5	0.217415	0.0524061	0.13491	0.123718		0.0536715				0.0421904	0.0369156	0.039553
	9.75	0.208762	0.0502617	0.129512	0.12631		0.0577826				0.0355459	0.0389822	0.0372641
	10	0.206385	0.0579394	0.132162	0.127542		0.0639048				0.0621904	0.0424267	0.0523085
	10.25	0.22728	0.051495	0.139387	0.129145		0.0670159				0.0537681	0.0476267	0.0506974
	10.5	0.226927	0.0567506	0.141839	0.131086		0.0659381				0.033257	0.0445378	0.0388974
	10.75	0.229703	0.0549506	0.142327	0.133886		0.0628381				0.0443348	0.0472044	0.0457696
	11	0.220091	0.0466839	0.133388	0.135248		0.0698381				0.0438904	0.0537044	0.0487974
	11.25	0.238609	0.0599394	0.149274	0.138012		0.0697604				0.0392015	0.0429711	0.0410863
	11.5	0.245985	0.0556061	0.150796	0.139288		0.0745493				-0.00258741	0.0339156	0.0156641
	11.75	0.257521	0.0445839	0.151052	0.141082		0.0810381				0.0225237	0.0407822	0.031653
	12	0.23895	0.0400061	0.139478	0.142189		0.0777826				0.0453904	0.0508156	0.048103
	12.25	0.249856	0.0277617	0.138809	0.142928		0.0751937				0.0495126	0.0465044	0.0480085
	12.5	0.249285	0.0384617	0.143874	0.143426		0.0728826				0.0535015	0.05366	0.0535807
	12.75	0.265727	0.0385839	0.152155	0.144572		0.0723715				0.0456904	0.0443711	0.0450307
	13	0.255385	0.0415283	0.148457	0.145254		0.0764159				0.0235348	0.05966	0.0415974
	13.25	0.253538	0.0518506	0.152694	0.147399		0.0785493				0.0170793	0.0449489	0.0310141
	13.5	0.255562	0.0314283	0.143495	0.146757		0.0796937				0.0282126	0.0612489	0.0447307
	13.75	0.250421	0.038395	0.144408	0.146047		0.0791493				0.0622126	0.07126	0.0667363
	14	0.264515	0.041495	0.153005	0.146264		0.077727				0.0801681	0.0708378	0.075503
	14.25	0.274685	0.0487394	0.161712	0.148734		0.0807381				0.0587015	0.0673933	0.0630474
	14.5	0.271621	0.0574061	0.164513	0.15159		0.0846493				0.0805015	0.0578156	0.0691585
	14.75	0.27245	0.0396728	0.156061	0.152945		0.0856159				0.0756015	0.0483156	0.0619585
	15	0.262444	0.0466839	0.154564	0.153212		0.0831826				0.0721237	0.04416	0.0581419
	15.25	0.278474	0.0563728	0.167423	0.15532		0.0829826				0.0596793	0.03176	0.0457196
	15.5	0.274274	0.0499283	0.162101	0.156365		0.0803826				0.0465459	0.0555156	0.0510307
	15.75	0.257644	0.0595617	0.158603	0.158043		0.0809493				0.0219237	0.04406	0.0329919
	16	0.266874	0.0649728	0.165923	0.160434		0.0824493				0.0274237	0.0310489	0.0292363
	16.25	0.26505	0.0800283	0.172539	0.162605		0.0819715				-0.00156519	0.0335711	0.016003
	16.5	0.262621	0.0799283	0.171275	0.163667		0.0791159				0.030757	0.0361933	0.0334752
	16.75	0.27565	0.0662839	0.170967	0.164384		0.0788826				-0.0127319	0.0474378	0.017353
	17	0.272438	0.0819839	0.177211	0.166734		0.0812493				0.0232459	0.0571156	0.0401807
	17.25	0.282568	0.064195	0.173381	0.168825		0.0874715				0.0324015	0.0758822	0.0541419
	17.5	0.301438	0.061895	0.181667	0.170407		0.0857048				0.0393015	0.0803044	0.059803
	17.75	0.30978	0.057195	0.183487	0.172784		0.0880381				0.0364015	0.0660156	0.0512085
	18	0.311562	0.0678839	0.189723	0.176241		0.0924715				0.0280015	0.0646711	0.0463363
	18.25	0.31048	0.0593172	0.184898	0.17835		0.0929159				0.0346126	0.08126	0.0579363
	18.5	0.321415	0.0553839	0.188399	0.180112		0.0937604				0.0456348	0.08216	0.0638974
	18.75	0.327809	0.0680283	0.197919	0.183073		0.097327				0.00746815	0.0753378	0.041403
	19	0.34658	0.0973839	0.221982	0.188741		0.0950937				0.0231348	0.0714156	0.0472752
	19.25	0.366162	0.091295	0.228728	0.194465		0.0976048				-0.0124763	0.0653044	0.0264141
	19.5	0.372162	0.110906	0.241534	0.202037		0.0959381				-0.00780963	0.0579378	0.0250641
	19.75	0.372727	0.0954728	0.2341	0.207863		0.100983				0.000301481	0.0677711	0.0340363
	20	0.390238	0.0947617	0.2425	0.21442		0.101471				0.021757	0.0728378	0.0472974
	20.25	0.381532	0.101351	0.241442	0.220167		0.0967715				0.0245348	0.0797933	0.0521641
	20.5	0.386909	0.102973	0.244941	0.226838		0.0974381				0.0159904	0.0717378	0.0438641
	20.75	0.376974	0.096495	0.236734	0.232209		0.096827				0.0156681	0.0728933	0.0442807
	21	0.366903	0.0883617	0.227632	0.23551		0.0982937				0.0712681	0.07776	0.0745141
	21.25	0.366221	0.0722172	0.219219	0.235203		0.101583				0.0616459	0.08416	0.072903
	21.5	0.36278	0.0725506	0.217665	0.233974		0.101283				0.0724348	0.0804044	0.0764196
	21.75	0.355115	0.0655617	0.210338	0.230508		0.103249				0.0688904	0.0878044	0.0783474
	22	0.353509	0.0721394	0.212824	0.228144		0.101294				0.0813348	0.0844156	0.0828752
	22.25	0.353115	0.0755394	0.214327	0.225014		0.100883				0.0716681	0.0758711	0.0737696
	22.5	0.341997	0.0844506	0.213224	0.221878		0.103683				0.119279	0.0673489	0.0933141
	22.75	0.353862	0.0961394	0.225001	0.219663		0.106905				0.0890904	0.0691156	0.079103
	23	0.358874	0.102528	0.230701	0.218992		0.110483				0.0664904	0.0672822	0.0668863
	23.25	0.361891	0.116651	0.239271	0.220286		0.107727				0.0200459	0.0818156	0.0509307
	23.5	0.345774	0.132406	0.23909	0.222493		0.10726				0.048457	0.0777044	0.0630807
	23.75	0.343444	0.143006	0.243225	0.225333		0.107027				0.0608126	0.0779378	0.0693752
	24	0.345356	0.151028	0.248192	0.229539		0.106805				0.0727237	0.0653378	0.0690307
	24.25	0.345121	0.151173	0.248147	0.233464		0.110283				0.0752459	0.0668044	0.0710252
	24.5	0.336032	0.161895	0.248964	0.237313		0.107083				0.0509459	0.0745267	0.0627363
	24.75	0.34485	0.157884	0.251367	0.241551		0.106194				0.0159348	0.0756267	0.0457807
	25	0.363732	0.169906	0.266819	0.246197		0.106049				0.0631681	0.0631267	0.0631474
	25.25	0.375068	0.188251	0.281659	0.251859		0.105927				0.0767904	0.0570156	0.066903
	25.5	0.372803	0.182339	0.277571	0.256115		0.11026				0.0938904	0.0432933	0.0685919
	25.75	0.376227	0.176051	0.276139	0.260231		0.107749				0.0511237	0.0342711	0.0426974
	26	0.372915	0.176606	0.27476	0.263735		0.105738				0.00823481	0.0375711	0.022903
	26.25	0.372609	0.192417	0.282513	0.267549		0.106694				-0.0374763	0.0392156	0.00086963
	26.5	0.380668	0.196339	0.288504	0.272033		0.104483				-0.0138541	0.0274933	0.00681963
	26.75	0.394185	0.205062	0.299624	0.277662		0.107216				0.0148237	0.0285378	0.0216807
	27	0.391697	0.204428	0.298063	0.28285		0.110116				0.00293481	0.0301156	0.0165252
	27.25	0.399638	0.196806	0.298222	0.286339		0.107138				-0.0216096	0.0319267	0.00515852
	27.5	0.392621	0.184139	0.28838	0.287086		0.107949				-0.0340763	0.0433044	0.00461407
	27.75	0.399997	0.190684	0.295341	0.289061		0.105383				-0.068343	0.0444822	-0.0119304
	28	0.393921	0.191473	0.292697	0.2909		0.110916				-0.0396763	0.0568267	0.00857519
	28.25	0.402503	0.198484	0.300493	0.29376		0.109949				0.00974593	0.0624378	0.0360919
	28.5	0.42498	0.181606	0.303293	0.296068		0.108871				0.050157	0.0478489	0.049003
	28.75	0.441085	0.179728	0.310407	0.298502		0.108283				0.0349126	0.0486822	0.0417974
	29	0.448868	0.164351	0.306609	0.299278		0.108271				0.0228348	0.0498156	0.0363252
	29.25	0.444085	0.151673	0.297879	0.299258		0.105971				0.00916815	0.0593156	0.0342419
	29.5	0.457109	0.158284	0.307696	0.300311		0.104627				0.00506815	0.04676	0.0259141
	29.75	0.47838	0.163117	0.320748	0.303907		0.103849				-8.74074e-05	0.05286	0.0263863
	30	0.499968	0.161395	0.330681	0.307834		0.103783				0.0467015	0.0546489	0.0506752
	30.25	0.518444	0.185784	0.352114	0.314436		0.0992826				0.040857	0.0537933	0.0473252
	30.5	0.530803	0.177251	0.354027	0.320384		0.102083				0.0212904	0.0482267	0.0347585
	30.75	0.542656	0.203573	0.373114	0.328142		0.104116				0.0517459	0.0747156	0.0632307
	31	0.547315	0.211417	0.379366	0.335804		0.103583				0.0287015	0.08086	0.0547807
	31.25	0.540274	0.238873	0.389573	0.345022		0.106638				0.0322793	0.0698822	0.0510807
	31.5	0.555897	0.269962	0.412929	0.357806		0.10986				0.068257	0.0542267	0.0612419
	31.75	0.570109	0.271328	0.420719	0.370364		0.115305				0.0280237	0.0751933	0.0516085
	32	0.594109	0.272717	0.433413	0.382882		0.114827				0.0370459	0.07626	0.056653
	32.25	0.613374	0.282906	0.44814	0.395933		0.113727				0.0250681	0.0658267	0.0454474
	32.5	0.621697	0.273128	0.447413	0.406522		0.117749				0.0165348	0.0687156	0.0426252
	32.75	0.605032	0.292284	0.448658	0.417036		0.119549				0.0119904	0.0734489	0.0427196
	33	0.626527	0.276773	0.45165	0.425762		0.120316				-0.00162074	0.0784378	0.0384085
	33.25	0.651985	0.276728	0.464357	0.435206		0.125427				0.0271126	0.0778156	0.0524641
	33.5	0.672732	0.275106	0.473919	0.444578		0.125227				0.00260148	0.0804044	0.041503
	33.75	0.691303	0.274795	0.483049	0.452369		0.127005				-0.0452319	0.0929267	0.0238474
	34	0.702444	0.291362	0.496903	0.460834		0.124716				0.00439037	0.0924489	0.0484196
	34.25	0.72818	0.309695	0.518937	0.470336		0.125771				0.00467926	0.0671044	0.0358919
	34.5	0.750821	0.323362	0.537091	0.48022		0.130849				-0.0204652	0.0661711	0.022853
	34.75	0.762891	0.337784	0.550338	0.491656		0.128683				0.0031237	0.0513711	0.0272474
	35	0.780797	0.344573	0.562685	0.504325		0.126494				0.0205126	0.0588156	0.0396641
	35.25	0.812097	0.361462	0.586779	0.51934		0.123049				-0.00174296	0.0514378	0.0248474
	35.5	0.840115	0.385739	0.612927	0.535848		0.122505				-0.0514319	0.0530044	0.000786296
	35.75	0.842238	0.399962	0.6211	0.552201		0.121683				-0.0356319	0.06946	0.0169141
	36	0.858144	0.393773	0.625958	0.56808		0.12046				-0.0129763	0.0662267	0.0266252
	36.25	0.867603	0.384495	0.626049	0.582429		0.120138				-0.0342985	0.0538044	0.00975296
	36.5	0.881203	0.366206	0.623705	0.59407		0.11806				-0.0208319	0.05266	0.0159141
	36.75	0.899656	0.379817	0.639737	0.605475		0.115605				-0.0321874	0.0597378	0.0137752
	37	0.913997	0.379351	0.646674	0.616179		0.115849				-0.0583763	0.0640156	0.00281963
	37.25	0.908956	0.385406	0.647181	0.625568		0.117538				-0.0749096	0.0495267	-0.0126915
	37.5	0.899227	0.383628	0.641427	0.63164		0.121438				-0.0497541	0.0555822	0.00291407
	37.75	0.911197	0.393617	0.652407	0.636026		0.120005				-0.00998741	0.0523933	0.021203
	38	0.910715	0.402962	0.656838	0.639997		0.124116				0.0323015	0.0408044	0.036553
	38.25	0.899197	0.429206	0.664202	0.644247		0.12116				0.0475348	0.0463156	0.0469252
	38.5	0.89625	0.435973	0.666111	0.648698		0.123583				0.0557904	0.0471378	0.0514641
	38.75	0.891244	0.468328	0.679786	0.654929		0.128916				0.081657	0.05446	0.0680585
	39	0.908068	0.447006	0.677537	0.659129		0.128171				0.140913	0.0564711	0.0986919
	39.25	0.909562	0.469539	0.689551	0.663893		0.127671				0.141746	0.0596933	0.10072
	39.5	0.914056	0.477317	0.695687	0.669283		0.126016				0.175124	0.0586822	0.116903
	39.75	0.918685	0.484951	0.701818	0.675993		0.122616				0.173424	0.0533156	0.11337
	40	0.922415	0.484151	0.703283	0.681646		0.119583				0.165568	0.0517933	0.108681
	40.25	0.943815	0.479339	0.711577	0.687728		0.117594				0.159768	0.0560378	0.107903
	40.5	0.961456	0.478695	0.720075	0.693936		0.123294				0.152468	0.0578822	0.105175
	40.75	0.976262	0.502695	0.739478	0.702088		0.122194				0.168479	0.0465933	0.107536
	41	0.99695	0.522684	0.759817	0.71098		0.122283				0.106824	0.0462378	0.0765307
	41.25	1.01186	0.555384	0.783623	0.722768		0.124383				0.132624	0.0384933	0.0855585
	41.5	1.04269	0.555795	0.79924	0.734955		0.12546				0.145401	0.0473822	0.0963919
	41.75	1.06954	0.557273	0.813406	0.748035		0.121227				0.104279	0.0517822	0.0780307
	42	1.0946	0.587828	0.841213	0.763524		0.121249				0.0836237	0.0416489	0.0626363
	42.25	1.10806	0.604939	0.856498	0.780547		0.125883				0.0626237	0.0455489	0.0540863
	42.5	1.14599	0.622462	0.884226	0.799731		0.123494				0.0550348	0.0416044	0.0483196
	42.75	1.1716	0.639539	0.905571	0.820341		0.121016				0.0376681	0.0260822	0.0318752
	43	1.19915	0.650117	0.924634	0.840914		0.120638				0.0287237	0.0542044	0.0414641
	43.25	1.20819	0.655884	0.932038	0.86005		0.118794				0.0353015	0.05466	0.0449807
	43.5	1.22097	0.673739	0.947354	0.878242		0.116849				-0.027443	0.0565822	0.0145696
	43.75	1.23534	0.685628	0.960486	0.896158		0.119249				-0.0564652	0.0547822	-0.000841481
	44	1.26501	0.706451	0.985733	0.915306		0.125971				-0.0773652	0.0436156	-0.0168748
	44.25	1.30096	0.707484	1.00422	0.933418		0.127038				-0.0793985	0.0408711	-0.0192637
	44.5	1.30336	0.709639	1.0065	0.950084		0.128383				-0.0810652	0.0511156	-0.0149748
	44.75	1.31436	0.719206	1.01678	0.964813		0.128438				-0.0958319	0.0776822	-0.00907481
	45	1.32891	0.746539	1.03773	0.979497		0.126871				-0.100865	0.0832267	-0.00881926
	45.25	1.33277	0.763506	1.04814	0.993219		0.128016				-0.0942319	0.0630156	-0.0156081
	45.5	1.36444	0.768273	1.06636	1.00814		0.131183				-0.0324985	0.0730489	0.0202752
	45.75	1.3716	0.774273	1.07293	1.0221		0.131783				-0.014943	0.0840933	0.0345752
	46	1.39306	0.788617	1.09084	1.03658		0.131949				0.0170793	0.08576	0.0514196
	46.25	1.39207	0.800706	1.09639	1.04888		0.131971				0.0600015	0.0966044	0.078303
	46.5	1.4093	0.811573	1.11044	1.06068		0.134094				0.0831904	0.103938	0.0935641
	46.75	1.42451	0.843051	1.13378	1.07482		0.130683				0.12889	0.09356	0.111225
	47	1.41739	0.874473	1.14593	1.08917		0.130927				0.12709	0.0576711	0.0923807
	47.25	1.43538	0.872195	1.15379	1.10207		0.13176				0.196857	0.0497378	0.123297
	47.5	1.4658	0.873462	1.16963	1.11557		0.132471				0.199224	0.0670044	0.133114
	47.75	1.49302	0.907351	1.20019	1.13043		0.128871				0.125324	0.0640711	0.0946974
	48	1.52611	0.906917	1.21651	1.14639		0.129594				0.136879	0.0511267	0.094003
	48.25	1.54267	0.929317	1.23599	1.16252		0.128683				0.131224	0.0463267	0.0887752
	48.5	1.56031	0.948428	1.25437	1.18007		0.125494				0.0912459	0.05036	0.070803
	48.75	1.58548	0.955106	1.27029	1.19783		0.125627				0.0523904	0.0588044	0.0555974
	49	1.6061	0.943095	1.2746	1.21348		0.128038				0.00705704	0.0566156	0.0318363
	49.25	1.62416	0.946673	1.28541	1.22898		0.130871				0.0039237	0.0749822	0.039453
	49.5	1.65623	0.951751	1.30399	1.24567		0.133205				-0.0066763	0.0938822	0.043603
	49.75	1.6715	0.970106	1.3208	1.26246		0.132283				-0.0205763	0.0831711	0.0312974
	50	1.70841	0.951806	1.33011	1.2769		0.133038				0.0335237	0.08536	0.0594419
	50.25	1.72845	0.977417	1.35293	1.29206		0.134338				0.0142126	0.0774933	0.045853
	50.5	1.76154	0.970251	1.36589	1.30649		0.13386				0.0104126	0.0882933	0.049353
	50.75	1.7939	0.986562	1.39023	1.32158		0.136149				0.0527126	0.0811933	0.066953
	51	1.82126	1.00546	1.41336	1.33748		0.134449				0.0937904	0.0829933	0.0883919
	51.25	1.86354	1.04008	1.45181	1.35717		0.133816				0.116301	0.0880267	0.102164
	51.5	1.87795	1.05339	1.46567	1.3772		0.135405				0.116724	0.0893822	0.103053
	51.75	1.89986	1.07281	1.48633	1.39746		0.13166				0.113424	0.0905044	0.101964
	52	1.93429	1.09668	1.51549	1.41909		0.132716				0.117535	0.101382	0.109459
	52.25	1.96801	1.11315	1.54058	1.44248		0.131694				0.113035	0.107338	0.110186
	52.5	1.99252	1.11705	1.55479	1.46491		0.133527				0.0939237	0.115782	0.104853
	52.75	2.00623	1.14702	1.57662	1.48832		0.132627				0.0695681	0.101049	0.0853085
	53	2.03912	1.16147	1.6003	1.51166		0.132338				0.0583681	0.101182	0.0797752
	53.25	2.07227	1.19578	1.63403	1.53618		0.13066				0.0598793	0.0968378	0.0783585
	53.5	2.10847	1.22222	1.66534	1.5599		0.131683				0.0896793	0.0965267	0.093103
	53.75	2.13253	1.23982	1.68617	1.58441		0.129438				0.0877348	0.0824933	0.0851141
	54	2.15995	1.26244	1.71119	1.60939		0.13486				0.0740015	0.0797489	0.0768752
	54.25	2.17211	1.26306	1.71759	1.63185		0.134883				0.12089	0.0702933	0.0955919
	54.5	2.18077	1.29837	1.73957	1.65396		0.139705				0.126979	0.0676156	0.0972974
	54.75	2.20883	1.32073	1.76478	1.67729		0.134894				0.132913	0.05896	0.0959363
	55	2.2384	1.33983	1.78911	1.7009		0.137083				0.159846	0.0600489	0.109947
	55.25	2.27934	1.36271	1.82102	1.72542		0.137305				0.19159	0.0650378	0.128314
	55.5	2.29596	1.37564	1.8358	1.74784		0.143438				0.156535	0.0564933	0.106514
	55.75	2.33733	1.39241	1.86487	1.77001		0.139483				0.108657	0.0477378	0.0781974
	56	2.36347	1.41332	1.88839	1.79248		0.142294				0.112046	0.0563156	0.0841807
	56.25	2.38195	1.41892	1.90043	1.81351		0.141605				0.117201	0.0587267	0.0879641
	56.5	2.40119	1.44051	1.92085	1.83609		0.139838				0.0610015	0.0514044	0.056203
	56.75	2.41777	1.46026	1.93901	1.85825		0.138694				0.0588015	0.0491933	0.0539974
	57	2.45043	1.48689	1.96866	1.88091		0.143227				0.0797459	0.0637044	0.0717252
	57.25	2.46991	1.50335	1.98663	1.90285		0.144627				0.090857	0.0611044	0.0759807
	57.5	2.49324	1.52087	2.00706	1.92352		0.146594				0.0791459	0.06686	0.073003
	57.75	2.52177	1.55472	2.03825	1.94602		0.144694				0.140835	0.0631156	0.101975
	58	2.55467	1.57999	2.06733	1.96851		0.147316				0.139346	0.0778156	0.108581
	58.25	2.58189	1.59281	2.08735	1.99062		0.143516				0.127479	0.0754044	0.101442
	58.5	2.61504	1.62785	2.12145	2.01518		0.140483				0.123901	0.0795489	0.101725
	58.75	2.6471	1.65317	2.15013	2.04065		0.144671				0.117713	0.0921044	0.104909
	59	2.67726	1.68755	2.18241	2.0677		0.14066				0.101924	0.10046	0.101192
	59.25	2.71282	1.70902	2.21092	2.09461		0.140394				0.105346	0.102049	0.103697
	59.5	2.73073	1.73886	2.2348	2.12219		0.138527				0.0812459	0.0927489	0.0869974
	59.75	2.77673	1.75253	2.26463	2.15081		0.13986				0.0915459	0.0801822	0.0858641
	60	2.7983	1.77173	2.28501	2.17823		0.141749				0.0493793	0.101471	0.0754252
	60.25	2.83616	1.78834	2.31225	2.20544		0.142294				0.0931459	0.0941156	0.0936307
	60.5	2.86729	1.83954	2.35341	2.235		0.141105				0.105201	0.0830156	0.0941085
	60.75	2.89971	1.87673	2.38822	2.26464		0.143238				0.0918459	0.0702489	0.0810474
	61	2.94383	1.91351	2.42867	2.29559		0.140827				0.104946	0.0682044	0.0865752
	61.25	2.98708	1.93271	2.45989	2.32642		0.14246				0.125224	0.0557933	0.0905085
	61.5	3.04359	1.97908	2.51134	2.3598		0.144683				0.123079	0.0522822	0.0876807
	61.75	3.10803	2.00355	2.55579	2.39547		0.144983				0.115779	0.0732489	0.0945141
	62	3.14981	2.05394	2.60188	2.43294		0.143571				0.0603459	0.0824489	0.0713974
	62.25	3.19911	2.08068	2.6399	2.47237		0.142705				0.0723681	0.0648156	0.0685919
	62.5	3.2453	2.10332	2.67431	2.5126		0.144283				0.0268681	0.07336	0.0501141
	62.75	3.29251	2.12572	2.70911	2.55212		0.148571				0.0113681	0.0901267	0.0507474
	63	3.33343	2.16488	2.74916	2.59223		0.15306				0.0135681	0.0854267	0.0494974
	63.25	3.36476	2.20138	2.78307	2.6316		0.15356				0.0293348	0.0828156	0.0560752
	63.5	3.39286	2.23395	2.81341	2.67088		0.155627				-0.012443	0.10306	0.0453085
	63.75	3.42881	2.25567	2.84224	2.70765		0.150471				-0.00879852	0.104338	0.0477696
	64	3.45646	2.29418	2.87532	2.74315		0.151571				0.0298126	0.0986267	0.0642196
	64.25	3.47724	2.32194	2.89959	2.77623		0.152505				0.0469904	0.105027	0.0760085
	64.5	3.50859	2.35854	2.93357	2.80886		0.151316				0.0267237	0.0985267	0.0626252
	64.75	3.54292	2.39204	2.96748	2.84144		0.150171				0.0403681	0.0858933	0.0631307
	65	3.56231	2.42145	2.99188	2.87286		0.146538				0.0359793	0.0905044	0.0632419
	65.25	3.60617	2.43262	3.01939	2.90288		0.140471				0.0481126	0.0941267	0.0711196
	65.5	3.62811	2.46847	3.04829	2.93235		0.13926				0.0535348	0.0953711	0.074453
	65.75	3.63282	2.5083	3.07056	2.96092		0.13946				0.0950348	0.0751711	0.085103
	66	3.63657	2.55679	3.09668	2.9892		0.146883				0.104257	0.0779156	0.0910863
	66.25	3.64584	2.58727	3.11656	3.016		0.147083				0.0777904	0.0850822	0.0814363
	66.5	3.65464	2.63135	3.14299	3.04304		0.146249				0.105179	0.0691267	0.087153
	66.75	3.67556	2.66291	3.16923	3.06923		0.144905				0.0977459	0.0848933	0.0913196
	67	3.71099	2.72628	3.21863	3.09714		0.145983				0.095157	0.0783378	0.0867474
	67.25	3.74254	2.76795	3.25524	3.1264		0.150749				0.10039	0.0688822	0.0846363
	67.5	3.78627	2.80833	3.2973	3.15728		0.153538				0.0869348	0.0738711	0.080403
	67.75	3.81717	2.84565	3.33141	3.18873		0.154583				0.0831015	0.0698267	0.0764641
	68	3.84636	2.87173	3.35905	3.22079		0.156649				0.0569237	0.0801933	0.0685585
	68.25	3.87797	2.89911	3.38854	3.25322		0.157749				0.0372681	0.0698822	0.0535752
	68.5	3.93317	2.94101	3.43709	3.28883		0.158038				0.067757	0.06966	0.0687085
	68.75	3.97342	2.97588	3.47465	3.32568		0.158005				0.0553126	0.0754044	0.0653585
	69	4.00877	3.02549	3.51713	3.36434		0.161138				0.084157	0.0795489	0.081853
	69.25	4.05741	3.05009	3.55375	3.40157		0.16206				0.0990793	0.0921044	0.0955919
	69.5	4.08603	3.09152	3.58877	3.43863		0.163749				0.136457	0.10046	0.118459
	69.75	4.13407	3.13565	3.63486	3.47614		0.162638				0.139479	0.102049	0.120764
	70	4.18237	3.15185	3.66711	3.51344		0.163638				0.142068	0.0927489	0.117409
	70.25	4.23045	3.18509	3.70777	3.55219		0.162827				0.184957	0.0801822	0.13257
	70.5	4.29641	3.21849	3.75745	3.59318		0.160483				0.17389	0.101471	0.137681
	70.75	4.35224	3.25258	3.80241	3.63377		0.158638				0.150468	0.0941156	0.122292
	71	4.41141	3.27468	3.84305	3.6747		0.161383				0.141579	0.0830156	0.112297
	71.25	4.44907	3.30118	3.87513	3.71448		0.162838				0.133457	0.0702489	0.101853
	71.5	4.5105	3.32668	3.91859	3.75502		0.163894				0.128579	0.0682044	0.0983919
	71.75	4.55016	3.34468	3.94742	3.79487		0.160794				0.104579	0.0557933	0.0801863
	72	4.59398	3.36911	3.98154	3.83339		0.161983				0.105035	0.0522822	0.0786585
	72.25	4.63229	3.41031	4.0213	3.87274		0.165138				0.118246	0.0732489	0.0957474
	72.5	4.68278	3.45147	4.06713	3.91267		0.162549				0.099157	0.0824489	0.090803
	72.75	4.72651	3.48774	4.10713	3.95152		0.159494				0.136679	0.0648156	0.100747
	73	4.74475	3.51048	4.12762	3.98766		0.159794				0.128779	0.07336	0.10107
	73.25	4.78349	3.53125	4.15737	4.02258		0.158971				0.155924	0.0901267	0.123025
	73.5	4.80697	3.56036	4.18367	4.05686		0.153749				0.141646	0.0854267	0.113536
	73.75	4.83633	3.59632	4.21632	4.08994		0.152505				0.136701	0.0828156	0.109759
	74	4.8477	3.65435	4.25102	4.12368		0.156883				0.130768	0.10306	0.116914
	74.25	4.8643	3.69724	4.28077	4.15692		0.160471				0.122546	0.104338	0.113442
	74.5	4.86294	3.73578	4.29936	4.18782		0.157971				0.102435	0.0986267	0.100531
	74.75	4.83549	3.75223	4.29386	4.21301		0.161838				0.0281681	0.105027	0.0665974
	75	4.82975	3.76404	4.29689	4.2341		0.162116				-0.00692074	0.0888822	0.0409807
	75.25	4.82021	3.79352	4.30686	4.25401		0.166483				0.0200015	0.0704933	0.0452474
	75.5	4.82626	3.84536	4.33581	4.27384		0.168438				0.0160348	0.0597156	0.0378752
	75.75	4.81509	3.85379	4.33444	4.29059		0.171127				0.0285126	0.0716711	0.0500919
	76	4.81058	3.86658	4.33858	4.30418		0.173594				0.0510015	0.0742489	0.0626252
	76.25	4.79824	3.87222	4.33523	4.31353		0.172249				0.0532793	0.0521711	0.0527252
	76.5	4.7948	3.91656	4.35568	4.32186		0.170094				0.0483459	0.0503378	0.0493419
	76.75	4.78956	3.94654	4.36805	4.32949		0.172227				0.0213015	0.0475378	0.0344196
	77	4.76413	3.98855	4.37634	4.33865		0.174394				0.0928348	0.0260822	0.0594585
	77.25	4.76339	4.03124	4.39732	4.34981		0.175116				0.106568	0.0542044	0.0803863
	77.5	4.74637	4.05808	4.40223	4.36041		0.175383				0.0925126	0.05466	0.0735863
	77.75	4.72947	4.07424	4.40186	4.36775		0.172649				0.0821793	0.0565822	0.0693807
	78	4.70333	4.12246	4.41289	4.37646		0.172983				0.0969015	0.0547822	0.0758419
	78.25	4.70338	4.15224	4.42781	4.38638		0.174171				0.0812904	0.0436156	0.062453
	78.5	4.69956	4.16918	4.43437	4.39739		0.174227				0.0981126	0.0408711	0.0694919
	78.75	4.71196	4.17082	4.44139	4.40692		0.176016				0.118146	0.0511156	0.0846307
	79	4.75019	4.19603	4.47311	4.41859		0.17606				0.158379	0.0776822	0.118031
	79.25	4.74792	4.20689	4.47741	4.42982		0.17396				0.150913	0.0832267	0.11707
	79.5	4.74569	4.22225	4.48397	4.43945		0.174816				0.127201	0.0630156	0.0951085
	79.75	4.75752	4.26013	4.50882	4.45129		0.172383				0.124101	0.0817267	0.102914
	80	4.75896	4.26346	4.51121	4.46344		0.168171				0.112679	0.0878489	0.100264
	80.25	4.77673	4.26884	4.52278	4.47565		0.170905				0.0924793	0.0699711	0.0812252
	80.5	4.79449	4.30409	4.54929	4.48915		0.170438				0.110846	0.07606	0.093453
	80.75	4.82279	4.32664	4.57472	4.50474		0.168294				0.122635	0.0982933	0.110464
	81	4.85923	4.34955	4.60439	4.52286		0.166594				0.091757	0.0890378	0.0903974
	81.25	4.8882	4.36239	4.6253	4.53977		0.167994				0.0631237	0.0539044	0.0585141
	81.5	4.9166	4.39566	4.65613	4.55962		0.165916				0.0617904	0.0570378	0.0594141
	81.75	4.95939	4.42091	4.69015	4.58253		0.168171				0.101157	0.0682044	0.0846807
	82	4.99309	4.42956	4.71132	4.60503		0.172727				0.111157	0.0646933	0.0879252
	82.25	5.02094	4.47823	4.74958	4.63152		0.180571				0.12349	0.0544933	0.0889919
	82.5	5.04761	4.51177	4.77969	4.66006		0.181683				0.133335	0.0665933	0.0999641
	82.75	5.06367	4.53068	4.79718	4.68761		0.181183				0.14279	0.0889933	0.115892
	83	5.06919	4.56537	4.81728	4.71456		0.182894				0.12689	0.0752711	0.101081
	83.25	5.06196	4.58766	4.82481	4.73905		0.182038				0.161535	0.0555044	0.10852
	83.5	5.07427	4.61209	4.84318	4.76326		0.181116				0.166479	0.0668378	0.116659
	83.75	5.06552	4.64226	4.85389	4.78523		0.182283				0.154501	0.0513489	0.102925
	84	5.03962	4.66996	4.85479	4.80353		0.181216				0.149635	0.0456267	0.0976307
	84.25	5.02461	4.69502	4.85982	4.82003		0.178538				0.161057	0.0403267	0.100692
	84.5	4.99713	4.72218	4.85966	4.83226		0.178983				0.16259	0.0388822	0.100736
	84.75	4.98139	4.74799	4.86469	4.8417		0.175216				0.154679	0.0448822	0.0997807
	85	4.96156	4.77036	4.86596	4.84934		0.174694				0.125268	0.0339933	0.0796307
	85.25	4.92167	4.79189	4.85678	4.85373		0.175505				0.0937015	0.0399933	0.0668474
	85.5	4.89377	4.80936	4.85156	4.8567		0.176283				0.125113	0.0598156	0.0924641
	85.75	4.86936	4.82152	4.84544	4.85696		0.171338				0.159379	0.0573156	0.108347
	86	4.82074	4.83553	4.82814	4.85409		0.171338				0.168301	0.0846378	0.12647
	86.25	4.7914	4.85287	4.82213	4.85047		0.172038				0.162424	0.0830822	0.122753
	86.5	4.76564	4.87968	4.82266	4.84634		0.175549				0.132457	0.0715711	0.102014
	86.75	4.73343	4.8769	4.80516	4.84028		0.178327				0.130246	0.0810044	0.105625
	87	4.72646	4.90448	4.81547	4.83481		0.181894				0.10699	0.0707267	0.0888585
	87.25	4.71072	4.92955	4.82014	4.82972		0.182927				0.129235	0.0690156	0.0991252
	87.5	4.70072	4.94916	4.82494	4.82618		0.184949				0.159946	0.0723711	0.116159
	87.75	4.69572	4.96783	4.83177	4.82398		0.185594				0.11909	0.0730933	0.0960919
	88	4.70999	4.99962	4.8548	4.82502		0.188505				0.124368	0.0767044	0.100536
	88.25	4.71769	5.01986	4.86878	4.82954		0.191516				0.122235	0.0642044	0.0932196
	88.5	4.73151	5.04455	4.88803	4.83686		0.194594				0.123513	0.0674267	0.0954696
	88.75	4.76324	5.06637	4.91481	4.8471		0.195838				0.145557	0.0812711	0.113414
	89	4.79731	5.09347	4.94539	4.86268		0.193427				0.146235	0.0836822	0.114959
	89.25	4.81526	5.09781	4.95653	4.87836		0.195583				0.167746	0.0956267	0.131686
	89.5	4.82663	5.10668	4.96666	4.89464		0.196949				0.187457	0.0886933	0.138075
	89.75	4.86174	5.12844	4.99509	4.91354		0.194249				0.182457	0.0794933	0.130975
	90	4.88398	5.14791	5.01594	4.934		0.195649				0.191157	0.0852267	0.138192
	90.25	4.89738	5.16539	5.03139	4.95362		0.194338				0.121135	0.0835156	0.102325
	90.5	4.92153	5.19115	5.05634	4.97446		0.192838				0.129746	0.0748711	0.102309
	90.75	4.9516	5.20482	5.07821	4.9956		0.190305				0.110701	0.0764267	0.0935641
	91	4.9832	5.22072	5.10196	5.01639		0.179083				0.107301	0.0557933	0.0815474
	91.25	4.98365	5.24453	5.11409	5.03513		0.171294				0.0928681	0.0458156	0.0693419
	91.5	5.0045	5.26041	5.13245	5.05468		0.162516				0.121846	0.0428822	0.0823641
	91.75	5.03241	5.27236	5.15239	5.07532		0.156249				0.0705793	0.0383489	0.0544641
	92	5.04996	5.28642	5.16819	5.09455		0.157516				0.0589459	0.0370822	0.0480141
	92.25	5.08071	5.29883	5.18977	5.11386		0.148338				0.0563681	0.0227044	0.0395363
	92.5	5.0998	5.27566	5.18773	5.13124		0.142438				0.0967681	0.01956	0.0581641
	92.75	5.11916	5.23978	5.17947	5.14492		0.133038				0.110079	0.0345489	0.0723141
	93	5.11524	5.15194	5.13359	5.15107		0.123094				0.0822459	0.0349711	0.0586085
	93.25	5.1102	5.05136	5.08078	5.14872		0.11986				0.0819126	0.0520822	0.0669974
	93.5	5.09746	4.90921	5.00333	5.13641		0.113805				0.0770348	0.0558489	0.0664419
	93.75	5.09808	4.73117	4.91463	5.11221		0.104205				0.0828681	0.0428156	0.0628419
	94	5.09251	4.55169	4.8221	5.07551		0.0938381				0.104201	0.04286	0.0735307
	94.25	5.0833	4.36304	4.72317	5.02606		0.0771604				0.0970348	0.0483822	0.0727085
	94.5	5.10343	4.19148	4.64746	4.96581		0.0700493				0.0898793	0.0560711	0.0729752
	94.75	5.09926	4.03791	4.56858	4.89701		0.0617715				0.0785459	0.0582489	0.0683974
	95	5.11503	3.89753	4.50628	4.82221		0.0547604				0.0639015	0.0476933	0.0557974
	95.25	5.10957	3.82093	4.46525	4.74795		0.0506604				0.103024	0.0477378	0.0753807
	95.5	5.13292	3.76962	4.45127	4.67801		0.0464493				0.0887904	0.0497044	0.0692474
	95.75	5.15387	3.75238	4.45313	4.61687		0.0423826				0.0874793	0.0616489	0.0745641
	96	5.15545	3.75418	4.45482	4.56578		0.0421604				0.0505459	0.0737267	0.0621363
	96.25	5.17789	3.76287	4.47038	4.5267		0.0370715				0.0548348	0.0756822	0.0652585
	96.5	5.17694	3.76506	4.471	4.49868		0.0382826				0.0935793	0.0636489	0.0786141
	96.75	5.20428	3.73566	4.46997	4.47896		0.0341159				0.0982459	0.0552156	0.0767307
	97	5.27915	3.71439	4.49677	4.47099		0.0327826				0.116079	0.0556489	0.0858641
	97.25	5.36722	3.68484	4.52603	4.47318		0.0329493				0.0965126	0.0647711	0.0806419
	97.5	5.46729	3.64888	4.55809	4.48349		0.0302048				0.0850348	0.0636156	0.0743252
	97.75	5.58186	3.58888	4.58537	4.4984		0.0278715				0.089257	0.0738711	0.0815641
	98	5.62735	3.51935	4.57335	4.51175		0.0238381				0.115601	0.0628044	0.089203
	98.25	5.63221	3.47444	4.55332	4.5227		0.0193937				0.122279	0.0801933	0.101236
	98.5	5.62619	3.43273	4.52946	4.52926		0.0216604				0.107824	0.08786	0.0978419
	98.75	5.62277	3.37877	4.50077	4.53257		0.0168937				0.0928126	0.103216	0.0980141
	99	5.62597	3.32636	4.47616	4.53326		0.0199826				0.10439	0.109349	0.10687
	99.25	5.61094	3.26527	4.43811	4.52674		0.0216159				0.0775793	0.115716	0.0966474
	99.5	5.6096	3.19951	4.40455	4.51324		0.0194493				0.0785126	0.115293	0.096903
	99.75	5.61772	3.14026	4.37899	4.49334		0.0171159				0.107401	0.124293	0.115847
	100	5.61353	3.08701	4.35027	4.46722		0.0160715				0.106246	0.109327	0.107786
	100.25	5.6129	3.02509	4.319	4.43896		0.0183715				0.0741126	0.119527	0.0968196
	100.5	5.59043	2.94971	4.27007	4.40749		0.0182937				0.0935459	0.114616	0.104081
	100.75	5.57589	2.87735	4.22662	4.37384		0.0185937				0.0959237	0.11276	0.104342
	101	5.54873	2.81294	4.18083	4.33829		0.019727				0.0962681	0.12046	0.108364
	101.25	5.46787	2.77002	4.11895	4.2986		0.0149048				0.0978681	0.122382	0.110125
	101.5	5.37613	2.71236	4.04425	4.25484		0.0153493				0.119668	0.118627	0.119147
	101.75	5.28167	2.65884	3.97025	4.20658		0.0162381				0.141413	0.112316	0.126864
	102	5.2007	2.58824	3.89447	4.15274		0.0204381				0.130201	0.112716	0.121459
	102.25	5.18337	2.52048	3.85193	4.09737		0.0199159				0.11719	0.109149	0.11317
	102.5	5.18199	2.48271	3.83235	4.0433		0.0161826				0.16559	0.09696	0.131275
	102.75	5.20967	2.44562	3.82764	3.99414		0.0190381				0.151024	0.0993378	0.125181
	103	5.21467	2.37769	3.79618	3.94632		0.0175937				0.17959	0.0928156	0.136203
	103.25	5.21955	2.33283	3.77619	3.90136		0.0160937				0.19429	0.0813489	0.13782
	103.5	5.21192	2.25621	3.73406	3.85859		0.0171048				0.190457	0.0765822	0.13352
	103.75	5.21259	2.21464	3.71362	3.82185		0.0161604				0.199113	0.0785822	0.138847
	104	5.18463	2.16256	3.67359	3.78889		0.0168826				0.20119	0.0700044	0.135597
	104.25	5.15832	2.13557	3.64695	3.76139		0.0129159				0.197957	0.0757822	0.13687
	104.5	5.13003	2.09495	3.61249	3.73479		0.0140604				0.219024	0.0941378	0.156581
	104.75	5.11985	2.06337	3.59161	3.70804		0.0170937				0.213679	0.0947933	0.154236
	105	5.09408	2.02162	3.55785	3.67806		0.0171604				0.225501	0.0790711	0.152286
	105.25	5.05248	2.01536	3.53392	3.64892		0.0152159				0.209579	0.0826044	0.146092
	105.5	5.01697	1.96793	3.49245	3.61739		0.0202159				0.19669	0.0773933	0.137042
	105.75	4.97409	1.94655	3.46032	3.58698		0.0208604				0.160335	0.0874267	0.123881
	106	4.92514	1.91683	3.42099	3.55446		0.0193159				0.143013	0.0816378	0.112325
	106.25	4.84531	1.88686	3.36609	3.5203		0.0184826				0.126379	0.107771	0.117075
	106.5	4.77089	1.84183	3.30636	3.48245		0.0184381				0.143735	0.106916	0.125325
	106.75	4.73161	1.82348	3.27755	3.44524		0.0207937				0.0977459	0.109938	0.103842
	107	4.68047	1.78212	3.2313	3.4052		0.0200937				0.0682015	0.109227	0.0887141
	107.25	4.65067	1.76567	3.20817	3.36635		0.0196381				0.0563904	0.109182	0.0827863
	107.5	4.61476	1.71906	3.16691	3.32557		0.0218159				0.037257	0.115238	0.0762474
	107.75	4.58602	1.68805	3.13704	3.28608		0.0184493				0.0200348	0.111171	0.065603
	108	4.53809	1.65106	3.09458	3.24544		0.0196604				0.0499126	0.120793	0.085353
	108.25	4.51345	1.62194	3.06769	3.20619		0.0187937				0.056357	0.133171	0.0947641
	108.5	4.47623	1.60424	3.04023	3.16998		0.0176159				0.0644904	0.125116	0.094803
	108.75	4.45699	1.58209	3.01954	3.13811		0.0205826				0.0328126	0.118693	0.075753
	109	4.43312	1.56146	2.99729	3.10697		0.0180493				0.107979	0.111693	0.109836
	109.25	4.44069	1.52618	2.98343	3.07943		0.0169159				0.151913	0.112127	0.13202
	109.5	4.45892	1.48381	2.97136	3.05312		0.0149381				0.175579	0.121949	0.148764
	109.75	4.46954	1.46087	2.96521	3.03071		0.0153381				0.196157	0.138371	0.167264
	110	4.47275	1.46263	2.96769	3.01189		0.0130048				0.212546	0.151849	0.182197
	110.25	4.46086	1.44947	2.95517	2.9964		0.013227				0.227313	0.141327	0.18432
	110.5	4.45866	1.41873	2.9387	2.98207		0.0164048				0.216268	0.131304	0.173786
	110.75	4.45906	1.39559	2.92733	2.96952		0.0164493				0.220535	0.119627	0.170081
	111	4.45418	1.37082	2.9125	2.95763		0.0110048				0.23809	0.115949	0.17702
	111.25	4.42336	1.34507	2.88422	2.94507		0.00573815				0.206557	0.124771	0.165664
	111.5	4.38795	1.33448	2.86122	2.93149		0.00396037				0.164257	0.137716	0.150986
	111.75	4.36539	1.31646	2.84093	2.91699		0.00620481				0.147501	0.135171	0.141336
	112	4.34891	1.30886	2.82889	2.90185		0.00268259				0.105135	0.104471	0.104803
	112.25	4.34823	1.26758	2.80791	2.88409		0.00533815				0.109057	0.105704	0.107381
	112.5	4.31563	1.23157	2.7736	2.86392		0.00236037				0.0878793	0.0929267	0.090403
	112.75	4.29891	1.21673	2.75782	2.84382		-0.00258407				0.108524	0.09086	0.0996919
	113	4.27754	1.19796	2.73775	2.82276		-0.00536185				0.111813	0.101127	0.10647
	113.25	4.24901	1.16359	2.7063	2.79985		-0.00675074				0.0852015	0.106382	0.0957919
	113.5	4.2031	1.12384	2.66347	2.77532		-0.00727296				0.115235	0.112849	0.114042
	113.75	4.14996	1.09642	2.62319	2.74887		-0.00275074				0.110624	0.107071	0.108847
	114	4.09022	1.06845	2.57934	2.71981		-0.00882852				0.0698793	0.102771	0.0863252
	114.25	4.06936	1.03297	2.55117	2.68895		-0.0106507				0.138313	0.118016	0.128164
	114.5	4.03572	0.988351	2.51204	2.65607		-0.0131952				0.129468	0.116671	0.12307
	114.75	4.00139	1.00205	2.50172	2.62587		-0.0144174				0.132857	0.129838	0.131347
	115	3.96783	0.980773	2.4743	2.59436		-0.0170285				0.138479	0.134104	0.136292
	115.25	3.91707	0.954873	2.43597	2.56083		-0.0165063				0.12879	0.144449	0.13662
	115.5	3.89716	0.950651	2.4239	2.52945		-0.0179285				0.164301	0.135382	0.149842
	115.75	3.8636	0.947273	2.40543	2.50078		-0.0122285				0.101568	0.125404	0.113486
	116	3.83371	0.938251	2.38598	2.47443		-0.017873				0.118079	0.125738	0.121909
	116.25	3.7942	0.929095	2.36165	2.45024		-0.0128063				0.160957	0.12836	0.144659
	116.5	3.74689	0.906295	2.32659	2.42529		-0.0111507				0.153879	0.120238	0.137059
	116.75	3.72009	0.919317	2.3197	2.40392		-0.0120619				0.166701	0.119549	0.143125
	117	3.69712	0.875017	2.28607	2.37996		-0.0101063				0.181657	0.11596	0.148809
	117.25	3.67033	0.862217	2.26627	2.35684		-0.00568407				0.17809	0.118071	0.148081
	117.5	3.65087	0.860651	2.25576	2.33682		-0.00733963				0.179024	0.112204	0.145614
	117.75	3.63632	0.850551	2.24344	2.31677		-0.00383963				0.197801	0.113093	0.155447
	118	3.62121	0.822239	2.22173	2.29635		-0.00722852				0.251968	0.104838	0.178403
	118.25	3.6147	0.794773	2.20474	2.27622		-0.00529519				0.281346	0.0854489	0.183397
	118.5	3.5778	0.781862	2.17983	2.25601		-0.00609519				0.265235	0.0887156	0.176975
	118.75	3.5501	0.776006	2.16305	2.23784		-0.00657296				0.212635	0.0931933	0.152914
	119	3.52992	0.761084	2.1455	2.21849		-0.00515074				0.15989	0.0819489	0.12092
	119.25	3.49864	0.758517	2.12858	2.20099		-0.00636185				0.165068	0.0830822	0.124075
	119.5	3.47194	0.754195	2.11307	2.18397		-0.00589519				0.158901	0.08726	0.123081
	119.75	3.44799	0.719939	2.08396	2.16488		-0.00648407				0.167035	0.0912711	0.129153
	120	3.43561	0.705106	2.07036	2.14565		-0.0111841				0.130801	0.0967156	0.113759
	120.25	3.41204	0.687695	2.04987	2.12655		-0.0118619				0.14409	0.105182	0.124636
	120.5	3.40016	0.678384	2.03927	2.10817		-0.00927296				0.120079	0.126038	0.123059
	120.75	3.39495	0.659351	2.02715	2.0912		-0.00789519				0.121379	0.115449	0.118414
	121	3.3926	0.647762	2.02018	2.07533		-0.00318407				0.114546	0.115927	0.115236
	121.25	3.3807	0.614595	1.99765	2.0589		-0.00436185				0.123213	0.127716	0.125464
	121.5	3.36296	0.611028	1.98699	2.04317		-0.00216185				0.104157	0.124127	0.114142
	121.75	3.35743	0.583784	1.97061	2.02734		-0.00358407				0.14559	0.135371	0.140481
	122	3.33343	0.578639	1.95603	2.01312		-0.00248407				0.135135	0.118482	0.126809
	122.25	3.30986	0.563773	1.93681	1.99828		0.00212704				0.169868	0.111404	0.140636
	122.5	3.30402	0.564351	1.93419	1.98543		0.00610481				0.158479	0.105671	0.132075
	122.75	3.29236	0.543395	1.91788	1.97194		0.0029937				0.187313	0.0979156	0.142614
	123	3.28916	0.534951	1.91206	1.95915		0.00472704				0.219546	0.112071	0.165809
	123.25	3.26794	0.532084	1.90001	1.9458		0.0020937				0.227268	0.11326	0.170264
	123.5	3.2567	0.544984	1.90084	1.93505		0.00387148				0.273624	0.117516	0.19557
	123.75	3.25544	0.532895	1.89417	1.92473		0.00670481				0.271424	0.131293	0.201359
	124	3.25031	0.520795	1.88555	1.91528		0.00666037				0.241779	0.110393	0.176086
	124.25	3.22104	0.517128	1.86909	1.90562		0.00632704				0.25379	0.13256	0.193175
	124.5	3.2034	0.509028	1.85621	1.89667		0.00238259				0.220913	0.144827	0.18287
	124.75	3.17997	0.513173	1.84657	1.88693		-0.000317407				0.227046	0.141204	0.184125
	125	3.15867	0.507473	1.83307	1.87751		-0.00013963				0.20059	0.14616	0.173375
	125.25	3.12622	0.511373	1.8188	1.86715		-0.00211741				0.193579	0.143016	0.168297
	125.5	3.09169	0.489339	1.79052	1.85498		-0.00186185				0.21759	0.159282	0.188436
	125.75	3.06692	0.484706	1.77581	1.84109		-0.00421741				0.212446	0.15776	0.185103
	126	3.03651	0.479628	1.75807	1.82597		-0.00725074				0.221457	0.152104	0.186781
	126.25	3.01249	0.493373	1.75293	1.81123		-0.00851741				0.230268	0.151304	0.190786
	126.5	3.0004	0.477728	1.73907	1.79678		-0.00598407				0.253235	0.123382	0.188309
	126.75	2.96667	0.482717	1.72469	1.78217		0.00147148				0.246735	0.130738	0.188736
	127	2.94494	0.443717	1.69433	1.76525		0.00152704				0.199957	0.142927	0.171442
	127.25	2.94123	0.446617	1.69392	1.74979		0.00260481				0.169568	0.136604	0.153086
	127.5	2.92648	0.412562	1.66952	1.73321		0.0033937				0.139313	0.133804	0.136559
	127.75	2.91173	0.426384	1.66906	1.71971		0.000715926				0.14519	0.135271	0.140231
	128	2.89698	0.420573	1.65878	1.70671		0.0021937				0.156279	0.129904	0.143092
	128.25	2.88223	0.400406	1.64132	1.69374		0.00127148				0.16389	0.134749	0.14932
	128.5	2.86748	0.391084	1.62928	1.68		0.00291593				0.160768	0.146493	0.153631
	128.75	2.85273	0.390417	1.62157	1.66694		0.00502704				0.142801	0.16966	0.156231
	129	2.83798	0.374839	1.60641	1.6538		0.0027937				0.146224	0.158971	0.152597
	129.25	2.82323	0.375517	1.59937	1.64325		0.00103815				0.158046	0.152582	0.155314
	129.5	2.80848	0.349917	1.5792	1.6305		-0.0021063				0.218879	0.179204	0.199042
	129.75	2.79373	0.354651	1.57419	1.61991		-0.00425074				0.238979	0.185827	0.212403
	130	2.77898	0.333528	1.55626	1.60738		-0.00199519				0.227035	0.181749	0.204392
	130.25	2.76423	0.326928	1.54558	1.5948		-0.00275074				0.222079	0.187893	0.204986
	130.5	2.74948	0.340106	1.54479	1.58407		0.000649259				0.219924	0.190038	0.204981
	130.75	2.73473	0.330217	1.53247	1.57332		0.0012937				0.210913	0.190871	0.200892
	131	2.71998	0.332262	1.52612	1.56271		-0.0014063				0.198946	0.197438	0.198192
	131.25	2.70523	0.333162	1.5192	1.55302		-0.00157296				0.184879	0.203682	0.194281
	131.5	2.69048	0.344195	1.51734	1.54391		-0.00199519				0.191657	0.203682	0.19767
	131.75	2.67573	0.375817	1.52577	1.53797		0.0038937				0.137001	0.190071	0.163536
	132	2.66098	0.375984	1.51848	1.53178		0.000649259				0.12759	0.179416	0.153503
	132.25	2.64623	0.371028	1.50863	1.52649		0.00536037				0.159779	0.16556	0.16267
	132.5	2.63148	0.359817	1.49565	1.52094		0.0075937				0.148679	0.169182	0.158931
	132.75	2.61673	0.351362	1.48405	1.51419		0.00483815				0.13999	0.15896	0.149475
	133	2.60198	0.349328	1.47566	1.50788		0.00374926				0.127213	0.160427	0.14382
	133.25	2.58723	0.347406	1.46732	1.50134		0.00132704				0.156468	0.148016	0.152242
	133.5	2.57248	0.348384	1.46043	1.49481		0.000193704				0.187124	0.144338	0.165731
	133.75	2.55773	0.337795	1.44776	1.48708		0.0063937				0.213146	0.151116	0.182131
	134	2.54298	0.323995	1.43349	1.47683		0.00623815					0.158127	0.158127
	134.25	2.52823	0.329173	1.4287	1.46685		0.00994926					0.165616	0.165616
	134.5	2.51348	0.311239	1.41236	1.45616		0.00681593					0.165804	0.165804
	134.75	2.49873	0.308995	1.40386	1.44596		0.00502704					0.155216	0.155216
	135	2.48398	0.308317	1.39615	1.43619		0.00581593					0.158727	0.158727
	135.25	2.46923	0.308562	1.3889	1.42655		0.00993815					0.141438	0.141438
	135.5	2.45448	0.290251	1.37237	1.416		0.0100159					0.140838	0.140838
	135.75	2.43973	0.285539	1.36264	1.40514		0.0117048					0.149338	0.149338
	136	2.42498	0.299806	1.36239	1.39565		0.00784926					0.146793	0.146793
	136.25	2.41023	0.291051	1.35064	1.38645		0.00832704					0.143504	0.143504
	136.5	2.39548	0.282973	1.33923	1.3765		0.0100048					0.137682	0.137682
	136.75	2.38073	0.285239	1.33299	1.36768		0.0100937					0.156127	0.156127
	137	2.36598	0.281351	1.32367	1.35877		0.012227					0.168593	0.168593
	137.25	2.35123	0.275906	1.31357	1.3496		0.0139604					0.160238	0.160238
	137.5	2.33648	0.269295	1.30289	1.34004		0.0115826					0.168193	0.168193
	137.75	2.32173	0.263539	1.29264	1.33118		0.0181826					0.163782	0.163782
	138	2.30698	0.253262	1.28012	1.32201		0.0146381					0.142816	0.142816
	138.25	2.29223	0.229973	1.2611	1.31076		0.0170715					0.139949	0.139949
	138.5	2.27748	0.223773	1.25063	1.29965		0.0189159					0.135327	0.135327
	138.75	2.26273	0.213451	1.23809	1.28841		0.0159604					0.136282	0.136282
	139	2.24798	0.226928	1.23746	1.2778		0.0198604					0.130949	0.130949
	139.25	2.23323	0.224684	1.22896	1.26727		0.0184604					0.11326	0.11326
	139.5	2.21848	0.220251	1.21937	1.25681		0.0182493					0.121916	0.121916
	139.75	2.20373	0.204517	1.20412	1.24583		0.0203826					0.13606	0.13606
	140	2.18898	0.208173	1.19858	1.23538		0.0203826					0.138404	0.138404
	140.25	2.17423	0.211484	1.19286	1.22568		0.0252826					0.154616	0.154616
	140.5	2.15948	0.232984	1.19623	1.21848		0.0256937					0.151804	0.151804
	140.75	2.14473	0.228695	1.18671	1.21138		0.0212937					0.142427	0.142427
	141	2.12998	0.217562	1.17377	1.20423		0.0241493					0.145116	0.145116
	141.25	2.12757	0.202217	1.16489	1.19617		0.0206937					0.151371	0.151371
	141.5	2.12796	0.197684	1.16282	1.18882		0.0201381					0.150038	0.150038
	141.75	2.12061	0.185528	1.15307	1.18145		0.0212826					0.14026	0.14026
	142	2.11511	0.197284	1.1562	1.17613		0.0182159					0.119827	0.119827
	142.25	2.11316	0.205328	1.15925	1.17176		0.0141381					0.109482	0.109482
	142.5	2.11713	0.191239	1.15418	1.16746		0.014927					0.101904	0.101904
	142.75	2.09559	0.163562	1.12958	1.16005		0.0152048					0.0934267	0.0934267
	143	2.08601	0.162773	1.12439	1.15313		0.0161493					0.0892378	0.0892378
	143.25	2.09599	0.180351	1.13817	1.14917		0.013127					0.07506	0.07506
	143.5	2.13219	0.192006	1.1621	1.14886		0.0105715					0.0499156	0.0499156
	143.75	2.13407	0.187995	1.16103	1.14866		0.0142493					0.06106	0.06106
	144	2.12103	0.197462	1.15924	1.14935		0.0140604					0.0646378	0.0646378
	144.25	2.1489	0.181239	1.16507	1.15033		0.0171381					0.08216	0.08216
	144.5	2.12553	0.169495	1.14751	1.14903		0.0182937					0.0765378	0.0765378
	144.75	2.12831	0.182662	1.15549	1.14917		0.0163381					0.07146	0.07146
	145	2.10268	0.194806	1.14874	1.1513		0.0141604					0.0756711	0.0756711
	145.25	2.06856	0.184817	1.12669	1.15156		0.0140048					0.0755822	0.0755822
	145.5	2.03289	0.180228	1.10656	1.14805		0.0154381					0.0874267	0.0874267
	145.75	1.97957	0.170851	1.07521	1.13839		0.0162048					0.100849	0.100849
	146	1.94921	0.165684	1.05745	1.12688		0.0176715					0.0959822	0.0959822
	146.25	1.91331	0.160617	1.03697	1.1133		0.0188159					0.0914933	0.0914933
	146.5	1.88578	0.163651	1.02472	1.0977		0.0158604					0.0637156	0.0637156
	146.75	1.85	0.170339	1.01017	1.08244		0.0156493					0.0753156	0.0753156
	147	1.84181	0.169051	1.00543	1.06577		0.0153159					0.0760822	0.0760822
	147.25	1.81417	0.160128	0.987148	1.04782		0.0164381					0.0709822	0.0709822
	147.5	1.78279	0.181362	0.982074	1.03175		0.0157826					0.0841267	0.0841267
	147.75	1.73353	0.183939	0.958733	1.01532		0.0173937					0.0773267	0.0773267
	148	1.71264	0.182017	0.947331	1.00111		0.0204381					0.0581378	0.0581378
	148.25	1.69676	0.184251	0.940506	0.98812		0.0133937					0.0545378	0.0545378
	148.5	1.67461	0.192117	0.933363	0.976608		0.0124048					0.0518489	0.0518489
	148.75	1.66053	0.197539	0.929036	0.965977		0.0151937					0.0637933	0.0637933
	149	1.65673	0.192428	0.924577	0.956467		0.0195826					0.0566489	0.0566489
	149.25	1.66253	0.174695	0.918611	0.94682		0.0202937					0.0468933	0.0468933
	149.5	1.68067	0.183973	0.93232	0.940728		0.0225159					0.0461044	0.0461044
	149.75	1.67833	0.166073	0.922203	0.934076		0.0242937					0.0415156	0.0415156
	150	1.68602	0.152139	0.91908	0.92967		0.023327					0.0438156	0.0438156
	150.25	1.69015	0.148951	0.91955	0.926583		0.0216604					0.04856	0.04856
	150.5	1.68594	0.154617	0.920278	0.924335		0.0248604					0.0335378	0.0335378
	150.75	1.6689	0.157873	0.913385	0.922116		0.0265381					0.0378489	0.0378489
	151	1.66884	0.167306	0.918072	0.920897		0.026827					0.0369822	0.0369822
	151.25	1.66726	0.170395	0.918828	0.920259		0.0240604					0.0311711	0.0311711
	151.5	1.67005	0.173373	0.921711	0.920603		0.0241604					0.01756	0.01756
	151.75	1.66793	0.167928	0.917927	0.919004		0.0229048					0.0143933	0.0143933
	152	1.64883	0.181017	0.914922	0.918195		0.0245048					0.00974889	0.00974889
	152.25	1.6488	0.181473	0.915135	0.917757		0.026027					0.00182667	0.00182667
	152.5	1.64572	0.177095	0.911408	0.916852		0.0280604					0.00423778	0.00423778
	152.75	1.62834	0.180584	0.904464	0.915095		0.030027					0.0179933	0.0179933
	153	1.60976	0.165173	0.887467	0.912215		0.0237048					0.00919333	0.00919333
	153.25	1.58511	0.158584	0.871846	0.907079		0.022727					0.0103489	0.0103489
	153.5	1.54805	0.154706	0.851378	0.899584		0.0221493					0.0125489	0.0125489
	153.75	1.51551	0.159017	0.837263	0.890201		0.023627					0.0323267	0.0323267
	154	1.50446	0.160384	0.83242	0.8807		0.0207493					0.0447156	0.0447156
	154.25	1.49741	0.135439	0.816427	0.869757		0.0219048					0.0430156	0.0430156
	154.5	1.48189	0.145917	0.813901	0.858508		0.0242715					0.0509489	0.0509489
	154.75	1.47563	0.151151	0.813392	0.847618		0.0254381					0.0463044	0.0463044
	155	1.46677	0.123684	0.795226	0.83548		0.0235715					0.0426822	0.0426822
	155.25	1.44224	0.113262	0.77775	0.823289		0.0238381					0.0382378	0.0382378
	155.5	1.43737	0.116173	0.776773	0.812726		0.025927					0.03366	0.03366
	155.75	1.42954	0.110362	0.769953	0.803678		0.0261048					0.0365044	0.0365044
	156	1.4104	0.115117	0.762757	0.7954		0.0256048					0.0321156	0.0321156
	156.25	1.406	0.109084	0.757541	0.78708		0.0283048					0.0256933	0.0256933
	156.5	1.37706	0.125006	0.751034	0.779814		0.0287937					0.0306933	0.0306933
	156.75	1.373	0.125039	0.749018	0.772605		0.0276048					0.0284489	0.0284489
	157	1.35154	0.119739	0.735642	0.763966		0.0229381					0.0286822	0.0286822
	157.25	1.35087	0.128906	0.73989	0.757818		0.0244937					0.02846	0.02846
	157.5	1.33051	0.139851	0.73518	0.753088		0.0294048					0.0392822	0.0392822
	157.75	1.33181	0.132773	0.732291	0.748145		0.028927					0.0419933	0.0419933
	158	1.3314	0.134273	0.732835	0.744021		0.0315493					0.0446156	0.0446156
	158.25	1.31395	0.136539	0.725245	0.739853		0.0319826					0.0443044	0.0443044
	158.5	1.28309	0.145428	0.71426	0.735044		0.0370493					0.0315156	0.0315156
	158.75	1.27016	0.140984	0.705573	0.729993		0.0339604					0.0200822	0.0200822
	159	1.23903	0.120773	0.679903	0.722313		0.0324048					0.00383778	0.00383778
	159.25	1.22337	0.132862	0.678115	0.715921		0.0368381					-0.00874	-0.00874
	159.5	1.19711	0.130006	0.66356	0.70744		0.038327					-0.0138844	-0.0138844
	159.75	1.16314	0.120328	0.641736	0.697057		0.038527					-0.0183622	-0.0183622
	160	1.13468	0.121773	0.628226	0.685495		0.0395604					-0.0218289	-0.0218289
	160.25	1.11246	0.122728	0.617595	0.67269		0.0379604					-0.00899556	-0.00899556
	160.5	1.08388	0.107584	0.595732	0.6583		0.036927					-0.01904	-0.01904
	160.75	1.07886	0.100395	0.589625	0.644452		0.0372048					-0.0103733	-0.0103733
	161	1.03626	0.110328	0.573292	0.629754		0.0398826					-0.00592889	-0.00592889
	161.25	1.02666	0.114051	0.570356	0.617582		0.0396048					-0.00101778	-0.00101778
	161.5	0.995232	0.099395	0.547314	0.603049		0.0412604					0.00558222	0.00558222
	161.75	0.981356	0.104362	0.542859	0.589637		0.0422937					0.0128378	0.0128378
	162	0.949932	0.109984	0.529958	0.577218		0.0445048					0.0144267	0.0144267
	162.25	0.908944	0.114873	0.511908	0.564293		0.0434048					0.0178711	0.0178711
	162.5	0.887662	0.114028	0.500845	0.551321		0.0463159					0.00648222	0.00648222
	162.75	0.890503	0.106873	0.498688	0.540538		0.0464715					0.00814889	0.00814889
	163	0.865427	0.118795	0.492111	0.529703		0.041527					0.00369333	0.00369333
	163.25	0.864238	0.110273	0.487256	0.520144		0.0409381					0.00244889	0.00244889
	163.5	0.855003	0.125473	0.490238	0.511242		0.042727					0.00381556	0.00381556
	163.75	0.855915	0.127928	0.491922	0.505087		0.0385604					0.0138044	0.0138044
	164	0.850509	0.133828	0.492169	0.499455		0.0361715					-0.00420667	-0.00420667
	164.25	0.854915	0.133539	0.494227	0.495485		0.0337048					-0.0112067	-0.0112067
	164.5	0.836309	0.129639	0.482974	0.49227		0.0364937					-0.0171622	-0.0171622
	164.75	0.836415	0.115328	0.475872	0.489495		0.0349493					-0.02264	-0.02264
	165	0.819738	0.118228	0.468983	0.486195		0.0415826					-0.00936222	-0.00936222
	165.25	0.81165	0.103306	0.457478	0.482346		0.0419159					-0.0143178	-0.0143178
	165.5	0.794185	0.103606	0.448896	0.478084		0.0421048					-0.00766222	-0.00766222
	165.75	0.789256	0.100117	0.444687	0.473023		0.0410048					-0.00411778	-0.00411778
	166	0.776268	0.104362	0.440315	0.467289		0.0417937					-0.00694	-0.00694
	166.25	0.789227	0.0967172	0.442972	0.461823		0.039927					0.00143778	0.00143778
	166.5	0.795856	0.0915506	0.443703	0.456209		0.0394159					0.00640444	0.00640444
	166.75	0.783074	0.0834172	0.433245	0.450683		0.0387826					0.00740444	0.00740444
	167	0.769838	0.0956506	0.432744	0.445892		0.0377826					-0.00746222	-0.00746222
	167.25	0.772444	0.111062	0.441753	0.442866		0.0312493					-0.00554	-0.00554
	167.5	0.776391	0.0956839	0.436038	0.440484		0.0365937					-0.00262889	-0.00262889
	167.75	0.785144	0.0952617	0.440203	0.439518		0.0344159					-0.00984	-0.00984
	168	0.786803	0.0938506	0.440327	0.439033		0.0372826					-0.00660667	-0.00660667
	168.25	0.788303	0.0863839	0.437343	0.438703		0.0400381					-0.00885111	-0.00885111
	168.5	0.769574	0.0930283	0.431301	0.437406		0.0441715					-0.00152889	-0.00152889
	168.75	0.774103	0.0844728	0.429288	0.435805		0.0436937					0.00490444	0.00490444
	169	0.779297	0.0961283	0.437713	0.436301		0.0441381					-0.000473333	-0.000473333
	169.25	0.771209	0.0978728	0.434541	0.436501		0.0412715					0.00689333	0.00689333
	169.5	0.787891	0.077895	0.432893	0.435516		0.0428381					-0.00497333	-0.00497333
	169.75	0.794509	0.0815172	0.438013	0.435736		0.0406937					-0.0188067	-0.0188067
	170	0.792262	0.0893172	0.44079	0.435801		0.0414604					-0.0282067	-0.0282067
	170.25	0.791156	0.0838061	0.437481	0.435485		0.0400159					-0.0185844	-0.0185844
	170.5	0.779644	0.0819617	0.430803	0.434758		0.0400715					-0.0217289	-0.0217289
	170.75	0.772609	0.0700839	0.421346	0.433652		0.040127					-0.0214511	-0.0214511
	171	0.783562	0.0780061	0.430784	0.433818		0.0423048					-0.0225622	-0.0225622
	171.25	0.776656	0.0649506	0.420803	0.431939		0.0415048					-0.0214956	-0.0214956
	171.5	0.773644	0.0772617	0.425453	0.43093		0.0486604					-0.00332889	-0.00332889
	171.75	0.777644	0.0843839	0.431014	0.430721		0.0508159					-0.00510667	-0.00510667
	172	0.763268	0.0914394	0.427354	0.429536		0.0481159					0.00816	0.00816
	172.25	0.758962	0.074595	0.416778	0.426869		0.0534715					0.0167267	0.0167267
	172.5	0.764562	0.0859394	0.425251	0.42551		0.0548381					0.00159333	0.00159333
	172.75	0.76215	0.0806506	0.4214	0.424465		0.0544493					-0.00261778	-0.00261778
	173	0.759403	0.0698728	0.414638	0.423719		0.0554826					-0.00732889	-0.00732889
	173.25	0.765421	0.0705283	0.417975	0.422296		0.0586493					-0.0252178	-0.0252178
	173.5	0.780203	0.0603839	0.420293	0.42224		0.0596604					-0.0210733	-0.0210733
	173.75	0.777368	0.0353283	0.406348	0.420117		0.0572159					-0.0385733	-0.0385733
	174	0.775556	0.0283061	0.401931	0.416885		0.0575604					-0.0410956	-0.0410956
	174.25	0.77565	0.0321061	0.403878	0.414277		0.0581715					-0.0322067	-0.0322067
	174.5	0.773803	0.0446061	0.409205	0.413435		0.0529715					-0.0332067	-0.0332067
	174.75	0.766097	0.0249061	0.395502	0.41013		0.0518937					-0.0369956	-0.0369956
	175	0.768309	0.0412506	0.40478	0.408283		0.0528604					-0.0194733	-0.0194733
	175.25	0.777268	0.0575172	0.417392	0.408589		0.0494381					-0.0245622	-0.0245622
	175.5	0.777632	0.0575728	0.417603	0.408548		0.0453826					-0.0151844	-0.0151844
	175.75	0.792515	0.0585394	0.425527	0.409129		0.0447604					-0.02214	-0.02214
	176	0.765485	0.0697839	0.417635	0.410384		0.0446937					-0.00740667	-0.00740667
	176.25	0.768585	0.0785506	0.423568	0.412788		0.0427937					0.00124889	0.00124889
	176.5	0.763044	0.0787617	0.420903	0.414679		0.0439159					-0.00671778	-0.00671778
	176.75	0.753356	0.061795	0.407575	0.414498		0.0486604					-0.00576222	-0.00576222
	177	0.761315	0.0625061	0.41191	0.416321		0.0508159					0.00398222	0.00398222
	177.25	0.761027	0.0662394	0.413633	0.417305		0.0481159					0.00287111	0.00287111
	177.5	0.748691	0.0766506	0.412671	0.416781		0.0534715					0.00123778	0.00123778
	177.75	0.726174	0.0700728	0.398123	0.414616		0.0548381					0.00992667	0.00992667
	178	0.711015	0.086495	0.398755	0.411642		0.0519715					0.0127489	0.0127489
	178.25	0.700215	0.0879506	0.394083	0.409025		0.0506826					0.00644889	0.00644889
	178.5	0.699291	0.0851394	0.392215	0.405541		0.051927					0.00841556	0.00841556
	178.75	0.706297	0.0694172	0.387857	0.401869		0.0509937					0.00709333	0.00709333
	179	0.704185	0.0835839	0.393885	0.400348		0.0527493					-0.00272889	-0.00272889
	179.25	0.701985	0.0893728	0.395679	0.398545		0.0492159					-0.0154844	-0.0154844
	179.5	0.702021	0.076095	0.389058	0.395814		0.0498159					-0.0320511	-0.0320511
	179.75	0.702732	0.0805506	0.391642	0.393477		0.0444381					-0.0220956	-0.0220956
	180	0.68175	0.0843394	0.383045	0.391802		0.0417937					-0.0284844	-0.0284844
	180.25	0.692597	0.0905617	0.391579	0.391005		0.039927					-0.01514	-0.01514
	180.5	0.704032	0.0823839	0.393208	0.390908		0.0394159					-0.02604	-0.02604
	180.75	0.703474	0.0875061	0.39549	0.391271		0.0387826					-0.0305067	-0.0305067
	181	0.691991	0.101817	0.396904	0.392277		0.0377826					-0.0341733	-0.0341733
	181.25	0.68848	0.100039	0.394259	0.392318		0.0312493					-0.0159511	-0.0159511
	181.5	0.691532	0.0975506	0.394542	0.392192		0.0365937					-0.0171178	-0.0171178
	181.75	0.705062	0.088595	0.396828	0.393055		0.0344159					-0.0114511	-0.0114511
	182	0.715756	0.0559283	0.385842	0.392411		0.0372826					-0.0230178	-0.0230178
	182.25	0.715297	0.061295	0.388296	0.392994		0.0400381					-0.0231733	-0.0231733
	182.5	0.722762	0.044695	0.383728	0.392122		0.0441715					-0.0415178	-0.0415178
	182.75	0.721874	0.0472394	0.384557	0.391161		0.0436937					-0.0336178	-0.0336178
	183	0.726397	0.046695	0.386546	0.390167		0.0441381					-0.0356511	-0.0356511
	183.25	0.745932	0.0490617	0.397497	0.390233		0.0412715					-0.0257067	-0.0257067
	183.5	0.751456	0.0422283	0.396842	0.39052		0.0428381					-0.0405178	-0.0405178
	183.75	0.75458	0.0472172	0.400898	0.391226		0.0406937					-0.0231511	-0.0231511
	184	0.757774	0.0599394	0.408857	0.392563		0.0414604					-0.0284622	-0.0284622
	184.25	0.759391	0.0815617	0.420476	0.396411		0.0400159					-0.0138289	-0.0138289
	184.5	0.75218	0.0775617	0.414871	0.399364		0.0400715					-27.0302	-27.0302
	184.75	0.750444	0.0722061	0.411325	0.40243		0.040127					-27.0302	-27.0302
	185	0.741803	0.0750394	0.408421	0.405082		0.974711					-27.0302	-27.0302
	185.25	0.749309	0.0614839	0.405396	0.407176		0.982217					-27.0302	-27.0302
	185.5	0.73225	0.0468172	0.389534	0.406291		0.965158					-27.0302	-27.0302
	185.75	0.71218	0.0307172	0.371448	0.40347		0.945087					-27.0302	-27.0302
	186	0.69695	0.034695	0.365823	0.399572		0.929858					-27.0302	-27.0302
	186.25	0.694244	0.0370172	0.365631	0.394769		0.927152					-27.0302	-27.0302
	186.5	0.695197			0.391556		0.928105					-27.0302	-27.0302
	186.75	0.679732			0.388225		0.91264					-27.0302	-27.0302
	187	0.684974			0.384375		0.917881					-27.0302	-27.0302
	187.25	0.666732			0.379566		0.89964					-27.0302	-27.0302
	187.5	0.652815			0.373109		0.885722					-27.0302	-27.0302
	187.75	0.645285			0.367634		0.878193					-27.0302	-27.0302
	188	0.635621			0.365727		0.868528					-27.0302	-27.0302
	188.25	0.636897			0.365631		0.869805					-27.0302	-27.0302
	188.5	0.63375			#DIV/0!		0.866658					-27.0302	-27.0302
	188.75	0.634521			#DIV/0!		0.867428					-27.0302	-27.0302
	189	0.628138			#DIV/0!		0.861046					-27.0302	-27.0302
	189.25	0.625185			#DIV/0!		0.858093					-27.0302	-27.0302
	189.5	0.61415			#DIV/0!		0.847058					-27.0302	-27.0302
	189.75	0.621991			#DIV/0!		0.854899					-27.0302	-27.0302
	190	0.635991			#DIV/0!		0.868899					-27.0302	-27.0302
	190.25	0.640832			#DIV/0!		0.87374					-27.0302	-27.0302
	190.5	0.628432			#DIV/0!		0.86134					-27.0302	-27.0302
	190.75	0.617097			#DIV/0!		0.850005					-27.0302	-27.0302
	191	0.629962			#DIV/0!							-27.0302	-27.0302
	191.25	0.621156			#DIV/0!							-27.0302	-27.0302
	191.5	0.633197			#DIV/0!							-27.0302	-27.0302
	191.75	0.625785			#DIV/0!							-27.0302	-27.0302
	192	0.62435			#DIV/0!							-27.0302	-27.0302
	192.25	0.61815			#DIV/0!							-27.0302	-27.0302
	192.5	0.606944			#DIV/0!							-27.0302	-27.0302
	192.75	0.60115			#DIV/0!							-27.0302	-27.0302
	193	0.601438			#DIV/0!							-27.0302	-27.0302
	193.25	0.58968			#DIV/0!							-27.0302	-27.0302
	193.5	0.598121			#DIV/0!							-27.0302	-27.0302
	193.75	0.605397			#DIV/0!							-27.0302	-27.0302
	194	0.617115			#DIV/0!							-27.0302	-27.0302
	194.25	0.608085			#DIV/0!							-27.0302	-27.0302
	194.5	0.606332			#DIV/0!							-27.0302	-27.0302
	194.75	0.611127			#DIV/0!							-27.0302	-27.0302
	195	0.609203			#DIV/0!							-27.0302	-27.0302
	195.25	0.610762			#DIV/0!							-27.0302	-27.0302
	195.5	0.587821			#DIV/0!							-27.0302	-27.0302
	195.75	0.56385			#DIV/0!							-27.0302	-27.0302
	196	0.570003			#DIV/0!							-27.0302	-27.0302
	196.25	0.550268			#DIV/0!							-27.0302	-27.0302
	196.5	0.545574			#DIV/0!							-27.0302	-27.0302
	196.75	0.541274			#DIV/0!							-27.0302	-27.0302
	197	0.55318			#DIV/0!							-27.0302	-27.0302
	197.25	0.547921			#DIV/0!							-27.0302	-27.0302
	197.5	0.55358			#DIV/0!							-27.0302	-27.0302
	197.75	0.547597			#DIV/0!							-27.0302	-27.0302
	198	0.542085			#DIV/0!							-27.0302	-27.0302
	198.25	0.516985			#DIV/0!							-27.0302	-27.0302
	198.5	0.519103			#DIV/0!							-27.0302	-27.0302
	198.75	0.516891			#DIV/0!							-27.0302	-27.0302
	199	0.521009			#DIV/0!							-27.0302	-27.0302
	199.25	0.531921			#DIV/0!							-27.0302	-27.0302
	199.5	0.531444			#DIV/0!							-27.0302	-27.0302
	199.75	0.543244			#DIV/0!							-27.0302	-27.0302
	200	0.556709			#DIV/0!							-27.0302	-27.0302
	200.25	0.546891			#DIV/0!							-27.0302	-27.0302
	200.5	0.580785			#DIV/0!							-27.0302	-27.0302
	200.75	0.596003			#DIV/0!							-27.0302	-27.0302
	201	0.593232			#DIV/0!							-27.0302	-27.0302
	201.25	0.586532			#DIV/0!							-27.0302	-27.0302
	201.5	0.580703			#DIV/0!							-27.0302	-27.0302
	201.75	0.566303			#DIV/0!							-27.0302	-27.0302
	202	0.561862			#DIV/0!							-27.0302	-27.0302
	202.25	0.56638			#DIV/0!							-27.0302	-27.0302
	202.5	0.57105			#DIV/0!							-27.0302	-27.0302
	202.75	0.570544			#DIV/0!							-27.0302	-27.0302
	203	0.577491			#DIV/0!							-27.0302	-27.0302
	203.25	0.586356			#DIV/0!							-27.0302	-27.0302
	203.5	0.588927			#DIV/0!							-27.0302	-27.0302
	203.75	0.578727			#DIV/0!							-27.0302	-27.0302
	204	0.593697			#DIV/0!							-27.0302	-27.0302
	204.25	0.579797			#DIV/0!							-27.0302	-27.0302
	204.5	0.590974			#DIV/0!							-27.0302	-27.0302
	204.75	0.572927			#DIV/0!							-27.0302	-27.0302
	205	0.560021			#DIV/0!							-27.0302	-27.0302
	205.25	0.553238			#DIV/0!							-27.0302	-27.0302
	205.5	0.546944			#DIV/0!							-27.0302	-27.0302
	205.75	0.544038			#DIV/0!							-27.0302	-27.0302
	206	0.561127			#DIV/0!							-27.0302	-27.0302
	206.25	0.559162			#DIV/0!							-27.0302	-27.0302
	206.5	0.560285			#DIV/0!							-27.0302	-27.0302
	206.75	0.568238			#DIV/0!							-27.0302	-27.0302
	207	0.587403			#DIV/0!							-27.0302	-27.0302
	207.25	0.57768			#DIV/0!							-27.0302	-27.0302
	207.5	0.575432			#DIV/0!							-27.0302	-27.0302
	207.75	0.570197			#DIV/0!							-27.0302	-27.0302
	208	0.571774			#DIV/0!							-27.0302	-27.0302
	208.25	0.57915			#DIV/0!							-27.0302	-27.0302
	208.5	0.582009			#DIV/0!							-27.0302	-27.0302
	208.75	0.573215			#DIV/0!							-27.0302	-27.0302
	209	0.577244			#DIV/0!							-27.0302	-27.0302
	209.25	0.572609			#DIV/0!							-27.0302	-27.0302
	209.5	0.592791			#DIV/0!							-27.0302	-27.0302
	209.75	0.586256			#DIV/0!							-27.0302	-27.0302
	210	0.597632			#DIV/0!							-27.0302	-27.0302
	210.25	0.584603			#DIV/0!							-27.0302	-27.0302
	210.5	0.596603			#DIV/0!							-27.0302	-27.0302
	210.75	0.579585			#DIV/0!							-27.0302	-27.0302
	211	0.576209			#DIV/0!							-27.0302	-27.0302
	211.25	0.562562			#DIV/0!							-27.0302	-27.0302
	211.5				#DIV/0!							-27.4046
	211.75				#DIV/0!							-27.4046
	212				#DIV/0!							-27.4046
												-27.4046
												-27.4046
												-27.4046
												-27.4046
												-27.4046
												-27.4046
												-27.4046
												-27.4046
												-27.4046
												-27.4046
												-27.4046
												-27.4046
												-27.4046
												-27.4046
												-27.4046
												-27.4046
												-27.4046
												-27.4046
												-27.4046
												-27.4046
												-27.4046
												-27.4046
												-27.4046
												-27.4046
												-27.4046
												-27.4046
												-27.4046
												-27.4046
												-27.4046
												-27.4046
												-27.4046
												-27.4046
												-27.4046
												-27.4046
												-27.4046
												-27.4046
												-27.4046
												-27.4046
												-27.4046
												-27.4046
												-27.4046
												-27.4046
												-27.4046
												-27.4046
												-27.4046
												-27.4046
												-27.4046
												-27.4046
												-27.4046
												-27.4046
												-27.4046
												-27.4046
												-27.4046
												-27.4046
												-27.4046
												-27.4046
												-27.4046
												-27.4046
												-27.4046
												-27.4046
												-27.4046
												-27.4046
												-27.4046
												-27.4046
												-27.4046
												-27.4046
												-27.4046
												-27.4046
												-27.4046
												-27.4046
												-27.4046
												-27.4046
												-27.4046
												-27.4046
												-27.4046
												-27.4046
												-27.4046
												-27.4046
												-27.4046
												-27.4046
												-27.4046
												-27.4046
												-27.4046
												-27.4046
												-27.4046
												-27.4046
												-27.4046
												-27.4046
												-27.4046
												-27.4046
												-27.4046
												-27.4046
												-27.4046
												-27.4046
												-27.4046
												-27.4046
												-27.4046

## Sheet: Appendix Fig. 2B
			H2S in headspace from H2S permeation tube					H2S in headspce from NaHS in solution
		Time, minutes	2021-05-11	2021-06-18	Average	Smoothed
		-30	-0.00215885	0.0151933	0.00651724			0.00270556
		-29.75	-0.0039901	0.0224933	0.00925161			0.00199833
		-29.5	0.0197286	0.0228711	0.0212999			0.00483556
		-29.25	0.0240474	0.00684889	0.0154481			0.00268389
		-29	0.0276411	0.0171711	0.0224061			0.00653222
		-28.75	0.0165286	0.0133044	0.0149165			0.0108806
		-28.5	0.0136474	0.0241933	0.0189204			0.0113067
		-28.25	0.000734896	0.00861556	0.00467523			0.00837722
		-28	-0.00824635	-0.00795111	-0.00809873			0.00489222
		-27.75	-0.0025401	0.00414889	0.000804392			0.00461833
		-27.5	-0.000196354	0.0248822	0.0123429			-0.00164444
		-27.25	-0.00507135	0.0351044	0.0150165			-0.00225167
		-27	-0.00964635	0.04746	0.0189068			-0.00348111
		-26.75	-0.0268339	0.0401711	0.00666863			-0.00899944
		-26.5	-0.0265089	0.0239378	-0.00128554			-0.0121289
		-26.25	-0.0294339	0.00786	-0.0107869			-0.0125472
		-26	-0.0387714	0.0285489	-0.00511123			-0.00803222	0.000573268
		-25.75	-0.0409901	0.0154378	-0.0127762			-0.00173944	0.000311797
		-25.5	-0.0489464	0.0164156	-0.0162654			-0.00714667	-0.000226144
		-25.25	-0.0332026	-0.0123733	-0.022788			-0.00622056	-0.000876503
		-25	-0.0501339	-0.0407289	-0.0454314			-0.00175	-0.00113732
		-24.75	-0.0538714	-0.0440178	-0.0489446			-0.00364611	-0.00173605
		-24.5	-0.0421401	-0.0633844	-0.0527623	-0.00248155		-0.00128667	-0.00245176
		-24.25	-0.0297214	-0.0810067	-0.055364	-0.00517204		0.00121722	-0.00304526
		-24	-0.0238964	-0.0726956	-0.048296	-0.00767411		0.00183222	-0.00343026
		-23.75	-0.0175651	-0.0770733	-0.0473192	-0.0106575		0.00181389	-0.00361134
		-23.5	-0.0333526	-0.0714067	-0.0523796	-0.0136066		-0.00588222	-0.00422902
		-23.25	-0.0330464	-0.08704	-0.0600432	-0.0171913		-0.00251167	-0.00428003
		-23	-0.0263464	-0.07694	-0.0516432	-0.0200852		9.22222e-05	-0.00414216
		-22.75	-0.0191839	-0.0343178	-0.0267508	-0.0220709		-0.00238167	-0.00407748
		-22.5	-0.0072901	-0.0427289	-0.0250095	-0.0233616		0.0041	-0.00330693
		-22.25	-0.0108901	-0.0254289	-0.0181595	-0.023799		0.00522611	-0.00228605
		-22	-0.00385885	0.000815556	-0.00152165	-0.0239001		0.000996667	-0.00148935
		-21.75	-0.00140885	0.00436	0.00147557	-0.0243726		0.00442278	-0.000756699
		-21.5	-0.00824635	0.0153044	0.00352905	-0.0248721		-0.00034	-0.000674379
		-21.25	-0.0183589	0.0261711	0.00390613	-0.0255243		0.000452778	-0.000227353
		-21	-6.51042e-05	0.0397267	0.0198308	-0.024952		-0.00215444	1.18301e-05
		-20.75	0.0113911	0.0591933	0.0352922	-0.0233617		-0.000206111	0.000102647
		-20.5	0.0141849	0.0342822	0.0242336	-0.0218391		0.000242222	0.000331373
		-20.25	0.0198286	0.0394711	0.0296499	-0.0203277		-0.001665	0.000309118
		-20	0.0030224	0.0107378	0.00688009	-0.0194731		-0.000283333	0.00022085
		-19.75	0.0091224	0.0214156	0.015269	-0.018102		0.00279833	0.00027768
		-19.5	0.0207411	0.0254156	0.0230784	-0.0161078		-0.00105333	0.00010902
		-19.25	0.0265224	0.01506	0.0207912	-0.0132286		0.00300611	0.000631863
		-19	0.0324224	0.0183711	0.0253968	-0.00999636		0.00506556	0.00107758
		-18.75	0.0349911	0.0333378	0.0341645	-0.00621694		0.00870278	0.00158408
		-18.5	0.0310161	0.0170378	0.024027	-0.00276516		0.0103733	0.00233438
		-18.25	0.0254849	0.00830444	0.0168947	6.92172e-05		0.00932167	0.00264154
		-18	0.0249599	0.0155378	0.0202488	0.00300696		0.0103367	0.00294216
		-17.75	0.0244536	0.0154933	0.0199735	0.00615275		0.00704056	0.00329768
		-17.5	0.0380599	0.0137933	0.0259266	0.00989056		0.0092	0.00357869
		-17.25	0.0557349	0.00252667	0.0291308	0.0134025		0.016915	0.00459369
		-17	0.0434036	-0.00118444	0.0211096	0.0154834		0.0164967	0.00553745
		-16.75	0.0388036	-0.0127178	0.0130429	0.0171378		0.0159006	0.00659951
		-16.5	0.0272474	-0.0154067	0.00592036	0.0181848		0.0183711	0.00769229
		-16.25	0.0129849	-0.0303067	-0.00866089	0.0178744		0.0157861	0.00860663
		-16	0.0187974	-0.0113178	0.00373981	0.0179728		0.0143789	0.00955039
		-15.75	0.0246411	-0.0114844	0.00657835	0.0181054		0.0116383	0.0102517
		-15.5	0.0118536	0.0283822	0.0201179	0.0188102		0.0148089	0.0109582
		-15.25	0.00391615	0.000115556	0.00201585	0.0180357		0.0127906	0.0117725
		-15	-0.0022026	0.0107489	0.00427314	0.016687		0.0100389	0.0121862
		-14.75	-0.0026026	0.0110489	0.00422314	0.015817		0.0117317	0.0125783
		-14.5	0.00125365	0.0210822	0.0111679	0.0150135		0.00889111	0.0125894
		-14.25	0.0131349	0.00713778	0.0101363	0.015155		0.00791722	0.0124449
		-14	0.0109349	0.01296	0.0119474	0.0150106		0.00727667	0.0123246
		-13.75	0.0153411	0.0135044	0.0144228	0.0146343		0.0100806	0.0123096
		-13.5	0.00597865	0.02126	0.0136193	0.0143225		0.0123844	0.0126239
		-13.25	-0.0190839	0.02186	0.00138807	0.0132786		0.00997722	0.0126696
		-13	0.0036349	0.0601489	0.0318919	0.0131798		0.0171478	0.0126833
		-12.75	0.00131615	0.0546378	0.027977	0.0133515		0.010985	0.0123591
		-12.5	0.0086224	0.0582489	0.0334356	0.0140707		0.0119889	0.012129
		-12.25	0.0150349	0.0637489	0.0393919	0.014903		0.014715	0.011914
		-12	0.0219474	0.06046	0.0412037	0.0158261		0.0177856	0.0120316
		-11.75	0.0112286	0.0751822	0.0432054	0.0165773		0.0197672	0.0123485
		-11.5	0.0225849	0.0681267	0.0453558	0.0172828		0.0230822	0.0130217
		-11.25	0.0317099	0.0712489	0.0514794	0.0186032		0.0242528	0.0135772
		-11	0.0313224	0.0674044	0.0493634	0.0201823		0.0254456	0.0143216
		-10.75	0.0376849	0.0517822	0.0447336	0.0218699		0.0214606	0.0149935
		-10.5	0.0236474	0.0682378	0.0459426	0.0242439		0.0303533	0.0160889
		-10.25	0.0228599	0.0616378	0.0422488	0.0259182		0.029735	0.017315
		-10	0.0227161	0.0638378	0.043277	0.0275138		0.02965	0.0185934
		-9.75	0.0267536	0.0701822	0.0484679	0.0287464		0.0259761	0.0196934
		-9.5	0.0416224	0.0540044	0.0478134	0.0307376		0.0258578	0.0206214
		-9.25	0.0482599	0.0716933	0.0599766	0.0331595		0.0214617	0.0211554
		-9	0.0253536	0.0719156	0.0486346	0.0350905		0.0202322	0.0217586
		-8.75	0.0323536	0.0619822	0.0471679	0.0366557		0.0212028	0.0219972
		-8.5	0.0310474	0.0730378	0.0520426	0.0384777		0.0184956	0.022439
		-8.25	0.0206224	0.0541711	0.0373968	0.0395842		0.014055	0.0225605
		-8	0.0200849	0.0474822	0.0337836	0.040426		0.0191922	0.0228239
		-7.75	0.0347036	0.0339711	0.0343374	0.0413267		0.0193961	0.0229186
		-7.5	0.0419099	0.0322156	0.0370627	0.0428778		0.0161111	0.0227035
		-7.25	0.0421036	0.0349044	0.038504	0.0431653		0.0146594	0.0222081
		-7	0.0548474	0.0198822	0.0373648	0.0435735		0.0166189	0.021759
		-6.75	0.0561224	0.00419333	0.0301579	0.0434309		0.0185228	0.0213518
		-6.5	0.0636286	0.01066	0.0371443	0.0433332		0.0192378	0.021221
		-6.25	0.0670286	0.00679333	0.036911	0.0431466		0.0208639	0.0206628
		-6	0.0710849	0.0210044	0.0460447	0.04327		0.0198678	0.0200824
		-5.75	0.0610161	0.0329378	0.046977	0.0433405		0.014305	0.0191798
		-5.5	0.0594349	0.0365044	0.0479697	0.0431879		0.0149089	0.0185288
		-5.25	0.0560974	0.0354933	0.0457954	0.0430328		0.0193017	0.0181431
		-5	0.0758911	0.0341044	0.0549978	0.0434791		0.02025	0.0180718
		-4.75	0.0770974	0.03846	0.0577787	0.0439937		0.0185317	0.0179718
		-4.5	0.0890661	0.0196711	0.0543686	0.0445206		0.0186022	0.0178188
		-4.25	0.0996911	0.0228822	0.0612867	0.0453037		0.0158506	0.0176632
		-4	0.0965661	0.0134044	0.0549853	0.045587		0.01801	0.0178959
		-3.75	0.0919974	0.00508222	0.0485398	0.0456186		0.0241806	0.0181893
		-3.5	0.0942911	-0.00959556	0.0423478	0.0448521		0.0276289	0.0186736
		-3.25	0.0896161	0.0185156	0.0540659	0.0450883		0.0313106	0.0195677
		-3	0.0888286	0.00528222	0.0470554	0.0450834		0.0330033	0.0206467
		-2.75	0.0933036	0.0102933	0.0517985	0.0450728		0.0360517	0.0217898
		-2.5	0.0790849	-0.000473333	0.0393058	0.0451558		0.0399667	0.0230512
		-2.25	0.0745911	0.0291711	0.0518811	0.0459426		0.0389372	0.02421
		-2	0.0833724	0.0428044	0.0630884	0.0471927		0.04183	0.0254433
		-1.75	0.0785036	0.06566	0.0720818	0.0487152		0.0424561	0.0267721
		-1.5	0.0867411	0.0760044	0.0813728	0.0505791		0.0390489	0.0282276
		-1.25	0.102254	0.0891156	0.0956846	0.0531147		0.0388417	0.0296354
		-1	0.0895349	0.0740933	0.0818141	0.0553607		0.0360789	0.0306223
		-0.75	0.0785911	0.0806489	0.07962	0.0572074		0.0339939	0.0314308
		-0.5	0.0666474	0.0795822	0.0731148	0.0587815		0.0327089	0.0322647
		-0.25	0.0587724	0.0830044	0.0708884	0.0598617		0.0348128	0.0332183
		0	0.0692661	0.0754378	0.072352	0.0609649		0.0347611	0.0343307
		0.25	0.0501099	0.0659378	0.0580238	0.0614021		0.0354094	0.0353542
		0.5	0.0462224	0.0572267	0.0517245	0.0616599		0.0327022	0.0358554
		0.75	0.0512786	0.0412933	0.046286	0.0612811		0.033595	0.0362064
		1	0.0379536	0.0356378	0.0367957	0.0603688		0.0316544	0.0362266
		1.25	0.0400286	0.00260444	0.0213165	0.0589317		0.0327694	0.0362128
		1.5	0.0689099	0.02016	0.0445349	0.0582034		0.03244	0.0360004
		1.75	0.0637536	0.0280044	0.045879	0.0578075		0.0277772	0.0352834
		2	0.0683911	0.0276378	0.0480145	0.0577846		0.0233033	0.0343637
		2.25	0.104785	0.0270489	0.0659169	0.0588094		0.028285	0.033567
		2.5	0.0916036	0.0154711	0.0535374	0.0587864		0.0304778	0.0328624
		2.75	0.0856474	0.00186	0.0437537	0.0586428		0.0296372	0.0323087
		3	0.0918661	0.0252822	0.0585742	0.0589374		0.0268522	0.0316035
		3.25	0.105772	0.0298044	0.0677884	0.0601758		0.0246783	0.0309328
		3.5	0.113722	0.0504933	0.0821079	0.06149		0.0260822	0.0304675
		3.75	0.134035	0.0348044	0.0844197	0.0624175		0.0247861	0.0300014
		4	0.135304	0.03676	0.0860318	0.063024		0.0284678	0.0296282
		4.25	0.146241	0.0505267	0.0983839	0.0637636		0.0264606	0.0291399
		4.5	0.155247	0.0495933	0.10242	0.0640565		0.0224533	0.0283778
		4.75	0.162747	0.0568044	0.109776	0.0652722		0.016635	0.0274326
		5	0.185022	0.0464044	0.115713	0.0668415		0.0182611	0.0265307
		5.25	0.180722	0.0474378	0.11408	0.0686226		0.0165539	0.0256424
		5.5	0.167791	0.0632489	0.11552	0.0705631		0.02378	0.0251136
		5.75	0.181729	0.0665711	0.12415	0.0728152		0.023395	0.0245815
		6	0.174779	0.0657156	0.120247	0.0755205		0.0272433	0.0245501
		6.25	0.141966	0.0448711	0.0934186	0.0773333		0.0280917	0.0248318
		6.5	0.151022	0.0339044	0.0924634	0.079341		0.0387844	0.0254494
		6.75	0.153247	0.0432933	0.0982704	0.0820138		0.0363328	0.0257938
		7	0.145604	0.0535156	0.0995596	0.0854157		0.0397922	0.0263912
		7.25	0.154372	0.0777378	0.116055	0.0885253		0.0440072	0.0274003
		7.5	0.159729	0.0698267	0.114778	0.0915209		0.0415889	0.028395
		7.75	0.15366	0.0730489	0.113354	0.0943617		0.0355817	0.0289538
		8	0.152304	0.0641044	0.108204	0.0962003		0.0329633	0.0294348
		8.25	0.162991	0.0753489	0.11917	0.0990539		0.0336339	0.0297387
		8.5	0.17146	0.0899711	0.130716	0.102835		0.0303378	0.0299668
		8.75	0.17511	0.0938489	0.134479	0.106135		0.022975	0.0299975
		9	0.159041	0.0874267	0.123234	0.108546		0.0276456	0.0306452
		9.25	0.159685	0.0639156	0.1118	0.109837		0.027605	0.0311948
		9.5	0.168272	0.0481933	0.108233	0.110872		0.0277311	0.0318523
		9.75	0.166779	0.0529933	0.109886	0.111909		0.0390683	0.0327516
		10	0.168391	0.03366	0.101026	0.112024		0.0448944	0.0340163
		10.25	0.181404	0.0525933	0.116998	0.112658		0.0439428	0.0349986
		10.5	0.185654	0.0494378	0.117546	0.112996		0.0408911	0.0357515
		10.75	0.18711	0.0494822	0.118296	0.113108		0.0422172	0.0359534
		11	0.19406	0.0370044	0.115532	0.113171		0.0394544	0.0361371
		11.25	0.192291	0.0295267	0.110909	0.112971		0.0365806	0.0359481
		11.5	0.193416	0.0370822	0.115249	0.112584		0.0373178	0.0355546
		11.75	0.193972	0.0272933	0.110633	0.112166		0.0386883	0.035384
		12	0.198766	0.01026	0.104513	0.112648		0.0322922	0.0351905
		12.25	0.195191	0.00119333	0.0981922	0.112897		0.0331961	0.0352042
		12.5	0.197935	-0.0112956	0.0933197	0.112682		0.0360222	0.0353447
		12.75	0.18976	-0.0185956	0.0855822	0.112074		0.0396706	0.0358937
		13	0.199529	-0.0155622	0.0919832	0.111028		0.0381744	0.0367878
		13.25	0.204716	0.00604889	0.105383	0.110619		0.0421783	0.0376426
		13.5	0.198154	0.0292044	0.113679	0.110633		0.0428933	0.038542
		13.75	0.198941	0.02386	0.111401	0.110772		0.0407861	0.0393099
		14	0.19746	0.03866	0.11806	0.110724		0.0367233	0.039172
		14.25	0.19986	0.0436933	0.121777	0.110335		0.0417494	0.038987
		14.5	0.206866	0.0694378	0.138152	0.110495		0.0399867	0.0387542
		14.75	0.209004	0.0650933	0.137048	0.111096		0.0396461	0.038681
		15	0.217416	0.0620489	0.139733	0.11231		0.0413278	0.0386287
		15.25	0.219972	0.0613378	0.140655	0.11372		0.0474539	0.0390992
		15.5	0.212497	0.0386156	0.125556	0.114401		0.0497244	0.0398724
		15.75	0.226347	0.0275267	0.126937	0.115528		0.0485283	0.0405319
		16	0.224654	0.0280267	0.12634	0.115934		0.0519544	0.0413122
		16.25	0.215447	0.03966	0.127554	0.116369		0.0545139	0.0426194
		16.5	0.202379	0.04376	0.123069	0.116576		0.05614	0.043969
		16.75	0.208591	0.0397267	0.124159	0.116951		0.0569217	0.0451984
		17	0.20786	0.04776	0.12781	0.117686		0.0596922	0.0463761
		17.25	0.201122	0.0546044	0.127863	0.118235		0.0507628	0.0471166
		17.5	0.215354	0.04996	0.132657	0.119192		0.0450556	0.0472859
		17.75	0.215116	0.0528822	0.133999	0.120474		0.043115	0.0472989
		18	0.224285	0.0640822	0.144184	0.122474		0.0456967	0.0475878
		18.25	0.221441	0.0609156	0.141178	0.124555		0.0447006	0.048057
		18.5	0.216685	0.0419933	0.129339	0.126457		0.0442489	0.0482041
		18.75	0.21706	0.0288489	0.122954	0.127804		0.041875	0.0483151
		19	0.213916	0.0337156	0.123816	0.128605		0.0449233	0.0486256
		19.25	0.212579	0.0409156	0.126747	0.129173		0.0458494	0.0488915
		19.5	0.219697	0.0334267	0.126562	0.129833		0.0540422	0.0492791
		19.75	0.213072	0.0222378	0.117655	0.129815		0.0576794	0.049747
		20	0.212266	0.0497267	0.130996	0.130216		0.0560944	0.0501921
		20.25	0.222135	0.05076	0.136447	0.130142		0.054965	0.0503692
		20.5	0.22716	0.05596	0.14156	0.130338		0.0574356	0.050541
		20.75	0.234591	0.0638711	0.149231	0.130751		0.0610061	0.0508273
		21	0.232366	0.0701933	0.15128	0.131213		0.0597544	0.0509939
		21.25	0.233391	0.0530044	0.143198	0.13198		0.0557139	0.0507599
		21.5	0.218504	0.0350489	0.126776	0.131973		0.0528622	0.0508834
		21.75	0.222297	0.0646044	0.143451	0.132717		0.0473439	0.051018
		22	0.207404	0.08746	0.147432	0.133581		0.0511589	0.0514912
		22.25	0.214904	0.0788489	0.146876	0.134616		0.0590739	0.0522781
		22.5	0.219104	0.0453711	0.132237	0.134967		0.0592111	0.0531316
		22.75	0.209835	0.05256	0.131197	0.135115		0.0602928	0.0540754
		23	0.202422	0.0494044	0.125913	0.13503		0.0576856	0.0550054
		23.25	0.209222	0.0523156	0.130769	0.134948		0.058645	0.0558126
		23.5	0.193697	0.0536044	0.123651	0.134498		0.0604489	0.0566714
		23.75	0.197679	0.0553711	0.126525	0.13373		0.0626639	0.0571785
		24	0.199016	0.0207044	0.10986	0.132368		0.0627456	0.0574765
		24.25	0.194054	0.01536	0.104707	0.131297		0.063805	0.0579301
		24.5	0.187272	0.00198222	0.0946273	0.130066		0.06292	0.058398
		24.75	0.186716	0.0122378	0.099477	0.129008		0.0602239	0.0585621
		25	0.183772	1.55556e-05	0.091894	0.127492		0.0601278	0.0585104
		25.25	0.188554	-0.00648444	0.0910346	0.125948		0.0596428	0.0585038
		25.5	0.193366	-0.00875111	0.0923075	0.124846		0.0562689	0.0585365
		25.75	0.199704	-0.00772889	0.0959874	0.123323		0.0538506	0.0585946
		26	0.212035	0.00704889	0.109542	0.122154		0.0537322	0.0589704
		26.25	0.220647	0.00177111	0.111209	0.120834		0.0612472	0.0595638
		26.5	0.216729	0.0147933	0.115761	0.119379		0.0563733	0.059405
		26.75	0.229754	0.0300822	0.129918	0.11845		0.0489439	0.058801
		27	0.23981	0.0453933	0.142602	0.118424		0.0545589	0.0584637
		27.25	0.230829	0.0500044	0.140417	0.119017		0.0539294	0.0582428
		27.5	0.244854	0.0610822	0.152968	0.119431		0.0504222	0.0577591
		27.75	0.235341	0.0485156	0.141928	0.119192		0.0551928	0.0574499
		28	0.24846	0.05996	0.15421	0.119511		0.0580411	0.057178
		28.25	0.254754	0.0448933	0.149823	0.120275		0.0609561	0.0570727
		28.5	0.261041	0.05396	0.157501	0.121419		0.0578822	0.0567243
		28.75	0.263829	0.0518378	0.157833	0.122807		0.0555528	0.0562909
		29	0.268329	0.0586156	0.163472	0.124228		0.0594678	0.0562465
		29.25	0.273585	0.0575378	0.165561	0.126051		0.0562161	0.0560164
		29.5	0.26981	0.0446822	0.157246	0.127386		0.0546867	0.0557248
		29.75	0.257804	0.0473044	0.152554	0.129243		0.057735	0.0558111
		30	0.253791	0.0715489	0.16267	0.131763		0.0613722	0.0562535
		30.25	0.244116	0.0879044	0.16601	0.134866		0.0581317	0.0565123
		30.5	0.239816	0.0927822	0.166299	0.137772		0.0518244	0.055958
		30.75	0.236354	0.107782	0.172068	0.141257		0.0503839	0.0556057
		31	0.246385	0.103749	0.175067	0.144911		0.0561322	0.0560286
		31.25	0.252854	0.0989044	0.175879	0.148545		0.0560694	0.0561174
		31.5	0.260435	0.0909267	0.175681	0.15201		0.0601844	0.0564854
		31.75	0.275741	0.118338	0.197039	0.155814		0.0638106	0.0572729
		32	0.265029	0.123527	0.194278	0.159425		0.0633256	0.0577513
		32.25	0.264954	0.119782	0.192368	0.162756		0.0594517	0.0578343
		32.5	0.262535	0.0870156	0.174775	0.164707		0.0608333	0.0578271
		32.75	0.255097	0.0834933	0.169295	0.165867		0.062415	0.0580937
		33	0.260997	0.0776822	0.16934	0.167125		0.0660411	0.0587107
		33.25	0.260391	0.0848933	0.172642	0.16798		0.0628339	0.0589087
		33.5	0.273429	0.0724822	0.172955	0.169329		0.06116	0.0591995
		33.75	0.27481	0.0800267	0.177418	0.170338		0.0594306	0.0594785
		34	0.273154	0.0672378	0.170196	0.171224		0.0544567	0.0592857
		34.25	0.284154	0.0487933	0.166473	0.171614		0.0572494	0.0590432
		34.5	0.291772	0.0581711	0.174972	0.172359		0.0522644	0.058698
		34.75	0.293897	0.0481711	0.171034	0.172688		0.0542572	0.0588411
		35	0.28676	0.0585156	0.172638	0.172996		0.0611056	0.0594718
		35.25	0.284147	0.0659156	0.175031	0.173769		0.061865	0.0598091
		35.5	0.290085	0.0660489	0.178067	0.174878		0.06468	0.0603156
		35.75	0.281985	0.0630489	0.172517	0.175306		0.0698061	0.0608815
		36	0.279454	0.0578933	0.168673	0.175422		0.06951	0.0612168
		36.25	0.282304	0.0522933	0.167298	0.175465		0.0787472	0.062124
		36.5	0.29266	0.0598156	0.176238	0.175647		0.0816844	0.0634318
		36.75	0.297597	0.0628267	0.180212	0.17587		0.0904661	0.0651749
		37	0.296166	0.08626	0.191213	0.176537		0.0867478	0.0666062
		37.25	0.290422	0.08906	0.189741	0.177149		0.0845739	0.0676964
		37.5	0.286497	0.0899267	0.188212	0.176765		0.0809556	0.0687624
		37.75	0.292466	0.0870267	0.189746	0.176568		0.0796817	0.0698519
		38	0.291829	0.0763711	0.1841	0.176208		0.0760744	0.0708309
		38.25	0.284104	0.0620933	0.173098	0.176135		0.0771117	0.0721636
		38.5	0.289816	0.0600711	0.174944	0.176381		0.0729489	0.0730871
		38.75	0.289179	0.0592711	0.174225	0.176593		0.068275	0.0740289
		39	0.283204	0.0564822	0.169843	0.176472		0.0666011	0.074755
		39.25	0.278622	0.0457711	0.162197	0.176004		0.070805	0.0753255
		39.5	0.268766	0.04346	0.156113	0.175077		0.0702978	0.0758216
		39.75	0.275641	0.0562378	0.165939	0.174892		0.072035	0.0762542
		40	0.288641	0.0362044	0.162423	0.174716		0.0732389	0.0764561
		40.25	0.298304	0.0657156	0.18201	0.175022		0.068865	0.0764182
		40.5	0.296447	0.0745711	0.185509	0.175652		0.0712578	0.0759776
		40.75	0.29416	0.0678933	0.181027	0.176016		0.0691394	0.0752397
		41	0.293891	0.0865489	0.19022	0.176677		0.0722878	0.0741704
		41.25	0.298685	0.0737489	0.186217	0.177031		0.0701917	0.0731965
		41.5	0.297985	0.0752822	0.186634	0.177645		0.06864	0.0722592
		41.75	0.287585	0.0821267	0.184856	0.178348		0.0695994	0.0715912
		42	0.297241	0.0654711	0.181356	0.17896		0.0692144	0.0709755
		42.25	0.298504	0.0831933	0.190848	0.179595		0.0673628	0.070463
		42.5	0.286197	0.0522156	0.169206	0.179116		0.0759889	0.070397
		42.75	0.295566	0.0700933	0.18283	0.178752		0.0719261	0.0703368
		43	0.302354	0.08126	0.191807	0.178842		0.0747078	0.0707152
		43.25	0.313916	0.0636822	0.188799	0.178867		0.0741894	0.0711616
		43.5	0.303466	0.06066	0.182063	0.178533		0.0738156	0.0713387
		43.75	0.296635	0.0728489	0.184742	0.178561		0.0756528	0.0716537
		44	0.287847	0.0774489	0.182648	0.178976		0.0711122	0.0715994
		44.25	0.276441	0.0902156	0.183328	0.179341		0.0684383	0.071317
		44.5	0.278847	0.0737711	0.176309	0.179431		0.0747422	0.0716627
		44.75	0.271166	0.0877378	0.179452	0.179849		0.0728017	0.0717536
		45	0.274666	0.0850267	0.179846	0.180617		0.0767389	0.0722006
		45.25	0.267179	0.0886378	0.177908	0.181564		0.0741872	0.0723123
		45.5	0.271385	0.107116	0.18925	0.182578		0.0702356	0.0723149
		45.75	0.290972	0.115193	0.203083	0.184346		0.0736172	0.0726077
		46	0.294335	0.0958822	0.195109	0.184915		0.0707544	0.0726756
		46.25	0.293772	0.0898489	0.191811	0.185189		0.074325	0.0729762
		46.5	0.292635	0.0857267	0.189181	0.185544		0.0805511	0.073752
		46.75	0.287166	0.0957267	0.191446	0.185597		0.0754883	0.0737226
		47	0.27996	0.0963822	0.188171	0.185682		0.0751478	0.0739121
		47.25	0.276547	0.0883711	0.182459	0.1855		0.0775739	0.0740807
		47.5	0.279129	0.104049	0.191589	0.185793		0.0754778	0.0741565
		47.75	0.27891	0.08156	0.180235	0.185744		0.0771928	0.0743551
		48	0.286185	0.0828822	0.184534	0.18547		0.07733	0.0744538
		48.25	0.282604	0.0846378	0.183621	0.186097		0.0803117	0.0749949
		48.5	0.291029	0.0673156	0.179172	0.185938		0.0837933	0.0758982
		48.75	0.301497	0.0626822	0.18209	0.185515		0.0824417	0.0763511
		49	0.304816	0.0753933	0.190105	0.185572		0.08169	0.0768739
		49.25	0.31556	0.0911822	0.203371	0.186498		0.084205	0.0773131
		49.5	0.313285	0.105938	0.209611	0.18758		0.0786867	0.0775778
		49.75	0.304766	0.0910933	0.19793	0.188244		0.0798128	0.0781411
		50	0.297929	0.0829933	0.190461	0.188554		0.0837833	0.0787392
		50.25	0.295129	0.104649	0.199889	0.189579		0.0840428	0.0795208
		50.5	0.298235	0.109371	0.203803	0.190638		0.0867578	0.0802522
		50.75	0.290816	0.113949	0.202383	0.191618		0.0860283	0.0805743
		51	0.306735	0.116038	0.211386	0.193073		0.0821322	0.0809652
		51.25	0.30816	0.115016	0.211588	0.194045		0.0852694	0.0815606
		51.5	0.319785	0.0950044	0.207395	0.194232		0.08114	0.0817703
		51.75	0.329622	0.101982	0.215802	0.195132		0.0843106	0.0822899
		52	0.331216	0.121427	0.226321	0.196632		0.0850256	0.0827507
		52.25	0.349297	0.145471	0.247384	0.199163		0.081785	0.0830127
		52.5	0.33371	0.143138	0.238424	0.201205		0.0810556	0.0830565
		52.75	0.331241	0.148549	0.239895	0.203454		0.0817817	0.0829381
		53	0.31721	0.158438	0.237824	0.205861		0.0786189	0.0827133
		53.25	0.319222	0.170082	0.244652	0.208168		0.0818006	0.0827198
		53.5	0.320979	0.145971	0.233475	0.210483		0.0797044	0.082455
		53.75	0.321685	0.16666	0.244172	0.213076		0.0829528	0.082706
		54	0.326072	0.140504	0.233288	0.215236		0.0846344	0.0829896
		54.25	0.327697	0.138216	0.232956	0.217574		0.0889606	0.0832942
		54.5	0.331854	0.150682	0.241268	0.220147		0.0899978	0.0836444
		54.75	0.334722	0.141071	0.237897	0.222225		0.0916683	0.0839333
		55	0.32141	0.144516	0.232963	0.223512		0.0878278	0.0840392
		55.25	0.324066	0.155593	0.23983	0.224825		0.0918539	0.084611
		55.5	0.328185	0.151782	0.239984	0.226654		0.08808	0.0847763
		55.75	0.322791	0.161482	0.242137	0.228901		0.0926394	0.0854528
		56	0.316297	0.145749	0.231023	0.230254		0.0893878	0.0857514
		56.25	0.307241	0.16196	0.234601	0.231593		0.084525	0.085722
		56.5	0.316616	0.152727	0.234671	0.232997		0.0810511	0.0856788
		56.75	0.320766	0.128427	0.224596	0.233572		0.0808217	0.0856651
		57	0.334822	0.12286	0.228841	0.234322		0.0770256	0.0853853
		57.25	0.326654	0.108116	0.217385	0.234756		0.0756628	0.0852114
		57.5	0.327404	0.0958489	0.211626	0.234575		0.0724889	0.0846637
		57.75	0.327929	0.08336	0.205644	0.233676		0.0749039	0.0843813
		58	0.325885	0.102038	0.213961	0.232222		0.0709967	0.083678
		58.25	0.332441	0.0995156	0.215978	0.231246		0.0745006	0.0830819
		58.5	0.33466	0.113204	0.223932	0.230552		0.0775267	0.0824093
		58.75	0.33761	0.115282	0.226446	0.230058		0.0744972	0.0814975
		59	0.344097	0.117082	0.23059	0.229446		0.0787567	0.080738
		59.25	0.344529	0.106127	0.225328	0.229092		0.0853939	0.0805948
		59.5	0.328872	0.149871	0.239372	0.228883		0.0901867	0.0804967
		59.75	0.320216	0.161093	0.240655	0.229204		0.0918461	0.0807183
		60	0.326097	0.172638	0.249368	0.229917		0.0990056	0.0810927
		60.25	0.327816	0.149171	0.238494	0.229797		0.0959094	0.0814764
		60.5	0.329422	0.14896	0.239191	0.229853		0.09438	0.0820561
		60.75	0.329541	0.142216	0.235878	0.22998		0.0918839	0.0826933
		61	0.323429	0.130449	0.226939	0.229419		0.0942989	0.0834861
		61.25	0.323972	0.146504	0.235238	0.229213		0.0902694	0.0842651
		61.5	0.319079	0.137838	0.228458	0.228618		0.0842844	0.0847723
		61.75	0.312616	0.113293	0.212955	0.227833		0.0859328	0.0855631
		62	0.310185	0.103738	0.206961	0.226631		0.08277	0.0860258
		62.25	0.307135	0.0852822	0.196209	0.224958		0.0827406	0.0867166
		62.5	0.306485	0.111971	0.209228	0.22429		0.0882222	0.0875238
		62.75	0.311429	0.103793	0.207611	0.223367		0.0878706	0.0881323
		63	0.303685	0.0916711	0.197678	0.22251		0.0936189	0.0892571
		63.25	0.296685	0.0991156	0.1979	0.221914		0.0961228	0.0902786
		63.5	0.310022	0.0847933	0.197408	0.221556		0.0956933	0.0908844
		63.75	0.315235	0.0863378	0.200786	0.220983		0.0986528	0.0913825
		64	0.323935	0.0880933	0.206014	0.22055		0.0954233	0.0915929
		64.25	0.322435	0.112471	0.217453	0.220268		0.0976494	0.0915131
		64.5	0.317954	0.11496	0.216457	0.219833		0.0955311	0.0914908
		64.75	0.316722	0.113893	0.215308	0.219169		0.0950794	0.091532
		65	0.31966	0.12686	0.22326	0.219079		0.0953167	0.0917339
		65.25	0.32281	0.114049	0.218429	0.218169		0.0938206	0.0917058
		65.5	0.318516	0.103304	0.21091	0.216875		0.0954689	0.0920116
		65.75	0.334535	0.116916	0.225725	0.215847		0.0953839	0.0926645
		66	0.333116	0.131927	0.232521	0.215588		0.0956322	0.0932351
		66.25	0.331091	0.131116	0.231103	0.215236		0.0911694	0.0937292
		66.5	0.330741	0.09996	0.215351	0.214344		0.0950733	0.0944546
		66.75	0.325529	0.102904	0.214217	0.21379		0.0947217	0.094837
		67	0.333597	0.103749	0.218673	0.21307		0.0921811	0.0950905
		67.25	0.330879	0.115316	0.223097	0.212837		0.0944406	0.0951389
		67.5	0.317035	0.121227	0.219131	0.213106		0.0922444	0.0949107
		67.75	0.324679	0.128549	0.226614	0.21396		0.0915261	0.0946656
		68	0.313066	0.116816	0.214941	0.214775		0.0935522	0.0943656
		68.25	0.316879	0.10276	0.209819	0.2148		0.0904672	0.094074
		68.5	0.315516	0.102738	0.209127	0.214866		0.0943378	0.0938792
		68.75	0.318254	0.116416	0.217335	0.215721		0.0937861	0.0937766
		69	0.32321	0.11596	0.219585	0.216664		0.09309	0.0936595
		69.25	0.321966	0.102482	0.212224	0.217308		0.0965494	0.0937321
		69.5	0.32856	0.0987822	0.213671	0.217868		0.0942311	0.0937562
		69.75	0.321666	0.106293	0.21398	0.218214		0.0960017	0.0937875
		70	0.325172	0.102449	0.213811	0.218056		0.0945944	0.0937411
		70.25	0.332022	0.104993	0.218508	0.218145		0.0926094	0.0935633
		70.5	0.344735	0.12296	0.233847	0.218951		0.0952467	0.0938031
		70.75	0.344754	0.122816	0.233785	0.219409		0.0947172	0.0937822
		71	0.34176	0.112838	0.227299	0.219794		0.0925878	0.0936567
		71.25	0.35146	0.11866	0.23506	0.220844		0.0918028	0.0936344
		71.5	0.351747	0.128704	0.240226	0.221475		0.0889289	0.0933102
		71.75	0.351341	0.118249	0.234795	0.221574		0.0872328	0.0930154
		72	0.357541	0.132038	0.244789	0.222169		0.0851589	0.0926408
		72.25	0.351254	0.149849	0.250551	0.223699		0.0882517	0.0923291
		72.5	0.357829	0.140271	0.24905	0.225214		0.0892	0.0922545
		72.75	0.356797	0.154438	0.255618	0.22682		0.0867039	0.0918055
		73	0.35346	0.159671	0.256566	0.228275		0.0872078	0.0914185
		73.25	0.359691	0.161393	0.260542	0.230076		0.0890561	0.0911812
		73.5	0.361129	0.167138	0.264133	0.231707		0.0923378	0.0909335
		73.75	0.358866	0.167382	0.263124	0.233802		0.097475	0.0911243
		74	0.367422	0.182238	0.27483	0.236628		0.100834	0.0914086
		74.25	0.360691	0.176871	0.268781	0.239222		0.106483	0.0921079
		74.5	0.351091	0.189949	0.27052	0.241535		0.105842	0.0928863
		74.75	0.361897	0.197749	0.279823	0.244154		0.109257	0.0937104
		75	0.36261	0.199782	0.281196	0.247152		0.112428	0.0947522
		75.25	0.355022	0.180371	0.267697	0.249501		0.117665	0.0962274
		75.5	0.35116	0.195571	0.273366	0.252083		0.115347	0.0976123
		75.75	0.351604	0.219271	0.285437	0.255198		0.114495	0.0991162
		76	0.343547	0.240038	0.291793	0.258384		0.111154	0.100523
		76.25	0.350135	0.24786	0.298997	0.261216		0.115136	0.102287
		76.5	0.345254	0.233738	0.289496	0.263639		0.111351	0.103645
		76.75	0.348241	0.227116	0.287678	0.266264		0.111622	0.104964
		77	0.351466	0.253238	0.302352	0.26919		0.107103	0.106164
		77.25	0.347141	0.241527	0.294334	0.271542		0.107896	0.107381
		77.5	0.352154	0.252516	0.302335	0.274479		0.1023	0.10816
		77.75	0.354654	0.253138	0.303896	0.277048		0.102782	0.108775
		78	0.35571	0.225593	0.290652	0.278792		0.10413	0.109166
		78.25	0.35591	0.20306	0.279485	0.280115		0.108923	0.109642
		78.5	0.355329	0.174449	0.264889	0.280518		0.104727	0.109539
		78.75	0.344854	0.166671	0.255762	0.280483		0.111242	0.109856
		79	0.351304	0.149082	0.250193	0.280033		0.112246	0.110032
		79.25	0.354641	0.112249	0.233445	0.278699		0.118349	0.11038
		79.5	0.359116	0.0827489	0.220933	0.276865		0.116642	0.11032
		79.75	0.356647	0.0812711	0.218959	0.274436		0.119491	0.110564
		80	0.355854	0.0734378	0.214646	0.272082		0.121272	0.110963
		80.25	0.363729	0.0843822	0.224055	0.270062		0.118087	0.11137
		80.5	0.370435	0.08766	0.229047	0.267854		0.114913	0.111357
		80.75	0.371085	0.115438	0.243261	0.266205		0.117495	0.111719
		81	0.381685	0.123227	0.252456	0.265542		0.113021	0.111801
		81.25	0.384341	0.136216	0.260278	0.264973		0.111492	0.112059
		81.5	0.377666	0.150116	0.263891	0.264036		0.114573	0.112452
		81.75	0.383129	0.173527	0.278328	0.263451		0.120611	0.113529
		82	0.376704	0.180327	0.278515	0.26256		0.121292	0.114618
		82.25	0.382704	0.18176	0.282232	0.262244		0.125374	0.115868
		82.5	0.388397	0.17396	0.281179	0.261962		0.121756	0.116622
		82.75	0.386166	0.178504	0.282335	0.261092		0.124015	0.117757
		83	0.382835	0.170671	0.276753	0.260327		0.125686	0.118607
		83.25	0.387616	0.191982	0.289799	0.259782		0.126012	0.119417
		83.5	0.401047	0.188471	0.294759	0.259385		0.128671	0.120024
		83.75	0.403197	0.197927	0.300562	0.259816		0.123331	0.120417
		84	0.409666	0.192627	0.301146	0.260758		0.11809	0.120335
		84.25	0.413316	0.19716	0.305238	0.262512		0.117761	0.120128
		84.5	0.41351	0.196004	0.304757	0.264642		0.114998	0.119946
		84.75	0.417385	0.195416	0.3064	0.267086		0.118268	0.120144
		85	0.408604	0.188571	0.298587	0.269918		0.117394	0.120138
		85.25	0.40781	0.200438	0.304124	0.273535		0.114954	0.120252
		85.5	0.408329	0.202493	0.305411	0.277294		0.113124	0.120348
		85.75	0.401535	0.210138	0.305836	0.281259		0.107095	0.119908
		86	0.40371	0.205804	0.304757	0.284768		0.106177	0.119059
		86.25	0.400541	0.21296	0.306751	0.288146		0.109247	0.11835
		86.5	0.397116	0.214027	0.305571	0.290855		0.107296	0.117287
		86.75	0.406447	0.211493	0.30897	0.293312		0.111888	0.116706
		87	0.41121	0.203082	0.307146	0.29535		0.11487	0.116168
		87.25	0.402266	0.189904	0.296085	0.29675		0.111329	0.115324
		87.5	0.398672	0.16676	0.282716	0.296941		0.112078	0.114504
		87.75	0.411866	0.156049	0.283958	0.297177		0.112804	0.113571
		88	0.417166	0.156149	0.286658	0.29737		0.118352	0.113278
		88.25	0.401985	0.138782	0.270384	0.2969		0.123167	0.113577
		88.5	0.400791	0.142382	0.271587	0.296433		0.124749	0.113988
		88.75	0.391266	0.139671	0.265469	0.295942		0.124653	0.114556
		89	0.390016	0.156382	0.273199	0.295221		0.115446	0.11439
		89.25	0.394597	0.178693	0.286645	0.294868		0.113794	0.114178
		89.5	0.40846	0.205793	0.307127	0.295153		0.121431	0.114559
		89.75	0.411041	0.217171	0.314106	0.295717		0.118135	0.114854
		90	0.409347	0.19926	0.304304	0.295676		0.118628	0.115532
		90.25	0.41581	0.199582	0.307696	0.295804		0.115565	0.116084
		90.5	0.418047	0.200327	0.309187	0.295925		0.107869	0.116003
		90.75	0.425679	0.200804	0.313242	0.296562		0.107684	0.116026
		91	0.423922	0.198949	0.311436	0.29688		0.104066	0.115566
		91.25	0.438122	0.193138	0.31563	0.297324		0.105681	0.115025
		91.5	0.437004	0.147371	0.292187	0.296731		0.0994956	0.114329
		91.75	0.41981	0.106571	0.263191	0.294924		0.0924106	0.113172
		92	0.412779	0.0681156	0.240447	0.292041		0.0833922	0.111442
		92.25	0.417666	0.0733267	0.245496	0.289429		0.0723406	0.108736
		92.5	0.416091	0.0356489	0.22587	0.285816		0.0613333	0.105098
		92.75	0.41946	0.0352044	0.227332	0.282346		0.0506039	0.100737
		93	0.414235	0.0167489	0.215492	0.278842		0.0376411	0.0956185
		93.25	0.413229	0.00210444	0.207667	0.275579		0.0292006	0.0905453
		93.5	0.401335	-0.0170622	0.192136	0.271586		0.0173267	0.0848707
		93.75	0.401372	-0.0177289	0.191822	0.267463		0.0166639	0.0787079
		94	0.398566	-0.0268844	0.185841	0.263787		0.00532333	0.072072
		94.25	0.392535	-0.00891778	0.191809	0.260319		0.00253833	0.0652432
		94.5	0.387341	-0.0176178	0.184862	0.256814		0.00278667	0.0586092
		94.75	0.388791	-0.0175067	0.185642	0.253007		-0.000453889	0.0522372
		95	0.385141	-0.0305289	0.177306	0.248253		0.00745	0.0463411
		95.25	0.37821	-0.0318844	0.173163	0.242429		0.00533167	0.0405332
		95.5	0.377566	-0.0466178	0.165474	0.235967		0.00838	0.0348097
		95.75	0.382916	-0.0384289	0.172244	0.230225		0.00717278	0.0293789
		96	0.380291	-0.0180956	0.181098	0.224721		0.000254444	0.023958
		96.25	0.372047	-0.0120956	0.179976	0.219103		0.00194722	0.0191671
		96.5	0.37151	-0.00306222	0.184224	0.213493		0.00589556	0.0152586
		96.75	0.35891	0.00657111	0.182741	0.207898		0.00799944	0.0121213
		97	0.354066	0.0229378	0.188502	0.20237		0.0135256	0.0099402
		97.25	0.344604	0.0437267	0.194165	0.198109		0.00691833	0.00813297
		97.5	0.333066	0.0421822	0.187624	0.194823		0.00454444	0.00668261
		97.75	0.316716	0.0670267	0.191871	0.192711		0.00680389	0.00606363
		98	0.311385	0.0630822	0.187234	0.190178		0.00766333	0.00553418
		98.25	0.309016	0.0548378	0.181927	0.188267		0.00581167	0.00556291
		98.5	0.299816	0.08806	0.193938	0.186815		0.00633778	0.00578641
		98.75	0.277172	0.0862711	0.181722	0.185347		0.00389722	0.00585173
		99	0.265697	0.0802711	0.172984	0.183839		-0.000632222	0.00584124
		99.25	0.245672	0.0747267	0.1602	0.182451		-0.00155056	0.0053118
		99.5	0.234354	0.0747822	0.154568	0.180831		0.00222	0.00512876
		99.75	0.213047	0.0656044	0.139326	0.178809		0.002935	0.00480846
		100	0.200279	0.0520711	0.126175	0.175955		0.00108333	0.00445026
		100.25	0.193285	0.0557156	0.1245	0.173331		0.00265389	0.00459141
		100.5	0.17641	0.0657489	0.121079	0.170523		0.00490222	0.00476523
		100.75	0.178172	0.0474378	0.112805	0.167719		0.00830611	0.00490703
		101	0.175266	0.01216	0.0937131	0.164265		0.00404333	0.00467431
		101.25	0.168422	0.0144044	0.0914134	0.161045		0.00371389	0.00409716
		101.5	0.164422	0.0192933	0.0918579	0.15755		-0.00104889	0.0036285
		101.75	0.161497	0.00180444	0.0816509	0.153226		-0.00443389	0.00310036
		102	0.153035	0.0267378	0.0898863	0.149309		-0.00621889	0.00233431
		102.25	0.140566	0.0196378	0.080102	0.144782		-0.0105928	0.00126042
		102.5	0.139141	0.00290444	0.0710228	0.139925		-0.00514444	0.000615948
		102.75	0.128804	0.00376	0.0662818	0.134611		-0.00277389	7.99673e-05
		103	0.123572	0.00579333	0.0646829	0.128981		-0.00737	-0.00058281
		103.25	0.12841	0.0262267	0.0773183	0.124185		-7.72222e-05	-0.000550163
		103.5	0.116135	0.0237044	0.0699197	0.118883		-0.000328889	-0.000478301
		103.75	0.111835	0.0161044	0.0639697	0.113524		0.00196389	-0.000493366
		104	0.10851	0.0233489	0.0659294	0.10848		-0.000321111	-0.000684902
		104.25	0.101266	0.0288933	0.0650797	0.102878		0.00847167	-0.000250294
		104.5	0.0989161	0.0502711	0.0745936	0.0982199		0.0149089	0.000470588
		104.75	0.0912599	0.0610044	0.0761322	0.094009		0.0116794	0.000869248
		105	0.0897474	0.0622156	0.0759815	0.0903473		0.0127722	0.00113196
		105.25	0.0852411	0.0660044	0.0756228	0.0869149		0.0139872	0.0017169
		105.5	0.0730849	0.0989378	0.0860113	0.0845969		0.0122578	0.00221948
		105.75	0.0692661	0.102816	0.0860409	0.0828519		0.0175172	0.0033116
		106	0.0628411	0.107482	0.0851617	0.0811416		0.0231211	0.00493248
		106.25	0.0558536	0.0982267	0.0770402	0.0792268		0.0235917	0.00668605
		106.5	0.0498661	0.0765267	0.0631964	0.0770699		0.0224178	0.00862784
		106.75	0.0552036	0.0585933	0.0568985	0.0754693		0.0202772	0.0101232
		107	0.0586974	0.0378156	0.0482565	0.0735929		0.0168367	0.0112768
		107.25	0.0649599	0.0322267	0.0485933	0.0717118		0.012785	0.0124624
		107.5	0.0631911	0.0216933	0.0424422	0.0700071		0.0115444	0.013146
		107.75	0.0664786	0.00832667	0.0374027	0.0677252		0.0122817	0.0138878
		108	0.0673474	-0.00340667	0.0319704	0.0656325		0.0135522	0.0145695
		108.25	0.0611661	-0.00977333	0.0256964	0.0636618		0.00986722	0.0151688
		108.5	0.0571536	0.01636	0.0367568	0.0623781		0.0141933	0.0155054
		108.75	0.0567411	0.0163711	0.0365561	0.0611552		0.0127083	0.0153759
		109	0.0544786	0.0300378	0.0422582	0.0596309		0.0147567	0.0155569
		109.25	0.0524661	0.0480267	0.0502464	0.0587755		0.0157383	0.0157314
		109.5	0.0667849	0.0415933	0.0541891	0.0583503		0.0205422	0.016117
		109.75	0.0717286	0.0397933	0.055761	0.0579082		0.0222572	0.0167052
		110	0.0716786	0.0373267	0.0545027	0.0574483		0.0232056	0.0170398
		110.25	0.0776224	0.0527711	0.0651968	0.0570397		0.0218872	0.0169672
		110.5	0.0789036	0.0734156	0.0761596	0.0570409		0.0226244	0.0169103
		110.75	0.0791911	0.0552044	0.0671978	0.056659		0.022995	0.0169443
		111	0.0790974	0.05776	0.0684287	0.0563462		0.0204989	0.0169573
		111.25	0.0630099	0.0525156	0.0577627	0.055118		0.0168583	0.0169586
		111.5	0.0729474	0.0521378	0.0625426	0.0540964		0.0151289	0.0170965
		111.75	0.0730849	0.0679044	0.0704947	0.0534587		0.0108217	0.017054
		112	0.0723974	0.0684711	0.0704343	0.0531715		0.00829222	0.0168193
		112.25	0.0728224	0.0852044	0.0790134	0.0538592		0.00694056	0.0164304
		112.5	0.0775724	0.0676378	0.0726051	0.0545421		0.00576667	0.0161892
		112.75	0.0825349	0.0428711	0.062703	0.0551702		0.00372611	0.0155734
		113	0.0873536	0.0444378	0.0658957	0.0559224		0.000285556	0.0148427
		113.25	0.0823786	0.0383489	0.0603638	0.0567016		0.000456111	0.0140015
		113.5	0.0787474	0.0514267	0.065087	0.0579053		0.00482667	0.0133596
		113.75	0.0800349	0.0589156	0.0694752	0.059536		0.00840833	0.0126458
		114	0.0816036	0.03176	0.0566818	0.0608832		0.00923444	0.0118798
		114.25	0.0862724	0.0423156	0.064294	0.0620804		0.00962722	0.0110811
		114.5	0.0845661	0.0237044	0.0541353	0.0628447		0.01082	0.0104301
		114.75	0.0902036	0.0283156	0.0592596	0.0635839		0.00822389	0.00958297
		115	0.0834286	0.0479822	0.0657054	0.0642561		0.00783889	0.00869144
		115.25	0.0925099	0.0450378	0.0687738	0.0648902		0.0119206	0.00818683
		115.5	0.0807286	0.0726711	0.0766999	0.0658006		0.0170689	0.00819922
		115.75	0.0809286	0.0550822	0.0680054	0.0663876		0.0168506	0.00830049
		116	0.0836036	0.0461044	0.064854	0.0663727		0.0124767	0.00839784
		116.25	0.0853286	0.0506711	0.0679999	0.066018		0.0151361	0.00880042
		116.5	0.0829536	0.0476378	0.0652957	0.0659353		0.0177733	0.00943765
		116.75	0.0772286	0.0488933	0.063061	0.0657019		0.0133661	0.00988467
		117	0.0654349	0.0508267	0.0581308	0.0657179		0.0129033	0.0104245
		117.25	0.0716099	0.05026	0.0609349	0.065648		0.0139628	0.0112291
		117.5	0.0702536	0.0705933	0.0704235	0.0656449		0.0145	0.0120552
		117.75	0.0676036	0.0479267	0.0577652	0.0650941		0.0100372	0.0123617
		118	0.0608724	0.0760044	0.0684384	0.0646343		0.00546333	0.0121884
		118.25	0.0539349	0.0802044	0.0670697	0.0643936		0.00843389	0.0121413
		118.5	0.0566786	0.0836156	0.0701471	0.0647173		0.00662667	0.0119648
		118.75	0.0594974	0.08526	0.0723787	0.0649991		0.00620833	0.0116936
		119	0.0635161	0.0750156	0.0692659	0.0653862		0.0112122	0.0118693
		119.25	0.0694661	0.0987711	0.0841186	0.0662136		0.014605	0.0122674
		119.5	0.0807599	0.126249	0.103504	0.0676932		0.0137311	0.0123739
		119.75	0.0811036	0.113904	0.097504	0.0694681		0.013135	0.0121425
		120	0.0855911	0.121271	0.103431	0.0711697		0.0168167	0.0121405
		120.25	0.0914849	0.111838	0.101661	0.073236		0.0172983	0.0124241
		120.5	0.0953286	0.108716	0.102022	0.0750953		0.0190356	0.0126535
		120.75	0.0961286	0.120582	0.108355	0.0769496		0.0199061	0.0127789
		121	0.0971849	0.104804	0.100995	0.0783505		0.0167544	0.0129782
		121.25	0.105879	0.108827	0.107353	0.0796832		0.0156361	0.013139
		121.5	0.108197	0.109993	0.109095	0.0814698		0.0117067	0.0130063
		121.75	0.101297	0.0795378	0.0904176	0.0825812		0.0145883	0.0130115
		122	0.11451	0.0880489	0.101279	0.0840282		0.0167367	0.0134056
		122.25	0.118141	0.0903489	0.104245	0.0857216		0.0157961	0.0140134
		122.5	0.114822	0.07526	0.0950412	0.087112		0.0176	0.0145525
		122.75	0.0979724	0.0628156	0.080394	0.08808		0.0141817	0.014997
		123	0.0951036	0.0712933	0.0831985	0.089048		0.0164856	0.0156015
		123.25	0.0918724	0.0789711	0.0854218	0.0897001		0.0226672	0.0162753
		123.5	0.0942849	0.06426	0.0792724	0.0906352		0.0236711	0.0168086
		123.75	0.0932599	0.0305267	0.0618933	0.0903506		0.0297861	0.017753
		124	0.0888099	0.0233267	0.0560683	0.0898723		0.0294678	0.0187138
		124.25	0.0856036	0.01026	0.0479318	0.0889064		0.0259161	0.0192491
		124.5	0.0891286	0.00183778	0.0454832	0.087737		0.0243644	0.0196647
		124.75	0.10111	0.00282667	0.0519683	0.086985		0.023035	0.0199
		125	0.0991599	0.01396	0.0565599	0.0857868		0.0273278	0.0203365
		125.25	0.0871474	-0.0128733	0.037137	0.0829012		0.0248872	0.0208149
		125.5	0.0869161	-0.0244067	0.0312547	0.0800208		0.0249578	0.0213633
		125.75	0.0951661	-0.00437333	0.0453964	0.0774976		0.0229506	0.0220247
		126	0.0902224	0.00408222	0.0471523	0.0751276		0.0234433	0.0225456
		126.25	0.0949474	0.00244889	0.0486981	0.0728092		0.0240917	0.0229782
		126.5	0.0980411	0.00491556	0.0514784	0.0703363		0.0253511	0.0235403
		126.75	0.111072	0.0154822	0.0632773	0.0686964		0.0251217	0.0239827
		127	0.11446	-0.0104956	0.0519822	0.066289		0.0291589	0.0248637
		127.25	0.118822	-0.00532889	0.0567468	0.064013		0.0308961	0.0257114
		127.5	0.118697	0.00459333	0.0616454	0.062762		0.0327	0.0263016
		127.75	0.12776	0.00450444	0.0661322	0.0612338		0.0280594	0.0265597
		128	0.122854	-0.00927333	0.0567902	0.0591706		0.0295189	0.026544
		128.25	0.127029	-0.0133178	0.0568554	0.0575103		0.0274006	0.0264224
		128.5	0.123685	-0.0127067	0.0554891	0.0564275		0.0290378	0.026606
		128.75	0.112916	-0.0166733	0.0481214	0.0549024		0.0279194	0.0268151
		129	0.106647	-0.0356511	0.0354981	0.0527318		0.0329456	0.0273981
		129.25	0.10181	-0.0237844	0.0390127	0.0509814		0.0345272	0.0278216
		129.5	0.100054	-0.0265844	0.0367346	0.0498876		0.0350422	0.028419
		129.75	0.0956286	-0.0302178	0.0327054	0.0488718		0.0326239	0.0288699
		130	0.0906099	-0.0104844	0.0400627	0.0485296		0.0385167	0.0297856
		130.25	0.0840224	0.00676	0.0453912	0.0485256		0.0364761	0.0305522
		130.5	0.0831911	0.0337822	0.0584867	0.0488091		0.0363133	0.0312711
		130.75	0.0776474	0.0454044	0.0615259	0.049025		0.0389728	0.0320724
		131	0.0725411	0.0689933	0.0707672	0.0504872		0.0412656	0.033022
		131.25	0.0638786	0.0735156	0.0686971	0.0521151		0.0390694	0.033605
		131.5	0.0626099	0.0648267	0.0637183	0.0529117		0.0358511	0.0338965
		131.75	0.0571661	0.0623044	0.0597353	0.0534588		0.0352883	0.0340487
		132	0.0638286	0.0667489	0.0652888	0.0541801		0.0413811	0.0348324
		132.25	0.0712036	0.0504267	0.0608152	0.054586		0.0396517	0.0354284
		132.5	0.0770099	0.0516044	0.0643072	0.0546308		0.0426333	0.0363244
		132.75	0.0729474	0.03316	0.0530537	0.0546774		0.0432372	0.0371597
		133	0.0794599	0.0243378	0.0518988	0.0544666		0.0448522	0.0381558
		133.25	0.0880974	0.0188822	0.0534898	0.054112		0.0424006	0.0387119
		133.5	0.0962661	0.0312489	0.0637575	0.0540088		0.0413711	0.0391145
		133.75	0.10046	0.0533933	0.0769266	0.0548843		0.0416639	0.039504
		134	0.105716	0.0357822	0.0707492	0.0554884		0.0426456	0.0400935
		134.25	0.105729	0.04506	0.0753943	0.0563538		0.0381828	0.0400739
		134.5	0.0966849	0.0450711	0.070878	0.0573432		0.0368756	0.0400974
		134.75	0.0936786	0.0344933	0.064086	0.0585862		0.0377906	0.0401843
		135	0.0967224	0.0455044	0.0711134	0.0599819		0.0377389	0.0401117
		135.25	0.0993974	0.0561267	0.077762	0.0617657		0.0339094	0.039679
		135.5	0.0944411	0.0743044	0.0843728	0.0640121		0.0341467	0.0393894
		135.75	0.0994224	0.0484044	0.0739134	0.0654838		0.0321061	0.0391691
		136	0.0913536	0.0399044	0.065629	0.0663638		0.0328544	0.0390259
		136.25	0.0963099	0.0536933	0.0750016	0.0670818		0.0323361	0.0384939
		136.5	0.0947724	0.0561711	0.0754718	0.0676881		0.0326844	0.0380841
		136.75	0.10071	0.0613156	0.0810127	0.0681336		0.0336439	0.0375553
		137	0.107835	0.05786	0.0828474	0.0687488		0.0290922	0.0367232
		137.25	0.115472	0.0426711	0.0790718	0.0694164		0.0265739	0.035648
		137.5	0.114879	0.0303711	0.0726249	0.0699768		0.0247889	0.034612
		137.75	0.109879	0.0138933	0.061886	0.0698288		0.0299372	0.0339394
		138	0.114791	0.0410933	0.0779422	0.0705735		0.0360189	0.0336074
		138.25	0.117191	0.0420933	0.0796422	0.0712402		0.0362339	0.0332302
		138.5	0.12246	0.0418044	0.0821322	0.0725045		0.0348378	0.0330335
		138.75	0.127779	0.0403822	0.0840804	0.0739037		0.0383528	0.0331204
		139	0.128147	0.0623378	0.0952426	0.0757191		0.0408567	0.0333007
		139.25	0.121279	0.0773711	0.0993249	0.0772655		0.0441606	0.0336785
		139.5	0.126385	0.0842156	0.1053	0.0784991		0.0469311	0.0344444
		139.75	0.123816	0.108938	0.116377	0.0804829		0.0518794	0.0354875
		140	0.129716	0.0758044	0.10276	0.0816727		0.0522944	0.0366751
		140.25	0.118985	0.0737044	0.0963447	0.08278		0.0498317	0.0376738
		140.5	0.116935	0.0855933	0.101264	0.0843964		0.0487578	0.0386397
		140.75	0.120516	0.0833378	0.101927	0.0857361		0.0547283	0.0399364
		141	0.12256	0.0928378	0.107699	0.0870377		0.05121	0.0409697
		141.25	0.118966	0.0757156	0.0973409	0.0876016		0.0484472	0.0421083
		141.5	0.118672	0.0970489	0.107861	0.0890775		0.0482511	0.0433834
		141.75	0.122785	0.0918156	0.1073	0.0908893		0.0494772	0.0448357
		142	0.121291	0.0775489	0.09942	0.091951		0.0475033	0.045869
		142.25	0.117604	0.0957711	0.106687	0.0933082		0.0469628	0.0465127
		142.5	0.128016	0.0988267	0.113421	0.0947173		0.0499444	0.0473192
		142.75	0.125154	0.100249	0.112701	0.0960153		0.0511817	0.0482806
		143	0.125572	0.101693	0.113633	0.0975179		0.04723	0.0488028
		143.25	0.121185	0.0896933	0.105439	0.0989446		0.0472894	0.0491812
		143.5	0.122279	0.0826822	0.10248	0.10071		0.0500156	0.0495256
		143.75	0.115272	0.0556156	0.085444	0.101036		0.0498972	0.0497001
		144	0.12131	0.0470378	0.0841738	0.101233		0.0506344	0.0496269
		144.25	0.129247	0.0261156	0.0776815	0.101039		0.0475717	0.0493491
		144.5	0.134566	0.0341156	0.0843409	0.101051		0.0457089	0.0491065
		144.75	0.139047	0.0292156	0.0841315	0.100568		0.0379794	0.0484725
		145	0.133335	0.0213822	0.0773586	0.0996125		0.0390167	0.0475483
		145.25	0.134054	0.0338267	0.0839402	0.0986838		0.0359206	0.0466489
		145.5	0.12946	0.0361378	0.0827988	0.0972238		0.0397356	0.0461365
		145.75	0.13651	0.0450711	0.0907905	0.0967034		0.0371617	0.0454842
		146	0.127441	0.0591156	0.0932784	0.0965701		0.0402989	0.0449442
		146.25	0.137772	0.0838711	0.110822	0.0969856		0.0358472	0.0442586
		146.5	0.137266	0.0970156	0.117141	0.0976471		0.0392289	0.0438037
		146.75	0.144341	0.0791267	0.111734	0.0978226		0.0409217	0.0432729
		147	0.142204	0.0713489	0.106776	0.0982328		0.0392256	0.0425696
		147.25	0.141685	0.0855489	0.113617	0.0984831		0.0355406	0.041882
		147.5	0.138741	0.0690156	0.103878	0.0983343		0.0398667	0.0414454
		147.75	0.135291	0.06436	0.0998256	0.0983519		0.0390594	0.0408009
		148	0.129091	0.04956	0.0893256	0.0975971		0.0395633	0.040193
		148.25	0.114635	0.0174044	0.0660197	0.0955361		0.0400783	0.0395721
		148.5	0.111629	0.0122711	0.0619499	0.0933295		0.0442156	0.0393746
		148.75	0.105079	0.02846	0.0667693	0.091292		0.0445528	0.0393066
		149	0.109372	0.0527378	0.0810551	0.0902318		0.0464011	0.039802
		149.25	0.101954	0.05056	0.0762568	0.0890917		0.050905	0.0405013
		149.5	0.113804	0.0304378	0.0721207	0.0885124		0.0503978	0.0413529
		149.75	0.103847	0.0484711	0.0761593	0.0881639		0.0504906	0.0419856
		150	0.11626	0.07346	0.0948599	0.0889108		0.0525944	0.0428934
		150.25	0.104716	0.0911044	0.0979103	0.0895008		0.0541983	0.043711
		150.5	0.0979474	0.117182	0.107565	0.0905196		0.0537578	0.0447646
		150.75	0.0944036	0.114771	0.104587	0.0917035		0.0551394	0.0457005
		151	0.10246	0.0946711	0.0985655	0.0923394		0.0542211	0.0464828
		151.25	0.115454	0.0967378	0.106096	0.0933523		0.0503583	0.0471377
		151.5	0.120797	0.107404	0.114101	0.0943658		0.0582289	0.0484723
		151.75	0.126329	0.11176	0.119044	0.095486		0.0666106	0.0500455
		152	0.126972	0.11036	0.118666	0.0958271		0.0589811	0.0512173
		152.25	0.123829	0.0781711	0.101	0.0951253		0.0550183	0.0521264
		152.5	0.121822	0.0730711	0.0974468	0.0945041		0.0519444	0.0528244
		152.75	0.117891	0.0775156	0.0977034	0.0941097		0.0572928	0.0535937
		153	0.119466	0.0609378	0.090202	0.0930916		0.0564967	0.0542963
		153.25	0.127397	0.0666822	0.0970398	0.0927943		0.0603672	0.0551178
		153.5	0.115185	0.0636933	0.0894391	0.0923427		0.0670267	0.0560661
		153.75	0.122522	0.0709378	0.0967301	0.0926646		0.0616306	0.0567269
		154	0.116916	0.0849378	0.100927	0.0941824		0.0575789	0.0571439
		154.25	0.119929	0.0819267	0.100928	0.095877		0.0674161	0.0580157
		154.5	0.123479	0.0776489	0.100564	0.0973464		0.0714978	0.0590333
		154.75	0.12071	0.0809489	0.100829	0.0982061		0.0755572	0.0603157
		155	0.119685	0.0533822	0.0865336	0.0986529		0.0682389	0.0610862
		155.25	0.123379	0.0672711	0.0953249	0.0996618		0.0677761	0.0618836
		155.5	0.125041	0.0774378	0.101239	0.100752		0.0660133	0.0628044
		155.75	0.117616	0.0685044	0.0930603	0.100674		0.0638172	0.0631332
		156	0.12046	0.0597933	0.0901266	0.100336		0.0616989	0.0628442
		156.25	0.134941	0.0497933	0.0923672	0.0996748		0.0645472	0.0631717
		156.5	0.12926	0.0508489	0.0900544	0.0990429		0.0610511	0.0635265
		156.75	0.13466	0.0582378	0.0964488	0.0989509		0.0615106	0.0640892
		157	0.133066	0.0490267	0.0910464	0.0982966		0.0599478	0.0642454
		157.25	0.128279	0.0671822	0.0977304	0.0975848		0.0613961	0.0645336
		157.5	0.128654	0.0649822	0.0968179	0.0966185		0.0655444	0.0648382
		157.75	0.12316	0.0702267	0.0966933	0.0956631		0.0652817	0.0647355
		158	0.132285	0.0646267	0.0984558	0.0955525		0.0630411	0.0648185
		158.25	0.149385	0.0745267	0.111956	0.0961833		0.0663339	0.0653335
		158.5	0.146541	0.0840378	0.115289	0.096948		0.0611378	0.0649642
		158.75	0.140229	0.0895267	0.114878	0.0980208		0.0650861	0.064587
		159	0.141954	0.0877489	0.114851	0.0987952		0.0568789	0.0634883
		159.25	0.139722	0.0798044	0.109763	0.0996789		0.061705	0.063104
		159.5	0.131666	0.0565267	0.0940964	0.0995644		0.0600867	0.0626516
		159.75	0.137891	0.0526267	0.0952589	0.0993179		0.0602906	0.062315
		160	0.129816	0.0244933	0.0771547	0.0982843		0.0624167	0.0622326
		160.25	0.123185	0.01386	0.0685224	0.0968912		0.0631317	0.0623169
		160.5	0.134422	0.00152667	0.0679745	0.0954628		0.0589356	0.0619868
		160.75	0.132535	0.0164156	0.0744752	0.0949385		0.063495	0.0621306
		161	0.129072	0.0118044	0.0704384	0.0938565		0.0615656	0.0621338
		161.25	0.136366	0.00399333	0.0701797	0.0925061		0.0699583	0.0627226
		161.5	0.138704	0.01766	0.0781818	0.0918592		0.0658178	0.0629827
		161.75	0.142554	0.0341711	0.0883624	0.0917825		0.0684217	0.063152
		162	0.128435	0.0364156	0.0824252	0.0913502		0.0667811	0.0632402
		162.25	0.10841	0.03236	0.0703849	0.090495		0.0656072	0.0633911
		162.5	0.112416	0.0526711	0.0825436	0.0898904		0.0614	0.0631009
		162.75	0.124216	0.0263711	0.0752936	0.0892055		0.0653594	0.0633492
		163	0.128754	0.0144489	0.0716013	0.0880695		0.0638411	0.063276
		163.25	0.121035	-0.00406222	0.0584863	0.0864029		0.0587339	0.0633851
		163.5	0.11011	0.0117489	0.0609294	0.0848479		0.0571822	0.0631191
		163.75	0.120672	0.03856	0.0796162	0.0840288		0.0560528	0.0628818
		164	0.130941	0.0479378	0.0894395	0.0830498		0.0603233	0.0628837
		164.25	0.136391	0.03796	0.0871756	0.0818275		0.0578828	0.062617
		164.5	0.142691	0.0295378	0.0861145	0.0805769		0.0569867	0.0622556
		164.75	0.140322	0.0135822	0.0769523	0.0789292		0.0658906	0.0626647
		165	0.146254	0.04816	0.0972068	0.0783832		0.06555	0.0627856
		165.25	0.146004	0.0332711	0.0896374	0.0781893		0.0637428	0.0629136
		165.5	0.135966	0.0358156	0.0858909	0.077782		0.0697356	0.0629005
		165.75	0.127866	0.0381489	0.0830075	0.0780365		0.0706172	0.0631828
		166	0.144254	0.01296	0.0786068	0.078475		0.07331	0.0634704
		166.25	0.140441	0.0178822	0.0791617	0.0789614		0.071225	0.0637318
		166.5	0.135216	0.0367378	0.085977	0.0794614		0.0714178	0.0640736
		166.75	0.140185	0.0605489	0.100367	0.0807627		0.069855	0.0645709
		167	0.116104	0.0730044	0.094554	0.0818224		0.0634144	0.0644565
		167.25	0.123329	0.0662822	0.0948054	0.0825452		0.0662961	0.0646009
		167.5	0.141922	0.0768489	0.109386	0.0834592		0.0692444	0.0652192
		167.75	0.140666	0.0951378	0.117902	0.0850017		0.0639928	0.0656198
		168	0.135635	0.0972933	0.116464	0.0870051		0.0663633	0.0662263
		168.25	0.129872	0.112071	0.120972	0.0886759		0.0674117	0.0666433
		168.5	0.118272	0.112827	0.11555	0.0904262		0.0682267	0.0672518
		168.75	0.121185	0.112549	0.116867	0.0923943		0.0680417	0.0679021
		169	0.11831	0.123716	0.121013	0.0951128		0.06609	0.0679138
		169.25	0.108954	0.113649	0.111301	0.0973029		0.064805	0.06787
		169.5	0.121266	0.117127	0.119196	0.0990238		0.0692644	0.0681948
		169.75	0.122729	0.123249	0.122989	0.100482		0.0676461	0.0680719
		170	0.11246	0.128216	0.120338	0.101924		0.0736056	0.0682476
		170.25	0.129441	0.120093	0.124767	0.103605		0.076165	0.0684156
		170.5	0.132766	0.101927	0.117346	0.105361		0.0744578	0.0686058
		170.75	0.132091	0.0890267	0.110559	0.105942		0.0707172	0.0685645
		171	0.147541	0.0734711	0.110506	0.106849		0.0740433	0.0688109
		171.25	0.144547	0.0643711	0.104459	0.107656		0.0780694	0.069673
		171.5	0.141497	0.0955489	0.118523	0.1092		0.0818956	0.0705906
		171.75	0.140372	0.0957267	0.11805	0.110915		0.0763106	0.0710062
		172	0.146741	0.0679711	0.107356	0.112141		0.0760589	0.071716
		172.25	0.151622	0.0705378	0.11108	0.113233		0.072385	0.0720702
		172.5	0.14751	0.0848711	0.116191	0.113921		0.0659444	0.0719839
		172.75	0.143879	0.0867267	0.115303	0.114823		0.0688261	0.0720192
		173	0.139079	0.0895378	0.114308	0.115671		0.0717744	0.0722388
		173.25	0.139272	0.10166	0.120466	0.116152		0.0665228	0.0722642
		173.5	0.143635	0.0943822	0.119009	0.116201		0.0688933	0.0725047
		173.75	0.150754	0.0715489	0.111151	0.11597		0.0699417	0.0725445
		174	0.151385	0.0677489	0.109567	0.115474		0.0707567	0.0727275
		174.25	0.143122	0.0812378	0.11218	0.115327		0.0705717	0.0725491
		174.5	0.152554	0.08516	0.118857	0.115414		0.06862	0.0721052
		174.75	0.137866	0.0747933	0.10633	0.114775		0.067335	0.0716862
		175	0.137354	0.0644378	0.100896	0.114323		0.0717944	0.0717496
		175.25	0.13181	0.0525822	0.0921961	0.113149		0.0701761	0.0715221
		175.5	0.135704	0.05716	0.0964318	0.111994		0.0761356	0.0714084
		175.75	0.133797	0.0560933	0.0949454	0.11089		0.078695	0.0712201
		176	0.134154	0.05576	0.0949568	0.109594		0.0769878	0.0712599
		176.25	0.136704	0.0667822	0.101743	0.108916		0.0732472	0.0710945
		176.5	0.138872	0.06346	0.101166	0.108507		0.0765733	0.0713409
		176.75	0.146741	0.0363267	0.0915339	0.107683		0.0805994	0.072203
		177	0.14426	0.0271378	0.0856988	0.106867		0.0844256	0.0731206
		177.25	0.143166	0.0315933	0.0873797	0.105513		0.0788406	0.0735362
		177.5	0.13176	0.0324378	0.0820988	0.10395		0.0785889	0.074246
		177.75	0.137066	0.0330044	0.0850353	0.102979		0.074915	0.0746002
		178	0.137147	0.0232044	0.0801759	0.101636		0.0684744	0.0745139
		178.25	0.135679	0.0113933	0.073536	0.099781		0.0713561	0.0745492
		178.5	0.129985	-0.0118067	0.0590891	0.097337		0.0743044	0.0747688
		178.75	0.147766	0.00016	0.0739631	0.0955828		0.0690528	0.0747942
		179	0.149997	0.00981556	0.0799065	0.0938194		0.0714233	0.0750347
		179.25	0.156516	0.0114822	0.0839992	0.0922972		0.0724717	0.0750745
		179.5	0.151122	0.0199044	0.0855134	0.0911825		0.0732867	0.0752575
		179.75	0.154929	0.0206489	0.0877888	0.0902357		0.0731017	0.0750791
		180	0.155422	0.00417111	0.0797968	0.0888277		0.07115	0.0746352
		180.25	0.162972	0.0330711	0.0980218	0.0879218		0.069865	0.0742162
		180.5	0.158354	0.0564489	0.107401	0.0879684		0.0743244	0.0742796
		180.75	0.165397	0.0817933	0.123595	0.0889553		0.0727061	0.0740521
		181	0.171247	0.0644156	0.117831	0.0900699		0.0786656	0.0739384
		181.25	0.187629	0.0718044	0.129717	0.0915171		0.081225	0.0737501
		181.5	0.195741	0.0873378	0.141539	0.0935429		0.0795178	0.0737899
		181.75	0.190004	0.0925711	0.141287	0.0955573		0.0757772	0.0736245
		182	0.196166	0.07886	0.137513	0.0971125		0.0791033	0.0738709
		182.25	0.200241	0.0905822	0.145412	0.0990362		0.0831294	0.074733
		182.5	0.193854	0.07296	0.133407	0.100857		0.0869556	0.0756506
		182.75	0.187454	0.0611822	0.124318	0.102536		0.0813706	0.0760662
		183	0.196341	0.0320822	0.114212	0.103702		0.0811189	0.076776
		183.25	0.197841	0.0269378	0.112389	0.105019		0.077445	0.0771302
		183.5	0.19621	0.0279489	0.112079	0.106195		0.0710044	0.0770439
		183.75	0.194429	0.00189333	0.098161	0.106977		0.0738861	0.0770792
		184	0.195466	0.00118222	0.0983242	0.108055		0.0768344	0.0772988
		184.25	0.185154	0.0221711	0.103662	0.109993		0.0715828	0.0773242
		184.5	0.191691	0.0169822	0.104337	0.111314		0.0739533	0.0775647
		184.75	0.188485	0.0268044	0.107645	0.11252		0.0750017	0.0776045
		185	0.192354	0.0178267	0.10509	0.113437
		185.25	0.18216	0.0571933	0.119677	0.114922
		185.5	0.177654	0.0732267	0.12544	0.116559
		185.75	0.178229	0.0799267	0.129078	0.118702
		186	0.17471	0.109393	0.142052	0.120616
		186.25	0.172185	0.122104	0.147145	0.122344
		186.5	0.172566	0.123927	0.148246	0.123416
		186.75	0.169329	0.115571	0.14245	0.124486
		187	0.156904	0.116949	0.136926	0.1248
		187.25	0.154191	0.139035	0.146613	0.12502
		187.5	0.155804	0.115466	0.135635	0.124774
		187.75	0.160122	0.121309	0.140716	0.124914
		188	0.153885	0.0994239	0.126654	0.124098
		188.25	0.156535	0.0771822	0.116859	0.123379
		188.5	0.164866	0.0114489	0.0881575	0.121806
		188.75	0.145072	-0.0307511	0.0571606	0.119326
		189	0.140954	-26.7579	-13.3084	-0.464189
		189.25	0.149404	-26.7579	-13.3042	-1.04751
		189.5	0.148866	-26.7579	-13.3045	-1.63023
		189.75	0.14541	-26.7579	-13.3062	-2.21304
		190	0.148497	-26.7579	-13.3047	-2.79601
		190.25	0.153722	-26.7579	-13.3021	-3.37889
		190.5	0.159291	-26.7579	-13.2993	-3.9618
		190.75	0.15916	-26.7579	-13.2993	-4.54461
		191	0.16881	-26.7579	-13.2945	-5.12783
		191.25	0.166054	-26.7579	-13.2959	-5.71137
		191.5	0.169504	-26.7579	-13.2942	-6.29499
		191.75	0.168972	-26.7579	-13.2944	-6.87918
		192	0.176266	-26.7579	-13.2908	-7.46344
		192.25	0.183604	-26.7579	-13.2871	-8.04759
		192.5	0.171766	-26.7579	-13.293	-8.63174
		192.75	0.187979	-26.7579	-13.2849	-9.2153
		193	0.194622	-26.7579	-13.2816	-9.79914
		193.25	0.195004	-26.7579	-13.2814	-10.3825
		193.5	0.198716	-26.7579	-13.2796	-10.966
		193.75	0.201322	-26.7579	-13.2783	-11.5488
		194	0.201529	-26.7579	-13.2782	-12.1312
		194.25	0.203816	-26.7579	-13.277	-12.7123
		194.5	0.204522	-26.7579	-13.2767	-13.292
		194.75	0.215904	-26.7579	-13.271	-13.2904
		195	0.208291	-26.7579	-13.2748	-13.2891
		195.25	0.213422	-26.7579	-13.2722	-13.2877
		195.5	0.210954	-26.7579	-13.2734	-13.2863
		195.75	0.197429	-26.7579	-13.2802	-13.2852
		196	0.195679	-26.7579	-13.2811	-13.2843
		196.25	0.187629	-26.7579	-13.2851	-13.2837
		196.5	0.197885	-26.7579	-13.28	-13.2828
		196.75	0.189816	-26.7579	-13.284	-13.2824
		197	0.18246	-26.7579	-13.2877	-13.282
		197.25	0.181954	-26.7579	-13.2879	-13.2818
		197.5	0.179335	-26.7579	-13.2893	-13.2815
		197.75	0.176335	-26.7579	-13.2908	-13.2815
		198	0.180722	-26.7579	-13.2886	-13.2816
		198.25	0.174016	-26.7579	-13.2919	-13.2815
		198.5	0.171635	-26.7579	-13.2931	-13.2819
		198.75	0.156591	-26.7579	-13.3006	-13.2827
		199	0.15246	-26.7579	-13.3027	-13.2837
		199.25	0.14681	-26.7579	-13.3055	-13.2848
		199.5	0.146241	-26.7579	-13.3058	-13.286
		199.75	0.15436	-26.7579	-13.3017	-13.287
		200	0.154554	-26.7579	-13.3016	-13.2881
		200.25	0.144985	-26.7579	-13.3064	-13.2894
		200.5	0.13616	-26.7579	-13.3108	-13.2911
		200.75	0.141747	-26.7579	-13.3081	-13.2926
		201	0.141904	-26.7579	-13.308	-13.2941
		201.25	0.132297	-26.7579	-13.3128	-13.2958
		201.5	0.12716	-26.7579	-13.3153	-13.2973
		201.75	0.127735	-26.7579	-13.3151	-13.2988
		202	0.119835	-26.7579	-13.319	-13.3003
		202.25	0.124485	-26.7579	-13.3167	-13.3019
		202.5	0.126822	-26.7579	-13.3155	-13.3033
		202.75	0.131941	-26.7579	-13.313	-13.3044
		203	0.139072	-26.7579	-13.3094	-13.3053
		203.25	0.151472	-26.7579	-13.3032	-13.3059
		203.5	0.157916	-26.7579	-13.3	-13.3063
		203.75	0.158629	-26.7579	-13.2996	-13.3068
		204	0.150266	-26.7579	-13.3038	-13.3073
		204.25	0.163035	-26.7579	-13.2974	-13.3075
		204.5	0.160441	-26.7579	-13.2987	-13.3074
		204.75	0.16596	-26.7579	-13.2959	-13.3071
		205	0.161222	-26.7579	-13.2983	-13.3068
		205.25	0.168722	-26.7579	-13.2946	-13.3063
		205.5	0.183285	-26.7579	-13.2873	-13.3057
		205.75	0.181285	-26.7579	-13.2883	-13.3051
		206	0.180335	-26.7579	-13.2888	-13.3043
		206.25	0.175016	-26.7579	-13.2914	-13.3035
		206.5	0.17171	-26.7579	-13.2931	-13.3028
		206.75	0.175191	-26.7579	-13.2913	-13.3021
		207	0.175835	-26.7579	-13.291	-13.3012
		207.25	0.168135	-26.7579	-13.2949	-13.3003
		207.5	0.167547	-26.7579	-13.2952	-13.2994
		207.75	0.157785	-26.7579	-13.3	-13.2986
		208	0.162191	-26.7579	-13.2978	-13.2978
		208.25	0.156379	-26.7579	-13.3007	-13.2971
		208.5	0.173566	-26.7579	-13.2921	-13.2962
		208.75	1.74439	-26.7579	-12.5067	-13.2613
		209	1.74842	-26.7579	-12.5047	-13.2266
		209.25	1.74378	-26.7579	-12.507	-13.1921
		209.5	1.76397	-26.7579	-12.4969	-13.1572
		209.75	1.75743	-26.7579	-12.5002	-13.1223
		210	1.76881	-26.7579	-12.4945	-13.0874
		210.25	1.75578	-26.7579	-12.501	-13.0527
		210.5	1.76778	-26.7579	-12.495	-13.0179
		210.75	1.75076	-26.7579	-12.5035	-12.9833
		211	1.74738	-26.7579	-12.5052	-12.949
		211.25	1.73374	-26.7579	-12.5121	-12.9153
		211.5
		211.75
		212
		212.25
		212.5
		212.75
		213
		213.25
		213.5
		213.75
		214
		214.25
		214.5
		214.75
		215
		215.25
		215.5
		215.75
		216
		216.25
		216.5
		216.75
		217
		217.25
		217.5
		217.75
		218
		218.25
		218.5
		218.75
		219
		219.25
		219.5
		219.75
		220
		220.25
		220.5
		220.75
		221
		221.25
		221.5
		221.75
		222
		222.25
		222.5
		222.75
		223
		223.25
		223.5
		223.75
		224
		224.25
		224.5
		224.75
		225
		225.25
		225.5
		225.75
		226
		226.25
		226.5
		226.75
		227
		227.25
		227.5
		227.75
		228
		228.25
		228.5
		228.75
		229
