# Supplementary material for: Fluidics system for resolving concentration-dependent effects of dissolved gases on tissue metabolism
Source: eLife journal article supplement (doi:10.7554/elife.66716), 2021-11-02
Supplement: supp [file elife_poa_e66716_Figure_6_source_data_1.xlsx]

## Sheet: Fig. 6A
												Normalized								H2S Concentration Profile
	Time, hours	Time, hrs	9/29/2020, CH1	9/29/2020, CH2	9/20	Average	SE			9/17/2020, CH3	9/17/2020, CH4	9/17/2020, CH3	9/17/2020, CH4	Average	SE		ttest		Time, min	Time, Hours	92920, CH1	92920, CH2	91720, Ch2	H2S, uM
	-0.25	-3.25	0.0203998	0.0211158	0.0395087	0.0270081	0.00625372		-0.25	0.215	0.219	0.0464865	0.0403142	0.0434003	0.00308616				60	1	0	0	0	0
	-0.166667	-3.16667	0.0253154	0.0231162	0.0395087	0.0293135	0.005137		-0.166667	0.142	0.207	0.0307027	0.0381052	0.0344039	0.00370124				61	1.01667	0.00978333	0.0170667	0.0170667	0.0146389
	-0.0833333	-3.08333	0.0410454	0.0175595	0.0481064	0.0355704	0.00923329		-0.0833333	0.223	0.27	0.0482162	0.0497024	0.0489593	0.000743091				62	1.03333	0.0195667	0.0341333	0.0341333	0.0292778
	0	-3	0.0390791	0.036008	0.0429887	0.0393586	0.00202001		0	0.215	0.215	0.0464865	0.0395778	0.0430322	0.00345433				63	1.05	0.02935	0.0512	0.0512	0.0439167
	0.166667	-2.83333	0.437244	0.231162	0.138178	0.268862	0.0883667		0.166667	0.859	0.817	0.18573	0.150396	0.168063	0.017667				64	1.06667	0.0391333	0.0682667	0.0682667	0.0585556
	0.333333	-2.66667	0.648124	0.524116	0.42129	0.531177	0.0655765		0.333333	1.734	2.11	0.374919	0.388415	0.381667	0.00674806				65	1.08333	0.0489167	0.0853333	0.0853333	0.0731944
	0.5	-2.5	0.971326	0.725717	0.739816	0.812286	0.0796238		0.5	3.756	3.74	0.812108	0.68847	0.750289	0.0618189				66	1.1	0.0587	0.1024	0.1024	0.0878333
	0.666667	-2.33333	0.955841	0.99022	0.989355	0.978472	0.0113182		0.666667	4.599	5.225	0.994378	0.961833	0.978106	0.0162725				67	1.11667	0.0684833	0.119467	0.119467	0.102472
	0.833333	-2.16667	1.00746	0.967993	1.00061	0.992021	0.0121752		0.833333	4.619	5.334	0.998703	0.981899	0.990301	0.0084021		0.462718		68	1.13333	0.0782667	0.136533	0.136533	0.117111
	1	-2	1.0367	1.04179	1.01003	1.02951	0.00984811		1	4.563	5.448	0.986595	1.00288	0.994739	0.00814469		0.0451222		69	1.15	0.08805	0.1536	0.1536	0.13175
	1.16667	-1.83333	1.0603	1.00778	1.00061	1.0229	0.0188145		1.5	4.66	5.409	1.00757	0.995705	1.00164	0.00593142		0.226236		70	1.16667	0.0978333	0.170667	0.170667	0.146389
	1.33333	-1.66667	1.02982	1.01045	1.01269	1.01765	0.00611844		2	4.652	5.44	1.00584	1.00141	1.00362	0.00221327		0.0902512		71	1.18333	0.107617	0.187733	0.187733	0.161028
	1.5	-1.5	1.02319	1.08046	0.992016	1.03189	0.0259003		2.08333	4.133	5.557	0.893622	1.02295	0.958285	0.0646637		0.149216		72	1.2	0.1174	0.2048	0.2048	0.175667
	1.66667	-1.33333	1.07087	1.06935	1.02027	1.05349	0.0166197		2.16667	4.725	5.479	1.02162	1.00859	1.01511	0.00651554		0.0896632		73	1.21667	0.127183	0.221867	0.221867	0.190306
	1.83333	-1.16667	1.06497	1.11358	1.03501	1.07118	0.0228948		2.25	4.473	5.713	0.967135	1.05167	1.0094	0.0422654		0.124003		74	1.23333	0.136967	0.238933	0.238933	0.204944
	2	-1	1.11584	1.26828	1.04442	1.14285	0.0660184		2.41667	4.676	5.608	1.01103	1.03234	1.02168	0.0106551		0.125934		75	1.25	0.14675	0.256	0.256	0.219583
	2.16667	-0.833333	0.986072	1.28317	1.10788	1.12571	0.0862278		2.58333	4.538	5.456	0.981189	1.00436	0.992773	0.0115837		0.159715		76	1.26667	0.156533	0.273067	0.273067	0.234222
	2.33333	-0.666667	0.994675	1.28117	1.17298	1.14961	0.0835264		2.75	4.676	5.628	1.01103	1.03602	1.02352	0.0124959		0.164126		77	1.28333	0.166317	0.290133	0.290133	0.248861
	2.5	-0.5	1.1129	1.30051	1.20491	1.20611	0.0541633		2.91667	4.623	5.424	0.999568	0.998466	0.999017	0.000550796		0.0297346		78	1.3	0.1761	0.3072	0.3072	0.2635
	2.66667	-0.333333	1.18024	1.3623	1.19202	1.24485	0.0588233		3.08333	4.571	5.198	0.988324	0.956863	0.972594	0.0157305		0.0191384		79	1.31667	0.185883	0.324267	0.324267	0.278139
	2.83333	-0.166667	1.34049	1.32629	1.22968	1.29882	0.0348116		3.25	4.66	5.342	1.00757	0.983371	0.995469	0.0120982		0.00351287		80	1.33333	0.195667	0.341333	0.341333	0.292778
	3	0	1.33852	1.3134	1.2262	1.29271	0.0340347		3.41667	4.255	5.217	0.92	0.960361	0.94018	0.0201804		0.00237191		81	1.35	0.20545	0.3584	0.3584	0.307417
	3.33333	0.333333	1.32279	1.36497	1.23992	1.30923	0.036731		3.58333	4.473	5.436	0.967135	1.00067	0.983905	0.0167699		0.00348901		82	1.36667	0.215233	0.375467	0.375467	0.322056
	3.66667	0.666667	1.29354	1.39275	1.22027	1.30219	0.0499802		3.75	4.607	5.147	0.996108	0.947475	0.971792	0.0243166		0.00800034		83	1.38333	0.225017	0.392533	0.392533	0.336694
	4	1	1.2729	1.34852	1.19632	1.27258	0.0439386		3.91667	4.356	5.44	0.941838	1.00141	0.971625	0.0297867		0.00795228		84	1.4	0.2348	0.4096	0.4096	0.351333
	4.33333	1.33333	1.21145	1.3283	1.17728	1.23901	0.0457204		4.08333	4.599	5.549	0.994378	1.02148	1.00793	0.013549		0.0153777		85	1.41667	0.244583	0.426667	0.426667	0.365972
	4.66667	1.66667	1.14411	1.36052	1.23746	1.24737	0.0626696		4.25	4.518	5.424	0.976865	0.998466	0.987665	0.0108006		0.0247772		86	1.43333	0.254367	0.443733	0.443733	0.380611
	5	2	1.1129	1.26828	1.26653	1.2159	0.0515061		4.58333	4.652	5.62	1.00584	1.03455	1.02019	0.0143542		0.0311016		87	1.45	0.26415	0.4608	0.4608	0.39525
	5.08333	2.08333	0.923644	1.06668	1.0915	1.02728	0.0523095		4.91667	4.563	5.463	0.986595	1.00565	0.99612	0.00952531		0.338775		88	1.46667	0.273933	0.469333	0.477867	0.407044
	5.58333	2.58333	0.924381	1.09802	0.945752	0.989385	0.0546675		5.25	4.607	5.6	0.996108	1.03086	1.01349	0.0173782		0.379539		89	1.48333	0.283717	0.469333	0.494933	0.415994
	6.08333	3.08333	0.723333	0.95599	0.870215	0.849846	0.0679302		5.58333	4.619	5.538	0.998703	1.01945	1.00908	0.0103744		0.0841073		90	1.5	0.2935	0.469333	0.512	0.424944
	6.58333	3.58333	0.961494	0.844632	0.850358	0.885495	0.0380357		5.91667	4.733	5.393	1.02335	0.992759	1.00806	0.015296		0.0466119		91	1.51667	0.303283	0.469333	0.512	0.428206
																			92	1.53333	0.313067	0.469333	0.512	0.431467
																			93	1.55	0.32285	0.469333	0.512	0.434728
																			94	1.56667	0.332633	0.469333	0.512	0.437989
																			95	1.58333	0.342417	0.469333	0.512	0.44125
																			96	1.6	0.3522	0.469333	0.512	0.444511
																			97	1.61667	0.361983	0.469333	0.512	0.447772
																			98	1.63333	0.371767	0.469333	0.512	0.451033
																			99	1.65	0.38155	0.469333	0.512	0.454294
																			100	1.66667	0.391333	0.469333	0.512	0.457556
																			101	1.68333	0.401117	0.469333	0.512	0.460817
																			102	1.7	0.4109	0.469333	0.512	0.464078
																			103	1.71667	0.420683	0.469333	0.512	0.467339
																			104	1.73333	0.430467	0.469333	0.512	0.4706
																			105	1.75	0.44025	0.469333	0.512	0.473861
																			106	1.76667	0.44025	0.469333	0.512	0.473861
																			107	1.78333	0.44025	0.469333	0.512	0.473861
																			108	1.8	0.44025	0.469333	0.512	0.473861
																			109	1.81667	0.44025	0.469333	0.512	0.473861
																			110	1.83333	0.44025	0.469333	0.512	0.473861
																			111	1.85	0.44025	0.469333	0.512	0.473861
																			112	1.86667	0.44025	0.469333	0.512	0.473861
																			113	1.88333	0.44025	0.469333	0.512	0.473861
																			114	1.9	0.44025	0.469333	0.512	0.473861
																			115	1.91667	0.44025	0.469333	0.512	0.473861
																			116	1.93333	0.44025	0.469333	0.512	0.473861
																			117	1.95	0.44025	0.469333	0.512	0.473861
																			118	1.96667	0.44025	0.469333	0.512	0.473861
																			119	1.98333	0.44025	0.469333	0.512	0.473861
																			120	2	0.44025	0.469333	0.512	0.473861
																			121	2.01667	0.44025	0.469333	0.512	0.473861
																			122	2.03333	0.44025	0.469333	0.512	0.473861
																			123	2.05	0.44025	0.469333	0.512	0.473861
																			124	2.06667	0.44025	0.469333	0.512	0.473861
																			125	2.08333	0.44025	0.469333	0.512	0.473861
																			126	2.1	0.44025	0.469333	0.512	0.473861
																			127	2.11667	0.44025	0.469333	0.512	0.473861
																			128	2.13333	0.44025	0.469333	0.512	0.473861
																			129	2.15	0.44025	0.469333	0.512	0.473861
																			130	2.16667	0.44025	0.469333	0.512	0.473861
																			131	2.18333	0.44025	0.469333	0.512	0.473861
																			132	2.2	0.44025	0.469333	0.512	0.473861
																			133	2.21667	0.44025	0.469333	0.512	0.473861
																			134	2.23333	0.44025	0.469333	0.512	0.473861
																			135	2.25	0.44025	0.469333	0.512	0.473861
																			136	2.26667	0.44025	0.469333	0.512	0.473861
																			137	2.28333	0.44025	0.469333	0.512	0.473861
																			138	2.3	0.44025	0.469333	0.512	0.473861
																			139	2.31667	0.44025	0.469333	0.512	0.473861
																			140	2.33333	0.44025	0.469333	0.512	0.473861
																			141	2.35	0.44025	0.469333	0.512	0.473861
																			142	2.36667	0.44025	0.469333	0.512	0.473861
																			143	2.38333	0.44025	0.469333	0.512	0.473861
																			144	2.4	0.44025	0.469333	0.512	0.473861
																			145	2.41667	0.44025	0.469333	0.512	0.473861
																			146	2.43333	0.44025	0.469333	0.512	0.473861
																			147	2.45	0.44025	0.469333	0.512	0.473861
																			148	2.46667	0.44025	0.469333	0.512	0.473861
																			149	2.48333	0.44025	0.469333	0.512	0.473861
																			150	2.5	0.44025	0.469333	0.512	0.473861
																			151	2.51667	0.44025	0.469333	0.512	0.473861
																			152	2.53333	0.44025	0.469333	0.512	0.473861
																			153	2.55	0.44025	0.469333	0.512	0.473861
																			154	2.56667	0.44025	0.469333	0.512	0.473861
																			155	2.58333	0.44025	0.469333	0.512	0.473861
																			156	2.6	0.44025	0.469333	0.512	0.473861
																			157	2.61667	0.44025	0.469333	0.512	0.473861
																			158	2.63333	0.44025	0.469333	0.512	0.473861
																			159	2.65	0.44025	0.469333	0.512	0.473861
																			160	2.66667	0.44025	0.469333	0.512	0.473861
																			161	2.68333	0.44025	0.469333	0.512	0.473861
																			162	2.7	0.44025	0.469333	0.512	0.473861
																			163	2.71667	0.44025	0.469333	0.512	0.473861
																			164	2.73333	0.44025	0.469333	0.512	0.473861
																			165	2.75	0.44025	0.469333	0.512	0.473861
																			166	2.76667	0.44025	0.469333	0.512	0.473861
																			167	2.78333	0.44025	0.469333	0.512	0.473861
																			168	2.8	0.44025	0.469333	0.512	0.473861
																			169	2.81667	0.44025	0.469333	0.512	0.473861
																			170	2.83333	0.44025	0.469333	0.512	0.473861
																			171	2.85	0.44025	0.469333	0.512	0.473861
																			172	2.86667	0.44025	0.469333	0.512	0.473861
																			173	2.88333	0.44025	0.469333	0.512	0.473861
																			174	2.9	0.44025	0.469333	0.512	0.473861
																			175	2.91667	0.44025	0.469333	0.512	0.473861
																			176	2.93333	0.44025	0.469333	0.512	0.473861
																			177	2.95	0.44025	0.469333	0.512	0.473861
																			178	2.96667	0.44025	0.469333	0.512	0.473861
																			179	2.98333	0.44025	0.469333	0.512	0.473861
																			180	3	0.44025	0.469333	0.512	0.473861
																			181	3.01667	0.44025	0.469333	0.512	0.473861
																			182	3.03333	0.44025	0.469333	0.512	0.473861
																			183	3.05	0.44025	0.469333	0.512	0.473861
																			184	3.06667	0.44025	0.469333	0.512	0.473861
																			185	3.08333	0.44025	0.469333	0.512	0.473861
																			186	3.1	0.44025	0.469333	0.512	0.473861
																			187	3.11667	0.44025	0.469333	0.512	0.473861
																			188	3.13333	0.44025	0.469333	0.512	0.473861
																			189	3.15	0.44025	0.469333	0.512	0.473861
																			190	3.16667	0.44025	0.469333	0.512	0.473861
																			191	3.18333	0.44025	0.469333	0.512	0.473861
																			192	3.2	0.44025	0.469333	0.512	0.473861
																			193	3.21667	0.44025	0.469333	0.512	0.473861
																			194	3.23333	0.44025	0.469333	0.512	0.473861
																			195	3.25	0.44025	0.469333	0.512	0.473861
																			196	3.26667	0.44025	0.469333	0.512	0.473861
																			197	3.28333	0.44025	0.469333	0.512	0.473861
																			198	3.3	0.44025	0.469333	0.512	0.473861
																			199	3.31667	0.44025	0.469333	0.512	0.473861
																			200	3.33333	0.44025	0.469333	0.512	0.473861
																			201	3.35	0.44025	0.469333	0.512	0.473861
																			202	3.36667	0.44025	0.469333	0.512	0.473861
																			203	3.38333	0.44025	0.469333	0.512	0.473861
																			204	3.4	0.44025	0.469333	0.512	0.473861
																			205	3.41667	0.44025	0.469333	0.512	0.473861
																			206	3.43333	0.44025	0.469333	0.512	0.473861
																			207	3.45	0.44025	0.469333	0.512	0.473861
																			208	3.46667	0.44025	0.469333	0.512	0.473861
																			209	3.48333	0.44025	0.469333	0.512	0.473861
																			210	3.5	0.44025	0.469333	0.512	0.473861
																			211	3.51667	0.44025	0.469333	0.512	0.473861
																			212	3.53333	0.44025	0.469333	0.512	0.473861
																			213	3.55	0.44025	0.469333	0.512	0.473861
																			214	3.56667	0.44025	0.469333	0.512	0.473861
																			215	3.58333	0.44025	0.469333	0.512	0.473861
																			216	3.6	0.44025	0.469333	0.512	0.473861
																			217	3.61667	0.44025	0.469333	0.512	0.473861
																			218	3.63333	0.44025	0.469333	0.512	0.473861
																			219	3.65	0.44025	0.469333	0.512	0.473861
																			220	3.66667	0.44025	0.469333	0.512	0.473861
																			221	3.68333	0.44025	0.469333	0.512	0.473861
																			222	3.7	0.44025	0.469333	0.512	0.473861
																			223	3.71667	0.44025	0.469333	0.512	0.473861
																			224	3.73333	0.44025	0.469333	0.512	0.473861
																			225	3.75	0.44025	0.469333	0.512	0.473861
																			226	3.76667	0.44025	0.469333	0.512	0.473861
																			227	3.78333	0.44025	0.469333	0.512	0.473861
																			228	3.8	0.44025	0.469333	0.512	0.473861
																			229	3.81667	0.44025	0.469333	0.512	0.473861
																			230	3.83333	0.44025	0.469333	0.512	0.473861
																			231	3.85	0.44025	0.469333	0.512	0.473861
																			232	3.86667	0.44025	0.469333	0.512	0.473861
																			233	3.88333	0.44025	0.469333	0.512	0.473861
																			234	3.9	0.44025	0.469333	0.512	0.473861
																			235	3.91667	0.44025	0.469333	0.512	0.473861
																			236	3.93333	0.44025	0.469333	0.512	0.473861
																			237	3.95	0.44025	0.469333	0.512	0.473861
																			238	3.96667	0.44025	0.469333	0.512	0.473861
																			239	3.98333	0.44025	0.469333	0.512	0.473861
																			240	4	0.44025	0.469333	0.512	0.473861
																			241	4.01667	0.44025	0.469333	0.512	0.473861
																			242	4.03333	0.44025	0.469333	0.512	0.473861
																			243	4.05	0.44025	0.469333	0.512	0.473861
																			244	4.06667	0.44025	0.469333	0.512	0.473861
																			245	4.08333	0.44025	0.469333	0.512	0.473861
																			246	4.1	0.44025	0.469333	0.512	0.473861
																			247	4.11667	0.44025	0.469333	0.512	0.473861
																			248	4.13333	0.44025	0.469333	0.512	0.473861
																			249	4.15	0.44025	0.469333	0.512	0.473861
																			250	4.16667	0.44025	0.469333	0.512	0.473861
																			251	4.18333	0.44025	0.469333	0.512	0.473861
																			252	4.2	0.44025	0.469333	0.512	0.473861
																			253	4.21667	0.44025	0.469333	0.512	0.473861
																			254	4.23333	0.44025	0.469333	0.512	0.473861
																			255	4.25	0.44025	0.469333	0.512	0.473861
																			256	4.26667	0.44025	0.469333	0.512	0.473861
																			257	4.28333	0.44025	0.469333	0.512	0.473861
																			258	4.3	0.44025	0.469333	0.512	0.473861
																			259	4.31667	0.44025	0.469333	0.512	0.473861
																			260	4.33333	0.44025	0.469333	0.512	0.473861
																			261	4.35	0.44025	0.469333	0.512	0.473861
																			262	4.36667	0.44025	0.469333	0.512	0.473861
																			263	4.38333	0.44025	0.469333	0.512	0.473861
																			264	4.4	0.44025	0.469333	0.512	0.473861
																			265	4.41667	0.44025	0.469333	0.512	0.473861
																			266	4.43333	0.44025	0.469333	0.512	0.473861
																			267	4.45	0.44025	0.469333	0.512	0.473861
																			268	4.46667	0.44025	0.469333	0.512	0.473861
																			269	4.48333	0.44025	0.469333	0.512	0.473861
																			270	4.5	0.44025	0.469333	0.512	0.473861
																			271	4.51667	0.44025	0.469333	0.512	0.473861
																			272	4.53333	0.44025	0.469333	0.512	0.473861
																			273	4.55	0.44025	0.469333	0.512	0.473861
																			274	4.56667	0.44025	0.469333	0.512	0.473861
																			275	4.58333	0.44025	0.469333	0.512	0.473861
																			276	4.6	0.44025	0.469333	0.512	0.473861
																			277	4.61667	0.44025	0.469333	0.512	0.473861
																			278	4.63333	0.44025	0.469333	0.512	0.473861
																			279	4.65	0.44025	0.469333	0.512	0.473861
																			280	4.66667	0.44025	0.469333	0.512	0.473861
																			281	4.68333	0.44025	0.469333	0.512	0.473861
																			282	4.7	0.44025	0.469333	0.512	0.473861
																			283	4.71667	0.44025	0.469333	0.512	0.473861
																			284	4.73333	0.44025	0.469333	0.512	0.473861
																			285	4.75	0.44025	0.469333	0.512	0.473861
																			286	4.76667	0.44025	0.469333	0.512	0.473861
																			287	4.78333	0.44025	0.469333	0.512	0.473861
																			288	4.8	0.44025	0.469333	0.512	0.473861
																			289	4.81667	0.44025	0.469333	0.512	0.473861
																			290	4.83333	0.44025	0.469333	0.512	0.473861
																			291	4.85	0.44025	0.469333	0.512	0.473861
																			292	4.86667	0.44025	0.469333	0.512	0.473861
																			293	4.88333	0.44025	0.469333	0.512	0.473861
																			294	4.9	0.44025	0.469333	0.512	0.473861
																			295	4.91667	0.44025	0.469333	0.512	0.473861
																			296	4.93333	0.44025	0.469333	0.512	0.473861
																			297	4.95	0.44025	0.469333	0.512	0.473861
																			298	4.96667	0.44025	0.469333	0.512	0.473861
																			299	4.98333	0.44025	0.469333	0.512	0.473861
																			300	5	0.44025	0.469333	0.512	0.473861
																			301	5.01667	0.220125	0.469333	0.256	0.315153
																			302	5.03333	0.110062	0.234667	0.128	0.157576
																			303	5.05	0.0550312	0.117333	0.064	0.0787882
																			304	5.06667	0.0275156	0.0586667	0.032	0.0393941
																			305	5.08333	0.0137578	0.0293333	0.016	0.019697
																			306	5.1	0.00687891	0.0146667	0.008	0.00984852
																			307	5.11667	0.00343945	0.00733333	0.004	0.00492426
																			308	5.13333	0.00171973	0.00366667	0.002	0.00246213
																			309	5.15	0.000859863	0.00183333	0.001	0.00123107
																			310	5.16667	0.000429932	0.000916667	0.0005	0.000615533
																			311	5.18333	0.000214966	0.000458333	0.00025	0.000307766
																			312	5.2	0.000107483	0.000229167	0.000125	0.000153883
																			313	5.21667	5.37415e-05	0.000114583	6.25e-05	7.69416e-05
																			314	5.23333	2.68707e-05	5.72917e-05	3.125e-05	3.84708e-05
																			315	5.25	1.34354e-05	2.86458e-05	1.5625e-05	1.92354e-05
																			316	5.26667	6.71768e-06	1.43229e-05	7.8125e-06	9.6177e-06
																			317	5.28333	3.35884e-06	7.16146e-06	3.90625e-06	4.80885e-06
																			318	5.3	1.67942e-06	3.58073e-06	1.95313e-06	2.40442e-06
																			319	5.31667	8.3971e-07	1.79036e-06	9.76563e-07	1.20221e-06
																			320	5.33333	4.19855e-07	8.95182e-07	4.88281e-07	6.01106e-07
																			321	5.35	2.09928e-07	4.47591e-07	2.44141e-07	3.00553e-07
																			322	5.36667	1.04964e-07	2.23796e-07	1.2207e-07	1.50277e-07
																			323	5.38333	5.24819e-08	1.11898e-07	6.10352e-08	7.51383e-08
																			324	5.4	2.62409e-08	5.59489e-08	3.05176e-08	3.75691e-08
																			325	5.41667	1.31205e-08	2.79744e-08	1.52588e-08	1.87846e-08
																			326	5.43333	6.56024e-09	1.39872e-08	7.62939e-09	9.39228e-09
																			327	5.45	3.28012e-09	6.99361e-09	3.8147e-09	4.69614e-09
																			328	5.46667	1.64006e-09	3.49681e-09	1.90735e-09	2.34807e-09
																			329	5.48333	8.2003e-10	1.7484e-09	9.53674e-10	1.17404e-09
																			330	5.5	4.10015e-10	8.74201e-10	4.76837e-10	5.87018e-10
																			331	5.51667	2.05007e-10	4.37101e-10	2.38419e-10	2.93509e-10
																			332	5.53333	1.02504e-10	2.1855e-10	1.19209e-10	1.46754e-10
																			333	5.55	5.12518e-11	1.09275e-10	5.96046e-11	7.33772e-11
																			334	5.56667	2.56259e-11	5.46376e-11	2.98023e-11	3.66886e-11
																			335	5.58333	1.2813e-11	2.73188e-11	1.49012e-11	1.83443e-11
																			336	5.6	6.40648e-12	1.36594e-11	7.45058e-12	9.17215e-12
																			337	5.61667	3.20324e-12	6.8297e-12	3.72529e-12	4.58608e-12
																			338	5.63333	1.60162e-12	3.41485e-12	1.86265e-12	2.29304e-12
																			339	5.65	8.0081e-13	1.70742e-12	9.31323e-13	1.14652e-12
																			340	5.66667	4.00405e-13	8.53712e-13	4.65661e-13	5.7326e-13
																			341	5.68333	2.00203e-13	4.26856e-13	2.32831e-13	2.8663e-13
																			342	5.7	1.00101e-13	2.13428e-13	1.16415e-13	1.43315e-13
																			343	5.71667	5.00506e-14	1.06714e-13	5.82077e-14	7.16574e-14
																			344	5.73333	2.50253e-14	5.3357e-14	2.91038e-14	3.58287e-14
																			345	5.75	1.25127e-14	2.66785e-14	1.45519e-14	1.79144e-14
																			346	5.76667	6.25633e-15	1.33393e-14	7.27596e-15	8.95718e-15
																			347	5.78333	3.12816e-15	6.66963e-15	3.63798e-15	4.47859e-15
																			348	5.8	1.56408e-15	3.33481e-15	1.81899e-15	2.2393e-15
																			349	5.81667	7.82041e-16	1.66741e-15	9.09495e-16	1.11965e-15
																			350	5.83333	3.91021e-16	8.33703e-16	4.54747e-16	5.59824e-16
																			351	5.85	1.9551e-16	4.16852e-16	2.27374e-16	2.79912e-16
																			352	5.86667	9.77551e-17	2.08426e-16	1.13687e-16	1.39956e-16
																			353	5.88333	4.88776e-17	1.04213e-16	5.68434e-17	6.9978e-17
																			354	5.9	2.44388e-17	5.21065e-17	2.84217e-17	3.4989e-17
																			355	5.91667	1.22194e-17	2.60532e-17	1.42109e-17	1.74945e-17
																			356	5.93333	6.1097e-18	1.30266e-17	7.10543e-18	8.74725e-18
																			357	5.95	3.05485e-18	6.51331e-18	3.55271e-18	4.37362e-18
																			358	5.96667	1.52742e-18	3.25665e-18	1.77636e-18	2.18681e-18
																			359	5.98333	7.63712e-19	1.62833e-18	8.88178e-19	1.09341e-18
																			360	6	3.81856e-19	8.14164e-19	4.44089e-19	5.46703e-19
																			361	6.01667	1.90928e-19	4.07082e-19	2.22045e-19	2.73351e-19
																			362	6.03333	9.5464e-20	2.03541e-19	1.11022e-19	1.36676e-19
																			363	6.05	4.7732e-20	1.0177e-19	5.55112e-20	6.83379e-20
																			364	6.06667	2.3866e-20	5.08852e-20	2.77556e-20	3.41689e-20
																			365	6.08333	1.1933e-20	2.54426e-20	1.38778e-20	1.70845e-20
																			366	6.1	5.9665e-21	1.27213e-20	6.93889e-21	8.54223e-21
																			367	6.11667	2.98325e-21	6.36065e-21	3.46945e-21	4.27112e-21
																			368	6.13333	1.49163e-21	3.18033e-21	1.73472e-21	2.13556e-21
																			369	6.15	7.45813e-22	1.59016e-21	8.67362e-22	1.06778e-21
																			370	6.16667	3.72906e-22	7.95082e-22	4.33681e-22	5.3389e-22
																			371	6.18333	1.86453e-22	3.97541e-22	2.1684e-22	2.66945e-22
																			372	6.2	9.32266e-23	1.9877e-22	1.0842e-22	1.33472e-22
																			373	6.21667	4.66133e-23	9.93852e-23	5.42101e-23	6.67362e-23
																			374	6.23333	2.33066e-23	4.96926e-23	2.71051e-23	3.33681e-23
																			375	6.25	1.16533e-23	2.48463e-23	1.35525e-23	1.6684e-23
																			376	6.26667	5.82666e-24	1.24231e-23	6.77626e-24	8.34202e-24
																			377	6.28333	2.91333e-24	6.21157e-24	3.38813e-24	4.17101e-24
																			378	6.3	1.45667e-24	3.10579e-24	1.69407e-24	2.08551e-24
																			379	6.31667	7.28333e-25	1.55289e-24	8.47033e-25	1.04275e-24
																			380	6.33333	3.64166e-25	7.76447e-25	4.23516e-25	5.21377e-25
																			381	6.35	1.82083e-25	3.88223e-25	2.11758e-25	2.60688e-25
																			382	6.36667	9.10416e-26	1.94112e-25	1.05879e-25	1.30344e-25
																			383	6.38333	4.55208e-26	9.70559e-26	5.29396e-26	6.51721e-26
																			384	6.4	2.27604e-26	4.85279e-26	2.64698e-26	3.2586e-26
																			385	6.41667	1.13802e-26	2.4264e-26	1.32349e-26	1.6293e-26
																			386	6.43333	5.6901e-27	1.2132e-26	6.61744e-27	8.14651e-27
																			387	6.45	2.84505e-27	6.06599e-27	3.30872e-27	4.07325e-27
																			388	6.46667	1.42252e-27	3.033e-27	1.65436e-27	2.03663e-27
																			389	6.48333	7.11262e-28	1.5165e-27	8.27181e-28	1.01831e-27
																			390	6.5	3.55631e-28	7.58249e-28	4.1359e-28	5.09157e-28
																			391	6.51667	1.77816e-28	3.79124e-28	2.06795e-28	2.54578e-28
																			392	6.53333	8.89078e-29	1.89562e-28	1.03398e-28	1.27289e-28
																			393	6.55	4.44539e-29	9.47811e-29	5.16988e-29	6.36446e-29
																			394	6.56667	2.22269e-29	4.73906e-29	2.58494e-29	3.18223e-29
																			395	6.58333	1.11135e-29	2.36953e-29	1.29247e-29	1.59111e-29
																			396	6.6	5.55674e-30	1.18476e-29	6.46235e-30	7.95557e-30
																			397	6.61667	2.77837e-30	5.92382e-30	3.23117e-30	3.97779e-30
																			398	6.63333	1.38918e-30	2.96191e-30	1.61559e-30	1.98889e-30
																			399	6.65	6.94592e-31	1.48095e-30	8.07794e-31	9.94447e-31
																			400	6.66667	3.47296e-31	7.40477e-31	4.03897e-31	4.97223e-31
																			401	6.68333	1.73648e-31	3.70239e-31	2.01948e-31	2.48612e-31
																			402	6.7	8.6824e-32	1.85119e-31	1.00974e-31	1.24306e-31
																			403	6.71667	4.3412e-32	9.25597e-32	5.04871e-32	6.21529e-32
																			404	6.73333	2.1706e-32	4.62798e-32	2.52435e-32	3.10765e-32
																			405	6.75	1.0853e-32	2.31399e-32	1.26218e-32	1.55382e-32
																			406	6.76667	5.4265e-33	1.157e-32	6.31089e-33	7.76912e-33
																			407	6.78333	2.71325e-33	5.78498e-33	3.15544e-33	3.88456e-33
																			408	6.8	1.35663e-33	2.89249e-33	1.57772e-33	1.94228e-33
																			409	6.81667	6.78313e-34	1.44624e-33	7.88861e-34	9.71139e-34
																			410	6.83333	3.39156e-34	7.23122e-34	3.9443e-34	4.8557e-34
																			411	6.85	1.69578e-34	3.61561e-34	1.97215e-34	2.42785e-34
																			412	6.86667	8.47891e-35	1.80781e-34	9.86076e-35	1.21392e-34
																			413	6.88333	4.23945e-35	9.03903e-35	4.93038e-35	6.06962e-35
																			414	6.9	2.11973e-35	4.51952e-35	2.46519e-35	3.03481e-35
																			415	6.91667	1.05986e-35	2.25976e-35	1.2326e-35	1.51741e-35
																			416	6.93333	5.29932e-36	1.12988e-35	6.16298e-36	7.58703e-36
																			417	6.95	2.64966e-36	5.64939e-36	3.08149e-36	3.79351e-36
																			418	6.96667	1.32483e-36	2.8247e-36	1.54074e-36	1.89676e-36
																			419	6.98333	6.62415e-37	1.41235e-36	7.70372e-37	9.48378e-37
																			420	7	3.31207e-37	7.06174e-37	3.85186e-37	4.74189e-37
																			421	7.01667	1.65604e-37	3.53087e-37	1.92593e-37	2.37095e-37
																			422	7.03333	8.28018e-38	1.76544e-37	9.62965e-38	1.18547e-37
																			423	7.05	4.14009e-38	8.82718e-38	4.81482e-38	5.92736e-38
																			424	7.06667	2.07005e-38	4.41359e-38	2.40741e-38	2.96368e-38
																			425	7.08333	1.03502e-38	2.20679e-38	1.20371e-38	1.48184e-38

## Sheet: Fig. 6B
	Insulin Secretion at diferent H2S (uM)
		H2S	0.61	1.07		Corrected	0.38	1.61 uM					Time	Time, hours	ng/ml	dissolved, uM		Time	ng/ml	dissolved, uM		Time	ng/ml	dissolved, uM		Time	ng/ml	dissolved, uM
	Time, hours	Adjusted Time, hrs	9/3/2020, CH3	9/3/2020, CH4	Time, hours	Time, hrs	9/29/20, Ch4	9/3/2020, CH2					0	0	0	0		0	0	0		0	0	0		0	0	0
	-0.25	-3.25	0.0441807	0.0275429	-0.25	-1.25	0.0211158	0.04472					1	0.0166667	170.515	0.0170515		1	97.8333	0.00978333		1	170.515	0.0170515		1	170.515	0.0170515
	-0.166667	-3.16667	0.0461589	0.0285093	-0.166667	-1.16667	0.0231162	0.0379557					2	0.0333333	341.03	0.034103		2	195.667	0.0195667		2	341.03	0.034103		2	341.03	0.034103
	-0.0833333	-3.08333	0.0369271	0.0306837	-0.0833333	-1.08333	0.0175595	0.0402104					3	0.05	511.545	0.0511545		3	293.5	0.02935		3	511.545	0.0511545		3	511.545	0.0511545
	0	-3	0.0375865	0.0256101	0	-1	0.036008	0.0417136					4	0.0666667	682.061	0.0682061		4	391.333	0.0391333		4	682.061	0.0682061		4	682.061	0.0682061
	0.166667	-2.83333	0.179855	0.247644	0.166667	-0.833333	0.231162	0.211011					5	0.0833333	852.576	0.0852576		5	489.167	0.0489167		5	852.576	0.0852576		5	852.576	0.0852576
	0.333333	-2.66667	0.357072	0.353225	0.333333	-0.666667	0.524116	0.408493					6	0.1	1023.09	0.102309		6	587	0.0587		6	1023.09	0.102309		6	1023.09	0.102309
	0.5	-2.5	0.772667	0.797294	0.5	-0.5	0.725717	0.934423					7	0.116667	1193.61	0.119361		7	684.833	0.0684833		7	1193.61	0.119361		7	1193.61	0.119361
	0.666667	-2.33333	0.955819	0.844648	0.666667	-0.333333	0.99022	0.993611					8	0.133333	1364.12	0.136412		8	782.667	0.0782667		8	1364.12	0.136412		8	1364.12	0.136412
	0.833333	-2.16667	0.96637	0.958202	0.833333	-0.166667	0.967993	0.999812					9	0.15	1534.64	0.153464		9	880.5	0.08805		9	1534.64	0.153464		9	1534.64	0.153464
	1	-2	1.00198	0.965934	1	0	1.04179	1.00658					10	0.166667	1705.15	0.170515		10	978.333	0.0978333		10	1705.15	0.170515		10	1705.15	0.170515
	1.5	-1.5	1.00198	0.97584	1.16667	0.166667	1.00778	1.01804					11	0.183333	1875.67	0.187567		11	1076.17	0.107617		11	1875.67	0.187567		11	1875.67	0.187567
	2	-1	1.03363	0.968833	1.33333	0.333333	1.01045	1.00883					12	0.2	2046.18	0.204618		12	1174	0.1174		12	2046.18	0.204618		12	2046.18	0.204618
	2.5	-0.5	0.933399	1.01522	1.5	0.5	1.08046	0.966366					13	0.216667	2216.7	0.22167		13	1271.83	0.127183		13	2216.7	0.22167		13	2216.7	0.22167
	3	0	1.03099	1.04011	1.66667	0.666667	1.06935	0.891206					14	0.233333	2387.21	0.238721		14	1369.67	0.136967		14	2387.21	0.238721		14	2387.21	0.238721
	3.16667	0.166667	1.04946	1.03407	1.83333	0.833333	1.11358	1.03551					15	0.25	2557.73	0.255773		15	1467.5	0.14675		15	2557.73	0.255773		15	2557.73	0.255773
	3.33333	0.333333	0.984174	1.04397	2	1	1.26828	1.12044					16	0.266667	2728.24	0.272824		16	1565.33	0.156533		16	2728.24	0.272824		16	2728.24	0.272824
	3.5	0.5	1.00857	1.01643	2.16667	1.16667	1.28317	1.21909					17	0.283333	2898.76	0.289876		17	1663.17	0.166317		17	2898.76	0.289876		17	2898.76	0.289876
	3.66667	0.666667	1.01055	1.00145	2.33333	1.33333	1.28117	1.28974					18	0.3	3069.27	0.306927		18	1761	0.1761		18	3069.27	0.306927		18	3069.27	0.306927
	3.83333	0.833333	1.0455	1.06475	2.5	1.5	1.30051	1.15915					19	0.316667	3239.79	0.323979		19	1858.83	0.185883		19	3239.79	0.323979		19	3239.79	0.323979
	4	1	1.00198	1.19497	2.66667	1.66667	1.3623	1.04679					20	0.333333	3410.3	0.34103		20	1956.67	0.195667		20	3410.3	0.34103		20	3410.3	0.34103
	4.16667	1.16667	1.10468	1.31916	2.83333	1.83333	1.32629	0.86227					21	0.35	3580.82	0.358082		21	2054.5	0.20545		21	3580.82	0.358082		21	3580.82	0.358082
	4.33333	1.33333	1.28058	1.4071	3	2	1.3134	0.746148					22	0.366667	3751.33	0.375133		22	2152.33	0.215233		22	3751.33	0.375133		22	3580.82	0.358082
	4.5	1.5	1.33993	1.37545	3.33333	2.33333	1.36497	0.642991					23	0.383333	3921.85	0.392185		23	2250.17	0.225017		23	3921.85	0.392185		23	3580.82	0.358082
	4.66667	1.66667	1.2608	1.32713	3.66667	2.66667	1.39275	0.635287					24	0.4	4092.36	0.409236		24	2348	0.2348		24	4092.36	0.409236		24	3580.82	0.358082
	4.83333	1.83333	1.18183	0.98188	4	3	1.34852	0.627772					25	0.416667	4262.88	0.426288		25	2445.83	0.244583		25	4262.88	0.426288		25	3580.82	0.358082
	5	2	1.1238	0.808166	4.33333	3.33333	1.3283	0.658963					26	0.433333	4433.39	0.443339		26	2543.67	0.254367		26	4433.39	0.443339		26	3580.82	0.358082
	5.16667	2.16667	1.1304	0.830877	4.66667	3.66667	1.36052	0.649004					27	0.45	4603.91	0.460391		27	2641.5	0.26415		27	4603.91	0.460391		27	3580.82	0.358082
	5.33333	2.33333	1.08226	0.834743	5	4	1.26828	0.617249					28	0.466667	4774.42	0.477442		28	2739.33	0.273933		28	4774.42	0.477442		28	3580.82	0.358082
	5.5	2.5	1.07765	0.83	5.08333	4.08333	1.06668	0.654265					29	0.483333	4944.94	0.494494		29	2837.17	0.283717		29	4944.94	0.494494		29	3580.82	0.358082
	5.66667	2.66667	1.10468	0.833776	5.58333	4.58333	1.09802	0.713641					30	0.5	5115.45	0.511545		30	2935	0.2935		30	5115.45	0.511545		30	3580.82	0.358082
	5.83333	2.83333	1.09281	0.794395	6.08333	5.08333	0.95599	0.804585					31	0.516667	5285.97	0.528597		31	3032.83	0.303283		31	5285.97	0.528597		31	3580.82	0.358082
	6	3	1.11523	0.815898	6.58333	5.58333	0.844632	0.822811					32	0.533333	5456.48	0.545648		32	3130.67	0.313067		32	5456.48	0.545648		32	3580.82	0.358082
													33	0.55	5627	0.5627		33	3228.5	0.32285		33	5627	0.5627		33	3580.82	0.358082
													34	0.566667	5797.52	0.579752		34	3326.33	0.332633		34	5797.52	0.579752		34	3580.82	0.358082
													35	0.583333	5968.03	0.596803		35	3424.17	0.342417		35	5968.03	0.596803		35	3580.82	0.358082
													36	0.6	6138.55	0.613855		36	3522	0.3522		36	6138.55	0.613855		36	3580.82	0.358082
													37	0.616667	6309.06	0.630906		37	3619.83	0.361983		37	6309.06	0.630906		37	3580.82	0.358082
													38	0.633333	6479.58	0.647958		38	3717.67	0.371767		38	6479.58	0.647958		38	3580.82	0.358082
													39	0.65	6650.09	0.665009		39	3815.5	0.38155		39	6650.09	0.665009		39	3580.82	0.358082
													40	0.666667	6820.61	0.682061		40	3913.33	0.391333		40	6820.61	0.682061		40	3580.82	0.358082
													41	0.683333	6991.12	0.699112		41	4011.17	0.401117		41	6991.12	0.699112		41	3580.82	0.358082
													42	0.7	7161.64	0.716164		42	4109	0.4109		42	7161.64	0.716164		42	3580.82	0.358082
													43	0.716667	7332.15	0.733215		43	4206.83	0.420683		43	7332.15	0.733215		43	3580.82	0.358082
													44	0.733333	7502.67	0.750267		44	4304.67	0.430467		44	7502.67	0.750267		44	3580.82	0.358082
													45	0.75	7673.18	0.767318		45	4402.5	0.44025		45	7673.18	0.767318		45	3580.82	0.358082
													46	0.766667	7843.7	0.78437		46	4500.33	0.450033		46	7843.7	0.78437		46	3580.82	0.358082
													47	0.783333	8014.21	0.801421		47	4598.17	0.459817		47	8014.21	0.801421		47	3580.82	0.358082
													48	0.8	8184.73	0.818473		48	4696	0.4696		48	8184.73	0.818473		48	3580.82	0.358082
													49	0.816667	8355.24	0.835524		49	4793.83	0.479383		49	8355.24	0.835524		49	3580.82	0.358082
													50	0.833333	8525.76	0.852576		50	4891.67	0.489167		50	8525.76	0.852576		50	3580.82	0.358082
													51	0.85	8696.27	0.869627		51	4989.5	0.49895		51	8696.27	0.869627		51	3580.82	0.358082
													52	0.866667	8866.79	0.886679		52	5087.33	0.508733		52	8866.79	0.886679		52	3580.82	0.358082
													53	0.883333	9037.3	0.90373		53	5185.17	0.518517		53	9037.3	0.90373		53	3580.82	0.358082
													54	0.9	9207.82	0.920782		54	5283	0.5283		54	9207.82	0.920782		54	3580.82	0.358082
													55	0.916667	9378.33	0.937833		55	5380.83	0.538083		55	9378.33	0.937833		55	3580.82	0.358082
													56	0.933333	9548.85	0.954885		56	5478.67	0.547867		56	9548.85	0.954885		56	3580.82	0.358082
													57	0.95	9719.36	0.971936		57	5576.5	0.55765		57	9719.36	0.971936		57	3580.82	0.358082
													58	0.966667	9889.88	0.988988		58	5674.33	0.567433		58	9889.88	0.988988		58	3580.82	0.358082
													59	0.983333	10060.4	1.00604		59	5772.17	0.577217		59	10060.4	1.00604		59	3580.82	0.358082
													60	1	10230.9	1.02309		60	5870	0.587		60	10230.9	1.02309		60	3580.82	0.358082
													61	1.01667	10401.4	1.04014		61	5870	0.587		61	10230.9	1.02309		61	3580.82	0.358082
													62	1.03333	10571.9	1.05719		62	5870	0.587		62	10230.9	1.02309		62	3580.82	0.358082
													63	1.05	10742.5	1.07425		63	5870	0.587		63	10230.9	1.02309		63	3580.82	0.358082
													64	1.06667	10913	1.0913		64	5870	0.587		64	10230.9	1.02309		64	3580.82	0.358082
													65	1.08333	11083.5	1.10835		65	5870	0.587		65	10230.9	1.02309		65	3580.82	0.358082
													66	1.1	11254	1.1254		66	5870	0.587		66	10230.9	1.02309		66	3580.82	0.358082
													67	1.11667	11424.5	1.14245		67	5870	0.587		67	10230.9	1.02309		67	3580.82	0.358082
													68	1.13333	11595	1.1595		68	5870	0.587		68	10230.9	1.02309		68	3580.82	0.358082
													69	1.15	11765.5	1.17655		69	5870	0.587		69	10230.9	1.02309		69	3580.82	0.358082
													70	1.16667	11936.1	1.19361		70	5870	0.587		70	10230.9	1.02309		70	3580.82	0.358082
													71	1.18333	12106.6	1.21066		71	5870	0.587		71	10230.9	1.02309		71	3580.82	0.358082
													72	1.2	12277.1	1.22771		72	5870	0.587		72	10230.9	1.02309		72	3580.82	0.358082
													73	1.21667	12447.6	1.24476		73	5870	0.587		73	10230.9	1.02309		73	3580.82	0.358082
													74	1.23333	12618.1	1.26181		74	5870	0.587		74	10230.9	1.02309		74	3580.82	0.358082
													75	1.25	12788.6	1.27886		75	5870	0.587		75	10230.9	1.02309		75	3580.82	0.358082
													76	1.26667	12959.2	1.29592		76	5870	0.587		76	10230.9	1.02309		76	3580.82	0.358082	plat =
													77	1.28333	13129.7	1.31297		77	5870	0.587		77	10230.9	1.02309		77	3580.82	0.358082
													78	1.3	13300.2	1.33002		78	5870	0.587		78	10230.9	1.02309		78	3580.82	0.358082
													79	1.31667	13470.7	1.34707		79	5870	0.587		79	10230.9	1.02309		79	3580.82	0.358082
													80	1.33333	13641.2	1.36412		80	5870	0.587		80	10230.9	1.02309		80	3580.82	0.358082
													81	1.35	13811.7	1.38117		81	5870	0.587		81	10230.9	1.02309		81	3580.82	0.358082
													82	1.36667	13982.2	1.39822		82	5870	0.587		82	10230.9	1.02309		82	3580.82	0.358082
													83	1.38333	14152.8	1.41528		83	5870	0.587		83	10230.9	1.02309		83	3580.82	0.358082
													84	1.4	14323.3	1.43233		84	5870	0.587		84	10230.9	1.02309		84	3580.82	0.358082
													85	1.41667	14493.8	1.44938		85	5870	0.587		85	10230.9	1.02309		85	3580.82	0.358082
													86	1.43333	14664.3	1.46643		86	5870	0.587		86	10230.9	1.02309		86	3580.82	0.358082
													87	1.45	14834.8	1.48348		87	5870	0.587		87	10230.9	1.02309		87	3580.82	0.358082
													88	1.46667	15005.3	1.50053		88	5870	0.587		88	10230.9	1.02309		88	3580.82	0.358082
													89	1.48333	15175.8	1.51758		89	5870	0.587		89	10230.9	1.02309		89	3580.82	0.358082
													90	1.5	15346.4	1.53464		90	5870	0.587		90	10230.9	1.02309		90	3580.82	0.358082
													91	1.51667	15346.4	1.53464		91	5870	0.587		91	10230.9	1.02309		91	3580.82	0.358082
													92	1.53333	15346.4	1.53464		92	5870	0.587		92	10230.9	1.02309		92	3580.82	0.358082
													93	1.55	15346.4	1.53464		93	5870	0.587		93	10230.9	1.02309		93	3580.82	0.358082
													94	1.56667	15346.4	1.53464		94	5870	0.587		94	10230.9	1.02309		94	3580.82	0.358082
													95	1.58333	15346.4	1.53464		95	5870	0.587		95	10230.9	1.02309		95	3580.82	0.358082
													96	1.6	15346.4	1.53464		96	5870	0.587		96	10230.9	1.02309		96	3580.82	0.358082
													97	1.61667	15346.4	1.53464		97	5870	0.587		97	10230.9	1.02309		97	3580.82	0.358082
													98	1.63333	15346.4	1.53464		98	5870	0.587		98	10230.9	1.02309		98	3580.82	0.358082
													99	1.65	15346.4	1.53464		99	5870	0.587		99	10230.9	1.02309		99	3580.82	0.358082
													100	1.66667	15346.4	1.53464		100	5870	0.587		100	10230.9	1.02309		100	3580.82	0.358082
													101	1.68333	15346.4	1.53464		101	5870	0.587		101	10230.9	1.02309		101	3580.82	0.358082
													102	1.7	15346.4	1.53464		102	5870	0.587		102	10230.9	1.02309		102	3580.82	0.358082
													103	1.71667	15346.4	1.53464		103	5870	0.587		103	10230.9	1.02309		103	3580.82	0.358082
													104	1.73333	15346.4	1.53464		104	5870	0.587		104	10230.9	1.02309		104	3580.82	0.358082
													105	1.75	15346.4	1.53464		105	5870	0.587		105	10230.9	1.02309		105	3580.82	0.358082
													106	1.76667	15346.4	1.53464		106	5870	0.587		106	10230.9	1.02309		106	3580.82	0.358082
													107	1.78333	15346.4	1.53464		107	5870	0.587		107	10230.9	1.02309		107	3580.82	0.358082
													108	1.8	15346.4	1.53464		108	5870	0.587		108	10230.9	1.02309		108	3580.82	0.358082
													109	1.81667	15346.4	1.53464		109	5870	0.587		109	10230.9	1.02309		109	3580.82	0.358082
													110	1.83333	15346.4	1.53464		110	5870	0.587		110	10230.9	1.02309		110	3580.82	0.358082
													111	1.85	15346.4	1.53464		111	5870	0.587		111	10230.9	1.02309		111	3580.82	0.358082
													112	1.86667	15346.4	1.53464		112	5870	0.587		112	10230.9	1.02309		112	3580.82	0.358082
													113	1.88333	15346.4	1.53464		113	5870	0.587		113	10230.9	1.02309		113	3580.82	0.358082
													114	1.9	15346.4	1.53464		114	5870	0.587		114	10230.9	1.02309		114	3580.82	0.358082
													115	1.91667	15346.4	1.53464		115	5870	0.587		115	10230.9	1.02309		115	3580.82	0.358082
													116	1.93333	15346.4	1.53464		116	5870	0.587		116	10230.9	1.02309		116	3580.82	0.358082
													117	1.95	15346.4	1.53464		117	5870	0.587		117	10230.9	1.02309		117	3580.82	0.358082
													118	1.96667	15346.4	1.53464		118	5870	0.587		118	10230.9	1.02309		118	3580.82	0.358082
													119	1.98333	15346.4	1.53464		119	5870	0.587		119	10230.9	1.02309		119	3580.82	0.358082
													120	2	15346.4	1.53464		120	5870	0.587		120	10230.9	1.02309		120	3580.82	0.358082
													121	2.01667	15346.4	1.53464		121	5870	0.587		121	10230.9	1.02309		121	3580.82	0.358082
													122	2.03333	15346.4	1.53464		122	5870	0.587		122	10230.9	1.02309		122	3580.82	0.358082
													123	2.05	15346.4	1.53464		123	5870	0.587		123	10230.9	1.02309		123	3580.82	0.358082
													124	2.06667	15346.4	1.53464		124	5870	0.587		124	10230.9	1.02309		124	3580.82	0.358082
													125	2.08333	15346.4	1.53464		125	5870	0.587		125	10230.9	1.02309		125	3580.82	0.358082
													126	2.1	15346.4	1.53464		126	5870	0.587		126	10230.9	1.02309		126	3580.82	0.358082
													127	2.11667	15346.4	1.53464		127	5870	0.587		127	10230.9	1.02309		127	3580.82	0.358082
													128	2.13333	15346.4	1.53464		128	5870	0.587		128	10230.9	1.02309		128	3580.82	0.358082
													129	2.15	15346.4	1.53464		129	5870	0.587		129	10230.9	1.02309		129	3580.82	0.358082
													130	2.16667	15346.4	1.53464		130	5870	0.587		130	10230.9	1.02309		130	3580.82	0.358082
													131	2.18333	15346.4	1.53464		131	5870	0.587		131	10230.9	1.02309		131	3580.82	0.358082
													132	2.2	15346.4	1.53464		132	5870	0.587		132	10230.9	1.02309		132	3580.82	0.358082
													133	2.21667	15346.4	1.53464		133	5870	0.587		133	10230.9	1.02309		133	3580.82	0.358082
													134	2.23333	15346.4	1.53464		134	5870	0.587		134	10230.9	1.02309		134	3580.82	0.358082
													135	2.25	15346.4	1.53464		135	5870	0.587		135	10230.9	1.02309		135	3580.82	0.358082
													136	2.26667	15346.4	1.53464		136	5870	0.587		136	10230.9	1.02309		136	3580.82	0.358082
													137	2.28333	15346.4	1.53464		137	5870	0.587		137	10230.9	1.02309		137	3580.82	0.358082
													138	2.3	15346.4	1.53464		138	5870	0.587		138	10230.9	1.02309		138	3580.82	0.358082
													139	2.31667	15346.4	1.53464		139	5870	0.587		139	10230.9	1.02309		139	3580.82	0.358082
													140	2.33333	15346.4	1.53464		140	5870	0.587		140	10230.9	1.02309		140	3580.82	0.358082
													141	2.35	15346.4	1.53464		141	5870	0.587		141	10230.9	1.02309		141	3580.82	0.358082
													142	2.36667	15346.4	1.53464		142	5870	0.587		142	10230.9	1.02309		142	3580.82	0.358082
													143	2.38333	15346.4	1.53464		143	5870	0.587		143	10230.9	1.02309		143	3580.82	0.358082
													144	2.4	15346.4	1.53464		144	5870	0.587		144	10230.9	1.02309		144	3580.82	0.358082
													145	2.41667	15346.4	1.53464		145	5870	0.587		145	10230.9	1.02309		145	3580.82	0.358082
													146	2.43333	15346.4	1.53464		146	5870	0.587		146	10230.9	1.02309		146	3580.82	0.358082
													147	2.45	15346.4	1.53464		147	5870	0.587		147	10230.9	1.02309		147	3580.82	0.358082
													148	2.46667	15346.4	1.53464		148	5870	0.587		148	10230.9	1.02309		148	3580.82	0.358082
													149	2.48333	15346.4	1.53464		149	5870	0.587		149	10230.9	1.02309		149	3580.82	0.358082
													150	2.5	15346.4	1.53464		150	5870	0.587		150	10230.9	1.02309		150	3580.82	0.358082
													151	2.51667	15346.4	1.53464		151	5870	0.587		151	10230.9	1.02309		151	3580.82	0.358082
													152	2.53333	15346.4	1.53464		152	5870	0.587		152	10230.9	1.02309		152	3580.82	0.358082
													153	2.55	15346.4	1.53464		153	5870	0.587		153	10230.9	1.02309		153	3580.82	0.358082
													154	2.56667	15346.4	1.53464		154	5870	0.587		154	10230.9	1.02309		154	3580.82	0.358082
													155	2.58333	15346.4	1.53464		155	5870	0.587		155	10230.9	1.02309		155	3580.82	0.358082
													156	2.6	15346.4	1.53464		156	5870	0.587		156	10230.9	1.02309		156	3580.82	0.358082
													157	2.61667	15346.4	1.53464		157	5870	0.587		157	10230.9	1.02309		157	3580.82	0.358082
													158	2.63333	15346.4	1.53464		158	5870	0.587		158	10230.9	1.02309		158	3580.82	0.358082
													159	2.65	15346.4	1.53464		159	5870	0.587		159	10230.9	1.02309		159	3580.82	0.358082
													160	2.66667	15346.4	1.53464		160	5870	0.587		160	10230.9	1.02309		160	3580.82	0.358082
													161	2.68333	15346.4	1.53464		161	5870	0.587		161	10230.9	1.02309		161	3580.82	0.358082
													162	2.7	15346.4	1.53464		162	5870	0.587		162	10230.9	1.02309		162	3580.82	0.358082
													163	2.71667	15346.4	1.53464		163	5870	0.587		163	10230.9	1.02309		163	3580.82	0.358082
													164	2.73333	15346.4	1.53464		164	5870	0.587		164	10230.9	1.02309		164	3580.82	0.358082
													165	2.75	15346.4	1.53464		165	5870	0.587		165	10230.9	1.02309		165	3580.82	0.358082
													166	2.76667	15346.4	1.53464		166	5870	0.587		166	10230.9	1.02309		166	3580.82	0.358082
													167	2.78333	15346.4	1.53464		167	5870	0.587		167	10230.9	1.02309		167	3580.82	0.358082
													168	2.8	15346.4	1.53464		168	5870	0.587		168	10230.9	1.02309		168	3580.82	0.358082
													169	2.81667	15346.4	1.53464		169	5870	0.587		169	10230.9	1.02309		169	3580.82	0.358082
													170	2.83333	15346.4	1.53464		170	5870	0.587		170	10230.9	1.02309		170	3580.82	0.358082
													171	2.85	15346.4	1.53464		171	5870	0.587		171	10230.9	1.02309		171	3580.82	0.358082
													172	2.86667	15346.4	1.53464		172	5870	0.587		172	10230.9	1.02309		172	3580.82	0.358082
													173	2.88333	15346.4	1.53464		173	5870	0.587		173	10230.9	1.02309		173	3580.82	0.358082
													174	2.9	15346.4	1.53464		174	5870	0.587		174	10230.9	1.02309		174	3580.82	0.358082
													175	2.91667	15346.4	1.53464		175	5870	0.587		175	10230.9	1.02309		175	3580.82	0.358082
													176	2.93333	15346.4	1.53464		176	5870	0.587		176	10230.9	1.02309		176	3580.82	0.358082
													177	2.95	15346.4	1.53464		177	5870	0.587		177	10230.9	1.02309		177	3580.82	0.358082
													178	2.96667	15346.4	1.53464		178	5870	0.587		178	10230.9	1.02309		178	3580.82	0.358082
													179	2.98333	15346.4	1.53464		179	5870	0.587		179	10230.9	1.02309		179	3580.82	0.358082
													180	3	15346.4	1.53464		180	5870	0.587		180	10230.9	1.02309		180	3580.82	0.358082
													181	3.01667	15346.4	1.53464		181	5870	0.587		181	10230.9	1.02309		181	3580.82	0.358082
													182	3.03333	15346.4	1.53464		182	5870	0.587		182	10230.9	1.02309		182	3580.82	0.358082
													183	3.05	15346.4	1.53464		183	5870	0.587		183	10230.9	1.02309		183	3580.82	0.358082
													184	3.06667	15346.4	1.53464		184	5870	0.587		184	10230.9	1.02309		184	3580.82	0.358082
													185	3.08333	15346.4	1.53464		185	5870	0.587		185	10230.9	1.02309		185	3580.82	0.358082
													186	3.1	15346.4	1.53464		186	5870	0.587		186	10230.9	1.02309		186	3580.82	0.358082
													187	3.11667	15346.4	1.53464		187	5870	0.587		187	10230.9	1.02309		187	3580.82	0.358082
													188	3.13333	15346.4	1.53464		188	5870	0.587		188	10230.9	1.02309		188	3580.82	0.358082
													189	3.15	15346.4	1.53464		189	5870	0.587		189	10230.9	1.02309		189	3580.82	0.358082
													190	3.16667	15346.4	1.53464		190	5870	0.587		190	10230.9	1.02309		190	3580.82	0.358082
													191	3.18333	15346.4	1.53464		191	5870	0.587		191	10230.9	1.02309		191	3580.82	0.358082
													192	3.2	15346.4	1.53464		192	5870	0.587		192	10230.9	1.02309		192	3580.82	0.358082
													193	3.21667	15346.4	1.53464		193	5870	0.587		193	10230.9	1.02309		193	3580.82	0.358082
													194	3.23333	15346.4	1.53464		194	5870	0.587		194	10230.9	1.02309		194	3580.82	0.358082
													195	3.25	15346.4	1.53464		195	5870	0.587		195	10230.9	1.02309		195	3580.82	0.358082
													196	3.26667	15346.4	1.53464		196	5870	0.587		196	10230.9	1.02309		196	3580.82	0.358082
													197	3.28333	15346.4	1.53464		197	5870	0.587		197	10230.9	1.02309		197	3580.82	0.358082
													198	3.3	15346.4	1.53464		198	5870	0.587		198	10230.9	1.02309		198	3580.82	0.358082
													199	3.31667	15346.4	1.53464		199	5870	0.587		199	10230.9	1.02309		199	3580.82	0.358082
													200	3.33333	15346.4	1.53464		200	5870	0.587		200	10230.9	1.02309		200	3580.82	0.358082
													201	3.35	15346.4	1.53464		201	5870	0.587		201	10230.9	1.02309		201	3580.82	0.358082
													202	3.36667	15346.4	1.53464		202	5870	0.587		202	10230.9	1.02309		202	3580.82	0.358082
													203	3.38333	15346.4	1.53464		203	5870	0.587		203	10230.9	1.02309		203	3580.82	0.358082
													204	3.4	15346.4	1.53464		204	5870	0.587		204	10230.9	1.02309		204	3580.82	0.358082
													205	3.41667	15346.4	1.53464		205	5870	0.587		205	10230.9	1.02309		205	3580.82	0.358082
													206	3.43333	15346.4	1.53464		206	5870	0.587		206	10230.9	1.02309		206	3580.82	0.358082
													207	3.45	15346.4	1.53464		207	5870	0.587		207	10230.9	1.02309		207	3580.82	0.358082
													208	3.46667	15346.4	1.53464		208	5870	0.587		208	10230.9	1.02309		208	3580.82	0.358082
													209	3.48333	15346.4	1.53464		209	5870	0.587		209	10230.9	1.02309		209	3580.82	0.358082
													210	3.5	15346.4	1.53464		210	5870	0.587		210	10230.9	1.02309		210	3580.82	0.358082
													211	3.51667	15346.4	1.53464		211	5870	0.587		211	10230.9	1.02309		211	3580.82	0.358082
													212	3.53333	15346.4	1.53464		212	5870	0.587		212	10230.9	1.02309		212	3580.82	0.358082
													213	3.55	15346.4	1.53464		213	5870	0.587		213	10230.9	1.02309		213	3580.82	0.358082
													214	3.56667	15346.4	1.53464		214	5870	0.587		214	10230.9	1.02309		214	3580.82	0.358082
													215	3.58333	15346.4	1.53464		215	5870	0.587		215	10230.9	1.02309		215	3580.82	0.358082
													216	3.6	15346.4	1.53464		216	5870	0.587		216	10230.9	1.02309		216	3580.82	0.358082
													217	3.61667	15346.4	1.53464		217	5870	0.587		217	10230.9	1.02309		217	3580.82	0.358082
													218	3.63333	15346.4	1.53464		218	5870	0.587		218	10230.9	1.02309		218	3580.82	0.358082
													219	3.65	15346.4	1.53464		219	5870	0.587		219	10230.9	1.02309		219	3580.82	0.358082
													220	3.66667	15346.4	1.53464		220	5870	0.587		220	10230.9	1.02309		220	3580.82	0.358082
													221	3.68333	15346.4	1.53464		221	5870	0.587		221	10230.9	1.02309		221	3580.82	0.358082
													222	3.7	15346.4	1.53464		222	5870	0.587		222	10230.9	1.02309		222	3580.82	0.358082
													223	3.71667	15346.4	1.53464		223	5870	0.587		223	10230.9	1.02309		223	3580.82	0.358082
													224	3.73333	15346.4	1.53464		224	5870	0.587		224	10230.9	1.02309		224	3580.82	0.358082
													225	3.75	15346.4	1.53464		225	5870	0.587		225	10230.9	1.02309		225	3580.82	0.358082
													226	3.76667	15346.4	1.53464		226	5870	0.587		226	10230.9	1.02309		226	3580.82	0.358082
													227	3.78333	15346.4	1.53464		227	5870	0.587		227	10230.9	1.02309		227	3580.82	0.358082
													228	3.8	15346.4	1.53464		228	5870	0.587		228	10230.9	1.02309		228	3580.82	0.358082
													229	3.81667	15346.4	1.53464		229	5870	0.587		229	10230.9	1.02309		229	3580.82	0.358082
													230	3.83333	15346.4	1.53464		230	5870	0.587		230	10230.9	1.02309		230	3580.82	0.358082
													231	3.85	15346.4	1.53464		231	5870	0.587		231	10230.9	1.02309		231	3580.82	0.358082
													232	3.86667	15346.4	1.53464		232	5870	0.587		232	10230.9	1.02309		232	3580.82	0.358082
													233	3.88333	15346.4	1.53464		233	5870	0.587		233	10230.9	1.02309		233	3580.82	0.358082
													234	3.9	15346.4	1.53464		234	5870	0.587		234	10230.9	1.02309		234	3580.82	0.358082
													235	3.91667	15346.4	1.53464		235	5870	0.587		235	10230.9	1.02309		235	3580.82	0.358082
													236	3.93333	15346.4	1.53464		236	5870	0.587		236	10230.9	1.02309		236	3580.82	0.358082
													237	3.95	15346.4	1.53464		237	5870	0.587		237	10230.9	1.02309		237	3580.82	0.358082
													238	3.96667	15346.4	1.53464		238	5870	0.587		238	10230.9	1.02309		238	3580.82	0.358082
													239	3.98333	15346.4	1.53464		239	5870	0.587		239	10230.9	1.02309		239	3580.82	0.358082
													240	4	15346.4	1.53464		240	5870	0.587		240	10230.9	1.02309		240	3580.82	0.358082
													241	4.01667	7673.18	0.767318		241	2935	0.2935		241	5115.45	0.511545		241	1790.41	0.179041
													242	4.03333	3836.59	0.383659		242	1467.5	0.14675		242	2557.73	0.255773		242	895.205	0.0895205
													243	4.05	1918.3	0.19183		243	733.75	0.073375		243	1278.86	0.127886		243	447.602	0.0447602
													244	4.06667	959.148	0.0959148		244	366.875	0.0366875		244	639.432	0.0639432		244	223.801	0.0223801
													245	4.08333	479.574	0.0479574		245	183.438	0.0183437		245	319.716	0.0319716		245	111.901	0.0111901
													246	4.1	239.787	0.0239787		246	91.7188	0.00917187		246	159.858	0.0159858		246	55.9503	0.00559503
													247	4.11667	119.893	0.0119893		247	45.8594	0.00458594		247	79.929	0.0079929		247	27.9751	0.00279751
													248	4.13333	59.9467	0.00599467		248	22.9297	0.00229297		248	39.9645	0.00399645		248	13.9876	0.00139876
													249	4.15	29.9734	0.00299734		249	11.4648	0.00114648		249	19.9822	0.00199822		249	6.99379	0.000699379
													250	4.16667	14.9867	0.00149867		250	5.73242	0.000573242		250	9.99112	0.000999112		250	3.49689	0.000349689
													251	4.18333	7.49334	0.000749334		251	2.86621	0.000286621		251	4.99556	0.000499556		251	1.74845	0.000174845
													252	4.2	3.74667	0.000374667		252	1.43311	0.000143311		252	2.49778	0.000249778		252	0.874223	8.74223e-05
													253	4.21667	1.87334	0.000187334		253	0.716553	7.16553e-05		253	1.24889	0.000124889		253	0.437112	4.37112e-05
													254	4.23333	0.936668	9.36668e-05		254	0.358276	3.58276e-05		254	0.624445	6.24445e-05		254	0.218556	2.18556e-05
													255	4.25	0.468334	4.68334e-05		255	0.179138	1.79138e-05		255	0.312223	3.12223e-05		255	0.109278	1.09278e-05
													256	4.26667	0.234167	2.34167e-05		256	0.0895691	8.95691e-06		256	0.156111	1.56111e-05		256	0.0546389	5.46389e-06
													257	4.28333	0.117083	1.17083e-05		257	0.0447845	4.47845e-06		257	0.0780556	7.80556e-06		257	0.0273195	2.73195e-06
													258	4.3	0.0585417	5.85417e-06		258	0.0223923	2.23923e-06		258	0.0390278	3.90278e-06		258	0.0136597	1.36597e-06
													259	4.31667	0.0292709	2.92709e-06		259	0.0111961	1.11961e-06		259	0.0195139	1.95139e-06		259	0.00682987	6.82987e-07
													260	4.33333	0.0146354	1.46354e-06		260	0.00559807	5.59807e-07		260	0.00975696	9.75696e-07		260	0.00341493	3.41493e-07
													261	4.35	0.00731772	7.31772e-07		261	0.00279903	2.79903e-07		261	0.00487848	4.87848e-07		261	0.00170747	1.70747e-07
													262	4.36667	0.00365886	3.65886e-07		262	0.00139952	1.39952e-07		262	0.00243924	2.43924e-07		262	0.000853734	8.53734e-08
													263	4.38333	0.00182943	1.82943e-07		263	0.000699759	6.99759e-08		263	0.00121962	1.21962e-07		263	0.000426867	4.26867e-08
													264	4.4	0.000914715	9.14715e-08		264	0.000349879	3.49879e-08		264	0.00060981	6.0981e-08		264	0.000213433	2.13433e-08
													265	4.41667	0.000457357	4.57357e-08		265	0.00017494	1.7494e-08		265	0.000304905	3.04905e-08		265	0.000106717	1.06717e-08
													266	4.43333	0.000228679	2.28679e-08		266	8.74698e-05	8.74698e-09		266	0.000152452	1.52452e-08		266	5.33583e-05	5.33583e-09
													267	4.45	0.000114339	1.14339e-08		267	4.37349e-05	4.37349e-09		267	7.62262e-05	7.62262e-09		267	2.66792e-05	2.66792e-09
													268	4.46667	5.71697e-05	5.71697e-09		268	2.18675e-05	2.18675e-09		268	3.81131e-05	3.81131e-09		268	1.33396e-05	1.33396e-09
													269	4.48333	2.85848e-05	2.85848e-09		269	1.09337e-05	1.09337e-09		269	1.90566e-05	1.90566e-09		269	6.66979e-06	6.66979e-10
													270	4.5	1.42924e-05	1.42924e-09		270	5.46686e-06	5.46686e-10		270	9.52828e-06	9.52828e-10		270	3.3349e-06	3.3349e-10
													271	4.51667	7.14621e-06	7.14621e-10		271	2.73343e-06	2.73343e-10		271	4.76414e-06	4.76414e-10		271	1.66745e-06	1.66745e-10
													272	4.53333	3.5731e-06	3.5731e-10		272	1.36672e-06	1.36672e-10		272	2.38207e-06	2.38207e-10		272	8.33724e-07	8.33724e-11
													273	4.55	1.78655e-06	1.78655e-10		273	6.83358e-07	6.83358e-11		273	1.19103e-06	1.19103e-10		273	4.16862e-07	4.16862e-11
													274	4.56667	8.93276e-07	8.93276e-11		274	3.41679e-07	3.41679e-11		274	5.95517e-07	5.95517e-11		274	2.08431e-07	2.08431e-11
													275	4.58333	4.46638e-07	4.46638e-11		275	1.70839e-07	1.70839e-11		275	2.97759e-07	2.97759e-11		275	1.04216e-07	1.04216e-11
													276	4.6	2.23319e-07	2.23319e-11		276	8.54197e-08	8.54197e-12		276	1.48879e-07	1.48879e-11		276	5.21078e-08	5.21078e-12
													277	4.61667	1.11659e-07	1.11659e-11		277	4.27099e-08	4.27099e-12		277	7.44397e-08	7.44397e-12		277	2.60539e-08	2.60539e-12
													278	4.63333	5.58297e-08	5.58297e-12		278	2.13549e-08	2.13549e-12		278	3.72198e-08	3.72198e-12		278	1.30269e-08	1.30269e-12
													279	4.65	2.79149e-08	2.79149e-12		279	1.06775e-08	1.06775e-12		279	1.86099e-08	1.86099e-12		279	6.51347e-09	6.51347e-13
													280	4.66667	1.39574e-08	1.39574e-12		280	5.33873e-09	5.33873e-13		280	9.30496e-09	9.30496e-13		280	3.25674e-09	3.25674e-13
													281	4.68333	6.97872e-09	6.97872e-13		281	2.66937e-09	2.66937e-13		281	4.65248e-09	4.65248e-13		281	1.62837e-09	1.62837e-13
													282	4.7	3.48936e-09	3.48936e-13		282	1.33468e-09	1.33468e-13		282	2.32624e-09	2.32624e-13		282	8.14184e-10	8.14184e-14
													283	4.71667	1.74468e-09	1.74468e-13		283	6.67342e-10	6.67342e-14		283	1.16312e-09	1.16312e-13		283	4.07092e-10	4.07092e-14
													284	4.73333	8.7234e-10	8.7234e-14		284	3.33671e-10	3.33671e-14		284	5.8156e-10	5.8156e-14		284	2.03546e-10	2.03546e-14
													285	4.75	4.3617e-10	4.3617e-14		285	1.66835e-10	1.66835e-14		285	2.9078e-10	2.9078e-14		285	1.01773e-10	1.01773e-14
													286	4.76667	2.18085e-10	2.18085e-14		286	8.34177e-11	8.34177e-15		286	1.4539e-10	1.4539e-14		286	5.08865e-11	5.08865e-15
													287	4.78333	1.09042e-10	1.09042e-14		287	4.17089e-11	4.17089e-15		287	7.2695e-11	7.2695e-15		287	2.54432e-11	2.54432e-15
													288	4.8	5.45212e-11	5.45212e-15		288	2.08544e-11	2.08544e-15		288	3.63475e-11	3.63475e-15		288	1.27216e-11	1.27216e-15
													289	4.81667	2.72606e-11	2.72606e-15		289	1.04272e-11	1.04272e-15		289	1.81737e-11	1.81737e-15		289	6.36081e-12	6.36081e-16
													290	4.83333	1.36303e-11	1.36303e-15		290	5.21361e-12	5.21361e-16		290	9.08687e-12	9.08687e-16		290	3.18041e-12	3.18041e-16
													291	4.85	6.81515e-12	6.81515e-16		291	2.6068e-12	2.6068e-16		291	4.54344e-12	4.54344e-16		291	1.5902e-12	1.5902e-16
													292	4.86667	3.40758e-12	3.40758e-16		292	1.3034e-12	1.3034e-16		292	2.27172e-12	2.27172e-16		292	7.95101e-13	7.95101e-17
													293	4.88333	1.70379e-12	1.70379e-16		293	6.51701e-13	6.51701e-17		293	1.13586e-12	1.13586e-16		293	3.97551e-13	3.97551e-17
													294	4.9	8.51894e-13	8.51894e-17		294	3.2585e-13	3.2585e-17		294	5.6793e-13	5.6793e-17		294	1.98775e-13	1.98775e-17
													295	4.91667	4.25947e-13	4.25947e-17		295	1.62925e-13	1.62925e-17		295	2.83965e-13	2.83965e-17		295	9.93877e-14	9.93877e-18
													296	4.93333	2.12974e-13	2.12974e-17		296	8.14626e-14	8.14626e-18		296	1.41982e-13	1.41982e-17		296	4.96938e-14	4.96938e-18
													297	4.95	1.06487e-13	1.06487e-17		297	4.07313e-14	4.07313e-18		297	7.09912e-14	7.09912e-18		297	2.48469e-14	2.48469e-18
													298	4.96667	5.32434e-14	5.32434e-18		298	2.03657e-14	2.03657e-18		298	3.54956e-14	3.54956e-18		298	1.24235e-14	1.24235e-18
													299	4.98333	2.66217e-14	2.66217e-18		299	1.01828e-14	1.01828e-18		299	1.77478e-14	1.77478e-18		299	6.21173e-15	6.21173e-19
													300	5	1.33108e-14	1.33108e-18		300	5.09141e-15	5.09141e-19		300	8.8739e-15	8.8739e-19		300	3.10586e-15	3.10586e-19
													301	5.01667	6.65542e-15	6.65542e-19		301	2.54571e-15	2.54571e-19		301	4.43695e-15	4.43695e-19		301	1.55293e-15	1.55293e-19
													302	5.03333	3.32771e-15	3.32771e-19		302	1.27285e-15	1.27285e-19		302	2.21847e-15	2.21847e-19		302	7.76466e-16	7.76466e-20
													303	5.05	1.66386e-15	1.66386e-19		303	6.36427e-16	6.36427e-20		303	1.10924e-15	1.10924e-19		303	3.88233e-16	3.88233e-20
													304	5.06667	8.31928e-16	8.31928e-20		304	3.18213e-16	3.18213e-20		304	5.54619e-16	5.54619e-20		304	1.94117e-16	1.94117e-20
													305	5.08333	4.15964e-16	4.15964e-20		305	1.59107e-16	1.59107e-20		305	2.77309e-16	2.77309e-20		305	9.70583e-17	9.70583e-21
													306	5.1	2.07982e-16	2.07982e-20		306	7.95533e-17	7.95533e-21		306	1.38655e-16	1.38655e-20		306	4.85291e-17	4.85291e-21
													307	5.11667	1.03991e-16	1.03991e-20		307	3.97767e-17	3.97767e-21		307	6.93273e-17	6.93273e-21		307	2.42646e-17	2.42646e-21
													308	5.13333	5.19955e-17	5.19955e-21		308	1.98883e-17	1.98883e-21		308	3.46637e-17	3.46637e-21		308	1.21323e-17	1.21323e-21
													309	5.15	2.59978e-17	2.59978e-21		309	9.94417e-18	9.94417e-22		309	1.73318e-17	1.73318e-21		309	6.06614e-18	6.06614e-22
													310	5.16667	1.29989e-17	1.29989e-21		310	4.97208e-18	4.97208e-22		310	8.66592e-18	8.66592e-22		310	3.03307e-18	3.03307e-22
													311	5.18333	6.49944e-18	6.49944e-22		311	2.48604e-18	2.48604e-22		311	4.33296e-18	4.33296e-22		311	1.51654e-18	1.51654e-22
													312	5.2	3.24972e-18	3.24972e-22		312	1.24302e-18	1.24302e-22		312	2.16648e-18	2.16648e-22		312	7.58268e-19	7.58268e-23
													313	5.21667	1.62486e-18	1.62486e-22		313	6.2151e-19	6.2151e-23		313	1.08324e-18	1.08324e-22		313	3.79134e-19	3.79134e-23
													314	5.23333	8.1243e-19	8.1243e-23		314	3.10755e-19	3.10755e-23		314	5.4162e-19	5.4162e-23		314	1.89567e-19	1.89567e-23
													315	5.25	4.06215e-19	4.06215e-23		315	1.55378e-19	1.55378e-23		315	2.7081e-19	2.7081e-23		315	9.47835e-20	9.47835e-24
													316	5.26667	2.03107e-19	2.03107e-23		316	7.76888e-20	7.76888e-24		316	1.35405e-19	1.35405e-23		316	4.73917e-20	4.73917e-24
													317	5.28333	1.01554e-19	1.01554e-23		317	3.88444e-20	3.88444e-24		317	6.77025e-20	6.77025e-24		317	2.36959e-20	2.36959e-24
													318	5.3	5.07769e-20	5.07769e-24		318	1.94222e-20	1.94222e-24		318	3.38512e-20	3.38512e-24		318	1.18479e-20	1.18479e-24
													319	5.31667	2.53884e-20	2.53884e-24		319	9.7111e-21	9.7111e-25		319	1.69256e-20	1.69256e-24		319	5.92397e-21	5.92397e-25
													320	5.33333	1.26942e-20	1.26942e-24		320	4.85555e-21	4.85555e-25		320	8.46281e-21	8.46281e-25		320	2.96198e-21	2.96198e-25
													321	5.35	6.34711e-21	6.34711e-25		321	2.42778e-21	2.42778e-25		321	4.2314e-21	4.2314e-25		321	1.48099e-21	1.48099e-25
													322	5.36667	3.17355e-21	3.17355e-25		322	1.21389e-21	1.21389e-25		322	2.1157e-21	2.1157e-25		322	7.40496e-22	7.40496e-26
													323	5.38333	1.58678e-21	1.58678e-25		323	6.06944e-22	6.06944e-26		323	1.05785e-21	1.05785e-25		323	3.70248e-22	3.70248e-26
													324	5.4	7.93388e-22	7.93388e-26		324	3.03472e-22	3.03472e-26		324	5.28926e-22	5.28926e-26		324	1.85124e-22	1.85124e-26
													325	5.41667	3.96694e-22	3.96694e-26		325	1.51736e-22	1.51736e-26		325	2.64463e-22	2.64463e-26		325	9.2562e-23	9.2562e-27
													326	5.43333	1.98347e-22	1.98347e-26		326	7.5868e-23	7.5868e-27		326	1.32231e-22	1.32231e-26		326	4.6281e-23	4.6281e-27
													327	5.45	9.91736e-23	9.91736e-27		327	3.7934e-23	3.7934e-27		327	6.61157e-23	6.61157e-27		327	2.31405e-23	2.31405e-27
													328	5.46667	4.95868e-23	4.95868e-27		328	1.8967e-23	1.8967e-27		328	3.30579e-23	3.30579e-27		328	1.15702e-23	1.15702e-27
													329	5.48333	2.47934e-23	2.47934e-27		329	9.4835e-24	9.4835e-28		329	1.65289e-23	1.65289e-27		329	5.78512e-24	5.78512e-28
													330	5.5	1.23967e-23	1.23967e-27		330	4.74175e-24	4.74175e-28		330	8.26446e-24	8.26446e-28		330	2.89256e-24	2.89256e-28
													331	5.51667	6.19835e-24	6.19835e-28		331	2.37087e-24	2.37087e-28		331	4.13223e-24	4.13223e-28		331	1.44628e-24	1.44628e-28
													332	5.53333	3.09917e-24	3.09917e-28		332	1.18544e-24	1.18544e-28		332	2.06612e-24	2.06612e-28		332	7.2314e-25	7.2314e-29
													333	5.55	1.54959e-24	1.54959e-28		333	5.92719e-25	5.92719e-29		333	1.03306e-24	1.03306e-28		333	3.6157e-25	3.6157e-29
													334	5.56667	7.74793e-25	7.74793e-29		334	2.96359e-25	2.96359e-29		334	5.16529e-25	5.16529e-29		334	1.80785e-25	1.80785e-29
													335	5.58333	3.87397e-25	3.87397e-29		335	1.4818e-25	1.4818e-29		335	2.58264e-25	2.58264e-29		335	9.03926e-26	9.03926e-30
													336	5.6	1.93698e-25	1.93698e-29		336	7.40898e-26	7.40898e-30		336	1.29132e-25	1.29132e-29		336	4.51963e-26	4.51963e-30
													337	5.61667	9.68492e-26	9.68492e-30		337	3.70449e-26	3.70449e-30		337	6.45661e-26	6.45661e-30		337	2.25981e-26	2.25981e-30
													338	5.63333	4.84246e-26	4.84246e-30		338	1.85225e-26	1.85225e-30		338	3.22831e-26	3.22831e-30		338	1.12991e-26	1.12991e-30
													339	5.65	2.42123e-26	2.42123e-30		339	9.26123e-27	9.26123e-31		339	1.61415e-26	1.61415e-30		339	5.64953e-27	5.64953e-31
													340	5.66667	1.21061e-26	1.21061e-30		340	4.63061e-27	4.63061e-31		340	8.07076e-27	8.07076e-31		340	2.82477e-27	2.82477e-31
													341	5.68333	6.05307e-27	6.05307e-31		341	2.31531e-27	2.31531e-31		341	4.03538e-27	4.03538e-31		341	1.41238e-27	1.41238e-31
													342	5.7	3.02654e-27	3.02654e-31		342	1.15765e-27	1.15765e-31		342	2.01769e-27	2.01769e-31		342	7.06192e-28	7.06192e-32
													343	5.71667	1.51327e-27	1.51327e-31		343	5.78827e-28	5.78827e-32		343	1.00885e-27	1.00885e-31		343	3.53096e-28	3.53096e-32
													344	5.73333	7.56634e-28	7.56634e-32		344	2.89413e-28	2.89413e-32		344	5.04423e-28	5.04423e-32		344	1.76548e-28	1.76548e-32
													345	5.75	3.78317e-28	3.78317e-32		345	1.44707e-28	1.44707e-32		345	2.52211e-28	2.52211e-32		345	8.8274e-29	8.8274e-33
													346	5.76667	1.89159e-28	1.89159e-32		346	7.23533e-29	7.23533e-33		346	1.26106e-28	1.26106e-32		346	4.4137e-29	4.4137e-33
													347	5.78333	9.45793e-29	9.45793e-33		347	3.61767e-29	3.61767e-33		347	6.30528e-29	6.30528e-33		347	2.20685e-29	2.20685e-33
													348	5.8	4.72896e-29	4.72896e-33		348	1.80883e-29	1.80883e-33		348	3.15264e-29	3.15264e-33		348	1.10342e-29	1.10342e-33
													349	5.81667	2.36448e-29	2.36448e-33		349	9.04417e-30	9.04417e-34		349	1.57632e-29	1.57632e-33		349	5.51712e-30	5.51712e-34
													350	5.83333	1.18224e-29	1.18224e-33		350	4.52208e-30	4.52208e-34		350	7.88161e-30	7.88161e-34		350	2.75856e-30	2.75856e-34
													351	5.85	5.9112e-30	5.9112e-34		351	2.26104e-30	2.26104e-34		351	3.9408e-30	3.9408e-34		351	1.37928e-30	1.37928e-34
													352	5.86667	2.9556e-30	2.9556e-34		352	1.13052e-30	1.13052e-34		352	1.9704e-30	1.9704e-34		352	6.8964e-31	6.8964e-35
													353	5.88333	1.4778e-30	1.4778e-34		353	5.6526e-31	5.6526e-35		353	9.85201e-31	9.85201e-35		353	3.4482e-31	3.4482e-35
													354	5.9	7.38901e-31	7.38901e-35		354	2.8263e-31	2.8263e-35		354	4.926e-31	4.926e-35		354	1.7241e-31	1.7241e-35
													355	5.91667	3.6945e-31	3.6945e-35		355	1.41315e-31	1.41315e-35		355	2.463e-31	2.463e-35		355	8.62051e-32	8.62051e-36
													356	5.93333	1.84725e-31	1.84725e-35		356	7.06576e-32	7.06576e-36		356	1.2315e-31	1.2315e-35		356	4.31025e-32	4.31025e-36
													357	5.95	9.23626e-32	9.23626e-36		357	3.53288e-32	3.53288e-36		357	6.1575e-32	6.1575e-36		357	2.15513e-32	2.15513e-36
													358	5.96667	4.61813e-32	4.61813e-36		358	1.76644e-32	1.76644e-36		358	3.07875e-32	3.07875e-36		358	1.07756e-32	1.07756e-36
													359	5.98333	2.30906e-32	2.30906e-36		359	8.83219e-33	8.83219e-37		359	1.53938e-32	1.53938e-36		359	5.38782e-33	5.38782e-37
													360	6	1.15453e-32	1.15453e-36		360	4.4161e-33	4.4161e-37		360	7.69688e-33	7.69688e-37		360	2.69391e-33	2.69391e-37

## Sheet: Fig 6C
		Date	Channel	Time - Rate	Conc during Clamp	pk ht - 1st phase	plateau ht - 2nd phase
	1	2020-09-17		15 - 6.5	0.15	1.02	1
	2	2020-09-17		15 - 11.5	0.27	1.05	1.01
	3	2020-09-29		32 - 6.5	0.33	1.18	1
	4	2020-09-29	4	21 - 11.5	0.38	1.23	1.22
	5	2020-09-29		27.5 - 11.5	0.49	1.36	1.33
	6	2020-09-29		45 - 6.5	0.46	1.34	1.32
	7	2020-09-17		30 - 11.5	0.54	1.3	1.29
	8	2020-09-03	3	60 - 6.5	0.61	1.34	1.11
	9	2020-09-03	1	90 - 6.5	0.92	1.38	0.84
	10	2020-09-03	4	60 - 11.5	1.07	1.4	0.83
	11	2020-09-03	2	90 11.5	1.61	1.29	0.64

## Sheet: Fig 6D  
			Normalized Calcium		Representative Profile
		Adj time	060921	021821	070121
		-72.5	-0.0533336	-3.12031	-0.300507
		-72	-0.0577252	-3.12031	-0.297905
		-71.5	-0.0571396	-3.12031	-0.303792
		-71	-0.0530408	-3.12031	-0.30256
		-70.5	-0.0625559	-3.12031	-0.295304
		-70	-0.0679722	-3.12031	-0.296947
		-69.5	-0.0754379	-3.12031	-0.295715
		-69	-0.0758771	-3.12031	-0.296673
		-68.5	-0.0681186	-3.12031	-0.290376
		-68	-0.0676794	-3.12031	-0.29284
		-67.5	-0.0621168	-3.12031	-0.289007
		-67	-0.0684114	-3.12031	-0.284352
		-66.5	-0.0758771	-3.12031	-0.280929
		-66	-0.0758771	-3.12031	-0.280929
		-65.5	-0.0786584	-3.12031	-0.279697
		-65	-0.072071	-3.12031	-0.278191
		-64.5	-0.0769018	-3.12031	-0.270798
		-64	-0.0777801	-3.12031	-0.270114
		-63.5	-0.0796832	-3.12031	-0.267923
		-63	-0.072071	-3.12031	-0.267102
		-62.5	-0.0668011	-3.12031	-0.262036
		-62	-0.070168	-3.12031	-0.267649
		-61.5	-0.0628487	-3.12031	-0.262995
		-61	-0.0624095	-3.12031	-0.260393
		-60.5	-0.0653373	-3.12031	-0.250673
		-60	-0.0666547	-3.12031	-0.246566
		-59.5	-0.0549438	-3.12031	-0.244375
		-59	-0.0654836	-3.12031	-0.237804
		-58.5	-0.0689969	-3.12031	-0.236983
		-58	-0.0631415	-3.12031	-0.23534
		-57.5	-0.0627023	-3.12031	-0.230685
		-57	-0.0688505	-3.12031	-0.229179
		-56.5	-0.0539191	-3.12031	-0.228495
		-56	-0.0530408	-3.12031	-0.216858
		-55.5	-0.0405979	-3.12031	-0.220828
		-55	-0.0400124	-3.12031	-0.2185
		-54.5	-0.0468925	-3.12031	-0.216036
		-54	-0.041769	-3.12031	-0.212614
		-53.5	-0.0473317	-3.12031	-0.21275
		-53	-0.0389877	-3.12031	-0.206453
		-52.5	-0.0416226	-3.12031	-0.20659
		-52	-0.0413298	-0.212559	-0.201935
		-51.5	-0.0376702	-0.210851	-0.197828
		-51	-0.0442576	-0.206657	-0.194816
		-50.5	-0.0410371	-0.201998	-0.191667
		-50	-0.0367919	-0.202775	-0.186328
		-49.5	-0.0394268	-0.198426	-0.186054
		-49	-0.0376702	-0.195941	-0.184548
		-48.5	-0.0369382	-0.194544	-0.182768
		-48	-0.0247881	-0.189263	-0.175375
		-47.5	-0.0201038	-0.18771	-0.170584
		-47	-0.0253737	-0.185536	-0.168119
		-46.5	-0.0176152	-0.181498	-0.167435
		-46	-0.026252	-0.182585	-0.163875
		-45.5	-0.024349	-0.178392	-0.159494
		-45	-0.0135164	-0.173888	-0.156482
		-44.5	-0.0167369	-0.171248	-0.153334
		-44	-0.0180544	-0.168763	-0.152923
		-43.5	-0.0174688	-0.164104	-0.150732
		-43	-0.00531872	-0.163794	-0.14553
		-42.5	-0.0158586	-0.157115	-0.145667
		-42	-0.0151266	-0.157271	-0.14553
		-41.5	-0.010735	-0.155097	-0.140875
		-41	-0.00590426	-0.15665	-0.134988
		-40.5	0.0101983	-0.151525	-0.134715
		-40	0.002147	-0.149972	-0.132661
		-39.5	9.75911e-05	-0.148729	-0.128006
		-39	0.0055139	-0.145468	-0.126226
		-38.5	0.0140043	-0.140032	-0.122119
		-38	0.00873441	-0.137081	-0.117328
		-37.5	0.0164929	-0.13615	-0.116917
		-37	0.0189815	-0.134907	-0.11281
		-36.5	0.0181032	-0.131956	-0.112947
		-36	0.0295213	-0.129316	-0.109661
		-35.5	0.0314243	-0.13149	-0.103637
		-35	0.0317171	-0.131956	-0.104459
		-34.5	0.0353768	-0.128695	-0.098024
		-34	0.0359623	-0.129006	-0.0978871
		-33.5	0.0621655	-0.126365	-0.0952859
		-33	0.0399148	-0.125278	-0.0913157
		-32.5	0.0403539	-0.118134	-0.0892621
		-32	-1.01231	-0.114718	-0.0847442
		-31.5	-0.0136628	-0.112854	-0.0818692
		-31	-2.92354	-0.113165	-0.0818692
		-30.5	-0.00487956	-0.110058	-0.0729704
		-30	-0.00385485	-0.101051	-0.0711906
		-29.5	-0.0190791	-0.0993425	-0.0703692
		-29	-0.00824645	-0.10074	-0.0665358
		-28.5	-0.010735	-0.0981001	-0.0653037
		-28	-0.0161513	-0.0979448	-0.064893
		-27.5	-0.00605065	-0.0971683	-0.0611965
		-27	-0.00136628	-0.0906455	-0.0594168
		-26.5	-0.00853922	-0.0878501	-0.0613335
		-26	-0.00165905	-0.0838122	-0.0606489
		-25.5	-0.00692897	-0.0844334	-0.0622918
		-25	-0.00707536	-0.0802402	-0.0755716
		-24.5	-0.00121989	-0.0802402	-0.0831014
		-24	-0.00121989	-0.0757364	-0.0943276
		-23.5	-0.00385485	-0.0835016	-0.0943276
		-23	-0.00590426	-0.0721644	-0.096518
		-22.5	0.00463558	-0.0735621	-0.0913157
		-22	0.0077097	-0.0706114	-0.0935061
		-21.5	0.00170784	-0.0678159	-0.0876192
		-21	0.00287894	-0.0682818	-0.0843335
		-20.5	0.000975911	-0.0631568	-0.0839228
		-20	-0.0101495	-0.060206	-0.0818692
		-19.5	-0.00853922	-0.0605166	-0.0766668
		-19	-0.0299117	-0.0508878	-0.0774882
		-18.5	-0.0299117	-0.0538386	-0.0724228
		-18	-0.0214213	-0.0502666	-0.0736549
		-17.5	-0.0203965	-0.0487136	-0.0672204
		-17	-0.0247881	-0.0437439	-0.0670835
		-16.5	-0.0234707	-0.0438992	-0.0657144
		-16	-0.0252273	-0.0452969	-0.0647561
		-15.5	-0.0186399	-0.0372211	-0.0585954
		-15	-0.0221532	-0.0330279	-0.0543513
		-14.5	-0.0236171	-0.0306983	-0.0528453
		-14	-0.0242026	-0.0311643	-0.0529822
		-13.5	-0.0233243	-0.0286794	-0.0538037
		-13	-0.0231779	-0.0268158	-0.0472322
		-12.5	-0.019811	-0.0261945	-0.0424406
		-12	-0.0151266	-0.0257286	-0.0433989
		-11.5	-0.0190791	-0.0226226	-0.043262
		-11	-0.0098567	-0.0280582	-0.0362798
		-10.5	-0.0108814	-0.0282135	-0.036006
		-10	-0.00868561	-0.0275923	-0.0316251
		-9.5	-0.008832	-0.0232438	-0.0325834
		-9	-0.00605065	-0.0207589	-0.0276548
		-8.5	-0.0104423	-0.0209142	-0.0290239
		-8	-0.00561149	-0.0188953	-0.0220417
		-7.5	-0.00736813	-0.0162551	-0.0228631
		-7	-0.0139555	-0.016721	-0.0197143
		-6.5	0.0055139	-0.0137703	-0.0195774
		-6	0.00624583	-0.0109748	-0.013006
		-5.5	-0.00356208	-0.00957706	-0.0156072
		-5	-0.00824645	-0.00740281	-0.0146488
		-4.5	-0.00487956	-0.00445204	-0.0120476
		-4	0.00639222	0.0012942	-0.00972026
		-3.5	-0.00605065	0.00253663	-0.0026012
		-3	-0.00927116	0.00269193	-0.00177977
		-2.5	-0.0010735	0.00440027	0.00397025
		-2	0.000536751	0.00672982	0.00397025
		-1.5	-0.00575788	0.00626391	0.00670835
		-1	-0.00283014	0.00968059	0.00862502
		-0.5	0.0011223	0.00859347	0.00670835
		0	-0.00180544	0.00424497	0.00451787
		0.5	0.00580667	0.00098359	-0.000136905
		1	0.00361087	-0.00957706	-0.010131
		1.5	0.000390365	-0.0313196	-0.0242322
		2	-0.00897838	-0.0476264	-0.0433989
		2.5	-0.0170297	-0.0564787	-0.0663989
		3	0.0077097	-0.0474711	-0.0564049
		3.5	0.0766578	0.0466429	0.255465
		4	1.52018	0.757468	0.839912
		4.5	1.53101	1.14402	1.00557
		5	1.17309	1.2313	1.09524
		5.5	1.01734	1.20723	1.18382
		6	0.939168	1.2212	1.18834
		6.5	0.854849	1.17228	1.1689
		7	0.812836	1.16483	1.12413
		7.5	0.78678	1.11932	1.08566
		8	0.774044	1.10411	1.03884
		8.5	0.741839	1.0659	1.00817
		9	0.736715	1.09121	0.962716
		9.5	0.738911	1.06792	0.925615
		10	0.718856	1.10271	0.896591
		10.5	0.723394	0.999275	0.811573
		11	0.730128	1.07289	0.8024
		11.5	0.728957	1.03872	0.815543
		12	0.759113	0.991044	0.877972
		12.5	0.772141	0.98359	0.801579
		13	0.797466	0.993374	0.833478
		13.5	0.79	0.995703	0.98202
		14	0.808591	1.03795	0.946151
		14.5	0.83011	1.07227	0.918496
		15	0.850751	0.95843	0.877835
		15.5	0.80903	0.997567	0.942454
		16	0.872562	0.975358	1.00666
		16.5	0.846945	1.04152	0.933966
		17	0.888958	1.0089	0.929996
		17.5	0.8771	0.957188	0.989413
		18	0.917503	0.93529	1.03897
		18.5	0.887786	1.0044	1.02939
		19	0.865975	1.00828	0.928901
		19.5	0.87388	0.978775	1.01707
		20	0.950294	0.958275	0.960389
		20.5	0.906817	0.904851	0.993246
		21	0.946927	1.05068	0.988865
		21.5	0.917503	0.961071	0.996418
		22	0.942096	1.04571	1.01125
		22.5	0.937997	0.95843	1.00689
		23	0.930385	0.997567	0.99895
		23.5	0.916478	0.975358	0.964428
		24	0.911355	1.04152	0.915233
		24.5	0.972544	1.0089	0.865377
		25	0.982791	0.957188	0.848378
		25.5	1.03534	0.93529	0.861361
		26	0.984255	1.0044	1.2394
		26.5	0.960541	1.00828	1.00516
		27	1.02949	0.978775	1.00584
		27.5	0.953514	0.958275	0.964085
		28	0.968592	0.904851	0.975175
		28.5	1.0513	1.05068	0.934103
		29	1.0128	0.961071	1.04527
		29.5	1.02773	1.04571	1.02569
		30	0.95044	1.0089	0.934377
		30.5	0.930092	0.957188	1.05581
		31	0.977229	0.992908	1.06567
		31.5	1.01178	0.97862	0.97271
		32	0.963468	1.02257	0.956555
		32.5	1.07516	0.982347	1.00981
		33	1.00138	0.889165	0.917674
		33.5	1.09946	1.0249	0.955597
		34	0.97679	0.899726	1.01789
		34.5	0.995527	1.11467	0.960389
		35	1.0494	0.918362	0.984758
		35.5	1.01075	0.95843	1.01269
		36	0.982499	1.06497	1.0747
		36.5	1.09551	0.984987	1.01789
		37	1.04749	0.955014	0.990919
		37.5	0.904914	1.06512	0.912746
		38	0.897302	1.09417	0.777621
		38.5	1.30001	0.931408	0.717519
		39	1.52106	0.951752	0.775567
		39.5	1.5881	0.950665	0.915895
		40	1.60098	0.93032	1.06882
		40.5	1.59527	0.95843	1.2394
		41	1.73756	0.8331	1.34523
		41.5	1.94602	0.998343	1.32168
		42	2.13368	0.877983	1.34098
		42.5	2.24172	1.0117	1.36494
		43	2.37566	0.951597	1.41204
		43.5	2.5099	0.964021	1.49692
		44	2.58163	1.06186	1.62178
		44.5	2.64282	1.02521	1.70844
		45	2.68907	0.912616	1.79482
		45.5	2.7103	0.899881	1.88327
		46	2.74514	1.00564	1.94337
		46.5	2.74558	0.810426	1.99909
		47	2.77837	0.992287	2.05344
		47.5	2.85537	0.884351	2.093
		48	2.89255	0.833256	2.11984
		48.5	2.9312	0.737744	2.15584
		49	2.96692	0.771911	2.19308
		49.5	3.0183	0.754517	2.22854
		50	3.05138	0.82021	2.26578
		50.5	3.07802	0.953616	2.31014
		51	3.10862	1.03857	2.33889
		51.5	3.1013	1.14775	2.3764
		52	3.1316	1.18284	2.39118
		52.5	3.1619	1.24916	2.41843
		53	3.17859	1.24543	2.45046
		53.5	3.16922	1.24201	2.44567
		54	3.17566	1.25087	2.4799
		54.5	3.17479	1.22773	2.5044
		55	3.18123	1.21282	2.51426
		55.5	3.20977	1.21033	2.52781
		56	3.21153	1.19527	2.54493
		56.5	3.20875	1.16887	2.55876
		57	3.20362	1.16297	2.57039
		57.5	3.2168	1.15815	2.57902
		58	3.2168	1.15272	2.59011
		58.5	3.22514	1.17896	2.60749
		59	3.23539	1.19061	2.61393
		59.5	3.24037	1.21577	2.63337
		60	3.24974	1.23689	2.64405
		60.5	3.27506	1.26376	2.65637
		61	3.2979	1.29094	2.66691
		61.5	3.30434	1.32106	2.66705
		62	3.32351	1.35663	2.68608
		62.5	3.32337	1.38505	2.68868
		63	3.34108	1.42776	2.69799
		63.5	3.34284	1.45338	2.70853
		64	3.36245	1.48569	2.73112
		64.5	3.40081	1.52808	2.73317
		65	3.41091	1.56955	2.72236
		65.5	3.409	1.59968	2.73618
		66	3.42159	1.64441	2.75124
		66.5	3.44458	1.67469	2.74385
		67	3.43799	1.72237	2.75275
		67.5	3.45482	1.75188	2.7674
		68	3.46829	1.79163	2.77219
		68.5	3.48103	1.83916	2.77561
		69	3.47781	1.88528	2.78301
		69.5	3.50255	1.93793	2.78876
		70	3.50913	1.98437	2.79943
		70.5	3.53929	2.04431	2.79957
		71	3.54968	2.10286	2.81134
		71.5	3.56505	2.1625	2.80779
		72	3.56271	2.22307	2.82462
		72.5	3.57325	2.29109	2.82408
		73	3.59184	2.3397	2.82955
		73.5	3.6138	2.37635	2.84475
		74	3.61131	2.39949	2.84393
		74.5	3.622	2.41984	2.85557
		75	3.64835	2.44702	2.85995
		75.5	3.65201	2.46441	2.87898
		76	3.66386	2.49469	2.88021
		76.5	3.67894	2.51302	2.88254
		77	3.70734	2.53414	2.88336
		77.5	3.71159	2.55542	2.9028
		78	3.71027	2.56318	2.90157
		78.5	3.71525	2.57809	2.90307
		79	3.7413	2.59999	2.90896
		79.5	3.7375	2.61707	2.92169
		80	3.74774	2.61583	2.92908
		80.5	3.76926	2.63649	2.93743
		81	3.76472	2.64984	2.93497
		81.5	3.77409	2.6604	2.92183
		82	3.79839	2.66988	2.94852
		82.5	3.80337	2.6691	2.9566
		83	3.82723	2.67919	2.96139
		83.5	3.81947	2.69162	2.96002
		84	3.84977	2.69069	2.9807
		84.5	3.84875	2.69022	2.98699
		85	3.8587	2.70032	2.97467
		85.5	3.88988	2.70668	2.98686
		86	3.87817	2.71119	2.99315
		86.5	3.88564	2.71429	2.99466
		87	3.91492	2.72051	2.99726
		87.5	3.91389	2.72563	2.99726
		88	3.93644	2.73402	3.01095
		88.5	3.95693	2.73588	3.01862
		89	3.96322	2.73044	3.02026
		89.5	3.9644	2.73712	3.02724
		90	3.98723	2.74085	3.02916
		90.5	4.00553	2.73557	3.03669
		91	4.01461	2.7511	3.04942
		91.5	4.01914	2.74629	3.05682
		92	4.05398	2.75265	3.06476
		92.5	4.03803	2.75172	3.06051
		93	4.05135	2.75887	3.07119
		93.5	4.0572	2.77393	3.07612
		94	4.07433	2.76554	3.0842
		94.5	4.08077	2.75157	3.07817
		95	4.08502	2.75809	3.07667
		95.5	4.10961	2.76787	3.0727
		96	4.11151	2.76648	3.05285
		96.5	4.12674	2.76477	3.03765
		97	4.13362	2.77579	2.98836
		97.5	4.14709	2.7716	2.95674
		98	4.14855	2.77595	2.90225
		98.5	4.14826	2.77735	2.84229
		99	4.15528	2.79754	2.74878
		99.5	4.15411	2.7876	2.65363
		100	4.15836	2.78465	2.51495
		100.5	4.17065	2.78496	2.32314
		101	4.16377	2.78837	1.96472
		101.5	4.17197	2.79614	1.54429
		102	4.1528	2.79365	1.229
		102.5	4.14313	2.80328	1.09866
		103	4.13362	2.80421	1.05266
		103.5	4.1244	2.80064	1.02638
		104	4.10698	2.79148	1.01118
		104.5	4.05164	2.80732	1.00598
		105	3.99938	2.8112	1.00406
		105.5	3.92311	2.81353	0.998859
		106	3.82606	2.81974	0.992698
		106.5	3.74189	2.82596	0.995026
		107	3.5772	2.82502	0.985716
		107.5	3.38236	2.83015	0.986264
		108	3.09135	2.82099	0.989823
		108.5	2.64355	2.82984	0.984347
		109	2.27319	2.83496	0.973942
		109.5	2.06108	2.8432	0.984758
		110	1.93943	2.8404	0.990645
		110.5	1.88907	2.84413	0.991056
		111	1.86711	2.8491	0.991192
		111.5	1.84516	2.84351	0.992014
		112	1.83623	2.84894	0.998585
		112.5	1.85057	2.8595	0.986811
		113	1.84457	2.8581	0.988454
		113.5	1.85818	2.86602	0.979829
		114	1.87897	2.86137	0.994341
		114.5	1.89756	2.86137	0.989276
		115	1.92201	2.8609	1.00173
		115.5	1.93445	2.85733	1.00598
		116	1.95172	2.8668	1.00078
		116.5	1.94016	2.86012	1.0016
		117	1.96095	2.86773	1.00269
		117.5	1.99447	2.86665	0.994204
		118	1.9933	2.86804	1.00187
		118.5	2.02009	2.87565	1.00269
		119	2.05712	2.87923	1.00639
		119.5	2.07645	2.87131	1.00885
		120	2.12358	2.88777	1.01337
		120.5	2.14598	2.88218	1.02542
		121	2.17701	2.8814	1.01871
		121.5	2.21098	2.88016	1.02364
		122	2.23176	2.8828	1.02323
		122.5	2.27129	2.88062	1.02597
		123	2.29764	2.87736	1.02268
		123.5	2.33467	2.88637	1.01967
		124	2.36424	2.88699	1.01625
		124.5	2.37873	2.8741	1.01939
		125	2.41021	2.88233	1.02898
		125.5	2.43992	2.87084	1.03226
		126	2.47433	2.88497	1.03623
		126.5	2.48252	2.88295	1.0413
		127	2.50521	2.87659	1.03829
		127.5	2.51297	2.87224	1.0324
		128	2.56113	2.88078	1.0335
		128.5	2.55996	2.88156	1.04075
		129	2.57972	2.87736	1.04883
		129.5	2.61339	2.87395	1.04445
		130	2.63096	2.86711	1.04062
		130.5	2.65775	2.86882	1.04637
		131	2.68483	2.87845	1.04308
		131.5	2.70986	2.86602	1.04664
		132	2.7264	2.85841	1.0554
		132.5	2.75012	2.8637	1.05006
		133	2.7753	2.87146	1.04691
		133.5	2.79813	2.86478	1.03952
		134	2.80823	2.86432	1.0402
		134.5	2.82624	2.85189	1.04048
		135	2.84278	2.84568	1.035
		135.5	2.87923	2.84894	1.03418
		136	2.88948	2.83993	1.02925
		136.5	2.89914	2.83854	1.04007
		137	2.92095	2.82953	1.03089
		137.5	2.91949	2.83046	1.03021
		138	2.93647	2.82906	1.0554
		138.5	2.94379	2.81881	1.05006
		139	2.96457	2.81462	1.04691
		139.5	2.96531	2.81167	1.03952
		140	2.98639	2.8185	1.0402
		140.5	3.00937	2.79769	1.04048
		141	2.99898	2.79521	1.035
		141.5	3.01596	2.7893	1.02925
		142	3.02093	2.79288	1.04007
		142.5	3.05387	2.77657	1.03089
		143	3.05958	2.76818	1.03021
		143.5	3.05519	2.77377	1.0554
